# Supplementary material for: Development of Machine Learning Models for Precise Prediction of Bioactive Supramolecular Nucleoside Hydrogels
Source: Research Square preprint supplement (doi:10.21203/rs.3.rs-6888838/v1), 2025-07-10
Supplement: Supplementary file 1 [file 1ad811b1c416c32666416c20.xlsx]

## Sheet: Total
Supplementary Data 7. The probability of 9 Bioactive
cid	Nontox	Anti-P. gingivalis	Anti-HSV-1	Anti-VZV	Anti-EBV	Anti-HIV	Anti-IL-1β	Anti-TNF-α	Anti-CAL 27
5273008	0.181644	0.848851	0.413187	0.107653	0.263425	0.0679527	0.517796	0.262714	0.482848
5273004	0.198203	0.724497	0.384725	0.0706856	0.343	0.0834429	0.462721	0.781503	0.562622
250899	0.203479	0.945895	0.389769	0.0758157	0.217834	0.0573038	0.179403	0.739264	0.28758
15926747	0.207072	0.493738	0.367455	0.186496	0.227517	0.136382	0.657401	0.487064	0.510686
9882903	0.207072	0.780552	0.385521	0.429147	0.232438	0.117928	0.473706	0.428866	0.594849
354624	0.207072	0.780552	0.385521	0.429147	0.232438	0.117928	0.473706	0.428866	0.594849
13989334	0.209321	0.861931	0.395029	0.237485	0.232377	0.353668	0.591054	0.76617	0.604856
13989335	0.209321	0.861931	0.395029	0.237485	0.232377	0.353668	0.591054	0.76617	0.604856
492197	0.21189	0.595034	0.409161	0.0589562	0.274996	0.0659687	0.311152	0.554989	0.429225
6483433	0.215533	0.892924	0.410465	0.428686	0.2633	0.0444966	0.414394	0.877507	0.545792
516053	0.219322	0.926398	0.401639	0.23039	0.290179	0.160491	0.645463	0.557746	0.47552
3034808	0.224004	0.556175	0.389757	0.201377	0.219733	0.354741	0.503127	0.539888	0.475406
14485373	0.224004	0.556175	0.389757	0.201377	0.219733	0.354741	0.503127	0.539888	0.475406
470067	0.22448	0.718263	0.369696	0.269134	0.30416	0.0740654	0.471249	0.445373	0.431665
12777818	0.224815	0.360095	0.353582	0.0371763	0.203175	0.4589	0.367729	0.774205	0.365253
87824027	0.225394	0.722926	0.376849	0.305513	0.238409	0.272375	0.488865	0.75777	0.587229
296233	0.225394	0.722926	0.376849	0.305513	0.238409	0.272375	0.488865	0.75777	0.587229
21147181	0.228426	0.790533	0.381424	0.42369	0.244419	0.267656	0.494963	0.566549	0.502787
24867261	0.228426	0.790533	0.381424	0.42369	0.244419	0.267656	0.494963	0.566549	0.502787
14330066	0.238835	0.633895	0.396365	0.122824	0.245677	0.365762	0.585754	0.52998	0.686774
14330067	0.238835	0.633895	0.396365	0.122824	0.245677	0.365762	0.585754	0.52998	0.686774
53791036	0.240896	0.8256	0.413935	0.228233	0.240176	0.100485	0.393407	0.513695	0.591375
92132405	0.241071	0.887426	0.39424	0.326781	0.248735	0.284707	0.580619	0.703022	0.724189
69626224	0.241071	0.887426	0.39424	0.326781	0.248735	0.284707	0.580619	0.703022	0.724189
11778706	0.241071	0.887426	0.39424	0.326781	0.248735	0.284707	0.580619	0.703022	0.724189
10040688	0.241261	0.740065	0.384549	0.440861	0.218432	0.122935	0.443336	0.497707	0.588375
77844687	0.241261	0.428419	0.366532	0.13137	0.206085	0.219363	0.617125	0.479815	0.49984
492559	0.242922	0.529445	0.366749	0.189108	0.290137	0.179905	0.572074	0.548656	0.444634
12777820	0.247487	0.306067	0.30761	0.0207666	0.202049	0.411017	0.346547	0.806226	0.344235
14803115	0.252416	0.587024	0.393433	0.153726	0.305787	0.133651	0.375174	0.74309	0.828749
14803116	0.252416	0.587024	0.393433	0.153726	0.305787	0.133651	0.375174	0.74309	0.828749
5487206	0.257013	0.953793	0.426145	0.0833722	0.391455	0.471121	0.305717	0.746512	0.48781
492117	0.258625	0.413249	0.306347	0.178363	0.264797	0.0334582	0.327861	0.505849	0.827379
492116	0.258625	0.413249	0.306347	0.178363	0.264797	0.0334582	0.327861	0.505849	0.827379
13989343	0.260788	0.595291	0.371219	0.280747	0.250794	0.142933	0.512988	0.789297	0.585842
162354766	0.263569	0.391841	0.354037	0.241613	0.217059	0.0964444	0.489297	0.816638	0.566453
15172869	0.2646	0.53743	0.410634	0.256387	0.230832	0.0536722	0.325497	0.755073	0.601468
3009936	0.269213	0.35073	0.403678	0.150502	0.309314	0.0449369	0.542323	0.882546	0.811937
90487625	0.269544	0.847385	0.444273	0.0716033	0.190347	0.256111	0.426834	0.779123	0.661766
11551453	0.271994	0.646278	0.400059	0.334053	0.206019	0.0399769	0.483733	0.685605	0.577421
9965654	0.277084	0.501036	0.389217	0.179146	0.20651	0.486311	0.379382	0.504706	0.463831
14284094	0.282173	0.754783	0.381064	0.417266	0.221626	0.206768	0.412092	0.600413	0.495331
511719	0.282717	0.72858	0.441436	0.18274	0.270694	0.186409	0.492809	0.458931	0.66151
21140106	0.282779	0.384394	0.400304	0.12987	0.282668	0.0562398	0.657206	0.925757	0.807023
15573114	0.285012	0.595125	0.407262	0.156555	0.247018	0.277824	0.567129	0.546641	0.638071
9879442	0.285012	0.595125	0.407262	0.156555	0.247018	0.277824	0.567129	0.546641	0.638071
15573115	0.285012	0.595125	0.407262	0.156555	0.247018	0.277824	0.567129	0.546641	0.638071
44398142	0.285012	0.595125	0.407262	0.156555	0.247018	0.277824	0.567129	0.546641	0.638071
40488632	0.285012	0.595125	0.407262	0.156555	0.247018	0.277824	0.567129	0.546641	0.638071
8974	0.285012	0.595125	0.407262	0.156555	#N/A	0.277824	0.567129	0.546641	0.638071
44629847	0.285012	0.595125	0.407262	0.156555	0.247018	0.277824	0.567129	0.546641	0.638071
11957496	0.285012	0.595125	0.407262	0.156555	0.247018	0.277824	0.567129	0.546641	0.638071
6603778	0.285012	0.595125	0.407262	0.156555	0.247018	0.277824	0.567129	0.546641	0.638071
504745	0.291944	0.541238	0.429479	0.29859	0.263655	0.194226	0.639102	0.885611	0.674279
71775556	0.292333	0.921293	0.394778	0.498205	0.275577	0.0663977	0.394511	0.575746	0.534103
124201	0.293693	0.792523	0.402514	0.317414	0.234019	0.419632	0.357917	0.60891	0.598406
493452	0.293986	0.511431	0.382291	0.399692	0.184604	0.3171	0.258657	0.718952	0.508912
287709	0.297555	0.331305	0.435989	0.111722	0.261499	0.0794345	0.366503	0.812196	0.554706
22791353	0.297697	0.819289	0.420724	0.437847	0.274533	0.0884757	0.586485	0.61908	0.651275
128924	0.298537	0.187323	0.33395	0.0543533	0.19869	0.0299319	0.645501	0.309723	0.799537
92132157	0.299434	0.697563	0.40891	0.144816	0.27888	0.419226	0.688789	0.695056	0.817036
73265308	0.299434	0.697563	0.40891	0.144816	0.27888	0.419226	0.688789	0.695056	0.817036
147569	0.299434	0.697563	0.40891	0.144816	0.27888	0.419226	0.688789	0.695056	0.817036
6602111	0.299434	0.697563	0.40891	0.144816	0.27888	0.419226	0.688789	0.695056	0.817036
90488943	0.299434	0.697563	0.40891	0.144816	0.27888	0.419226	0.688789	0.695056	0.817036
13009312	0.299434	0.697563	0.40891	0.144816	0.27888	0.419226	0.688789	0.695056	0.817036
265574	0.299618	0.716803	0.332541	0.0468019	0.27383	0.0294855	0.455192	0.328807	0.757268
24906265	0.299618	0.420847	0.347141	0.145279	0.22531	0.0313996	0.640299	0.375549	0.807176
10085225	0.299618	0.420847	0.347141	0.145279	0.22531	0.0313996	0.640299	0.375549	0.807176
92236137	0.299618	0.716803	0.332541	0.0468019	0.27383	0.0294855	0.455192	0.328807	0.757268
92236135	0.299618	0.716803	0.332541	0.0468019	0.27383	0.0294855	0.455192	0.328807	0.757268
16760678	0.299618	0.420847	0.347141	0.145279	0.22531	0.0313996	0.640299	0.375549	0.807176
131846804	0.299618	0.716803	0.332541	0.0468019	0.27383	0.0294855	0.455192	0.328807	0.757268
154726303	0.299892	0.854724	0.376093	0.317074	0.215114	0.196752	0.585065	0.803407	0.785002
493454	0.300593	0.532701	0.38487	0.343742	0.190758	0.38386	0.361226	0.565828	0.500248
197610	0.302507	0.883713	0.386552	0.343328	0.222174	0.0482984	0.538434	0.421063	0.810913
10517505	0.302507	0.883713	0.386552	0.343328	0.222174	0.0482984	0.538434	0.421063	0.810913
9973143	0.305869	0.819256	0.362996	0.0344246	0.254741	0.0331889	0.366976	0.614542	0.66604
56977943	0.306384	0.758438	0.366275	0.241978	0.203014	0.33502	0.32487	0.667757	0.426485
100938413	0.309774	0.696229	0.408351	0.415687	0.211992	0.0502367	0.569967	0.701979	0.629846
14018661	0.30996	0.620372	0.387321	0.244074	0.181316	0.184498	0.413102	0.707739	0.478722
13989345	0.311721	0.518023	0.411565	0.329181	0.235578	0.140498	0.51242	0.62264	0.600495
470065	0.31196	0.576063	0.371498	0.0877755	0.327147	0.193577	0.470814	0.440431	0.434549
44626655	0.313426	0.620708	0.395319	0.400705	0.225583	0.130482	0.687315	0.716516	0.807016
21140467	0.315924	0.425794	0.417328	0.204933	0.263409	0.0812504	0.487482	0.91691	0.614574
512717	0.317893	0.805008	0.417638	0.516699	0.272964	0.231187	0.571828	0.919885	0.821381
121486905	0.318323	0.672537	0.340505	0.307668	0.210342	0.16502	0.494489	0.694203	0.371799
512127	0.321107	0.554824	0.412408	0.232631	0.190192	0.154095	0.726891	0.700813	0.80404
71305626	0.321107	0.554824	0.412408	0.232631	0.190192	0.154095	0.726891	0.700813	0.80404
46874399	0.321107	0.554824	0.412408	0.232631	0.190192	0.154095	0.726891	0.700813	0.80404
45038620	0.321107	0.554824	0.412408	0.232631	0.190192	0.154095	0.726891	0.700813	0.80404
92233558	0.321107	0.554824	0.412408	0.232631	0.190192	0.154095	0.726891	0.700813	0.80404
10039594	0.322079	0.38809	0.343652	0.396322	0.240085	0.141657	0.490584	0.707491	0.547447
492200	0.325933	0.846105	0.449818	0.271856	0.191203	0.155457	0.348444	0.412382	0.395374
121486895	0.326328	0.707738	0.332183	0.0439993	0.303467	0.0724302	0.521418	0.735328	0.728106
3010354	0.329609	0.628522	0.481405	0.190035	0.253271	0.728876	0.506443	0.910577	0.553583
125496047	0.329949	0.566105	0.267296	0.11341	0.333007	0.254025	0.692747	0.584449	0.608662
21139599	0.330015	0.684895	0.406811	0.21158	0.219149	0.0714206	0.672172	0.66528	0.641324
7173845	0.334989	0.538403	0.406426	0.161121	0.230866	0.241939	0.526423	0.594654	0.630231
102197	0.334989	0.538403	0.406426	0.161121	0.230866	0.241939	0.526423	0.594654	0.630231
46874491	0.334989	0.538403	0.406426	0.161121	0.230866	0.241939	0.526423	0.594654	0.630231
45358303	0.334989	0.538403	0.406426	0.161121	0.230866	0.241939	0.526423	0.594654	0.630231
44629881	0.334989	0.538403	0.406426	0.161121	0.230866	0.241939	0.526423	0.594654	0.630231
45357254	0.334989	0.538403	0.406426	0.161121	0.230866	0.241939	0.526423	0.594654	0.630231
21797130	0.334989	0.538403	0.406426	0.161121	0.230866	0.241939	0.526423	0.594654	0.630231
3012227	0.337637	0.614953	0.481377	0.300293	0.27298	0.770014	0.6302	0.741571	0.706713
464373	0.338039	0.540052	0.405948	0.418873	0.217818	0.162284	0.366243	0.798193	0.664245
3061100	0.33858	0.875121	0.393212	0.1562	0.246891	0.307876	0.474269	0.408371	0.487846
50989994	0.33858	0.875121	0.393212	0.1562	0.246891	0.307876	0.474269	0.408371	0.487846
492561	0.343953	0.362929	0.384547	0.126029	0.347988	0.362675	0.548337	0.405705	0.445222
21815879	0.345448	0.391564	0.440064	0.167975	0.253945	0.277791	0.525683	0.688754	0.648943
3007217	0.349975	0.587263	0.372588	0.146579	0.246549	0.0656288	0.44676	0.927704	0.789465
21116879	0.350605	0.71257	0.406526	0.269758	0.223468	0.0426122	0.668902	0.646981	0.831407
7065210	0.350605	0.71257	0.406526	0.269758	0.223468	0.0426122	0.668902	0.646981	0.831407
93003	0.350605	0.71257	0.406526	0.269758	0.223468	0.0426122	0.668902	0.646981	0.831407
44629860	0.350605	0.71257	0.406526	0.269758	0.223468	0.0426122	0.668902	0.646981	0.831407
11098172	0.3533	0.712924	0.428578	0.269758	0.223814	0.0426122	0.6536	0.657318	0.83122
350834	0.353952	0.530768	0.417657	0.21071	0.207845	0.0587678	0.70337	0.619886	0.811999
6481604	0.354255	0.776285	0.429706	0.281801	0.240741	0.219386	0.67323	0.662806	0.701058
10565387	0.354511	0.722939	0.442602	0.274417	0.222673	0.041678	0.654964	0.653726	0.831184
10946143	0.354928	0.714033	0.437166	0.274417	0.223814	0.0426122	0.655316	0.644075	0.83146
126968624	0.354943	0.550134	0.401947	0.36741	0.221552	0.255612	0.545565	0.693903	0.661949
21854299	0.354943	0.550134	0.401947	0.36741	0.221552	0.255612	0.545565	0.693903	0.661949
130712	0.355891	0.492751	0.348584	0.278369	0.223487	0.0169172	0.48992	0.570289	0.812399
57346774	0.356336	0.52361	0.361599	0.233206	0.211305	0.0882348	0.445494	0.582342	0.829933
6478491	0.356426	0.73002	0.4391	0.426293	0.239611	0.161589	0.669932	0.605124	0.66167
456109	0.358797	0.857727	0.31043	0.140179	0.267373	0.0386272	0.299811	0.218732	0.661445
10517504	0.359973	0.719348	0.438793	0.274417	0.223814	0.0426122	0.657299	0.640545	0.831043
10380149	0.360532	0.900683	0.33547	0.188414	0.253866	0.179638	0.331199	0.549956	0.548211
121486870	0.361367	0.401964	0.317701	0.0268421	0.197285	0.0160755	0.485478	0.32114	0.661626
584362	0.363996	0.422303	0.369107	0.251653	0.163947	0.118947	0.581675	0.716759	0.789132
10686845	0.365859	0.411788	0.424818	0.349418	0.230312	0.0487364	0.489576	0.561469	0.642577
72212339	0.366376	0.49689	0.417945	0.185186	0.179697	0.125845	0.699806	0.518512	0.60926
11162398	0.368305	0.896393	0.408393	0.480939	0.244545	0.0870466	0.440283	0.599964	0.802844
10934996	0.368682	0.573728	0.397306	0.100915	0.2409	0.24434	0.588141	0.526659	0.798458
92132092	0.368682	0.573728	0.397306	0.100915	0.2409	0.24434	0.588141	0.526659	0.798458
334830	0.368682	0.573728	0.397306	0.100915	0.2409	0.24434	0.588141	0.526659	0.798458
512555	0.370087	0.571285	0.381273	0.0610535	0.223849	0.310217	0.487331	0.707421	0.8289
71431122	0.371324	0.239558	0.35919	0.152695	0.202528	0.0490639	0.551088	0.71021	0.776476
126969176	0.371324	0.239558	0.35919	0.152695	0.202528	0.0490639	0.551088	0.71021	0.776476
131887892	0.372113	0.752009	0.396509	0.371957	0.261804	0.559061	0.299043	0.625319	0.447364
131880518	0.372669	0.433564	0.38516	0.215805	0.195071	0.452135	0.567262	0.803447	0.785379
66524133	0.3732	0.0578938	0.312821	0.256038	0.219565	0.0454837	0.451443	0.39441	0.547156
163285340	0.373811	0.289651	0.426958	0.144175	0.238463	0.125536	0.583042	0.561539	0.61077
71314761	0.374547	0.612991	0.423882	0.183194	0.223086	0.094045	0.561934	0.56141	0.59178
469442	0.376477	0.633647	0.404089	0.394059	0.195577	0.11604	0.351715	0.50989	0.50403
466018	0.376511	0.785048	0.439703	0.2181	0.233576	0.245828	0.601612	0.550992	0.54377
54101611	0.377275	0.613299	0.374879	0.143445	0.282135	0.0467198	0.433574	0.356146	0.833755
10220985	0.377275	0.613299	0.374879	0.143445	0.282135	0.0467198	0.433574	0.356146	0.833755
6441200	0.377275	0.613299	0.374879	0.143445	0.282135	0.0467198	0.433574	0.356146	0.833755
14803093	0.377275	0.613299	0.374879	0.143445	0.282135	0.0467198	0.433574	0.356146	0.833755
118989478	0.377275	0.613299	0.374879	0.143445	0.282135	0.0467198	0.433574	0.356146	0.833755
54101612	0.377275	0.613299	0.374879	0.143445	0.282135	0.0467198	0.433574	0.356146	0.833755
129653012	0.377481	0.13616	0.333782	0.033302	0.205367	0.146404	0.605383	0.602437	0.725012
94480465	0.379017	0.563349	0.400188	0.340872	0.205554	0.151756	0.445001	0.745267	0.657021
9882803	0.379017	0.563349	0.400188	0.340872	0.205554	0.151756	0.445001	0.745267	0.657021
10471224	0.381929	0.685045	0.375726	0.260345	0.224952	0.0636652	0.392699	0.841213	0.813564
72201	0.383034	0.839715	0.403885	0.23965	0.244488	0.681764	0.253931	0.644217	0.420984
14485380	0.383034	0.839715	0.403885	0.23965	0.244488	0.681764	0.253931	0.644217	0.420984
100327	0.383371	0.749552	0.376598	0.184366	0.233948	0.0847179	0.545538	0.537044	0.813722
324309	0.383371	0.749552	0.376598	0.184366	0.233948	0.0847179	0.545538	0.537044	0.813722
5273014	0.384665	0.806568	0.365679	0.037013	0.235253	0.124585	0.458498	0.328645	0.760507
13072932	0.386549	0.274439	0.378793	0.138744	0.239353	0.118457	0.587143	0.590731	0.616112
40468020	0.386549	0.274439	0.378793	0.138744	0.239353	0.118457	0.587143	0.590731	0.616112
68197667	0.386549	0.274439	0.378793	0.138744	0.239353	0.118457	0.587143	0.590731	0.616112
42553747	0.386549	0.274439	0.378793	0.138744	0.239353	0.118457	0.587143	0.590731	0.616112
54669720	0.386549	0.274439	0.378793	0.138744	0.239353	0.118457	0.587143	0.590731	0.616112
16129586	0.386549	0.274439	0.378793	0.138744	0.239353	0.118457	0.587143	0.590731	0.616112
53869019	0.386549	0.274439	0.378793	0.138744	0.239353	0.118457	0.587143	0.590731	0.616112
3367	0.386549	0.274439	0.378793	0.138744	0.239353	0.118457	0.587143	0.590731	0.616112
13072931	0.386549	0.274439	0.378793	0.138744	0.239353	0.118457	0.587143	0.590731	0.616112
8975	0.386549	0.274439	#N/A	0.138744	#N/A	0.118457	0.587143	0.590731	0.616112
44629914	0.386549	0.274439	0.378793	0.138744	0.239353	0.118457	0.587143	0.590731	0.616112
154716223	0.386549	0.274439	0.387145	0.138744	0.239353	0.118457	0.583042	0.592274	0.616112
46705411	0.386549	0.274439	0.378793	0.138744	0.239353	0.118457	0.587143	0.590731	0.616112
45039261	0.386549	0.274439	0.378793	0.138744	0.239353	0.118457	0.587143	0.590731	0.616112
503813	0.386846	0.688188	0.36115	0.118707	0.260692	0.194074	0.493747	0.504608	0.4879
131881042	0.389344	0.499936	0.41459	0.396035	0.179749	0.241144	0.462904	0.42838	0.583633
470053	0.390133	0.912685	0.444502	0.225283	0.251514	0.156854	0.63137	0.322715	0.51611
10946114	0.390469	0.622872	0.348351	0.237404	0.195417	0.0488172	0.556913	0.600654	0.71437
134229959	0.390491	0.263062	0.422868	0.210613	0.266913	0.542374	0.723138	0.901586	0.807913
7043952	0.391535	0.67823	0.38796	0.0681322	0.264976	0.0923804	0.680607	0.359386	0.841827
6595184	0.391535	0.67823	0.38796	0.0681322	0.264976	0.0923804	0.680607	0.359386	0.841827
355280	0.391768	0.559625	0.421514	0.106651	0.24761	0.12482	0.488996	0.485005	0.859849
121487874	0.392346	0.912559	0.431978	0.0260295	0.264884	0.307001	0.44472	0.702356	0.800748
128771	0.392692	0.446644	0.365937	0.133309	0.154771	0.116961	0.563267	0.526368	0.625517
15926748	0.393459	0.430835	0.382658	0.151751	0.220672	0.143788	0.559954	0.505376	0.492748
15926749	0.393459	0.430835	0.382658	0.151751	0.220672	0.143788	0.559954	0.505376	0.492748
71341063	0.394348	0.454146	0.386625	0.240791	0.243571	0.141108	0.404335	0.636883	0.816398
10356486	0.394348	0.454146	0.386625	0.240791	0.243571	0.141108	0.404335	0.636883	0.816398
10265867	0.394348	0.454146	0.386625	0.240791	0.243571	0.141108	0.404335	0.636883	0.816398
67785972	0.394348	0.454146	0.386625	0.240791	0.243571	0.141108	0.404335	0.636883	0.816398
481530	0.395175	0.773024	0.38839	0.307085	0.255852	0.0873457	0.309937	0.867932	0.521074
121487869	0.395368	0.878526	0.41734	0.380037	0.311615	0.341795	0.525081	0.794942	0.654348
511720	0.398661	0.713899	0.448036	0.169666	0.340536	0.257915	0.587447	0.594075	0.669136
11808175	0.399292	0.658558	0.348817	0.0171237	0.24786	0.0338777	0.446123	0.29291	0.850978
98140	0.399292	0.658558	0.348817	0.0171237	0.24786	0.0338777	0.446123	0.29291	0.850978
11832914	0.399292	0.658558	0.348817	0.0171237	0.24786	0.0338777	0.446123	0.29291	0.850978
482505	0.399292	0.658558	0.348817	#N/A	0.24786	0.0338777	0.446123	0.29291	0.850978
11087275	0.399292	0.658558	0.348817	0.0171237	0.24786	0.0338777	0.446123	0.29291	0.850978
504751	0.399625	0.689105	0.430368	0.296756	0.325339	0.083126	0.507116	0.901196	0.709486
92236361	0.40014	0.379742	0.3804	0.211584	0.312796	0.0493117	0.536905	0.526668	0.737365
490627	0.402282	0.461997	0.386202	0.470336	0.24588	0.184023	0.61869	0.733306	0.680281
512128	0.402615	0.816795	0.425009	0.117328	0.214568	0.0604387	0.503839	0.688578	0.859731
94001662	0.402941	0.533698	0.363151	0.181935	0.200509	0.087272	0.511162	0.644924	0.800913
91810866	0.402941	0.533698	0.363151	0.181935	0.200509	0.087272	0.511162	0.644924	0.800913
13108018	0.402941	0.533698	0.363151	0.181935	0.200509	0.087272	0.511162	0.644924	0.800913
24206417	0.402941	0.533698	0.363151	0.181935	0.200509	0.087272	0.511162	0.644924	0.800913
134695307	0.402941	0.533698	0.363151	0.181935	0.200509	0.087272	0.511162	0.644924	0.800913
1268279	0.402941	0.533698	0.363151	0.181935	0.200509	0.087272	0.511162	0.644924	0.800913
5327118	0.402941	0.533698	0.363151	0.181935	0.200509	0.087272	0.511162	0.644924	0.800913
13463	0.402941	0.533698	0.363151	0.181935	0.200509	0.087272	0.511162	0.644924	0.800913
131852786	0.404712	0.417008	0.420019	0.117386	0.210952	0.10816	0.586148	0.607967	0.586446
53908939	0.404966	0.242173	0.347453	0.0525024	0.195941	0.266636	0.443126	0.410678	0.744834
6479249	0.405917	0.209508	0.38729	0.22461	0.290816	0.068761	0.36969	0.0840009	0.434516
131858702	0.406423	0.554447	0.401712	0.404065	0.336463	0.295172	0.275421	0.942004	0.843631
484807	0.406566	0.694647	0.422526	0.289051	0.241506	0.59986	0.389941	0.941074	0.821811
472636	0.406831	0.642501	0.391568	0.0969709	0.220085	0.126401	0.78348	0.72513	0.692044
260138	0.407578	0.299348	0.365103	0.154608	0.268066	0.205333	0.58952	0.563192	0.775207
121217040	0.407578	0.299348	0.365103	0.154608	0.268066	0.205333	0.58952	0.563192	0.775207
126916	0.407859	0.488288	0.393429	0.084563	0.223705	0.150373	0.47933	0.429496	0.647131
490444	0.410332	0.0367586	0.348472	0.0886506	0.244264	0.0856121	0.615583	0.552155	0.790739
512679	0.410639	0.671779	0.419861	0.168225	0.247897	0.352251	0.414237	0.666123	0.680914
273017	0.410927	0.538794	0.395297	0.131596	0.252074	0.246525	0.435355	0.483075	0.597143
21121551	0.411821	0.0935442	0.397705	0.0766589	0.309056	0.0678227	0.470942	0.864492	0.828714
138114911	0.412878	0.678566	0.384997	0.314103	0.265073	0.0900003	0.489642	0.934975	0.542547
6483431	0.412878	0.678566	0.384997	0.314103	0.265073	0.0900003	0.489642	0.934975	0.542547
11243974	0.415106	0.502292	0.421752	0.149945	0.226608	0.188652	0.553411	0.523292	0.620017
12907243	0.415326	0.433731	0.370954	0.109753	0.248988	0.074163	0.117845	0.031823	0.559657
47751	0.415326	0.433731	0.370954	0.109753	0.248988	0.074163	0.117845	0.031823	0.559657
134714751	0.415326	0.433731	0.370954	0.109753	0.248988	0.074163	0.117845	0.031823	0.559657
1265902	0.415326	0.433731	0.370954	0.109753	0.248988	0.074163	0.117845	0.031823	0.559657
44629846	0.415326	0.433731	0.370954	0.109753	0.248988	0.074163	0.117845	0.031823	0.559657
45357134	0.415326	0.433731	0.370954	0.109753	0.248988	0.074163	0.117845	0.031823	0.559657
121487870	0.415419	0.887934	0.431951	0.367545	0.320426	0.356166	0.593677	0.707366	0.684553
13989347	0.416181	0.212603	0.382264	0.280804	0.239777	0.0817345	0.57211	0.615861	0.575741
57368267	0.416181	0.212603	0.382264	0.280804	0.239777	0.0817345	0.57211	0.615861	0.575741
464374	0.416707	0.546017	0.418582	0.41307	0.199862	0.224751	0.457851	0.493445	0.644055
7458588	0.417049	0.514461	0.385026	0.0740992	0.259036	0.278337	0.603099	0.45287	0.666569
7058183	0.417049	0.514461	0.385026	0.0740992	0.259036	0.278337	0.603099	0.45287	0.666569
22861745	0.417106	0.0678562	0.437401	0.0367261	0.143009	0.0168263	0.664045	0.148446	0.557391
490440	0.41722	0.172426	0.291888	0.037302	0.220014	0.101006	0.56015	0.553435	0.806562
9925859	0.417492	0.623858	0.383101	0.153631	0.267829	0.084728	0.386164	0.234311	0.821967
102381544	0.417767	0.242695	0.417095	0.283923	0.207652	0.310623	0.655036	0.966913	0.817706
68742335	0.418629	0.227125	0.369242	0.133046	0.230077	0.0744341	0.570352	0.530072	0.574906
11173824	0.419396	0.531032	0.415172	0.346778	0.282822	0.316808	0.4778	0.9354	0.854221
92237060	0.41952	0.635439	0.395794	0.541616	0.235639	0.194628	0.704221	0.891069	0.824177
97453	0.41952	0.635439	0.395794	0.541616	0.235639	0.194628	0.704221	0.891069	0.824177
5494430	0.419769	0.720482	0.390919	0.0811413	0.215151	0.260025	0.402818	0.435115	0.637822
393545	0.419792	0.04814	0.436903	0.11826	0.157262	0.00887031	0.656156	0.162775	0.608698
69527463	0.420174	0.890621	0.379858	0.278531	0.261025	0.116165	0.533292	0.573942	0.784852
504749	0.421267	0.279887	0.443299	0.440961	0.207311	0.659655	0.574846	0.811677	0.641568
92301827	0.42233	0.572374	0.405844	0.0883641	0.266285	0.276115	0.475507	0.710037	0.855214
6482628	0.42233	0.572374	0.405844	0.0883641	0.266285	0.276115	0.475507	0.710037	0.855214
49784135	0.422824	0.371607	0.398221	0.340245	0.228161	0.254528	0.696706	0.962013	0.831267
472638	0.423305	0.398779	0.418098	0.0880242	0.284409	0.248829	0.310617	0.946707	0.864647
472656	0.423305	0.398779	0.418098	0.0880242	0.284409	0.248829	0.310617	0.946707	0.864647
10588022	0.423513	0.462648	0.357819	0.106297	0.250539	0.0334724	0.344877	0.357172	0.744791
10588021	0.423513	0.462648	0.357819	0.106297	0.250539	0.0334724	0.344877	0.357172	0.744791
3011898	0.424223	0.473449	0.398367	0.40877	0.224533	0.141488	0.566093	0.865529	0.808193
21821295	0.42626	0.264205	0.400951	0.0949706	0.192323	0.640316	0.53819	0.498775	0.662373
3012586	0.426426	0.72429	0.431058	0.0772503	0.332731	0.457912	0.59533	0.415255	0.537123
121486770	0.42657	0.343148	0.362763	0.0531908	0.337339	0.154202	0.430632	0.847291	0.808143
131883271	0.426603	0.678827	0.46407	0.319079	0.271808	0.204962	0.267837	0.692631	0.71682
57116127	0.426832	0.463594	0.381157	0.199019	0.236441	0.0313446	0.0789913	0.0163341	0.574368
6976932	0.426832	0.463594	0.381157	0.199019	0.236441	0.0313446	0.0789913	0.0163341	0.574368
27556867	0.426832	0.463594	0.381157	0.199019	0.236441	0.0313446	0.0789913	0.0163341	0.574368
15607330	0.426832	0.463594	0.381157	0.199019	0.236441	0.0313446	0.0789913	0.0163341	0.574368
100551	0.42789	0.500318	0.358258	0.0201783	0.249829	0.045297	0.193311	0.0388823	0.495433
466022	0.428607	0.757248	0.454963	0.219356	0.285231	0.178604	0.173134	0.559892	0.638014
10850803	0.430838	0.5376	0.389319	0.181935	0.205717	0.0837382	0.501438	0.648821	0.806987
12939902	0.431541	0.576346	0.41788	0.0918165	0.300264	0.355698	0.653328	0.646512	0.816944
12939901	0.431541	0.576346	0.41788	0.0918165	0.300264	0.355698	0.653328	0.646512	0.816944
2777912	0.431541	0.576346	0.41788	0.0918165	0.300264	0.355698	0.653328	0.646512	0.816944
44283163	0.431541	0.576346	0.41788	0.0918165	0.300264	0.355698	0.653328	0.646512	0.816944
46783463	0.431541	0.576346	0.41788	0.0918165	0.300264	0.355698	0.653328	0.646512	0.816944
96544	0.431541	0.576346	0.41788	0.0918165	0.300264	0.355698	0.653328	0.646512	0.816944
10521478	0.431541	0.576346	0.41788	0.0918165	0.300264	0.355698	0.653328	0.646512	0.816944
7070208	0.431541	0.576346	0.41788	0.0918165	0.300264	0.355698	0.653328	0.646512	0.816944
688019	0.431541	0.576346	0.41788	0.0918165	0.300264	0.355698	0.653328	0.646512	0.816944
90673794	0.431705	0.317344	0.422848	0.113753	0.268769	0.362747	0.33704	0.636454	0.575733
299952	0.432618	0.551872	0.419428	0.172839	0.232143	0.468359	0.118539	0.5989	0.54042
481082	0.433504	0.495595	0.390437	0.0521426	0.245485	0.103267	0.519268	0.520511	0.838683
10108316	0.433625	0.239161	0.404227	0.188804	0.256218	0.359049	0.746581	0.947591	0.830128
6480510	0.433717	0.169335	0.396367	0.130114	0.193573	0.26969	0.756045	0.521846	0.821101
490628	0.433761	0.675689	0.42168	0.460879	0.222716	0.195826	0.560879	0.714342	0.65173
196788	0.433822	0.223549	0.370799	0.164918	0.251105	0.0232641	0.417079	0.833923	0.812508
87824325	0.434172	0.291088	0.350345	0.0467161	0.205292	0.0466641	0.182672	0.860357	0.523607
5272658	0.434289	0.862464	0.433313	0.226878	0.194722	0.125153	0.598811	0.68358	0.658908
5273749	0.436044	0.717421	0.350753	0.212992	0.248814	0.182095	0.168079	0.0339598	0.599395
5271377	0.436044	0.717421	0.350753	0.212992	0.248814	0.182095	0.168079	0.0339598	0.599395
3009937	0.436197	0.281457	0.433747	0.263052	0.352342	0.192517	0.58865	0.923077	0.808503
5271782	0.437426	0.101051	0.355754	0.126184	0.226447	0.0430057	0.604099	0.686736	0.631314
73351959	0.438876	0.824261	0.395194	0.313172	0.325217	0.366515	0.330905	0.909789	0.836319
155889717	0.439094	0.415456	0.336403	0.16845	0.223401	0.384368	0.233664	0.0444887	0.509869
154706402	0.439094	0.415456	0.336403	0.16845	0.223401	0.384368	0.233664	0.0444887	0.509869
5272659	0.439375	0.680954	0.428046	0.146294	0.181008	0.132327	0.666185	0.671964	0.665756
76973629	0.439445	0.445128	0.43185	0.109753	0.254868	0.0919064	0.117007	0.0431366	0.562601
92021270	0.439606	0.437346	0.424932	0.423571	0.253747	0.441736	0.642317	0.935458	0.836112
44633776	0.439606	0.437346	0.424932	0.423571	0.253747	0.441736	0.642317	0.935458	0.836112
3007216	0.440722	0.150902	0.390521	0.335567	0.227568	0.269983	0.518496	0.934286	0.787066
472657	0.441283	0.330417	0.426707	0.068228	0.242134	0.169849	0.350886	0.692883	0.850903
472639	0.441283	0.330417	0.426707	0.068228	0.242134	0.169849	0.350886	0.692883	0.850903
162653200	0.44163	0.810405	0.368941	#N/A	0.242834	0.0253627	0.138209	0.046263	0.393513
447199	0.441638	0.634283	0.406177	0.0641366	0.211116	0.0508675	0.480391	0.27031	0.859352
10831407	0.441938	0.63129	0.427942	0.195441	0.295307	0.284065	0.502131	0.68375	0.686497
131858477	0.442092	0.496878	0.395108	0.212025	0.375033	0.369589	0.299399	0.922232	0.848133
131875471	0.442576	0.565609	0.369311	0.12737	0.248373	0.0142443	0.051741	0.0289452	0.429387
91150325	0.442711	0.624595	0.364791	0.364245	0.210573	0.0690266	0.60577	0.796267	0.790237
6913230	0.442798	0.59822	0.415175	0.169439	0.408512	0.277588	0.386978	0.464863	0.755078
3363163	0.442798	0.59822	0.415175	0.169439	0.408512	0.277588	0.386978	0.464863	0.755078
503811	0.443066	0.456361	0.342186	0.0474723	0.21931	0.32829	0.400066	0.503428	0.460005
459942	0.443433	0.259385	0.392709	0.123759	0.227464	0.235458	0.502279	0.350898	0.63279
247678	0.444122	0.133775	0.303982	0.00984142	0.189319	0.316207	0.387341	0.762818	0.591959
10265835	0.444411	0.451009	0.381084	0.154675	0.24621	0.205433	0.645002	0.563219	0.839752
11119839	0.444457	0.323492	0.407488	0.13986	0.239078	0.234688	0.567685	0.945305	0.683913
87150598	0.444737	0.294973	0.411911	0.170172	0.233671	0.0637961	0.426818	0.734325	0.665667
70610597	0.444938	0.576467	0.357844	0.0804652	0.227497	0.00819984	0.0808944	0.0210122	0.411534
643968	0.444938	0.576467	0.357844	0.0804652	0.227497	0.00819984	0.0808944	0.0210122	0.411534
5702211	0.444938	0.576467	0.357844	#N/A	0.227497	0.00819984	0.0808944	0.0210122	0.411534
13071731	0.444938	0.576467	0.357844	0.0804652	0.227497	0.00819984	0.0808944	0.0210122	0.411534
43834572	0.444938	0.576467	0.357844	0.0804652	0.227497	0.00819984	0.0808944	0.0210122	0.411534
853012	0.444938	0.576467	0.357844	0.0804652	0.227497	0.00819984	0.0808944	0.0210122	0.411534
450214	0.444938	0.576467	0.369355	0.0804652	0.228827	0.00888994	0.0776542	0.0228917	0.411534
9881867	0.445243	0.237792	0.368611	0.0873036	0.229244	0.185048	0.492325	0.576862	0.452527
10716626	0.445748	0.849722	0.446708	0.435182	0.322092	0.121849	0.559879	0.817263	0.715714
154701264	0.446109	0.523022	0.400061	0.554375	0.198428	0.17658	0.537973	0.872849	0.657933
14237950	0.446265	0.628462	0.412483	0.146083	0.346466	0.526319	0.442158	0.518091	0.693546
6426626	0.446265	0.628462	0.412483	0.146083	0.346466	0.526319	0.442158	0.518091	0.693546
23757287	0.44633	0.479308	0.37157	0.0448165	0.196551	0.0212478	0.252625	0.826591	0.531327
92262645	0.446357	0.411644	0.439588	0.163072	0.3046	0.443022	0.719966	0.790781	0.923971
131858479	0.446357	0.411644	0.439588	0.163072	0.3046	0.443022	0.719966	0.790781	0.923971
160418	0.446594	0.879617	0.437854	0.184352	0.280682	0.109442	0.515127	0.478531	0.563975
23518344	0.44695	0.385381	0.436308	0.122577	0.282913	0.300019	0.630006	0.69172	0.80779
118796809	0.447338	0.811749	0.476905	0.17838	0.295293	0.91205	0.719328	0.951818	0.843937
128557	0.447921	0.270207	0.399861	0.30823	0.193149	0.10023	0.562923	0.413834	0.65175
88101259	0.448368	0.772752	0.352192	0.0344867	0.346938	0.139543	0.213333	0.814424	0.659053
452091	0.449131	0.255563	0.350342	0.121026	0.20348	0.179855	0.530948	0.427366	0.503545
58478862	0.449131	0.568636	0.362324	0.275373	0.235303	0.123628	0.365042	0.426813	0.583302
472655	0.449555	0.483677	0.410994	0.0748022	0.225218	0.323349	0.516417	0.705409	0.836295
49791785	0.449555	0.483677	0.410994	0.0748022	0.225218	0.323349	0.516417	0.705409	0.836295
472632	0.449555	0.483677	0.410994	0.0748022	0.225218	0.323349	0.516417	0.705409	0.836295
9994200	0.449672	0.51464	0.361333	0.257578	0.234137	0.202069	0.483253	0.518689	0.573229
22316435	0.449672	0.51464	0.361333	0.257578	0.234137	0.202069	0.483253	0.518689	0.573229
15677395	0.449672	0.51464	0.361333	0.257578	0.234137	0.202069	0.483253	0.518689	0.573229
76974063	0.450003	0.450954	0.450213	0.109753	0.261488	0.0855457	0.12015	0.0458441	0.559954
92228414	0.450829	0.234561	0.386748	0.0813144	0.224464	0.0721855	0.604469	0.924962	0.821844
11824	0.450829	0.234561	0.386748	0.0813144	0.224464	0.0721855	0.604469	0.924962	0.821844
512290	0.450829	0.234561	0.386748	0.0813144	0.224464	0.0721855	0.604469	0.924962	0.821844
247955	0.450829	0.234561	#N/A	0.0813144	0.224464	0.0721855	0.604469	0.924962	0.821844
70587122	0.451705	0.364809	0.406379	0.120304	0.262532	0.215619	0.470705	0.648038	0.829121
54571321	0.451906	0.114336	0.425817	0.079083	0.153421	0.0203997	0.556301	0.0597392	0.44641
129009617	0.452682	0.476965	0.460972	0.109753	0.250007	0.0788314	0.0959785	0.036774	0.552883
451908	0.453529	0.412624	0.356477	0.0302656	0.181002	0.366198	0.628943	0.62431	0.804801
76973399	0.454263	0.482939	0.449523	0.109753	0.250007	0.07584	0.0948043	0.0378195	0.559336
11779021	0.45476	0.674532	0.411437	#N/A	0.261662	0.171505	0.449073	0.915714	0.850575
490621	0.455172	0.303657	0.377047	0.303738	0.235614	0.167665	0.520584	0.737847	0.634495
490623	0.455172	0.303657	0.377047	0.303738	0.235614	0.167665	0.520584	0.737847	0.634495
131881813	0.455392	0.262156	0.439078	0.240699	0.366665	0.375662	0.718056	0.80626	0.835054
194101	0.456361	0.305414	0.438153	0.117963	0.35742	0.266338	0.783297	0.786081	0.834515
73442717	0.456821	0.586402	0.418823	0.16196	0.282353	0.228374	0.546656	0.633553	0.657194
92230799	0.456821	0.586402	0.418823	0.16196	0.282353	0.228374	0.546656	0.633553	0.657194
494271	0.457297	0.342811	0.404028	0.0505557	0.205339	0.0433775	0.537762	0.398444	0.861359
89858725	0.457299	0.643154	0.443212	0.276317	0.338521	0.360598	0.387398	0.329827	0.732147
447864	0.457625	0.477725	0.357451	0.296149	0.239109	0.123152	0.501266	0.632788	0.493582
69626062	0.457625	0.477725	0.357451	0.296149	0.239109	0.123152	0.501266	0.632788	0.493582
489877	0.457954	0.394514	0.402183	0.223374	0.225319	0.0338266	0.694991	0.529647	0.852622
1468	0.45813	0.0938938	0.344955	0.207145	0.245892	0.286733	0.690509	0.413857	0.799548
131708761	0.458504	0.640236	0.465595	0.132352	0.255879	0.963554	0.702975	0.934541	0.768874
10446782	0.459505	0.796802	0.391954	0.280088	0.216366	0.250166	0.592625	0.708942	0.784106
310052	0.459567	0.61481	0.450749	0.114587	0.140186	0.430045	0.579492	0.364974	0.54158
15612856	0.459567	0.61481	0.450749	0.114587	0.140186	0.430045	0.579492	0.364974	0.54158
5272657	0.459585	0.812632	0.424869	0.152419	0.180221	0.134449	0.5719	0.456338	0.68426
9948218	0.45982	0.140824	0.393711	0.209294	0.234463	0.0517074	0.458632	0.69387	0.613811
71832128	0.460512	0.320836	0.373852	0.192523	0.339937	0.318884	0.387891	0.504918	0.586562
42553032	0.460512	0.320836	0.373852	0.192523	0.339937	0.318884	0.387891	0.504918	0.586562
42553033	0.460512	0.320836	0.373852	0.192523	0.339937	0.318884	0.387891	0.504918	0.586562
3011901	0.460676	0.14811	0.397677	0.0863004	0.239993	0.14665	0.406381	0.93836	0.800624
6450904	0.460697	0.424924	0.447952	0.472227	0.286036	0.271033	0.540241	0.913891	0.829998
50989698	0.460697	0.424924	0.447952	0.472227	0.286036	0.271033	0.540241	0.913891	0.829998
360644	0.461831	0.485822	0.407716	0.184112	0.248707	0.237253	0.484736	0.323659	0.842182
21592214	0.462321	0.385	0.379122	0.213913	0.255445	0.0345805	0.274551	0.752275	0.579452
481083	0.462386	0.469192	0.366496	0.299269	0.252791	0.209875	0.416778	0.568111	0.832679
481081	0.462386	0.469192	0.366496	0.299269	0.252791	0.209875	0.416778	0.568111	0.832679
484808	0.462812	0.697343	0.410412	0.238778	0.258755	0.232785	0.444969	0.921509	0.854192
469861	0.46291	0.675822	0.475285	0.147881	0.407064	0.783177	0.688035	0.34021	0.556538
6479208	0.463281	0.173874	0.400799	0.264932	0.310773	0.0862413	0.429658	0.182388	0.457121
101670692	0.463326	0.725346	0.322775	0.158186	0.193365	0.283807	0.149129	0.0442519	0.475695
131880742	0.463872	0.608174	0.383956	0.159365	0.341745	0.257234	0.43406	0.582502	0.667762
15410716	0.46393	0.329866	0.300153	0.0765179	0.215975	0.225414	0.611018	0.829313	0.406523
512680	0.464035	0.274495	0.409875	0.0863908	0.236282	0.323819	0.518636	0.778344	0.632422
72501	0.464694	0.195943	0.39021	0.113601	0.197983	0.198362	0.6578	0.537128	0.67736
121487433	0.464965	0.543401	0.446194	0.0244082	0.257439	0.0412171	0.130356	0.0733958	0.298153
3011924	0.466927	0.185828	0.377934	0.249061	0.27933	0.352477	0.380044	0.946043	0.79582
21829243	0.467247	0.284212	0.374299	0.302335	0.268095	0.495984	0.658929	0.895825	0.855546
14410899	0.467333	0.734106	0.408045	0.0964365	0.142449	0.313381	0.60625	0.537972	0.535076
512286	0.467342	0.305398	0.393355	0.0877286	0.271259	0.597443	0.468463	0.647685	0.660067
516040	0.467403	0.267662	0.42354	0.0950589	0.1487	0.228114	0.428633	0.644914	0.450297
395997	0.468498	0.130896	0.39251	0.0810924	0.262892	0.0746104	0.724253	0.317692	0.884511
457015	0.468697	0.0949021	0.331149	0.141902	0.241687	0.129992	0.482274	0.413545	0.579412
10067373	0.469512	0.888113	0.405868	0.344769	0.319042	0.271702	0.472621	0.662414	0.493347
10469813	0.469571	0.445816	0.434015	0.155682	0.207923	0.136163	0.478253	0.536655	0.651889
11737492	0.469886	0.575766	0.402001	0.0793071	0.219172	0.179437	0.689918	0.658545	0.864517
161470	0.469969	0.495296	0.3859	0.274969	0.229629	0.0533683	0.688859	0.254893	0.818401
455227	0.470077	0.922772	0.352552	0.185803	0.281051	0.405606	0.1422	0.518263	0.37207
92236337	0.470788	0.338975	0.36117	0.25129	0.25258	0.289695	0.644194	0.914546	0.854792
3006170	0.470788	0.338975	0.36117	0.25129	0.25258	0.289695	0.644194	0.914546	0.854792
92271256	0.471037	0.265098	0.365654	0.120506	0.286357	0.170939	0.538672	0.920737	0.849028
10357410	0.471064	0.738504	0.401009	0.404212	0.227025	0.208543	0.408766	0.530964	0.494566
10660621	0.471491	0.491511	0.365745	0.180724	0.264015	0.324816	0.251559	0.234852	0.671831
3011899	0.471527	0.491948	0.398515	0.555677	0.28676	0.232272	0.589602	0.884198	0.812299
14630157	0.47251	0.786205	0.385174	0.238707	0.153241	0.145427	0.497285	0.512892	0.534253
131853716	0.472532	0.452721	0.392419	0.114513	0.255511	0.0401386	0.318584	0.597487	0.825042
6475236	0.473428	0.453268	0.416684	0.198779	0.288967	0.360623	0.649845	0.830827	0.797182
472814	0.473428	0.453268	0.416684	0.198779	0.288967	0.360623	0.649845	0.830827	0.797182
490625	0.473435	0.658162	0.375615	0.137336	0.25345	0.165794	0.63837	0.443594	0.678679
504747	0.473821	0.652778	0.454101	0.36923	0.313387	0.128849	0.574616	0.849206	0.746221
23545530	0.474044	0.88636	0.391164	0.104008	0.24592	0.105553	0.244837	0.498834	0.429647
44400589	0.47418	0.634062	0.456581	0.132352	0.255193	0.968662	0.704416	0.935319	0.762964
71262374	0.47418	0.634062	0.456581	0.132352	0.255193	0.968662	0.704416	0.935319	0.762964
5273019	0.474522	0.148849	0.355272	0.0523333	0.180337	0.00628394	0.0963238	0.0363818	0.436368
72212335	0.474727	0.770165	0.38804	0.253499	0.176636	0.165768	0.511726	0.741532	0.713351
14159235	0.474727	0.770165	0.38804	0.253499	0.176636	0.165768	0.511726	0.741532	0.713351
121486876	0.476194	0.22189	0.396979	0.288249	0.337033	0.689323	0.545931	0.86137	0.677013
387981	0.476453	0.234933	0.359331	0.523302	0.199115	0.0522072	0.433586	0.627518	0.555543
10266777	0.476453	0.234933	0.359331	0.523302	0.199115	0.0522072	0.433586	0.627518	0.555543
21157833	0.476663	0.468196	0.363883	0.226006	0.237952	0.110052	0.615724	0.885221	0.847526
454925	0.476798	0.776288	0.388652	0.0384547	0.320676	0.713017	0.311046	0.540359	0.439276
93476651	0.477607	0.461204	0.430675	0.18412	0.252561	0.236751	0.48328	0.866149	0.877268
10019125	0.477607	0.461204	0.430675	0.18412	0.252561	0.236751	0.48328	0.866149	0.877268
3011897	0.477729	0.25934	0.391964	0.42191	0.227722	0.162906	0.531385	0.783821	0.804852
513632	0.477968	0.622563	0.464236	0.173003	0.396015	0.82578	0.616737	0.58324	0.658347
23616027	0.47803	0.315684	0.397562	0.288298	0.222031	0.120299	0.720803	0.530736	0.818973
44330586	0.47803	0.315684	0.397562	0.288298	0.222031	0.120299	0.720803	0.530736	0.818973
92209904	0.47803	0.315684	0.397562	0.288298	0.222031	0.120299	0.720803	0.530736	0.818973
21776949	0.47803	0.315684	0.397562	0.288298	0.222031	0.120299	0.720803	0.530736	0.818973
6245	0.47803	0.315684	#N/A	0.288298	#N/A	0.120299	0.720803	0.530736	0.818973
3007918	0.47803	0.315684	0.397562	0.288298	0.222031	0.120299	0.720803	0.530736	0.818973
92209902	0.47803	0.315684	0.397562	0.288298	0.222031	0.120299	0.720803	0.530736	0.818973
92846012	0.47803	0.315684	0.397562	0.288298	0.222031	0.120299	0.720803	0.530736	0.818973
9862222	0.478077	0.0996463	0.349314	0.146126	0.295505	0.221903	0.743997	0.957066	0.789999
121578	0.478268	0.39798	0.378418	0.108249	0.234917	0.257194	0.374499	0.506384	0.815903
131855105	0.478511	0.542917	0.446501	0.175888	0.234096	0.270677	0.575536	0.584166	0.729294
131881061	0.478532	0.337889	0.421554	0.211867	0.328965	0.183788	0.666703	0.913752	0.92923
3067878	0.478558	0.902597	0.419455	0.143947	0.175944	0.251432	0.513984	0.397835	0.487728
513636	0.478611	0.676547	0.473323	0.283739	0.399323	0.676524	0.651841	0.573452	0.574411
9796412	0.478625	0.631739	0.389902	0.164455	0.239517	0.0780928	0.31342	0.460901	0.585709
13566110	0.479093	0.7634	0.460187	0.24009	0.248742	0.0250808	0.203457	0.0955699	0.404078
42552658	0.4792	0.366193	0.387593	0.320724	0.376011	0.186516	0.399213	0.57285	0.578712
42552656	0.4792	0.366193	0.387593	0.320724	0.376011	0.186516	0.399213	0.57285	0.578712
11277569	0.479329	0.347392	0.382616	0.38108	0.224694	0.183198	0.702943	0.755267	0.818948
13922191	0.479883	0.808216	0.395473	0.167898	0.238842	0.0247345	0.134206	0.0421366	0.411868
29978508	0.479883	0.808216	0.395473	0.167898	0.238842	0.0247345	0.134206	0.0421366	0.411868
117810735	0.479883	0.808216	0.395473	0.167898	0.238842	0.0247345	0.134206	0.0421366	0.411868
92977577	0.479883	0.808216	0.395473	0.167898	0.238842	0.0247345	0.134206	0.0421366	0.411868
13922189	0.479883	0.808216	0.395473	0.167898	0.238842	0.0247345	0.134206	0.0421366	0.411868
9871558	0.479883	0.808216	0.395473	0.167898	0.238842	0.0247345	0.134206	0.0421366	0.411868
10859911	0.480178	0.6082	0.41542	0.0333449	0.274732	0.0891871	0.49774	0.453364	0.682426
97186	0.480603	0.644176	0.402157	0.538947	0.301334	0.515149	0.682714	0.894587	0.827361
46875292	0.480603	0.644176	0.402157	0.538947	0.301334	0.515149	0.682714	0.894587	0.827361
9881866	0.48093	0.145376	0.317876	0.312039	0.223058	0.0888363	0.481901	0.511889	0.530417
280444	0.48093	0.145376	0.317876	0.312039	0.223058	0.0888363	0.481901	0.511889	0.530417
189898	0.480972	0.274448	0.415865	0.098867	0.251012	0.466738	0.696451	0.714898	0.809844
167821	0.481161	0.407927	0.424697	0.025723	0.307724	0.0743182	0.576002	0.79599	0.84166
44629858	0.481174	0.290355	0.309541	0.0778894	0.274371	0.0444432	0.161072	0.0187414	0.42895
7048664	0.481174	0.290355	0.309541	0.0778894	0.274371	0.0444432	0.161072	0.0187414	0.42895
124507746	0.481174	0.290355	0.309541	0.0778894	0.274371	0.0444432	0.161072	0.0187414	0.42895
133688189	0.481174	0.290355	0.309541	0.0778894	0.274371	0.0444432	0.161072	0.0187414	0.42895
688477	0.481174	0.290355	0.309541	0.0778894	0.274371	0.0444432	0.161072	0.0187414	0.42895
17571993	0.481174	0.290355	0.309541	0.0778894	0.274371	0.0444432	0.161072	0.0187414	0.42895
136260503	0.481267	0.78152	0.436664	0.334576	0.323138	0.144189	0.389007	0.945142	0.814437
11758878	0.481817	0.755193	0.384206	0.337501	0.218133	0.144926	0.411564	0.513309	0.571204
6482630	0.481915	0.396765	0.397476	0.0348296	0.237754	0.0896409	0.570459	0.604862	0.831631
193188	0.482078	0.423405	0.380136	0.209747	0.243471	0.153971	0.659606	0.482353	0.623678
490353	0.482179	0.335987	0.386722	0.197223	0.242004	0.00926295	0.491048	0.333838	0.809456
491674	0.48267	0.740775	0.364205	0.253068	0.193199	0.47138	0.318289	0.716023	0.372782
72194	0.48267	0.740775	0.364205	0.253068	0.193199	0.47138	0.318289	0.716023	0.372782
359064	0.48267	0.740775	0.364205	0.253068	0.193199	0.47138	#N/A	0.716023	0.372782
92151285	0.48267	0.740775	0.364205	0.253068	0.193199	0.47138	0.318289	0.716023	0.372782
511670	0.483111	0.299123	0.351434	0.0745435	0.252451	0.00553809	0.128236	0.0583036	0.288849
121487512	0.483111	0.299123	0.351434	#N/A	0.252451	0.00553809	0.128236	0.0583036	0.288849
86751195	0.483135	0.641704	0.3614	0.288009	0.21748	0.349147	0.335926	0.565727	0.367046
131708567	0.483249	0.301292	0.308566	0.0766416	0.274654	0.0397795	0.153766	0.0186261	0.430053
131885779	0.483249	0.297947	0.309037	0.0778894	0.272482	0.0397795	0.155551	0.0186261	0.429673
90472229	0.483412	0.597608	0.367792	#N/A	0.218422	0.00978739	0.0770352	0.0162948	0.403281
451602	0.483604	0.0995013	0.352954	0.0810017	0.210112	0.0266585	0.0676963	0.019353	0.388106
134693115	0.483604	0.0995013	0.352954	0.0810017	0.210112	0.0266585	0.0676963	0.019353	0.388106
14312484	0.483604	0.0995013	0.352954	0.0810017	0.210112	0.0266585	0.0676963	0.019353	0.388106
5278282	0.484008	0.689084	0.384085	0.155156	0.246316	0.0516326	0.47625	0.595288	0.714811
473280	0.484446	0.931865	0.380393	0.0350821	0.218889	0.0162891	0.168551	0.0444463	0.45324
16760387	0.484581	0.354968	0.379894	0.170536	0.208262	0.0597792	0.083711	0.0222943	0.542832
16212026	0.484581	0.361128	0.379705	0.183941	0.209528	0.0597792	0.0968045	0.0269848	0.543794
102602088	0.484581	0.361128	0.379705	0.183941	0.209528	0.0597792	0.0968045	0.0269848	0.543794
121486971	0.484581	0.356518	0.380306	0.165921	0.205449	0.068047	0.0918483	0.0250678	0.543323
6603781	0.484581	0.354968	0.379894	0.170536	0.208262	0.0597792	0.083711	0.0222943	0.542832
121487027	0.484581	0.359483	0.379704	0.178719	0.21052	0.0608058	0.0838875	0.0269188	0.543828
121487034	0.484581	0.356995	0.37986	0.170536	0.207626	0.0597792	0.0843219	0.0252241	0.543323
160696	0.484581	0.354968	0.379894	0.170536	0.208262	0.0597792	0.083711	0.0222943	0.542832
12358851	0.484581	0.354968	0.379894	0.170536	0.208262	0.0597792	0.083711	0.0222943	0.542832
131701110	0.484581	0.361355	0.379816	0.170536	0.205661	0.0597792	0.0863178	0.0273679	0.543828
6713582	0.484581	0.354968	0.379894	0.170536	0.208262	0.0597792	0.083711	0.0222943	0.542832
24729357	0.484581	0.354968	0.379894	0.170536	0.208262	0.0597792	0.083711	0.0222943	0.542832
5702244	0.484581	0.354968	0.379894	0.170536	0.208262	0.0597792	0.083711	0.0222943	0.542832
91142034	0.484581	0.361355	0.379816	0.170536	0.205661	0.0597792	0.0863178	0.0273679	0.543828
596	0.484581	0.354968	#N/A	0.170536	0.208262	0.0597792	0.083711	0.0222943	0.542832
102601364	0.484581	0.358955	0.37983	0.170536	0.207626	0.0597792	0.0843219	0.0269951	0.543828
67709179	0.484662	0.510224	0.398547	0.102831	0.251715	0.0597102	0.081411	0.0408247	0.451536
150851	0.484674	0.590909	0.368052	0.0856416	0.220076	0.00978739	0.0769019	0.0149111	0.402566
21122961	0.484674	0.590909	0.368052	0.0856416	0.220076	0.00978739	0.0769019	0.0149111	0.402566
29933626	0.484674	0.590909	0.368052	0.0856416	0.220076	0.00978739	0.0769019	0.0149111	0.402566
40544496	0.484674	0.590909	0.368052	0.0856416	0.220076	0.00978739	0.0769019	0.0149111	0.402566
44629873	0.484674	0.590909	0.368052	0.0856416	0.220076	0.00978739	0.0769019	0.0149111	0.402566
92268334	0.484674	0.590909	0.368052	0.0856416	0.220076	0.00978739	0.0769019	0.0149111	0.402566
3007908	0.484674	0.590909	0.368052	0.0856416	0.220076	0.00978739	0.0769019	0.0149111	0.402566
45358309	0.484674	0.590909	0.368052	0.0856416	0.220076	0.00978739	0.0769019	0.0149111	0.402566
3080719	0.485161	0.263846	0.399768	0.06176	0.195594	0.0619751	0.527967	0.219653	0.672534
5273524	0.485161	0.263846	0.399768	0.06176	0.195594	0.0619751	0.527967	0.219653	0.672534
175228	0.485224	0.408077	0.421824	0.0938804	0.231081	0.13225	0.472241	0.539292	0.798517
21721736	0.486365	0.433101	0.365964	0.0398807	0.194393	0.217459	0.56157	0.760298	0.72005
3083166	0.487074	0.792943	0.361596	0.214423	0.239367	0.0420912	0.313155	0.505263	0.819874
6451079	0.488164	0.327789	0.450767	0.189921	0.286091	0.109769	0.481709	0.951581	0.824023
472637	0.488192	0.562395	0.379247	0.130472	0.223318	0.0403022	0.737192	0.567306	0.694486
6480471	0.488307	0.070746	0.32274	0.1066	0.239486	0.132179	0.489082	0.331093	0.753331
76974604	0.488555	0.303361	0.308863	0.0774362	0.273522	0.0444432	0.156406	0.0187126	0.430446
44396095	0.488778	0.567057	0.367207	0.196485	0.247973	0.17032	0.274611	0.626791	0.822824
21140838	0.488896	0.795523	0.443778	0.149186	0.311781	0.230192	0.331456	0.91452	0.827892
14806063	0.489009	0.635299	0.420386	0.230025	0.294355	0.515358	0.56227	0.725905	0.574895
196710	0.489009	0.635299	0.420386	0.230025	0.294355	0.515358	0.56227	0.725905	0.574895
6454537	0.489333	0.950082	0.335681	0.0197802	0.208619	0.199043	0.197543	0.74259	0.545383
54192124	0.489333	0.950082	0.335681	0.0197802	0.208619	0.199043	0.197543	0.74259	0.545383
121012732	0.489488	0.28165	0.352757	0.0480973	0.252037	0.0522482	0.2324	0.695411	0.59482
124528040	0.48949	0.58923	0.445061	0.132409	0.188917	0.274948	0.680088	0.38763	0.68219
21852781	0.490158	0.660543	0.415435	0.178638	0.236392	0.0708053	0.151083	0.667504	0.609114
512658	0.490266	0.713966	0.384076	0.176953	0.254968	0.158483	0.706879	0.596293	0.82002
506143	0.490304	0.51045	0.402949	0.0699373	0.232661	0.171608	0.507217	0.395691	0.859301
72968	0.490304	0.51045	0.402949	0.0699373	0.232661	0.171608	0.507217	0.395691	0.859301
54069128	0.490332	0.467801	0.391506	0.135296	0.275282	0.305598	0.674327	0.492215	0.724856
91884695	0.490713	0.452572	0.372608	0.124318	0.229135	0.0379963	0.0732413	0.0325258	0.405042
92043448	0.490713	0.452572	0.372608	0.124318	0.229135	0.0379963	0.0732413	0.0325258	0.405042
65031	0.490713	0.452572	0.372608	0.124318	0.229135	0.0379963	0.0732413	0.0325258	0.405042
76973301	0.490902	0.818163	0.461132	0.170202	0.247958	0.0287146	0.134591	0.0495136	0.421512
333691	0.490925	0.399907	0.395304	0.141543	0.237226	0.141017	0.425011	0.399514	0.622072
54041813	0.490925	0.399907	0.395304	0.141543	0.237226	0.141017	0.425011	0.399514	0.622072
21141083	0.491281	0.634359	0.412733	0.162137	0.249583	0.0378377	0.11737	0.0373802	0.467143
21732848	0.491601	0.417269	0.385048	0.0730253	0.275985	0.0404055	0.402798	0.548868	0.7793
22867782	0.491734	0.510639	0.470605	0.168046	0.353656	0.273147	0.388033	0.359497	0.87331
473083	0.492203	0.904859	0.414009	0.174849	0.199907	0.230763	0.34571	0.350102	0.444577
71539312	0.492255	0.378596	0.390397	0.104235	0.261724	0.0311443	0.134588	0.049826	0.464457
6483432	0.492336	0.492366	0.378384	0.308617	0.277572	0.0473091	0.450605	0.702255	0.492526
15612862	0.49245	0.572789	0.410317	0.0542199	0.148087	0.364088	0.562299	0.533245	0.508922
391266	0.493014	0.881821	0.37602	0.162623	0.222533	0.129009	0.492248	0.655577	0.768101
496474	0.493014	0.881821	0.37602	0.162623	0.222533	0.129009	0.492248	0.655577	0.768101
121427567	0.493278	0.785453	0.388919	0.546257	0.222133	0.0861596	0.114349	0.0644311	0.526977
11054511	0.493278	0.785453	0.388919	0.546257	0.222133	0.0861596	0.114349	0.0644311	0.526977
46705350	0.493278	0.785453	0.388919	0.546257	0.222133	0.0861596	0.114349	0.0644311	0.526977
13922196	0.493278	0.785453	0.388919	0.546257	0.222133	0.0861596	0.114349	0.0644311	0.526977
3461	0.493278	0.785453	0.388919	0.546257	0.222133	0.0861596	0.114349	0.0644311	0.526977
6093357	0.493278	0.785453	0.388919	0.546257	0.222133	0.0861596	0.114349	0.0644311	0.526977
45357852	0.493425	0.460277	0.341491	0.246157	0.199495	0.103877	0.514798	0.60421	0.774796
29924995	0.493425	0.460277	0.341491	0.246157	0.199495	0.103877	0.514798	0.60421	0.774796
490511	0.493506	0.668968	0.339883	0.0642423	0.215063	0.00857173	0.0973658	0.037374	0.679967
6452137	0.493774	0.361211	0.383447	0.0378148	0.232727	0.0177399	0.206416	0.0448498	0.555645
54260440	0.494208	0.326516	0.38055	0.103019	0.271262	0.0800866	0.166297	0.0223681	0.429003
71414969	0.494604	0.583398	0.405807	0.396592	0.265257	0.341189	0.392092	0.776016	0.817575
53322921	0.494752	0.401065	0.425576	0.148115	0.264516	0.258757	0.476722	0.592918	0.842049
9993207	0.49479	0.0619165	0.327497	0.166455	0.229891	0.197076	0.627749	0.548595	0.578693
154701265	0.495706	0.515427	0.407924	0.547542	0.263343	0.283002	0.529106	0.790162	0.661967
326808	0.495839	0.444184	0.336785	0.453039	0.209132	0.149786	0.633981	0.834778	0.782649
44329981	0.495839	0.444184	0.336785	0.453039	0.209132	0.149786	0.633981	0.834778	0.782649
125507539	0.496216	0.184855	0.384286	0.0775382	0.269766	0.0336826	0.671681	0.440784	0.854891
353671	0.496431	0.579307	0.286688	0.0680324	0.204079	0.079667	0.251576	0.61607	0.286822
131884918	0.496496	0.483834	0.42874	0.286188	0.343896	0.242725	0.75254	0.90142	0.65366
67841326	0.496546	0.404867	0.385381	0.297154	0.244454	0.0132297	0.546626	0.390703	0.819309
67841222	0.496546	0.404867	0.385381	0.297154	0.244454	0.0132297	0.546626	0.390703	0.819309
92253393	0.496623	0.367174	0.352728	0.0711092	0.229428	0.0307656	0.0920818	0.0205935	0.386378
92253390	0.496623	0.367174	0.352728	0.0711092	0.229428	0.0307656	0.0920818	0.0205935	0.386378
125124867	0.496623	0.367174	0.352728	0.0711092	0.229428	0.0307656	0.0920818	0.0205935	0.386378
14608008	0.496623	0.367174	0.352728	0.0711092	0.229428	0.0307656	0.0920818	0.0205935	0.386378
3007223	0.496673	0.886093	0.384166	0.448729	0.242178	0.0560212	0.725855	0.91639	0.807376
135524757	0.496725	0.731134	0.445783	0.182439	0.243714	0.128503	0.341948	0.632685	0.758131
121487038	0.498898	0.363441	0.379692	0.178719	0.210285	0.068047	0.0838875	0.027086	0.544879
100935585	0.498898	0.363924	0.379578	0.176335	0.210285	0.0692051	0.0849232	0.027086	0.544879
11749237	0.498953	0.806108	0.41776	0.493608	0.30582	0.251708	0.583408	0.748661	0.592224
510999	0.499553	0.688522	0.372496	0.120167	0.243408	0.331839	0.125592	0.0437792	0.503879
136238397	0.499618	0.884475	0.418996	0.144779	0.196694	0.228585	0.178718	0.371426	0.538308
516072	0.500506	0.498258	0.324209	0.0285889	0.230463	0.529856	0.657755	0.361862	0.583989
126915	0.500888	0.623107	0.393367	0.063635	0.21239	0.0672127	0.29909	0.291921	0.686402
11501773	0.50097	0.639435	0.39771	0.440596	0.287311	0.338089	0.424491	0.828142	0.630289
5272753	0.501607	0.778435	0.452777	0.0271904	0.256937	0.195225	0.238124	0.091174	0.442534
3007224	0.501749	0.72417	0.378047	0.453082	0.277134	0.0409739	0.634186	0.816157	0.804028
92258444	0.501875	0.297238	0.400515	0.0966211	0.255958	0.075366	0.582822	0.889129	0.838109
10828395	0.501875	0.297238	0.400515	0.0966211	0.255958	0.075366	0.582822	0.889129	0.838109
121487333	0.502301	0.796235	0.424603	0.216923	0.196376	0.00785866	0.277646	0.041066	0.499793
92243788	0.502301	0.796235	0.424603	0.216923	0.196376	0.00785866	0.277646	0.041066	0.499793
59048458	0.502615	0.141935	0.26327	0.0124906	0.179713	0.390523	0.482851	0.748013	0.584722
469447	0.503142	0.846826	0.444815	0.0889821	0.305435	0.310317	0.60381	0.437394	0.536719
92243924	0.503807	0.463604	0.397737	0.274247	0.237111	0.384593	0.70272	0.891682	0.852758
21144466	0.503807	0.463604	0.397737	0.274247	0.237111	0.384593	0.70272	0.891682	0.852758
121486913	0.503999	0.0926972	0.390268	0.0243972	0.222507	0.0811114	0.477354	0.5247	0.792254
134694066	0.504224	0.657678	0.440643	0.190791	0.313598	0.327667	0.594905	0.744653	0.717473
29982328	0.504224	0.657678	0.440643	0.190791	0.313598	0.327667	0.594905	0.744653	0.717473
169662	0.504224	0.657678	0.440643	0.190791	0.313598	0.327667	0.594905	0.744653	0.717473
93604123	0.504224	0.657678	0.440643	0.190791	0.313598	0.327667	0.594905	0.744653	0.717473
44356940	0.504224	0.657678	0.440643	0.190791	0.313598	0.327667	0.594905	0.744653	0.717473
12042143	0.504224	0.657678	0.440643	0.190791	0.313598	0.327667	0.594905	0.744653	0.717473
92845691	0.504224	0.657678	0.440643	0.190791	0.313598	0.327667	0.594905	0.744653	0.717473
86288424	0.504314	0.505749	0.364656	0.267364	0.262988	0.10169	0.16448	0.045323	0.514256
470049	0.504394	0.865587	0.44709	0.076497	0.321614	0.350782	0.58979	0.471496	0.520363
465094	0.504394	0.865587	0.44709	#N/A	0.321614	0.350782	0.58979	0.471496	0.520363
139025281	0.504402	0.379792	0.430687	0.165921	0.208023	0.0766917	0.0963723	0.0296169	0.543001
71315149	0.504402	0.379792	0.430687	0.165921	0.208023	0.0766917	0.0963723	0.0296169	0.543001
7045516	0.504519	0.784931	0.432264	0.125094	0.191956	0.329578	0.637485	0.404121	0.535173
513124	0.504519	0.784931	0.432264	0.125094	0.191956	0.329578	0.637485	0.404121	0.535173
513122	0.504519	0.784931	0.432264	0.125094	0.191956	0.329578	0.637485	0.404121	0.535173
5894	0.504519	0.784931	0.432264	0.125094	#N/A	0.329578	0.637485	0.404121	0.535173
3010355	0.505946	0.258443	0.451527	0.177694	0.290467	0.523237	0.421431	0.895896	0.552178
57372617	0.506263	0.502378	0.33635	0.0493764	0.250742	0.0337105	0.219804	0.0104967	0.301545
15024543	0.506966	0.21188	0.37172	0.102694	0.240776	0.0368086	0.509372	0.777593	0.797236
25266884	0.507035	0.724287	0.445464	0.124546	0.225232	0.154335	0.535859	0.58025	0.422153
5278277	0.507493	0.70077	0.447161	0.185981	0.26137	0.357155	0.514309	0.680107	0.73436
49784203	0.508023	0.238929	0.417355	0.211993	0.332581	0.233556	0.704311	0.878941	0.842663
516074	0.508141	0.750878	0.315753	0.0458092	0.238534	0.414429	0.533121	0.330366	0.468758
10405378	0.508539	0.728309	0.407808	0.266155	0.354366	0.186727	0.239272	0.398129	0.643475
90472732	0.508787	0.360542	0.41438	0.170536	0.212503	0.0674496	0.0839818	0.0269276	0.543918
3007218	0.509222	0.316946	0.367158	0.145781	0.283289	0.0668294	0.338506	0.920652	0.784475
131858474	0.509282	0.30106	0.437592	0.037421	0.334885	0.0267437	0.598887	0.89323	0.925636
131885132	0.509539	0.246344	0.395136	0.0529342	0.259365	0.0479104	0.389423	0.729813	0.622497
14430336	0.509758	0.368221	0.41865	0.0853323	0.234353	0.579966	0.544837	0.72356	0.661904
57348664	0.509881	0.56415	0.415423	0.0807326	0.238417	0.115742	0.190191	0.0538306	0.390539
21817599	0.509934	0.33769	0.431173	0.153493	0.217165	0.0594726	0.422497	0.233897	0.506793
276394	0.509934	0.33769	0.431173	0.153493	0.217165	0.0594726	0.422497	0.233897	0.506793
132663	0.509943	0.66153	0.416983	0.573443	0.313125	0.533788	0.624935	0.880902	0.812083
92270653	0.510106	0.579571	0.377587	0.105215	0.271705	0.551758	0.706678	0.472977	0.829715
500247	0.510106	0.579571	0.377587	0.105215	0.271705	0.551758	0.706678	0.472977	0.829715
86592812	0.510656	0.494149	0.442221	0.206582	0.298708	0.268145	0.488348	0.79241	0.698721
121596077	0.510714	0.359669	0.420223	0.178719	0.214131	0.0674496	0.0846441	0.0247113	0.543318
59051498	0.511015	0.416777	0.365932	0.212818	0.261135	0.298531	0.225523	0.0427197	0.634271
29980301	0.511015	0.416777	0.365932	0.212818	0.261135	0.298531	0.225523	0.0427197	0.634271
20285	0.511015	0.416777	0.365932	0.212818	0.261135	0.298531	0.225523	0.0427197	0.634271
46875049	0.511015	0.416777	0.365932	0.212818	0.261135	0.298531	0.225523	0.0427197	0.634271
134694098	0.511015	0.416777	0.365932	0.212818	0.261135	0.298531	0.225523	0.0427197	0.634271
16861	0.511015	0.416777	0.365932	0.212818	0.261135	0.298531	0.225523	0.0427197	0.634271
12896821	0.511015	0.416777	0.365932	0.212818	0.261135	0.298531	0.225523	0.0427197	0.634271
135511145	0.511184	0.922851	0.419635	0.253892	0.297267	0.426723	0.169274	0.918896	0.647608
472658	0.511345	0.322389	0.419049	0.0833306	0.245896	0.107731	0.40025	0.650545	0.843716
472640	0.511345	0.322389	0.419049	0.0833306	0.245896	0.107731	0.40025	0.650545	0.843716
6479521	0.511971	0.145189	0.390465	0.0373096	0.217086	0.0251902	0.265288	0.817691	0.622795
3010606	0.512019	0.59935	0.380975	0.193789	0.259537	0.10803	0.291902	0.685841	0.484242
498018	0.512166	0.635098	0.405761	0.159985	0.246757	0.148519	0.379931	0.558298	0.84875
25197	0.512268	0.574266	0.35095	0.16135	0.232448	0.630162	0.157533	0.0204131	0.511688
240980	0.512268	0.574266	#N/A	0.16135	0.232448	0.630162	0.157533	0.0204131	0.511688
515328	0.512268	0.574266	0.35095	0.16135	0.232448	0.630162	0.157533	0.0204131	0.511688
60140908	0.512268	0.574266	0.35095	0.16135	0.232448	0.630162	0.157533	0.0204131	0.511688
76973118	0.512546	0.720738	0.415818	0.0642423	0.210796	0.00984283	0.0812538	0.0492818	0.679814
44150017	0.51281	0.483449	0.405324	0.107538	0.231442	0.0620566	0.45807	0.415326	0.815471
42607051	0.51281	0.397526	0.404513	0.0612614	0.230781	0.0472146	0.493133	0.392839	0.828066
15612873	0.514051	0.503088	0.404706	0.244234	0.18635	0.499966	0.488403	0.173999	0.536411
502232	0.514095	0.422109	0.323157	0.0630317	0.275667	0.0658987	0.403575	0.744599	0.445334
134067785	0.514697	0.551643	0.449443	0.451843	0.312799	0.305398	0.583304	0.765015	0.624198
490683	0.51473	0.431323	0.402019	0.201135	0.193162	0.0656524	0.511814	0.273633	0.641403
490682	0.51473	0.431323	0.402019	0.201135	0.193162	0.0656524	0.511814	0.273633	0.641403
3011895	0.515161	0.202295	0.409031	0.216886	0.20533	0.275575	0.356614	0.543076	0.603084
91927745	0.51528	0.669092	0.380214	0.0669079	0.213516	0.00834106	0.0987813	0.0416407	0.675501
14408976	0.515691	0.47619	0.390621	0.0811347	0.302197	0.232885	0.554413	0.426702	0.601405
21144622	0.515716	0.129677	0.424513	0.0461221	0.343834	0.108868	0.677155	0.954987	0.636987
5279426	0.516007	0.401512	0.360688	0.0619372	0.172194	0.276301	0.590596	0.599117	0.502824
13009595	0.516191	0.59772	0.42128	0.306492	0.240682	0.0664061	0.533351	0.586153	0.841269
5271785	0.516265	0.420444	0.371126	0.36549	0.204325	0.0767324	0.358536	0.516831	0.559035
49784137	0.516286	0.357643	0.398959	0.175741	0.35356	0.182875	0.673871	0.89588	0.83727
92243975	0.516356	0.247806	0.397792	0.0933507	0.252354	0.180047	0.557011	0.911963	0.824118
5273016	0.516411	0.682443	0.364099	0.0399235	0.320597	0.0493314	0.374319	0.366514	0.762013
324310	0.516411	0.496651	0.373078	0.197906	0.279178	0.0347069	0.442752	0.49049	0.812228
475524	0.516475	0.640957	0.377242	0.0873407	0.243375	0.0898104	0.255282	0.761988	0.444995
461404	0.516475	0.640957	0.377242	0.0873407	0.243375	0.0898104	0.255282	0.761988	0.444995
16076142	0.516485	0.260067	0.395631	0.0416332	0.25504	0.0565229	0.578077	0.964555	0.808917
49849608	0.516494	0.368244	0.445195	0.176335	0.220099	0.0697149	0.0847697	0.0276105	0.544044
455763	0.516606	0.789378	0.418263	0.428647	0.282677	0.12675	0.52813	0.774435	0.680031
512591	0.516984	0.444174	0.395482	0.360577	0.217764	0.173785	0.488552	0.875799	0.724875
270861	0.517068	0.414807	#N/A	0.0533535	0.344375	0.0660136	0.495563	0.909978	0.804159
470024	0.517068	0.414807	0.405397	0.0533535	0.344375	0.0660136	0.495563	0.909978	0.804159
14430375	0.517497	0.766593	0.394482	0.266687	0.237062	0.547282	0.475043	0.816351	0.469294
452097	0.517497	0.766593	0.394482	0.266687	0.237062	0.547282	0.475043	0.816351	0.469294
160067	0.517504	0.443544	0.411346	0.108166	0.252531	0.152335	0.485028	0.43951	0.854101
289971	0.518879	0.54171	0.3562	0.310487	0.232654	0.0737471	0.506786	0.502154	0.811375
448403	0.518879	0.54171	0.3562	0.310487	0.232654	0.0737471	0.506786	0.502154	0.811375
129862	0.518931	0.489936	0.40307	0.0876016	0.248352	0.118698	0.439699	0.444553	0.666156
10264873	0.518935	0.396543	0.408073	0.275122	0.216762	0.114276	0.616278	0.337552	0.65235
13871050	0.519012	0.60447	0.404756	0.383135	0.169314	0.258956	0.193978	0.383147	0.45178
512601	0.519326	0.12961	0.416634	0.233254	0.361386	0.0624397	0.492462	0.594927	0.476722
9942889	0.519382	0.352563	0.348413	0.0963756	0.205106	0.387906	0.179173	0.0684444	0.475613
15955042	0.519591	0.640716	0.388129	0.310586	0.259707	0.337767	0.51113	0.924828	0.76632
9562214	0.519747	0.433335	0.432273	0.229141	0.269497	0.509357	0.667745	0.863175	0.866695
92236380	0.519747	0.433335	0.432273	0.229141	0.269497	0.509357	0.667745	0.863175	0.866695
131876195	0.519747	0.433335	0.432273	0.229141	0.269497	0.509357	0.667745	0.863175	0.866695
516086	0.519761	0.0521205	0.345143	0.02892	0.202383	0.243091	0.351395	0.540755	0.590861
51360252	0.519844	0.285424	0.369241	0.276273	0.205212	0.178513	#N/A	0.0195267	0.505293
71380931	0.520219	0.252931	0.3485	0.178132	0.286804	0.18166	0.644007	0.660365	0.748026
510973	0.520251	0.447534	0.365957	0.178491	0.269032	0.595004	0.127455	0.0295799	0.618083
490626	0.520501	0.808448	0.401844	0.234168	0.240658	0.158785	0.640437	0.47242	0.65074
464376	0.521143	0.319777	0.400882	0.4163	0.241413	0.348866	0.395818	0.719735	0.635702
451873	0.521221	0.607674	0.352117	0.155643	0.188157	0.119161	0.369737	0.376641	0.682725
67860541	0.521221	0.607674	0.352117	0.155643	0.188157	0.119161	0.369737	0.376641	0.682725
46780426	0.521395	0.795846	0.45239	0.546257	0.233725	0.101968	0.114598	0.0725207	0.534128
133688245	0.521395	0.795846	0.45239	0.546257	0.233725	0.101968	0.114598	0.0725207	0.534128
134481	0.521482	0.232966	0.381093	0.157096	0.282778	0.0197003	0.0959978	0.0245287	0.435762
7308567	0.521482	0.232966	0.381093	#N/A	0.282778	0.0197003	0.0959978	0.0245287	0.435762
67175601	0.521865	0.376498	0.3772	0.250508	0.22869	0.0199468	0.145242	0.0481561	0.475882
154809499	0.522162	0.795663	0.403955	0.0549419	0.26049	0.243257	0.34277	0.56089	0.32151
54506098	0.522355	0.454445	0.412608	0.122502	0.220925	0.0573632	0.119093	0.0412098	0.494152
70684952	0.522383	0.554003	0.407988	0.0896464	0.236043	0.0659353	0.492966	0.329268	0.842918
96410	0.522383	0.554003	0.407988	0.0896464	0.236043	0.0659353	0.492966	0.329268	0.842918
72212535	0.522383	0.554003	0.407988	0.0896464	0.236043	0.0659353	0.492966	0.329268	0.842918
3009784	0.5231	0.794599	0.332394	0.0757176	0.24332	0.0415619	0.32747	0.359361	0.818136
9992803	0.52322	0.803176	0.421314	0.181529	0.266999	0.199222	0.174166	0.0616304	0.695635
58463518	0.523349	0.545735	0.391005	0.305782	0.233367	0.0419589	0.0862657	0.0293062	0.388419
131885191	0.523389	0.220198	0.431688	0.0536947	0.348515	0.127892	0.655342	0.945415	0.811711
97119	0.52357	0.723856	0.394294	0.215178	0.256495	0.152815	0.344015	0.328759	0.722855
510971	0.523616	0.424176	0.365375	0.0706759	0.270159	0.17137	0.101117	0.0174725	0.495903
3039710	0.524065	0.313393	0.373708	0.15811	0.305515	0.145752	0.115647	0.928185	0.821967
57246734	0.524073	0.880776	0.382717	0.345335	0.210285	0.127481	0.448195	0.476902	0.749884
10849690	0.524073	0.880776	0.382717	0.345335	0.210285	0.127481	0.448195	0.476902	0.749884
9797705	0.524159	0.131723	0.42285	0.148205	0.259763	0.243585	0.592082	0.918046	0.68213
502229	0.524387	0.585114	0.329289	0.0319279	0.229996	0.0283868	0.391299	0.548533	0.716126
92242775	0.524413	0.793733	0.401777	0.468899	0.315294	0.372971	0.704684	0.928856	0.81315
3006169	0.524413	0.793733	0.401777	0.468899	0.315294	0.372971	0.704684	0.928856	0.81315
477413	0.524433	0.613454	0.36647	0.16197	0.207903	0.171214	0.0872156	0.0112904	0.511775
9842606	0.524828	0.426576	0.347327	0.562818	0.312938	0.46893	0.650675	0.914742	0.79041
121486815	0.524956	0.352267	0.400608	0.0582062	0.255212	0.101292	0.521278	0.405884	0.687343
135618594	0.525019	0.645223	0.408166	0.238932	0.21385	0.0839804	0.13229	0.567052	0.59664
56671903	0.525542	0.311737	0.411933	0.199942	0.325011	0.384876	0.597609	0.889554	0.849212
14806070	0.525708	0.320532	0.384323	0.149244	0.223228	0.260111	0.449789	0.917618	0.51743
6476927	0.525871	0.468473	0.393334	0.112249	0.225648	0.22972	0.563107	0.493039	0.8299
10037499	0.525879	0.313259	0.306509	0.107315	0.272415	0.29412	0.193742	0.0414837	0.557432
59859763	0.525879	0.313259	0.306509	0.107315	0.272415	0.29412	0.193742	0.0414837	0.557432
56995133	0.525879	0.313259	0.306509	0.107315	0.272415	0.29412	0.193742	0.0414837	0.557432
29942411	0.525879	0.313259	0.306509	0.107315	0.272415	0.29412	0.193742	0.0414837	0.557432
134694166	0.525879	0.313259	0.306509	0.107315	0.272415	0.29412	0.193742	0.0414837	0.557432
67419448	0.525879	0.313259	0.306509	0.107315	0.272415	0.29412	0.193742	0.0414837	0.557432
121606027	0.525988	0.212016	0.414569	0.12517	0.259517	0.104558	0.277465	0.934981	0.611103
11208563	0.526327	0.202543	0.387257	0.0422874	0.243014	0.0255613	0.381183	0.650483	0.647334
92243772	0.526527	0.687442	0.431261	0.330694	0.291674	0.281865	0.521778	0.779557	0.866126
21818173	0.526527	0.687442	0.431261	0.330694	0.291674	0.281865	0.521778	0.779557	0.866126
135618698	0.526763	0.72469	0.403385	0.144992	0.224578	0.0633313	0.151298	0.478322	0.62041
135856077	0.526763	0.72469	0.403385	0.144992	0.224578	0.0633313	0.151298	0.478322	0.62041
121486764	0.526914	0.68522	0.431135	0.146414	0.257969	0.322604	0.42401	0.907301	0.841865
493442	0.526983	0.438685	0.403117	0.249914	0.238066	0.292061	0.3556	0.660686	0.611667
159738	0.527434	0.342788	0.395116	0.256421	0.202389	0.0752818	0.498877	0.507518	0.674184
46936923	0.527434	0.342788	0.395116	0.256421	0.202389	0.0752818	0.498877	0.507518	0.674184
443234	0.527637	0.333642	0.374903	0.139615	0.246579	0.102236	0.300417	0.211771	0.818428
71317045	0.527894	0.811018	0.462436	0.533464	0.232912	0.101968	0.112552	0.0699866	0.53654
11043124	0.528466	0.256735	0.34069	0.204631	0.230944	0.136782	0.223529	0.336477	0.792093
131881043	0.52847	0.432092	0.407081	0.180721	0.221015	0.0702651	0.354402	0.714417	0.625403
25182693	0.528619	0.532886	0.377748	0.158086	0.175231	0.315146	0.367623	0.727836	0.748111
67358	0.528782	0.691344	0.399072	0.0842807	0.223745	0.189724	0.530865	0.308805	0.828472
154731285	0.529317	0.32086	0.306129	0.107315	0.275559	0.29412	0.188738	0.0421893	0.558192
100417	0.529546	0.571009	0.381964	0.214325	0.200315	0.206531	0.499249	0.848511	0.716767
21144431	0.529849	0.678342	0.421061	0.224459	0.265453	0.160265	0.532499	0.792264	0.918304
419564	0.529849	0.678342	0.421061	0.224459	0.265453	0.160265	0.532499	0.792264	0.918304
13830101	0.529888	0.35977	0.439707	0.362885	0.269052	0.0875333	0.582115	0.882987	0.751888
128252	0.53006	0.111128	0.326134	0.174615	0.219986	0.11426	0.459629	0.825033	0.759103
21817596	0.530398	0.317557	0.444525	0.108773	0.156593	0.0659528	0.304541	0.389039	0.456134
276398	0.530398	0.317557	0.444525	0.108773	0.156593	0.0659528	0.304541	0.389039	0.456134
92237069	0.530398	0.317557	0.444525	0.108773	0.156593	0.0659528	0.304541	0.389039	0.456134
131864833	0.530474	0.458229	0.361309	0.210523	0.224097	0.126367	0.147072	0.0676743	0.486639
352989	0.530474	0.458229	0.361309	0.210523	0.224097	0.126367	0.147072	0.0676743	0.486639
57357987	0.53069	0.312002	0.415698	0.122502	0.214608	0.134452	0.117961	0.0578273	0.561008
21140332	0.53096	0.381644	0.414595	0.262382	0.173513	0.183856	0.369696	0.478545	0.513559
10999973	0.532062	0.31519	0.372023	0.0801239	0.205554	0.38472	0.331403	0.383799	0.453857
127260544	0.532294	0.577207	0.411236	0.0877785	0.261697	0.059552	0.407066	0.340678	0.848685
71407380	0.532294	0.577207	0.411236	0.0877785	0.261697	0.059552	0.407066	0.340678	0.848685
16226669	0.532398	0.484094	0.381833	0.0913248	0.242308	0.0136473	0.0416851	0.0249002	0.454068
25796514	0.532398	0.484094	0.381833	0.0913248	0.242308	0.0136473	0.0416851	0.0249002	0.454068
59116124	0.532398	0.484094	0.381833	0.0913248	0.242308	0.0136473	0.0416851	0.0249002	0.454068
12358445	0.532398	0.484094	0.381833	0.0913248	0.242308	0.0136473	0.0416851	0.0249002	0.454068
7035901	0.532398	0.484094	0.381833	0.0913248	0.242308	0.0136473	0.0416851	0.0249002	0.454068
5901	0.532398	0.484094	0.381833	0.0913248	#N/A	0.0136473	0.0416851	0.0249002	0.454068
513034	0.5327	0.269455	0.413571	0.0235877	0.337855	0.317975	0.359787	0.719386	0.616182
493439	0.532916	0.682604	0.372236	0.439744	0.234374	0.396582	0.300191	0.636773	0.488447
57368268	0.533111	0.408453	0.341814	0.273721	0.237096	0.204143	0.561657	0.730015	0.396398
14209054	0.533155	0.268736	0.386214	0.109198	0.223678	0.0641987	0.0413187	0.0224816	0.392851
6482479	0.533155	0.268736	0.386214	0.109198	0.223678	0.0641987	0.0413187	0.0224816	0.392851
97107236	0.533155	0.268736	0.386214	0.109198	0.223678	0.0641987	0.0413187	0.0224816	0.392851
92978664	0.533155	0.268736	0.386214	0.109198	0.223678	0.0641987	0.0413187	0.0224816	0.392851
452892	0.533803	0.692698	0.421041	0.24469	0.206252	0.0314085	0.100071	0.0286299	0.566743
3035491	0.533873	0.726106	0.38654	0.0812979	0.212453	0.537585	0.233572	0.395649	0.630177
45039906	0.533873	0.726106	0.38654	0.0812979	0.212453	0.537585	0.233572	0.395649	0.630177
93977460	0.533873	0.726106	0.38654	0.0812979	0.212453	0.537585	0.233572	0.395649	0.630177
10615718	0.534587	0.251287	0.372338	0.0555061	0.271092	0.274051	0.280882	0.25568	0.780231
12939904	0.534587	0.251287	0.372338	0.0555061	0.271092	0.274051	0.280882	0.25568	0.780231
44316328	0.534604	0.27209	0.389792	0.440143	0.220704	0.269944	0.0948259	0.0897601	0.542299
500902	0.534604	0.27209	0.389792	0.440143	0.220704	0.269944	0.0948259	0.0897601	0.542299
92845515	0.534604	0.27209	0.389792	0.440143	0.220704	0.269944	0.0948259	0.0897601	0.542299
59844438	0.534604	0.27209	0.389792	0.440143	0.220704	0.269944	0.0948259	0.0897601	0.542299
13871033	0.534604	0.27209	0.389792	0.440143	0.220704	0.269944	0.0948259	0.0897601	0.542299
13871035	0.534604	0.27209	0.389792	0.440143	0.220704	0.269944	0.0948259	0.0897601	0.542299
60122232	0.534604	0.27209	0.389792	0.440143	0.220704	0.269944	0.0948259	0.0897601	0.542299
97467	0.534756	0.560955	0.410974	0.0756746	0.219926	0.109926	0.326377	0.20374	0.689486
277139	0.534756	0.560955	0.410974	0.0756746	0.219926	0.109926	0.326377	0.20374	0.689486
92238006	0.534756	0.560955	0.410974	0.0756746	0.219926	0.109926	0.326377	0.20374	0.689486
510972	0.535045	0.429652	0.368826	0.318923	0.250026	0.220362	0.0943728	0.0380527	0.521306
13566112	0.535482	0.892543	0.448467	0.221921	0.261312	0.021129	0.267258	0.0373154	0.472686
54021277	0.535669	0.356433	0.374033	0.19856	0.221467	0.122787	0.13305	0.038025	0.488376
11010214	0.535685	0.32103	0.410984	0.0959847	0.218091	0.0130124	0.0469197	0.0173287	0.424832
506146	0.535693	0.863447	0.445395	0.167492	0.208395	0.180635	0.549832	0.308105	0.555197
86592813	0.535811	0.402559	0.446548	0.249735	0.272712	0.402523	0.407124	0.802046	0.689235
453757	0.535955	0.547131	0.321845	0.00621469	0.129355	0.510848	0.244994	0.634419	0.705954
451961	0.535977	0.299034	0.351341	0.0537465	0.157733	0.927307	0.538582	0.403054	0.707092
5272660	0.536057	0.567039	0.408731	0.171382	0.240308	0.0589322	0.473271	0.187176	0.698002
21069732	0.5364	0.579324	0.406328	0.550077	0.312424	0.230044	0.597169	0.9201	0.824759
100935581	0.536681	0.326643	0.380994	0.101026	0.216149	0.0131789	0.0479856	0.017049	0.423279
151772	0.536681	0.328784	0.381473	0.0931607	0.212853	0.0118501	0.0469918	0.0185111	0.423209
21157436	0.536804	0.266532	0.379842	0.148072	0.324071	0.440084	0.537301	0.89074	0.842593
138113809	0.537202	0.696231	0.358975	#N/A	0.228769	0.032086	0.089634	0.0307334	0.386851
127258181	0.537202	0.696231	0.358975	0.203982	0.228769	0.032086	0.089634	0.0307334	0.386851
93055319	0.537416	0.332043	0.391789	0.164252	0.208895	0.0704937	0.675615	0.369351	0.671203
23190	0.537416	0.332043	0.391789	0.164252	0.208895	0.0704937	0.675615	0.369351	0.671203
12769724	0.537416	0.332043	0.391789	0.164252	0.208895	0.0704937	0.675615	0.369351	0.671203
44386188	0.537416	0.332043	0.391789	0.164252	0.208895	0.0704937	0.675615	0.369351	0.671203
121011847	0.537582	0.33868	0.38978	0.0477543	0.21779	0.0308658	0.202481	0.768728	0.48737
13830104	0.537704	0.342353	0.431758	0.230245	0.28554	0.0859032	0.606977	0.898505	0.737042
512291	0.537786	0.76897	0.375693	#N/A	0.230477	0.278037	0.542658	0.904596	0.807386
516066	0.538042	0.727077	0.324415	0.0368363	0.201692	0.457973	0.506651	0.18048	0.4917
6102683	0.538136	0.696211	0.389195	0.0559173	0.18637	0.190467	0.128941	0.265357	0.543001
92043551	0.538208	0.321737	0.381526	0.0959847	0.21451	0.012805	0.0463412	0.0179284	0.422252
126969140	0.538208	0.323653	0.381589	0.0959847	0.213212	0.0118501	0.0463412	0.0172317	0.422252
71772549	0.538208	0.323653	0.381589	0.0959847	0.213212	0.0118501	0.0463412	0.0172317	0.422252
512708	0.538905	0.60152	0.357	0.0274528	0.160608	0.229597	0.389993	0.659053	0.649175
54558447	0.538933	0.485769	0.341726	0.141434	0.243741	0.122044	0.0739242	0.023168	0.486112
49784134	0.539547	0.268014	0.426614	0.160197	0.299933	0.437949	0.552121	0.92875	0.842198
12777819	0.539668	0.583695	0.338727	0.0582817	0.169733	0.143949	0.24836	0.701225	0.289126
93515751	0.539668	0.583695	0.338727	0.0582817	0.169733	0.143949	0.24836	0.701225	0.289126
11447886	0.539679	0.266363	0.371666	0.121682	0.209039	0.0407648	0.0772624	0.0110533	0.393313
6332463	0.540236	0.388907	0.386479	0.123986	0.281467	0.16503	0.386535	0.508023	0.807834
49784438	0.540456	0.316142	0.427416	0.169913	0.308095	0.270845	0.566851	0.907773	0.8552
165148	0.540847	0.323307	0.381528	0.105801	0.217911	0.0118501	0.0471372	0.0167182	0.42222
167877	0.540847	0.323431	0.381623	0.089666	0.213212	0.0118501	0.0466773	0.0174281	0.42222
121487065	0.540847	0.321475	0.381676	0.101026	0.216149	0.0118501	0.0489497	0.0161232	0.42222
121597152	0.540906	0.595014	0.358338	0.209462	0.231387	0.115222	0.362341	0.421101	0.479763
92237642	0.540906	0.595014	0.358338	0.209462	0.231387	0.115222	0.362341	0.421101	0.479763
97300838	0.541055	0.404568	0.388422	0.234821	0.206559	0.0305848	0.238723	0.0771984	0.46371
12940782	0.541135	0.304176	0.383095	0.13107	0.2095	0.234046	0.06218	0.0378515	0.498277
191831	0.541135	0.304176	0.383095	0.13107	0.2095	0.234046	0.06218	0.0378515	0.498277
6482480	0.541135	0.304176	0.383095	0.13107	0.2095	0.234046	0.06218	0.0378515	0.498277
354916	0.541149	0.641799	0.396213	0.0640614	0.227587	0.0767968	0.223191	0.419833	0.745782
5278280	0.541336	0.63597	0.44252	0.202796	0.291082	0.197108	0.467892	0.713569	0.686811
100416	0.541507	0.77731	0.376944	0.42594	0.240784	0.147131	0.563233	0.869265	0.749115
65561	0.541531	0.723678	0.35804	#N/A	0.218596	0.00960489	0.107674	0.0220992	0.483022
5271378	0.541531	0.723678	0.35804	0.0937476	0.218596	0.00960489	0.107674	0.0220992	0.483022
129389389	0.542039	0.634474	0.491583	0.0888295	0.353137	0.117363	0.283189	0.514655	0.619462
516079	0.54205	0.570467	0.337335	0.0503873	0.249074	0.542174	0.619263	0.479307	0.609614
516084	0.54205	0.570467	0.337335	0.0503873	0.249074	0.542174	0.619263	0.479307	0.609614
21824454	0.542142	0.734611	0.369664	0.169493	0.209815	0.133977	0.120201	0.0265326	0.589092
11057044	0.542397	0.716292	0.414453	0.162524	0.282708	0.416867	0.24165	0.796734	0.509831
121013684	0.542397	0.716292	0.414453	0.162524	0.282708	0.416867	0.24165	0.796734	0.509831
90472731	0.54272	0.324838	0.417547	0.0959847	0.216162	0.0138892	0.0447635	0.0187127	0.42262
512590	0.543329	0.477409	0.392072	0.409288	0.240339	0.301685	0.582214	0.901598	0.735226
21765584	0.54345	0.479677	0.347493	0.146699	0.200967	0.0132003	0.114899	0.0175944	0.387016
5273527	0.543466	0.316045	0.413808	0.126544	0.21113	0.172158	0.53514	0.496085	0.641073
6509777	0.54357	0.206146	0.454332	0.372491	0.416448	0.412685	0.634475	0.940343	0.833975
9835398	0.543662	0.267828	0.409991	0.353599	0.207558	0.616631	0.464745	0.629417	0.789431
3011893	0.543662	0.267828	0.409991	0.353599	0.207558	0.616631	0.464745	0.629417	0.789431
9878094	0.543746	0.266076	0.364628	0.149259	0.22229	0.178262	0.0585286	0.0250373	0.418515
49784136	0.544128	0.316279	0.429986	0.206788	0.313429	0.317686	0.619244	0.881616	0.844097
71761524	0.544233	0.811392	0.371091	#N/A	0.216104	0.0818787	0.0922463	0.0246467	0.491652
14071470	0.544712	0.186437	0.340944	0.065125	0.214768	0.0120911	0.155273	0.029788	0.466793
71229475	0.544832	0.207076	0.418533	0.501811	0.203807	0.138083	0.560572	0.445324	0.777411
25182694	0.544984	0.163049	0.377633	0.21584	0.188568	0.154989	0.489716	0.685505	0.762784
123262984	0.545191	0.323486	0.40889	0.0959847	0.21982	0.0130124	0.0469197	0.0180148	0.425939
451911	0.545326	0.284736	0.386335	0.0584126	0.200977	0.281381	0.721284	0.339881	0.839687
65269	0.545326	0.284736	0.386335	0.0584126	0.200977	0.281381	0.721284	0.339881	0.839687
54171947	0.545331	0.419545	0.347642	0.20437	0.23689	0.120707	0.146586	0.0367695	0.51073
351993	0.545331	0.419545	0.347642	0.20437	0.23689	0.120707	0.146586	0.0367695	0.51073
131878455	0.545644	0.593793	0.432569	0.0828146	0.23248	0.108866	0.326594	0.144235	0.700477
136041721	0.545992	0.907606	0.374109	0.213467	0.244967	0.195428	0.195961	0.393593	0.47239
21157388	0.546004	0.749178	0.374783	0.224919	0.248651	0.0981128	0.22756	0.519734	0.624471
89495556	0.546217	0.317795	0.381766	0.0959847	0.214914	0.0118501	0.0463412	0.0170888	0.421284
7059437	0.546217	0.317795	0.381766	0.0959847	0.214914	0.0118501	0.0463412	0.0170888	0.421284
121487515	0.546217	0.3198	0.381644	0.0959847	0.21451	0.0118501	0.0463412	0.0176248	0.421761
18323	0.546217	0.317795	0.381766	0.0959847	0.214914	0.0118501	0.0463412	0.0170888	0.421284
10377200	0.546217	0.319755	0.38171	0.0959847	0.214853	0.0118501	0.0485695	0.0163679	0.421761
11064619	0.546217	0.317795	0.381766	0.0959847	0.214914	0.0118501	0.0463412	0.0170888	0.421284
7059439	0.546217	0.317795	0.381766	#N/A	0.214914	0.0118501	0.0463412	0.0170888	0.421284
101384428	0.546217	0.320713	0.38164	0.101026	0.218276	0.0118501	0.0466695	0.0164239	0.421761
46780471	0.546217	0.317795	0.381766	0.0959847	0.214914	0.0118501	0.0463412	0.0170888	0.421284
45356795	0.546217	0.317795	0.381766	0.0959847	0.214914	0.0118501	0.0463412	0.0170888	0.421284
643973	0.546217	0.317795	0.381766	0.0959847	0.214914	0.0118501	0.0463412	0.0170888	0.421284
121487529	0.546217	0.319408	0.382089	0.0931607	0.213554	0.0118501	0.0489788	0.0163146	0.421761
451603	0.546241	0.267163	0.351468	0.261378	0.211056	0.185766	0.108	0.0379478	0.423641
94842080	0.546241	0.588007	0.363773	0.259587	0.198644	0.0697291	0.100176	0.0265083	0.513191
57197621	0.546241	0.588007	0.363773	0.259587	0.198644	0.0697291	0.100176	0.0265083	0.513191
54669719	0.546241	0.588007	0.363773	0.259587	0.198644	0.0697291	0.100176	0.0265083	0.513191
21117608	0.546241	0.588007	0.363773	0.259587	0.198644	0.0697291	0.100176	0.0265083	0.513191
27556877	0.546241	0.588007	0.363773	0.259587	0.198644	0.0697291	0.100176	0.0265083	0.513191
688478	0.546241	0.588007	0.363773	0.259587	0.198644	0.0697291	0.100176	0.0265083	0.513191
352976	0.546241	0.588007	0.363773	0.259587	0.198644	0.0697291	#N/A	0.0265083	0.513191
151382	0.546241	0.588007	0.363773	0.259587	0.198644	0.0697291	0.100176	0.0265083	0.513191
101507	0.546241	0.588007	0.363773	0.259587	0.198644	0.0697291	0.100176	0.0265083	0.513191
121487114	0.546521	0.330312	0.38125	0.0959847	0.21656	0.0118501	0.049829	0.0160422	0.42437
69906586	0.546586	0.403811	0.352958	0.0688703	0.234654	0.0356657	0.0514888	0.0430881	0.419303
91490554	0.546586	0.632908	0.365494	0.0694388	0.23821	0.0269461	0.0506516	0.0329804	0.432328
131849184	0.54659	0.406074	0.375527	0.261405	0.211687	0.0665742	0.577789	0.7693	0.594881
21151277	0.546824	0.249174	0.423466	0.046577	0.299171	0.141183	0.330137	0.896967	0.659942
6708804	0.547067	0.372196	0.385899	0.103494	0.228625	0.0197209	0.093292	0.0719891	0.405915
1817	0.547067	0.372196	0.385899	#N/A	0.228625	0.0197209	0.093292	0.0719891	0.405915
92236674	0.547085	0.455971	0.400542	0.267769	0.228504	0.338306	0.69141	0.789008	0.824649
481528	0.547507	0.948783	0.407971	0.0801619	0.205526	0.0160481	0.205768	0.832512	0.765717
92245604	0.547587	0.0799755	0.378373	0.0428731	0.227532	0.0400743	0.484171	0.57313	0.810169
13093729	0.547587	0.0799755	0.378373	0.0428731	0.227532	0.0400743	0.484171	0.57313	0.810169
92245606	0.547587	0.0799755	0.378373	0.0428731	0.227532	0.0400743	0.484171	0.57313	0.810169
136415743	0.547629	0.39764	0.44118	0.203803	0.287581	0.306403	0.468079	0.828653	0.873272
21732849	0.547691	0.336843	0.397377	0.0355225	0.26793	0.0714337	0.474184	0.547587	0.82711
92236455	0.54785	0.48545	0.333272	0.0235708	0.231866	0.231917	0.344001	0.245239	0.717256
6474236	0.547854	0.669561	0.399881	0.155557	0.210551	0.455981	0.353725	0.436427	0.605059
133125648	0.547854	0.669561	0.399881	0.155557	0.210551	0.455981	0.353725	0.436427	0.605059
11130341	0.547946	0.515026	0.378161	0.0476066	0.188035	0.0668457	0.541856	0.458486	0.789247
21828013	0.548174	0.404556	0.307532	0.16266	0.192855	0.0329883	0.122454	0.0671312	0.798185
92249433	0.548944	0.393452	0.432163	0.102861	0.202424	0.307807	0.617838	0.748569	0.86504
10107793	0.548944	0.393452	0.432163	0.102861	0.202424	0.307807	0.617838	0.748569	0.86504
258592	0.549108	0.339337	0.344446	0.122937	0.195897	0.0529832	0.337373	0.743761	0.585489
3007919	0.549425	0.186439	0.370014	0.0642318	0.212421	0.0379791	0.238129	0.800914	0.686646
137699672	0.549544	0.350851	0.379642	0.0576866	0.216585	0.389324	0.158624	0.388372	0.515504
493223	0.549777	0.285848	0.451253	0.266782	0.351345	0.187719	0.585363	0.948806	0.821298
5278278	0.550155	0.840469	0.407314	0.537464	0.247738	0.157634	0.545207	0.68946	0.689333
10015847	0.550573	0.541316	0.378321	0.272344	0.204836	0.134974	0.516733	0.517131	0.792516
513276	0.550741	0.1409	0.397242	0.231438	0.32539	0.0762711	0.419603	0.520429	0.44567
155290824	0.551364	0.674686	0.392185	0.2236	0.187871	0.220487	0.638239	0.746035	0.823592
21121842	0.551933	0.422519	0.403885	0.134512	0.22456	0.0296069	0.117492	0.0730763	0.497621
67763123	0.552106	0.358262	0.423369	0.0928675	0.208483	0.0231033	0.102025	0.0336817	0.428092
69886241	0.552106	0.358262	0.423369	0.0928675	0.208483	0.0231033	0.102025	0.0336817	0.428092
13564810	0.552106	0.358262	0.423369	0.0928675	0.208483	0.0231033	0.102025	0.0336817	0.428092
54336181	0.552267	0.868885	0.368132	0.264139	0.274293	0.363734	0.17485	0.280607	0.44591
21634250	0.552366	0.387616	0.402328	0.192026	0.222316	0.0989455	0.610642	0.732672	0.826155
86592810	0.552416	0.832745	0.454915	0.265294	0.355356	0.394174	0.604662	0.781022	0.700405
154701266	0.552691	0.535114	0.416822	0.542768	0.307171	0.43136	0.560235	0.839074	0.677618
5273512	0.552919	0.621302	0.448945	0.076672	0.280197	0.139328	0.475566	0.81263	0.821414
21829242	0.553081	0.457443	0.426834	0.170322	0.280056	0.301368	0.581828	0.821608	0.833825
510948	0.553334	0.130885	0.340197	0.0308472	0.276778	0.0258032	0.328299	0.820469	0.787525
121486885	0.553457	0.192353	0.424846	0.287695	0.3132	0.512673	0.575657	0.858398	0.699384
21140569	0.553967	0.115821	0.376347	0.0997743	0.175814	0.215124	0.567509	0.195078	0.483292
9824370	0.554309	0.354893	0.398378	0.048159	0.293424	0.0779519	0.322469	0.794778	0.620492
53835662	0.55434	0.550822	0.382962	0.128797	0.246148	0.0814574	0.100275	0.0477392	0.612439
204132	0.554367	0.431731	0.371183	0.185402	0.22471	0.0903948	0.383125	0.925828	0.716434
57377074	0.55446	0.25726	0.415946	0.0780715	0.238391	0.0407391	0.379644	0.291732	0.844304
4555041	0.554498	0.482034	0.375117	#N/A	0.247786	0.0210237	0.0691688	0.123161	0.473052
3010352	0.554583	0.449487	0.462823	0.135928	0.25227	0.836831	0.432436	0.94463	0.546616
511666	0.555091	0.429705	0.392449	0.119868	0.21703	0.0119386	0.283421	0.362125	0.682843
6479393	0.555315	0.199387	0.375996	0.040677	0.201945	0.390828	0.687528	0.67904	0.653843
6475823	0.555504	0.449644	0.391484	0.326861	0.327093	0.794372	0.562381	0.878476	0.832556
131881305	0.555666	0.515926	0.437599	0.0507109	0.218205	0.0683352	0.594622	0.778656	0.876196
10859187	0.555768	0.516835	0.406075	0.0605008	0.247994	0.0207098	0.0762123	0.0313776	0.577003
13188940	0.555799	0.771122	0.339733	0.0641829	0.231692	0.0950847	0.12813	0.069715	0.402689
5272663	0.556302	0.859315	0.401006	0.229233	0.17121	0.109381	0.508329	0.570334	0.551536
139026027	0.556448	0.416916	0.434641	0.102474	0.248849	0.035062	0.153546	0.0255312	0.516786
57369201	0.556448	0.416916	0.434641	0.102474	0.248849	0.035062	0.153546	0.0255312	0.516786
3010797	0.556552	0.393064	0.467866	0.173376	0.247434	0.970879	0.651686	0.954415	0.751608
131708540	0.556554	0.33278	0.464128	0.0959847	0.227435	0.0130733	0.044702	0.0197807	0.432292
70021591	0.556796	0.550621	0.467604	0.315341	0.50127	0.530616	0.471773	0.893695	0.722637
76973833	0.557036	0.35354	0.374707	0.107315	0.280692	0.278695	0.183279	0.0442283	0.562666
511886	0.557164	0.642757	0.376136	0.0613593	0.204965	0.132728	0.559903	0.546602	0.82281
14430355	0.557349	0.507185	0.44914	0.025885	0.28456	0.0623409	0.562338	0.481976	0.686555
331904	0.557349	0.507185	0.44914	0.025885	0.28456	0.0623409	0.562338	0.481976	0.686555
3011905	0.557786	0.0870475	0.403317	0.346219	0.226552	0.243676	0.480092	0.453473	0.584854
96547	0.557906	0.803904	0.401222	0.211786	0.286479	0.368597	0.559574	0.662207	0.725282
6595777	0.557906	0.803904	0.401222	0.211786	0.286479	0.368597	0.559574	0.662207	0.725282
71407349	0.557914	0.324883	0.362287	0.132073	0.207749	0.0170808	0.175969	0.0276582	0.487778
15104857	0.557956	0.227537	0.337647	0.221215	0.248834	0.0639256	0.426241	0.580508	0.728834
490310	0.558055	0.185111	0.362774	0.0954697	0.238518	0.0367961	0.318483	0.408032	0.796453
16076141	0.558427	0.175938	0.40872	0.0860306	0.227249	0.0876434	0.576149	0.901486	0.788156
282734	0.558464	0.275036	0.429012	0.0497103	0.255013	0.159339	0.601912	0.893469	0.869664
22793986	0.558624	0.449069	0.364307	0.125704	0.279358	0.373319	0.135506	0.323235	0.678829
139592726	0.558912	0.706301	0.445839	0.201804	0.297588	0.118358	0.377156	0.252278	0.857435
137699081	0.558912	0.706301	0.445839	0.201804	0.297588	0.118358	0.377156	0.252278	0.857435
77844690	0.559212	0.235069	0.355989	0.0770668	0.203249	0.1279	0.491295	0.340366	0.510107
124223956	0.559212	0.235069	0.355989	0.0770668	0.203249	0.1279	0.491295	0.340366	0.510107
21140809	0.559234	0.507727	0.393609	0.0822405	0.234156	0.054776	0.297922	0.273886	0.638948
15450939	0.559375	0.471146	0.39584	0.263839	0.197254	0.55954	0.439587	0.956438	0.716381
71539358	0.559553	0.620195	0.351149	0.0937901	0.334117	0.174378	0.269465	0.0781489	0.496801
45356917	0.559741	0.404412	0.371297	0.102474	0.235125	0.0318925	0.145298	0.0223634	0.51127
13066372	0.559741	0.404412	0.371297	0.102474	0.235125	0.0318925	0.145298	0.0223634	0.51127
9427	0.559741	0.404412	0.371297	0.102474	0.235125	0.0318925	0.145298	0.0223634	0.51127
1520351	0.559741	0.404412	0.371297	0.102474	0.235125	0.0318925	0.145298	0.0223634	0.51127
54669724	0.559741	0.404412	0.371297	0.102474	0.235125	0.0318925	0.145298	0.0223634	0.51127
13066370	0.559741	0.404412	0.371297	0.102474	0.235125	0.0318925	0.145298	0.0223634	0.51127
7059460	0.559741	0.404412	0.371297	0.102474	0.235125	0.0318925	0.145298	0.0223634	0.51127
450215	0.559741	0.404412	0.382494	0.102474	0.239446	0.0328931	0.14339	0.0231648	0.51127
101317	0.559741	0.404412	0.371297	0.102474	0.235125	0.0318925	0.145298	0.0223634	0.51127
44629859	0.559741	0.404412	0.371297	0.102474	0.235125	0.0318925	0.145298	0.0223634	0.51127
91872277	0.559741	0.409214	0.371959	0.0986676	0.233392	0.0318925	0.152075	0.0240352	0.512346
44630766	0.559741	0.404412	0.371297	0.102474	0.235125	0.0318925	0.145298	0.0223634	0.51127
121486935	0.559758	0.198655	0.352764	0.252709	0.225185	0.218481	0.0976694	0.0440062	0.379414
14408979	0.559786	0.33775	0.409909	0.0747228	0.280599	0.126224	0.475131	0.457249	0.858582
46780472	0.559832	0.330411	0.449346	0.0959847	0.226448	0.0130733	0.044387	0.0193799	0.425028
90472260	0.559832	0.330411	0.449346	0.0959847	0.226448	0.0130733	0.044387	0.0193799	0.425028
49849540	0.559832	0.330411	0.449346	0.0959847	0.226448	0.0130733	0.044387	0.0193799	0.425028
15037959	0.55996	0.391175	0.342272	0.0917395	0.263269	0.0537444	0.130438	0.0218144	0.466738
515217	0.559976	0.336522	0.416006	0.159775	0.25519	0.0224538	0.243768	0.378852	0.829583
118855918	0.560077	0.323552	0.416629	0.0959847	0.22077	0.0130124	0.0447635	0.0177796	0.42262
124202892	0.560077	0.326769	0.435734	0.0959847	0.220169	0.0138892	0.0447635	0.0179649	0.422851
156587569	0.560128	0.0450405	0.30823	0.0102969	0.222499	0.143447	0.493766	0.550561	0.730071
6327750	0.560192	0.809231	0.437963	0.197966	0.232869	0.136435	0.0325978	0.235349	0.39626
90674669	0.560234	0.778911	0.425467	0.363673	0.375088	0.354355	0.244175	0.475121	0.546223
640874	0.560509	0.189571	0.420752	0.173191	0.191866	0.11436	0.43951	0.690051	0.620909
13831580	0.560522	0.818258	0.384192	0.0666356	0.180487	0.0571747	0.399955	0.531905	0.749256
3010825	0.560722	0.295054	0.40249	0.304319	0.327962	0.74295	0.532515	0.866556	0.821069
44572473	0.560957	0.0500981	0.316276	0.015184	0.318347	0.26312	0.697947	0.286319	0.544038
451874	0.561009	0.323717	0.349322	0.147668	0.247172	0.0924669	0.354387	0.591132	0.691619
14185422	0.561009	0.323717	0.349322	0.147668	0.247172	0.0924669	0.354387	0.591132	0.691619
54263300	0.56131	0.581447	0.369158	0.245152	0.214978	0.0289339	0.290108	0.362673	0.604373
10355712	0.56131	0.581447	0.369158	0.245152	0.214978	0.0289339	0.290108	0.362673	0.604373
129395379	0.561367	0.47114	0.430739	0.0887836	0.30952	0.429881	0.670383	0.67533	0.829538
12803301	0.561367	0.47114	0.430739	0.0887836	0.30952	0.429881	0.670383	0.67533	0.829538
12803302	0.561367	0.47114	0.430739	0.0887836	0.30952	0.429881	0.670383	0.67533	0.829538
11121872	0.561505	0.419895	0.366793	0.169929	0.245348	0.129845	0.246214	0.655685	0.361085
176826	0.561577	0.352813	0.35597	0.164756	0.245085	0.0552023	0.384798	0.815887	0.737077
456570	0.561617	0.274813	0.382763	0.090706	0.281604	0.0640284	0.0358782	0.0137813	0.50391
156594560	0.561776	0.800992	0.362766	0.0966268	0.219489	0.121439	0.118619	0.120813	0.456745
131848792	0.561886	0.710261	0.402856	0.0619165	0.27911	0.441341	0.196972	0.199603	0.578182
94358774	0.561981	0.195872	0.453376	0.0785645	0.134671	0.174818	0.67309	0.291428	0.453904
121010792	0.562025	0.178503	0.298536	0.0105531	0.16263	0.36248	0.413605	0.857939	0.285183
133589974	0.562519	0.1541	0.343933	#N/A	0.269357	0.338541	0.131761	0.0630102	0.55048
118855855	0.562524	0.321736	0.418861	0.0959847	0.217744	0.0138892	0.0450811	0.0177539	0.419175
11022827	0.562637	0.51844	0.398126	0.13292	0.244376	0.183291	0.517847	0.429973	0.663354
101343952	0.562693	0.322644	0.422244	0.105801	0.222092	0.0138892	0.0460285	0.0175557	0.422018
510947	0.562917	0.156038	0.334473	0.0354931	0.255788	0.0460036	0.30257	0.954557	0.783224
5271296	0.562974	0.312192	0.416214	0.303641	0.361063	0.356699	0.474846	0.912626	0.786421
92286289	0.563025	0.737618	0.402257	0.309637	0.22039	0.328961	0.186968	0.476411	0.711845
512678	0.563288	0.833733	0.468523	0.0217257	0.248337	0.0511795	0.118113	0.0887832	0.356243
13831293	0.563397	0.747008	0.395278	0.127104	0.208856	0.315302	0.678932	0.3451	0.551368
59783293	0.563434	0.662698	0.370889	0.307423	0.21291	0.0469293	0.403892	0.313499	0.811566
40527693	0.563434	0.312132	0.357775	0.092562	0.203605	0.0413979	0.626859	0.230938	0.748854
11821635	0.563434	0.312132	0.357775	0.092562	0.203605	0.0413979	0.626859	0.230938	0.748854
96889965	0.563434	0.662698	0.370889	0.307423	0.21291	0.0469293	0.403892	0.313499	0.811566
177273	0.563434	0.662698	0.379556	0.307423	0.213244	0.0498201	0.389908	0.314875	0.811566
466420	0.563434	0.662698	0.370889	0.307423	0.21291	0.0469293	0.403892	0.313499	0.811566
2305663	0.563434	0.312132	0.357775	0.092562	0.203605	0.0413979	0.626859	0.230938	0.748854
905903	0.563434	0.312132	0.357775	0.092562	0.203605	0.0413979	0.626859	0.230938	0.748854
11065470	0.563434	0.662698	0.370889	0.307423	0.21291	0.0469293	0.403892	0.313499	0.811566
44240813	0.563434	0.662698	0.370889	0.307423	0.21291	0.0469293	0.403892	0.313499	0.811566
13873708	0.563434	0.312132	0.357775	0.092562	0.203605	0.0413979	0.626859	0.230938	0.748854
122619	0.563434	0.312132	0.357775	0.092562	0.203605	0.0413979	0.626859	0.230938	0.748854
100253	0.563434	0.662698	0.370889	0.307423	0.21291	0.0469293	0.403892	0.313499	0.811566
321729	0.563434	0.662698	0.370889	0.307423	0.21291	0.0469293	0.403892	0.313499	0.811566
512718	0.563626	0.784071	0.43312	0.38743	0.371321	0.157821	0.619124	0.934493	0.820626
9881814	0.563892	0.805592	0.32462	0.169481	0.222272	0.0893642	0.408038	0.178205	0.774484
23358719	0.563892	0.805592	0.32462	0.169481	0.222272	0.0893642	0.408038	0.178205	0.774484
490684	0.56398	0.63808	0.406003	0.500895	0.257847	0.374339	0.580489	0.625912	0.65857
5272654	0.564042	0.405759	0.410892	0.21972	0.236304	0.067041	0.615557	0.387198	0.679826
21668257	0.564063	0.802469	0.445921	0.213631	0.204428	0.0440494	0.134348	0.0285503	0.465857
67853778	0.564254	0.584339	0.309297	0.197599	0.247442	0.0451443	0.343232	0.568037	0.534652
11832095	0.564444	0.305682	0.406479	0.126348	0.240494	0.00377386	0.057076	0.0299342	0.393704
126567728	0.564502	0.691816	0.386809	0.28553	0.239135	0.0408994	0.346141	0.317812	0.816905
501519	0.564614	0.225151	0.37234	0.0364457	0.218954	0.16558	0.741138	0.434931	0.808359
135440057	0.564782	0.188265	0.390573	0.103477	0.192567	0.533518	0.202524	0.502087	0.601519
131888287	0.564828	0.425238	0.341457	0.0542972	0.206235	0.106087	0.13865	0.624306	0.282995
11727150	0.565107	0.541539	0.394168	0.170066	0.200525	0.0606412	0.179645	0.887182	0.606913
10778286	0.565565	0.671218	0.404771	0.176137	0.264674	0.0378138	0.104646	0.20056	0.478202
76973510	0.566093	0.348027	0.464134	0.101026	0.213721	0.0150059	0.0456857	0.0174695	0.421058
76973315	0.566093	0.348027	0.464134	0.101026	0.213721	0.0150059	0.0456857	0.0174695	0.421058
11747043	0.566093	0.351625	0.46392	0.105801	0.212286	0.0150059	0.0469275	0.0176743	0.421653
454531	0.5664	0.758319	0.352524	0.0245455	0.22216	0.0226327	0.357251	0.308224	0.656322
3008139	0.56642	0.339251	0.402451	0.240807	0.235021	0.34154	0.384403	0.692196	0.612701
446824	0.566458	0.397744	0.376718	0.0553533	0.229356	0.0217177	0.423265	0.290166	0.82382
4471889	0.566458	0.397744	0.376718	0.0553533	0.229356	0.0217177	0.423265	0.290166	0.82382
196709	0.566487	0.595988	0.406502	0.233728	0.28064	0.43893	0.483279	0.661539	0.532358
53463804	0.566487	0.595988	0.406502	0.233728	0.28064	0.43893	0.483279	0.661539	0.532358
17756793	0.56658	0.325963	0.400361	0.0373958	0.207024	0.0615653	0.134317	0.0323343	0.458517
10878902	0.56658	0.325963	0.400361	0.0373958	0.207024	0.0615653	0.134317	0.0323343	0.458517
46874484	0.56658	0.325963	0.400361	0.0373958	0.207024	0.0615653	0.134317	0.0323343	0.458517
100016	0.56658	0.325963	0.400361	0.0373958	0.207024	0.0615653	0.134317	0.0323343	0.458517
51380955	0.56658	0.325963	0.400361	0.0373958	0.207024	0.0615653	0.134317	0.0323343	0.458517
92970665	0.567057	0.5265	0.452751	0.0840281	0.287537	0.328376	0.434768	0.841107	0.903384
96622	0.567112	0.589823	0.370948	0.0988403	0.209787	0.00610203	0.0443585	0.00694262	0.428863
256040	0.567112	0.589823	0.370948	0.0988403	0.209787	0.00610203	0.0443585	0.00694262	0.428863
15839349	0.567112	0.589823	0.370948	0.0988403	0.209787	0.00610203	0.0443585	0.00694262	0.428863
86295119	0.567112	0.589823	0.370948	0.0988403	0.209787	0.00610203	0.0443585	0.00694262	0.428863
469074	0.567197	0.25604	0.373291	0.014978	0.164412	0.847418	0.545463	0.688507	0.693859
92234642	0.567548	0.605819	0.392717	0.0297646	0.193231	0.0979577	0.326124	0.65793	0.824405
11725011	0.567748	0.324543	0.38779	0.200652	0.271619	0.0577081	0.224604	0.533539	0.829318
71369906	0.567824	0.239615	0.402461	0.0588	0.198818	0.0992012	0.224742	0.47295	0.623002
10266795	0.567828	0.585877	0.351906	0.0655015	0.224546	0.0606746	0.0992909	0.177039	0.65577
156588427	0.568351	0.661346	0.382524	0.0923589	0.240551	0.0906933	0.238853	0.13547	0.598053
92279361	0.568432	0.589965	0.455462	0.113302	0.2018	0.00306134	0.0511755	0.0277198	0.585003
639409	0.5685	0.624505	0.390022	0.153198	0.167476	0.0621173	0.370123	0.187325	0.556636
148033	0.56891	0.0775147	0.415996	0.141875	0.317143	0.748954	0.735369	0.888057	0.69408
5270727	0.569274	0.76708	0.360995	0.338694	0.189384	0.344664	0.550686	0.560285	0.753938
121221202	0.569503	0.0782879	0.369008	0.016849	0.282436	0.256346	0.472691	0.606888	0.773509
451448	0.569558	0.473707	0.351659	0.0539819	0.274905	0.0413579	0.124273	0.0863276	0.698945
162011	0.569558	0.473707	0.351659	0.0539819	0.274905	0.0413579	0.124273	0.0863276	0.698945
452281	0.569627	0.365348	0.30111	0.0112421	0.170138	0.69577	0.430081	0.505005	0.693814
20575885	0.569675	0.272763	0.406205	0.190825	0.205212	0.0166348	0.0955282	0.0863232	0.530811
163320930	0.569819	0.622292	0.365501	0.065883	0.196827	0.0255576	0.0894696	0.00888658	0.453032
136126104	0.570214	0.694123	0.408156	0.0640387	0.214142	0.0977343	0.164304	0.408104	0.542264
135409474	0.570214	0.694123	0.408156	0.0640387	0.214142	0.0977343	0.164304	0.408104	0.542264
15516021	0.570302	0.42298	0.367592	0.130885	0.221558	0.0161095	0.123186	0.0368799	0.598857
176869	0.57071	0.673653	0.410813	0.18082	0.249537	0.0151888	0.117522	0.0827165	0.473623
511885	0.570747	0.557724	0.397474	0.0710314	0.222631	0.230783	0.337639	0.509492	0.809593
131885796	0.571227	0.151224	0.425557	0.0727105	0.190058	0.11857	0.692108	0.4356	0.540369
21821194	0.571245	0.558929	0.339276	0.0936557	0.222066	0.0195003	0.0901375	0.0344165	0.664727
21820756	0.571718	0.383064	0.400677	0.0423742	0.209288	0.0482285	0.330781	0.520818	0.645043
92234054	0.571718	0.383064	0.400677	0.0423742	0.209288	0.0482285	0.330781	0.520818	0.645043
92237996	0.572159	0.412492	0.298855	0.0772388	0.27079	0.173743	0.214715	0.0919086	0.675502
14558097	0.572184	0.480927	0.395403	0.143699	0.211016	0.0385363	0.0934066	0.0979382	0.482393
17756742	0.572386	0.275597	0.423884	0.21931	0.253376	0.396393	0.0547123	0.0699557	0.553351
15729467	0.572387	0.0734942	0.358126	0.101122	0.211425	0.0655285	0.120304	0.0237969	0.36317
324452	0.572398	0.497668	0.433818	#N/A	0.282174	0.0851569	0.155177	0.0494733	0.564062
10065192	0.572681	0.80498	0.401936	0.474704	0.277192	0.313808	0.481879	0.664704	0.555042
92264741	0.572681	0.80498	0.401936	0.474704	0.277192	0.313808	0.481879	0.664704	0.555042
471865	0.572905	0.435748	0.354195	0.0330097	0.228755	0.694252	0.722887	0.248722	0.717254
6531437	0.572905	0.435748	0.354195	#N/A	0.228755	0.694252	0.722887	0.248722	0.717254
93982631	0.573	0.235994	0.373179	0.211533	0.135112	0.0318035	0.249272	0.148618	0.363517
3065118	0.57304	0.932296	0.390784	0.0896905	0.193483	0.0706018	0.317095	0.100308	0.592422
455182	0.573179	0.782353	0.340872	0.145111	0.237062	0.0121887	0.145842	0.792304	0.385753
454533	0.573179	0.782353	0.340872	0.145111	0.237062	#N/A	0.145842	0.792304	0.385753
454534	0.573179	0.782353	0.340872	0.145111	0.237062	#N/A	0.145842	0.792304	0.385753
9570	0.573252	0.610316	0.399131	0.0340028	0.224821	0.0323556	0.521207	0.698531	0.830731
111261	0.573252	0.610316	0.399131	0.0340028	0.224821	0.0323556	0.521207	0.698531	0.830731
92223676	0.573252	0.610316	0.399131	0.0340028	0.224821	0.0323556	0.521207	0.698531	0.830731
23616817	0.573252	0.610316	0.399131	0.0340028	0.224821	0.0323556	0.521207	0.698531	0.830731
163947	0.573297	0.75868	0.378544	0.300179	0.233457	0.599917	0.360054	0.846872	0.426409
466039	0.573386	0.802998	0.460272	0.0645894	0.18126	0.0327616	0.275894	0.256527	0.481489
121486915	0.573413	0.290348	0.386612	0.0684623	0.175522	0.180265	0.274441	0.263659	0.688649
11812423	0.573814	0.216503	0.401784	0.0557144	0.294195	0.0816488	0.256963	0.813037	0.611434
3080604	0.574461	0.163496	0.39719	0.0382597	0.206152	0.0619561	0.333966	0.607366	0.673642
604832	0.57513	0.1353	0.458129	0.352007	0.207388	0.48596	0.538113	0.738952	0.818884
14367013	0.575223	0.759819	0.372526	0.0978222	0.205275	0.0226149	0.110541	0.011108	0.485224
7282398	0.575223	0.759819	0.372526	0.0978222	0.205275	0.0226149	0.110541	0.011108	0.485224
118312477	0.575223	0.759819	0.372526	0.0978222	0.205275	0.0226149	0.110541	0.011108	0.485224
169704	0.575223	0.759819	0.372526	0.0978222	0.205275	0.0226149	0.110541	0.011108	0.485224
21824456	0.575223	0.759819	0.372526	0.0978222	0.205275	0.0226149	0.110541	0.011108	0.485224
7282400	0.575223	0.759819	0.372526	#N/A	0.205275	0.0226149	0.110541	0.011108	0.485224
1265899	0.575223	0.759819	0.372526	0.0978222	0.205275	0.0226149	0.110541	0.011108	0.485224
452061	0.575307	0.724498	0.386645	0.132921	0.223802	0.612187	0.441704	0.634628	0.597637
14409039	0.575307	0.724498	0.386645	0.132921	0.223802	0.612187	0.441704	0.634628	0.597637
121486745	0.575427	0.41986	0.38393	0.324285	0.391607	0.561283	0.410414	0.855733	0.688091
126704	0.575432	0.0900387	0.343675	0.166269	0.250357	0.054283	0.687796	0.448349	0.808006
469184	0.575432	0.0900387	0.343675	0.166269	0.250357	0.054283	0.687796	0.448349	0.808006
131850520	0.575511	0.494643	0.376511	0.095494	0.165092	0.126672	0.558806	0.515087	0.794614
3010387	0.575604	0.649346	0.399597	0.213412	0.307276	0.164228	0.452501	0.877261	0.818737
50987538	0.575705	0.325077	0.399351	0.356813	0.217917	0.333883	0.672295	0.696605	0.833516
512719	0.575705	0.325077	0.399351	0.356813	0.217917	0.333883	0.672295	0.696605	0.833516
490433	0.575769	0.067244	0.326388	0.0714842	0.257847	0.088439	0.645805	0.607332	0.804659
73478	0.575916	0.805526	0.347966	#N/A	0.203055	0.0142669	0.0701959	0.0441951	0.715862
3010378	0.575968	0.365597	0.439729	0.0794763	0.22899	0.300793	0.736014	0.581883	0.869872
92339825	0.575968	0.365597	0.439729	0.0794763	0.22899	0.300793	0.736014	0.581883	0.869872
136592262	0.576309	0.850354	0.375322	0.121599	0.193177	0.0635842	0.110294	0.590352	0.581905
24885222	0.576339	0.192741	0.382491	0.306518	0.234651	0.0398521	0.146375	0.118344	0.622817
3010291	0.576393	0.716265	0.389507	0.158201	0.288188	0.0587699	0.29058	0.491229	0.746612
512135	0.576637	0.753367	0.432688	0.179564	0.218844	0.100014	0.665732	0.772017	0.831444
92253117	0.576826	0.334559	0.397005	0.163022	0.269811	0.170879	0.110229	0.0845089	0.37327
57358089	0.576826	0.334559	0.397005	0.163022	0.269811	0.170879	0.110229	0.0845089	0.37327
92236430	0.57698	0.359856	0.407931	0.247479	0.230024	0.174803	0.643302	0.498155	0.818504
10467227	0.577082	0.800167	0.395213	0.160308	0.246763	0.234953	0.615047	0.367974	0.761814
14162719	0.577471	0.346915	0.33078	0.106713	0.244563	0.0249141	0.308349	0.694718	0.81365
3081162	0.577471	0.346915	0.33078	0.106713	0.244563	0.0249141	0.308349	0.694718	0.81365
162642336	0.577505	0.610774	0.397822	0.0340028	0.224821	0.0323556	0.521207	0.706415	0.83121
14730263	0.577559	0.307965	0.376231	0.160109	0.313446	0.0609368	0.375023	0.93186	0.78046
135788877	0.578684	0.618734	0.391865	0.123146	0.269178	0.18033	0.0708941	0.586463	0.570419
21821293	0.578808	0.173865	0.419038	0.0305146	0.173961	0.213655	0.387089	0.403311	0.629136
69907861	0.578819	0.0555058	0.36416	0.0618801	0.233043	0.0052122	0.181286	0.0481936	0.37268
455180	0.578924	0.906845	0.367727	0.0405328	0.179933	0.0227991	0.168023	0.45232	0.654089
21145872	0.578924	0.906845	0.367727	0.0405328	0.179933	0.0227991	0.168023	0.45232	0.654089
10400774	0.578924	0.906845	0.367727	0.0405328	0.179933	#N/A	0.168023	0.45232	0.654089
10445690	0.578924	0.906845	0.367727	0.0405328	0.179933	#N/A	0.168023	0.45232	0.654089
14156718	0.578931	0.721776	0.369741	0.197479	0.214147	0.318167	0.222098	0.546175	0.627688
15119224	0.579078	0.351907	0.408556	0.0733988	0.229643	0.201431	0.448201	0.711239	0.666098
129674064	0.579101	0.50951	0.437182	0.105696	0.266886	0.504817	0.621495	0.440176	0.668971
22880825	0.579155	0.61665	0.431222	0.181513	0.261065	0.0665823	0.638206	0.74311	0.691818
481527	0.579228	0.850378	0.390574	0.268193	0.253738	0.0398447	0.349552	0.878526	0.772858
156594202	0.579253	0.265173	0.365221	0.242863	0.343335	0.567495	0.396562	0.835951	0.724874
3011900	0.579406	0.234374	0.400539	0.37623	0.228382	0.618374	0.50505	0.702414	0.791441
9885936	0.579743	0.122408	0.357592	0.139192	0.30329	0.235167	0.766221	0.954886	0.796281
355033	0.579874	0.0737146	0.32978	0.0336816	0.136917	0.0426705	0.167155	0.576082	0.304135
21826754	0.579908	0.163981	0.416971	0.135291	0.282663	0.0826793	0.140515	0.0135902	0.429763
92252368	0.579908	0.163981	0.416971	0.135291	0.282663	0.0826793	0.140515	0.0135902	0.429763
117647970	0.579938	0.306789	0.404322	0.12901	0.217709	0.00709495	0.155283	0.0386624	0.404472
53759423	0.579974	0.805941	0.437366	0.0516262	0.235159	0.0179586	0.0855015	0.0389263	0.330408
11849876	0.580019	0.438366	0.380631	0.0828161	0.245181	0.0192622	0.196906	0.061068	0.392063
134715452	0.580076	0.933023	0.360986	0.090076	0.239122	0.191592	0.0902509	0.375576	0.566729
14310518	0.580106	0.831598	0.373314	0.214764	0.26538	0.292718	0.332226	0.254499	0.656967
14498611	0.580106	0.648515	0.356531	0.192645	0.262083	0.284111	0.404221	0.203046	0.564139
500903	0.580194	0.202619	0.39312	0.37779	0.230052	0.0305137	0.0690277	0.0243988	0.414545
13830457	0.580194	0.202619	0.39312	0.37779	0.230052	0.0305137	0.0690277	0.0243988	0.414545
137705912	0.580194	0.202619	0.39312	0.37779	0.230052	0.0305137	0.0690277	0.0243988	0.414545
54180064	0.580334	0.252771	0.389062	0.108159	0.224892	0.715203	0.14731	0.647534	0.526659
23519662	0.580444	0.482969	0.402653	0.299674	0.234809	0.123431	0.103833	0.0554274	0.556866
10849717	0.580479	0.50877	0.409293	0.315692	0.216388	0.0710826	0.132418	0.0691565	0.552331
278758	0.580524	0.62067	0.421376	0.0536258	0.241233	0.0897461	0.337708	0.524368	0.72804
21677555	0.580593	0.867983	0.302401	0.0572172	0.349304	0.174091	0.28948	0.439104	0.403873
5273506	0.580701	0.626153	0.406783	0.0473293	0.210918	0.032115	0.397454	0.716149	0.800448
59504000	0.580855	0.160984	0.418102	0.18148	0.201335	0.0295825	0.100227	0.0977154	0.52117
59504127	0.580855	0.160984	0.418102	0.18148	0.201335	0.0295825	0.100227	0.0977154	0.52117
59504108	0.580855	0.160984	0.418102	0.18148	0.201335	0.0295825	0.100227	0.0977154	0.52117
58463530	0.580894	0.213899	0.40764	0.37779	0.232492	0.0305137	0.0636843	0.0257242	0.423451
6479205	0.581269	0.556595	0.415988	0.250113	0.201846	0.594606	0.499228	0.678482	0.710026
121486746	0.581271	0.850889	0.407187	0.0580526	0.215556	0.0815534	0.230744	0.529772	0.618429
452081	0.581448	0.523431	0.35204	0.132364	0.207044	0.111957	0.247963	0.514869	0.400701
163320836	0.581473	0.295754	0.395845	0.157866	0.235956	0.23185	0.438836	0.517831	0.60612
14102245	0.581473	0.295754	0.395845	0.157866	0.235956	0.23185	0.438836	0.517831	0.60612
54703164	0.581542	0.677687	0.421187	0.103723	0.234809	0.0177827	0.0573329	0.0312343	0.463209
92299334	0.581542	0.677687	0.421187	0.103723	0.234809	0.0177827	0.0573329	0.0312343	0.463209
54677885	0.581542	0.677687	0.421187	0.103723	0.234809	0.0177827	0.0573329	0.0312343	0.463209
121487026	0.581641	0.345689	0.441071	0.181653	0.200248	0.176671	0.0474664	0.0626181	0.567457
5271786	0.581723	0.388527	0.360975	0.130298	0.173453	0.113146	0.233474	0.495457	0.374224
13712878	0.581732	0.378697	0.394947	0.317554	0.202755	0.287879	0.69111	0.700171	0.850242
478561	0.582059	0.576222	0.448715	0.0381736	0.248464	0.284145	0.387593	0.238177	0.747484
92132205	0.582267	0.161037	0.384352	0.0925024	0.256188	0.0294412	0.558558	0.846482	0.802264
124428631	0.582267	0.161037	0.384352	0.0925024	0.256188	0.0294412	0.558558	0.846482	0.802264
27191376	0.582267	0.161037	0.384352	0.0925024	0.256188	0.0294412	0.558558	0.846482	0.802264
29982343	0.582267	0.161037	0.384352	0.0925024	0.256188	0.0294412	0.558558	0.846482	0.802264
107502	0.582267	0.161037	0.384352	0.0925024	0.256188	0.0294412	0.558558	0.846482	0.802264
45039580	0.582267	0.161037	0.384352	0.0925024	0.256188	0.0294412	0.558558	0.846482	0.802264
492409	0.582838	0.154318	0.32824	0.0323701	0.293671	0.0164028	0.289498	0.910489	0.783052
6334060	0.582891	0.402366	0.417379	0.0756235	0.220042	0.517651	0.528655	0.463633	0.71152
10106801	0.582977	0.48364	0.372189	0.104237	0.275904	0.0271749	0.191934	0.255008	0.811801
71346314	0.582977	0.48364	0.372189	0.104237	0.275904	0.0271749	0.191934	0.255008	0.811801
45484443	0.583128	0.237853	0.404737	0.0628807	0.291719	0.0240428	0.33339	0.927054	0.69203
126567807	0.583669	0.53327	0.374027	0.418151	0.185216	0.0156555	0.352656	0.478315	0.638083
92143143	0.583772	0.53849	0.417345	0.0635549	0.148545	0.0434655	0.330327	0.216988	0.503231
492408	0.583842	0.25555	0.329296	0.0424794	0.256272	0.0255794	0.237135	0.65539	0.785433
3082596	0.58423	0.549912	0.397681	0.353548	0.192617	0.229581	0.158273	0.159864	0.61343
18604151	0.584303	0.254046	0.406227	0.139363	0.231366	0.0501014	0.112196	0.0322009	0.657003
131884916	0.584417	0.194164	0.426032	0.181934	0.246366	0.492537	0.763117	0.766086	0.627349
10490949	0.584555	0.563452	0.365325	0.0474297	0.23009	0.0605342	0.282559	0.484857	0.698508
10705876	0.584555	0.563452	0.365325	0.0474297	0.23009	0.0605342	0.282559	0.484857	0.698508
95121	0.584574	0.117952	0.295908	0.00896981	0.176975	0.647611	0.362061	0.82815	0.575809
23238948	0.584718	0.538911	0.407267	0.141473	0.212229	0.0241575	0.111386	0.0311067	0.443257
6334197	0.584921	0.34428	0.375071	0.224265	0.214694	0.272603	0.275724	0.734756	0.692937
131884919	0.585089	0.528242	0.431411	0.309742	0.377831	0.382651	0.775354	0.889273	0.650482
44438827	0.585223	0.552633	0.41448	0.136639	0.258219	0.0800779	0.0696802	0.0311436	0.461535
196459	0.585345	0.503306	0.383309	0.200355	0.303758	0.0211906	0.484388	0.640832	0.811826
5273015	0.585345	0.73341	0.375272	0.0432995	0.349936	0.0344401	0.422511	0.465223	0.768025
387072	0.585347	0.430241	0.391921	0.0161839	0.179189	0.521343	0.796142	0.629544	0.769264
189148	0.585509	0.590591	0.441583	0.131497	0.180899	0.0428544	0.0975531	0.0185615	0.525325
150619	0.585544	0.470686	0.401036	0.106187	0.228518	0.0242974	0.0595452	0.0395469	0.414016
266482	0.585674	0.39305	0.379599	0.0805891	0.171138	0.0429056	0.269997	0.6058	0.475926
163285434	0.585693	0.534683	0.431061	0.0539819	0.270329	0.0409343	0.113676	0.107177	0.700075
22880806	0.585759	0.767267	0.42411	0.37371	0.268493	0.181641	0.467283	0.808989	0.675451
131843075	0.586422	0.233737	0.320105	0.0378814	0.370617	0.334832	0.641431	0.328934	0.727445
21140290	0.586803	0.628775	0.426367	0.482971	0.276811	0.23244	0.679024	0.84682	0.875787
53792010	0.586934	0.272997	0.368756	0.05851	0.27277	0.0213911	0.0572949	0.0225829	0.383378
21769885	0.586936	0.186752	0.388904	0.343368	0.22064	0.387854	0.109595	0.0855625	0.564614
15172905	0.586974	0.530947	0.383686	0.15509	0.246806	0.257768	0.313632	0.707376	0.406134
57324057	0.587045	0.452018	0.402291	0.0767209	0.262628	0.359169	0.427822	0.472535	0.81445
96851	0.587045	0.452018	0.402291	0.0767209	0.262628	0.359169	0.427822	0.472535	0.81445
15172876	0.587247	0.622708	0.392749	0.183638	0.264772	0.259015	0.187047	0.740543	0.631171
92234638	0.587284	0.413962	0.403162	0.0301394	0.248052	0.0271304	0.441467	0.624738	0.835858
21139659	0.587284	0.413962	0.403162	0.0301394	0.248052	0.0271304	0.441467	0.624738	0.835858
46875748	0.58739	0.627814	0.390274	0.616338	0.251375	0.19804	0.772153	0.872989	0.834971
14978	0.58739	0.627814	0.390274	0.616338	0.251375	0.19804	0.772153	0.872989	0.834971
3007220	0.58739	0.627814	0.390274	0.616338	0.251375	0.19804	0.772153	0.872989	0.834971
92209900	0.58739	0.627814	0.390274	0.616338	0.251375	0.19804	0.772153	0.872989	0.834971
135519069	0.58763	0.701507	0.357221	0.132351	0.169274	0.0464849	0.123204	0.693299	0.561988
135704021	0.58763	0.701507	0.357221	0.132351	0.169274	0.0464849	0.123204	0.693299	0.561988
121487517	0.587695	0.554047	0.379049	0.111355	0.200804	0.0606901	0.0931411	0.0135915	0.574109
135427250	0.588087	0.826297	0.324528	0.0665796	0.246346	0.211793	0.0884435	0.321061	0.495142
53775732	0.588259	0.325313	0.414443	0.0959847	0.217401	0.0144696	0.0447132	0.0180716	0.412589
3007909	0.588377	0.615955	0.380876	0.437218	0.242214	0.0192567	0.115382	0.0336571	0.4973
124565863	0.588401	0.0749369	0.29689	0.0221578	0.187746	0.76434	0.549413	0.550785	0.578096
58451159	0.588401	0.0749369	0.29689	0.0221578	0.187746	0.76434	0.549413	0.550785	0.578096
135405922	0.588504	0.767297	0.407638	0.209445	0.331466	0.262109	0.0992392	0.253352	0.506677
135455558	0.588818	0.658349	0.395127	0.122278	0.205212	0.856057	0.187297	0.616929	0.653175
135459781	0.588818	0.658349	0.395127	0.122278	0.205212	0.856057	0.187297	0.616929	0.653175
481518	0.588895	0.839128	0.377551	0.152541	0.312905	0.0303909	0.102567	0.242737	0.458891
14541163	0.588962	0.371673	0.380278	0.0718579	0.246595	0.0449025	0.36384	0.765231	0.719837
452054	0.588962	0.371673	0.380278	0.0718579	0.246595	0.0449025	0.36384	0.765231	0.719837
452051	0.588962	0.371673	0.380278	0.0718579	0.246595	0.0449025	0.36384	0.765231	0.719837
511984	0.589329	0.84954	0.453349	0.244361	0.262072	0.0084056	0.126768	0.363781	0.460513
3010383	0.589378	0.791002	0.417806	0.262365	0.260513	0.4157	0.764639	0.83634	0.824681
15104850	0.589484	0.893625	0.332378	0.160264	0.278619	0.0753971	0.297243	0.502869	0.659345
10977550	0.589739	0.112984	0.330965	0.113638	0.214146	0.0486557	0.182982	0.0575176	0.636361
44355029	0.590234	0.268809	0.392472	0.158007	0.244594	0.0196271	0.512344	0.716265	0.763892
137176604	0.590373	0.694377	0.431702	0.100531	0.319143	0.0705015	0.313149	0.932648	0.825519
57105083	0.590388	0.821784	0.380704	0.17978	0.276112	0.158904	0.528622	0.483727	0.793046
139025303	0.59068	0.5879	0.425132	0.0804652	0.239508	0.0134865	0.0809847	0.0266556	0.419777
46781591	0.59068	0.5879	0.425132	0.0804652	0.239508	0.0134865	0.0809847	0.0266556	0.419777
10563947	0.590707	0.172375	0.397222	0.33798	0.252489	0.140314	0.0849527	0.0371474	0.456837
126961829	0.590762	0.323477	0.437191	0.194402	0.263876	0.505696	0.784617	0.810646	0.633047
3010384	0.591248	0.543458	0.410362	0.510908	0.289477	0.357336	0.55788	0.842608	0.8196
92246004	0.591248	0.543458	0.410362	0.510908	0.289477	0.357336	0.55788	0.842608	0.8196
510946	0.591334	0.21301	0.325144	0.0456034	0.215823	0.0211878	0.2349	0.779518	0.77325
11173202	0.591449	0.51382	0.430402	0.111318	0.235872	0.152062	0.513246	0.320313	0.662674
56987376	0.591452	0.303274	0.309912	0.0473898	0.288747	0.223062	0.568028	0.788619	0.585555
512137	0.591497	0.829684	0.435743	0.0710876	0.23693	0.0272441	0.378998	0.578242	0.858537
451365	0.591517	0.427897	0.327313	0.178044	0.193191	0.115035	0.332309	0.398424	0.351075
14308796	0.591517	0.427897	0.327313	0.178044	0.193191	0.115035	0.332309	0.398424	0.351075
122088	0.591517	0.427897	0.327313	0.178044	0.193191	0.115035	0.332309	0.398424	0.351075
21140410	0.591756	0.821264	0.414665	0.0438795	0.223448	0.0332818	0.301375	0.592358	0.842152
135600340	0.592174	0.79783	0.389016	0.150061	0.2351	0.111146	0.195601	0.413501	0.597607
136663945	0.592174	0.79783	0.389016	0.150061	0.2351	0.111146	0.195601	0.413501	0.597607
502244	0.5922	0.153364	0.289251	0.0533599	0.180424	0.0333453	0.35263	0.0778314	0.514971
3006926	0.592533	0.472998	0.327017	0.0208653	0.239137	0.0326466	0.208508	0.0485297	0.645503
91809617	0.592673	0.85204	0.396503	0.482608	0.35685	0.343634	0.464422	0.818576	0.524374
102339225	0.592879	0.484637	0.39116	0.190852	0.254632	0.19814	0.189567	0.918065	0.57889
137937484	0.593059	0.332162	0.401292	0.410412	0.204107	0.103495	0.24192	0.781792	0.379912
14061175	0.593059	0.332162	0.401292	0.410412	0.204107	0.103495	0.24192	0.781792	0.379912
5270589	0.593185	0.541032	0.368054	0.127558	0.24719	0.0143487	0.0864999	0.0166208	0.377502
97297	0.593208	0.693373	0.410674	0.534456	0.347659	0.451374	0.693808	0.923426	0.838685
45039587	0.593208	0.693373	0.410674	0.534456	0.347659	0.451374	0.693808	0.923426	0.838685
25880707	0.593208	0.693373	0.410674	0.534456	0.347659	0.451374	0.693808	0.923426	0.838685
6419781	0.593208	0.693373	0.410674	0.534456	0.347659	0.451374	0.693808	0.923426	0.838685
5273750	0.593289	0.784578	0.415913	0.259831	0.207577	0.076077	0.111128	0.0504088	0.685031
492407	0.5937	0.263959	0.328444	0.0359998	0.247243	0.01398	0.207986	0.89539	0.795447
506144	0.593854	0.755253	0.377241	0.29202	0.208887	0.179846	0.397957	0.414915	0.789002
453994	0.593854	0.952472	0.467325	0.206363	0.285346	0.22857	0.280558	0.862695	0.564274
355900	0.593854	0.952472	0.467325	0.206363	0.285346	0.22857	0.280558	0.862695	0.564274
135625267	0.593868	0.839858	0.386584	0.153655	0.208931	0.215503	0.197115	0.273828	0.616078
7116198	0.593918	0.450451	0.42918	0.040261	0.253687	0.168442	0.628425	0.370369	0.874235
6561296	0.593918	0.450451	0.42918	0.040261	0.253687	0.168442	0.628425	0.370369	0.874235
7075199	0.593918	0.450451	0.42918	0.040261	0.253687	0.168442	0.628425	0.370369	0.874235
453689	0.594017	0.466476	0.348539	0.127534	0.223614	0.131613	0.376531	0.694528	0.403745
71374940	0.594082	0.560718	0.35061	0.0718263	0.235978	0.0538303	0.141582	0.10168	0.461672
14367015	0.594237	0.776361	0.312759	0.117928	0.250692	0.037398	0.138741	0.0117869	0.494888
14367014	0.594237	0.776361	0.312759	#N/A	0.250692	0.037398	0.138741	0.0117869	0.494888
11043123	0.594274	0.227435	0.334468	0.0496313	0.214252	0.0977587	0.390722	0.694479	0.648962
46876980	0.594274	0.227435	0.334468	0.0496313	0.214252	0.0977587	0.390722	0.694479	0.648962
464378	0.594342	0.112873	0.399686	0.418751	0.217414	0.488731	0.313862	0.804646	0.64445
510998	0.594539	0.586207	0.401012	0.184097	0.202759	0.0802047	0.0799751	0.0399514	0.417728
6481831	0.595078	0.34905	0.349996	0.219163	0.199016	0.069893	0.12635	0.052624	0.612444
97454	0.595417	0.260426	0.378241	0.290318	0.169808	0.341483	0.403405	0.373511	0.685353
16747775	0.595593	0.425325	0.328173	0.0728473	0.204667	0.0301424	0.0909852	0.053695	0.646032
10778285	0.596174	0.255711	0.386162	0.372177	0.264486	0.0517979	0.111789	0.0996254	0.476219
132073959	0.596174	0.255711	0.386162	0.372177	0.264486	0.0517979	0.111789	0.0996254	0.476219
89998825	0.596174	0.255711	0.386162	0.372177	0.264486	0.0517979	0.111789	0.0996254	0.476219
455669	0.596255	0.471429	0.386937	0.0616858	0.181985	0.0109075	0.526034	0.203287	0.683277
121487082	0.596507	0.317064	0.441858	0.0832155	0.23887	0.0278411	0.0452494	0.0319888	0.427954
121487083	0.596507	0.317064	0.441858	0.0832155	0.23887	0.0278411	0.0452494	0.0319888	0.427954
92268298	0.596715	0.547293	0.380554	0.0983339	0.237093	0.148438	0.127893	0.0771593	0.597485
92228261	0.596741	0.285324	0.388229	0.0667557	0.201967	0.103048	0.178395	0.645817	0.616747
44451143	0.596741	0.285324	0.388229	0.0667557	0.201967	0.103048	0.178395	0.645817	0.616747
97235	0.596809	0.444174	0.421066	0.0864417	0.169815	0.13123	0.578457	0.485926	0.801731
92244157	0.596809	0.444174	0.421066	0.0864417	0.169815	0.13123	0.578457	0.485926	0.801731
10833407	0.596942	0.86312	0.42671	0.313968	0.308924	0.523074	0.69081	0.880097	0.754392
97199	0.596945	0.431265	0.4048	0.0437913	0.194371	0.0543245	0.543131	0.747043	0.809575
512131	0.596945	0.431265	0.4048	0.0437913	0.194371	0.0543245	0.543131	0.747043	0.809575
446940	0.597008	0.702594	0.435205	0.463331	0.323747	0.608494	0.709271	0.888431	0.841615
5272744	0.597176	0.255524	0.364154	0.152668	0.213591	0.0203697	0.150506	0.0510898	0.451489
447069	0.597233	0.141243	0.34295	0.022418	0.290236	0.230752	0.189464	0.224213	0.873161
3011904	0.59728	0.126501	0.404586	0.224815	0.219487	0.519649	0.374665	0.248884	0.604469
71487589	0.597412	0.118616	0.411006	0.299836	0.178987	0.356856	0.47036	0.529362	0.770328
136250325	0.597663	0.833827	0.404869	0.363034	0.244554	0.193856	0.12486	0.615106	0.604511
71371890	0.597666	0.602115	0.419395	0.110163	0.230962	0.0921362	0.375862	0.713031	0.754276
131844007	0.597773	0.564593	0.431279	0.0501198	0.159925	0.256635	0.493283	0.0497717	0.522663
98911	0.597775	0.289073	0.405362	0.0966621	0.253358	0.0874843	0.0627859	0.00990608	0.546512
135959544	0.59794	0.584973	0.364384	0.0631288	0.248558	0.0952829	0.146695	0.137349	0.547921
131875799	0.598185	0.65286	0.383339	0.104638	0.233184	0.0686125	0.134749	0.197758	0.629123
688364	0.598313	0.431113	0.369576	0.126776	0.207223	0.0724277	0.0450933	0.0120994	0.490502
111081	0.598313	0.431113	0.369576	0.126776	0.207223	0.0724277	0.0450933	0.0120994	0.490502
482510	0.598344	0.658132	0.377222	0.170968	0.205731	0.175099	0.706787	0.475577	0.801235
129893514	0.598551	0.700202	0.404763	0.308261	0.225331	0.670189	0.382972	0.458077	0.675677
121486926	0.598819	0.226081	0.406778	0.142736	0.307451	0.453066	0.698523	0.787537	0.698346
470797	0.599103	0.87944	0.407429	0.0586255	0.233104	0.190365	0.424233	0.429763	0.749751
391259	0.599103	0.87944	0.407429	0.0586255	0.233104	0.190365	0.424233	0.429763	0.749751
10848780	0.599106	0.794888	0.417038	0.177051	0.264295	0.0116621	0.0453964	0.0271182	0.398604
72195	0.599214	0.397149	0.348412	0.202283	0.186696	0.521264	0.348802	0.741889	0.359979
22027846	0.599214	0.397149	0.348412	0.202283	0.186696	0.521264	0.348802	0.741889	0.359979
510970	0.599264	0.38434	0.364892	0.120911	0.268032	0.0277362	0.0832223	0.0140264	0.40453
501518	0.599388	0.188859	0.35995	0.0320646	0.18278	0.194883	0.771344	0.632089	0.807654
512706	0.599492	0.556805	0.394335	0.10958	0.18541	0.0927564	0.405093	0.409772	0.761389
22899187	0.59992	0.694834	0.431176	0.108802	0.207335	0.0682132	0.12068	0.0242648	0.61567
135771870	0.600033	0.931024	0.375978	0.166783	0.267529	0.153022	0.108699	0.476985	0.55031
11779374	0.600045	0.285998	0.364646	0.0274901	0.168697	0.0788309	0.259634	0.70632	0.791395
21140827	0.600356	0.309409	0.433674	0.215933	0.267281	0.716028	0.827275	0.811334	0.804386
91926387	0.600552	0.946847	0.416054	0.179009	0.234733	0.374648	0.483097	0.836207	0.593934
14999717	0.600615	0.334694	0.452776	0.486612	0.254817	0.162192	0.253381	0.876598	0.477988
92249436	0.600703	0.586246	0.444905	0.0981252	0.135287	0.0494462	0.494032	0.152921	0.546096
15613706	0.600703	0.586246	0.444905	0.0981252	0.135287	0.0494462	0.494032	0.152921	0.546096
9878327	0.600963	0.62979	0.389707	0.126405	0.22634	0.00797706	0.0632199	0.0317256	0.373426
5272743	0.601232	0.31365	0.35572	0.131617	0.257865	0.358224	0.202781	0.0787154	0.565103
131883949	0.60125	0.292998	0.398969	0.175422	0.231634	0.230168	0.556672	0.538939	0.800106
131858038	0.60125	0.292998	0.398969	0.175422	0.231634	0.230168	0.556672	0.538939	0.800106
92266557	0.60125	0.292998	0.398969	0.175422	0.231634	0.230168	0.556672	0.538939	0.800106
228966	0.601371	0.13908	0.330842	0.0214376	0.160871	0.850675	0.394145	0.782774	0.596263
124301793	0.601371	0.13908	0.330842	0.0214376	0.160871	0.850675	0.394145	0.782774	0.596263
13108042	0.60151	0.551973	0.342168	0.0955181	0.182537	0.195815	0.2333	0.904527	0.55498
5272210	0.601513	0.31132	0.444527	0.150989	0.21738	0.0112462	0.256093	0.601847	0.552092
25030767	0.601531	0.149457	0.375599	0.106848	0.24147	0.049642	0.371962	0.552554	0.768854
446658	0.60162	0.762126	0.436608	0.0457626	0.234741	0.179571	0.474811	0.409789	0.832556
59180612	0.60178	0.0923191	0.332885	0.0679299	0.249801	0.159983	0.18789	0.0115335	0.473239
76974600	0.601851	0.298616	0.374491	0.0778894	0.288974	0.0444432	0.15691	0.0231587	0.437219
136236455	0.601976	0.901849	0.394356	0.304951	0.25389	0.184705	0.103736	0.911381	0.615336
71539360	0.602161	0.402595	0.393454	0.0446796	0.227298	0.590695	0.299597	0.362686	0.651341
130209	0.602684	0.629022	0.431331	0.0792576	0.286316	0.0958914	0.575499	0.477467	0.671524
472633	0.60287	0.01575	0.322902	0.0257184	0.186295	0.369805	0.715626	0.398155	0.752858
122130429	0.603067	0.499488	0.38142	0.0718947	0.246995	0.0936406	0.213418	0.176818	0.596948
15119214	0.603232	0.303872	0.411233	0.210143	0.291433	0.100437	0.352633	0.859348	0.708779
10612861	0.603276	0.825126	0.436375	0.162786	0.213527	0.0364471	0.0713995	0.403863	0.442917
189108	0.603309	0.354477	0.356463	0.110359	0.227801	0.0991887	0.094978	0.0393697	0.55479
162660830	0.603362	0.718495	0.39242	0.287711	0.224749	0.0863782	0.634323	0.6666	0.837867
6560416	0.60337	0.311734	0.39908	0.123508	0.255897	0.0603179	0.255871	0.198741	0.831181
490438	0.603376	0.239302	0.33317	0.0218872	0.185222	0.0452399	0.431909	0.338454	0.783446
91483617	0.603958	0.522249	0.401775	0.233815	0.213886	0.502025	0.514296	0.619016	0.708538
57173805	0.604154	0.61179	0.36934	0.0775834	0.235348	0.0365008	0.140067	0.0539793	0.464585
146674828	0.604424	0.43519	0.403597	0.138793	0.236959	0.0332182	0.229317	0.535988	0.537241
44567065	0.60457	0.274204	0.388691	0.120392	0.219855	0.358043	0.200346	0.137769	0.512424
121487118	0.604814	0.911757	0.473785	#N/A	0.284645	0.0587488	0.227283	0.0849397	0.553272
54683691	0.604834	0.768743	0.48532	0.125857	0.245157	0.0395152	0.124177	0.0672882	0.588062
124526965	0.604888	0.528942	0.37716	#N/A	0.230585	0.0436201	0.0874888	0.0234842	0.378926
57453626	0.604888	0.528942	0.37716	0.305782	0.230585	0.0436201	0.0874888	0.0234842	0.378926
118703664	0.604888	0.528942	0.37716	0.305782	0.230585	0.0436201	0.0874888	0.0234842	0.378926
58455422	0.604888	0.528942	0.37716	0.305782	0.230585	0.0436201	0.0874888	0.0234842	0.378926
11311503	0.604888	0.528942	0.37716	0.305782	0.230585	0.0436201	0.0874888	0.0234842	0.378926
118703665	0.604888	0.528942	0.37716	0.305782	0.230585	0.0436201	0.0874888	0.0234842	0.378926
146014346	0.604888	0.528942	0.37716	#N/A	0.230585	0.0436201	0.0874888	0.0234842	0.378926
122220071	0.604964	0.178727	0.346416	0.0443324	0.24963	0.0553369	0.119812	0.0343581	0.450763
129437559	0.604978	0.530134	0.439632	0.105779	0.225213	0.242389	0.303599	0.505584	0.554506
22880800	0.605044	0.571377	0.410392	0.294292	0.254687	0.229444	0.322289	0.837815	0.707911
478563	0.605053	0.783856	0.416232	0.0250413	0.199852	0.0560545	0.278541	0.520778	0.671094
470030	0.605126	0.818263	0.410499	0.399526	0.370927	0.231982	0.655004	0.75418	0.822946
483941	0.605221	0.946994	0.402485	#N/A	0.279658	0.0448811	0.132209	0.47067	0.501085
5287841	0.605318	0.355671	0.404346	0.087191	0.209569	0.278398	0.174931	0.035644	0.459141
21787858	0.605349	0.598008	0.413477	0.0569274	0.211284	0.0261871	0.572863	0.295943	0.642007
3005951	0.605395	0.316966	0.323048	0.168688	0.237216	0.219459	0.133	0.0273684	0.466647
482632	0.605528	0.44874	0.412786	0.210904	0.2835	0.776362	0.60747	0.796467	0.824783
466400	0.605591	0.231467	0.367325	0.0141445	0.160047	0.969875	0.670377	0.442546	0.690329
3010388	0.605657	0.848442	0.414226	0.438884	0.352566	0.583575	0.693893	0.917426	0.831735
46875339	0.605657	0.848442	0.414226	0.438884	0.352566	0.583575	0.693893	0.917426	0.831735
92246571	0.605657	0.848442	0.414226	0.438884	0.352566	0.583575	0.693893	0.917426	0.831735
134229912	0.605898	0.346586	0.404097	0.349141	0.224905	0.332763	0.623532	0.853939	0.780451
135848702	0.606046	0.330474	0.326369	0.0458965	0.174529	0.0116213	0.150652	0.273171	0.559886
123993511	0.606085	0.390236	0.5287	0.0959847	0.21597	0.0130733	0.044387	0.0190818	0.421877
512136	0.606282	0.838449	0.441609	0.195256	0.233213	0.127245	0.58317	0.704801	0.831967
447192	0.606305	0.337644	0.408559	0.0722094	0.183959	0.0609654	0.182868	0.055269	0.4626
98575509	0.606827	0.315459	0.35746	0.0829269	0.218736	0.0164334	0.068959	0.0195215	0.496876
40493564	0.606827	0.315459	0.35746	0.0829269	0.218736	0.0164334	0.068959	0.0195215	0.496876
453168	0.606843	0.739288	0.315731	0.0853794	0.198663	0.550574	0.182935	0.394038	0.602067
139267848	0.606918	0.222935	0.372238	0.140467	0.23201	0.0288829	0.053304	0.0241054	0.535571
139591931	0.606918	0.222752	0.37213	0.144497	0.234	0.0299195	0.0526606	0.0240135	0.535537
139267847	0.606918	0.222935	0.372238	0.140467	0.23201	0.0288829	0.053304	0.0241054	0.535571
139267828	0.606918	0.222752	0.37213	0.144497	0.234	0.0299195	0.0526606	0.0240135	0.535537
135692739	0.607061	0.802109	0.422273	0.149916	0.193257	0.0607835	0.295642	0.1646	0.667949
14162717	0.607336	0.408347	0.352615	0.122821	0.195337	0.0169793	0.224647	0.6987	0.802862
147839	0.607336	0.408347	0.352615	0.122821	0.195337	0.0169793	0.224647	0.6987	0.802862
3032355	0.607391	0.7406	0.366777	0.30412	0.23168	0.426187	0.220332	0.516008	0.535308
3000603	0.607391	0.7406	0.366777	0.30412	0.23168	0.426187	0.220332	0.516008	0.535308
10334791	0.607469	0.617057	0.384365	0.240265	0.188418	0.0439253	0.339941	0.660914	0.513502
71732376	0.607817	0.265113	0.378505	0.0193839	0.212873	0.0390544	0.216822	0.0464606	0.46772
135410340	0.608033	0.823527	0.336483	0.0357562	0.205296	0.121151	0.141569	0.345212	0.642574
135740163	0.608033	0.823527	0.336483	0.0357562	0.205296	0.121151	0.141569	0.345212	0.642574
135453973	0.608033	0.823527	0.336483	#N/A	0.205296	0.121151	0.141569	0.345212	0.642574
150621	0.608076	0.593841	0.36558	0.189464	0.223018	0.0300651	0.0785016	0.0576963	0.406054
3037046	0.608319	0.637103	0.398581	0.0954426	0.264243	0.349284	0.256891	0.473409	0.598323
3002879	0.60839	0.575354	0.370686	0.339985	0.228776	0.486859	0.64058	0.409022	0.792183
67228673	0.608412	0.124954	0.406165	0.0403922	0.188386	0.0540862	0.462276	0.594977	0.657655
22723869	0.608412	0.124954	0.406165	0.0403922	0.188386	0.0540862	0.462276	0.594977	0.657655
171555	0.60849	0.381784	0.402145	0.0863885	0.230661	0.229403	0.394151	0.62575	0.784772
54531450	0.608525	0.454482	0.312294	0.202638	0.264811	0.0451746	0.116269	0.0351208	0.346887
23112639	0.608525	0.454482	0.312294	0.202638	0.264811	0.0451746	0.116269	0.0351208	0.346887
53678903	0.608677	0.398272	0.404649	0.203201	0.187561	0.364794	0.379334	0.632565	0.708206
513206	0.608944	0.12084	0.376913	0.00998603	0.154414	0.946781	0.560025	0.514435	0.637075
137221145	0.609097	0.660634	0.432754	0.118546	0.236203	0.0369312	0.120612	0.0483614	0.733185
136842926	0.609097	0.660634	0.432754	0.118546	0.236203	0.0369312	0.120612	0.0483614	0.733185
144823459	0.609234	0.289238	0.410888	0.0938719	0.209511	0.00529116	0.0621739	0.0288073	0.424391
10778362	0.609286	0.425889	0.405821	0.141003	0.296749	0.0765962	0.0782021	0.054244	0.426337
11196409	0.609302	0.401495	0.400013	0.02585	0.206696	0.0815666	0.483999	0.237373	0.661649
92236585	0.609438	0.401871	0.383608	0.0731478	0.231966	0.191837	0.278677	0.59153	0.64075
261450	0.609438	0.401871	0.383608	0.0731478	0.231966	0.191837	0.278677	0.59153	0.64075
92236583	0.609438	0.401871	0.383608	0.0731478	0.231966	0.191837	0.278677	0.59153	0.64075
459890	0.609438	0.401871	0.383608	0.0731478	0.231966	0.191837	0.278677	0.59153	0.64075
152488	0.610042	0.781293	0.393351	0.393219	0.292063	0.609521	0.400728	0.582195	0.764
324745	0.610325	0.231819	0.429621	#N/A	0.23764	0.021765	0.0392579	0.0593113	0.442703
7204908	0.610589	0.356869	0.37722	0.068885	0.238826	0.122236	0.477713	0.415059	0.627439
44629931	0.610589	0.356869	0.37722	0.068885	0.238826	0.122236	0.477713	0.415059	0.627439
3010385	0.610653	0.419862	0.414917	0.303172	0.244469	0.121934	0.374553	0.869428	0.734293
3007126	0.610657	0.377785	0.320912	0.21051	0.200041	0.0133668	0.0719042	0.0192656	0.656582
25231310	0.610721	0.225862	0.349792	0.0248835	0.180471	0.100689	0.27587	0.666131	0.709607
10753744	0.610782	0.753422	0.447622	0.131185	0.200365	0.0199503	0.088495	0.0160217	0.626207
131882742	0.611187	0.708301	0.40361	0.0465317	0.38859	0.296188	0.446713	0.746164	0.770769
495012	0.611196	0.293776	0.375851	0.0479537	0.328832	0.213714	0.267988	0.521334	0.774341
11004885	0.611239	0.253278	0.396199	0.0411385	0.326922	0.0440083	0.280729	0.833739	0.644579
15742006	0.611264	0.33368	0.368121	0.0434164	0.230079	0.0315995	0.448932	0.908038	0.671689
369086	0.611305	0.68313	0.359906	0.115113	0.201729	0.0322202	0.125533	0.0248611	0.667602
131072	0.611305	0.68313	0.359906	0.115113	0.201729	0.0322202	0.125533	0.0248611	0.667602
10469019	0.611327	0.586105	0.363908	0.2975	0.202936	0.161023	0.259737	0.603761	0.60066
66906535	0.611433	0.105768	0.397065	0.358746	0.243664	0.0963555	0.58415	0.645087	0.83392
845540	0.611508	0.642415	0.398616	#N/A	0.231777	0.118411	0.539637	0.607039	0.833593
11697484	0.611639	0.381758	0.417506	0.268602	0.292107	0.332069	0.43321	0.75429	0.598771
10400520	0.611892	0.242524	0.382812	0.143502	0.21231	0.0507232	0.562368	0.409942	0.800707
21854430	0.612155	0.427898	0.447652	0.0737148	0.250151	0.309412	0.659161	0.650524	0.86625
506145	0.61218	0.802842	0.460566	0.175801	0.331492	0.326262	0.732445	0.450183	0.551511
12799571	0.612192	0.870431	0.424701	0.0784784	0.285307	0.360171	0.210514	0.190599	0.779771
98801	0.612197	0.571709	0.399903	0.327015	0.280357	0.496805	0.719343	0.832838	0.839298
92230795	0.612262	0.775055	0.41704	0.186257	0.30736	0.101674	0.671736	0.683195	0.83857
18661221	0.612262	0.775055	0.41704	0.186257	0.30736	0.101674	0.671736	0.683195	0.83857
69454489	0.612267	0.288256	0.380294	0.169993	0.24645	0.12807	0.458903	0.45591	0.575989
71744251	0.612267	0.288256	0.380294	0.169993	0.24645	0.12807	0.458903	0.45591	0.575989
11390847	0.612493	0.473579	0.366241	0.241374	0.194324	0.298334	0.0896524	0.0210471	0.486878
10264872	0.612516	0.395902	0.394925	0.0575863	0.202891	0.0615523	0.598259	0.317483	0.833827
53243689	0.612643	0.346463	0.44937	0.0264511	0.192431	0.175465	0.307167	0.764296	0.464147
126968805	0.612759	0.256044	0.378226	0.0966602	0.236208	0.0423874	0.0688902	0.029467	0.594206
139024751	0.612759	0.256044	0.378226	0.0966602	0.236208	0.0423874	0.0688902	0.029467	0.594206
251784	0.612759	0.256044	0.378226	#N/A	0.236208	0.0423874	0.0688902	0.029467	0.594206
25728863	0.612759	0.256044	0.378226	0.0966602	0.236208	0.0423874	0.0688902	0.029467	0.594206
7272023	0.612759	0.256044	0.378226	0.0966602	0.236208	0.0423874	0.0688902	0.029467	0.594206
11276944	0.612759	0.256044	0.378226	0.0966602	0.236208	0.0423874	0.0688902	0.029467	0.594206
118026092	0.612774	0.427365	0.393915	0.18095	0.272286	0.0396669	0.0825024	0.0534115	0.415462
86306492	0.612802	0.300332	0.402049	0.139845	0.301106	0.0769116	0.117559	0.0257055	0.458274
124428635	0.613031	0.259669	0.361787	0.276583	0.219605	0.608658	0.182249	0.0896889	0.570514
92918	0.613031	0.259669	0.361787	0.276583	0.219605	0.608658	0.182249	0.0896889	0.570514
97000	0.613031	0.259669	0.361787	0.276583	0.219605	0.608658	0.182249	0.0896889	0.570514
7282382	0.613031	0.259669	0.361787	0.276583	0.219605	0.608658	0.182249	0.0896889	0.570514
14135553	0.613031	0.259669	0.361787	0.276583	0.219605	0.608658	0.182249	0.0896889	0.570514
490445	0.613169	0.274719	0.372665	0.0260118	0.219849	0.430449	0.749393	0.433026	0.821084
102461643	0.613271	0.475158	0.399904	0.0777765	0.228505	0.0360849	0.0758397	0.0558996	0.437405
118294346	0.613329	0.662409	0.420235	0.269245	0.272633	0.366915	0.185151	0.181272	0.632963
500026	0.613489	0.641545	0.39021	0.107934	0.258613	0.0849887	0.464467	0.40205	0.704446
101947567	0.613525	0.435628	0.441712	0.197571	0.303345	0.609559	0.491637	0.778667	0.607064
21677361	0.614121	0.804801	0.442558	0.342921	0.275053	0.00922717	0.293407	0.600606	0.658546
452095	0.614156	0.28518	0.361651	0.14767	0.169374	0.154659	0.297656	0.743797	0.409984
14430353	0.614156	0.28518	0.361651	0.14767	0.169374	0.154659	0.297656	0.743797	0.409984
22875362	0.614172	0.111217	0.395848	0.271705	0.257637	0.0236338	0.100753	0.0738716	0.545837
21852786	0.614366	0.567466	0.428353	0.0423789	0.220463	0.159424	0.0792108	0.045655	0.438376
11507479	0.61453	0.679394	0.390425	0.150064	0.249362	0.222008	0.319985	0.244309	0.688836
3034423	0.61453	0.679394	0.390425	0.150064	0.249362	0.222008	0.319985	0.244309	0.688836
6595185	0.61453	0.679394	0.390425	0.150064	0.249362	0.222008	0.319985	0.244309	0.688836
676166	0.61453	0.679394	0.390425	0.150064	0.249362	0.222008	0.319985	0.244309	0.688836
512674	0.614611	0.77144	0.381533	0.146189	0.21051	0.0133354	0.0596802	0.0576023	0.422817
135509485	0.614719	0.729649	0.381059	0.164261	0.228072	0.0856026	0.195349	0.558132	0.595446
135511868	0.614719	0.729649	0.381059	0.164261	0.228072	0.0856026	0.195349	0.558132	0.595446
136257804	0.614719	0.729649	0.381059	0.164261	0.228072	0.0856026	0.195349	0.558132	0.595446
136843263	0.614719	0.729649	0.381059	0.164261	0.228072	0.0856026	0.195349	0.558132	0.595446
137090331	0.614719	0.729649	0.381059	0.164261	0.228072	0.0856026	0.195349	0.558132	0.595446
54256130	0.614912	0.210313	0.403576	0.0494353	0.262724	0.169989	0.318675	0.623687	0.712742
513870	0.615264	0.20545	0.39371	0.0944436	0.24954	0.0567487	0.399926	0.550729	0.627756
6708818	0.615462	0.330559	#N/A	0.0911326	#N/A	0.021391	0.113054	0.057583	0.328555
688121	0.615462	0.330559	0.36906	0.0911326	0.219281	0.021391	0.113054	0.057583	0.328555
490037	0.615462	0.330559	0.36906	0.0911326	0.219281	0.021391	0.113054	0.057583	0.328555
6256	0.615462	0.330559	0.36906	0.0911326	#N/A	0.021391	0.113054	0.057583	0.328555
150628	0.615558	0.163344	0.356588	0.0859128	0.255655	0.010993	0.0777143	0.0455903	0.359997
92231363	0.61598	0.657292	0.430124	0.16214	0.314856	0.210924	0.617626	0.680495	0.684585
29921448	0.61598	0.657292	0.430124	0.16214	0.314856	0.210924	0.617626	0.680495	0.684585
15612863	0.616119	0.416357	0.437273	0.0561906	0.135055	0.329605	0.472389	0.105112	0.515753
136896502	0.616465	0.719097	0.411926	0.148791	0.185701	0.0285382	0.210366	0.198259	0.694156
135453913	0.616465	0.719097	0.411926	0.148791	0.185701	0.0285382	0.210366	0.198259	0.694156
10107866	0.616502	0.346723	0.328627	0.161115	0.234537	0.331515	0.220763	0.583457	0.57117
21817403	0.616538	0.414922	0.452399	0.0318463	0.125944	0.0794393	0.290962	0.0439937	0.469581
92252780	0.616751	0.455314	0.390937	0.0862095	0.243597	0.0652781	0.287596	0.350627	0.817607
97692	0.616751	0.455314	0.390937	0.0862095	0.243597	0.0652781	0.287596	0.350627	0.817607
67113473	0.616985	0.306382	0.376303	0.362692	0.234372	0.159845	0.129087	0.055	0.585493
21121840	0.617069	0.291616	0.358889	0.267158	0.214103	0.0279126	0.0945605	0.101902	0.487561
134004	0.617069	0.291616	0.358889	0.267158	0.214103	0.0279126	0.0945605	0.101902	0.487561
54339089	0.617154	0.290657	0.362608	0.0603733	0.249923	0.253425	0.441211	0.515817	0.513099
355902	0.617259	0.938971	0.458163	0.261987	0.316353	0.172478	0.2947	0.848506	0.593412
453997	0.617259	0.938971	0.458163	0.261987	0.316353	0.172478	0.2947	0.848506	0.593412
9900206	0.617523	0.853051	0.412705	0.362507	0.245648	0.25514	0.161967	0.11743	0.436311
268421	0.618048	0.476297	0.377714	0.269466	0.188972	0.0465917	0.132226	0.0422018	0.4086
92245911	0.618048	0.476297	0.377714	0.269466	0.188972	0.0465917	0.132226	0.0422018	0.4086
97304120	0.618163	0.335222	0.430199	0.0816559	0.20137	0.00445911	0.0865067	0.0449557	0.435916
136674916	0.618339	0.67101	0.382281	0.177407	0.179513	0.0130498	0.168914	0.491441	0.582165
117940991	0.618355	0.589088	0.401847	0.129358	0.247489	0.0520423	0.102331	0.0398969	0.439421
131881293	0.618478	0.861977	0.427927	0.258732	0.293645	0.467828	0.746022	0.870638	0.83957
110158190	0.618558	0.0699827	0.341728	0.0414857	0.232766	0.143696	0.802195	0.490317	0.825521
135600345	0.618814	0.809459	0.419106	0.187171	0.404435	0.167261	0.206999	0.259194	0.547304
21125843	0.618853	0.493008	0.384662	0.280796	0.279519	0.0710774	0.127257	0.207349	0.583161
10491412	0.619065	0.742439	0.448008	0.173708	0.210564	0.060851	0.0959125	0.0249735	0.645197
137699364	0.619199	0.0838284	0.321872	0.0400387	0.266854	0.284879	0.110415	0.0105845	0.432317
5272754	0.619561	0.745736	0.422181	0.0426852	0.255781	0.230389	0.430425	0.357358	0.813548
15289165	0.619571	0.865	0.403413	0.477602	0.302173	0.447587	0.647983	0.87984	0.746578
10107217	0.61965	0.354538	0.37652	0.315952	0.225938	0.221262	0.0921235	0.0828975	0.581155
11825687	0.619706	0.601898	0.449764	0.178535	0.307723	0.396601	0.583262	0.789543	0.703136
135410347	0.619711	0.859053	0.407545	0.210702	0.24289	0.255505	0.342675	0.454773	0.633011
135398550	0.619815	0.707939	0.388691	0.0909538	0.209532	0.0357001	0.172491	0.51426	0.569515
131885345	0.620264	0.336484	0.445595	0.155275	0.296482	0.625895	0.756497	0.730954	0.812321
121487449	0.621253	0.412253	0.427608	0.089443	0.204033	0.100759	0.0601353	0.0359625	0.609823
22880824	0.621511	0.616496	0.417037	0.184192	0.249918	0.115724	0.617917	0.511729	0.654138
11358266	0.621717	0.21623	0.438347	0.241417	0.255273	0.354769	0.725108	0.809322	0.642895
135463451	0.621737	0.55612	0.396638	0.111991	0.175374	0.023395	0.109828	0.497404	0.689355
131884920	0.621828	0.629283	0.440031	0.304867	0.424894	0.596324	0.754779	0.912238	0.668949
124345	0.621841	0.538279	0.368897	0.171728	0.191337	0.0347496	0.0592068	0.0217829	0.643134
92286287	0.621841	0.538279	0.368897	0.171728	0.191337	0.0347496	0.0592068	0.0217829	0.643134
121486830	0.621959	0.110613	0.423153	0.149205	0.303248	0.615845	0.700844	0.901423	0.69509
188276	0.622146	0.499289	0.381355	0.159487	0.325163	0.210483	0.0590946	0.0489646	0.452942
21769737	0.622202	0.346322	0.400075	0.118347	0.229093	0.0652654	0.402605	0.369081	0.845765
98625	0.622209	0.609373	0.412557	0.0391187	0.215251	0.155715	0.509173	0.743052	0.819537
44366461	0.622391	0.682635	0.35912	0.134248	0.207272	0.400566	0.120731	0.227663	0.413515
515085	0.622525	0.606216	0.402244	0.175436	0.195409	0.119051	0.122473	0.0317322	0.464095
155905558	0.622637	0.42106	0.383268	0.101255	0.202019	0.00431635	0.0907213	0.0468404	0.540425
134520771	0.622873	0.368183	0.324079	0.0856593	0.330223	0.160429	0.131221	0.0314193	0.44914
131850900	0.623305	0.826317	0.400872	0.120117	0.260172	0.326663	0.477553	0.327037	0.677648
155905580	0.623362	0.544441	0.407281	0.195611	0.200123	0.0222621	0.0793081	0.126082	0.581408
188350	0.623371	0.155258	0.347035	0.0433901	0.168486	0.065185	0.297752	0.752213	0.746625
3012549	0.623787	0.940564	0.314669	0.219308	0.252625	0.204074	0.239551	0.0831492	0.560252
2999329	0.623811	0.568346	0.386546	0.115751	#N/A	0.0406236	0.678076	0.621832	0.757678
71435310	0.623834	0.337206	0.358971	0.123546	0.165863	0.0708024	0.365063	0.73952	0.731839
54297338	0.623917	0.670276	0.401133	0.057486	0.19981	0.077384	0.485095	0.211967	0.682129
125734	0.623917	0.670276	0.401133	0.057486	0.19981	0.077384	0.485095	0.211967	0.682129
121487030	0.624051	0.162271	0.405421	0.192185	0.189007	0.252998	0.0884886	0.141276	0.505868
133609839	0.624286	0.209089	0.423136	0.0602195	0.273484	0.256607	0.134917	0.109519	0.536006
502242	0.624323	0.10028	0.313901	0.0592894	0.192677	0.0277561	0.381964	0.0625239	0.338412
13989304	0.624453	0.782917	0.443529	0.305198	0.3434	0.0123804	0.21385	0.100246	0.480852
131852043	0.624459	0.197245	0.330663	0.0958009	0.237196	0.120631	0.110736	0.0639215	0.635946
6481236	0.62453	0.571295	0.37082	0.388337	0.206567	0.192119	0.10276	0.0844049	0.494264
57453628	0.62453	0.571295	0.37082	0.388337	0.206567	0.192119	0.10276	0.0844049	0.494264
124223848	0.62453	0.571295	0.37082	0.388337	0.206567	0.192119	0.10276	0.0844049	0.494264
44451208	0.624679	0.339754	0.39358	0.0490068	0.192244	0.0568089	0.219373	0.6765	0.634293
92229576	0.624679	0.339754	0.39358	0.0490068	0.192244	0.0568089	0.219373	0.6765	0.634293
136030678	0.624823	0.596658	0.41357	0.302024	0.290399	0.489551	0.121656	0.94773	0.677117
150669	0.624866	0.61184	0.416336	0.0824715	0.258196	0.0483489	0.477828	0.231737	0.852974
29921449	0.624972	0.81193	0.407355	0.391985	0.306401	0.226387	0.565733	0.715933	0.55259
512869	0.625023	0.103203	0.414082	0.122353	0.219578	0.0268802	0.0610697	0.0524271	0.373065
92264349	0.625023	0.103203	0.414082	0.122353	0.219578	0.0268802	0.0610697	0.0524271	0.373065
131858703	0.625285	0.902143	0.456822	0.299469	0.316464	0.591476	0.335989	0.944165	0.796079
5271015	0.625322	0.2767	0.385538	0.170367	0.195242	0.0368705	0.776114	0.4012	0.842947
131881064	0.625392	0.318006	0.391128	0.237204	0.202021	0.673814	0.689653	0.756544	0.840613
92247204	0.625392	0.318006	0.391128	0.237204	0.202021	0.673814	0.689653	0.756544	0.840613
125503985	0.625403	0.467395	0.388335	0.0551512	0.211863	0.0824591	0.431854	0.246915	0.837366
512130	0.625489	0.966687	0.400723	0.0369473	0.312724	0.0289278	0.35679	0.230114	0.732492
102601363	0.625597	0.540607	0.398711	0.0448693	0.229369	0.0128531	0.027647	0.0178116	0.308115
121216248	0.625634	0.361641	0.413777	0.235584	0.222339	0.0428966	0.0934732	0.0377648	0.497294
121698	0.62568	0.371928	0.394139	0.430366	0.228155	0.048536	0.106494	0.0299505	0.517073
13052734	0.62568	0.371928	0.394139	0.430366	0.228155	0.048536	0.106494	0.0299505	0.517073
512707	0.626029	0.714147	0.389593	0.132498	0.195342	0.0297382	0.395248	0.227901	0.799608
489849	0.626151	0.0639756	0.32388	0.0134276	0.250549	0.0906416	0.371263	0.845631	0.769078
10063737	0.626724	0.129121	0.400329	0.0396264	0.226224	0.0305202	0.352318	0.59394	0.629642
65102	0.626813	0.348502	0.374476	0.0758302	0.232624	0.246577	0.57023	0.28787	0.764819
58834006	0.626813	0.348502	0.374476	0.0758302	0.232624	0.246577	0.57023	0.28787	0.764819
21820463	0.626813	0.348502	0.374476	0.0758302	0.232624	0.246577	0.57023	0.28787	0.764819
12800105	0.626813	0.348502	0.374476	0.0758302	0.232624	0.246577	0.57023	0.28787	0.764819
135435173	0.626835	0.736093	0.379672	0.22	0.210123	0.270911	0.125851	0.318381	0.552294
211875	0.626852	0.326923	0.37704	0.306174	0.232774	0.16845	0.180563	0.117822	0.585864
136195916	0.627129	0.757134	0.401016	0.2512	0.258893	0.519315	0.13563	0.759802	0.630078
121486862	0.627257	0.688851	0.404494	0.287749	0.246817	0.410101	0.468909	0.309233	0.769558
135422917	0.627539	0.891415	0.39025	0.259045	0.242106	0.17639	0.128532	0.931783	0.529241
15953881	0.627744	0.0981363	0.36874	0.0640108	0.223179	0.57843	0.690273	0.382468	0.7776
451915	0.627744	0.0981363	0.36874	0.0640108	0.223179	0.57843	0.690273	0.382468	0.7776
135616711	0.627921	0.530129	0.413901	0.249256	0.19807	0.0958712	0.0849866	0.0881051	0.649963
101784714	0.627948	0.346009	0.393985	0.118867	0.21433	0.157328	0.294264	0.505504	0.568605
10782439	0.627972	0.234585	0.392245	0.0474517	0.203756	0.0715567	0.274602	0.666019	0.67021
13993514	0.627979	0.24818	0.329497	0.0313105	0.209553	0.571035	0.568302	0.452245	0.668665
10198304	0.627979	0.24818	0.329497	0.0313105	0.209553	0.571035	0.568302	0.452245	0.668665
135538642	0.628053	0.465678	0.351594	0.15317	0.171732	0.209497	0.151433	0.395027	0.495129
136076706	0.628053	0.77581	0.365501	0.197871	0.188044	0.111954	0.101279	0.404397	0.581364
135532713	0.628053	0.465678	0.351594	0.15317	0.171732	0.209497	0.151433	0.395027	0.495129
135538671	0.628053	0.465678	0.351594	0.15317	0.171732	0.209497	0.151433	0.395027	0.495129
135434940	0.628053	0.77581	0.365501	0.197871	0.188044	0.111954	0.101279	0.404397	0.581364
135800807	0.628053	0.465678	0.351594	0.15317	0.171732	0.209497	0.151433	0.395027	0.495129
136854232	0.628053	0.77581	0.365501	0.197871	0.188044	0.111954	0.101279	0.404397	0.581364
135433837	0.628053	0.77581	0.365501	0.197871	0.188044	0.111954	0.101279	0.404397	0.581364
137274215	0.628053	0.77581	0.365501	0.197871	0.188044	0.111954	0.101279	0.404397	0.581364
136236459	0.628225	0.835842	0.385818	0.142062	0.250068	0.433007	0.100666	0.404095	0.57176
73651	0.62832	0.0380932	0.31798	0.0284811	0.206264	0.36018	0.755002	0.424227	0.777225
44308741	0.62832	0.0380932	0.31798	0.0284811	0.206264	0.36018	0.755002	0.424227	0.777225
490435	0.62832	0.0380932	0.31798	0.0284811	0.206264	0.36018	0.755002	0.424227	0.777225
137128749	0.628376	0.229875	0.380438	0.0545112	0.257362	0.0568305	0.15434	0.655054	0.621223
10611197	0.628552	0.484939	0.376693	0.178532	0.204207	0.0753234	0.0946565	0.0686699	0.455355
14843513	0.62861	0.565488	0.417001	0.158565	0.193431	0.20843	0.189225	0.774507	0.574718
455179	0.628625	0.905294	0.345687	0.0884077	0.228467	0.475142	0.224482	0.487319	0.655867
454528	0.628625	0.905294	0.345687	0.0884077	0.228467	#N/A	0.224482	0.487319	0.655867
454530	0.628625	0.905294	0.345687	0.0884077	0.228467	#N/A	0.224482	0.487319	0.655867
373953	0.628681	0.277465	0.347908	0.1245	0.180414	0.235251	0.638402	0.452204	0.755119
121228750	0.628902	0.570197	0.392747	0.278674	0.287253	0.152879	0.227327	0.796892	0.668599
102381563	0.628984	0.256288	0.40301	0.397766	0.20861	0.0215731	0.615863	0.544132	0.790577
22885207	0.629092	0.522551	0.386826	0.161644	0.219715	0.171425	0.275372	0.886632	0.80329
10611929	0.62922	0.426481	0.413101	0.0770335	0.22065	0.056644	0.620901	0.26533	0.838666
12358319	0.629241	0.422567	0.412794	0.0770335	0.2239	0.0600363	0.628077	0.252901	0.836225
512657	0.629299	0.449063	0.388607	0.0722454	0.262578	0.185748	0.244177	0.530171	0.823483
71313037	0.6293	0.450834	0.457515	0.0770335	0.221327	0.056644	0.586277	0.280853	0.836239
71776184	0.6293	0.450834	0.457515	0.0770335	0.221327	0.056644	0.586277	0.280853	0.836239
121486927	0.629773	0.168532	0.417429	0.272062	0.314444	0.699014	0.654908	0.846455	0.69337
11032861	0.629774	0.423666	0.406047	0.0770335	0.223253	0.056644	0.619642	0.261851	0.839821
13566115	0.629787	0.806685	0.447801	0.291334	0.365006	0.0083119	0.261188	0.230116	0.497518
22880803	0.629833	0.791675	0.408567	0.386324	0.254301	0.21792	0.445164	0.599711	0.636988
73345328	0.629955	0.651563	0.405715	0.0908357	0.13967	0.435167	0.316165	0.356397	0.713479
44146603	0.62997	0.482407	0.40593	0.217548	0.214913	0.0434962	0.0685676	0.066987	0.524414
70385614	0.630327	0.213469	0.360212	0.208429	0.232435	0.0252562	0.666729	0.235547	0.710664
267808	0.630699	0.501682	0.330744	0.0999546	0.199451	0.0478587	0.199924	0.0647029	0.659151
14682078	0.630699	0.501682	0.330744	0.0999546	0.199451	0.0478587	0.199924	0.0647029	0.659151
66649608	0.630834	0.545871	0.391909	0.195731	0.221053	0.0815498	0.115757	0.0564411	0.558185
21769748	0.630887	0.366561	0.385304	0.251503	0.268881	0.130797	0.53978	0.480827	0.848622
23629091	0.63093	0.576612	0.414019	0.373383	0.323342	0.567459	0.525683	0.691434	0.638902
13872084	0.631086	0.573836	0.413707	0.165112	0.214693	0.400109	0.501942	0.473472	0.613479
92237723	0.631113	0.474107	0.363014	0.0670145	0.218888	0.0999204	0.145522	0.283637	0.657367
21627890	0.631113	0.474107	0.363014	0.0670145	0.218888	0.0999204	0.145522	0.283637	0.657367
471486	0.631124	0.617792	0.374964	0.212703	0.222864	0.354681	0.0839295	0.0348972	0.532786
511669	0.63114	0.354301	0.353427	0.0800102	0.229584	0.0128492	0.126047	0.0945644	0.379979
121487049	0.63114	0.354301	0.353427	0.0800102	0.229584	0.0128492	0.126047	0.0945644	0.379979
490630	0.631262	0.771862	0.392134	0.113936	0.28257	0.348061	0.40686	0.547322	0.703845
58761796	0.631276	0.121872	0.321456	0.080724	0.247153	0.116564	0.327122	0.5615	0.48317
122707085	0.631601	0.242054	0.353497	0.0263985	0.177208	0.0148406	0.232222	0.700647	0.517324
297594	0.631601	0.242054	0.353497	0.0263985	0.177208	0.0148406	0.232222	0.700647	0.517324
451856	0.631616	0.264302	0.352945	0.0790935	0.205473	0.107786	0.114223	0.0619967	0.397009
14430362	0.631633	0.711791	0.432688	0.0342889	0.237485	0.17925	0.260834	0.618576	0.489216
452096	0.631633	0.711791	0.432688	0.0342889	0.237485	0.17925	0.260834	0.618576	0.489216
11065406	0.631648	0.33145	0.386852	0.0854439	0.206051	0.0897734	0.510177	0.353019	0.640349
92233963	0.631648	0.33145	0.386852	0.0854439	0.206051	0.0897734	0.510177	0.353019	0.640349
12137955	0.631648	0.33145	0.386852	0.0854439	0.206051	0.0897734	0.510177	0.353019	0.640349
3007920	0.631746	0.54792	0.374645	0.276663	0.188985	0.159768	0.429977	0.558607	0.714963
124715	0.631746	0.54792	0.374645	0.276663	0.188985	0.159768	0.429977	0.558607	0.714963
3006222	0.631746	0.54792	0.374645	0.276663	0.188985	0.159768	0.429977	0.558607	0.714963
121217034	0.631767	0.441179	0.382109	0.13582	0.28868	0.0544338	0.161033	0.0453917	0.525313
121487456	0.631844	0.0588466	0.324559	0.0631098	0.210607	0.00182617	0.083622	0.0442881	0.246102
15934097	0.631978	0.402247	0.416228	0.0878394	0.163171	0.313907	0.419077	0.0603082	0.514284
21829540	0.632041	0.69889	0.378201	0.0786214	0.247514	0.353785	0.242684	0.252758	0.569264
135443731	0.632047	0.743853	0.352966	0.18443	0.198301	0.160231	0.150617	0.422421	0.39283
131884619	0.63217	0.129974	0.412179	0.0506139	0.237768	0.0365925	0.332725	0.67151	0.825506
125494152	0.632215	0.717294	0.452344	0.0713081	0.219185	0.0693593	0.0537536	0.0322012	0.514302
125494151	0.632215	0.717294	0.452344	0.0713081	0.219185	0.0693593	0.0537536	0.0322012	0.514302
135483941	0.632252	0.883533	0.381945	0.27786	0.2117	0.0846843	0.0957767	0.53055	0.446332
135483976	0.632252	0.883533	0.381945	0.27786	0.2117	0.0846843	0.0957767	0.53055	0.446332
139086336	0.632507	0.809555	0.397766	0.50137	0.289191	0.5676	0.539462	0.86479	0.817738
94725030	0.632767	0.333751	0.392858	0.163074	0.225064	0.0764617	0.610541	0.241608	0.809177
92131953	0.632767	0.356053	0.379092	0.047342	0.229758	0.0579515	0.616645	0.167562	0.809656
9816781	0.632767	0.356053	0.379092	0.047342	0.229758	0.0579515	0.616645	0.167562	0.809656
92233339	0.632767	0.356053	0.379092	0.047342	0.229758	0.0579515	0.616645	0.167562	0.809656
266234	0.632767	0.356053	0.379092	0.047342	0.229758	0.0579515	0.616645	0.167562	0.809656
12800104	0.632767	0.333751	0.392858	0.163074	0.225064	0.0764617	0.610541	0.241608	0.809177
58834035	0.632767	0.333751	0.392858	0.163074	0.225064	0.0764617	0.610541	0.241608	0.809177
57061669	0.632767	0.356053	0.379092	0.047342	0.229758	0.0579515	0.616645	0.167562	0.809656
94725032	0.632767	0.333751	0.392858	0.163074	0.225064	0.0764617	0.610541	0.241608	0.809177
447594	0.632767	0.333751	0.392858	0.163074	0.225064	0.0764617	0.610541	0.241608	0.809177
11032790	0.632767	0.356053	0.379092	0.047342	0.229758	0.0579515	0.616645	0.167562	0.809656
84392	0.632767	0.356053	0.379092	0.047342	0.229758	0.0579515	0.616645	0.167562	0.809656
3035929	0.632767	0.333751	0.392858	0.163074	0.225064	0.0764617	0.610541	0.241608	0.809177
14191021	0.632913	0.203363	0.394399	0.0339734	0.202301	0.0196139	0.481986	0.726848	0.661212
135771852	0.633176	0.828308	0.385075	0.151415	0.267625	0.0788878	0.139169	0.441877	0.655294
101339887	0.6332	0.2745	0.357909	#N/A	0.224487	0.474903	0.0904856	0.114402	0.432839
102531168	0.6332	0.2745	0.357909	0.218915	0.224487	0.474903	0.0904856	0.114402	0.432839
59504008	0.633282	0.152989	0.423048	0.136945	0.215083	0.014341	0.0838233	0.043159	0.41054
59504149	0.633282	0.152989	0.423048	0.136945	0.215083	0.014341	0.0838233	0.043159	0.41054
59504120	0.633282	0.152989	0.423048	0.136945	0.215083	0.014341	0.0838233	0.043159	0.41054
21854120	0.63329	0.550805	0.349979	0.100862	0.213632	0.0626365	0.0635926	0.0636585	0.691651
71337875	0.633439	0.448545	0.339567	0.242832	0.196325	0.0789118	0.475844	0.585047	0.713553
71352385	0.633439	0.448545	0.339567	0.242832	0.196325	0.0789118	0.475844	0.585047	0.713553
59252566	0.633798	0.225324	0.326681	0.046861	0.183928	0.0896188	0.280663	0.805485	0.27836
131700647	0.633804	0.125334	0.418939	0.148065	0.19769	0.35942	0.411975	0.298835	0.566068
639614	0.633804	0.125334	0.418939	0.148065	0.19769	0.35942	0.411975	0.298835	0.566068
13941609	0.633819	0.883556	0.37813	0.0495125	0.151942	0.0328193	0.0226427	0.0153167	0.258838
128656	0.633823	0.596077	0.367175	0.0762558	0.296608	0.375228	0.56413	0.131622	0.719075
13870936	0.633869	0.323732	0.302784	0.0370504	0.244668	0.204021	0.296018	0.249559	0.563034
6566064	0.633921	0.497426	0.424381	0.059235	0.226358	0.151995	0.562001	0.384584	0.874529
97480	0.633921	0.497426	0.424381	0.059235	0.226358	0.151995	0.562001	0.384584	0.874529
7099911	0.633921	0.497426	0.424381	0.059235	0.226358	0.151995	0.562001	0.384584	0.874529
18881	0.633921	0.497426	0.424381	0.059235	0.226358	0.151995	0.562001	0.384584	0.874529
23617998	0.633921	0.497426	0.424381	0.059235	0.226358	0.151995	0.562001	0.384584	0.874529
92161858	0.633952	0.329885	0.34014	0.0319016	0.194201	0.0173337	0.04593	0.052195	0.291085
271276	0.633952	0.329885	0.34014	0.0319016	0.194201	0.0173337	0.04593	0.052195	0.291085
24820718	0.633974	0.336319	0.427621	0.157407	0.208548	0.24138	0.162204	0.0401298	0.421789
13188936	0.63409	0.730993	0.350674	0.0451702	0.233534	0.040573	0.0984672	0.0638981	0.316705
171798	0.634116	0.425444	0.38871	0.0770335	0.221912	0.058391	0.64547	0.254191	0.837104
150625	0.634191	0.763712	0.388541	0.119871	0.263682	0.0135329	0.0417816	0.0513493	0.343485
92233380	0.634333	0.587311	0.43059	0.243407	0.281966	0.122107	0.259079	0.724788	0.617259
131881445	0.634333	0.587311	0.43059	0.243407	0.281966	0.122107	0.259079	0.724788	0.617259
136795196	0.63442	0.464597	0.390812	0.185776	0.213747	0.0624383	0.467312	0.678251	0.635073
136670059	0.63442	0.464597	0.390812	0.185776	0.213747	0.0624383	0.467312	0.678251	0.635073
451960	0.634438	0.589272	0.387464	0.135935	0.186625	0.574384	0.311625	0.325086	0.621686
121487106	0.634569	0.417656	0.416427	0.350627	0.276596	0.0221623	0.194285	0.192126	0.439707
129787857	0.63459	0.500013	0.393112	0.0866379	0.198455	0.156959	0.39524	0.367538	0.61509
456327	0.634747	0.739921	0.375838	0.105177	0.209193	0.0364887	0.207153	0.553377	0.719702
461854	0.634747	0.739921	0.375838	0.105177	0.209193	0.0364887	0.207153	0.553377	0.719702
456648	0.634747	0.739921	0.375838	0.105177	0.209193	0.0364887	0.207153	0.553377	0.719702
146674673	0.634872	0.523152	0.377948	0.0628408	0.23506	0.357722	0.142827	0.263874	0.564945
3006944	0.634971	0.332814	0.362679	0.148846	0.186722	0.14613	0.0693028	0.197221	0.510757
493453	0.635011	0.282534	0.368957	0.191578	0.154707	0.0765305	0.360793	0.362353	0.507461
131853290	0.635032	0.776919	0.446231	0.122368	0.167442	0.0776203	0.432917	0.423113	0.573948
135921348	0.635075	0.957488	0.472037	0.0695564	0.213579	0.260139	0.24399	0.445613	0.462649
121217041	0.635114	0.138631	0.414185	0.0579519	0.254497	0.155785	0.482827	0.492147	0.616364
54343230	0.635367	0.398511	0.366033	0.258047	0.266377	0.0192624	0.200972	0.0864831	0.502307
131884262	0.635511	0.226871	0.396004	0.0819029	0.207357	0.0507702	0.389869	0.442257	0.602389
58078371	0.635708	0.484831	0.359299	0.361527	0.265714	0.622135	0.0874219	0.0635153	0.569943
121487074	0.636039	0.312877	0.412816	0.0381165	0.255163	0.0652487	0.0932196	0.0553127	0.264535
3011894	0.636236	0.371872	0.421042	0.153112	0.224209	0.674655	0.545751	0.723995	0.787169
131880513	0.636321	0.0724393	0.337104	0.0242631	0.222944	0.0862314	0.219057	0.865914	0.737813
90356982	0.63636	0.521262	0.427342	0.218082	0.196229	0.019736	0.100693	0.164077	0.464508
452090	0.636398	0.582145	0.361399	0.102718	0.2257	0.0447459	0.28985	0.349273	0.670956
509522	0.636398	0.582145	0.361399	0.102718	0.2257	0.0447459	0.28985	0.349273	0.670956
121486893	0.636427	0.144996	0.358836	0.189067	0.189625	0.0489106	0.484154	0.64443	0.398374
11776820	0.636441	0.118215	0.323163	0.0294473	0.172225	0.320798	0.736271	0.503637	0.796549
10041129	0.636884	0.118342	0.32006	0.0239451	0.192184	0.0459789	0.264343	0.729828	0.756559
29982346	0.637027	0.490118	0.45319	0.0943954	0.306026	0.115558	0.166999	0.741337	0.666383
45039581	0.637027	0.490118	0.45319	0.0943954	0.306026	0.115558	0.166999	0.741337	0.666383
11697766	0.637027	0.490118	0.45319	0.0943954	0.306026	0.115558	0.166999	0.741337	0.666383
45052066	0.637029	0.0845635	0.352911	0.0493397	0.220085	0.0433818	0.100333	0.0096824	0.49085
156594694	0.637029	0.0845635	0.352911	0.0493397	0.220085	0.0433818	0.100333	0.0096824	0.49085
512705	0.637202	0.279881	0.372684	0.139556	0.167166	0.274301	0.401638	0.211279	0.497317
129561	0.637249	0.158324	0.343888	0.0216609	0.17402	0.0552301	0.26766	0.561796	0.569759
9813298	0.63725	0.541235	0.407368	0.139533	0.208846	0.548346	0.0520362	0.0586144	0.391484
10610233	0.637298	0.670869	0.329185	0.177999	0.232817	0.011507	0.0757797	0.0434093	0.534944
454870	0.63731	0.197642	0.352418	0.0908668	0.242343	0.0651315	0.488461	0.930145	0.57057
330407	0.637327	0.767708	0.376647	#N/A	0.245193	0.0116465	0.0515176	0.0929716	0.409693
131881789	0.637327	0.767708	0.376647	0.0458938	0.245193	0.0116465	0.0515176	0.0929716	0.409693
5270525	0.63733	0.767901	0.386986	0.239557	0.229109	0.0326929	0.369246	0.298952	0.75647
67566518	0.637707	0.625578	0.401802	0.331204	0.22895	0.0268011	0.0705463	0.0820574	0.48551
11622526	0.637718	0.309235	0.308396	0.0363377	0.204024	0.098646	0.154018	0.0142108	0.693818
234984	0.637776	0.6595	0.339673	0.0301607	0.240064	0.156569	0.281719	0.448035	0.72645
191626	0.637785	0.594275	0.443381	0.201207	0.272388	0.724589	0.14663	0.361331	0.370135
10357262	0.637845	0.310617	0.411423	0.0531098	0.240481	0.301884	0.525145	0.436991	0.697877
21855714	0.637939	0.555073	0.426171	0.115656	0.158736	0.0569429	0.516591	0.385511	0.553209
145681	0.637996	0.714803	0.387177	0.0466463	0.245774	0.0159565	0.0427618	0.0388753	0.472437
501517	0.638131	0.092994	0.321074	0.0457849	0.189207	0.290538	0.565278	0.479783	0.798276
482589	0.638329	0.120269	0.414591	0.140368	0.257776	0.68257	0.764445	0.822831	0.830136
10019708	0.638331	0.333934	0.336086	0.0741585	0.284503	0.0608786	0.237803	0.598125	0.79514
92229125	0.638338	0.210354	0.390348	0.0461752	0.212088	0.0586244	0.308047	0.577582	0.649355
44451061	0.638338	0.210354	0.390348	0.0461752	0.212088	0.0586244	0.308047	0.577582	0.649355
167798	0.638368	0.658243	0.397679	0.0949199	0.189851	0.0134611	0.056758	0.287827	0.661598
56851256	0.638511	0.387545	0.367726	0.0474056	0.26278	0.228763	0.184946	0.154769	0.458302
11097661	0.63853	0.64182	0.390831	0.098805	0.233874	0.0280829	0.0629169	0.0475416	0.443671
296237	0.638751	0.106977	0.323343	0.0440574	0.184896	0.015415	0.199713	0.745656	0.50299
155905982	0.638765	0.532935	0.357736	0.108675	0.214411	0.0140722	0.100617	0.0515102	0.56353
93982611	0.638871	0.200605	0.37411	0.0888492	0.203097	0.0631771	0.472488	0.913244	0.801632
135415644	0.639112	0.537383	0.393019	0.145616	0.206866	0.308	0.163042	0.640902	0.605626
451554	0.639128	0.568349	0.389236	0.091091	0.151508	0.686242	0.384575	0.39015	0.622819
122174083	0.639152	0.09991	0.346409	0.0229312	0.220681	0.053907	0.146651	0.00877747	0.480568
45052344	0.639264	0.22001	0.413841	0.173402	0.257132	0.0641444	0.0331014	0.193439	0.37362
495537	0.639686	0.160038	0.336112	0.0343799	0.158634	0.811663	0.62256	0.709921	0.706708
44563542	0.63979	0.38304	0.423337	0.0439398	0.242718	0.0981641	0.391008	0.477123	0.834694
21627889	0.63993	0.319848	0.341141	0.0524817	0.279828	0.230231	0.152711	0.0438481	0.45817
122129480	0.639973	0.182617	0.434107	0.115498	0.232349	0.0128892	0.0502734	0.0934483	0.425139
10105820	0.639986	0.568233	0.340796	0.225326	0.175214	0.0279739	0.109879	0.0204665	0.678342
163320923	0.640021	0.303566	0.405722	0.284863	0.219942	0.0183547	0.164529	0.0747353	0.495984
131851102	0.640046	0.460287	0.410603	0.061986	0.244357	0.117248	0.36054	0.554277	0.610914
135696522	0.640089	0.767014	0.367284	0.15561	0.192387	0.0444468	0.301239	0.420414	0.605761
136045770	0.640089	0.767014	0.367284	0.15561	0.192387	0.0444468	0.301239	0.420414	0.605761
135403914	0.640089	0.767014	0.367284	0.15561	0.192387	0.0444468	0.301239	0.420414	0.605761
135812388	0.640089	0.767014	0.367284	0.15561	0.192387	0.0444468	0.301239	0.420414	0.605761
135434786	0.640101	0.429179	0.346135	0.0562871	0.220024	0.0431081	0.187956	0.206201	0.449318
102063598	0.640205	0.489832	0.378124	0.0803218	0.271783	0.0133172	0.0663148	0.0323118	0.552052
71340337	0.640309	0.247373	0.363308	0.117123	0.212193	0.135073	0.628981	0.240369	0.715183
451616	0.640309	0.247373	0.363308	0.117123	0.212193	0.135073	0.628981	0.240369	0.715183
92209628	0.640318	0.495421	0.399923	0.125431	0.191299	0.120458	0.0537833	0.0248753	0.530001
7088272	0.640318	0.495421	0.399923	0.125431	0.191299	0.120458	0.0537833	0.0248753	0.530001
97577	0.640318	0.495421	0.399923	0.125431	0.191299	0.120458	0.0537833	0.0248753	0.530001
152521	0.640412	0.366111	0.437297	0.116362	0.270216	0.10197	0.260196	0.419733	0.683473
155903793	0.640601	0.426646	0.422087	0.0736722	0.221545	0.0600363	0.621467	0.245596	0.834972
3000303	0.640696	0.51139	0.355946	0.433	0.170859	0.138416	0.774263	0.377579	0.81461
3000242	0.640696	0.51139	0.355946	0.433	0.170859	0.138416	0.774263	0.377579	0.81461
595375	0.640715	0.605761	0.394734	0.250551	0.199879	0.683774	0.374911	0.698824	0.528988
90673985	0.640722	0.330643	0.39727	0.20217	0.261127	0.159334	0.402048	0.368692	0.825366
40506074	0.640796	0.0546311	0.379022	0.081612	0.199184	0.00865937	0.0485531	0.0188147	0.370406
3000824	0.640796	0.0546311	0.379022	0.081612	0.199184	0.00865937	0.0485531	0.0188147	0.370406
277822	0.640796	0.0546311	0.379022	#N/A	0.199184	0.00865937	0.0485531	0.0188147	0.370406
512178	0.640834	0.397854	0.363275	#N/A	0.216852	0.0926606	0.0770715	0.023589	0.592019
356732	0.640938	0.263159	0.359762	0.0284966	0.233221	0.04842	0.261819	0.461815	0.764098
167321	0.640938	0.263159	0.359762	0.0284966	0.233221	0.04842	0.261819	0.461815	0.764098
22211279	0.64118	0.552708	0.441641	0.142232	0.246408	0.018438	0.0664994	0.0355777	0.418585
124430633	0.641223	0.312914	0.433584	0.037684	0.224334	0.106076	0.137981	0.243272	0.751063
124430634	0.641223	0.312914	0.433584	0.037684	0.224334	0.106076	0.137981	0.243272	0.751063
135504147	0.641252	0.62696	0.418166	0.191122	0.1797	0.748623	0.326828	0.659248	0.649457
175972	0.641254	0.387975	0.385843	0.25854	0.227573	0.0292703	0.50902	0.43208	0.807001
15289164	0.641406	0.943076	0.409373	0.488515	0.372422	0.373873	0.60084	0.859797	0.754658
72212336	0.641406	0.943076	0.409373	0.488515	0.372422	0.373873	0.60084	0.859797	0.754658
11807674	0.641443	0.425739	0.41349	0.0770335	0.220774	0.056644	0.615522	0.260623	0.835546
70889269	0.641607	0.4212	0.388745	0.0770335	0.219319	0.0593953	0.646955	0.255455	0.835983
644174	0.641607	0.4212	0.388745	0.0770335	0.219319	0.0593953	0.646955	0.255455	0.835983
6560357	0.641607	0.4212	0.388745	0.0770335	0.219319	0.0593953	0.646955	0.255455	0.835983
21704	0.641607	0.4212	0.388745	#N/A	#N/A	0.0593953	0.646955	0.255455	0.835983
638036	0.641607	0.4212	0.388745	0.0770335	0.219319	0.0593953	0.646955	0.255455	0.835983
10890867	0.641607	0.423231	0.388907	0.0770335	0.221008	0.0593953	0.659307	0.252656	0.83626
5702004	0.641607	0.4212	0.388745	0.0770335	0.219319	0.0593953	0.646955	0.255455	0.835983
6420052	0.641607	0.4212	0.388745	0.0770335	0.219319	0.0593953	0.646955	0.255455	0.835983
447916	0.641607	0.4212	0.388745	0.0770335	0.219319	0.0593953	0.646955	0.255455	0.835983
121486812	0.641607	0.423454	0.388719	0.0770335	0.221008	0.0629414	0.659307	0.252656	0.83626
12358320	0.641607	0.4212	0.388745	0.0770335	0.219319	0.0593953	0.646955	0.255455	0.835983
12358321	0.641607	0.423073	0.38855	0.0770335	0.219319	0.056644	0.646955	0.255455	0.83626
12358325	0.641607	0.423721	0.388719	0.0770335	0.221008	0.0629414	0.659307	0.252656	0.83626
453548	0.641607	0.4212	0.388745	0.0770335	0.219319	0.0593953	0.646955	0.255455	0.835983
448378	0.641607	0.4212	0.388745	0.0770335	0.219319	0.0593953	0.646955	0.255455	0.835983
53384930	0.641607	0.4212	0.388745	0.0770335	0.219319	0.0593953	0.646955	0.255455	0.835983
54732806	0.641607	0.4212	0.388745	0.0770335	0.219319	0.0593953	0.646955	0.255455	0.835983
7040251	0.641607	0.4212	0.388745	0.0770335	0.219319	0.0593953	0.646955	0.255455	0.835983
23279550	0.641607	0.427237	0.411543	0.0770335	0.222346	0.0593953	0.634207	0.256424	0.8361
139025871	0.641607	0.424856	0.388357	0.0770335	0.219319	0.0600363	0.645492	0.25477	0.836543
12358322	0.641607	0.42319	0.388753	0.0770335	0.219319	0.056644	0.646955	0.257604	0.83626
160739	0.641607	0.4212	0.388745	0.0770335	0.219319	0.0593953	0.646955	0.255455	0.835983
191	0.641607	0.4212	0.388745	0.0770335	#N/A	0.0593953	0.646955	0.255455	0.835983
122130566	0.64176	0.412427	0.403383	0.0561445	0.201777	0.0843197	0.193066	0.309144	0.504642
54432316	0.641895	0.942006	0.46569	#N/A	0.263634	0.0389842	0.0912939	0.0825493	0.339866
3034648	0.641897	0.532511	0.401761	0.123271	0.21066	0.245571	0.417185	0.535422	0.661845
3034638	0.641897	0.532511	0.401761	0.123271	0.21066	0.245571	0.417185	0.535422	0.661845
10923602	0.641925	0.427429	0.442932	0.0770335	0.224187	0.0629414	0.626988	0.260395	0.835121
10492175	0.641925	0.42657	0.433845	0.0770335	0.221552	0.0593953	0.629516	0.258645	0.835127
71442564	0.641925	0.568179	0.380428	0.119204	0.163327	0.0233347	0.344425	0.751792	0.696152
11311566	0.642055	0.474736	0.361915	0.0549327	0.216504	0.0462674	0.0975538	0.0588169	0.377626
452612	0.642085	0.0734019	0.275604	0.00913218	0.202371	0.426254	0.476822	0.485968	0.539577
126283	0.642094	0.206462	0.361369	0.118488	0.224912	0.242297	0.0775127	0.0240394	0.546581
459903	0.642094	0.206462	0.361369	0.118488	0.224912	0.242297	0.0775127	0.0240394	0.546581
135410302	0.642122	0.643524	0.373942	0.414724	0.180085	0.0527346	0.129909	0.457144	0.553391
14464884	0.642271	0.440918	0.412084	0.139622	0.186225	0.17768	0.199711	0.399435	0.55761
259345	0.642613	0.249516	0.422817	0.207665	0.224378	0.0181452	0.479573	0.465431	0.600453
511763	0.642661	0.36418	0.340751	0.187283	0.174708	0.10548	0.355447	0.483348	0.598635
51414401	0.642773	0.410423	0.426071	0.0563688	0.143075	0.149045	0.539153	0.163349	0.529018
146108	0.642773	0.410423	0.426071	0.0563688	0.143075	0.149045	0.539153	0.163349	0.529018
13831291	0.642773	0.410423	0.426071	0.0563688	0.143075	0.149045	0.539153	0.163349	0.529018
22884229	0.642779	0.336937	0.396102	0.0945728	0.22592	0.021391	0.106831	0.0531819	0.322825
15955633	0.642795	0.687775	0.379389	0.152182	0.213132	0.107013	0.380665	0.575847	0.767988
121219141	0.642795	0.687775	0.379389	0.152182	0.213132	0.107013	0.380665	0.575847	0.767988
15410715	0.643234	0.142338	0.297051	0.0467675	0.218901	0.118772	0.560825	0.695216	0.355347
11346304	0.643254	0.737793	0.359922	0.0723574	0.224873	0.0807174	0.0965864	0.0792026	0.472271
21580289	0.643392	0.425712	0.42199	0.0770335	0.22065	0.056644	0.609989	0.267533	0.83662
135627705	0.64344	0.710358	0.390178	0.114364	0.249232	0.157961	0.180838	0.286036	0.595043
136062166	0.64344	0.710358	0.390178	0.114364	0.249232	0.157961	0.180838	0.286036	0.595043
135933068	0.64344	0.710358	0.390178	0.114364	0.249232	0.157961	0.180838	0.286036	0.595043
135622951	0.64344	0.710358	0.390178	0.114364	0.249232	0.157961	0.180838	0.286036	0.595043
136826947	0.64344	0.710358	0.390178	0.114364	0.249232	0.157961	0.180838	0.286036	0.595043
136065188	0.64344	0.710358	0.390178	0.114364	0.249232	0.157961	0.180838	0.286036	0.595043
54518623	0.643476	0.537344	0.411089	0.174477	0.273485	0.129289	0.349453	0.560506	0.826759
2729604	0.64351	0.395891	0.380969	0.0936696	0.228535	0.0226302	0.0797237	0.0135744	0.529317
94196	0.64351	0.395891	0.380969	0.0936696	0.228535	0.0226302	0.0797237	0.0135744	0.529317
7059462	0.64351	0.395891	0.380969	0.0936696	0.228535	0.0226302	0.0797237	0.0135744	0.529317
7195995	0.64351	0.395891	0.380969	0.0936696	0.228535	0.0226302	0.0797237	0.0135744	0.529317
68206315	0.64351	0.395891	0.380969	0.0936696	0.228535	0.0226302	0.0797237	0.0135744	0.529317
1263225	0.64351	0.395891	0.380969	0.0936696	0.228535	0.0226302	0.0797237	0.0135744	0.529317
27661670	0.64351	0.395891	0.380969	0.0936696	0.228535	0.0226302	0.0797237	0.0135744	0.529317
9992804	0.643614	0.791733	0.410196	0.134999	0.246431	0.0526976	0.0971911	0.0190289	0.593128
6536767	0.643832	0.362381	0.331911	#N/A	0.239539	0.240614	0.502572	0.473469	0.671269
5273934	0.643832	0.362381	0.331911	0.0987198	0.239539	0.240614	0.502572	0.473469	0.671269
21854434	0.643836	0.484509	0.41844	0.0300516	0.238569	0.0898617	0.377185	0.729926	0.820066
161583	0.643901	0.400093	0.407139	0.140732	0.245464	0.00975376	0.153643	0.056338	0.549574
9992648	0.644284	0.541768	0.439588	0.148743	0.230494	0.210549	0.148178	0.0741411	0.628763
7269451	0.644284	0.541768	0.439588	0.148743	0.230494	0.210549	0.148178	0.0741411	0.628763
13887579	0.644284	0.541768	0.439588	0.148743	0.230494	0.210549	0.148178	0.0741411	0.628763
107643	0.644284	0.541768	0.439588	0.148743	0.230494	0.210549	0.148178	0.0741411	0.628763
92132277	0.644284	0.541768	0.439588	0.148743	0.230494	0.210549	0.148178	0.0741411	0.628763
21825596	0.64431	0.385251	0.307575	0.193312	0.212672	0.0247291	0.107432	0.058819	0.620948
87825371	0.64441	0.0974434	0.357666	0.0337463	0.243941	0.0420509	0.258579	0.53804	0.553868
90663906	0.644423	0.934308	0.426201	0.225854	0.245434	0.0310439	0.126958	0.123232	0.442103
512134	0.644642	0.786198	0.424115	0.0843631	0.259802	0.0397413	0.561652	0.457581	0.838047
92264929	0.644642	0.786198	0.424115	0.0843631	0.259802	0.0397413	0.561652	0.457581	0.838047
333596	0.644642	0.786198	0.424115	0.0843631	0.259802	0.0397413	0.561652	0.457581	0.838047
98581	0.644721	0.670631	0.315618	0.169016	0.229883	0.010814	0.0777554	0.0299044	0.528248
481523	0.644795	0.81265	0.375394	0.417089	0.302714	0.430889	0.222738	0.360381	0.553895
3005947	0.644821	0.463507	0.323716	0.116082	0.252669	0.507054	0.155553	0.0463297	0.435095
3006523	0.644855	0.924894	0.44361	0.305621	0.26941	0.0331984	0.113778	0.396352	0.466178
3006522	0.644855	0.924894	0.44361	0.305621	0.26941	0.0331984	0.113778	0.396352	0.466178
21139907	0.64503	0.261063	0.415997	0.0946867	0.216757	0.0311415	0.542717	0.391679	0.83618
13833767	0.64503	0.261063	0.415997	0.0946867	0.216757	0.0311415	0.542717	0.391679	0.83618
259853	0.64503	0.261063	0.415997	0.0946867	0.216757	0.0311415	0.542717	0.391679	0.83618
121487089	0.64509	0.921901	0.455022	0.0476528	0.263374	0.241144	0.213192	0.183058	0.442676
21456083	0.645467	0.235263	0.336292	0.119164	0.249685	0.239046	0.243944	0.072194	0.579185
3005950	0.645467	0.235263	0.336292	0.119164	0.249685	0.239046	0.243944	0.072194	0.579185
10377839	0.645784	0.575627	0.431836	0.186825	0.214928	0.0718662	0.104558	0.0648749	0.708497
197020	0.645784	0.575627	0.431836	0.186825	0.214928	0.0718662	0.104558	0.0648749	0.708497
76282776	0.645815	0.331685	0.431419	0.239342	0.219885	0.114171	0.153332	0.470197	0.473615
161746	0.645945	0.418349	0.406866	0.0859539	0.241383	0.0094069	0.0932276	0.0290792	0.518436
131883911	0.645947	0.427112	0.41932	0.0770335	0.22065	0.0593953	0.611511	0.26533	0.836936
131883912	0.645947	0.428543	0.420373	0.0770335	0.22065	0.056644	0.609989	0.264078	0.836936
478560	0.645984	0.589159	0.428481	0.0386933	0.201442	0.331895	0.434689	0.199202	0.67317
131878904	0.646179	0.809747	0.41734	0.0807833	0.164677	0.0513764	0.492528	0.336696	0.632614
258357	0.646179	0.809747	0.41734	#N/A	0.164677	0.0513764	0.492528	0.336696	0.632614
23541118	0.646247	0.672889	0.390025	0.187656	0.267354	0.0219542	0.0419395	0.0545772	0.367135
154705590	0.646396	0.474864	0.411067	0.266641	0.250543	0.467319	0.387699	0.262581	0.607919
57349456	0.646479	0.553462	0.39423	0.0666084	0.29385	0.381149	0.625693	0.526784	0.819455
23519664	0.646599	0.715881	0.431633	0.302603	0.273123	0.3093	0.081359	0.0388907	0.593361
131876227	0.646653	0.127724	0.4029	0.152433	0.251739	0.0629389	0.21635	0.00892296	0.451514
102129315	0.646778	0.120376	0.387934	0.0449046	0.161605	0.00661781	0.419411	0.120461	0.431147
101658091	0.646961	0.147721	0.367585	0.201233	0.234746	0.00522352	0.057813	0.0859795	0.410546
23253577	0.64698	0.668652	0.353208	0.109994	0.247803	0.0302775	0.404571	0.843357	0.797642
135538696	0.647339	0.686526	0.398722	0.199946	0.22154	0.61523	0.117077	0.606942	0.603922
259661	0.647448	0.247386	0.323468	0.0774182	0.154489	0.272447	0.226333	0.588196	0.633935
44304177	0.64747	0.424598	0.401637	0.37054	0.223146	0.00782455	0.117253	0.269546	0.43899
10424703	0.647477	0.599391	0.354723	0.113843	0.202715	0.205257	0.362958	0.725476	0.767456
5289205	0.647613	0.419618	0.435826	0.0858026	0.248163	0.0671256	0.138249	0.106989	0.680617
138059312	0.647644	0.368163	0.362077	0.0744274	0.177107	0.189875	0.119231	0.287141	0.389777
134693185	0.647711	0.753932	0.385714	0.0735841	0.292119	0.207926	0.160485	0.227686	0.598517
12873547	0.647711	0.753932	0.385714	0.0735841	0.292119	0.207926	0.160485	0.227686	0.598517
6451965	0.647711	0.753932	0.385714	0.0735841	0.292119	0.207926	0.160485	0.227686	0.598517
92132221	0.647711	0.753932	0.385714	0.0735841	0.292119	0.207926	0.160485	0.227686	0.598517
149094	0.647779	0.533968	0.451758	0.152528	0.253813	0.107059	0.114082	0.0771013	0.605352
21824453	0.647787	0.700408	0.348615	0.0791964	0.224977	0.0926714	0.161142	0.0181392	0.507901
21732373	0.647911	0.573445	0.354677	0.0698548	0.212314	0.0271818	0.118268	0.0124344	0.428685
162367440	0.647911	0.573445	0.354677	0.0698548	0.212314	0.0271818	0.118268	0.0124344	0.428685
21856228	0.647911	0.573445	0.354677	0.0698548	0.212314	0.0271818	0.118268	0.0124344	0.428685
515221	0.6481	0.470604	0.420471	0.157178	0.238759	0.0522565	0.42752	0.34575	0.858421
13871052	0.648181	0.383808	0.396995	0.236272	0.139682	0.202242	0.254291	0.26171	0.46522
156588731	0.648202	0.568937	0.365186	0.119564	0.199498	0.0562315	0.0706684	0.314562	0.491396
135542427	0.648217	0.756527	0.408742	0.113695	0.204257	0.195408	0.150725	0.577495	0.64145
3035490	0.648262	0.768308	0.384086	0.175776	0.223294	0.710894	0.170641	0.296219	0.600733
121487046	0.648268	0.257909	0.366945	0.37109	0.209077	0.0686495	0.217241	0.146182	0.528922
14428908	0.648281	0.369435	0.399195	0.128015	0.225399	0.139604	0.184516	0.0362437	0.53176
3000770	0.648458	0.491223	0.364087	#N/A	0.30416	0.0230591	0.0420897	0.0050197	0.322553
158379	0.648656	0.782588	0.405512	0.110718	0.175364	0.222657	0.428557	0.247187	0.703836
122130879	0.648722	0.690688	0.375802	0.110442	0.183358	0.136904	0.0844749	0.260298	0.479575
14581958	0.648746	0.779354	0.427622	0.0635102	0.110564	0.0944414	0.38314	0.0986193	0.42952
371485	0.648891	0.382572	0.321325	0.0307866	0.158805	0.174214	0.594424	0.814841	0.685246
21140199	0.648898	0.477043	0.431166	0.122151	0.233926	0.18799	0.437535	0.432576	0.756784
10849624	0.649267	0.283637	0.424507	0.190621	0.223895	0.131016	0.0606465	0.044854	0.423809
539847	0.64927	0.545434	0.416031	0.113783	0.225215	0.00844463	0.163507	0.229703	0.56663
10538309	0.649326	0.545803	0.359583	0.133739	0.199774	0.0226355	0.162247	0.0282426	0.683866
90673796	0.649376	0.313364	0.405927	0.131194	0.242402	0.454268	0.117864	0.0854949	0.476911
10807167	0.649387	0.144267	0.389969	0.0430294	0.231998	0.0501311	0.303744	0.534523	0.681363
54471624	0.649448	0.309542	0.42223	0.283664	0.282226	0.0573039	0.48061	0.804016	0.855043
3010090	0.649787	0.650719	0.347019	#N/A	0.341999	0.033227	0.119734	0.00760071	0.433853
688097	0.649809	0.213273	0.343727	0.0262594	0.179837	0.0124694	0.29008	0.679515	0.763577
439176	0.649809	0.213273	0.343727	0.0262594	0.179837	0.0124694	0.29008	0.679515	0.763577
58108938	0.649809	0.213273	0.343727	0.0262594	0.179837	0.0124694	0.29008	0.679515	0.763577
149	0.649809	0.213273	0.343727	0.0262594	0.179837	0.0124694	0.29008	0.679515	0.763577
99302	0.649809	0.213273	0.343727	0.0262594	0.179837	0.0124694	0.29008	0.679515	0.763577
102122294	0.64997	0.582721	0.333354	0.0215847	0.194545	0.140993	0.233503	0.814485	0.574856
453194	0.649984	0.183959	0.352367	0.129898	0.280941	0.0519388	0.477378	0.91377	0.590511
453193	0.649984	0.183959	0.352367	0.129898	0.280941	0.0519388	0.477378	0.91377	0.590511
69762616	0.650131	0.194105	0.413039	0.113619	0.228796	0.361323	0.399786	0.467344	0.775349
12777828	0.650289	0.282651	0.39454	0.0201005	0.142751	0.575866	0.140801	0.714217	0.316941
21854431	0.650307	0.437438	0.441005	0.0986438	0.219793	0.25181	0.524916	0.66849	0.860699
11174347	0.650432	0.579915	0.41279	0.0769907	0.259754	0.199688	0.445427	0.474914	0.714039
513716	0.650572	0.0883745	0.307029	0.0208525	0.214428	0.177432	0.497824	0.40653	0.706777
101190254	0.650703	0.536139	0.394663	0.0448693	0.229986	0.0128531	0.0272806	0.0181415	0.307012
512139	0.650796	0.930273	0.416404	0.0922983	0.246755	0.00781552	0.239572	0.201734	0.684425
21120714	0.650873	0.620876	0.390494	#N/A	0.222616	0.189296	0.074156	0.0316474	0.480629
126501	0.650873	0.620876	0.390494	0.5069	0.222616	0.189296	0.074156	0.0316474	0.480629
56627067	0.650901	0.283494	0.399592	0.0983278	0.210603	0.102444	0.555492	0.467854	0.818495
[truncated: 4,819 more rows]

## Sheet: 1. Toxicology
cid	Probability of nontox
5273008	0.181644
5273004	0.198203
250899	0.203479
15926747	0.207072
9882903	0.207072
354624	0.207072
13989334	0.209321
13989335	0.209321
492197	0.21189
6483433	0.215533
516053	0.219322
3034808	0.224004
14485373	0.224004
470067	0.22448
12777818	0.224815
87824027	0.225394
296233	0.225394
21147181	0.228426
24867261	0.228426
14330066	0.238835
14330067	0.238835
53791036	0.240896
92132405	0.241071
69626224	0.241071
11778706	0.241071
10040688	0.241261
77844687	0.241261
492559	0.242922
12777820	0.247487
492201	0.250043
14803115	0.252416
14803116	0.252416
5487206	0.257013
492117	0.258625
492116	0.258625
13989343	0.260788
162354766	0.263569
15172869	0.2646
3009936	0.269213
90487625	0.269544
11551453	0.271994
9965654	0.277084
14284094	0.282173
511719	0.282717
21140106	0.282779
15573114	0.285012
9879442	0.285012
15573115	0.285012
44398142	0.285012
40488632	0.285012
8974	0.285012
44629847	0.285012
11957496	0.285012
6603778	0.285012
504745	0.291944
71775556	0.292333
124201	0.293693
493452	0.293986
287709	0.297555
22791353	0.297697
128924	0.298537
92132157	0.299434
73265308	0.299434
147569	0.299434
6602111	0.299434
90488943	0.299434
13009312	0.299434
265574	0.299618
24906265	0.299618
10085225	0.299618
92236137	0.299618
92236135	0.299618
16760678	0.299618
131846804	0.299618
154726303	0.299892
493454	0.300593
197610	0.302507
10517505	0.302507
9973143	0.305869
56977943	0.306384
100938413	0.309774
14018661	0.30996
13989345	0.311721
470065	0.31196
44626655	0.313426
21140467	0.315924
512717	0.317893
121486905	0.318323
512127	0.321107
71305626	0.321107
46874399	0.321107
45038620	0.321107
92233558	0.321107
10039594	0.322079
492200	0.325933
121486895	0.326328
3010354	0.329609
125496047	0.329949
21139599	0.330015
7173845	0.334989
102197	0.334989
46874491	0.334989
45358303	0.334989
44629881	0.334989
45357254	0.334989
21797130	0.334989
3012227	0.337637
464373	0.338039
3061100	0.33858
50989994	0.33858
492561	0.343953
21815879	0.345448
3007217	0.349975
21116879	0.350605
7065210	0.350605
93003	0.350605
44629860	0.350605
11098172	0.3533
350834	0.353952
6481604	0.354255
10565387	0.354511
10946143	0.354928
126968624	0.354943
21854299	0.354943
130712	0.355891
57346774	0.356336
6478491	0.356426
456109	0.358797
10517504	0.359973
10380149	0.360532
121486870	0.361367
584362	0.363996
10686845	0.365859
72212339	0.366376
11162398	0.368305
10934996	0.368682
92132092	0.368682
334830	0.368682
512555	0.370087
71431122	0.371324
126969176	0.371324
131887892	0.372113
131880518	0.372669
66524133	0.3732
163285340	0.373811
71314761	0.374547
469442	0.376477
466018	0.376511
54101611	0.377275
10220985	0.377275
6441200	0.377275
14803093	0.377275
118989478	0.377275
54101612	0.377275
129653012	0.377481
94480465	0.379017
9882803	0.379017
10471224	0.381929
72201	0.383034
14485380	0.383034
100327	0.383371
324309	0.383371
5273014	0.384665
13072932	0.386549
40468020	0.386549
68197667	0.386549
42553747	0.386549
54669720	0.386549
16129586	0.386549
53869019	0.386549
3367	0.386549
13072931	0.386549
8975	0.386549
44629914	0.386549
154716223	0.386549
46705411	0.386549
45039261	0.386549
503813	0.386846
131881042	0.389344
470053	0.390133
10946114	0.390469
134229959	0.390491
7043952	0.391535
6595184	0.391535
355280	0.391768
121487874	0.392346
128771	0.392692
15926748	0.393459
15926749	0.393459
71341063	0.394348
10356486	0.394348
10265867	0.394348
67785972	0.394348
481530	0.395175
121487869	0.395368
511720	0.398661
11808175	0.399292
98140	0.399292
11832914	0.399292
482505	0.399292
11087275	0.399292
504751	0.399625
92236361	0.40014
490627	0.402282
512128	0.402615
94001662	0.402941
91810866	0.402941
13108018	0.402941
24206417	0.402941
134695307	0.402941
1268279	0.402941
5327118	0.402941
13463	0.402941
131852786	0.404712
53908939	0.404966
6479249	0.405917
131858702	0.406423
484807	0.406566
472636	0.406831
260138	0.407578
121217040	0.407578
126916	0.407859
490444	0.410332
512679	0.410639
273017	0.410927
21121551	0.411821
15450711	0.411965
57216635	0.411965
163199084	0.411965
160751	0.411965
138114911	0.412878
6483431	0.412878
11243974	0.415106
12907243	0.415326
47751	0.415326
134714751	0.415326
1265902	0.415326
44629846	0.415326
45357134	0.415326
121487870	0.415419
13989347	0.416181
57368267	0.416181
464374	0.416707
7458588	0.417049
7058183	0.417049
22861745	0.417106
490440	0.41722
9925859	0.417492
102381544	0.417767
68742335	0.418629
11173824	0.419396
92237060	0.41952
97453	0.41952
5494430	0.419769
393545	0.419792
69527463	0.420174
504749	0.421267
92301827	0.42233
6482628	0.42233
49784135	0.422824
472638	0.423305
472656	0.423305
10588022	0.423513
10588021	0.423513
3011898	0.424223
469441	0.425351
21821295	0.42626
3012586	0.426426
121486770	0.42657
131883271	0.426603
57116127	0.426832
6976932	0.426832
27556867	0.426832
15607330	0.426832
100551	0.42789
466022	0.428607
10850803	0.430838
12939902	0.431541
12939901	0.431541
2777912	0.431541
44283163	0.431541
46783463	0.431541
96544	0.431541
10521478	0.431541
7070208	0.431541
688019	0.431541
90673794	0.431705
299952	0.432618
481082	0.433504
10108316	0.433625
6480510	0.433717
490628	0.433761
196788	0.433822
87824325	0.434172
5272658	0.434289
5273749	0.436044
5271377	0.436044
3009937	0.436197
5271782	0.437426
73351959	0.438876
155889717	0.439094
154706402	0.439094
5272659	0.439375
76973629	0.439445
92021270	0.439606
44633776	0.439606
3007216	0.440722
472657	0.441283
472639	0.441283
162653200	0.44163
447199	0.441638
10831407	0.441938
131858477	0.442092
131875471	0.442576
91150325	0.442711
6913230	0.442798
3363163	0.442798
503811	0.443066
459942	0.443433
247678	0.444122
10265835	0.444411
11119839	0.444457
87150598	0.444737
70610597	0.444938
643968	0.444938
5702211	0.444938
13071731	0.444938
43834572	0.444938
853012	0.444938
450214	0.444938
9881867	0.445243
10716626	0.445748
154701264	0.446109
14237950	0.446265
6426626	0.446265
23757287	0.44633
92262645	0.446357
131858479	0.446357
160418	0.446594
23518344	0.44695
118796809	0.447338
128557	0.447921
88101259	0.448368
452091	0.449131
58478862	0.449131
9971101	0.449131
472655	0.449555
49791785	0.449555
472632	0.449555
9994200	0.449672
22316435	0.449672
15677395	0.449672
76974063	0.450003
92228414	0.450829
11824	0.450829
512290	0.450829
247955	0.450829
73353418	0.451538
70587122	0.451705
54571321	0.451906
129009617	0.452682
451908	0.453529
76973399	0.454263
11779021	0.45476
490621	0.455172
490623	0.455172
131881813	0.455392
194101	0.456361
73442717	0.456821
92230799	0.456821
494271	0.457297
89858725	0.457299
447864	0.457625
69626062	0.457625
489877	0.457954
1468	0.45813
131708761	0.458504
10446782	0.459505
310052	0.459567
15612856	0.459567
5272657	0.459585
9948218	0.45982
71832128	0.460512
42553032	0.460512
42553033	0.460512
3011901	0.460676
6450904	0.460697
50989698	0.460697
360644	0.461831
21592214	0.462321
481083	0.462386
481081	0.462386
484808	0.462812
469861	0.46291
6479208	0.463281
101670692	0.463326
131880742	0.463872
15410716	0.46393
512680	0.464035
72501	0.464694
121487433	0.464965
3011924	0.466927
21829243	0.467247
14410899	0.467333
512286	0.467342
516040	0.467403
395997	0.468498
457015	0.468697
10067373	0.469512
10469813	0.469571
11737492	0.469886
161470	0.469969
455227	0.470077
92236337	0.470788
3006170	0.470788
92271256	0.471037
10357410	0.471064
10660621	0.471491
3011899	0.471527
14630157	0.47251
131853716	0.472532
6475236	0.473428
472814	0.473428
490625	0.473435
504747	0.473821
23545530	0.474044
44400589	0.47418
71262374	0.47418
5273019	0.474522
72212335	0.474727
14159235	0.474727
121486876	0.476194
387981	0.476453
10266777	0.476453
21157833	0.476663
454925	0.476798
93476651	0.477607
10019125	0.477607
3011897	0.477729
513632	0.477968
23616027	0.47803
44330586	0.47803
92209904	0.47803
21776949	0.47803
6245	0.47803
3007918	0.47803
92209902	0.47803
92846012	0.47803
9862222	0.478077
121578	0.478268
131855105	0.478511
131881061	0.478532
3067878	0.478558
513636	0.478611
9796412	0.478625
13566110	0.479093
42552658	0.4792
42552656	0.4792
11277569	0.479329
13922191	0.479883
29978508	0.479883
117810735	0.479883
92977577	0.479883
13922189	0.479883
9871558	0.479883
10859911	0.480178
97186	0.480603
46875292	0.480603
9881866	0.48093
280444	0.48093
189898	0.480972
167821	0.481161
44629858	0.481174
7048664	0.481174
124507746	0.481174
133688189	0.481174
688477	0.481174
17571993	0.481174
136260503	0.481267
11758878	0.481817
6482630	0.481915
193188	0.482078
490353	0.482179
491674	0.48267
72194	0.48267
359064	0.48267
92151285	0.48267
511670	0.483111
121487512	0.483111
86751195	0.483135
131708567	0.483249
131885779	0.483249
90472229	0.483412
451602	0.483604
134693115	0.483604
14312484	0.483604
5278282	0.484008
473280	0.484446
16760387	0.484581
16212026	0.484581
6175	0.484581
102602088	0.484581
121486971	0.484581
6603781	0.484581
121487027	0.484581
121487034	0.484581
160696	0.484581
12358851	0.484581
131701110	0.484581
6713582	0.484581
24729357	0.484581
5702244	0.484581
91142034	0.484581
596	0.484581
102601364	0.484581
67709179	0.484662
150851	0.484674
21122961	0.484674
29933626	0.484674
40544496	0.484674
44629873	0.484674
92268334	0.484674
3007908	0.484674
45358309	0.484674
3080719	0.485161
5273524	0.485161
175228	0.485224
21721736	0.486365
3083166	0.487074
6451079	0.488164
472637	0.488192
6480471	0.488307
76974604	0.488555
44396095	0.488778
21140838	0.488896
14806063	0.489009
196710	0.489009
6454537	0.489333
54192124	0.489333
121012732	0.489488
124528040	0.48949
21852781	0.490158
512658	0.490266
506143	0.490304
72968	0.490304
54069128	0.490332
91884695	0.490713
92043448	0.490713
65031	0.490713
76973301	0.490902
333691	0.490925
54041813	0.490925
21141083	0.491281
21732848	0.491601
22867782	0.491734
14702157	0.49211
473083	0.492203
71539312	0.492255
6483432	0.492336
15612862	0.49245
391266	0.493014
496474	0.493014
121427567	0.493278
11054511	0.493278
46705350	0.493278
13922196	0.493278
3461	0.493278
6093357	0.493278
45357852	0.493425
29924995	0.493425
490511	0.493506
6452137	0.493774
54260440	0.494208
71414969	0.494604
53322921	0.494752
9993207	0.49479
154701265	0.495706
326808	0.495839
44329981	0.495839
125507539	0.496216
353671	0.496431
131884918	0.496496
67841326	0.496546
67841222	0.496546
92253393	0.496623
92253390	0.496623
125124867	0.496623
14608008	0.496623
3007223	0.496673
135524757	0.496725
121487038	0.498898
100935585	0.498898
11749237	0.498953
510999	0.499553
136238397	0.499618
516072	0.500506
126915	0.500888
131858473	0.500936
11501773	0.50097
5272753	0.501607
3007224	0.501749
92258444	0.501875
10828395	0.501875
121487333	0.502301
92243788	0.502301
59048458	0.502615
469447	0.503142
92243924	0.503807
21144466	0.503807
121486913	0.503999
134694066	0.504224
29982328	0.504224
169662	0.504224
93604123	0.504224
44356940	0.504224
12042143	0.504224
92845691	0.504224
86288424	0.504314
470049	0.504394
465094	0.504394
139025281	0.504402
71315149	0.504402
7045516	0.504519
513124	0.504519
513122	0.504519
5894	0.504519
3010355	0.505946
57372617	0.506263
15024543	0.506966
25266884	0.507035
5278277	0.507493
49784203	0.508023
516074	0.508141
10405378	0.508539
90472732	0.508787
3007218	0.509222
131858474	0.509282
131885132	0.509539
14430336	0.509758
57348664	0.509881
21817599	0.509934
276394	0.509934
132663	0.509943
92270653	0.510106
500247	0.510106
86592812	0.510656
121596077	0.510714
59051498	0.511015
29980301	0.511015
20285	0.511015
46875049	0.511015
134694098	0.511015
16861	0.511015
12896821	0.511015
135511145	0.511184
472658	0.511345
472640	0.511345
6479521	0.511971
3010606	0.512019
498018	0.512166
25197	0.512268
240980	0.512268
515328	0.512268
60140908	0.512268
76973118	0.512546
44150017	0.51281
42607051	0.51281
15612873	0.514051
502232	0.514095
134067785	0.514697
490683	0.51473
490682	0.51473
3011895	0.515161
91927745	0.51528
14408976	0.515691
21144622	0.515716
5279426	0.516007
13009595	0.516191
5271785	0.516265
49784137	0.516286
92243975	0.516356
5273016	0.516411
324310	0.516411
475524	0.516475
461404	0.516475
16076142	0.516485
49849608	0.516494
455763	0.516606
512591	0.516984
510978	0.517065
270861	0.517068
470024	0.517068
14430375	0.517497
452097	0.517497
160067	0.517504
289971	0.518879
448403	0.518879
129862	0.518931
10264873	0.518935
13871050	0.519012
512601	0.519326
9942889	0.519382
15955042	0.519591
9562214	0.519747
92236380	0.519747
131876195	0.519747
516086	0.519761
51360252	0.519844
71380931	0.520219
510973	0.520251
490626	0.520501
464376	0.521143
451873	0.521221
67860541	0.521221
46780426	0.521395
133688245	0.521395
134481	0.521482
7308567	0.521482
67175601	0.521865
154809499	0.522162
54506098	0.522355
70684952	0.522383
96410	0.522383
72212535	0.522383
3009784	0.5231
9992803	0.52322
58463518	0.523349
131885191	0.523389
97119	0.52357
510971	0.523616
3039710	0.524065
57246734	0.524073
10849690	0.524073
9797705	0.524159
502229	0.524387
92242775	0.524413
3006169	0.524413
477413	0.524433
9842606	0.524828
121486815	0.524956
135618594	0.525019
56671903	0.525542
14806070	0.525708
6476927	0.525871
10037499	0.525879
59859763	0.525879
56995133	0.525879
29942411	0.525879
134694166	0.525879
67419448	0.525879
121606027	0.525988
11208563	0.526327
92243772	0.526527
21818173	0.526527
135618698	0.526763
135856077	0.526763
121486764	0.526914
493442	0.526983
159738	0.527434
46936923	0.527434
443234	0.527637
71317045	0.527894
11043124	0.528466
131881043	0.52847
25182693	0.528619
67358	0.528782
154731285	0.529317
100417	0.529546
21144431	0.529849
419564	0.529849
13830101	0.529888
128252	0.53006
21817596	0.530398
276398	0.530398
92237069	0.530398
131864833	0.530474
352989	0.530474
57357987	0.53069
21140332	0.53096
10999973	0.532062
127260544	0.532294
71407380	0.532294
16226669	0.532398
25796514	0.532398
59116124	0.532398
12358445	0.532398
7035901	0.532398
5901	0.532398
513034	0.5327
493439	0.532916
57368268	0.533111
14209054	0.533155
6482479	0.533155
97107236	0.533155
92978664	0.533155
452892	0.533803
3035491	0.533873
45039906	0.533873
93977460	0.533873
10615718	0.534587
12939904	0.534587
44316328	0.534604
500902	0.534604
92845515	0.534604
59844438	0.534604
13871033	0.534604
13871035	0.534604
60122232	0.534604
23519658	0.534735
97467	0.534756
277139	0.534756
92238006	0.534756
510972	0.535045
13566112	0.535482
54021277	0.535669
11010214	0.535685
506146	0.535693
86592813	0.535811
453757	0.535955
451961	0.535977
5272660	0.536057
21069732	0.5364
100935581	0.536681
151772	0.536681
21157436	0.536804
138113809	0.537202
127258181	0.537202
93055319	0.537416
23190	0.537416
12769724	0.537416
44386188	0.537416
121011847	0.537582
137195841	0.537601
13830104	0.537704
512291	0.537786
510983	0.537863
124156	0.537863
10017261	0.537863
516066	0.538042
6102683	0.538136
92043551	0.538208
126969140	0.538208
71772549	0.538208
512708	0.538905
54558447	0.538933
49784134	0.539547
12777819	0.539668
93515751	0.539668
11447886	0.539679
6332463	0.540236
49784438	0.540456
165148	0.540847
167877	0.540847
121487065	0.540847
121597152	0.540906
92237642	0.540906
97188	0.540906
97300838	0.541055
12940782	0.541135
191831	0.541135
6482480	0.541135
354916	0.541149
5278280	0.541336
100416	0.541507
65561	0.541531
5271378	0.541531
129389389	0.542039
516079	0.54205
516084	0.54205
21824454	0.542142
11057044	0.542397
121013684	0.542397
90472731	0.54272
512590	0.543329
21765584	0.54345
5273527	0.543466
6509777	0.54357
9835398	0.543662
3011893	0.543662
9878094	0.543746
49784136	0.544128
71761524	0.544233
14071470	0.544712
71229475	0.544832
25182694	0.544984
123262984	0.545191
3007215	0.545321
451911	0.545326
65269	0.545326
54171947	0.545331
351993	0.545331
131878455	0.545644
136041721	0.545992
21157388	0.546004
89495556	0.546217
7059437	0.546217
121487515	0.546217
18323	0.546217
10377200	0.546217
11064619	0.546217
7059439	0.546217
101384428	0.546217
46780471	0.546217
45356795	0.546217
6029	0.546217
643973	0.546217
121487529	0.546217
451603	0.546241
94842080	0.546241
57197621	0.546241
54669719	0.546241
21117608	0.546241
27556877	0.546241
688478	0.546241
352976	0.546241
151382	0.546241
101507	0.546241
121487114	0.546521
69906586	0.546586
91490554	0.546586
131849184	0.54659
21151277	0.546824
6708804	0.547067
1817	0.547067
92236674	0.547085
481528	0.547507
92245604	0.547587
13093729	0.547587
92245606	0.547587
136415743	0.547629
21732849	0.547691
92236455	0.54785
6474236	0.547854
133125648	0.547854
11130341	0.547946
21828013	0.548174
92249433	0.548944
10107793	0.548944
258592	0.549108
3007919	0.549425
137699672	0.549544
493223	0.549777
5278278	0.550155
10381436	0.550359
10015847	0.550573
513276	0.550741
155290824	0.551364
21121842	0.551933
67763123	0.552106
69886241	0.552106
13564810	0.552106
54336181	0.552267
21634250	0.552366
86592810	0.552416
154701266	0.552691
5273512	0.552919
21829242	0.553081
510948	0.553334
121486885	0.553457
21140569	0.553967
9824370	0.554309
53835662	0.55434
204132	0.554367
57377074	0.55446
4555041	0.554498
3010352	0.554583
511666	0.555091
6479393	0.555315
6475823	0.555504
131881305	0.555666
10859187	0.555768
13188940	0.555799
5272663	0.556302
139026027	0.556448
57369201	0.556448
3010797	0.556552
131708540	0.556554
70021591	0.556796
76973833	0.557036
511886	0.557164
14430355	0.557349
331904	0.557349
3011905	0.557786
96547	0.557906
6595777	0.557906
71407349	0.557914
15104857	0.557956
490310	0.558055
16076141	0.558427
282734	0.558464
22793986	0.558624
139592726	0.558912
137699081	0.558912
77844690	0.559212
124223956	0.559212
21140809	0.559234
15450939	0.559375
71539358	0.559553
45356917	0.559741
13066372	0.559741
9427	0.559741
1520351	0.559741
54669724	0.559741
13066370	0.559741
7059460	0.559741
450215	0.559741
101317	0.559741
44629859	0.559741
91872277	0.559741
44630766	0.559741
121486935	0.559758
14408979	0.559786
46780472	0.559832
90472260	0.559832
49849540	0.559832
15037959	0.55996
515217	0.559976
118855918	0.560077
124202892	0.560077
156587569	0.560128
6327750	0.560192
90674669	0.560234
640874	0.560509
13831580	0.560522
3010825	0.560722
44572473	0.560957
451874	0.561009
14185422	0.561009
54263300	0.56131
10355712	0.56131
129395379	0.561367
12803301	0.561367
12803302	0.561367
11121872	0.561505
176826	0.561577
456570	0.561617
156594560	0.561776
131848792	0.561886
94358774	0.561981
121010792	0.562025
133589974	0.562519
118855855	0.562524
11022827	0.562637
101343952	0.562693
510947	0.562917
5271296	0.562974
92286289	0.563025
512678	0.563288
13831293	0.563397
59783293	0.563434
40527693	0.563434
11821635	0.563434
96889965	0.563434
177273	0.563434
466420	0.563434
2305663	0.563434
905903	0.563434
11065470	0.563434
44240813	0.563434
13873708	0.563434
122619	0.563434
100253	0.563434
321729	0.563434
512718	0.563626
9881814	0.563892
23358719	0.563892
490684	0.56398
5272654	0.564042
21668257	0.564063
67853778	0.564254
11832095	0.564444
126567728	0.564502
501519	0.564614
135440057	0.564782
131888287	0.564828
11727150	0.565107
10778286	0.565565
76973510	0.566093
76973315	0.566093
11747043	0.566093
454531	0.5664
3008139	0.56642
446824	0.566458
4471889	0.566458
196709	0.566487
53463804	0.566487
17756793	0.56658
10878902	0.56658
46874484	0.56658
100016	0.56658
51380955	0.56658
92970665	0.567057
96622	0.567112
256040	0.567112
15839349	0.567112
86295119	0.567112
469074	0.567197
3007221	0.567527
92234642	0.567548
11725011	0.567748
71369906	0.567824
10266795	0.567828
156588427	0.568351
92279361	0.568432
639409	0.5685
148033	0.56891
5270727	0.569274
121221202	0.569503
451448	0.569558
162011	0.569558
452281	0.569627
20575885	0.569675
163320930	0.569819
136126104	0.570214
135409474	0.570214
15516021	0.570302
176869	0.57071
511885	0.570747
510979	0.571199
131885796	0.571227
21821194	0.571245
510982	0.571298
21820756	0.571718
92234054	0.571718
92237996	0.572159
14558097	0.572184
17756742	0.572386
15729467	0.572387
324452	0.572398
10065192	0.572681
92264741	0.572681
471865	0.572905
6531437	0.572905
93982631	0.573
3065118	0.57304
455182	0.573179
454533	0.573179
454534	0.573179
9570	0.573252
111261	0.573252
92223676	0.573252
23616817	0.573252
163947	0.573297
466039	0.573386
121486915	0.573413
11812423	0.573814
3080604	0.574461
604832	0.57513
14367013	0.575223
7282398	0.575223
118312477	0.575223
169704	0.575223
21824456	0.575223
7282400	0.575223
1265899	0.575223
452061	0.575307
14409039	0.575307
121486745	0.575427
126704	0.575432
469184	0.575432
131850520	0.575511
3010387	0.575604
50987538	0.575705
512719	0.575705
490433	0.575769
73478	0.575916
3010378	0.575968
92339825	0.575968
136592262	0.576309
24885222	0.576339
3010291	0.576393
512135	0.576637
92253117	0.576826
57358089	0.576826
92236430	0.57698
10467227	0.577082
14162719	0.577471
3081162	0.577471
162642336	0.577505
14730263	0.577559
135788877	0.578684
21821293	0.578808
69907861	0.578819
455180	0.578924
21145872	0.578924
10400774	0.578924
10445690	0.578924
14156718	0.578931
15119224	0.579078
129674064	0.579101
22880825	0.579155
481527	0.579228
156594202	0.579253
3011900	0.579406
9885936	0.579743
355033	0.579874
21826754	0.579908
92252368	0.579908
117647970	0.579938
53759423	0.579974
11849876	0.580019
134715452	0.580076
14310518	0.580106
14498611	0.580106
500903	0.580194
13830457	0.580194
137705912	0.580194
54180064	0.580334
23519662	0.580444
10849717	0.580479
278758	0.580524
21677555	0.580593
5273506	0.580701
59504000	0.580855
59504127	0.580855
59504108	0.580855
58463530	0.580894
6479205	0.581269
121486746	0.581271
452081	0.581448
163320836	0.581473
14102245	0.581473
54703164	0.581542
92299334	0.581542
54677885	0.581542
121487026	0.581641
5271786	0.581723
13712878	0.581732
478561	0.582059
92132205	0.582267
124428631	0.582267
27191376	0.582267
29982343	0.582267
107502	0.582267
45039580	0.582267
492409	0.582838
6334060	0.582891
10106801	0.582977
71346314	0.582977
45484443	0.583128
126567807	0.583669
92143143	0.583772
492408	0.583842
3082596	0.58423
18604151	0.584303
131884916	0.584417
10490949	0.584555
10705876	0.584555
95121	0.584574
23238948	0.584718
6334197	0.584921
131884919	0.585089
44438827	0.585223
196459	0.585345
5273015	0.585345
387072	0.585347
189148	0.585509
150619	0.585544
266482	0.585674
163285434	0.585693
22880806	0.585759
131843075	0.586422
21140290	0.586803
53792010	0.586934
21769885	0.586936
15172905	0.586974
57324057	0.587045
96851	0.587045
15172876	0.587247
92234638	0.587284
21139659	0.587284
46875748	0.58739
14978	0.58739
3007220	0.58739
92209900	0.58739
135519069	0.58763
135704021	0.58763
121487517	0.587695
135427250	0.588087
53775732	0.588259
3007909	0.588377
124565863	0.588401
58451159	0.588401
135405922	0.588504
135455558	0.588818
135459781	0.588818
481518	0.588895
14541163	0.588962
452054	0.588962
452051	0.588962
511984	0.589329
3010383	0.589378
15104850	0.589484
10977550	0.589739
44355029	0.590234
137176604	0.590373
57105083	0.590388
139025303	0.59068
46781591	0.59068
10563947	0.590707
126961829	0.590762
3010384	0.591248
92246004	0.591248
510946	0.591334
11173202	0.591449
56987376	0.591452
512137	0.591497
451365	0.591517
14308796	0.591517
122088	0.591517
21140410	0.591756
137795695	0.59211
132283239	0.59211
25185460	0.59211
129317616	0.59211
135600340	0.592174
136663945	0.592174
502244	0.5922
3006926	0.592533
91809617	0.592673
102339225	0.592879
137937484	0.593059
14061175	0.593059
5270589	0.593185
97297	0.593208
45039587	0.593208
25880707	0.593208
6419781	0.593208
5273750	0.593289
492407	0.5937
506144	0.593854
453994	0.593854
355900	0.593854
135625267	0.593868
7116198	0.593918
6561296	0.593918
7075199	0.593918
453689	0.594017
71374940	0.594082
14367015	0.594237
14367014	0.594237
11043123	0.594274
46876980	0.594274
464378	0.594342
510998	0.594539
6481831	0.595078
97454	0.595417
16747775	0.595593
10778285	0.596174
132073959	0.596174
89998825	0.596174
455669	0.596255
490432	0.596447
121487082	0.596507
121487083	0.596507
92268298	0.596715
92228261	0.596741
44451143	0.596741
97235	0.596809
92244157	0.596809
10833407	0.596942
97199	0.596945
512131	0.596945
446940	0.597008
5272744	0.597176
447069	0.597233
3011904	0.59728
71487589	0.597412
136250325	0.597663
71371890	0.597666
131844007	0.597773
98911	0.597775
135959544	0.59794
131875799	0.598185
688364	0.598313
111081	0.598313
482510	0.598344
129893514	0.598551
121486926	0.598819
470797	0.599103
391259	0.599103
10848780	0.599106
72195	0.599214
22027846	0.599214
510970	0.599264
501518	0.599388
512706	0.599492
22899187	0.59992
135771870	0.600033
11779374	0.600045
21140827	0.600356
91926387	0.600552
14999717	0.600615
92249436	0.600703
15613706	0.600703
9878327	0.600963
5272743	0.601232
131883949	0.60125
131858038	0.60125
92266557	0.60125
228966	0.601371
124301793	0.601371
13108042	0.60151
5272210	0.601513
25030767	0.601531
72182	0.601589
446658	0.60162
59180612	0.60178
76974600	0.601851
136236455	0.601976
71539360	0.602161
14409040	0.602282
130209	0.602684
472633	0.60287
122130429	0.603067
15119214	0.603232
10612861	0.603276
189108	0.603309
162660830	0.603362
6560416	0.60337
490438	0.603376
91483617	0.603958
57173805	0.604154
146674828	0.604424
44567065	0.60457
121487118	0.604814
54683691	0.604834
124526965	0.604888
57453626	0.604888
118703664	0.604888
58455422	0.604888
11311503	0.604888
118703665	0.604888
146014346	0.604888
122220071	0.604964
129437559	0.604978
22880800	0.605044
478563	0.605053
470030	0.605126
483941	0.605221
5287841	0.605318
21787858	0.605349
3005951	0.605395
482632	0.605528
466400	0.605591
3010388	0.605657
46875339	0.605657
92246571	0.605657
134229912	0.605898
135848702	0.606046
123993511	0.606085
137628662	0.606204
512136	0.606282
447192	0.606305
98575509	0.606827
40493564	0.606827
453168	0.606843
139267848	0.606918
139591931	0.606918
139267847	0.606918
139267828	0.606918
135692739	0.607061
14162717	0.607336
147839	0.607336
3032355	0.607391
3000603	0.607391
10334791	0.607469
71732376	0.607817
135410340	0.608033
135740163	0.608033
135453973	0.608033
150621	0.608076
11832583	0.608153
3037046	0.608319
3002879	0.60839
67228673	0.608412
22723869	0.608412
171555	0.60849
54531450	0.608525
23112639	0.608525
53678903	0.608677
513206	0.608944
137221145	0.609097
136842926	0.609097
144823459	0.609234
10778362	0.609286
11196409	0.609302
356796	0.609385
92236585	0.609438
261450	0.609438
92236583	0.609438
459890	0.609438
152488	0.610042
324745	0.610325
73662	0.610589
72200	0.610589
7204908	0.610589
44629931	0.610589
3010385	0.610653
3007126	0.610657
25231310	0.610721
10753744	0.610782
131882742	0.611187
495012	0.611196
11004885	0.611239
15742006	0.611264
369086	0.611305
131072	0.611305
10469019	0.611327
66906535	0.611433
845540	0.611508
11697484	0.611639
10400520	0.611892
21854430	0.612155
506145	0.61218
12799571	0.612192
98801	0.612197
92230795	0.612262
18661221	0.612262
69454489	0.612267
71744251	0.612267
11390847	0.612493
10264872	0.612516
53243689	0.612643
126968805	0.612759
139024751	0.612759
251784	0.612759
25728863	0.612759
7272023	0.612759
11276944	0.612759
118026092	0.612774
86306492	0.612802
71371189	0.612883
124428635	0.613031
92918	0.613031
97000	0.613031
7282382	0.613031
14135553	0.613031
490445	0.613169
102461643	0.613271
118294346	0.613329
500026	0.613489
101947567	0.613525
21677361	0.614121
452095	0.614156
14430353	0.614156
22875362	0.614172
21852786	0.614366
11507479	0.61453
3034423	0.61453
6595185	0.61453
676166	0.61453
512674	0.614611
135509485	0.614719
135511868	0.614719
136257804	0.614719
136843263	0.614719
137090331	0.614719
54256130	0.614912
513870	0.615264
6708818	0.615462
688121	0.615462
490037	0.615462
6256	0.615462
150628	0.615558
92231363	0.61598
29921448	0.61598
15612863	0.616119
136896502	0.616465
135453913	0.616465
10107866	0.616502
512604	0.616512
21817403	0.616538
92252780	0.616751
97692	0.616751
67113473	0.616985
21121840	0.617069
134004	0.617069
54339089	0.617154
355902	0.617259
453997	0.617259
9900206	0.617523
268421	0.618048
92245911	0.618048
97304120	0.618163
136674916	0.618339
117940991	0.618355
131881293	0.618478
110158190	0.618558
135600345	0.618814
21125843	0.618853
10491412	0.619065
117590597	0.619176
137699191	0.619191
138058736	0.619191
146160048	0.619191
137699364	0.619199
5272754	0.619561
15289165	0.619571
10107217	0.61965
11825687	0.619706
135410347	0.619711
135398550	0.619815
131885345	0.620264
451912	0.620381
121487449	0.621253
22880824	0.621511
11358266	0.621717
135463451	0.621737
131884920	0.621828
124345	0.621841
92286287	0.621841
121486830	0.621959
188276	0.622146
21769737	0.622202
98625	0.622209
44366461	0.622391
515085	0.622525
155905558	0.622637
134520771	0.622873
131850900	0.623305
155905580	0.623362
188350	0.623371
3012549	0.623787
2999329	0.623811
71435310	0.623834
54297338	0.623917
125734	0.623917
121487030	0.624051
133609839	0.624286
502242	0.624323
13989304	0.624453
131852043	0.624459
6481236	0.62453
57453628	0.62453
124223848	0.62453
44451208	0.624679
92229576	0.624679
136030678	0.624823
150669	0.624866
29921449	0.624972
512869	0.625023
92264349	0.625023
131858703	0.625285
5271015	0.625322
131881064	0.625392
92247204	0.625392
125503985	0.625403
512130	0.625489
102601363	0.625597
121216248	0.625634
121698	0.62568
13052734	0.62568
6713638	0.625927
4127885	0.625927
21677217	0.625927
73514	0.625927
92236327	0.625927
512707	0.626029
489849	0.626151
10063737	0.626724
9921551	0.626788
451890	0.626788
65102	0.626813
58834006	0.626813
21820463	0.626813
12800105	0.626813
135435173	0.626835
211875	0.626852
136195916	0.627129
121486862	0.627257
135422917	0.627539
15953881	0.627744
451915	0.627744
135616711	0.627921
101784714	0.627948
10782439	0.627972
13993514	0.627979
10198304	0.627979
135538642	0.628053
136076706	0.628053
135532713	0.628053
135538671	0.628053
135434940	0.628053
135415565	0.628053
135800807	0.628053
136854232	0.628053
135433837	0.628053
137274215	0.628053
136236459	0.628225
73651	0.62832
44308741	0.62832
490435	0.62832
137128749	0.628376
10611197	0.628552
14843513	0.62861
455179	0.628625
454528	0.628625
454530	0.628625
373953	0.628681
121228750	0.628902
102381563	0.628984
22885207	0.629092
10611929	0.62922
12358319	0.629241
512657	0.629299
71313037	0.6293
71776184	0.6293
121486927	0.629773
11032861	0.629774
13566115	0.629787
22880803	0.629833
73345328	0.629955
44146603	0.62997
46926326	0.630233
70385614	0.630327
267808	0.630699
14682078	0.630699
66649608	0.630834
21769748	0.630887
23629091	0.63093
13872084	0.631086
92237723	0.631113
21627890	0.631113
471486	0.631124
511669	0.63114
121487049	0.63114
490630	0.631262
58761796	0.631276
122707085	0.631601
297594	0.631601
451856	0.631616
14430362	0.631633
452096	0.631633
11065406	0.631648
92233963	0.631648
12137955	0.631648
3007920	0.631746
124715	0.631746
3006222	0.631746
121217034	0.631767
121487456	0.631844
15934097	0.631978
21829540	0.632041
135443731	0.632047
131884619	0.63217
125494152	0.632215
125494151	0.632215
135483941	0.632252
135483976	0.632252
139086336	0.632507
94725030	0.632767
92131953	0.632767
9816781	0.632767
92233339	0.632767
266234	0.632767
12800104	0.632767
58834035	0.632767
57061669	0.632767
94725032	0.632767
447594	0.632767
11032790	0.632767
84392	0.632767
3035929	0.632767
14191021	0.632913
135771852	0.633176
101339887	0.6332
102531168	0.6332
59504008	0.633282
59504149	0.633282
59504120	0.633282
21854120	0.63329
71337875	0.633439
71352385	0.633439
59252566	0.633798
131700647	0.633804
639614	0.633804
13941609	0.633819
128656	0.633823
92221238	0.633828
92221236	0.633828
134693227	0.633828
13870936	0.633869
6566064	0.633921
97480	0.633921
7099911	0.633921
18881	0.633921
23617998	0.633921
92161858	0.633952
271276	0.633952
24820718	0.633974
13188936	0.63409
171798	0.634116
150625	0.634191
92233380	0.634333
131881445	0.634333
136795196	0.63442
136670059	0.63442
451960	0.634438
121487106	0.634569
129787857	0.63459
456327	0.634747
461854	0.634747
456648	0.634747
146674673	0.634872
3006944	0.634971
493453	0.635011
131853290	0.635032
135921348	0.635075
121217041	0.635114
54343230	0.635367
131884262	0.635511
58078371	0.635708
121487074	0.636039
56961027	0.636129
3011894	0.636236
131880513	0.636321
90356982	0.63636
452090	0.636398
509522	0.636398
121486893	0.636427
11776820	0.636441
10041129	0.636884
5273013	0.637
29982346	0.637027
45039581	0.637027
11697766	0.637027
45052066	0.637029
156594694	0.637029
512705	0.637202
129561	0.637249
9813298	0.63725
10610233	0.637298
454870	0.63731
330407	0.637327
131881789	0.637327
5270525	0.63733
67566518	0.637707
11622526	0.637718
234984	0.637776
191626	0.637785
10357262	0.637845
21855714	0.637939
145681	0.637996
501517	0.638131
482589	0.638329
10019708	0.638331
92229125	0.638338
44451061	0.638338
167798	0.638368
56851256	0.638511
11097661	0.63853
296237	0.638751
155905982	0.638765
93982611	0.638871
135415644	0.639112
451554	0.639128
122174083	0.639152
45052344	0.639264
42637091	0.639534
495537	0.639686
44563542	0.63979
21627889	0.63993
122129480	0.639973
10105820	0.639986
163320923	0.640021
131851102	0.640046
135696522	0.640089
136045770	0.640089
135403914	0.640089
135812388	0.640089
135434786	0.640101
102063598	0.640205
71340337	0.640309
451616	0.640309
92209628	0.640318
7088272	0.640318
97577	0.640318
152521	0.640412
155903793	0.640601
3000303	0.640696
3000242	0.640696
595375	0.640715
90673985	0.640722
40506074	0.640796
3000824	0.640796
277822	0.640796
512178	0.640834
356732	0.640938
167321	0.640938
22211279	0.64118
124430633	0.641223
124430634	0.641223
54176875	0.641225
135504147	0.641252
175972	0.641254
15289164	0.641406
72212336	0.641406
11807674	0.641443
70889269	0.641607
644174	0.641607
6560357	0.641607
21704	0.641607
638036	0.641607
10890867	0.641607
5702004	0.641607
6420052	0.641607
447916	0.641607
121486812	0.641607
12358320	0.641607
12358321	0.641607
12358325	0.641607
453548	0.641607
448378	0.641607
53384930	0.641607
54732806	0.641607
7040251	0.641607
23279550	0.641607
139025871	0.641607
12358322	0.641607
160739	0.641607
191	0.641607
122130566	0.64176
54432316	0.641895
3034648	0.641897
3034638	0.641897
10923602	0.641925
10492175	0.641925
71442564	0.641925
11311566	0.642055
452612	0.642085
126283	0.642094
459903	0.642094
135410302	0.642122
20832934	0.642213
14464884	0.642271
259345	0.642613
511763	0.642661
51414401	0.642773
146108	0.642773
13831291	0.642773
22884229	0.642779
15955633	0.642795
121219141	0.642795
71342993	0.642804
71354368	0.642804
15410715	0.643234
11346304	0.643254
21580289	0.643392
11666177	0.643415
135465599	0.64344
135627705	0.64344
136062166	0.64344
135933068	0.64344
135622951	0.64344
136826947	0.64344
136065188	0.64344
54518623	0.643476
2729604	0.64351
94196	0.64351
7059462	0.64351
7195995	0.64351
68206315	0.64351
1263225	0.64351
27661670	0.64351
9992804	0.643614
6536767	0.643832
5273934	0.643832
21854434	0.643836
161583	0.643901
125654	0.64414
93258	0.64414
9992648	0.644284
7269451	0.644284
13887579	0.644284
107643	0.644284
92132277	0.644284
21825596	0.64431
87825371	0.64441
90663906	0.644423
512134	0.644642
92264929	0.644642
333596	0.644642
98581	0.644721
481523	0.644795
3005947	0.644821
3006523	0.644855
3006522	0.644855
21139907	0.64503
13833767	0.64503
259853	0.64503
121487089	0.64509
21456083	0.645467
3005950	0.645467
3358362	0.645763
44432644	0.645763
10377839	0.645784
197020	0.645784
76282776	0.645815
[truncated: 5,262 more rows]

## Sheet: 2. P. gingivalis
cid	Probability of Antimicrobial
483939	0.994999
130583	0.988032
449392	0.985219
3392033	0.985219
472167	0.98105
446725	0.977844
71440751	0.976652
121487093	0.972585
512675	0.972574
54089955	0.970971
135496375	0.970492
126968625	0.970062
57369656	0.970062
23421206	0.970062
92252177	0.967924
15160075	0.967162
512130	0.966687
5279534	0.966101
135743938	0.965942
483927	0.964758
22787949	0.964677
454121	0.963721
22841776	0.963336
6475886	0.962984
57369657	0.962661
101543	0.962661
515211	0.962085
121217776	0.961854
483922	0.961361
44560559	0.960628
483938	0.95946
18655749	0.959274
3005547	0.958851
483943	0.958534
1210964	0.957722
121217563	0.95764
101643824	0.957596
135921348	0.957488
54531183	0.956481
10125531	0.956481
124561689	0.956481
5273982	0.954639
5487206	0.953793
6440103	0.953019
453994	0.952472
355900	0.952472
515210	0.952436
121015029	0.951958
121006411	0.950794
22209968	0.950371
494218	0.950371
54192124	0.950082
6454537	0.950082
542606	0.949902
135483717	0.948953
135457959	0.948953
481528	0.948783
512633	0.948519
6479140	0.94825
7098661	0.947861
53774252	0.947773
6475885	0.947746
483934	0.947338
483941	0.946994
91926387	0.946847
10638005	0.946308
250899	0.945895
5274161	0.945722
5279532	0.944874
11580280	0.944729
137214373	0.944386
87208407	0.944253
6450917	0.944191
511377	0.943302
90673699	0.943199
72212336	0.943076
15289164	0.943076
3005551	0.943017
6992262	0.942998
483935	0.942552
54432316	0.942006
71371593	0.941822
66608846	0.941695
135439474	0.94085
3012549	0.940564
21852789	0.940486
355902	0.938971
453997	0.938971
121487327	0.938706
3012551	0.938044
511378	0.936648
6475798	0.936257
121487019	0.934543
90663906	0.934308
121487090	0.933574
137090731	0.933295
135538693	0.933242
134715452	0.933023
66535	0.932773
12308857	0.932773
57047691	0.932773
135625316	0.932739
3065118	0.932296
483937	0.931901
473280	0.931865
121486916	0.931765
512676	0.931711
6438459	0.931428
6450981	0.931428
135771870	0.931024
5279533	0.93039
512139	0.930273
44421198	0.930268
6479144	0.93024
6479145	0.93024
15509509	0.930086
135398701	0.929643
512727	0.929272
12994351	0.928004
135509071	0.927963
13989306	0.92718
575855	0.92718
512325	0.926532
516053	0.926398
512330	0.926342
473281	0.926318
3012564	0.926211
5271262	0.92607
136921547	0.925669
101926865	0.925134
133332	0.925133
20839332	0.925133
6439549	0.925133
3006522	0.924894
3006523	0.924894
512323	0.923854
6475928	0.923615
88146187	0.923615
136238399	0.923291
135511145	0.922851
455227	0.922772
483929	0.922763
20849148	0.922498
121487089	0.921901
6482246	0.921883
14376122	0.921499
71775556	0.921293
136025255	0.92117
483926	0.920931
391363	0.920903
477849	0.920903
490390	0.920567
483947	0.920325
492555	0.91997
135449322	0.919331
6479139	0.918064
129874	0.917149
131864317	0.916919
131886803	0.916558
90663555	0.916558
135462526	0.916294
44560429	0.916266
515212	0.916083
100222	0.915928
3009783	0.91591
136353600	0.91475
472173	0.914741
102602182	0.914484
483946	0.914391
494763	0.913602
3065115	0.913434
5270713	0.912772
470053	0.912685
483931	0.912569
121487874	0.912559
5270780	0.911967
121487118	0.911757
90470199	0.911734
466385	0.911631
90663546	0.911499
131886804	0.911499
6450927	0.911364
512673	0.910855
53909207	0.910855
135398596	0.910687
136259535	0.910687
136100249	0.910405
483923	0.910138
444920	0.909534
511014	0.909423
15928623	0.909064
12009657	0.9089
15868081	0.908034
511015	0.907954
121487519	0.907917
515111	0.907668
136041721	0.907606
6478357	0.90745
10978511	0.906855
455180	0.906845
10400774	0.906845
10445690	0.906845
21145872	0.906845
21788887	0.906702
6481577	0.906137
12067880	0.906131
121487459	0.906022
138375993	0.905688
492557	0.905587
455179	0.905294
454530	0.905294
454528	0.905294
473083	0.904859
514820	0.904858
121487537	0.904751
483945	0.904415
488244	0.90425
3012550	0.90407
102505730	0.903557
121486842	0.903411
3002126	0.903141
121487017	0.903101
24823119	0.9027
3067878	0.902597
54010782	0.902502
155889176	0.902487
135556930	0.902487
131858703	0.902143
136236455	0.901849
5273979	0.901724
196324	0.901435
10850176	0.90118
135538728	0.900982
483932	0.900707
10380149	0.900683
5274212	0.900668
13375937	0.900526
451882	0.900103
12787947	0.899895
6475332	0.899706
15928607	0.899406
512669	0.899029
6450926	0.899029
9838550	0.898933
6479900	0.89865
6475205	0.89865
469866	0.898416
15276822	0.898248
483924	0.897894
150624	0.897218
483936	0.897156
135405252	0.897066
136734671	0.897014
135412808	0.896879
11162398	0.896393
135616719	0.895941
454983	0.895312
6479133	0.895204
101245382	0.894879
135596626	0.894071
3006931	0.893718
15104850	0.893625
122631	0.893597
6483433	0.892924
481524	0.892798
6481582	0.892746
13566112	0.892543
3011931	0.892529
135398639	0.892432
18637700	0.892053
512329	0.891791
481519	0.891776
135422917	0.891415
376367	0.891221
515215	0.891011
136260091	0.890648
136682650	0.890648
69527463	0.890621
470800	0.890618
483942	0.890155
12009658	0.89012
135956774	0.889667
135446908	0.889346
510969	0.889128
135511063	0.888828
5273975	0.888506
44378767	0.888116
10067373	0.888113
481520	0.887951
121487870	0.887934
12810881	0.887919
129318779	0.88767
3065123	0.887455
92132405	0.887426
11778706	0.887426
69626224	0.887426
152475	0.886462
3080864	0.886384
23545530	0.88636
71621663	0.886332
136879425	0.886134
136242431	0.886097
3007223	0.886093
15954533	0.885707
5273977	0.885603
15954525	0.885285
92148590	0.885285
54235934	0.884662
136238397	0.884475
469095	0.884219
514817	0.884123
71371786	0.883731
174519	0.883731
10517505	0.883713
197610	0.883713
13941609	0.883556
135483941	0.883533
135483976	0.883533
454120	0.883504
135743990	0.883387
47002148	0.882681
136272490	0.882553
10466898	0.882499
135583322	0.882326
136226316	0.881982
128650	0.881982
178714	0.881982
469867	0.881925
365914	0.881925
163320932	0.881843
135420436	0.881843
496474	0.881821
391266	0.881821
451841	0.881242
451834	0.881242
2783869	0.881242
10849690	0.880776
57246734	0.880776
54446036	0.880239
150623	0.880193
73312146	0.880181
9994258	0.880136
6712985	0.880136
135743936	0.880039
139025680	0.879694
10389132	0.879694
15956150	0.879667
160418	0.879617
470797	0.87944
391259	0.87944
6481834	0.879201
121487869	0.878526
135441726	0.878369
5273980	0.878283
131853148	0.877719
13963301	0.877485
469771	0.877405
14411349	0.877405
191942	0.877221
481521	0.876686
44372621	0.876362
44421147	0.876362
136217926	0.876166
50989994	0.875121
3061100	0.875121
137287473	0.87449
5274169	0.874116
515083	0.873642
472166	0.873476
6475206	0.873476
6479898	0.873476
10378968	0.87344
470199	0.873202
135596618	0.872644
135764626	0.872331
13205980	0.872256
124396689	0.872256
53794255	0.872256
13205979	0.872256
483930	0.872143
135412763	0.871696
131693	0.871296
71761460	0.87126
5272908	0.871102
131884633	0.870848
21824451	0.870788
455217	0.870453
12799571	0.870431
12097726	0.870232
136272494	0.869953
135616717	0.869131
135926583	0.869131
469868	0.869053
365913	0.869053
54336181	0.868885
385457	0.868743
135823809	0.868689
512320	0.868607
196433	0.868233
135625266	0.868114
21677555	0.867983
494651	0.867839
363533	0.867839
352589	0.86751
3035986	0.867125
469869	0.866842
129126	0.866731
456203	0.866696
453081	0.865662
6479899	0.865645
470049	0.865587
465094	0.865587
7264506	0.865066
23421209	0.865066
479691	0.865031
15289165	0.865
5279530	0.864774
53657227	0.864515
512668	0.864263
6450920	0.864263
12097724	0.864068
102002581	0.863789
506146	0.863447
11346228	0.863225
10833407	0.86312
22881724	0.862592
139025758	0.862591
273749	0.862537
131875668	0.862537
5272658	0.862464
10730026	0.862415
10198943	0.862378
6479335	0.862326
196471	0.86224
153548	0.862069
131881293	0.861977
13989335	0.861931
13989334	0.861931
449489	0.861716
53940462	0.861163
6454581	0.860991
121217180	0.860717
3065117	0.860652
136768581	0.860478
131876403	0.860209
270261	0.860209
453631	0.859582
5272663	0.859315
135410347	0.859053
10332009	0.858789
21853094	0.85859
135778987	0.85794
135435172	0.85794
135753280	0.85794
135764690	0.85794
456109	0.857727
135517354	0.857445
154730315	0.856919
136161656	0.856175
131878839	0.856089
57354933	0.856089
136108872	0.856081
92231367	0.85558
18661222	0.85558
136387048	0.855224
3012258	0.855139
154726303	0.854724
22824722	0.854508
72736985	0.854046
22848660	0.853966
71761487	0.853635
136065590	0.853491
135437126	0.853491
9900206	0.853051
492556	0.852525
136020842	0.852262
91809617	0.85204
135457441	0.851988
151840	0.85182
11140051	0.851576
12097725	0.851527
121486746	0.850889
483933	0.850469
93036	0.850427
481527	0.850378
136592262	0.850354
135398630	0.850216
10021283	0.850143
46242340	0.849931
15590161	0.849912
10716626	0.849722
511984	0.84954
5273008	0.848851
53699095	0.848686
92246571	0.848442
3010388	0.848442
46875339	0.848442
121487298	0.848261
15788526	0.847854
42553078	0.847617
42553079	0.847617
136842757	0.847594
99692	0.847546
90487625	0.847385
494096	0.847278
92236670	0.847278
137191441	0.84724
195200	0.846979
160130	0.846954
469447	0.846826
15087558	0.846621
21140275	0.846559
3012563	0.846554
14258187	0.846542
3036202	0.846394
470796	0.846382
483921	0.84617
492200	0.846105
68768358	0.845784
126970070	0.845784
13989307	0.845434
515214	0.845236
72261	0.844709
5274367	0.844671
145710203	0.844228
5287614	0.844174
511016	0.843881
137202792	0.843852
9795471	0.843585
193091	0.842952
6505368	0.842737
134220	0.842737
6439649	0.842737
3011932	0.842727
121487428	0.842497
188216	0.842359
13871386	0.842128
136251916	0.842061
10685594	0.841895
6334737	0.841521
455411	0.841513
488237	0.84142
136236477	0.841383
54556091	0.841184
16721025	0.840919
56608890	0.840649
121011373	0.84063
9950702	0.840478
5278278	0.840469
16728337	0.840357
139026052	0.840351
135449281	0.840277
10399334	0.840241
10086464	0.840104
135625267	0.839858
72201	0.839715
14485380	0.839715
481518	0.839128
13940600	0.838913
121487889	0.838654
135538729	0.838569
10764891	0.838527
330549	0.838492
198689	0.838492
512136	0.838449
136434268	0.838393
512324	0.838346
135464489	0.838146
136134225	0.837983
136847919	0.837983
135398727	0.837983
121487283	0.837718
67327211	0.837528
54377788	0.837412
121218308	0.837067
5273973	0.836767
6334181	0.836657
192597	0.836526
136236459	0.835842
6858194	0.835612
135398597	0.835517
135596592	0.835517
66686600	0.835375
3011933	0.835265
475573	0.835127
14826108	0.834751
66931238	0.834597
136250325	0.833827
512678	0.833733
10659906	0.833629
90470680	0.833335
92233230	0.832771
54136175	0.832771
86592810	0.832745
167350	0.832546
18469116	0.832421
22094552	0.832421
3037732	0.832157
10333430	0.832078
506142	0.832032
151864	0.832032
107769	0.831879
14310518	0.831598
71420849	0.831577
169295	0.831511
5287615	0.831225
188575	0.830407
196507	0.830368
71621351	0.830245
6481833	0.830234
15957676	0.829917
512137	0.829684
3012255	0.829306
152162	0.829221
24776418	0.829002
54276168	0.828715
3012257	0.828472
140344780	0.828442
135771852	0.828308
121219148	0.82828
135400896	0.828125
3037127	0.828034
3010410	0.827618
16755631	0.827056
136157781	0.826925
135398593	0.826925
136069427	0.826925
135623679	0.826925
161605	0.826454
139025682	0.826392
131850900	0.826317
135427250	0.826297
191808	0.826296
121487464	0.825838
12193788	0.825838
53791036	0.8256
503109	0.825574
10612861	0.825126
121487492	0.824976
3005550	0.824818
6478372	0.824444
498022	0.824354
65148	0.8243
92245928	0.8243
73351959	0.824261
131871944	0.823927
121006824	0.823833
5279529	0.82376
11197465	0.823573
135740163	0.823527
135453973	0.823527
135410340	0.823527
135416123	0.822895
135538744	0.822866
136248812	0.821938
57105083	0.821784
59628352	0.821739
21140410	0.821264
10902616	0.820834
136229440	0.820333
5271699	0.820154
14826116	0.820024
135991622	0.819781
5273017	0.819484
6320191	0.819484
22791353	0.819289
9973143	0.819256
135849775	0.819041
135602240	0.819041
54561889	0.818978
453996	0.818944
92279160	0.818944
470030	0.818263
13831580	0.818258
76973301	0.818163
135538691	0.818074
3081517	0.817229
174373	0.816964
512128	0.816795
10684201	0.816627
131865335	0.816466
4304654	0.816415
494929	0.816415
511856	0.815151
511854	0.815151
6476965	0.815021
9841193	0.815021
45105016	0.814797
499786	0.814706
496020	0.814525
53653696	0.814161
5271821	0.813428
129864	0.813197
181830	0.813167
23519663	0.813039
10317833	0.812923
133121258	0.812923
126969944	0.812923
481523	0.81265
5272657	0.812632
318920	0.812571
137036988	0.812098
29921449	0.81193
3037684	0.811886
135541390	0.811846
118796809	0.811749
8642	0.811581
449405	0.811581
92241033	0.811507
15118691	0.811507
71761524	0.811392
136821128	0.811223
135920662	0.811223
135445750	0.811223
135897000	0.811223
137108250	0.811223
135897124	0.811223
3087115	0.811028
71317045	0.811018
477850	0.81092
121487353	0.810868
13051253	0.810868
3005964	0.810735
3036899	0.810668
126797	0.810564
54347690	0.810564
135412715	0.81042
162653200	0.810405
9996041	0.809904
258357	0.809747
131878904	0.809747
14862149	0.809593
139086336	0.809555
135600345	0.809459
471524	0.809348
6327750	0.809231
10092318	0.809102
65375	0.808666
5274292	0.808594
6435302	0.808531
512299	0.808531
6479191	0.808531
68012606	0.808459
490626	0.808448
3007912	0.808296
13922189	0.808216
13922191	0.808216
9871558	0.808216
92977577	0.808216
29978508	0.808216
117810735	0.808216
135482571	0.807621
136250551	0.807054
13566115	0.806685
5273014	0.806568
122130386	0.806508
137072542	0.806491
9840777	0.806191
14326905	0.806191
136190394	0.806143
11749237	0.806108
293725	0.806068
25075887	0.806068
92924	0.806037
125494351	0.806012
53759423	0.805941
10849479	0.805722
452445	0.805691
9881814	0.805592
23358719	0.805592
73478	0.805526
512717	0.805008
92264741	0.80498
10065192	0.80498
14826943	0.804956
5271958	0.804863
21677361	0.804801
24822457	0.8047
135596630	0.804632
137092996	0.804237
454132	0.803989
492034	0.803918
96547	0.803904
6595777	0.803904
511990	0.803791
135462273	0.803735
136791445	0.803606
24822456	0.803332
135443291	0.803301
9992803	0.803176
466039	0.802998
14776494	0.802896
22057571	0.802867
15689273	0.802867
125925	0.802867
506145	0.802842
452498	0.80247
21668257	0.802469
6398342	0.802195
483944	0.802125
6913097	0.80211
135692739	0.802109
135398640	0.801774
139025114	0.8016
131886802	0.801472
121007157	0.801472
136058528	0.801241
135849776	0.801155
156594560	0.800992
10037425	0.800961
125924	0.800961
146066	0.800501
53965369	0.800501
13205977	0.800252
53642991	0.800252
10467227	0.800167
135554439	0.799705
462380	0.799486
481517	0.799156
15124187	0.798961
124442842	0.798645
124442843	0.798645
21123822	0.798447
136265295	0.798156
135485495	0.798119
46846349	0.798027
10826879	0.797979
21853097	0.797838
136663945	0.79783
135600340	0.79783
3010386	0.797143
137198969	0.797077
10446782	0.796802
135783067	0.796567
162367444	0.796377
92243788	0.796235
121487333	0.796235
46780426	0.795846
133688245	0.795846
154809499	0.795663
3012256	0.795574
21140838	0.795523
510142	0.795402
10848780	0.794888
123789960	0.794817
3065116	0.794768
6479138	0.794717
511994	0.794717
6479137	0.794717
135492361	0.794658
136795137	0.794658
133395	0.794636
6439557	0.794636
10265594	0.794636
3009784	0.794599
514814	0.79423
10754975	0.793936
92242775	0.793733
3006169	0.793733
57351337	0.793646
121486980	0.793614
3012254	0.793287
3083166	0.792943
23724732	0.79294
92228821	0.79294
515103	0.792819
477548	0.792662
54112622	0.792556
124201	0.792523
53988721	0.792441
15991535	0.791905
9992804	0.791733
22880803	0.791675
125493863	0.791663
125493861	0.791663
137176536	0.791374
135602211	0.791374
254695	0.79105
3010383	0.791002
54109572	0.790782
21147181	0.790533
20279	0.790533
24867261	0.790533
135508096	0.790027
121487387	0.789602
455763	0.789378
136248813	0.789279
10893330	0.789011
54285617	0.788733
124296	0.788733
478559	0.788359
135511167	0.788173
135464488	0.788173
135404725	0.787991
71422332	0.78792
49779988	0.787675
90673692	0.787286
139025684	0.787238
146160877	0.787068
137239458	0.787068
10029973	0.786958
5272907	0.786727
139025107	0.786335
131852022	0.786226
136745025	0.786218
135406950	0.786218
136441961	0.786218
14630157	0.786205
92264929	0.786198
512134	0.786198
333596	0.786198
10266554	0.786189
135433627	0.786075
451837	0.785998
148744	0.785958
5274188	0.785846
163285680	0.78583
90176383	0.785627
15036533	0.785627
57097210	0.785627
46705350	0.785453
121427567	0.785453
3461	0.785453
11054511	0.785453
60750	0.785453
6093357	0.785453
13922196	0.785453
191599	0.785173
190030	0.785061
466018	0.785048
513122	0.784931
5894	0.784931
513124	0.784931
7045516	0.784931
515216	0.784848
54718171	0.784649
44829127	0.784597
5273750	0.784578
137179823	0.784219
121225517	0.784194
136643516	0.784188
146152	0.784087
512718	0.784071
10848525	0.784026
478563	0.783856
459895	0.783703
136240744	0.78365
3005552	0.783562
136020889	0.783498
11140845	0.783268
129350	0.783268
13989304	0.782917
149295	0.782788
6479135	0.782788
6440090	0.782788
158379	0.782588
454534	0.782353
454533	0.782353
455182	0.782353
9794951	0.782283
135407752	0.782168
7264507	0.781967
22803666	0.781967
94136	0.781967
71442569	0.781933
16133029	0.78177
5324587	0.781621
122130785	0.781581
89486751	0.781581
136260503	0.78152
5274208	0.781449
6478042	0.781306
152488	0.781293
172916	0.781254
163285627	0.781128
11278700	0.780845
131854439	0.780842
18658060	0.780819
9882903	0.780552
354624	0.780552
5274184	0.780311
5271259	0.779752
16219063	0.779634
68886	0.779634
44629987	0.779634
6603750	0.779634
688407	0.779634
446727	0.779634
6481583	0.779634
6921725	0.779634
3183	0.779634
5353599	0.779634
14581958	0.779354
14803227	0.779275
90674669	0.778911
480265	0.778777
131852023	0.778562
5272753	0.778435
10308414	0.778431
6450918	0.778082
135567131	0.777865
51571861	0.777633
25632117	0.777633
65050	0.777633
57113422	0.777633
135459382	0.77743
135616961	0.77743
136806576	0.77743
23391556	0.777335
100416	0.77731
9835200	0.777054
131853290	0.776919
15160057	0.776715
14367014	0.776361
14367015	0.776361
454925	0.776288
6481604	0.776285
89486753	0.776159
6602210	0.776125
483920	0.775862
147145	0.775842
71316819	0.775842
137274215	0.77581
135415565	0.77581
135434940	0.77581
135433837	0.77581
136854232	0.77581
136076706	0.77581
137100249	0.775698
121008681	0.775579
471523	0.775518
146503834	0.775382
4369196	0.775286
11369660	0.77525
10379132	0.775214
92230795	0.775055
18661221	0.775055
129735822	0.774511
136238394	0.774396
12081433	0.774116
10923198	0.773846
163285378	0.773805
6857539	0.773453
92271314	0.773453
10661693	0.773426
5270502	0.773426
54309519	0.773255
97184	0.773255
266223	0.773255
71352407	0.773219
3081042	0.773219
4269332	0.773167
3034646	0.773167
10849857	0.773157
481530	0.773024
135423946	0.772957
88101259	0.772752
171490	0.772462
121006761	0.772258
135459780	0.772255
456904	0.772174
5272752	0.772134
490630	0.771862
512674	0.77144
13188940	0.771122
3081471	0.770988
575859	0.770929
56612070	0.770748
515213	0.770505
21855041	0.770218
14159235	0.770165
72212335	0.770165
121487476	0.769829
127258203	0.769624
481522	0.769517
15276896	0.769315
150973	0.769113
138375991	0.769091
145710714	0.769045
512291	0.76897
56609687	0.768807
54683691	0.768743
121006713	0.768444
10106291	0.768333
3035490	0.768308
71351190	0.768252
5274366	0.768203
160598	0.768056
127259583	0.768018
57269864	0.767954
13477311	0.767954
71315467	0.767954
11579992	0.767954
473278	0.767954
5270525	0.767901
20646474	0.767787
330407	0.767708
131881789	0.767708
514803	0.767707
73479	0.7677
6482245	0.767657
54370573	0.767335
135405922	0.767297
163888	0.767273
22880806	0.767267
136257920	0.76723
5270727	0.76708
135403914	0.767014
135812388	0.767014
136045770	0.767014
135696522	0.767014
477551	0.766986
71404160	0.766832
136228650	0.766611
3012253	0.766597
452097	0.766593
14430375	0.766593
9951889	0.766399
516467	0.766381
5271959	0.765777
137128751	0.765734
54021318	0.765631
13871382	0.765631
124297	0.765332
58696770	0.765332
13647253	0.765332
50313	0.765332
656409	0.765332
121007158	0.765312
10492375	0.765228
5272906	0.765211
53962626	0.764953
125691	0.764476
14539818	0.764348
14331714	0.764339
71387182	0.764326
18658061	0.763901
53901126	0.76384
150625	0.763712
174657	0.763549
13566110	0.7634
174743	0.763306
10933976	0.763293
5289071	0.763277
136385771	0.763146
135434782	0.763116
86751121	0.763029
135618545	0.762518
137204795	0.762463
131883224	0.762443
446658	0.762126
135521334	0.762072
136817853	0.762072
444146	0.76183
10732949	0.761522
136238529	0.761366
137139937	0.761181
6419973	0.761103
51371334	0.761103
511644	0.761103
5905	0.761103
107764	0.761103
1272916	0.761103
179629	0.761103
66760234	0.76075
13009364	0.760343
1265899	0.759819
21824456	0.759819
7282400	0.759819
14367013	0.759819
7282398	0.759819
169704	0.759819
118312477	0.759819
5274204	0.759735
136921541	0.759551
125494577	0.759417
135508837	0.759292
514811	0.759264
137105585	0.759163
22895138	0.759081
489881	0.759004
163947	0.75868
136623053	0.758675
12497373	0.758666
250904	0.758666
3080744	0.758478
56977943	0.758438
454531	0.758319
15609009	0.757936
15934098	0.75773
121487531	0.75769
137139924	0.757428
162367439	0.757424
22856727	0.757424
135742144	0.757297
466022	0.757248
136195916	0.757134
137195854	0.757049
139025685	0.756841
135435111	0.756777
6479143	0.756681
136801906	0.756585
453764	0.756561
135542427	0.756527
125508952	0.756258
4102969	0.756125
10236751	0.756125
136265296	0.755474
506144	0.755253
136644173	0.755229
11758878	0.755193
136628879	0.75518
121216426	0.755126
135582772	0.75501
169716	0.754957
6481830	0.754957
22811380	0.754957
11380753	0.754952
14284094	0.754783
135453910	0.754367
163284925	0.754236
470801	0.754104
92132221	0.753932
134693185	0.753932
12873547	0.753932
6451965	0.753932
129889465	0.753732
69630326	0.753615
9816508	0.753453
10753744	0.753422
512135	0.753367
490629	0.753121
135450796	0.752956
136835831	0.752936
135402018	0.752936
135403804	0.752936
135742137	0.752936
135398592	0.752936
135544549	0.752936
137015000	0.752855
481516	0.752812
21139854	0.75263
92236279	0.75263
9992006	0.752515
22859454	0.752505
506492	0.752438
14367012	0.752428
135398631	0.752067
137208277	0.752067
15612801	0.752036
122521211	0.752036
131887892	0.752009
136232982	0.751804
18596452	0.751235
490256	0.750947
516074	0.750878
472175	0.750842
25796482	0.750842
86308410	0.750842
13927	0.750842
23519675	0.75067
469094	0.750393
15277413	0.750369
21140573	0.750012
3009782	0.749901
10708101	0.749823
137346607	0.749579
100327	0.749552
324309	0.749552
131882935	0.749387
58859108	0.749292
472172	0.749292
89341487	0.749292
122879	0.749292
21157388	0.749178
125494510	0.749037
121486825	0.748829
453832	0.748828
5274165	0.748803
56634843	0.748646
10467582	0.748544
160283	0.748494
135401003	0.748225
21634414	0.747569
137184934	0.747268
90732286	0.747239
6479148	0.74721
13831293	0.747008
510968	0.746529
6441877	0.746068
135527049	0.745894
136219930	0.745843
5272754	0.745736
15059928	0.745661
131879863	0.745557
301080	0.745557
3007771	0.745517
136205846	0.744834
22451350	0.744628
451503	0.744628
10658983	0.74451
135502924	0.744454
163285353	0.74439
11208805	0.744334
135443731	0.743853
503020	0.743835
6320414	0.743815
136273848	0.743692
451896	0.743598
135538673	0.743521
12150481	0.743389
136633725	0.743328
131858176	0.743225
125895	0.742938
15087556	0.742938
45105015	0.742574
121009003	0.742449
10491412	0.742439
135408506	0.74238
135763231	0.74238
135434851	0.742342
135509108	0.742142
136219928	0.741869
135398508	0.741869
137303707	0.741869
135546504	0.741869
136217872	0.741869
135742598	0.741869
10827042	0.741815
14484797	0.741441
6449933	0.741292
6482243	0.741292
5461897	0.741292
136176852	0.741205
359064	0.740775
72194	0.740775
491674	0.740775
92151285	0.740775
467291	0.740716
454138	0.740606
454139	0.740606
3000603	0.7406
3032355	0.7406
135515425	0.74031
10040688	0.740065
456648	0.739921
456327	0.739921
461854	0.739921
169938	0.739889
5271380	0.739859
124295	0.739859
469086	0.739698
515102	0.739452
121487343	0.739359
121487344	0.739359
453168	0.739288
498376	0.739106
12150479	0.738879
5270571	0.738879
16748010	0.738879
5271379	0.738879
124294	0.738879
133458	0.738836
10357410	0.738504
6479136	0.738407
135856015	0.738116
5271819	0.738037
11346304	0.737793
92286289	0.737618
15938965	0.737538
1549370	0.737538
172391	0.737297
5276640	0.737297
102057561	0.736294
135435173	0.736093
131698258	0.735797
50312	0.735797
5276642	0.735797
469809	0.73572
5099290	0.735684
71374245	0.735593
512172	0.735235
511997	0.734928
124466	0.734727
5276957	0.734634
21824454	0.734611
172392	0.734606
5276641	0.734606
10040433	0.734596
5271807	0.734494
150856	0.734348
121217181	0.734343
14410899	0.734106
135410303	0.734013
504734	0.733942
3008584	0.733829
5273015	0.73341
5280127	0.73335
147146	0.732857
137195841	0.732728
135498235	0.7327
135484985	0.7327
135410269	0.7327
12599	0.732582
6481845	0.732435
121487532	0.732369
12071879	0.732162
6714006	0.732162
360646	0.73211
493225	0.73211
3009858	0.73211
100652	0.731812
137128750	0.731729
135625314	0.731484
11186205	0.731324
455171	0.731206
21145867	0.731206
135524757	0.731134
14862330	0.731069
13188936	0.730993
135460966	0.730839
136927403	0.730839
135625234	0.730839
131875801	0.730794
164891	0.73069
72217	0.730207
451375	0.73016
511887	0.730109
439866	0.730033
4477522	0.730033
6478491	0.73002
136843263	0.729649
137090331	0.729649
135511868	0.729649
136257804	0.729649
135509485	0.729649
3005554	0.729508
3371855	0.729503
59728433	0.729503
14483474	0.729503
454140	0.729379
454141	0.729379
136921545	0.72922
514805	0.729155
22861866	0.72879
511719	0.72858
10405378	0.728309
155395	0.728047
274083	0.727732
97381	0.727732
131843750	0.727689
5271695	0.72755
13871387	0.72743
71317010	0.72728
44316739	0.72728
512322	0.72728
99529	0.727152
315092	0.727152
516066	0.727077
15954436	0.726986
54424807	0.726729
91668407	0.72665
135440620	0.726127
93977460	0.726106
3035491	0.726106
45039906	0.726106
512005	0.725784
514810	0.725761
136186017	0.725502
135435044	0.725502
5274087	0.725428
101670692	0.725346
136232092	0.725059
135856077	0.72469
135618698	0.72469
15081828	0.724549
452061	0.724498
14409039	0.724498
5273004	0.724497
3012586	0.72429
25266884	0.724287
3007224	0.72417
5270689	0.724002
131881311	0.723902
97119	0.723856
5271378	0.723678
65561	0.723678
11425350	0.723641
54351187	0.723598
91668349	0.72358
477950	0.723274
10565387	0.722939
87824027	0.722926
296233	0.722926
474355	0.722865
6333525	0.722603
54359085	0.722541
136734354	0.72209
14156718	0.721776
129291491	0.721751
137139936	0.721739
59628308	0.721709
76973118	0.720738
449599	0.720523
5494430	0.720482
88518334	0.720352
11436669	0.720146
136674918	0.719824
483948	0.719664
128757	0.719661
5276958	0.719488
20871287	0.719416
10517504	0.719348
121008097	0.719341
135453913	0.719097
136896502	0.719097
14260256	0.718938
162660830	0.718495
470067	0.718263
92529429	0.717813
92132144	0.717813
100802	0.717813
477853	0.71776
21117616	0.717694
5273749	0.717421
5271377	0.717421
125494151	0.717294
125494152	0.717294
6439573	0.716814
92236137	0.716803
131846804	0.716803
92236135	0.716803
265574	0.716803
358959	0.716616
136118471	0.71659
460466	0.71642
150201	0.716306
6440124	0.716306
6438371	0.716306
11057044	0.716292
121013684	0.716292
14842983	0.716286
3010291	0.716265
23519664	0.715881
90954505	0.715581
23421207	0.715531
137147094	0.715507
454001	0.715314
135467705	0.715164
438430	0.714995
145681	0.714803
133135	0.714643
70818775	0.714485
512707	0.714147
10946143	0.714033
512658	0.713966
191215	0.713908
511720	0.713899
53741175	0.713353
454142	0.712989
11098172	0.712924
10403633	0.712729
135538674	0.712656
15938966	0.712629
7065210	0.71257
21116879	0.71257
93003	0.71257
44629860	0.71257
71302592	0.712221
452096	0.711791
14430362	0.711791
131882637	0.711584
494217	0.711584
132274323	0.710986
3007123	0.710584
135434850	0.710427
135465599	0.710358
135622951	0.710358
135933068	0.710358
135627705	0.710358
136826947	0.710358
136065188	0.710358
136062166	0.710358
131848792	0.710261
151790	0.710047
6035	0.710046
6603739	0.710046
7195999	0.710046
2729613	0.710046
453762	0.709652
101075208	0.709639
135596554	0.708358
131882742	0.708301
23363310	0.707968
128866	0.707958
135398550	0.707939
135962086	0.707922
121486895	0.707738
138375992	0.707731
86645125	0.707602
121486756	0.707516
137099057	0.707114
6450919	0.70661
3081452	0.706441
139592726	0.706301
137699081	0.706301
136744872	0.706187
10541096	0.705772
46846348	0.705574
516466	0.705352
268420	0.7049
672230	0.7049
64975	0.7049
480247	0.704823
136232990	0.704527
121487526	0.704201
135764598	0.703595
11630346	0.7035
135518167	0.703437
136234097	0.703437
317398	0.703247
102213	0.703247
21856241	0.703247
58521221	0.703247
92136273	0.703247
124789650	0.703247
451817	0.703243
465413	0.703243
97300904	0.703239
451451	0.703012
14654332	0.703012
446940	0.702594
71776864	0.701792
135704021	0.701507
135519069	0.701507
12313774	0.7014
92751	0.7014
4661673	0.701354
71406419	0.701293
335400	0.700888
92264935	0.700888
507269	0.700888
3010374	0.700869
5278277	0.70077
21824453	0.700408
11746791	0.700306
150667	0.700261
101039156	0.700244
162641872	0.700211
129893514	0.700202
10474045	0.700032
3007124	0.699947
98854	0.699934
21140449	0.699934
92247230	0.699934
196676	0.699662
6481836	0.699648
136088507	0.699292
5274310	0.699108
121216232	0.698926
21829540	0.69889
129678678	0.698277
477852	0.698128
71374323	0.697845
16728571	0.697806
6602111	0.697563
13009312	0.697563
73265308	0.697563
147569	0.697563
92132157	0.697563
90488943	0.697563
462388	0.697528
77282269	0.697347
484808	0.697343
6560187	0.697308
25886830	0.697308
65085	0.697308
127258181	0.696231
138113809	0.696231
100938413	0.696229
6102683	0.696211
453820	0.695952
496427	0.695927
10922291	0.695786
98315	0.695786
121220862	0.695662
193541	0.695638
6475470	0.695343
135538026	0.695324
125507522	0.695295
159285	0.695282
22899187	0.694834
484807	0.694647
137176604	0.694377
172915	0.694305
135409474	0.694123
136126104	0.694123
5274144	0.69409
512004	0.693462
135447001	0.693405
25880707	0.693373
97297	0.693373
6419781	0.693373
45039587	0.693373
14503364	0.693145
71407741	0.692864
44266030	0.692767
439693	0.692767
134694916	0.692767
138375984	0.692707
452892	0.692698
15747441	0.691843
126567728	0.691816
135421231	0.691756
15403938	0.691556
67358	0.691344
12151656	0.691066
16666490	0.691039
122130879	0.690688
6480473	0.690174
92248239	0.68979
3007125	0.68965
195909	0.689622
11777114	0.689497
15957673	0.689437
125167	0.68925
14039728	0.68925
504751	0.689105
5278282	0.689084
121486862	0.688851
11219149	0.688719
135407854	0.688528
510999	0.688522
503813	0.688188
511017	0.688045
15955633	0.687775
121219141	0.687775
444919	0.687728
9700	0.687728
25113134	0.687728
10687208	0.687728
135538692	0.687534
92243772	0.687442
21818173	0.687442
9861379	0.68681
6481569	0.686796
135538696	0.686526
135816739	0.686331
135480588	0.686027
498020	0.685264
121486764	0.68522
10471224	0.685045
21139599	0.684895
68655403	0.684756
131882875	0.684437
316992	0.684437
136183881	0.684339
1778309	0.684175
16080049	0.684051
121487457	0.683724
148264	0.683303
23616221	0.68328
71368152	0.683244
171255	0.683169
22885208	0.683165
136270374	0.683159
369086	0.68313
131072	0.68313
90474928	0.682985
5273510	0.682662
44366461	0.682635
493439	0.682604
7058165	0.682556
5273016	0.682443
121596082	0.682222
90673693	0.682105
139025115	0.681981
21767591	0.68178
21676639	0.681254
5272659	0.680954
125014	0.680913
3005965	0.680589
6479188	0.680551
6439190	0.680551
70833226	0.680414
21854783	0.680414
118705336	0.680413
54023955	0.680345
401060	0.680311
495034	0.680307
136227111	0.680127
135482132	0.680124
137221138	0.679447
135434784	0.679447
467294	0.679443
11507479	0.679394
676166	0.679394
3034423	0.679394
6595185	0.679394
23421442	0.679284
131877129	0.678988
66599986	0.678944
131883271	0.678827
156594985	0.678715
6483431	0.678566
138114911	0.678566
125544	0.678551
194102	0.678548
135463029	0.678489
419564	0.678342
21144431	0.678342
9834501	0.678286
265025	0.678286
10956375	0.678254
13831089	0.678254
41097849	0.678254
51403981	0.678254
65510	0.678254
351382	0.678254
71314711	0.678254
6595184	0.67823
7043952	0.67823
71749030	0.678167
514812	0.678167
22873853	0.677931
131843751	0.677899
451522	0.677746
476406	0.677746
72213	0.677746
361921	0.677746
54703164	0.677687
92299334	0.677687
54677885	0.677687
135854977	0.677586
136842861	0.677586
449584	0.677166
11054122	0.677096
92266369	0.677005
92266371	0.677005
131878800	0.677005
3012252	0.676958
23279551	0.676941
444450	0.676908
149099	0.676767
131801285	0.676557
513636	0.676547
10586962	0.676468
6438736	0.676226
90472725	0.676195
469861	0.675822
137167219	0.675791
136663933	0.675791
136756019	0.675791
6338568	0.675743
490628	0.675689
139025646	0.67563
130060	0.675398
452893	0.675211
137249367	0.675045
71309464	0.674992
5272665	0.674728
155290824	0.674686
14445949	0.674557
153436042	0.674557
11779021	0.674532
71374221	0.674322
12800102	0.674173
3035760	0.674141
15693167	0.674021
136808318	0.674017
15928745	0.674017
6481567	0.674008
136229819	0.673904
121486748	0.673761
3081384	0.67374
176869	0.673653
3037219	0.673217
10915407	0.673137
10707449	0.672985
488245	0.672914
23541118	0.672889
54555880	0.672771
91524621	0.672719
6478358	0.672596
121486905	0.672537
22209663	0.672442
45357259	0.672442
59891165	0.672442
7059421	0.672442
13730	0.672442
489519	0.672442
72246	0.672442
320414	0.672089
54100215	0.672089
54213197	0.671982
512679	0.671779
135416725	0.671505
100795272	0.671335
137077012	0.671307
10778286	0.671218
136674916	0.67101
10610233	0.670869
98581	0.670631
71421157	0.670357
54297338	0.670276
125734	0.670276
439424	0.670246
71621353	0.670171
9904475	0.6698
6474236	0.669561
133125648	0.669561
14862102	0.669302
135849075	0.669228
91927745	0.669092
71340416	0.669086
135547062	0.669036
37542	0.668968
490511	0.668968
6918133	0.668895
73323	0.668848
1190	0.668848
122280	0.668848
14803551	0.668833
131857684	0.668687
23253577	0.668652
90117986	0.668584
66802809	0.668542
136666654	0.668249
10945668	0.668224
105116	0.668224
374904	0.668219
70365165	0.668219
149098	0.668148
135804809	0.668011
477552	0.667977
135708260	0.667807
135407175	0.667807
136006897	0.667807
131884455	0.667439
102152336	0.667309
54443874	0.66631
135914512	0.665769
137295291	0.665769
135768164	0.665769
135398641	0.665769
135403801	0.665769
11728978	0.665743
162640537	0.665479
10019998	0.665471
452132	0.665293
121486739	0.665266
92248971	0.66484
11129803	0.664604
453629	0.664545
136190395	0.664314
135800809	0.664111
136176844	0.664111
163285626	0.663962
451895	0.66368
136119103	0.663395
11565302	0.662974
100253	0.662698
466420	0.662698
96889965	0.662698
177273	0.662698
44240813	0.662698
11065470	0.662698
321729	0.662698
59783293	0.662698
5271953	0.662535
118294346	0.662409
146013455	0.662175
5274088	0.661736
455839	0.661667
132663	0.66153
135583321	0.661403
156588427	0.661346
466426	0.660728
14654364	0.660728
136842926	0.660634
137221145	0.660634
121486765	0.660563
21852781	0.660543
76973875	0.660392
234984	0.6595
65095	0.659336
135511113	0.659297
5272848	0.65922
10826877	0.658924
71413190	0.658907
452213	0.65889
473366	0.65889
54008737	0.658783
135406997	0.658696
65372	0.65857
11808175	0.658558
11832914	0.658558
11087275	0.658558
482505	0.658558
[truncated: 4,870 more rows]

## Sheet: 3. HSV-1
cid	Probability of anti-HSV-1
10915407	0.556022
123789960	0.552974
71431203	0.54517
137287473	0.539943
20849148	0.539467
123570113	0.538962
123993511	0.5287
136267259	0.525438
97305099	0.52488
71352076	0.521225
136265295	0.517918
136265296	0.517549
139025115	0.515156
71752893	0.513759
5273514	0.512945
135464486	0.512184
131865335	0.511894
137072542	0.508789
10924111	0.507749
500918	0.504599
5279532	0.504038
136248812	0.501857
136248813	0.499765
3087115	0.498798
5279529	0.498687
376366	0.497508
5279533	0.496864
21676639	0.49568
139025114	0.495115
135462526	0.494383
25074416	0.493609
3005555	0.492847
136242431	0.492715
121487134	0.492039
5271960	0.491997
129389389	0.491583
14376122	0.490829
3005553	0.490474
3005556	0.489993
101543	0.489975
57369657	0.489975
22787949	0.489941
22209968	0.489548
494218	0.489548
374121	0.488901
139025108	0.48884
12308857	0.488742
66535	0.488742
57047691	0.488742
14484797	0.488061
136734354	0.487924
25074417	0.487914
6481577	0.487571
117064372	0.487408
188575	0.486997
445132	0.486985
100795272	0.486757
511990	0.486408
3005550	0.485454
54683691	0.48532
3005554	0.485137
128866	0.484653
3011927	0.48462
6509778	0.48462
5279534	0.483617
139026052	0.483004
6450926	0.482649
512669	0.482649
515111	0.482611
5279530	0.48193
22841776	0.481871
3010354	0.481405
3012227	0.481377
136238529	0.481088
11042603	0.480149
11290467	0.479569
5461894	0.479347
9950702	0.479067
11514721	0.478371
132283238	0.478371
10249185	0.478371
129317836	0.478371
3392033	0.477191
449392	0.477191
57369656	0.477094
23421206	0.477094
126968625	0.477094
3005548	0.477059
118796809	0.476905
140252620	0.476862
163285485	0.476862
3005549	0.476631
132283239	0.476631
137795695	0.476631
25185460	0.476631
129317616	0.476631
7098661	0.476473
167956	0.476335
12009657	0.47622
5276959	0.476076
6439816	0.475417
15928607	0.475301
469861	0.475285
11580280	0.474247
5271699	0.474162
121487118	0.473785
44124071	0.473612
513636	0.473323
14999718	0.472944
155903787	0.472788
5273519	0.472768
150983	0.472763
137214373	0.472595
71374221	0.472565
488249	0.472522
121487124	0.472522
121487127	0.472522
374116	0.472522
121007158	0.472381
3005552	0.472288
42601468	0.472105
135921348	0.472037
117681056	0.470932
77282269	0.470818
136100249	0.470634
22867782	0.470605
5276958	0.470575
5271957	0.470457
11278700	0.470317
49849557	0.470041
453829	0.469649
69630326	0.469623
460320	0.46939
5271955	0.468728
128757	0.468718
124528039	0.468679
512678	0.468523
10638005	0.468231
90469779	0.468016
11461625	0.467963
3010797	0.467866
70021591	0.467604
6440103	0.467418
355900	0.467325
453994	0.467325
118855773	0.467029
3036471	0.467021
6475928	0.467014
88146187	0.467014
5273520	0.467003
54443874	0.466907
121015029	0.466883
21140275	0.466873
121487485	0.466539
49822695	0.465947
11001059	0.465873
121487525	0.465873
134220	0.465858
6439649	0.465858
6505368	0.465858
54432316	0.46569
131708761	0.465595
136257920	0.465436
512329	0.465417
455849	0.465089
136232990	0.465085
163320833	0.465031
135912870	0.464927
512675	0.464894
21117199	0.464832
21145447	0.464716
44829127	0.464604
6450906	0.464578
451822	0.464578
6534309	0.464478
507025	0.464478
513632	0.464236
76973315	0.464134
76973510	0.464134
131708540	0.464128
131883271	0.46407
11747043	0.46392
6918133	0.463739
137218731	0.463104
497923	0.462946
13205979	0.462898
13205980	0.462898
53794255	0.462898
124396689	0.462898
139025046	0.462825
3010352	0.462823
121487128	0.462793
488248	0.462793
121487125	0.462793
10108689	0.462577
71317045	0.462436
488241	0.462205
5282192	0.462176
500920	0.462176
6478043	0.462176
6449348	0.462176
67771073	0.461917
53795348	0.461917
21145446	0.461663
14258187	0.461638
146160048	0.461305
138058736	0.461305
137699191	0.461305
76973301	0.461132
90470680	0.461092
42637091	0.461004
129009617	0.460972
25051804	0.460916
145705996	0.460916
24769759	0.460916
456513	0.460874
11119723	0.460874
506145	0.460566
101544	0.460345
22803042	0.460345
135511168	0.460324
466039	0.460272
3036983	0.460223
13566110	0.460187
149097	0.460124
92021611	0.460118
5287975	0.459822
183242	0.459704
57346744	0.459319
460321	0.459252
444920	0.458905
121216763	0.458711
494217	0.458695
131882637	0.458695
135567131	0.458637
137198957	0.458621
452990	0.458448
71374245	0.458288
453997	0.458163
355902	0.458163
604832	0.458129
488246	0.45799
92248971	0.457904
494763	0.457866
452988	0.457805
449489	0.457588
71313037	0.457515
71776184	0.457515
21853094	0.457397
71410159	0.457265
101609	0.457239
3005551	0.457236
6440124	0.45714
150201	0.45714
6438371	0.45714
9835200	0.457118
139025680	0.457033
10389132	0.457033
133458	0.456908
21788887	0.456888
131858703	0.456822
136847919	0.456698
135398727	0.456698
136134225	0.456698
172915	0.456694
71262374	0.456581
65399	0.456581
44400589	0.456581
485376	0.45653
135823809	0.456473
150973	0.456439
131846216	0.456334
488940	0.456138
53983167	0.456137
453641	0.455998
135511167	0.455935
135464488	0.455935
3005547	0.455859
446164	0.45566
503109	0.455472
92279361	0.455462
135956774	0.455429
131886802	0.455355
121007157	0.455355
92280929	0.455127
23421207	0.455106
5273510	0.455085
139025117	0.455072
77280603	0.45506
121487089	0.455022
466022	0.454963
86592810	0.454915
13205977	0.45468
53642991	0.45468
131878154	0.454574
121217573	0.454574
15160075	0.454444
21117616	0.454397
6509777	0.454332
71309346	0.454172
5461897	0.454167
512668	0.454161
6450920	0.454161
23254967	0.454148
504747	0.454101
193604	0.453884
15160057	0.453811
92448807	0.45371
5271953	0.453556
136706893	0.453498
94358774	0.453376
511984	0.453349
11697766	0.45319
29982346	0.45319
45039581	0.45319
135596618	0.453143
44151925	0.453097
454243	0.453004
23519658	0.452969
488240	0.452802
5272753	0.452777
14999717	0.452776
92970665	0.452751
6323540	0.452563
5698	0.452563
88518334	0.452502
131886803	0.452446
90663555	0.452446
21817403	0.452399
46780426	0.45239
133688245	0.45239
139025646	0.452374
101245382	0.452372
125494152	0.452344
125494151	0.452344
121487492	0.45221
183239	0.452195
183205	0.452195
53655871	0.45192
6857539	0.451898
92271314	0.451898
21145448	0.451781
21089	0.451763
156583186	0.451763
149094	0.451758
124561689	0.451713
10125531	0.451713
54531183	0.451713
278404	0.451696
488239	0.451676
3010355	0.451527
5272204	0.451511
137191441	0.451502
256105	0.451497
41211	0.451497
12358318	0.451497
56992563	0.451497
5276957	0.451336
67331935	0.451323
72296	0.451278
146156886	0.451278
493223	0.451253
136262592	0.451089
136217255	0.451089
511997	0.451068
71302904	0.450797
150856	0.450793
6451079	0.450767
310052	0.450749
15612856	0.450749
136791445	0.450573
10085104	0.450562
12009658	0.450448
18641862	0.450435
95730862	0.450271
6482243	0.450265
6449933	0.450265
66608846	0.450256
76974063	0.450213
470796	0.450121
135464489	0.450089
54100215	0.45007
320414	0.45007
15938966	0.450038
486175	0.449989
21853097	0.449886
23263706	0.449818
492200	0.449818
11825687	0.449764
121487388	0.449705
487685	0.449577
23519652	0.449562
76973399	0.449523
53837746	0.449518
134067785	0.449443
53243689	0.44937
90472260	0.449346
49849540	0.449346
46780472	0.449346
54176875	0.449333
135410906	0.44929
331904	0.44914
14430355	0.44914
135856438	0.449087
5271956	0.44901
131858176	0.448947
5273512	0.448945
139025107	0.448855
478561	0.448715
129318777	0.448654
5276735	0.448599
169295	0.448541
13566112	0.448467
128650	0.448447
178714	0.448447
136226316	0.448447
90472728	0.448445
5274689	0.448342
5272203	0.448267
87208407	0.44818
5274144	0.448179
477953	0.448094
139025682	0.44808
511720	0.448036
10491412	0.448008
67327211	0.447992
6450904	0.447952
50989698	0.447952
121487080	0.44795
13566115	0.447801
452040	0.447685
499785	0.447665
21854430	0.447652
10753744	0.447622
12193788	0.44759
121487464	0.44759
10687208	0.44759
93036	0.447551
163285378	0.447541
5289230	0.44753
2735432	0.447506
135449322	0.447453
163203169	0.447308
135804809	0.447236
486177	0.447185
5278277	0.447161
125224	0.447122
465094	0.44709
470049	0.44709
456401	0.447076
149098	0.447047
14367012	0.447007
168120	0.446982
6475332	0.446928
449584	0.446916
121006760	0.446844
56961027	0.446778
135434784	0.446759
10378968	0.446752
10716626	0.446708
136232965	0.446684
101039156	0.446619
86592813	0.446548
131855105	0.446501
18731516	0.446499
451896	0.446315
10266797	0.446232
131853290	0.446231
3081517	0.446221
71440728	0.446207
121487433	0.446194
146503834	0.446122
189893	0.446054
121487129	0.446054
488247	0.446054
135509071	0.446036
13871386	0.44603
12803287	0.445929
21668257	0.445921
137699081	0.445839
139592726	0.445839
89486753	0.445794
135524757	0.445783
23519675	0.445708
121216429	0.445614
131885345	0.445595
73353418	0.445481
135485495	0.445469
25266884	0.445464
506146	0.445395
121487370	0.445197
49849608	0.445195
89486751	0.445172
53963604	0.445088
124528040	0.445061
512626	0.445049
9841193	0.444984
6476965	0.444984
15613706	0.444905
92249436	0.444905
53774252	0.444897
469447	0.444815
138375992	0.44481
10424498	0.444775
7124539	0.444757
69078418	0.444757
240186	0.444757
10893330	0.444631
5272210	0.444527
92237069	0.444525
276398	0.444525
21817596	0.444525
135538725	0.444521
6438736	0.444511
470053	0.444502
5274366	0.444407
92279160	0.444375
453996	0.444375
155903791	0.444362
90487625	0.444273
507024	0.444183
6534308	0.444183
129371096	0.444128
21117205	0.444128
3010410	0.444089
15081290	0.444079
196324	0.44407
191215	0.444021
68655403	0.443977
6450919	0.443888
134501092	0.443859
21140838	0.443778
488245	0.443776
5270502	0.443734
10661693	0.443734
492201	0.443648
121487090	0.443618
156588711	0.443611
3006522	0.44361
3006523	0.44361
3183	0.443537
5353599	0.443537
44629987	0.443537
446727	0.443537
68886	0.443537
6481583	0.443537
6603750	0.443537
6921725	0.443537
688407	0.443537
16219063	0.443537
167350	0.443533
13989304	0.443529
6443940	0.443466
191626	0.443381
504749	0.443299
512676	0.443289
21852789	0.443259
89858725	0.443212
172916	0.443178
163203168	0.443167
644264	0.4431
191942	0.443086
68661802	0.442981
13989283	0.442964
451371	0.442964
10923602	0.442932
125494577	0.442839
45052555	0.442667
139024626	0.442619
11807505	0.442619
10565387	0.442602
191759	0.442587
21677361	0.442558
5278280	0.44252
17754151	0.442447
5289307	0.442447
92246421	0.442413
53965369	0.442302
146066	0.442302
15277828	0.442235
23634773	0.44223
86592812	0.442221
6439191	0.442208
6479189	0.442208
3082267	0.442166
163888	0.442127
135618545	0.442126
10764891	0.442115
173318	0.442047
6441858	0.442047
121006759	0.442045
137202792	0.442043
125544	0.44204
145710203	0.441948
131852022	0.441933
21677364	0.441885
92236341	0.441867
121487082	0.441858
121487083	0.441858
101947567	0.441712
22211279	0.441641
512136	0.441609
189148	0.441583
9951889	0.441544
511719	0.441436
135407854	0.441362
56632024	0.441359
20832934	0.441337
452986	0.441321
488238	0.441312
11493311	0.441301
6030	0.441292
135484455	0.441235
136415743	0.44118
10826877	0.441172
487684	0.441129
171255	0.441128
15118621	0.44112
121487026	0.441071
71304002	0.441022
21854431	0.441005
192785	0.440977
512727	0.440905
135434850	0.440893
5271695	0.440803
5278281	0.440718
137221138	0.44065
44356940	0.440643
134694066	0.440643
92845691	0.440643
12042143	0.440643
93604123	0.440643
29982328	0.440643
169662	0.440643
135602220	0.440636
477551	0.440564
385457	0.440479
440142	0.440479
1778309	0.440448
129864	0.440391
86645138	0.44023
451890	0.440144
9921551	0.440144
340726	0.440129
124156	0.440102
510983	0.440102
10017261	0.440102
135433627	0.440098
21815879	0.440064
191091	0.440054
131884920	0.440031
16721025	0.440024
6573504	0.440023
121216298	0.440023
575855	0.439994
13989306	0.439994
139025758	0.439988
56609687	0.439984
122521211	0.43995
15612801	0.43995
514811	0.439938
121487282	0.439923
76973317	0.439861
363533	0.439829
494651	0.439829
602053	0.439819
189495	0.439817
92339825	0.439729
3010378	0.439729
13830101	0.439707
466018	0.439703
3081042	0.439662
71352407	0.439662
129437559	0.439632
6450917	0.439626
9992648	0.439588
13887579	0.439588
92132277	0.439588
7269451	0.439588
107643	0.439588
92262645	0.439588
131858479	0.439588
135602243	0.439412
135625322	0.439412
136205846	0.439305
21139860	0.439293
5274367	0.439244
469087	0.439224
138375993	0.439165
127187	0.439121
53462020	0.439121
366996	0.439118
6478491	0.4391
101643824	0.439093
131885188	0.439093
131881813	0.439078
512299	0.438929
6479191	0.438929
6435302	0.438929
488243	0.438899
10402220	0.438822
149101	0.438809
10517504	0.438793
130775	0.438765
121006658	0.438579
20600569	0.438563
135531159	0.438561
135815016	0.438561
21818055	0.438552
71315522	0.438494
92043420	0.438494
163284925	0.438421
452893	0.438363
11358266	0.438347
11163152	0.438326
260474	0.438326
6478372	0.438277
6479899	0.438236
44281962	0.438171
10826879	0.438162
194101	0.438153
73312146	0.438122
10708101	0.438115
69538220	0.438087
21140461	0.438068
127734	0.438027
512330	0.438014
6327750	0.437963
196471	0.437921
11666177	0.437886
160418	0.437854
136921547	0.43778
124768936	0.437754
8642	0.437753
449405	0.437753
25049744	0.437715
6441877	0.437713
10381436	0.437698
5270503	0.437691
135457441	0.437684
71365916	0.437672
90663546	0.437628
131886804	0.437628
131881305	0.437599
131858474	0.437592
3080705	0.437567
54235934	0.437518
136025255	0.437479
118797419	0.43744
22861745	0.437401
53759423	0.437366
13940600	0.437322
152521	0.437297
15612863	0.437273
121487387	0.437254
126961829	0.437191
129674064	0.437182
10946143	0.437166
6131	0.437128
124170	0.437128
5273493	0.437078
125508337	0.437074
125508335	0.437074
125508336	0.437074
125508334	0.437074
7058165	0.436979
135434782	0.436966
22838430	0.436961
53833608	0.436926
393545	0.436903
5273516	0.436827
137185205	0.436822
76973875	0.436784
137195841	0.436764
451842	0.436726
90952817	0.436682
136260503	0.436664
13989307	0.436641
446658	0.436608
11043760	0.436601
511014	0.436599
174519	0.436549
71371786	0.436549
135398701	0.436528
6481582	0.436462
6478042	0.436412
21140478	0.436405
92258080	0.436405
10612861	0.436375
479303	0.436319
23518344	0.436308
64979	0.436191
131876194	0.436078
57375625	0.436031
71340951	0.43601
452263	0.43601
287709	0.435989
163285120	0.435922
71773082	0.435875
56846050	0.435845
5289205	0.435826
150959	0.435782
5276734	0.43575
512137	0.435743
124202892	0.435734
6333525	0.435669
92242767	0.435543
266348	0.435543
44416697	0.435542
478559	0.435443
155903799	0.435438
6478489	0.435435
5271959	0.435344
16755631	0.435315
121006824	0.435249
512724	0.435234
446940	0.435205
77520711	0.43516
510982	0.43512
139025201	0.435108
71627217	0.435107
24773090	0.435095
301081	0.435095
163285353	0.435091
386500	0.435047
3081471	0.435036
516467	0.434916
53699095	0.434905
131885343	0.434867
6481845	0.434847
390868	0.434803
500305	0.434803
14541353	0.434737
137230633	0.434651
139026027	0.434641
57369201	0.434641
22818440	0.43463
18653297	0.434575
514816	0.434572
11594626	0.434568
135515425	0.434562
135849776	0.434528
10106291	0.434471
163320926	0.434461
71776864	0.43442
46781063	0.434355
154790033	0.434355
10062690	0.434258
452498	0.434248
77280370	0.434215
54320536	0.434166
169938	0.434133
130583	0.43413
122129480	0.434107
171490	0.434083
475377	0.434077
469095	0.434074
488242	0.434046
10092318	0.434018
10469813	0.434015
71408261	0.43396
6334181	0.433935
10492175	0.433845
164580	0.433841
324452	0.433818
6483689	0.433796
3009937	0.433747
575859	0.433743
5276961	0.433721
21140827	0.433674
152745	0.433612
124430633	0.433584
124430634	0.433584
146013455	0.433567
452039	0.433511
118991702	0.433485
124254961	0.433485
156619778	0.433485
3080720	0.433481
133126372	0.433481
18643544	0.433476
92248239	0.433364
3007780	0.433361
10684201	0.433347
91658946	0.433344
97299294	0.433344
97299293	0.433344
127792	0.43333
5272658	0.433313
456203	0.433272
11346636	0.433258
162367448	0.433258
512718	0.43312
6450927	0.433065
54109572	0.433063
9700	0.433034
25113134	0.433034
444919	0.433034
3013084	0.433025
15957676	0.432955
136808318	0.43288
15928745	0.43288
173266	0.432805
136842926	0.432754
137221145	0.432754
5272208	0.432734
5272207	0.432734
3011534	0.432688
512135	0.432688
14430362	0.432688
452096	0.432688
46780611	0.432661
139025304	0.432661
92264935	0.432627
507269	0.432627
335400	0.432627
131878455	0.432569
510574	0.432568
6480473	0.432553
451457	0.432521
510576	0.432466
516466	0.432464
23519663	0.432423
454738	0.432413
7264507	0.432338
94136	0.432338
22803666	0.432338
9562214	0.432273
131876195	0.432273
92236380	0.432273
7045516	0.432264
513124	0.432264
513122	0.432264
5894	0.432264
90673691	0.432249
127258188	0.432245
131885200	0.432167
10107793	0.432163
92249433	0.432163
13871382	0.432025
54021318	0.432025
121487874	0.431978
11151091	0.431963
233065	0.431963
124663253	0.43196
124663254	0.43196
77068305	0.43196
121487870	0.431951
23421209	0.431933
7264506	0.431933
136238394	0.431924
11129803	0.431894
76973925	0.431891
131883201	0.43187
76973629	0.43185
197020	0.431836
10377839	0.431836
121225517	0.431789
13830104	0.431758
121216596	0.431739
137176604	0.431702
12097725	0.43169
131885191	0.431688
92263388	0.431683
21140717	0.431683
23519664	0.431633
92236348	0.431585
92262454	0.431489
76282776	0.431419
131884919	0.431411
53657227	0.431406
161806	0.43134
121486765	0.431335
130209	0.431331
101518	0.431325
135618603	0.431302
131844007	0.431279
92243772	0.431261
21818173	0.431261
22880825	0.431222
22899187	0.431176
21817599	0.431173
276394	0.431173
21140199	0.431166
21140443	0.431149
12081433	0.431148
121486764	0.431135
1190	0.431127
122280	0.431127
73323	0.431127
163285434	0.431061
3012586	0.431058
503020	0.431023
439424	0.431018
160598	0.431016
86751178	0.430966
510978	0.430945
18661222	0.430856
92231367	0.430856
15509509	0.430835
3080754	0.430828
490390	0.430794
54718171	0.430787
135554439	0.430781
135398639	0.430775
148264	0.430743
12803301	0.430739
12803302	0.430739
129395379	0.430739
135398640	0.430734
44199361	0.430703
71315149	0.430687
139025281	0.430687
93476651	0.430675
10019125	0.430675
122631	0.430624
121487051	0.430624
131881445	0.43059
92233380	0.43059
499786	0.43056
100932477	0.430537
54424807	0.430535
86645125	0.430532
131882935	0.430512
356796	0.430493
121487445	0.43044
11173202	0.430402
444146	0.430395
504751	0.430368
125496087	0.430331
131843750	0.430304
135506203	0.430298
156588467	0.430281
15276861	0.430256
45033563	0.430209
459896	0.430209
12883711	0.430209
6565903	0.430209
97304120	0.430199
460322	0.430197
6450918	0.430146
29921448	0.430124
92231363	0.430124
92247166	0.430032
287302	0.430032
3035041	0.429994
6426863	0.429994
6451942	0.429994
6426864	0.429994
6479209	0.429992
512605	0.429992
49784136	0.429986
301080	0.429872
131879863	0.429872
15934098	0.429862
121487344	0.429812
121487343	0.429812
3007133	0.429768
71404177	0.429712
6481604	0.429706
136273848	0.429685
71407741	0.429657
324745	0.429621
71404160	0.429618
49866464	0.42959
56612070	0.429503
511016	0.429501
137036988	0.429483
504745	0.429479
135527049	0.429296
5273484	0.429249
65375	0.429243
21668209	0.429227
6481847	0.429208
6481848	0.429208
92233562	0.429183
7075199	0.42918
7116198	0.42918
6561296	0.42918
102601698	0.429156
504734	0.429018
282734	0.429012
189012	0.428839
131884918	0.42874
6602210	0.428725
128450	0.428607
11098172	0.428578
53853888	0.428573
20839343	0.428573
71402706	0.428547
18637700	0.428516
53724373	0.428513
477875	0.428502
469088	0.428488
478560	0.428481
129009840	0.428473
135625314	0.428442
21852786	0.428353
15118681	0.428338
18651801	0.428266
439541	0.428259
10732949	0.428228
131845437	0.428226
6439190	0.428215
6479188	0.428215
440416	0.428094
16760025	0.42805
5272659	0.428046
53965194	0.427951
21139624	0.427951
10831407	0.427942
131881293	0.427927
135460966	0.427833
136927403	0.427833
135625234	0.427833
139025050	0.427807
67447429	0.427789
70818775	0.427786
13009364	0.427786
18658060	0.427735
14030964	0.427721
64978	0.427721
102428366	0.427717
92244181	0.427717
432973	0.427713
131885190	0.427713
152475	0.427693
511017	0.427673
14581958	0.427622
24820718	0.427621
11369660	0.427619
121487449	0.427608
511015	0.427564
512725	0.427554
6439425	0.42743
49784438	0.427416
90356982	0.427342
515083	0.427315
125508952	0.427304
15928623	0.427275
444450	0.427255
6439557	0.427088
133395	0.427088
10265594	0.427088
133135	0.427053
59035009	0.427042
163285340	0.426958
358367	0.42693
121006761	0.426846
193541	0.426839
21829242	0.426834
15938965	0.426739
1549370	0.426739
10833407	0.42671
472639	0.426707
472657	0.426707
6454581	0.426706
54357487	0.426702
512005	0.426681
42553079	0.426662
42553078	0.426662
18596452	0.426644
49784134	0.426614
320720	0.42659
71442569	0.426569
488244	0.426531
16395540	0.426501
83862	0.426475
34768	0.426475
446048	0.426475
1549371	0.426475
6083	0.426475
121486796	0.426456
6439573	0.426451
149099	0.426417
21140290	0.426367
511377	0.426256
197660	0.426211
6482119	0.426211
90663906	0.426201
21855714	0.426171
5487206	0.426145
92236670	0.426122
494096	0.426122
54716343	0.426121
453628	0.42611
6915704	0.426094
3007779	0.426094
643233	0.426075
146108	0.426071
51414401	0.426071
13831291	0.426071
11832583	0.426051
131884916	0.426032
135405195	0.426006
65063	0.425994
121219169	0.425928
121487428	0.425879
15118619	0.425862
5271958	0.425862
15609009	0.425853
54571321	0.425817
133941	0.425785
135625316	0.425761
159285	0.425659
135783067	0.425634
162367444	0.42561
135583321	0.425592
53322921	0.425576
131885796	0.425557
6482246	0.425511
191599	0.425478
90674669	0.425467
454167	0.425437
49849901	0.425417
5273497	0.425399
131880512	0.425361
181830	0.425356
14502994	0.425355
451585	0.425355
20839221	0.425351
101114242	0.425348
11426143	0.425304
146158356	0.425217
6398342	0.425175
46781591	0.425132
139025303	0.425132
124766	0.425125
21122981	0.425111
3080626	0.425103
92269812	0.425103
135416123	0.425044
102067368	0.425044
512128	0.425009
54489690	0.42494
488237	0.424933
44633776	0.424932
92021270	0.424932
139025684	0.42491
5272657	0.424869
10332009	0.424865
121486885	0.424846
91669385	0.42484
465650	0.424839
10686845	0.424818
137699516	0.424796
54017251	0.424794
54165040	0.424722
54010782	0.424703
12799571	0.424701
167821	0.424697
490256	0.424683
135455539	0.424682
92243788	0.424603
121487333	0.424603
365913	0.424568
469868	0.424568
18658061	0.42453
21144622	0.424513
10849624	0.424507
21124038	0.42444
504740	0.424436
469089	0.424419
6992262	0.424395
7099911	0.424381
23617998	0.424381
97480	0.424381
6566064	0.424381
18881	0.424381
121219148	0.424351
46831074	0.424347
453830	0.424342
10494286	0.424301
135482571	0.424268
469094	0.424267
101926865	0.424214
459895	0.424213
6479143	0.424212
55281	0.424197
9943636	0.424197
6858194	0.424165
134229909	0.424131
92264929	0.424115
512134	0.424115
333596	0.424115
22880806	0.42411
3011533	0.424087
498021	0.424063
121487126	0.424063
121487130	0.424063
135538692	0.424058
451370	0.424023
13989277	0.424023
17756742	0.423884
71314761	0.423882
295521	0.423873
83533	0.423784
12898167	0.423784
107461	0.423784
44237263	0.423784
54075693	0.423649
3080611	0.423627
150667	0.423609
92231357	0.423606
100998155	0.423606
7074855	0.42359
3010374	0.423588
516040	0.42354
511995	0.423512
21151277	0.423466
12787947	0.423454
100222	0.423446
13387406	0.423439
193091	0.423411
13564810	0.423369
67763123	0.423369
69886241	0.423369
512001	0.423367
6481581	0.423367
446725	0.423341
44563542	0.423337
14862322	0.423269
23531406	0.423247
135837239	0.423244
124466	0.423209
71352576	0.423187
121486830	0.423153
25075886	0.42315
474356	0.423146
475378	0.423141
133609839	0.423136
59504120	0.423048
59504008	0.423048
59504149	0.423048
54148415	0.42302
102505730	0.423018
134229959	0.422868
21136976	0.422852
9797705	0.42285
90673794	0.422848
259345	0.422817
136229414	0.422791
451895	0.422749
11728978	0.422738
44372794	0.422716
97298911	0.422694
129368364	0.42268
129368365	0.42268
18608018	0.42268
146157777	0.42267
92221397	0.42267
65086	0.42267
92221399	0.42267
71761460	0.422656
131693	0.422634
194168	0.422564
21117413	0.422564
53744408	0.422549
54370573	0.422537
484807	0.422526
451846	0.422441
6438602	0.422403
6479190	0.422403
71402186	0.42238
5232177	0.422343
11034553	0.422321
71366478	0.422306
451369	0.422302
13989274	0.422302
71444956	0.422287
135692739	0.422273
453822	0.422258
66623225	0.422251
101343952	0.422244
22881724	0.422233
54471624	0.42223
5272754	0.422181
26974701	0.422128
14409040	0.422126
469441	0.422098
155903793	0.422087
12994226	0.42199
21580289	0.42199
6858204	0.421965
15693167	0.421879
21854428	0.421867
5274365	0.421834
175228	0.421824
10678117	0.421766
121008097	0.42176
11243974	0.421752
71356782	0.421729
16094546	0.421722
510979	0.421713
6473718	0.421711
3908006	0.421711
55262	0.421711
452029	0.421711
135407752	0.421682
490628	0.42168
6327751	0.421671
15342951	0.421671
6713933	0.421671
15979428	0.42163
5270780	0.421617
3006961	0.421612
54684286	0.421601
92440490	0.421601
54706658	0.421601
131881061	0.421554
91351996	0.421552
45052491	0.421548
448782	0.421548
54237496	0.421548
355280	0.421514
156594320	0.421495
24820365	0.421483
21855711	0.421418
278758	0.421376
15124212	0.421353
22848660	0.421353
188215	0.421349
131852023	0.421328
9992803	0.421314
135398630	0.421295
13009595	0.42128
5273490	0.421235
10019998	0.421195
54703164	0.421187
92299334	0.421187
54677885	0.421187
514813	0.42118
135434851	0.421165
156594853	0.421107
6454582	0.421073
14860269	0.421071
92244157	0.421066
97235	0.421066
419564	0.421061
21144431	0.421061
3011894	0.421042
452892	0.421041
46783075	0.42096
126963445	0.42096
451479	0.420957
14632481	0.420957
136232092	0.420902
511378	0.420868
14541351	0.420851
121486742	0.420836
640874	0.420752
3013082	0.420741
22791353	0.420724
3080753	0.420694
146979	0.420671
3007777	0.420671
71429365	0.42061
135511113	0.420572
21139829	0.420554
12599	0.420551
137699983	0.420529
476457	0.420518
136229819	0.420517
10466898	0.42051
504736	0.420505
130060	0.420479
515221	0.420471
135517354	0.420458
515214	0.420456
494284	0.420453
96545	0.420398
14806063	0.420386
196710	0.420386
131883912	0.420373
107988	0.420366
6479898	0.420363
472166	0.420363
6475206	0.420363
13989284	0.420324
451854	0.420324
7282386	0.420313
22873382	0.420261
118294346	0.420235
15747441	0.420228
121596077	0.420223
16080049	0.4202
54220117	0.420136
54276168	0.420099
140344780	0.420089
5273505	0.420086
156589112	0.420083
15667028	0.420064
454166	0.420043
131852786	0.420019
20841954	0.419994
139025195	0.41995
5271259	0.419939
135509108	0.419938
6479135	0.419932
6440090	0.419932
149295	0.419932
3007132	0.419895
137699522	0.419864
512679	0.419861
453473	0.419826
101075208	0.41982
310061	0.419795
23263710	0.419795
392940	0.419788
11436669	0.419779
23519677	0.419777
477552	0.419763
54444717	0.419741
191008	0.419694
13832606	0.419692
270262	0.419692
451843	0.419678
135511145	0.419635
14727679	0.419532
118705336	0.419462
3067878	0.419455
13994713	0.419444
125623	0.419444
451847	0.419434
299952	0.419428
71371890	0.419395
5274287	0.419366
131883911	0.41932
137208277	0.419289
135398631	0.419289
134364	0.419271
276156	0.419215
54068544	0.419215
20584074	0.419197
3082183	0.419197
136058528	0.419183
67084877	0.419153
134693227	0.419131
92221236	0.419131
92221238	0.419131
66689989	0.419129
135600345	0.419106
135461724	0.419065
5274149	0.41906
137128747	0.419051
472640	0.419049
472658	0.419049
3081165	0.419044
21821293	0.419038
136238397	0.418996
504737	0.418992
164891	0.418962
3080922	0.418956
92209277	0.418956
155885413	0.418956
69908761	0.418943
131700647	0.418939
639614	0.418939
196433	0.418923
137015000	0.418914
451876	0.418914
118855855	0.418861
15450711	0.418831
163199084	0.418831
160751	0.418831
57216635	0.418831
73442717	0.418823
92230799	0.418823
194102	0.418695
14430336	0.41865
54511089	0.418629
464374	0.418582
475380	0.418545
71229475	0.418533
136666654	0.41852
131876403	0.418509
270261	0.418509
117590597	0.418478
92242977	0.418468
92021264	0.418468
135528754	0.418447
21854434	0.41844
487683	0.418428
6479139	0.418322
53835084	0.418309
92022744	0.418309
121217181	0.418276
5274286	0.418274
455763	0.418263
10911785	0.418233
102155963	0.418225
90673693	0.418216
54428325	0.418214
135504147	0.418166
477950	0.418158
155395	0.418133
137628662	0.41813
59504108	0.418102
59504000	0.418102
59504127	0.418102
451374	0.4181
4612204	0.4181
472638	0.418098
472656	0.418098
6450944	0.418094
195200	0.418073
13871387	0.418061
131846929	0.418051
92265999	0.418051
121487459	0.418041
451392	0.418006
135547062	0.418001
121487306	0.417991
6398509	0.417974
14539818	0.417966
72212339	0.417945
15957673	0.417918
7070208	0.41788
10521478	0.41788
46783463	0.41788
688019	0.41788
96544	0.41788
12939901	0.41788
44283163	0.41788
2777912	0.41788
12939902	0.41788
451889	0.417874
122110	0.417874
509185	0.417874
504735	0.417835
487682	0.417818
3010383	0.417806
101254702	0.417765
11749237	0.41776
350834	0.417657
512717	0.417638
4661673	0.417625
121596082	0.417605
14237009	0.417584
14481266	0.417579
4393085	0.417565
6479146	0.417557
365914	0.417547
469867	0.417547
90472731	0.417547
131874830	0.417519
11697484	0.417506
53755441	0.41748
3010380	0.417454
92233554	0.417454
121486927	0.417429
6338568	0.417406
5273980	0.417385
6334060	0.417379
21145513	0.417363
49784203	0.417355
358959	0.417346
92143143	0.417345
258357	0.41734
131878904	0.41734
121487869	0.41734
131858473	0.417334
21140467	0.417328
137090731	0.41731
98519907	0.417271
21854257	0.417271
3011154	0.41724
162641488	0.417218
54561889	0.417183
121487312	0.417174
102381544	0.417095
489881	0.417084
21854256	0.41704
18661221	0.41704
92230795	0.41704
10848780	0.417038
22880824	0.417037
71302590	0.417001
14843513	0.417001
132663	0.416983
21826754	0.416971
92252368	0.416971
514815	0.416915
22211374	0.416915
4102969	0.41685
10236751	0.41685
14825624	0.416833
154701266	0.416822
10474045	0.416786
10892274	0.41676
23519671	0.416758
71761487	0.416712
121487307	0.416706
472814	0.416684
6475236	0.416684
6481833	0.416671
512601	0.416634
490392	0.416633
118855918	0.416629
3000230	0.416578
135538693	0.416545
121487093	0.416473
131859677	0.41645
189237	0.416432
121487106	0.416427
118992169	0.416407
512139	0.416404
136921541	0.416394
100998153	0.416374
90474928	0.416366
150669	0.416336
101516	0.41633
11183813	0.416311
134088	0.416307
488924	0.416296
476438	0.416255
478563	0.416232
15934097	0.416228
11957910	0.416218
5271296	0.416214
6479138	0.41613
511994	0.41613
6479137	0.41613
515210	0.416104
91926387	0.416054
11723585	0.41605
5289071	0.416046
539847	0.416031
136006897	0.416023
135708260	0.416023
135407175	0.416023
515217	0.416006
13833767	0.415997
21139907	0.415997
259853	0.415997
148033	0.415996
6479205	0.415988
131843751	0.415987
57377074	0.415946
13042007	0.415941
92150012	0.415915
108175	0.415915
5273750	0.415913
460316	0.415905
6475205	0.415899
6479900	0.415899
5273492	0.415878
3010828	0.415876
189898	0.415865
76973118	0.415818
44462780	0.415747
92266931	0.415718
171185	0.415718
13941599	0.415717
71387182	0.415699
21117472	0.415698
57357987	0.415698
345462	0.415696
131858671	0.415696
12810881	0.415657
156594865	0.415657
465649	0.415608
3010377	0.4156
92245374	0.4156
4269332	0.415526
3034646	0.415526
14826116	0.415495
5274292	0.41546
21852781	0.415435
440429	0.415435
57348664	0.415423
136843323	0.415421
10859911	0.41542
136232705	0.415363
136629981	0.415363
136235943	0.415357
53741175	0.415311
54166782	0.415291
507023	0.415254
6534307	0.415254
71394590	0.415239
125691	0.415227
3363163	0.415175
6913230	0.415175
11173824	0.415172
3008206	0.415158
6481834	0.415145
481521	0.415128
405420	0.415079
176885	0.415079
10754286	0.415079
126969957	0.415079
15931300	0.415061
101644650	0.414982
13630030	0.414923
3010385	0.414917
57398955	0.414904
21140595	0.414795
135496375	0.414782
236526	0.414758
13831573	0.414758
135625242	0.414729
146158597	0.414717
156588489	0.414717
14444210	0.414705
451821	0.414705
15673509	0.414696
135462273	0.414693
93258	0.414687
125654	0.414687
287101	0.414682
10544814	0.414682
278402	0.414667
21140410	0.414665
131856440	0.414642
71421156	0.414596
21140332	0.414595
482589	0.414591
131881042	0.41459
6713638	0.414584
4127885	0.414584
21677217	0.414584
92236327	0.414584
73514	0.414584
121487431	0.414582
10490402	0.414582
121606027	0.414569
7104031	0.414551
121487149	0.414521
90673699	0.414512
156587976	0.414505
3080744	0.414501
131875668	0.414499
273749	0.414499
515216	0.414497
44438827	0.41448
475379	0.414464
121013684	0.414453
11057044	0.414453
107769	0.414451
53775732	0.414443
14842848	0.414441
136259535	0.414415
135398596	0.414415
90472732	0.41438
96124	0.414352
92229496	0.414352
44630569	0.414226
46875339	0.414226
3010388	0.414226
92246571	0.414226
121217041	0.414185
3007776	0.414181
6915702	0.414181
131878957	0.414152
6426865	0.414144
6426866	0.414144
130601	0.414144
102152336	0.414136
14842842	0.414118
454164	0.4141
512869	0.414082
92264349	0.414082
440393	0.414046
126220	0.414046
154730315	0.414041
10586962	0.414033
71444982	0.414026
25157838	0.414023
23629091	0.414019
473083	0.414009
15276822	0.413979
121487345	0.413947
53791036	0.413935
3009862	0.413909
135616711	0.413901
153548	0.41386
45052344	0.413841
5273527	0.413808
121216248	0.413777
24011706	0.413736
10399334	0.413733
13872084	0.413707
121010102	0.413696
71371593	0.413682
136795137	0.413673
135492361	0.413673
101436	0.413626
92264844	0.413626
59885256	0.413626
14367002	0.413626
163285680	0.413593
135582356	0.413578
70697554	0.413573
513034	0.413571
136030678	0.41357
14310478	0.41356
3004988	0.413556
6426867	0.413551
6426868	0.413551
6479335	0.41354
136099021	0.413516
71439804	0.413492
53470632	0.413492
71447196	0.413492
71443380	0.413492
71443381	0.413492
11807674	0.41349
21787858	0.413477
71302591	0.413467
451383	0.413362
121235267	0.413292
10378169	0.41323
5273008	0.413187
131885958	0.413173
477014	0.413114
121487112	0.413114
54694525	0.413106
54695434	0.413106
10611929	0.413101
21134384	0.413055
588153	0.413047
13845027	0.413047
69762616	0.413039
46173764	0.413037
135854977	0.413036
136842861	0.413036
9883190	0.413035
3007221	0.413023
125495767	0.413008
129391409	0.413008
131877226	0.412991
274083	0.412975
97381	0.412975
10889684	0.412957
14862343	0.412918
57251389	0.412913
159480	0.412906
3009860	0.412836
6479148	0.412827
121487074	0.412816
12358319	0.412794
11174347	0.41279
482632	0.412786
154906	0.412784
136806184	0.412768
121487521	0.412767
5272752	0.412742
21141083	0.412733
121008681	0.412711
34365251	0.412706
68368	0.412706
7349522	0.412706
9900206	0.412705
464363	0.4127
169061	0.41266
135398597	0.412637
135596592	0.412637
476458	0.412629
54506098	0.412608
452412	0.412569
98625	0.412557
70697520	0.412537
66690715	0.412516
14237950	0.412483
6426626	0.412483
10902616	0.412462
13009365	0.412432
71305626	0.412408
45038620	0.412408
512127	0.412408
46874399	0.412408
92233558	0.412408
135713040	0.412374
191808	0.412287
3010376	0.412261
92242762	0.412261
488489	0.41226
6913097	0.412239
162640530	0.412217
131884619	0.412179
136257878	0.412159
170741	0.412097
13830486	0.412097
14464884	0.412084
496870	0.412062
5925915	0.412062
395836	0.412062
5470398	0.412062
448231	0.412045
121486942	0.411958
56671903	0.411933
136896502	0.411926
135453913	0.411926
87150598	0.411911
135602150	0.41186
136663942	0.41186
135407110	0.41186
71347466	0.411854
[truncated: 5,276 more rows]

## Sheet: 4. VZV
cid	Probability of anti-VZV
6479188	0.881228
6479189	0.879045
6479190	0.842847
483936	0.767734
6439573	0.757692
483920	0.752245
483930	0.739199
95166384	0.713384
46948803	0.713384
6438459	0.706421
6450981	0.706421
6475885	0.700991
483937	0.700547
121487353	0.692619
13051253	0.692619
88518334	0.686968
6435302	0.686601
6479191	0.686601
512299	0.686601
68886	0.685115
6481583	0.685115
44629987	0.685115
514816	0.684875
483929	0.683308
6438371	0.677397
150201	0.677397
6440124	0.677397
133458	0.675937
71347466	0.674561
53837746	0.672321
514815	0.666397
452988	0.663751
151864	0.659626
506142	0.659626
6478372	0.655101
121487129	0.65427
189893	0.65427
483922	0.651213
135538725	0.640146
42601468	0.633244
514814	0.63322
18655749	0.631499
147145	0.62885
71316819	0.62885
121487445	0.626953
483926	0.622386
46875748	0.616338
92209900	0.616338
14978	0.616338
3007220	0.616338
14885959	0.614456
14885960	0.614456
480264	0.614456
135531159	0.61202
135815016	0.61202
6479900	0.609349
6475205	0.609349
24773090	0.608586
301081	0.608586
512587	0.608388
459905	0.608388
135718450	0.599352
451457	0.587936
320720	0.587861
13940600	0.586831
6333525	0.584757
514805	0.584713
188215	0.58341
10849857	0.582856
135618546	0.58241
514810	0.582118
131878859	0.581375
488248	0.579779
121487128	0.579779
121487125	0.579779
472166	0.577545
6475206	0.577545
6479898	0.577545
16078949	0.576455
512169	0.576035
132663	0.573443
126505	0.573078
18397420	0.573078
6450906	0.572806
451822	0.572806
460322	0.572683
121487307	0.571826
483924	0.570843
21134384	0.566421
384101	0.565419
9842606	0.562818
20057102	0.560612
390215	0.560612
64986	0.560612
295521	0.55938
3080754	0.556311
3011899	0.555677
154701264	0.554375
25157838	0.553967
56608890	0.552971
174657	0.550783
21069732	0.550077
154701265	0.547542
11054511	0.546257
46780426	0.546257
133688245	0.546257
13922196	0.546257
6093357	0.546257
121427567	0.546257
3461	0.546257
46705350	0.546257
22316427	0.546044
485376	0.545999
154701266	0.542768
92237060	0.541616
97453	0.541616
97186	0.538947
46875292	0.538947
5278278	0.537464
451383	0.534863
25880707	0.534456
45039587	0.534456
6419781	0.534456
97297	0.534456
71317045	0.533464
12071879	0.529484
6714006	0.529484
294628	0.526911
130766	0.526911
54526893	0.526249
514803	0.524775
135405252	0.524406
10266777	0.523302
387981	0.523302
6450920	0.518257
512668	0.518257
512717	0.516699
492201	0.516323
452188	0.515165
122621	0.515165
336973	0.514941
451780	0.514107
14632485	0.514107
3010384	0.510908
92246004	0.510908
22211503	0.509618
516463	0.509618
454164	0.508201
126501	0.5069
477953	0.505781
453781	0.504986
460315	0.503764
71229475	0.501811
139086336	0.50137
490684	0.500895
146503834	0.500588
24820365	0.500297
6618663	0.498433
7078333	0.498433
13020162	0.498433
118855897	0.498433
131854196	0.498433
121487430	0.498433
71308982	0.498433
139024626	0.498433
11807505	0.498433
90472729	0.498433
90470943	0.498433
6566029	0.498433
7282396	0.498433
445408	0.498433
57057957	0.498433
71775556	0.498205
71315467	0.497634
13477311	0.497634
473278	0.497634
135541390	0.497138
483942	0.497068
483921	0.495373
102155963	0.494551
135401030	0.493972
23519652	0.493716
11749237	0.493608
6475886	0.493271
14862324	0.493205
488940	0.492507
136842757	0.491939
511994	0.490406
6479137	0.490406
6479138	0.490406
118034228	0.490044
453201	0.48921
483923	0.488951
453474	0.488794
6479136	0.488762
15289164	0.488515
72212336	0.488515
10029973	0.488329
11380753	0.486657
14999717	0.486612
122879	0.486557
89341487	0.486557
58859108	0.486557
310061	0.483201
23263710	0.483201
21140290	0.482971
91809617	0.482608
71350138	0.481092
11162398	0.480939
447628	0.48076
158855	0.480444
139025107	0.479836
15289165	0.477602
146980	0.475031
153103	0.475031
86645138	0.474995
10065192	0.474704
92264741	0.474704
476460	0.474404
50989698	0.472227
6450904	0.472227
194102	0.472174
490627	0.470336
5271276	0.470331
449623	0.470238
174316	0.470189
460321	0.469727
92242775	0.468899
3006169	0.468899
10402220	0.467207
511990	0.466596
476461	0.46643
135463029	0.465531
135618603	0.464595
5273017	0.464232
6320191	0.464232
12097726	0.463883
446940	0.463331
476449	0.463298
3007780	0.463259
490263	0.462837
91603773	0.462111
91541	0.461312
44289445	0.461312
92143407	0.461312
490628	0.460879
117951445	0.457989
183205	0.457098
183239	0.457098
131879085	0.45661
14862108	0.455118
10515947	0.453935
514804	0.453726
481524	0.453704
3007224	0.453082
326808	0.453039
44329981	0.453039
10061135	0.452683
24769759	0.451974
25051804	0.451974
145705996	0.451974
134067785	0.451843
386500	0.451262
54194934	0.451151
6479899	0.450114
125352184	0.45005
12067880	0.449174
13833654	0.448966
451458	0.448966
3007223	0.448729
4612204	0.4477
451374	0.4477
452962	0.447399
122650	0.447399
454738	0.447295
121487527	0.446174
21147325	0.445524
10850176	0.444387
6450927	0.443648
460320	0.443408
6334181	0.44299
121487417	0.44289
71302904	0.441212
504749	0.440961
10040688	0.440861
11501773	0.440596
60122232	0.440143
59844438	0.440143
500902	0.440143
13871035	0.440143
13871033	0.440143
44316328	0.440143
92845515	0.440143
71621351	0.439805
493439	0.439744
15036533	0.439707
57097210	0.439707
90176383	0.439707
146979	0.439494
3007777	0.439494
3010388	0.438884
46875339	0.438884
92246571	0.438884
22791353	0.437847
6439549	0.437544
20839332	0.437544
133332	0.437544
135538675	0.437444
476458	0.437404
183242	0.43726
3007909	0.437218
14367030	0.437099
15928623	0.436981
477950	0.436436
10716626	0.435182
469090	0.434718
149295	0.434673
6479135	0.434673
6440090	0.434673
137195841	0.434019
121487067	0.433528
3000303	0.433
3000242	0.433
124396689	0.432888
65563	0.431928
121698	0.430366
13052734	0.430366
91525741	0.430364
21115140	0.430312
13590781	0.430312
10777654	0.430312
71314901	0.430312
72327	0.430312
11065206	0.430312
44289645	0.430312
5270576	0.430312
160155	0.430235
12805651	0.430235
71394590	0.429543
15957045	0.42952
22792111	0.429519
354624	0.429147
9882903	0.429147
453782	0.428825
6483433	0.428686
455763	0.428647
480265	0.428431
13845027	0.427421
588153	0.427421
135409780	0.427306
6478491	0.426293
100416	0.42594
453473	0.424208
21147181	0.42369
24867261	0.42369
20279	0.42369
44633776	0.423571
92021270	0.423571
9794951	0.423374
14862326	0.42297
132274323	0.421953
3011897	0.42191
71422951	0.420843
508215	0.420456
12018568	0.420163
12097724	0.418919
464373	0.418873
464378	0.418751
460317	0.418323
126567807	0.418151
476450	0.417891
56664677	0.417568
14284094	0.417266
481523	0.417089
464376	0.4163
15719357	0.415896
5272907	0.415884
14430116	0.4158
100938413	0.415687
11666177	0.415239
15612799	0.414897
451572	0.414739
135410302	0.414724
6479143	0.414557
121486817	0.41435
452132	0.414179
101644650	0.414148
71442569	0.414122
460316	0.413405
476439	0.413238
464374	0.41307
86645125	0.4129
56612070	0.412814
9795336	0.412424
11161826	0.412197
452986	0.41155
476457	0.411447
10516095	0.410778
453641	0.410589
137937484	0.410412
14061175	0.410412
53833608	0.409923
512590	0.409288
14237009	0.408964
3011898	0.40877
137221138	0.408363
67447429	0.408183
135506574	0.407686
451527	0.406654
71773082	0.406315
10754286	0.40617
405420	0.40617
126969957	0.40617
176885	0.40617
512003	0.406149
9996041	0.405886
10266797	0.405718
135741933	0.405493
10357410	0.404212
131858702	0.404065
127931	0.403361
379817	0.401688
190488	0.401688
139024710	0.401438
13845018	0.401438
124683	0.401438
13845019	0.401438
163285680	0.401385
11140845	0.401385
129350	0.401385
9943400	0.401385
15928727	0.401385
44626655	0.400705
493452	0.399692
470030	0.399526
131877226	0.399504
6479146	0.39932
498021	0.399259
121487126	0.399259
121487130	0.399259
125544	0.399215
3035713	0.399119
139025758	0.398361
453830	0.398086
101254702	0.397969
135407853	0.397931
136842876	0.397931
135508096	0.39788
53795348	0.397826
67771073	0.397826
102381563	0.397766
453180	0.396967
121487526	0.396959
71414969	0.396592
11580280	0.396371
10039594	0.396322
131881042	0.396035
14503009	0.395066
453034	0.395066
122625	0.395066
469442	0.394059
152488	0.393219
3005959	0.39261
451453	0.39229
29921449	0.391985
12009657	0.3916
475377	0.391117
122622	0.389898
12097725	0.389664
14604625	0.389335
5274212	0.389148
135482132	0.388897
6481236	0.388337
57453628	0.388337
124223848	0.388337
374108	0.388074
9900146	0.388074
6913097	0.387594
512718	0.38743
5274085	0.386436
22880803	0.386324
512605	0.38627
6479209	0.38627
92252649	0.38548
97675	0.38548
92252648	0.38548
21676639	0.385439
6450944	0.385315
128359	0.384771
5276644	0.384571
514806	0.384571
23317974	0.384571
136226316	0.38435
136242431	0.38435
128650	0.38435
178714	0.38435
18641862	0.383232
13871050	0.383135
503304	0.3828
64979	0.382537
3010386	0.382519
6481578	0.381669
188967	0.381669
11277569	0.38108
121487869	0.380037
107988	0.379698
135602220	0.378331
500903	0.37779
137705912	0.37779
13830457	0.37779
58463530	0.37779
49779988	0.377651
137147094	0.377052
135627630	0.376569
44237263	0.376328
12898167	0.376328
107461	0.376328
83533	0.376328
3011900	0.37623
514819	0.374832
516466	0.374244
73312146	0.374206
129317836	0.373764
11514721	0.373764
10249185	0.373764
132283238	0.373764
22880806	0.37371
358368	0.373518
23629091	0.373383
451394	0.372702
484806	0.372673
6509777	0.372491
136434268	0.372186
10778285	0.372177
89998825	0.372177
132073959	0.372177
131887892	0.371957
453025	0.371498
453020	0.371498
121487046	0.37109
135410239	0.370859
44304177	0.37054
118705321	0.369993
514818	0.369241
504747	0.36923
452680	0.368201
477015	0.367871
5276959	0.367798
135659015	0.367643
95730862	0.367634
121487870	0.367545
126968624	0.36741
21854299	0.36741
10445677	0.367346
71354328	0.367346
15081290	0.367153
148264	0.366107
14444210	0.365763
451821	0.365763
186930	0.365626
5271785	0.36549
121216262	0.364808
451876	0.364796
454163	0.364786
19989149	0.364786
135457959	0.364673
135483717	0.364673
487685	0.36461
91150325	0.364245
135991622	0.363687
90674669	0.363673
476438	0.363658
136250325	0.363034
13830101	0.362885
358367	0.362843
67113473	0.362692
9900206	0.362507
64978	0.362417
14030964	0.362417
336967	0.361834
58078371	0.361527
101114242	0.361502
481522	0.360636
512591	0.360577
18658703	0.360181
14409040	0.360073
44593585	0.359833
464603	0.359545
6481582	0.358841
182378	0.358833
5273627	0.358816
5271956	0.35878
66906535	0.358746
147146	0.358343
71621663	0.357849
3007132	0.357386
511995	0.357366
512719	0.356813
50987538	0.356813
135433653	0.356547
453195	0.356383
101335355	0.356376
14258187	0.355278
92280929	0.354894
487684	0.354616
6573798	0.354209
453467	0.354209
21118337	0.354209
108074	0.354209
10922698	0.354209
512725	0.353898
452682	0.353717
5271957	0.353713
476465	0.353631
9835398	0.353599
3011893	0.353599
3082596	0.353548
453835	0.353524
121487053	0.353349
71421157	0.35319
53781503	0.353131
5273624	0.352578
512001	0.352503
6481581	0.352503
604832	0.352007
13887514	0.351271
121487106	0.350627
10684201	0.35038
643233	0.350228
90348021	0.349981
358197	0.349735
21145733	0.349735
452858	0.349735
15957676	0.349649
10686845	0.349418
134229912	0.349141
131882935	0.348617
174373	0.348474
12081433	0.348138
453820	0.347615
71421156	0.347502
15673565	0.347448
72250	0.34719
380084	0.34719
71750617	0.34719
71340951	0.34688
452263	0.34688
452893	0.346842
11173824	0.346778
451579	0.346716
3011905	0.346219
15940294	0.345807
511997	0.345766
168364	0.345705
91827907	0.345584
10684273	0.345386
57246734	0.345335
10849690	0.345335
10067373	0.344769
5272747	0.34469
453657	0.344591
493454	0.343742
21769885	0.343368
197610	0.343328
10517505	0.343328
21853094	0.342961
21677361	0.342921
514813	0.342806
490265	0.342698
15342951	0.342109
6327751	0.342109
14803551	0.341539
152162	0.341269
94480465	0.340872
9882803	0.340872
121216596	0.34037
49784135	0.340245
15991535	0.340214
121487464	0.340027
12193788	0.340027
124466	0.33999
3002879	0.339985
118705336	0.339917
3007221	0.339624
11107495	0.339429
132842	0.338903
21853097	0.338901
22094552	0.338754
18469116	0.338754
5270727	0.338694
10563947	0.33798
5289307	0.337856
17754151	0.337856
11758878	0.337501
3081165	0.337194
512724	0.337167
135462526	0.336954
71761487	0.336805
22875361	0.336179
121487025	0.336135
15957673	0.336029
14862343	0.335875
14862322	0.335814
3007216	0.335567
452695	0.335374
72182	0.335203
101075208	0.335094
514817	0.334972
13915760	0.334941
54276168	0.334912
476448	0.33465
136260503	0.334576
453027	0.334509
451503	0.334209
22451350	0.334209
11551453	0.334053
135407854	0.333914
487687	0.333848
54528106	0.333572
3081042	0.333321
71352407	0.333321
138375991	0.333214
6441877	0.332897
512004	0.331809
12009658	0.331539
5272908	0.331368
67566518	0.331204
514812	0.331052
71749030	0.331052
121486851	0.330783
71621353	0.330773
92243772	0.330694
21818173	0.330694
11608602	0.329987
469286	0.329987
135459382	0.329703
135616961	0.329703
136806576	0.329703
71404177	0.329637
13989345	0.329181
66623225	0.329086
68810748	0.329074
11403295	0.32887
54511089	0.328719
51346748	0.328021
16398721	0.328021
71313574	0.328021
3246700	0.328021
119025583	0.328021
11043760	0.328021
35370	0.328021
56846050	0.328021
49849901	0.328021
455007	0.328021
5726	0.328021
121487345	0.328007
5273975	0.327295
98801	0.327015
136682650	0.326928
136260091	0.326928
6475823	0.326861
10085104	0.326823
11778706	0.326781
69626224	0.326781
92132405	0.326781
117590598	0.326088
171228	0.326017
135456714	0.325589
72272	0.325384
13833646	0.325188
13833648	0.325188
451362	0.325188
23519671	0.324642
10265713	0.324458
23112625	0.324458
9943636	0.324454
55281	0.324454
121486745	0.324285
474356	0.323983
469095	0.323927
6481837	0.323666
452039	0.323603
5272749	0.322857
134229909	0.322535
6450918	0.322336
10780244	0.322193
6479335	0.321929
272039	0.321742
121008390	0.321207
121487521	0.321133
6450919	0.320979
42552656	0.320724
42552658	0.320724
10638005	0.320665
152387	0.320467
54351187	0.320332
131883271	0.319079
510972	0.318923
135764690	0.31886
135778987	0.31886
135435172	0.31886
135753280	0.31886
161934	0.318664
92852197	0.318664
4437528	0.318664
483946	0.318413
5271955	0.31817
266348	0.317829
92242767	0.317829
6475928	0.317763
22875360	0.317673
13712878	0.317554
124201	0.317414
454243	0.317299
154726303	0.317074
54437788	0.316923
10541096	0.316204
131886802	0.316192
121007157	0.316192
10107217	0.315952
10849717	0.315692
121486960	0.31558
70021591	0.315341
137628662	0.315289
135538690	0.314898
469088	0.314431
5273977	0.314108
6483431	0.314103
138114911	0.314103
10833407	0.313968
44250004	0.31392
192597	0.313223
73351959	0.313172
464363	0.31273
131854439	0.312387
5272748	0.31206
5272750	0.312042
280444	0.312039
9881866	0.312039
136020842	0.310798
15955042	0.310586
11558298	0.31053
289971	0.310487
448403	0.310487
22838430	0.310401
131884919	0.309742
92286289	0.309637
121487110	0.30961
477017	0.30961
477016	0.30961
6481568	0.309454
451832	0.308865
6483432	0.308617
542606	0.30855
129893514	0.308261
128557	0.30823
136803255	0.308063
121486905	0.307668
352589	0.307647
135625314	0.307519
121487096	0.307499
177273	0.307423
466420	0.307423
59783293	0.307423
96889965	0.307423
100253	0.307423
321729	0.307423
11065470	0.307423
44240813	0.307423
10589260	0.307218
15928607	0.307198
6479133	0.307092
481530	0.307085
71420849	0.30699
121219148	0.306973
490264	0.306823
54075693	0.306755
24885222	0.306518
13009595	0.306492
6858204	0.306476
211875	0.306174
67327211	0.306126
71351698	0.306074
118703664	0.305782
11311503	0.305782
58455422	0.305782
58463518	0.305782
57453626	0.305782
118703665	0.305782
134715536	0.305692
119051	0.305679
3010356	0.30564
14308792	0.30564
86295187	0.30564
14308791	0.30564
3006522	0.305621
3006523	0.305621
6475332	0.305576
296233	0.305513
87824027	0.305513
71761460	0.305229
13989304	0.305198
136236455	0.304951
131884920	0.304867
23399682	0.304651
453821	0.304407
73316	0.30435
3010825	0.304319
3032355	0.30412
3000603	0.30412
137230682	0.303973
6439816	0.303857
5461894	0.303857
490621	0.303738
490623	0.303738
137212578	0.303652
5271296	0.303641
3010385	0.303172
23519664	0.302603
21829243	0.302335
6915704	0.302303
3007779	0.302303
452421	0.302149
136030678	0.302024
5273514	0.301382
148744	0.301
454120	0.300496
3012227	0.300293
163947	0.300179
71487589	0.299836
23519662	0.299674
469089	0.299559
190030	0.299548
131858703	0.299469
481081	0.299269
481083	0.299269
13071768	0.298962
504745	0.29859
26323207	0.298544
51521949	0.298544
15333756	0.298544
20646474	0.298368
10469019	0.2975
121486953	0.297283
125384	0.297253
67841222	0.297154
67841326	0.297154
13989306	0.296995
575855	0.296995
504751	0.296756
10378968	0.296456
101245382	0.296273
401060	0.296209
447864	0.296149
69626062	0.296149
70700492	0.295717
191803	0.295214
9838550	0.29444
22880800	0.294292
433458	0.293959
14999718	0.293878
121486933	0.293382
10108689	0.293141
5273626	0.293037
6449348	0.292795
500920	0.292795
10869630	0.292684
13279	0.29225
76973308	0.29225
27556881	0.29225
440055	0.29225
71771894	0.29225
1835	0.29225
71750272	0.29225
506144	0.29202
23149721	0.291551
10492927	0.291551
154703233	0.291406
13566115	0.291334
97454	0.290318
3010400	0.290186
71407741	0.29008
22880808	0.289108
97305099	0.289068
484807	0.289051
510979	0.288902
512594	0.288866
500209	0.288823
381336	0.288823
92846012	0.288298
92209904	0.288298
92209902	0.288298
44330586	0.288298
23616027	0.288298
3007918	0.288298
6245	0.288298
21776949	0.288298
121486876	0.288249
86751195	0.288009
101335352	0.287852
121486862	0.287749
162660830	0.287711
121486885	0.287695
152743	0.287672
152369	0.287574
10403633	0.287565
136633647	0.287563
136235943	0.287471
135464486	0.287461
136674918	0.287339
21136976	0.287039
15485096	0.286626
21151082	0.286582
146156886	0.286432
6398509	0.286205
131884918	0.286188
126567728	0.28553
163320923	0.284863
452772	0.28486
189165	0.284797
12042794	0.284647
14367004	0.284581
126456225	0.284581
2723654	0.284568
7156910	0.284568
2729612	0.284568
2823635	0.284568
6541377	0.284568
67762	0.284568
3002157	0.284331
128866	0.284272
93258	0.284231
125654	0.284231
135439474	0.284088
102381544	0.283923
121486824	0.283801
513636	0.283739
54471624	0.283664
469866	0.283462
10805757	0.283216
685002	0.283216
9797212	0.283216
1250152	0.283216
3000291	0.283207
453833	0.283207
156594853	0.2831
453632	0.28268
126945	0.282384
91668445	0.282341
4866813	0.282228
121486936	0.2822
10019998	0.282166
6481604	0.281801
14862330	0.28151
469869	0.281238
494763	0.281184
453370	0.281097
13941596	0.280837
13989347	0.280804
57368267	0.280804
21125843	0.280796
13989343	0.280747
136236477	0.280531
481515	0.280503
92233562	0.280396
514811	0.280388
10446782	0.280088
132942400	0.279809
29982443	0.279737
77844502	0.27971
135742141	0.278722
121228750	0.278674
69527463	0.278531
130712	0.278369
452065	0.278026
136472445	0.27799
136062187	0.27799
135409288	0.27799
135410907	0.27799
135783064	0.277959
135483976	0.27786
135483941	0.27786
77520711	0.277671
373406	0.277477
6454582	0.277345
136176852	0.277081
171490	0.277031
23260220	0.276974
15333771	0.276957
10678117	0.276738
3006222	0.276663
124715	0.276663
3007920	0.276663
10633834	0.276633
166772	0.276633
119209	0.276633
448456	0.276633
166753	0.276633
10610280	0.276633
131699279	0.276633
126963445	0.276633
134667	0.276633
118855773	0.276633
102601698	0.276633
118855911	0.276633
5789	0.276633
71308516	0.276633
162681	0.276633
155903799	0.276633
451756	0.276633
118855907	0.276633
102602258	0.276633
134556	0.276633
57369864	0.276633
72247	0.276633
10911785	0.276633
46783075	0.276633
46783076	0.276633
10977646	0.276633
7048808	0.276633
190287	0.276633
10999219	0.276633
10868509	0.276633
90472730	0.276633
97000	0.276583
92918	0.276583
7282382	0.276583
124428635	0.276583
14135553	0.276583
89858725	0.276317
51360252	0.276273
456259	0.275925
484832	0.275925
512669	0.27584
6450926	0.27584
92279160	0.27584
453996	0.27584
77620858	0.275769
464364	0.275734
488246	0.275608
173318	0.275473
6441858	0.275473
58478862	0.275373
9971101	0.275373
335400	0.275224
92264935	0.275224
507269	0.275224
10264873	0.275122
161470	0.274969
10946143	0.274417
10517504	0.274417
10565387	0.274417
21144466	0.274247
92243924	0.274247
131852344	0.274218
57368268	0.273721
90474928	0.273625
134150	0.273364
3005946	0.272895
121487081	0.272873
135411006	0.272701
14997767	0.272548
7061011	0.272548
3646225	0.272548
5271958	0.272454
10015847	0.272344
5271953	0.272196
469792	0.272162
121486927	0.272062
6455271	0.271995
13009364	0.271926
451369	0.271904
13989274	0.271904
3037127	0.271899
492200	0.271856
136217880	0.271815
452990	0.271763
22875362	0.271705
483927	0.271664
164891	0.271638
42553079	0.271597
3005949	0.271543
513058	0.27115
54166782	0.270605
7065210	0.269758
21116879	0.269758
44629860	0.269758
93003	0.269758
11098172	0.269758
1838	0.269596
92245911	0.269466
268421	0.269466
453822	0.269428
14862110	0.269259
118294346	0.269245
470067	0.269134
135538691	0.269093
136737001	0.269067
135429682	0.269067
121487134	0.269003
453036	0.268872
135515425	0.268778
121486947	0.268741
11697484	0.268602
5271695	0.268393
481527	0.268193
135485495	0.268104
54402739	0.267951
71352378	0.267937
135513856	0.267923
3007776	0.267834
6915702	0.267834
92236674	0.267769
100998153	0.26772
23519663	0.267497
121486943	0.267432
121216232	0.26737
86288424	0.267364
3034599	0.267265
134004	0.267158
21121840	0.267158
493223	0.266782
452097	0.266687
14430375	0.266687
154705590	0.266641
5272826	0.266572
446164	0.266513
451824	0.266459
6449933	0.266351
5461897	0.266351
10405378	0.266155
131883224	0.265815
451392	0.265528
135484985	0.265485
135498235	0.265485
135410269	0.265485
512005	0.265428
70874215	0.265334
86592810	0.265294
464365	0.26522
21778597	0.26522
279519	0.26522
6479208	0.264932
374904	0.264865
70365165	0.264865
99549	0.264842
121486973	0.264796
452513	0.264455
54336181	0.264139
512595	0.26393
15450939	0.263839
189921	0.263573
13871395	0.263549
100533	0.263098
3009937	0.263052
121487306	0.262488
21140332	0.262382
3010398	0.262375
3010383	0.262365
7059457	0.262298
12922945	0.262298
1814	0.262298
2783891	0.262298
122110	0.262057
509185	0.262057
162641488	0.262057
451889	0.262057
453997	0.261987
355902	0.261987
97184	0.261849
266223	0.261849
54309519	0.261849
146152	0.261633
136921547	0.261422
131849184	0.261405
451603	0.261378
14826943	0.261158
10945668	0.261132
105116	0.261132
3011535	0.261078
121487017	0.261055
58956275	0.260763
390868	0.260424
10471224	0.260345
14215165	0.26008
5276957	0.259895
5273750	0.259831
13871387	0.259803
73353418	0.25975
497923	0.259674
57197621	0.259587
101507	0.259587
21117608	0.259587
94842080	0.259587
27556877	0.259587
352976	0.259587
54669719	0.259587
151382	0.259587
688478	0.259587
138375992	0.259151
135422917	0.259045
131845437	0.258923
12800102	0.258913
14502994	0.258808
131881293	0.258732
135625316	0.258698
146013109	0.258689
175972	0.25854
6323540	0.258498
5698	0.258498
121487418	0.258175
451566	0.258052
54343230	0.258047
130680	0.258023
3007215	0.257965
159912	0.25789
73317	0.257886
131846682	0.257607
4569866	0.257607
22316435	0.257578
9994200	0.257578
15677395	0.257578
488245	0.257553
125382	0.257535
128450	0.257307
121006820	0.257292
21677364	0.256919
159738	0.256421
46936923	0.256421
15172869	0.256387
44630569	0.256313
13009365	0.256247
135407752	0.256223
509188	0.256165
66524133	0.256038
122130544	0.255619
188575	0.255505
3901376	0.255466
13009730	0.255466
67353063	0.254877
50989162	0.254752
512720	0.254752
10933976	0.25474
127259583	0.254667
7075232	0.254404
3005964	0.254183
135511145	0.253892
3010828	0.253513
14159235	0.253499
72212335	0.253499
5273013	0.253426
338571	0.253291
136260496	0.253267
92151285	0.253068
359064	0.253068
491674	0.253068
72194	0.253068
121486935	0.252709
121596082	0.252566
90472725	0.252566
6481572	0.252561
509189	0.252533
3012046	0.252079
129735822	0.251916
163285627	0.251916
3000371	0.251905
162641872	0.25166
439693	0.25166
134694916	0.25166
44266030	0.25166
584362	0.251653
14607014	0.251591
21769748	0.251503
14991719	0.251386
121487095	0.251386
92236337	0.25129
3006170	0.25129
133126372	0.251287
3080720	0.251287
136195916	0.2512
5270780	0.25118
5276640	0.251173
172391	0.251173
44292105	0.250981
54464796	0.250981
595375	0.250551
67175601	0.250508
135596626	0.250162
92529429	0.250155
92132144	0.250155
100802	0.250155
6479205	0.250113
88175526	0.250086
71356777	0.249934
493442	0.249914
18660583	0.249837
86592813	0.249735
3008134	0.249648
5273979	0.24938
54556091	0.249342
135616711	0.249256
469441	0.249212
131801285	0.249179
3011924	0.249061
509187	0.249022
136734354	0.248754
136272494	0.248738
482511	0.24846
503011	0.248431
165600	0.248431
101643824	0.248191
469868	0.248019
365913	0.248019
10935032	0.247973
53901126	0.247967
66619645	0.247964
92236430	0.247479
453461	0.247454
509186	0.247454
509184	0.247454
512332	0.247291
59891165	0.247073
121486748	0.247073
7059421	0.247073
72246	0.247073
10586962	0.247073
22209663	0.247073
489519	0.247073
71309464	0.247073
45357259	0.247073
71776864	0.247073
91524621	0.247073
13730	0.247073
23279551	0.247073
3005548	0.246881
135499473	0.246785
452055	0.24676
21115127	0.24676
72265	0.24676
10967359	0.246598
135433622	0.246221
135422884	0.246221
10990861	0.246162
45357852	0.246157
29924995	0.246157
138375993	0.246142
121487460	0.245914
6858194	0.245912
464388	0.245748
131876194	0.245583
10355712	0.245152
54263300	0.245152
92021611	0.24503
475378	0.24497
6478042	0.244869
452892	0.24469
135618021	0.244581
511984	0.244361
135578002	0.244347
155905705	0.244295
451830	0.244244
15612873	0.244234
121487485	0.244142
14237479	0.244127
14018661	0.244074
152745	0.243756
135783067	0.24369
131881445	0.243407
92233380	0.243407
533841	0.24307
516467	0.243067
136768581	0.243005
156589113	0.242905
156594202	0.242863
15124212	0.242842
71352385	0.242832
71337875	0.242832
125508952	0.242811
10735437	0.242794
77280603	0.242647
3011931	0.242582
15693249	0.242556
160130	0.242461
91046277	0.242403
14232184	0.242306
73479	0.242285
9856746	0.242242
56977943	0.241978
452277	0.241936
98561	0.241889
288008	0.241889
13845038	0.241833
162354766	0.241613
512727	0.241579
11358266	0.241417
14079545	0.241395
11390847	0.241374
92221399	0.241154
65086	0.241154
146157777	0.241154
92221397	0.241154
136267259	0.241028
65050	0.240911
25632117	0.240911
51571861	0.240911
57113422	0.240911
135743936	0.240879
135583322	0.240879
3008139	0.240807
71341063	0.240791
10356486	0.240791
10265867	0.240791
67785972	0.240791
515099	0.240773
15277413	0.240736
131881813	0.240699
451366	0.240673
13833655	0.240673
13009044	0.240476
10334791	0.240265
504735	0.240237
13566110	0.24009
121007013	0.239938
481516	0.239796
53856507	0.239761
487683	0.23976
54017251	0.239668
72201	0.23965
14485380	0.23965
5270525	0.239557
76282776	0.239342
121486963	0.239289
135618594	0.238932
131864317	0.2389
484808	0.238778
14630157	0.238707
138375984	0.238503
3358362	0.238175
44432644	0.238175
23264551	0.238128
24823117	0.237962
131858473	0.237926
5271960	0.237697
9816508	0.237633
13989335	0.237485
13989334	0.237485
5274084	0.237471
10946114	0.237404
135517354	0.237279
54121140	0.237224
131881064	0.237204
92247204	0.237204
20722666	0.237202
451455	0.237145
134694010	0.236979
92131910	0.236979
191372	0.236979
92979557	0.236979
172392	0.236746
5276641	0.236746
137205375	0.236674
126970070	0.236465
68768358	0.236465
72249	0.236418
93621995	0.236418
21115121	0.236418
13871052	0.236272
392120	0.236065
3008192	0.236056
149101	0.235817
121486901	0.235773
135583321	0.235752
92161689	0.235638
14731753	0.235638
269843	0.235638
121216248	0.235584
87208407	0.235209
136387048	0.235133
3008584	0.235129
162367439	0.235002
22856727	0.235002
53741175	0.234991
21140723	0.234974
54220117	0.234942
124411	0.234877
97300838	0.234821
515101	0.234571
129437831	0.234531
77844503	0.234496
125836	0.23433
69459168	0.23423
490626	0.234168
11119722	0.234095
121007446	0.23408
476466	0.234007
453656	0.233908
135421231	0.233899
3065117	0.233847
6480502	0.233833
91483617	0.233815
53463804	0.233728
196709	0.233728
575859	0.233397
483933	0.233295
512601	0.233254
136232705	0.233241
136629981	0.233241
155377	0.233211
57346774	0.233206
92233558	0.232631
71305626	0.232631
512127	0.232631
46874399	0.232631
45038620	0.232631
71365916	0.232548
92242977	0.232547
92021264	0.232547
135456775	0.232083
121486930	0.232019
452053	0.232019
469086	0.231962
86308410	0.231927
472175	0.231927
25796482	0.231927
13927	0.231927
124561689	0.231891
10125531	0.231891
54531183	0.231891
100997305	0.231815
451882	0.231772
154726241	0.231743
512735	0.231702
71749595	0.231702
13989307	0.231679
53968525	0.231493
513276	0.231438
453631	0.231337
5270802	0.231256
256026	0.231256
72257	0.231141
453767	0.231027
135398630	0.230893
72264	0.23082
452036	0.23082
3010380	0.230812
92233554	0.230812
11780619	0.230722
135457441	0.230611
16397765	0.230606
102057561	0.230552
512626	0.230479
163285626	0.230475
516053	0.23039
515100	0.230356
121486825	0.23025
13830104	0.230245
66689989	0.230186
447722	0.230068
447724	0.230068
14806063	0.230025
196710	0.230025
155889187	0.22969
154704811	0.22969
5272663	0.229233
131876195	0.229141
92236380	0.229141
9562214	0.229141
53909434	0.229131
15729466	0.228798
54073031	0.228441
70682891	0.228404
451879	0.228321
3005948	0.228308
92924	0.228248
53791036	0.228233
100652	0.228212
11054122	0.228138
3007778	0.228032
6915703	0.228032
10494279	0.227918
137186166	0.227866
135398639	0.227622
3009328	0.227552
3009329	0.227507
16080049	0.227447
5274310	0.227414
3007911	0.227389
365914	0.227385
469867	0.227385
14702157	0.227303
455766	0.227285
6476965	0.227126
121486995	0.22705
5272658	0.226878
217704	0.226864
123134085	0.226586
159359	0.226586
92969927	0.226586
5271381	0.226586
3007123	0.226467
129291491	0.226465
22211360	0.226433
514172	0.226433
13845034	0.226298
21595512	0.226045
14286993	0.226024
21157833	0.226006
451393	0.225936
90663906	0.225854
70700658	0.225827
125460	0.225827
14777018	0.225803
13941599	0.225704
121487312	0.225578
10037425	0.225536
125924	0.225536
137214373	0.225419
10105820	0.225326
470053	0.225283
453112	0.225225
3005550	0.225022
21157388	0.224919
136892633	0.224873
136025160	0.224873
136017105	0.224873
136067613	0.224873
135440068	0.224873
135445713	0.224873
136892634	0.224873
3011904	0.224815
24822457	0.224791
53940462	0.224754
54401242	0.224632
6479249	0.22461
169016	0.224475
419564	0.224459
21144431	0.224459
137185205	0.224269
6334197	0.224265
3009782	0.224256
131876403	0.223969
270261	0.223969
138059441	0.223828
121006761	0.223653
136229440	0.22363
155290824	0.2236
5276954	0.223431
453829	0.223394
489877	0.223374
451581	0.223104
5271699	0.223029
136161656	0.22294
136218886	0.222484
13566112	0.221921
10879554	0.221615
21120430	0.221463
21348481	0.22142
24823119	0.221388
5272849	0.221321
135849075	0.221271
15104857	0.221215
135431813	0.221052
451516	0.22056
68012606	0.220011
135435173	0.22
5272654	0.21972
131698258	0.219573
5276642	0.219573
50312	0.219573
130583	0.219383
466022	0.219356
17756742	0.21931
3012549	0.219308
66608846	0.219239
6481831	0.219163
136119103	0.219151
503007	0.219006
472823	0.219006
102301571	0.218924
102531168	0.218915
466018	0.2181
90356982	0.218082
10494286	0.217997
5278749	0.217922
135538674	0.217912
10467582	0.217742
10778510	0.217597
44146603	0.217548
7059455	0.217393
5342744	0.217393
65062	0.217393
10802684	0.217392
121487333	0.216923
92243788	0.216923
3011895	0.216886
89661937	0.216856
135743990	0.216855
107769	0.216418
139026052	0.216418
3065115	0.216299
136084225	0.21627
134693227	0.216256
121487149	0.216224
5274689	0.216071
5271268	0.215952
21140827	0.215933
15954533	0.21592
121487370	0.215866
25182694	0.21584
131880518	0.215805
18632917	0.215787
9816617	0.215771
53853888	0.215291
20839343	0.215291
5272745	0.21522
135416725	0.2152
97119	0.215178
6481574	0.215136
121486946	0.215114
121486945	0.215114
454001	0.2151
14159102	0.215082
452057	0.215082
493440	0.215044
461148	0.214973
461149	0.214973
71352233	0.214941
53657227	0.214898
14310518	0.214764
479299	0.214701
3083166	0.214423
3005556	0.214407
15081828	0.214405
3011534	0.214356
477012	0.214349
100417	0.214325
139025306	0.214201
385457	0.214183
21592214	0.213913
155885413	0.2139
3080922	0.2139
92209277	0.2139
10469766	0.213753
21668257	0.213631
12150479	0.21357
139025046	0.213468
136041721	0.213467
3010387	0.213412
128451	0.213289
515104	0.213119
451826	0.213072
5271377	0.212992
5273749	0.212992
134694098	0.212818
12896821	0.212818
46875049	0.212818
16861	0.212818
59051498	0.212818
20285	0.212818
29980301	0.212818
22899176	0.212791
11426143	0.212744
471486	0.212703
54311365	0.212686
464392	0.212646
490622	0.212417
496427	0.212387
121487388	0.212334
22885208	0.212196
131858477	0.212025
131853148	0.212014
49784203	0.211993
6035	0.211896
7195999	0.211896
151790	0.211896
2729613	0.211896
90954505	0.211896
6603739	0.211896
131881061	0.211867
6595777	0.211786
96547	0.211786
6481835	0.211709
92236361	0.211584
21139599	0.21158
93982631	0.211533
71362645	0.211462
44462780	0.211342
473662	0.211173
473661	0.211173
54555880	0.21115
3012551	0.211111
482632	0.210904
146160877	0.210875
137239458	0.210875
195200	0.210778
350834	0.21071
135410347	0.210702
134229959	0.210613
439866	0.210557
4477522	0.210557
131864833	0.210523
352989	0.210523
3007126	0.21051
3012550	0.210454
15119214	0.210143
11140051	0.210127
469771	0.209857
14411349	0.209857
193188	0.209747
131885479	0.209744
107870	0.209525
121597152	0.209462
92237642	0.209462
135405922	0.209445
135400896	0.209428
136157781	0.209428
135623679	0.209428
136069427	0.209428
135398593	0.209428
3007847	0.209401
451828	0.209305
9948218	0.209294
96565	0.209153
255047	0.209153
92149401	0.209153
15217015	0.20882
135506203	0.20862
70385614	0.208429
54100215	0.208415
320414	0.208415
12151656	0.208379
33039	0.208343
46780621	0.208343
2783889	0.208343
13833666	0.208343
284240	0.208343
450772	0.208343
45357589	0.208343
9878109	0.208343
42104317	0.208343
469094	0.208251
483948	0.208176
137191441	0.208149
461537	0.208088
121487354	0.207982
14562096	0.207893
10870487	0.207847
5271817	0.207828
259345	0.207665
14842981	0.20743
89486753	0.207177
1468	0.207145
56968162	0.20709
97131	0.20709
67394311	0.20709
69078520	0.20709
14842998	0.206941
49784136	0.206788
499785	0.206688
86592812	0.206582
453994	0.206363
355900	0.206363
451847	0.206279
135616719	0.206071
14135555	0.2058
452445	0.2058
6478489	0.205609
3005945	0.205442
154705592	0.205376
121007158	0.205017
91668389	0.204982
138059440	0.204982
191091	0.204944
21140467	0.204933
475573	0.204878
452030	0.204799
71413190	0.204796
11043124	0.204631
10492996	0.204597
451849	0.204524
10544814	0.204485
287101	0.204485
451837	0.204445
54171947	0.20437
351993	0.20437
25139868	0.204254
90117986	0.204076
16072288	0.204018
16072289	0.204018
127258181	0.203982
14367012	0.203851
136415743	0.203803
71732377	0.203751
135434850	0.203573
181830	0.203507
156594917	0.203483
101510	0.203437
352991	0.203437
21117609	0.203437
[truncated: 4,791 more rows]

## Sheet: 5. EBV
cid	Probability of anti-EBV
70021591	0.50127
3080864	0.450335
449489	0.444969
90470199	0.437465
3010374	0.4313
21854256	0.429185
5232177	0.429098
10389132	0.42878
139025680	0.42878
507025	0.428374
6534309	0.428374
44829127	0.427371
21853094	0.427125
131884920	0.424894
196433	0.41993
21853097	0.417032
6509777	0.416448
10308889	0.415654
1549370	0.415194
15938965	0.415194
323498	0.413763
47002148	0.412439
189495	0.411875
193541	0.411409
3007133	0.409979
135398639	0.409675
3363163	0.408512
6913230	0.408512
446725	0.407979
46173764	0.407403
469861	0.407064
135600345	0.404435
439541	0.402893
6509778	0.402292
3011927	0.402292
139025108	0.401789
146158356	0.400223
513636	0.399323
10915407	0.399074
18643544	0.398794
644264	0.39879
34768	0.39879
1549371	0.39879
83862	0.39879
446048	0.39879
6083	0.39879
54235934	0.397767
25074416	0.396492
13994713	0.396322
125623	0.396322
513632	0.396015
124766	0.395878
14258187	0.395737
172916	0.394445
3012255	0.394423
139025050	0.393831
22848660	0.393689
71431203	0.39327
135398640	0.39293
5273977	0.392879
3007132	0.392675
12810881	0.391706
121486745	0.391607
5487206	0.391455
136791445	0.390904
93036	0.389854
3005965	0.389706
137191441	0.389492
131882742	0.38859
123789960	0.386652
477552	0.386382
3035986	0.386205
5099290	0.385169
10474045	0.384186
121216596	0.384169
481521	0.383609
3034646	0.381265
4269332	0.381265
131858473	0.380995
3009783	0.379856
16760025	0.37937
49866464	0.379158
86751178	0.378208
131884919	0.377831
575855	0.377183
13989306	0.377183
125691	0.377057
42552658	0.376011
42552656	0.376011
136272494	0.375428
90674669	0.375088
131858477	0.375033
191759	0.37503
3037684	0.374898
137090731	0.374746
3010386	0.373183
440142	0.372602
168120	0.37258
15289164	0.372422
72212336	0.372422
92271314	0.3724
6857539	0.3724
125494577	0.372159
97576	0.372108
5287975	0.372016
4369196	0.371921
71429365	0.371456
512718	0.371321
16728571	0.370994
470030	0.370927
131843075	0.370617
53657227	0.370585
71383199	0.370325
134501092	0.370305
161605	0.370245
136248813	0.370205
150973	0.370175
135517354	0.370007
68661802	0.369251
135618545	0.36886
9951889	0.367938
3013082	0.367523
444450	0.367464
131881813	0.366665
21676639	0.365924
3011534	0.365774
137287473	0.365481
13566115	0.365006
54206438	0.364705
20849148	0.364468
3000230	0.364357
45052555	0.363886
164580	0.363712
7264506	0.363582
23421209	0.363582
135398630	0.36344
515210	0.363404
9975088	0.363389
136259535	0.363324
135398596	0.363324
135398597	0.363163
135596592	0.363163
44199361	0.362464
3080922	0.362103
92209277	0.362103
155885413	0.362103
6338568	0.361927
3081384	0.361828
162367444	0.361672
5273514	0.36161
135804809	0.361444
512601	0.361386
15126147	0.361102
5271296	0.361063
163285485	0.361051
53777786	0.360826
135616719	0.360113
10021283	0.360007
137092996	0.359091
16133029	0.359083
54320536	0.358179
3010410	0.357627
194101	0.35742
136228650	0.35712
510969	0.357089
91809617	0.35685
21122981	0.356387
86592810	0.355356
18661222	0.355029
92231367	0.355029
23531406	0.354944
5276735	0.354831
136100249	0.354618
502241	0.354399
10405378	0.354366
492201	0.353961
6334737	0.353843
22867782	0.353656
49784137	0.35356
5274292	0.353532
1190	0.353261
122280	0.353261
73323	0.353261
13989283	0.3532
451371	0.3532
454142	0.353176
135457441	0.353145
129389389	0.353137
11728978	0.353124
23634773	0.35282
44151925	0.352724
46875339	0.352566
3010388	0.352566
92246571	0.352566
136248812	0.352521
3009937	0.352342
6992262	0.352261
3012258	0.352024
487685	0.351556
493223	0.351345
449584	0.351338
515111	0.351261
54148415	0.350832
156619778	0.350764
124254961	0.350764
118991702	0.350764
3011533	0.350421
16755631	0.350325
5273015	0.349936
3081390	0.349863
73353418	0.349836
21677555	0.349304
3080705	0.34913
131885191	0.348515
179629	0.348508
492561	0.347988
45039587	0.347659
97297	0.347659
25880707	0.347659
6419781	0.347659
135485495	0.347197
5276734	0.347041
88101259	0.346938
90663555	0.346492
131886803	0.346492
14237950	0.346466
6426626	0.346466
136025255	0.346384
107764	0.346338
23421442	0.345893
439424	0.345751
137019865	0.345469
4661673	0.345002
12071879	0.344823
6714006	0.344823
71444956	0.344783
137099057	0.344732
54017251	0.344684
135434784	0.344541
470024	0.344375
270861	0.344375
6858204	0.344071
131884918	0.343896
53724373	0.343836
21144622	0.343834
13989304	0.3434
156594202	0.343335
507024	0.343255
6534308	0.343255
5273004	0.343
260472	0.342652
51371334	0.342559
1272916	0.342559
511644	0.342559
6419973	0.342559
3007215	0.34214
6505368	0.342126
6439649	0.342126
134220	0.342126
3010090	0.341999
131880742	0.341745
512626	0.341691
3012551	0.341286
191215	0.341144
136229819	0.340817
511720	0.340536
137195841	0.340322
3007129	0.340157
42553033	0.339937
42553032	0.339937
71832128	0.339937
121487080	0.33984
101926865	0.339395
14409040	0.338841
515214	0.338749
89858725	0.338521
487684	0.338369
9883997	0.338361
3036471	0.338286
135398692	0.338093
513034	0.337855
139025114	0.337814
445093	0.337598
3036202	0.337463
65375	0.337413
121486770	0.337339
121486876	0.337033
131843750	0.33698
94136	0.336812
22803666	0.336812
7264507	0.336812
131858702	0.336463
22895138	0.336016
64979	0.335925
483947	0.33564
167800	0.33536
92021611	0.335347
131858474	0.334885
135783067	0.334734
3081517	0.334713
19362123	0.334163
71539358	0.334117
169295	0.333906
71401941	0.333729
3012249	0.333174
125496047	0.333007
135462526	0.332786
3012586	0.332731
189237	0.3327
49784203	0.332581
22814079	0.332488
101335356	0.332153
15279197	0.332138
29979263	0.332138
139026034	0.332138
511016	0.331942
91669385	0.331904
15938966	0.331809
121487311	0.331718
3013084	0.331705
77280370	0.331615
193604	0.331561
506145	0.331492
135405922	0.331466
3012254	0.33101
5271699	0.330958
453195	0.330791
136744872	0.330617
452412	0.33042
477551	0.330348
134520771	0.330223
14840825	0.330119
5271262	0.330078
3007125	0.329291
16721025	0.329111
131881061	0.328965
495012	0.328832
502238	0.328779
21117199	0.328668
118988859	0.328631
191008	0.328475
481520	0.328429
163285378	0.328296
129864	0.327992
3010825	0.327962
135554439	0.327754
470065	0.327147
6475823	0.327093
510968	0.327005
121228751	0.326977
11004885	0.326922
18658060	0.326911
16655024	0.326771
3246447	0.326763
1268108	0.326187
40496690	0.326187
51407982	0.326187
96621	0.326187
2729605	0.326187
7195996	0.326187
53983167	0.325928
6481577	0.325914
3006618	0.325429
513276	0.32539
137186166	0.325349
504751	0.325339
73351959	0.325217
90673800	0.325208
188276	0.325163
5279532	0.325108
56671903	0.325011
86645138	0.324998
453473	0.324111
21157436	0.324071
136119103	0.323995
446940	0.323747
23629091	0.323342
136260503	0.323138
135956774	0.322927
488242	0.322911
16395540	0.32288
5274286	0.322775
124296	0.322434
54285617	0.322434
5273519	0.322235
192785	0.322217
10716626	0.322092
131879863	0.3218
301080	0.3218
21765583	0.321715
137202792	0.321661
470049	0.321614
465094	0.321614
515212	0.321162
286012	0.321071
25049744	0.320701
454925	0.320676
5273016	0.320597
456401	0.320545
121487870	0.320426
136238529	0.320286
90476898	0.320205
3012550	0.319916
23260220	0.319764
71374245	0.319556
169938	0.319423
124317	0.319409
89486753	0.319254
137208277	0.319204
135398631	0.319204
137015000	0.319204
135407854	0.319151
137176604	0.319143
10067373	0.319042
3007221	0.318761
163320926	0.318602
92148590	0.318433
15954525	0.318433
44572473	0.318347
3358362	0.318279
44432644	0.318279
131885200	0.318234
139025115	0.318161
163284925	0.318042
459905	0.317989
512587	0.317989
137147094	0.31782
135464486	0.317474
121487313	0.317473
515107	0.317447
256105	0.317188
12358318	0.317188
56992563	0.317188
41211	0.317188
148033	0.317143
3012257	0.316682
453656	0.316626
131858703	0.316464
453997	0.316353
355902	0.316353
13205977	0.316246
53642991	0.316246
13146158	0.316137
137230633	0.316031
6474980	0.315863
512669	0.315639
6450926	0.315639
460316	0.315629
3006169	0.315294
92242775	0.315294
138375993	0.315271
137077003	0.315042
29921448	0.314856
92231363	0.314856
6478357	0.314805
18596452	0.31479
1838	0.314678
449599	0.314574
136217926	0.314533
121486927	0.314444
21855711	0.314363
97305099	0.314179
135398701	0.313874
453628	0.313644
656409	0.313614
44356940	0.313598
134694066	0.313598
93604123	0.313598
169662	0.313598
29982328	0.313598
12042143	0.313598
92845691	0.313598
14730263	0.313446
49784136	0.313429
135625234	0.31339
136927403	0.31339
135460966	0.31339
504747	0.313387
121486885	0.3132
132663	0.313125
196324	0.313061
9842606	0.312938
481518	0.312905
512727	0.312818
134067785	0.312799
92236361	0.312796
512130	0.312724
6858194	0.312446
5274366	0.312441
21069732	0.312424
21145448	0.31206
511015	0.311989
49822695	0.311885
472167	0.311862
6323540	0.311847
5698	0.311847
92249340	0.311835
21856771	0.311835
21140838	0.311781
129318779	0.311644
121487869	0.311615
71340951	0.311099
452263	0.311099
58696770	0.310996
13647253	0.310996
124297	0.310996
50313	0.310996
3012046	0.310959
150856	0.310837
6479208	0.310773
135405252	0.31073
68655403	0.310383
92252177	0.309828
53653696	0.309794
3011535	0.309615
10893330	0.309587
136682650	0.309551
136260091	0.309551
129395379	0.30952
12803302	0.30952
12803301	0.30952
56664677	0.309506
3009936	0.309314
163285120	0.309138
21121551	0.309056
453764	0.308996
10833407	0.308924
1778309	0.308568
135596618	0.308385
121487526	0.308249
49784438	0.308095
167821	0.307724
11825687	0.307723
18658061	0.307679
171490	0.307554
512329	0.307464
121486926	0.307451
18661221	0.30736
92230795	0.30736
3010387	0.307276
172915	0.307174
154701266	0.307171
156589112	0.307078
10381436	0.306816
14541353	0.306709
11461625	0.306699
499786	0.306581
135528754	0.306542
29921449	0.306401
11697766	0.306026
29982346	0.306026
45039581	0.306026
54109572	0.305865
11749237	0.30582
14803116	0.305787
14803115	0.305787
6481848	0.305778
6481847	0.305778
13375939	0.30577
135434782	0.305767
196471	0.305588
7058165	0.305517
3039710	0.305515
469447	0.305435
453996	0.305285
92279160	0.305285
3012248	0.305235
131880512	0.305147
374121	0.304874
101609	0.30473
133121258	0.304672
10317833	0.304672
126969944	0.304672
3012253	0.304637
92262645	0.3046
131858479	0.3046
71352076	0.304595
71410159	0.304594
3012252	0.304182
121218308	0.304173
470067	0.30416
3000770	0.30416
71309346	0.304127
121007158	0.303942
196459	0.303758
5279529	0.303612
135743934	0.303588
136232092	0.303541
121486895	0.303467
3087115	0.303449
101947567	0.303345
9885936	0.30329
121486830	0.303248
21117616	0.303175
117681056	0.303056
6398509	0.302949
71440751	0.302931
481523	0.302714
11290467	0.302694
471524	0.302653
5276642	0.30261
50312	0.30261
131698258	0.30261
6131	0.302369
124170	0.302369
165421	0.302321
21124427	0.302321
117064372	0.302282
7197058	0.302236
97445	0.302236
14408976	0.302197
15289165	0.302173
376366	0.302086
136257878	0.302073
150959	0.301566
123134085	0.301541
159359	0.301541
5271381	0.301541
92969927	0.301541
6443940	0.301362
46875292	0.301334
97186	0.301334
92266371	0.301273
131878800	0.301273
92266369	0.301273
86306492	0.301106
5274287	0.301004
14484797	0.300871
460317	0.300722
23519658	0.300465
44283163	0.300264
96544	0.300264
12939901	0.300264
7070208	0.300264
12939902	0.300264
2777912	0.300264
46783463	0.300264
10521478	0.300264
688019	0.300264
515099	0.300238
98854	0.300133
92247230	0.300133
21140449	0.300133
150983	0.299945
503109	0.299943
49784134	0.299933
135511168	0.299834
3036983	0.299775
136177058	0.299693
445132	0.29943
136238394	0.299426
174519	0.299362
71371786	0.299362
21151277	0.299171
121487889	0.299063
515102	0.299041
21854257	0.29903
98519907	0.29903
131883224	0.298925
137218720	0.298865
515100	0.298813
22827178	0.298737
86592812	0.298708
3007124	0.298548
490256	0.298464
54443874	0.298427
449405	0.298354
8642	0.298354
135567131	0.298293
14860269	0.298129
5273520	0.297808
453829	0.29774
77520394	0.297716
452986	0.297657
139592726	0.297588
137699081	0.297588
469441	0.297359
135511145	0.297267
486175	0.297112
89486751	0.296947
301081	0.296757
24773090	0.296757
10778362	0.296749
128656	0.296608
18645122	0.296586
131885345	0.296482
121487327	0.29638
90477183	0.296309
511990	0.296235
10660693	0.296174
450447	0.295908
10827042	0.295874
320720	0.295844
136250551	0.29582
14999718	0.295784
136217255	0.295563
136262592	0.295563
9862222	0.295505
5279534	0.295474
57375625	0.295429
10831407	0.295307
118796809	0.295293
136387048	0.295186
25632117	0.295001
65050	0.295001
57113422	0.295001
51571861	0.295001
156583186	0.294793
21089	0.294793
188319	0.294705
15217941	0.294705
3012564	0.294677
133458	0.294575
1362195	0.294432
7464993	0.294432
5343060	0.294432
286481	0.294432
7464989	0.294432
131846216	0.294359
196710	0.294355
14806063	0.294355
453657	0.294293
11812423	0.294195
121486900	0.294051
483946	0.293951
5272749	0.293945
57349456	0.29385
121487053	0.293679
492409	0.293671
131881293	0.293645
62898796	0.293503
5271960	0.293502
16094546	0.293492
9824370	0.293424
121219148	0.293371
10872387	0.293078
66608846	0.293072
138375992	0.293059
26974701	0.292884
137189782	0.292783
5274310	0.2927
12803287	0.292567
133135	0.29243
3007131	0.292172
92132221	0.292119
6451965	0.292119
134693185	0.292119
12873547	0.292119
11697484	0.292107
476466	0.292096
152488	0.292063
3003718	0.292032
460320	0.292027
22844922	0.292014
135464489	0.291835
124295	0.291719
5271380	0.291719
45484443	0.291719
21818173	0.291674
92243772	0.291674
3037739	0.291588
135509071	0.291584
3042985	0.291508
15119214	0.291433
451888	0.291227
135618603	0.29115
21625759	0.291131
5278280	0.291082
76973368	0.29096
42553079	0.290852
42553078	0.290852
6479249	0.290816
479691	0.290745
13711969	0.290665
3010355	0.290467
136030678	0.290399
136921544	0.290351
100795272	0.290336
135508096	0.290312
447069	0.290236
21145447	0.290179
516053	0.290179
121487314	0.290169
492559	0.290137
136643516	0.290101
121487134	0.289993
71371189	0.289925
69538220	0.28988
25157838	0.289731
6478358	0.289707
500918	0.289696
23391556	0.289676
13009730	0.289635
3901376	0.289635
92279507	0.289588
92279509	0.289588
57223801	0.289588
191942	0.289579
92246004	0.289477
3010384	0.289477
67331935	0.289359
10764891	0.289354
139086336	0.289191
10687208	0.289002
76974600	0.288974
472814	0.288967
6475236	0.288967
56987376	0.288747
11232828	0.288696
586070	0.288696
121217034	0.28868
91668475	0.288592
121217181	0.288499
515103	0.288246
452277	0.288235
3010291	0.288188
42637091	0.288174
44250004	0.288048
22787949	0.28795
136257920	0.2879
12067880	0.287689
159480	0.287689
71315456	0.287666
139024324	0.287666
136415743	0.287581
3005556	0.28758
92970665	0.287537
11501773	0.287311
5272752	0.287255
121228750	0.287253
10019998	0.287049
5289307	0.286936
17754151	0.286936
6481845	0.286834
71380931	0.286804
499785	0.286773
3011899	0.28676
135446908	0.286644
15277828	0.286608
6480473	0.286553
481517	0.286527
6595777	0.286479
96547	0.286479
92271256	0.286357
121216763	0.286349
54515638	0.286346
130209	0.286316
128866	0.286285
53774252	0.286262
6451079	0.286091
6450904	0.286036
50989698	0.286036
135823809	0.285958
18653297	0.28578
3037666	0.285658
53963604	0.285657
5279533	0.285572
13830104	0.28554
453994	0.285346
355900	0.285346
12799571	0.285307
14367026	0.285271
466022	0.285231
156588741	0.285214
131878154	0.285086
121217573	0.285086
135538725	0.284667
121487118	0.284645
131877226	0.284632
14430355	0.28456
331904	0.28456
3005966	0.284551
10019708	0.284503
472638	0.284409
472656	0.284409
125508952	0.28434
71421156	0.284277
135526591	0.284221
136270978	0.284203
92236341	0.284105
189213	0.284069
3063029	0.283985
139025196	0.283846
482632	0.2835
137185205	0.283356
3007218	0.283289
6454581	0.28325
25113134	0.283067
444919	0.283067
9700	0.283067
23518344	0.282913
11173824	0.282822
7308567	0.282778
134481	0.282778
14603759	0.282773
163203168	0.282765
11057044	0.282708
121013684	0.282708
5270713	0.282693
455763	0.282677
21140106	0.282668
21826754	0.282663
92252368	0.282663
490630	0.28257
121221202	0.282436
73442717	0.282353
92230799	0.282353
3012247	0.282313
136265295	0.282267
54471624	0.282226
324452	0.282174
54101612	0.282135
14803093	0.282135
10220985	0.282135
118989478	0.282135
54101611	0.282135
6441200	0.282135
18397420	0.282087
126505	0.282087
488243	0.282069
92233380	0.281966
131881445	0.281966
11747467	0.281696
131876194	0.281681
135538690	0.281626
456570	0.281604
6332463	0.281467
53965369	0.281303
146066	0.281303
13846336	0.281216
136842757	0.281197
581037	0.281078
455227	0.281051
54089955	0.280971
453193	0.280941
453194	0.280941
3036587	0.2809
10689555	0.280772
76973833	0.280692
160418	0.280682
101685599	0.280647
53463804	0.28064
196709	0.28064
14408979	0.280599
3045029	0.280575
21116192	0.280562
451567	0.280562
121487445	0.280464
3007127	0.280408
98801	0.280357
5289071	0.280247
5273512	0.280197
21829242	0.280056
486177	0.28001
71302904	0.279857
21627889	0.279828
3055694	0.279777
3080744	0.279717
451454	0.279663
483941	0.279658
15729466	0.279645
21125843	0.279519
163203169	0.27941
53856507	0.279401
22793986	0.279358
3011924	0.27933
92247166	0.279276
287302	0.279276
324310	0.279178
481519	0.279112
131848792	0.27911
131858771	0.279061
167350	0.278891
90488943	0.27888
73265308	0.27888
6602111	0.27888
13009312	0.27888
92132157	0.27888
147569	0.27888
15104850	0.278619
59035043	0.278324
5496661	0.278311
66931238	0.278285
5270803	0.278197
121487090	0.278133
240186	0.278098
7124539	0.278098
69078418	0.278098
136260090	0.278009
135462273	0.277965
54237496	0.277958
45052491	0.277958
448782	0.277958
60074498	0.277935
54213197	0.277924
46846348	0.277805
6483432	0.277572
25075887	0.277246
293725	0.277246
10065192	0.277192
92264741	0.277192
3007224	0.277134
490432	0.277095
136732747	0.277078
135531791	0.277078
136732749	0.277078
135497035	0.277078
121487087	0.277024
46846349	0.276979
483938	0.276968
9903172	0.276926
131880734	0.276859
21140290	0.276811
510948	0.276778
121487106	0.276596
13375937	0.276545
15742005	0.276337
19385342	0.276337
12795836	0.276159
91494	0.276159
7072776	0.276159
2817368	0.276159
7076047	0.276159
7072774	0.276159
57105083	0.276112
21732848	0.275985
89486819	0.275963
479303	0.275917
10106801	0.275904
71346314	0.275904
6481567	0.27575
91668407	0.275746
502232	0.275667
444281	0.275589
71775556	0.275577
154731285	0.275559
132842	0.275545
515211	0.275399
44124071	0.275319
3002157	0.275299
54069128	0.275282
3012256	0.275277
121217776	0.275238
451372	0.275206
23519663	0.275197
451456	0.275143
533841	0.275143
92263298	0.275143
92236670	0.275055
494096	0.275055
21677361	0.275053
5272747	0.275038
5279530	0.274998
492197	0.274996
452990	0.274979
22792111	0.274947
12097724	0.274945
162011	0.274905
451448	0.274905
137128754	0.27485
42637093	0.274823
5273510	0.274744
10859911	0.274732
135464488	0.274688
135511167	0.274688
131708567	0.274654
126970070	0.274557
68768358	0.274557
22791353	0.274533
131845437	0.274465
121486742	0.274447
15928623	0.274427
6030	0.274412
452988	0.274395
17571993	0.274371
133688189	0.274371
124507746	0.274371
7048664	0.274371
688477	0.274371
44629858	0.274371
54336181	0.274293
137218731	0.274144
54446036	0.274127
470801	0.274053
510979	0.274046
10378169	0.274013
24823117	0.273965
66802809	0.273901
135856438	0.273891
183205	0.273884
183239	0.273884
125224	0.27383
265574	0.27383
92236137	0.27383
92236135	0.27383
131846804	0.27383
511017	0.273803
5272750	0.273749
440429	0.273741
6398342	0.273633
3005959	0.273632
10015599	0.273551
76974604	0.273522
122650	0.273492
452962	0.273492
54518623	0.273485
133609839	0.273484
71374323	0.273477
130583	0.273462
6913097	0.273379
101335355	0.273194
20722666	0.273194
23519664	0.273123
477850	0.273108
3246335	0.273102
3012227	0.27298
512717	0.272964
10266554	0.272861
136270374	0.272829
21677217	0.272798
73514	0.272798
6713638	0.272798
4127885	0.272798
92236327	0.272798
53792010	0.27277
86592813	0.272712
118294346	0.272633
21145446	0.272604
3012251	0.272585
19698912	0.272585
138058736	0.272491
137699191	0.272491
146160048	0.272491
131885779	0.272482
469868	0.272475
365913	0.272475
53781503	0.272471
10037499	0.272415
56995133	0.272415
29942411	0.272415
134694166	0.272415
59859763	0.272415
67419448	0.272415
191626	0.272388
67785067	0.272373
69906675	0.272324
453474	0.272323
118026092	0.272286
25185460	0.272259
129317616	0.272259
132283239	0.272259
137795695	0.272259
503020	0.272256
154705095	0.272246
136065590	0.272243
135437126	0.272243
121006411	0.272147
136706893	0.272146
25074417	0.27214
7269430	0.272133
2802520	0.272133
454001	0.272102
56961027	0.272073
10424498	0.272041
5273490	0.272025
121006623	0.271993
121219169	0.271833
131883271	0.271808
3005953	0.2718
102063598	0.271783
101627711	0.27177
500247	0.271705
92270653	0.271705
90469779	0.271639
71627217	0.271639
11725011	0.271619
22859299	0.271589
10892274	0.271523
6334744	0.271486
92236348	0.271481
11832583	0.271322
14885927	0.271276
54260440	0.271262
512286	0.271259
9840777	0.271206
14326905	0.271206
10615718	0.271092
12939904	0.271092
12097726	0.271091
135602220	0.270968
90673795	0.270894
21677364	0.27085
92237996	0.27079
453641	0.270744
3007128	0.270713
511719	0.270694
11034553	0.270683
7075232	0.270665
152475	0.270621
121006760	0.270549
136138664	0.270518
54489690	0.270496
45039507	0.27048
23519677	0.270468
125382	0.270439
136353600	0.270339
163285434	0.270329
152521	0.270216
510982	0.270172
510971	0.270159
92236502	0.269928
92236504	0.269928
11953391	0.269928
10244806	0.269928
260471	0.269928
96124	0.269902
92229496	0.269902
3012250	0.269887
6915711	0.269887
7271997	0.269887
7271995	0.269887
56985150	0.269887
3009860	0.269864
483939	0.269843
92253117	0.269811
57358089	0.269811
477851	0.269787
72296	0.269779
146156886	0.269779
125507539	0.269766
512604	0.269694
5273975	0.269658
54357487	0.269624
24823119	0.269582
5271259	0.269523
92236380	0.269497
131876195	0.269497
9562214	0.269497
3006523	0.26941
3006522	0.26941
133589974	0.269357
71752893	0.269247
191803	0.269206
135788877	0.269178
71406419	0.269141
24011706	0.269131
139025758	0.26908
13830101	0.269052
510973	0.269032
10541096	0.269008
460321	0.268981
495959	0.268947
69459168	0.268907
126455407	0.268898
42637090	0.268898
127263478	0.268898
21769748	0.268881
71303902	0.268817
21117205	0.268797
129371096	0.268797
90673794	0.268769
481515	0.268706
130060	0.268594
22880806	0.268493
6450981	0.26835
6438459	0.26835
14367012	0.268227
460315	0.268202
136921547	0.268189
134693227	0.268175
92221236	0.268175
92221238	0.268175
21829243	0.268095
121217040	0.268066
260138	0.268066
510970	0.268032
137128751	0.26797
21732849	0.26793
93258	0.267865
125654	0.267865
9925859	0.267829
6450918	0.267656
18533908	0.267653
135771852	0.267625
135771870	0.267529
92233609	0.26741
161884	0.26741
424081	0.26741
456109	0.267373
23541118	0.267354
21140827	0.267281
137198957	0.267266
44378767	0.267169
101544	0.267055
22803042	0.267055
454141	0.267022
454140	0.267022
68012606	0.267014
9992803	0.266999
46500308	0.266999
3036443	0.266999
26501901	0.266999
12517389	0.266999
9859433	0.266974
134229959	0.266913
129674064	0.266886
137699364	0.266854
121006824	0.266799
67327211	0.266737
21124038	0.266703
92150012	0.266614
108175	0.266614
128359	0.266564
471523	0.266459
100932477	0.266452
54343230	0.266377
69908761	0.266371
453631	0.266339
6482628	0.266285
92301827	0.266285
22841776	0.266284
12787947	0.26628
156594850	0.266157
135788892	0.266013
452057	0.265977
14159102	0.265977
1260547	0.265802
58078371	0.265714
6454582	0.265702
1250152	0.265631
685002	0.265631
10805757	0.265631
9797212	0.265631
451862	0.265538
498376	0.265523
171255	0.265516
15118691	0.265515
92241033	0.265515
5278546	0.265499
77844503	0.265486
419564	0.265453
21144431	0.265453
3005550	0.265385
14310518	0.26538
5271018	0.265323
14539818	0.265317
510978	0.265306
71414969	0.265257
24769759	0.265223
25051804	0.265223
145705996	0.265223
156594205	0.265223
6483689	0.265136
135536008	0.265114
15928607	0.265099
10423457	0.265094
6483431	0.265073
138114911	0.265073
7043952	0.264976
6595184	0.264976
121487874	0.264884
53695341	0.264863
23112639	0.264811
54531450	0.264811
492117	0.264797
492116	0.264797
15172876	0.264772
129317836	0.264704
132283238	0.264704
11514721	0.264704
10249185	0.264704
10778286	0.264674
136238399	0.264573
53322921	0.264516
89998825	0.264486
10778285	0.264486
132073959	0.264486
23421206	0.264449
57369656	0.264449
126968625	0.264449
23421207	0.264401
54437788	0.264328
10848780	0.264295
129009840	0.264251
3037046	0.264243
53744408	0.264158
71422792	0.264138
121486973	0.264072
10660621	0.264015
11783210	0.263924
126961829	0.263876
150625	0.263682
504745	0.263655
54432316	0.263634
215491	0.2636
42601468	0.263552
137077014	0.263546
12315238	0.263524
14030964	0.263524
64978	0.263524
188216	0.263516
54526893	0.263514
135991622	0.263513
3036488	0.263512
9794951	0.263507
5273008	0.263425
21140467	0.263409
131885190	0.263403
432973	0.263403
121487089	0.263374
154701265	0.263343
121220862	0.263318
6483433	0.2633
44290695	0.263299
15037959	0.263269
217704	0.263106
512676	0.263002
86288424	0.262988
3006525	0.26298
92245372	0.26298
135538691	0.262975
14376122	0.262941
395997	0.262892
9837879	0.262884
15081828	0.262881
25075886	0.262837
56851256	0.26278
22875360	0.262778
135449322	0.262767
54256130	0.262724
149101	0.262716
96851	0.262628
57324057	0.262628
11278700	0.262626
54501668	0.262608
135815016	0.262587
135531159	0.262587
512657	0.262578
151790	0.262555
15979428	0.262553
451391	0.262551
70587122	0.262532
9903844	0.262417
5273484	0.26241
137077012	0.262384
11130655	0.26235
124407177	0.26235
124407178	0.26235
14702157	0.262311
90117986	0.262104
6450919	0.262092
14498611	0.262083
511984	0.262072
459911	0.262028
3005548	0.261998
512675	0.261993
515218	0.261978
156594562	0.261951
121487353	0.261896
13051253	0.261896
90954505	0.261859
131887892	0.261804
102155963	0.2618
71539312	0.261724
127260544	0.261697
71407380	0.261697
121487527	0.26167
11779021	0.261662
451585	0.261659
14502994	0.261659
151360	0.261654
183242	0.261501
287709	0.261499
76974063	0.261488
135888863	0.261398
135722152	0.261398
5278277	0.26137
22880808	0.261358
121487290	0.261334
356796	0.261319
5271016	0.261313
13566112	0.261312
481524	0.26128
5287590	0.261262
451481	0.261235
86145	0.261235
21116189	0.261235
129388670	0.261226
133332	0.261195
20839332	0.261195
6439549	0.261195
136217886	0.261147
14989468	0.26114
134694098	0.261135
20285	0.261135
12896821	0.261135
16861	0.261135
29980301	0.261135
46875049	0.261135
59051498	0.261135
90673985	0.261127
446164	0.261091
22880825	0.261065
69527463	0.261025
481078	0.260907
124923	0.260907
3009858	0.260836
360646	0.260836
493225	0.260836
6438736	0.260812
21140890	0.260799
135414113	0.260784
130763680	0.26072
503813	0.260692
10092318	0.260683
10402220	0.260613
488241	0.260523
3010383	0.260513
154809499	0.26049
135434129	0.26042
121010102	0.260417
167956	0.260343
67785162	0.260216
352979	0.260213
68854303	0.260213
188325	0.260213
131850900	0.260172
3009859	0.260132
6918133	0.260019
16080049	0.259992
13205980	0.259865
124396689	0.259865
13205979	0.259865
53794255	0.259865
193091	0.25983
71354368	0.259818
71342993	0.259818
512134	0.259802
92264929	0.259802
333596	0.259802
9797705	0.259763
71621351	0.259759
11174347	0.259754
15955042	0.259707
188575	0.259573
3010606	0.259537
121606027	0.259517
91046277	0.259511
121487358	0.259418
131885132	0.259365
6333525	0.259352
121486901	0.259335
92236279	0.259307
21139854	0.259307
451494	0.259193
54068544	0.259138
276156	0.259138
57369657	0.2591
101543	0.2591
124466	0.259089
9795336	0.259048
7458588	0.259036
7058183	0.259036
506489	0.258913
121487452	0.258913
136195916	0.258893
66535	0.258835
57047691	0.258835
12308857	0.258835
3011929	0.258798
6509780	0.258798
484808	0.258755
15276896	0.258716
6779534	0.25871
118992169	0.258695
135443291	0.258686
500026	0.258613
45480523	0.258394
6603694	0.258254
98567	0.258254
92253113	0.258254
44438827	0.258219
135440620	0.258206
150669	0.258196
20841954	0.25811
137628662	0.258072
191808	0.25807
121486764	0.257969
71391798	0.25796
131856440	0.257958
136226295	0.257901
136267259	0.257895
5272743	0.257865
490433	0.257847
490684	0.257847
18719641	0.257822
135482571	0.257812
3082267	0.257785
482589	0.257776
21140595	0.257775
137214373	0.25776
121486824	0.25776
44560429	0.257662
121486933	0.257638
22875362	0.257637
15742022	0.25754
136265296	0.25746
453762	0.25746
121487433	0.257439
137128749	0.257362
15118681	0.257308
45052344	0.257132
10467778	0.257055
3006622	0.257055
5272753	0.256937
121487373	0.256896
6603739	0.256892
7195999	0.256892
2729613	0.256892
96545	0.256737
481522	0.256664
71421157	0.256604
514803	0.256597
125494351	0.256551
2757012	0.256547
440416	0.256541
13845302	0.256497
97119	0.256495
135783064	0.256433
121008097	0.256343
22875361	0.256324
9921551	0.256284
451890	0.256284
492408	0.256272
270503	0.256254
92161781	0.256254
21668259	0.256251
10108316	0.256218
101254702	0.256204
107502	0.256188
124428631	0.256188
27191376	0.256188
45039580	0.256188
29982343	0.256188
92132205	0.256188
14775452	0.256147
5276957	0.255995
10828395	0.255958
92258444	0.255958
76844804	0.255923
137160593	0.255923
6560416	0.255897
155906019	0.255886
131708761	0.255879
510983	0.255871
10017261	0.255871
124156	0.255871
481530	0.255852
92246511	0.255815
92246512	0.255815
9543506	0.255815
29243	0.255815
76966528	0.255815
510947	0.255788
100997305	0.255783
5272754	0.255781
512605	0.255683
6479209	0.255683
150628	0.255655
137099063	0.255651
444892	0.255639
95166384	0.255636
46948803	0.255636
131858139	0.255601
156594861	0.255575
512330	0.255552
131853716	0.255511
3005964	0.255501
10125531	0.255447
124561689	0.255447
54531183	0.255447
5273012	0.255446
6482482	0.255446
124379	0.255446
21592214	0.255445
6440103	0.25541
5342881	0.255378
131874103	0.255378
7068779	0.255378
7256363	0.255378
1254895	0.255378
50987963	0.255378
24867503	0.255378
11358266	0.255273
131852022	0.255217
121486815	0.255212
71262374	0.255193
65399	0.255193
44400589	0.255193
515217	0.25519
121487074	0.255163
137139937	0.25509
23519652	0.255088
16076142	0.25504
282734	0.255013
9838543	0.255005
71314827	0.255005
16749579	0.255005
92253016	0.255005
92186	0.255005
40507260	0.255005
29933576	0.255005
512658	0.254968
53837746	0.254957
338571	0.254878
76973629	0.254868
14999717	0.254817
44281962	0.254793
121486765	0.254785
477012	0.254743
9973143	0.254741
3005961	0.254723
22880800	0.254687
102339225	0.254632
125650	0.254596
5274367	0.254592
139025305	0.254563
3035760	0.25451
121217041	0.254497
54010782	0.254429
135596626	0.25439
3037189	0.25437
155899230	0.25437
89915057	0.25437
22880803	0.254301
71303972	0.25429
90673699	0.25426
155395	0.254102
476449	0.254088
118034228	0.254047
15931427	0.254017
135506203	0.254007
449392	0.253962
3392033	0.253962
21815879	0.253945
188257	0.253944
46941505	0.253944
92294440	0.253944
92294441	0.253944
15276861	0.253935
136236455	0.25389
10380149	0.253866
149094	0.253813
131843751	0.25381
92021270	0.253747
44633776	0.253747
481527	0.253738
6561296	0.253687
7075199	0.253687
7116198	0.253687
488239	0.253639
15485095	0.25361
11957910	0.253594
3005949	0.253509
9950702	0.253473
490625	0.25345
21828331	0.253415
17756742	0.253376
98911	0.253358
167994	0.253334
490040	0.253334
3010354	0.253271
488240	0.253253
13965967	0.253183
12313774	0.253142
92751	0.253142
6478372	0.253125
53816764	0.253078
451876	0.253021
71422332	0.252953
90176383	0.252918
15036533	0.252918
57097210	0.252918
5274204	0.252849
481083	0.252791
481081	0.252791
71366478	0.252734
54428325	0.252705
3005947	0.252669
3012549	0.252625
172392	0.252621
5276641	0.252621
3006170	0.25258
92236337	0.25258
10019125	0.252561
93476651	0.252561
121007874	0.252549
160067	0.252531
10563947	0.252489
121487512	0.252451
511670	0.252451
92243975	0.252354
121006658	0.252331
71347840	0.252283
3010352	0.25227
11119723	0.252205
456513	0.252205
484832	0.252187
3000501	0.252187
456259	0.252187
71348719	0.252185
121486991	0.252185
121217563	0.252157
77282269	0.252156
140252620	0.252112
117590597	0.252101
273017	0.252074
3004988	0.252067
121012732	0.252037
301046	0.251898
21139656	0.251848
99681	0.25181
131882910	0.25181
92144824	0.25181
3005555	0.251789
121487127	0.251744
374116	0.251744
121487124	0.251744
488249	0.251744
131876227	0.251739
136752832	0.251737
136081429	0.251737
67709179	0.251715
22880809	0.251702
121487525	0.251656
20871287	0.251643
14630104	0.251568
470053	0.251514
137139924	0.25151
483948	0.251506
11346228	0.251484
125014	0.251443
504740	0.251424
14978	0.251375
92209900	0.251375
46875748	0.251375
3007220	0.251375
515219	0.25136
121486817	0.251357
15590161	0.251251
196788	0.251105
13630026	0.251099
88518334	0.251072
189898	0.251012
131857684	0.251012
53965194	0.250993
21139624	0.250993
3005553	0.25099
101335354	0.250979
123674	0.250836
13989343	0.250794
121487380	0.250759
46926326	0.250748
57372617	0.250742
89299280	0.250732
510574	0.250724
14367015	0.250692
14367014	0.250692
514805	0.25065
278404	0.25063
150626	0.250622
101508	0.250573
3080715	0.250573
489849	0.250549
154705590	0.250543
10588021	0.250539
10588022	0.250539
504736	0.250478
507023	0.250388
6534307	0.250388
126704	0.250357
469184	0.250357
10515947	0.250211
21854430	0.250151
54402739	0.250148
131846544	0.250144
131878861	0.250141
95730862	0.250075
136236459	0.250068
15168256	0.250047
510972	0.250026
129009617	0.250007
76973399	0.250007
135496375	0.249988
54339089	0.249923
22880824	0.249918
46705354	0.24991
90952817	0.249879
100551	0.249829
135627630	0.249827
59180612	0.249801
160751	0.249791
57216635	0.249791
15450711	0.249791
163199084	0.249791
498021	0.24977
121487130	0.24977
121487126	0.24977
3005950	0.249685
21456083	0.249685
20832934	0.249648
135452524	0.249648
135438607	0.249648
6573504	0.249642
122220071	0.24963
121006820	0.249611
21141083	0.249583
65063	0.24958
121216429	0.249578
513870	0.24954
176869	0.249537
14842981	0.24952
68517003	0.249487
5287614	0.249401
676166	0.249362
3034423	0.249362
6595185	0.249362
11507479	0.249362
452265	0.249355
136434268	0.249346
92242767	0.249313
266348	0.249313
11723585	0.249299
15609009	0.249242
136826947	0.249232
135622951	0.249232
135627705	0.249232
136065188	0.249232
135933068	0.249232
135465599	0.249232
136062166	0.249232
15160057	0.24923
490392	0.249222
135398727	0.249212
136134225	0.249212
136847919	0.249212
86751121	0.249183
477875	0.249182
59628352	0.249146
511014	0.249121
516084	0.249074
516079	0.249074
15403938	0.249059
15931300	0.249056
121486851	0.249018
136734354	0.249015
146157777	0.248994
92221399	0.248994
92221397	0.248994
65086	0.248994
12907243	0.248988
47751	0.248988
134714751	0.248988
44629846	0.248988
45357134	0.248988
1265902	0.248988
54424807	0.248881
139026027	0.248849
57369201	0.248849
15104857	0.248834
20600569	0.248822
5271377	0.248814
5273749	0.248814
485376	0.248807
13041867	0.24876
13566110	0.248742
92132405	0.248735
69626224	0.248735
11778706	0.248735
360644	0.248707
21157388	0.248651
5274169	0.248599
14530807	0.248586
136707617	0.248568
6438371	0.248564
6440124	0.248564
150201	0.248564
135959544	0.248558
3007066	0.248548
5461897	0.248518
131858302	0.248518
136633725	0.248498
5272748	0.248476
25231309	0.248474
478561	0.248464
171185	0.248446
92266931	0.248446
10040433	0.248383
131875471	0.248373
[truncated: 5,241 more rows]

## Sheet: 6. HIV
cid	Probability of anti-HIV
451380	0.988881
451378	0.984806
147648	0.984806
71347466	0.9826
390215	0.980496
20057102	0.980496
64986	0.980496
71316009	0.975349
121486937	0.973327
453641	0.97262
3010797	0.970879
466400	0.969875
71262374	0.968662
44400589	0.968662
44593585	0.968274
11043760	0.966094
263976	0.965828
14018268	0.965828
488949	0.965828
121486894	0.963972
131708761	0.963554
56846050	0.962243
51346748	0.960595
451515	0.960595
5726	0.960595
455007	0.960595
16398721	0.960595
3246700	0.960595
49849901	0.957175
513206	0.946781
369492	0.946555
511981	0.946555
365526	0.946555
469699	0.946555
6915817	0.946555
163285353	0.946512
136205846	0.946512
455661	0.944894
3002157	0.944716
146156886	0.94429
476450	0.943965
137184934	0.941729
91872665	0.941251
135538685	0.940533
135742598	0.937994
136219928	0.937994
135546504	0.937994
135502924	0.937994
136217872	0.937994
137303707	0.937994
14842998	0.937354
71313574	0.936178
453830	0.934864
136232982	0.933729
136219930	0.933729
471524	0.933295
119025583	0.930479
72251	0.928713
676805	0.928713
451961	0.927307
460315	0.926152
451394	0.91903
118796809	0.91205
10775595	0.9059
727961	0.900306
453465	0.900306
5155	0.900306
451572	0.896656
471523	0.89455
121486995	0.889465
15342951	0.88919
6327751	0.88919
6713933	0.88919
3010400	0.884553
392120	0.88377
101644650	0.882622
11042603	0.881115
464404	0.881014
3792400	0.878358
1620177	0.878358
10013690	0.878358
255105	0.877776
357072	0.877776
127256358	0.870996
44630569	0.869171
451565	0.867443
14409043	0.867443
122650	0.861542
452962	0.861542
72182	0.86139
135459781	0.856057
135455558	0.856057
479303	0.851954
121219148	0.851247
124301793	0.850675
228966	0.850675
476448	0.850244
469090	0.847441
469074	0.847418
509188	0.84524
469089	0.843934
121486938	0.842209
452080	0.837066
16057990	0.837066
3010352	0.836831
71302904	0.830381
453027	0.827272
513632	0.82578
136248812	0.822508
121007158	0.82247
477012	0.81751
495537	0.811663
72217	0.805646
22860550	0.805539
453821	0.801622
136768581	0.800598
22880809	0.799892
6475823	0.794372
14409040	0.784863
469861	0.783177
15124187	0.778561
15277413	0.778096
476438	0.777599
513477	0.77738
482632	0.776362
137628662	0.776183
370629	0.775786
10704791	0.775786
10966430	0.773587
476460	0.772041
3012227	0.770014
512727	0.766056
124565863	0.76434
58451159	0.76434
45074619	0.763309
451581	0.7632
21147325	0.762336
136248813	0.761393
14237009	0.759011
3000254	0.757545
3948320	0.757545
5232177	0.756028
125382	0.752736
58025055	0.752197
3008900	0.75211
3008896	0.749371
148033	0.748954
131853148	0.748638
135504147	0.748623
24823117	0.748062
121486909	0.747542
9921121	0.747067
135962086	0.743753
3010825	0.74295
42601468	0.742409
14777018	0.738061
67327211	0.734289
125544	0.730399
3010354	0.728876
3045029	0.728537
135442248	0.727402
191626	0.724589
464363	0.72274
476458	0.720859
5287975	0.720675
398256	0.718063
451371	0.716476
13989283	0.716476
21140827	0.716028
54180064	0.715203
54561889	0.714747
453663	0.714224
454925	0.713017
477014	0.712595
121487112	0.712595
3035490	0.710894
135509071	0.710872
14630104	0.70882
121487312	0.708371
15938965	0.706331
1549370	0.706331
476465	0.704735
22880808	0.70469
145705996	0.703877
25051804	0.703877
24769759	0.703877
489578	0.701316
121486936	0.699557
121486927	0.699014
9861413	0.695789
452281	0.69577
13989061	0.694663
13989062	0.694663
533841	0.694614
451456	0.694614
92263298	0.694614
471865	0.694252
6531437	0.694252
135462526	0.693841
21853094	0.693769
451377	0.692243
5272826	0.691151
3011745	0.690558
44331156	0.690558
451852	0.690157
121486876	0.689323
451963	0.688593
451554	0.686242
595375	0.683774
67785162	0.683111
482589	0.68257
14485380	0.681764
72201	0.681764
92233562	0.681632
121487559	0.680234
121486945	0.67815
121486946	0.67815
125508952	0.677413
513636	0.676524
23421209	0.676429
7264506	0.676429
23519652	0.676178
15124185	0.675668
476449	0.675431
3011894	0.674655
131881064	0.673814
92247204	0.673814
451914	0.673164
493440	0.672054
129893514	0.670189
453628	0.668467
44294571	0.667066
95166384	0.664165
46948803	0.664165
323498	0.662661
451383	0.662261
5273969	0.660704
504749	0.659655
134364	0.6596
469088	0.656146
451889	0.655891
122110	0.655891
509185	0.655891
12852	0.653564
477852	0.651853
453662	0.651608
451964	0.651346
3246447	0.650537
92980960	0.649336
125460	0.649336
70700658	0.649336
86309292	0.648784
86309091	0.648784
1932	0.648784
95121	0.647611
136186017	0.644518
135435044	0.644518
46741359	0.641839
469792	0.641113
452682	0.640825
21821295	0.640316
499785	0.640137
3001262	0.640107
356796	0.640003
510575	0.639797
473662	0.637946
473661	0.637946
16094546	0.637889
90952817	0.637655
453461	0.636665
509186	0.636665
509184	0.636665
488924	0.636617
476439	0.635995
56664677	0.635264
14862324	0.633486
25197	0.630162
60140908	0.630162
515328	0.630162
240980	0.630162
3037684	0.62593
131885345	0.625895
3010826	0.623634
92273085	0.623634
58078371	0.622135
46173764	0.618958
3011900	0.618374
464392	0.61738
9835398	0.616631
3011893	0.616631
22677568	0.616506
9921097	0.616506
121486830	0.615845
135538696	0.61523
374108	0.613854
9900146	0.613854
453201	0.613313
14409039	0.612187
452061	0.612187
476466	0.611766
69538220	0.611198
121486916	0.610475
101947567	0.609559
152488	0.609521
3081390	0.609508
121010087	0.608954
268420	0.608787
64975	0.608787
672230	0.608787
14135553	0.608658
124428635	0.608658
92918	0.608658
97000	0.608658
7282382	0.608658
446940	0.608494
3007221	0.604681
49866464	0.603878
509189	0.601171
483931	0.600078
163947	0.599917
484807	0.59986
461537	0.598975
100652	0.59788
121487533	0.597661
135398701	0.597641
512286	0.597443
131884920	0.596324
3011250	0.596257
14702157	0.595372
510973	0.595004
6475470	0.595
6479205	0.594606
131858703	0.591476
71539360	0.590695
14352039	0.590463
67331935	0.590362
495959	0.590282
451479	0.588882
14632481	0.588882
452767	0.588184
15693167	0.588114
512626	0.587499
452128	0.587118
135431813	0.584743
92246571	0.583575
46875339	0.583575
3010388	0.583575
4612204	0.582508
451374	0.582508
454132	0.581794
135482132	0.581234
136176852	0.580836
512725	0.580704
14430336	0.579966
10517080	0.578535
451915	0.57843
15953881	0.57843
22859454	0.577984
131879085	0.577012
12777828	0.575866
137230682	0.575841
10945668	0.57538
105116	0.57538
192785	0.574575
451960	0.574384
455217	0.572383
9951889	0.572351
500305	0.571527
390868	0.571527
135538694	0.571314
451822	0.571296
6450906	0.571296
10198304	0.571035
13993514	0.571035
124766	0.570507
121486824	0.570414
77844503	0.569343
475379	0.569163
15051913	0.569113
481515	0.568133
137195854	0.568034
475377	0.567824
139086336	0.5676
156594202	0.567495
23629091	0.567459
3034646	0.5668
4269332	0.5668
146013455	0.566614
6479137	0.566555
511994	0.566555
6479138	0.566555
6334181	0.56548
121006759	0.56389
121486745	0.561283
9883997	0.560141
15450939	0.55954
131887892	0.559061
18638512	0.55676
121487373	0.554678
250667	0.553393
65165	0.553393
135434784	0.553365
162641488	0.552203
454738	0.551833
500247	0.551758
92270653	0.551758
122631	0.551489
91351996	0.551106
453168	0.550574
152369	0.549995
135499473	0.549975
121486943	0.549274
9813298	0.548346
14430375	0.547282
452097	0.547282
452695	0.546709
449623	0.544154
56961027	0.543215
134229959	0.542374
516084	0.542174
516079	0.542174
64979	0.541562
4993488	0.539812
21157804	0.539812
93977460	0.537585
45039906	0.537585
3035491	0.537585
44292105	0.534433
54464796	0.534433
18643544	0.53382
132663	0.533788
135440057	0.533518
121486942	0.532172
72274	0.5319
10684273	0.531156
70021591	0.530616
21625759	0.530269
160130	0.530023
136042739	0.529981
516072	0.529856
541545	0.5286
121486739	0.528276
54528106	0.52821
5272665	0.527064
21123822	0.526706
6426626	0.526319
14237950	0.526319
137183035	0.525021
454164	0.524765
451457	0.524624
11208805	0.524328
3010355	0.523237
135513856	0.523162
10833407	0.523074
131854439	0.521833
387072	0.521343
72195	0.521264
22027846	0.521264
191008	0.520065
3011904	0.519649
136195916	0.519315
125623	0.518679
13994713	0.518679
135511113	0.518225
135764598	0.517734
6334060	0.517651
122625	0.516496
14503009	0.516496
453034	0.516496
154703288	0.516008
14806063	0.515358
196710	0.515358
46875292	0.515149
97186	0.515149
511378	0.515139
121486931	0.514643
71351836	0.514643
451843	0.514601
14132914	0.514121
72263	0.514121
452094	0.513966
13989284	0.513521
451854	0.513521
131845437	0.51318
5470408	0.513101
131880514	0.513101
451615	0.512766
121486885	0.512673
13989274	0.512226
451369	0.512226
452613	0.511883
194102	0.511703
453757	0.510848
168120	0.509694
135815016	0.509601
135531159	0.509601
131876195	0.509357
9562214	0.509357
92236380	0.509357
6334737	0.508047
54417000	0.508008
584546	0.508008
135618603	0.507962
464406	0.507786
440055	0.507649
1835	0.507649
13279	0.507649
27556881	0.507649
11870685	0.507322
6553756	0.507322
2779363	0.507322
25724943	0.507322
96326068	0.507322
11870684	0.507322
135416725	0.507294
3005947	0.507054
460316	0.506097
126961829	0.505696
129674064	0.504817
107870	0.504177
511856	0.504007
511854	0.504007
54165040	0.503511
453165	0.502349
452771	0.502198
91483617	0.502025
71621663	0.501994
139025758	0.500154
15612873	0.499966
452057	0.499442
14159102	0.499442
71771894	0.499388
470801	0.498398
92021611	0.497937
98801	0.496805
3080705	0.496
21829243	0.495984
14654332	0.495809
451451	0.495809
121228751	0.495552
71303902	0.494595
121487149	0.494209
44124071	0.494009
108175	0.493563
92150012	0.493563
512720	0.493551
50989162	0.493551
451780	0.493054
14632485	0.493054
10778510	0.49279
131884916	0.492537
64978	0.491164
14030964	0.491164
135438476	0.490677
134229909	0.490487
136030678	0.489551
493016	0.489367
10399334	0.489048
138393692	0.488919
464378	0.488731
3005949	0.487798
121486756	0.487689
439541	0.487181
3002879	0.486859
486177	0.486801
9965654	0.486311
604832	0.48596
452946	0.483978
451391	0.48331
510979	0.483241
5272752	0.482577
451494	0.481211
108074	0.480773
453467	0.480773
21118337	0.480773
10922698	0.480773
6573798	0.480773
3037219	0.48076
71750272	0.479948
135596554	0.477836
600164	0.475955
493443	0.475955
135538692	0.475639
455179	0.475142
102531168	0.474903
101339887	0.474903
53940462	0.474796
122622	0.474658
492201	0.473475
71302590	0.47218
76973308	0.471706
72194	0.47138
92151285	0.47138
491674	0.47138
359064	0.47138
5487206	0.471121
449599	0.470736
6426867	0.470527
6426868	0.470527
136381024	0.470405
464137	0.470176
135482571	0.469618
9842606	0.46893
299952	0.468359
131881293	0.467828
451912	0.467405
154705590	0.467319
189898	0.466738
23112625	0.465664
10265713	0.465664
53968525	0.465584
16080049	0.463903
129570363	0.463382
452213	0.4633
473366	0.4633
14825624	0.462651
10445070	0.462069
5273	0.46171
452065	0.46169
44331126	0.461525
3011744	0.461525
146681753	0.460984
135456714	0.460624
189165	0.460605
482511	0.460532
133611960	0.460096
92131994	0.460096
14179187	0.460096
27476	0.460096
124383959	0.460096
136385771	0.459768
92245928	0.459436
65148	0.459436
67703952	0.459382
12777818	0.4589
155889176	0.458599
135556930	0.458599
452132	0.458581
16755631	0.458496
189495	0.45811
516066	0.457973
3012586	0.457912
444450	0.457534
10041866	0.457003
6474236	0.455981
133125648	0.455981
472634	0.455872
196433	0.454464
90673796	0.454268
451368	0.453461
121486926	0.453066
15673509	0.452491
131880518	0.452135
97297	0.451374
45039587	0.451374
25880707	0.451374
6419781	0.451374
3081401	0.449986
11140051	0.449566
11119722	0.448969
136228650	0.448031
118988859	0.447701
15289165	0.447587
381336	0.447238
500209	0.447238
131858473	0.446999
131873466	0.446699
156595074	0.446608
511377	0.4455
22848660	0.445234
497923	0.444882
139025108	0.444529
21603712	0.443892
131858479	0.443022
92262645	0.443022
92021270	0.441736
44633776	0.441736
131848792	0.441341
71431203	0.440459
21157436	0.440084
135538720	0.439845
10249185	0.439218
11514721	0.439218
129317836	0.439218
132283238	0.439218
456259	0.439002
3000501	0.439002
484832	0.439002
53463804	0.43893
196709	0.43893
101685599	0.438728
451851	0.438027
49784134	0.437949
73353418	0.436365
146160877	0.435494
137239458	0.435494
73345328	0.435167
154703233	0.434471
121486953	0.434285
131877226	0.433134
136236459	0.433007
9903172	0.432778
135538675	0.432619
135433627	0.432499
71394590	0.431789
10515947	0.431462
154701266	0.43136
481523	0.430889
490445	0.430449
15612856	0.430045
310052	0.430045
129395379	0.429881
12803301	0.429881
12803302	0.429881
136259535	0.428465
135398596	0.428465
135511145	0.426723
16728337	0.42654
10029973	0.426502
452612	0.426254
3000603	0.426187
3032355	0.426187
5273979	0.426076
3037739	0.425672
139025114	0.424736
21853097	0.424413
53909434	0.422311
54357487	0.421756
14603759	0.421646
451579	0.421424
135398630	0.42142
9992006	0.420536
71383199	0.420449
124201	0.419632
92132157	0.419226
90488943	0.419226
73265308	0.419226
147569	0.419226
6602111	0.419226
13009312	0.419226
5287590	0.418171
92262454	0.418145
137128754	0.417593
5273624	0.417467
3246335	0.416935
11057044	0.416867
121013684	0.416867
71539359	0.415704
3010383	0.4157
451450	0.41555
451846	0.415172
3036899	0.415135
516074	0.414429
45041252	0.413983
476786	0.413431
131852022	0.41341
3011251	0.413407
23260220	0.412843
6509777	0.412685
452765	0.411987
12777820	0.411017
16760025	0.410739
129291491	0.410469
498972	0.41046
136643516	0.410358
345785	0.410116
121486862	0.410101
25074416	0.409281
10915407	0.409281
94136	0.408671
7264507	0.408671
22803666	0.408671
477875	0.408321
91668455	0.407716
446048	0.407443
644264	0.407443
6083	0.407443
34768	0.407443
83862	0.407443
1549371	0.407443
451844	0.406904
13989276	0.406904
455227	0.405606
135582356	0.405455
476779	0.40518
469869	0.404673
135538725	0.403911
121486960	0.403584
121487492	0.402946
121486817	0.402921
135460966	0.40283
135625234	0.40283
136927403	0.40283
86592813	0.402523
13833648	0.402262
13833646	0.402262
451362	0.402262
163320926	0.401596
18660583	0.40084
13833655	0.400708
451366	0.400708
164891	0.400695
44366461	0.400566
3000230	0.400485
13872084	0.400109
11254830	0.39965
3013082	0.399516
155395	0.399176
10516095	0.398207
11825687	0.396601
493439	0.396582
17756742	0.396393
135434782	0.396118
393623	0.395913
452445	0.39485
14862322	0.39469
384101	0.394259
86592810	0.394174
139025050	0.3934
15764402	0.392012
135455539	0.391989
135538026	0.39159
13988994	0.391403
21115127	0.391403
72265	0.391403
452055	0.391403
10660693	0.391235
6479393	0.390828
130060	0.390619
59048458	0.390523
440142	0.390503
145705861	0.390263
121486963	0.389561
137699672	0.389324
451372	0.388984
9942889	0.387906
21769885	0.387854
13009365	0.387641
121008092	0.387359
22899176	0.386715
3881219	0.386649
7282386	0.386639
392940	0.38657
490622	0.386057
68810748	0.385968
135625266	0.385808
56671903	0.384876
10999973	0.38472
92243924	0.384593
21144466	0.384593
154706402	0.384368
155889717	0.384368
493454	0.38386
121486933	0.383016
477851	0.382798
4661673	0.382693
131884919	0.382651
15673565	0.382397
131874830	0.382115
57349456	0.381149
57263944	0.380888
3011746	0.380888
71311249	0.380888
9970516	0.380446
135973951	0.38033
453996	0.380114
92279160	0.380114
476457	0.379396
101623924	0.378186
451965	0.378171
14862330	0.378087
452265	0.377757
135659015	0.377354
14132953	0.377107
451847	0.376829
3010410	0.375715
131881813	0.375662
10108689	0.375605
10358690	0.375276
128656	0.375228
12016027	0.374795
91926387	0.374648
456401	0.374388
490684	0.374339
15289164	0.373873
72212336	0.373873
44560559	0.373686
22793986	0.373319
92242775	0.372971
3006169	0.372971
154746984	0.372818
135554419	0.372665
121487460	0.372346
511014	0.372073
452030	0.37149
13871040	0.370533
59035009	0.3703
509187	0.370237
11666177	0.370029
472633	0.369805
24776418	0.369752
131858477	0.369589
3080864	0.369461
150667	0.368794
96547	0.368597
6595777	0.368597
3901376	0.368003
13009730	0.368003
18651801	0.367839
163888	0.367688
118294346	0.366915
135596618	0.366685
73351959	0.366515
136190395	0.366492
125924	0.366436
10037425	0.366436
451908	0.366198
14330066	0.365762
14330067	0.365762
137189782	0.365285
121486990	0.365216
483936	0.364981
53678903	0.364794
15612862	0.364088
54336181	0.363734
90673794	0.362747
492561	0.362675
121010792	0.36248
163285680	0.361978
137699671	0.36153
504735	0.361337
69762616	0.361323
472814	0.360623
6475236	0.360623
89858725	0.360598
490435	0.36018
44308741	0.36018
73651	0.36018
12799571	0.360171
3005948	0.359692
639614	0.35942
131700647	0.35942
96851	0.359169
57324057	0.359169
10108316	0.359049
13871395	0.358721
5272743	0.358224
3010808	0.358103
44567065	0.358043
4393085	0.357894
146674673	0.357722
67353063	0.357436
3010384	0.357336
92246004	0.357336
2724387	0.357325
45038133	0.357325
13096956	0.357325
7458589	0.357325
449584	0.357267
5278277	0.357155
71487589	0.356856
135926583	0.356707
135616717	0.356707
5271296	0.356699
460317	0.356352
136295216	0.35628
121487870	0.356166
12939901	0.355698
10521478	0.355698
96544	0.355698
688019	0.355698
46783463	0.355698
7070208	0.355698
12939902	0.355698
2777912	0.355698
44283163	0.355698
14481266	0.35563
137092996	0.355406
11358266	0.354769
3034808	0.354741
14485373	0.354741
471486	0.354681
44281962	0.354465
330549	0.354398
198689	0.354398
90674669	0.354355
452421	0.354061
154730315	0.353828
21829540	0.353785
13989335	0.353668
13989334	0.353668
171490	0.352799
5274011	0.352693
357380	0.352574
11601179	0.352491
130783	0.352491
135485495	0.35249
3011924	0.352477
135447001	0.352427
512679	0.352251
11243021	0.351849
5273013	0.351803
136272490	0.351664
465094	0.350782
470049	0.350782
15612799	0.350589
452053	0.350072
121486930	0.350072
135743935	0.349655
3037046	0.349284
86751195	0.349147
455839	0.348918
464376	0.348866
12803287	0.348166
490630	0.348061
477015	0.347991
452423	0.347897
14776494	0.347342
14842981	0.347221
135897124	0.347217
135920662	0.347217
137108250	0.347217
136821128	0.347217
135445750	0.347217
135897000	0.347217
135743934	0.345633
191759	0.344916
5270727	0.344664
129350	0.344047
11140845	0.344047
22366141	0.343924
481522	0.34389
3009860	0.343735
3005946	0.343682
91809617	0.343634
14862326	0.343395
134220	0.342593
6505368	0.342593
6439649	0.342593
121487869	0.341795
196471	0.341697
3008139	0.34154
479299	0.341531
97454	0.341483
71414969	0.341189
24820365	0.340792
469441	0.339942
102002581	0.339616
453820	0.339597
71761460	0.339358
136235943	0.339217
136633725	0.339119
452277	0.339094
71434113	0.338547
133589974	0.338541
3036983	0.338452
92236674	0.338306
11501773	0.338089
451882	0.337928
135405195	0.337878
135410239	0.337799
153282930	0.337775
15955042	0.337767
9856930	0.337743
136183881	0.337496
512595	0.337229
475547	0.3369
137176536	0.336768
135602211	0.336768
1838	0.335836
23149721	0.335528
10492927	0.335528
56977943	0.33502
131843075	0.334832
50987538	0.333883
512719	0.333883
135616719	0.333669
70818775	0.333546
16133029	0.333422
54535902	0.33333
86751121	0.33296
134229912	0.332763
11697484	0.332069
484806	0.332012
135398639	0.331903
478560	0.331895
510999	0.331839
10107866	0.331515
5271381	0.331347
92969927	0.331347
159359	0.331347
123134085	0.331347
121487110	0.331262
477016	0.331262
477017	0.331262
5273490	0.330919
512332	0.330815
22844922	0.330737
5273510	0.330511
135445713	0.330098
136025160	0.330098
136892633	0.330098
135440068	0.330098
136017105	0.330098
136892634	0.330098
136067613	0.330098
71304002	0.330076
125478223	0.329958
15612863	0.329605
513124	0.329578
7045516	0.329578
513122	0.329578
5894	0.329578
6479900	0.329577
6475205	0.329577
71762307	0.329195
92286289	0.328961
92970665	0.328376
503811	0.32829
135742144	0.328156
42637091	0.328155
451774	0.328119
14410995	0.328119
513858	0.327986
451821	0.327739
14444210	0.327739
44356940	0.327667
169662	0.327667
29982328	0.327667
92845691	0.327667
134694066	0.327667
12042143	0.327667
93604123	0.327667
162640530	0.327534
6992262	0.327108
172916	0.326986
474355	0.326851
156588467	0.32685
131850900	0.326663
506145	0.326262
467290	0.326208
375477	0.326208
71023056	0.325279
10308889	0.324915
10660621	0.324816
6858194	0.324613
136921541	0.324282
512680	0.323819
472632	0.323349
472655	0.323349
49791785	0.323349
5276954	0.323061
453864	0.322839
121486764	0.322604
71621351	0.322197
97298911	0.322071
90470199	0.321638
135743990	0.321526
25232717	0.321036
11776820	0.320798
135538691	0.320786
44353411	0.319798
451576	0.319798
453657	0.319321
42553032	0.318884
71832128	0.318884
42553033	0.318884
5274204	0.318549
14156718	0.318167
513034	0.317975
135491477	0.317964
14079545	0.317703
49784136	0.317686
92024153	0.317402
11507134	0.317402
493452	0.3171
11173824	0.316808
452342	0.316657
247678	0.316207
13831293	0.315302
25182693	0.315146
127259583	0.31477
131885188	0.314337
10678117	0.314124
15934097	0.313907
452988	0.313884
10065192	0.313808
92264741	0.313808
11324342	0.313552
14410899	0.313381
444171	0.313186
15118691	0.313116
92241033	0.313116
266939	0.313085
7075697	0.313085
6438736	0.31267
161605	0.312097
5273977	0.312088
135459780	0.312032
137700694	0.311935
5274089	0.311526
102381544	0.310623
18641862	0.310422
92148590	0.310379
15954525	0.310379
469447	0.310317
512555	0.310217
21854430	0.309412
23519664	0.3093
5274200	0.309292
22881724	0.308929
451819	0.308549
66739168	0.308549
295521	0.308002
135415644	0.308
3061100	0.307876
50989994	0.307876
10107793	0.307807
92249433	0.307807
10403118	0.307552
265298	0.307552
151840	0.307215
136058528	0.307153
121487874	0.307001
71302445	0.306912
53724373	0.306467
136415743	0.306403
508215	0.305658
54069128	0.305598
134067785	0.305398
6857539	0.305223
92271314	0.305223
22879197	0.305157
5270	0.305157
6603995	0.305157
452680	0.304916
135491495	0.304399
121486955	0.304283
136776919	0.303971
453036	0.303903
156594224	0.303583
14258187	0.303559
127258186	0.303229
131853803	0.302238
258591	0.302238
121486901	0.302207
10357262	0.301884
136229440	0.301704
57375625	0.301687
512590	0.301685
21829242	0.301368
135515425	0.301032
21603711	0.30084
3010378	0.300793
92339825	0.300793
57398955	0.30037
10735437	0.300341
135463029	0.300194
451876	0.300049
23518344	0.300019
10378169	0.299676
3000371	0.299197
29980301	0.298531
59051498	0.298531
20285	0.298531
46875049	0.298531
12896821	0.298531
16861	0.298531
134694098	0.298531
11390847	0.298334
301080	0.298117
131879863	0.298117
11380753	0.297243
139025107	0.297243
135501934	0.29692
136752834	0.29692
360530	0.296798
451367	0.296798
10967535	0.296753
10378968	0.296427
131882742	0.296188
71302592	0.295567
469868	0.295318
365913	0.295318
131858702	0.295172
121487313	0.294999
189237	0.294571
148264	0.294517
44372794	0.294299
23255305	0.294261
14216458	0.294261
261564	0.294261
71315456	0.29412
56995133	0.29412
154731285	0.29412
139024324	0.29412
67419448	0.29412
10037499	0.29412
134694166	0.29412
59859763	0.29412
29942411	0.29412
453474	0.294092
454983	0.29396
125836	0.293603
121487029	0.293064
14310518	0.292718
452023	0.292712
6479136	0.292162
493442	0.292061
13915760	0.29156
127258188	0.291332
501517	0.290538
15160100	0.290235
350902	0.290235
135415643	0.290061
376225	0.290014
71627217	0.289847
92236337	0.289695
3006170	0.289695
6453528	0.289655
14366984	0.289655
121487534	0.289363
15938966	0.28897
156594562	0.288654
13712878	0.287879
10474045	0.287843
454195	0.287572
54112622	0.287498
18596452	0.287343
125352184	0.287099
53755441	0.287045
1468	0.286733
136262592	0.286578
136217255	0.286578
127734	0.286436
132942400	0.286254
156594861	0.286169
68655403	0.286134
254843	0.285513
21822369	0.285513
453473	0.285149
137699364	0.284879
5273973	0.284826
11778706	0.284707
92132405	0.284707
69626224	0.284707
92265647	0.284681
4399980	0.284681
478561	0.284145
14498611	0.284111
135411006	0.284084
10831407	0.284065
101670692	0.283807
135538673	0.283732
451896	0.283591
452021	0.283576
352991	0.28348
101510	0.28348
21117609	0.28348
154701265	0.283002
3007129	0.282931
137699529	0.282795
506491	0.282752
92243772	0.281865
21818173	0.281865
451911	0.281381
65269	0.281381
3005953	0.280879
136921545	0.280052
10492996	0.279647
14775452	0.279638
92236670	0.279575
494096	0.279575
5274287	0.279511
135417318	0.279096
76973833	0.278695
5287841	0.278398
10903360	0.278398
146160048	0.278387
138058736	0.278387
137699191	0.278387
7458588	0.278337
7058183	0.278337
70700492	0.278302
3035041	0.278138
6426864	0.278138
6426863	0.278138
6451942	0.278138
512291	0.278037
5276642	0.278022
131698258	0.278022
50312	0.278022
44629847	0.277824
9879442	0.277824
11957496	0.277824
8974	0.277824
15573115	0.277824
44398142	0.277824
6603778	0.277824
40488632	0.277824
15573114	0.277824
21815879	0.277791
165600	0.277728
503011	0.277728
6913230	0.277588
3363163	0.277588
137195841	0.277261
514803	0.27683
469867	0.276756
365914	0.276756
5279426	0.276301
11723585	0.276267
451566	0.276151
509516	0.276151
6482628	0.276115
92301827	0.276115
135528754	0.275599
3011895	0.275575
469866	0.275345
136921544	0.275194
124528040	0.274948
147730945	0.274857
5274365	0.27482
131852023	0.274734
135437126	0.274382
136065590	0.274382
512705	0.274301
135849075	0.27429
10424498	0.274188
147146	0.274164
11138740	0.274122
92233233	0.274093
65563	0.274093
10615718	0.274051
12939904	0.274051
135538689	0.273963
163285626	0.273869
5274367	0.273817
19698912	0.273709
3012251	0.273709
121006658	0.2732
22867782	0.273147
5274689	0.272955
135618546	0.272858
135464489	0.27282
6334197	0.272603
21145446	0.272481
259661	0.272447
87824027	0.272375
296233	0.272375
10658439	0.27222
10067373	0.271702
479691	0.271343
188215	0.271054
6450904	0.271033
50989698	0.271033
135435173	0.270911
49784438	0.270845
3007127	0.270747
131855105	0.270677
117590597	0.270166
3007216	0.269983
60122232	0.269944
92845515	0.269944
44316328	0.269944
59844438	0.269944
13871033	0.269944
13871035	0.269944
500902	0.269944
53699964	0.269839
6480510	0.26969
20646474	0.269575
3010294	0.269551
121006820	0.269285
11403295	0.269163
136020889	0.268518
86592812	0.268145
4569866	0.267962
131846682	0.267962
451837	0.267873
474672	0.267725
10331902	0.267725
3005966	0.267688
24867261	0.267656
20279	0.267656
21147181	0.267656
9816508	0.267242
192532	0.267148
121217181	0.267059
131884633	0.266962
3011933	0.266956
129388670	0.26677
53908939	0.266636
71621353	0.266379
194101	0.266338
131856456	0.265375
121487087	0.265348
135407854	0.26446
215491	0.264144
137699423	0.263836
135783064	0.263532
44572473	0.26312
67447429	0.262672
496427	0.262601
3012258	0.262566
54121140	0.262547
135405922	0.262109
22792824	0.261233
121487290	0.261099
9975088	0.260533
136190394	0.260394
135921348	0.260139
14806070	0.260111
5494430	0.260025
71352205	0.259942
54526893	0.259098
15172876	0.259015
13871050	0.258956
21151082	0.258796
53322921	0.258757
451395	0.258613
14444219	0.258613
511720	0.257915
15172905	0.257768
13846336	0.25761
135718450	0.257475
131880742	0.257234
121578	0.257194
10684201	0.257063
14862343	0.256869
14367026	0.256705
514806	0.256694
23317974	0.256694
5276644	0.256694
131844007	0.256635
133609839	0.256607
121221202	0.256346
90487625	0.256111
121487359	0.255907
121216262	0.255803
14539818	0.255664
126968624	0.255612
21854299	0.255612
135410347	0.255505
14132955	0.255441
137256436	0.255277
121486766	0.25521
9900206	0.25514
355458	0.254973
10661693	0.254829
5270502	0.254829
49784135	0.254528
14885931	0.254468
3009328	0.25428
125496047	0.254025
135405252	0.254009
77833698	0.253978
70367073	0.253978
131857992	0.253544
121487532	0.253514
54339089	0.253425
121486825	0.25327
10521659	0.253234
131876194	0.253109
121487030	0.252998
121486843	0.252945
54148415	0.252834
451370	0.252771
13989277	0.252771
163285627	0.252388
129735822	0.252388
3012256	0.252123
21854431	0.25181
3006618	0.251736
11749237	0.251708
3067878	0.251432
515224	0.251178
3008126	0.251077
451781	0.25083
135788892	0.250792
12115951	0.25064
511761	0.25064
6338568	0.250174
10446782	0.250166
125494577	0.250124
193541	0.249778
6398342	0.249545
510978	0.249009
472656	0.248829
472638	0.248829
136088501	0.248673
135718453	0.248673
9795336	0.248549
136803255	0.248528
135511063	0.248451
49822695	0.247515
135467705	0.247438
14727679	0.247156
12810881	0.246677
76844804	0.246625
5273626	0.246595
21820463	0.246577
58834006	0.246577
65102	0.246577
12800105	0.246577
273017	0.246525
135976885	0.246361
470800	0.246196
92159758	0.24617
245694	0.24617
26974701	0.246161
146674699	0.245878
466018	0.245828
3034638	0.245571
3034648	0.245571
71444956	0.245491
3037010	0.245235
136682650	0.244899
136260091	0.244899
3007128	0.244537
15118681	0.244463
92132092	0.24434
334830	0.24434
10934996	0.24434
20847520	0.244335
135435111	0.244286
5698	0.244271
6323540	0.244271
71374221	0.243789
22875360	0.243744
3011905	0.243676
9797705	0.243585
154809499	0.243257
3005964	0.243213
516086	0.243091
131884918	0.242725
135493007	0.242522
129437559	0.242389
126283	0.242297
459903	0.242297
9838550	0.242289
464381	0.242219
464379	0.242065
155905705	0.241979
453631	0.241973
21797130	0.241939
45357254	0.241939
44629881	0.241939
46874491	0.241939
45358303	0.241939
102197	0.241939
7173845	0.241939
135508096	0.241928
451375	0.24146
24820718	0.24138
10541096	0.241178
121487089	0.241144
131881042	0.241144
3007912	0.240638
6536767	0.240614
5273934	0.240614
356019	0.24057
10082523	0.24057
451363	0.24057
135401030	0.240012
358368	0.239956
122130386	0.239862
439920	0.239845
3005950	0.239046
21456083	0.239046
265287	0.238987
131846711	0.238987
135398640	0.23894
3011360	0.238901
3010386	0.238138
129864	0.238004
7074855	0.237927
11580280	0.237319
360644	0.237253
151237987	0.237206
5272148	0.237106
156588443	0.236767
93476651	0.236751
10019125	0.236751
139025201	0.236437
22873382	0.236337
459942	0.235458
71412032	0.23543
373953	0.235251
9885936	0.235167
10467227	0.234953
483927	0.234848
11119839	0.234688
133135	0.234597
191831	0.234046
6482480	0.234046
12940782	0.234046
5278749	0.233572
49784203	0.233556
191568	0.233396
474356	0.233221
14408976	0.232885
136706893	0.232845
484808	0.232785
9883190	0.232635
5274009	0.232479
21140290	0.23244
3080753	0.232437
10802684	0.232326
3011899	0.232272
5274085	0.232272
470030	0.231982
92236455	0.231917
14102245	0.23185
163320836	0.23185
70798618	0.231804
11301215	0.231804
92021816	0.231804
269843	0.231579
92161689	0.231579
14731753	0.231579
483937	0.231465
72283	0.231336
512717	0.231187
131693	0.230818
511885	0.230783
473083	0.230763
447069	0.230752
53741175	0.230716
88518334	0.230496
5272754	0.230389
460320	0.230369
21627889	0.230231
21140838	0.230192
131858038	0.230168
92266557	0.230168
131883949	0.230168
464377	0.230123
21069732	0.230044
6476927	0.22972
136791445	0.229676
512708	0.229597
3082596	0.229581
22880800	0.229444
171555	0.229403
22818440	0.229125
56851256	0.228763
136199998	0.228756
488242	0.228596
136238397	0.228585
453994	0.22857
355900	0.22857
73442717	0.228374
92230799	0.228374
516040	0.228114
155903787	0.228038
464390	0.2279
136745025	0.227872
135406950	0.227872
136441961	0.227872
18632917	0.227809
20722670	0.227808
121487417	0.227659
135764626	0.227516
6367704	0.227399
381335	0.227399
495778	0.227399
5468297	0.227399
18533908	0.227216
116493392	0.227072
121487134	0.226721
5273975	0.226466
11023772	0.22641
506490	0.226405
29921449	0.226387
499786	0.226302
3010398	0.226241
15410716	0.225414
217704	0.22538
125654	0.225281
93258	0.225281
131871944	0.224796
464374	0.224751
135454023	0.224712
136257794	0.224712
136824017	0.224712
136235778	0.224712
135518164	0.224712
14842863	0.224594
137249367	0.224167
12151656	0.224031
15059928	0.223996
121007013	0.223979
89971724	0.223771
21145448	0.223514
3063029	0.223283
137204795	0.223213
56987376	0.223062
158379	0.222657
476461	0.222564
121487055	0.222554
136801906	0.222278
135404725	0.222273
121486973	0.222073
676166	0.222008
3034423	0.222008
6595185	0.222008
11507479	0.222008
71420849	0.221961
9862222	0.221903
1260547	0.221807
6560303	0.221706
97078	0.221706
5274286	0.221526
10107217	0.221262
452498	0.221205
45039507	0.221039
137212578	0.220798
15868081	0.22079
121216298	0.220537
155290824	0.220487
59035028	0.220477
92262962	0.220477
510972	0.220362
22885208	0.220282
149098	0.220092
3012550	0.219991
490390	0.219902
3080922	0.219795
92209277	0.219795
155885413	0.219795
3005951	0.219459
6481604	0.219386
77844687	0.219363
66811505	0.219304
131882875	0.219123
316992	0.219123
3006932	0.219036
101627711	0.21894
136088507	0.218639
121486935	0.218481
363533	0.218413
494651	0.218413
494647	0.218387
493843	0.218385
493838	0.218385
136025255	0.218384
71168458	0.218325
453464	0.218325
5280	0.218325
65119	0.218325
24207724	0.218325
490432	0.218317
135800809	0.21828
136176844	0.21828
11107495	0.218112
22880803	0.21792
451393	0.217775
21721736	0.217459
154704811	0.217336
155889187	0.217336
171185	0.216909
92266931	0.216909
236526	0.216854
13831573	0.216854
135445744	0.216716
135927359	0.216716
470796	0.216528
92231374	0.216402
168948	0.216402
69726377	0.216402
248869	0.216402
96373	0.216355
6560385	0.216355
13766569	0.216355
57035796	0.216355
90470943	0.216347
136236477	0.216184
135538693	0.216156
102602182	0.215997
70587122	0.215619
135625267	0.215503
121486947	0.215463
381338	0.215422
495779	0.215422
451849	0.215205
12150481	0.215167
21140569	0.215124
510982	0.214881
137214373	0.214666
5274081	0.213893
495012	0.213714
21821293	0.213655
137090731	0.213653
5272848	0.213516
71352076	0.212755
1190	0.212721
73323	0.212721
122280	0.212721
135741933	0.212476
453829	0.212387
21668259	0.212216
13963301	0.2119
92269812	0.2118
3080626	0.2118
135427250	0.211793
136238399	0.211765
454167	0.211674
6454581	0.211298
92231363	0.210924
29921448	0.210924
156594113	0.210919
9796227	0.210892
451593	0.210776
9813340	0.210776
135410303	0.210632
7269451	0.210549
107643	0.210549
13887579	0.210549
92132277	0.210549
9992648	0.210549
188276	0.210483
481083	0.209875
481081	0.209875
21139854	0.209513
92236279	0.209513
135538671	0.209497
135538642	0.209497
135800807	0.209497
135532713	0.209497
12067880	0.209459
135804809	0.209073
6480444	0.208927
93481381	0.208927
335399	0.208927
136644173	0.208662
136628879	0.208662
135453910	0.208662
10357410	0.208543
137699517	0.208518
151360	0.20851
14843513	0.20843
5289230	0.208124
6333525	0.207929
12873547	0.207926
92132221	0.207926
6451965	0.207926
134693185	0.207926
139025685	0.207879
23519675	0.20787
21595512	0.207733
71429365	0.207567
10755180	0.207515
54515638	0.207443
11335407	0.207302
11807505	0.207265
139024626	0.207265
54073031	0.207116
12071879	0.207031
6714006	0.207031
3065117	0.206966
14284094	0.206768
14860273	0.206627
14860272	0.206627
100417	0.206531
121487370	0.206399
515102	0.206341
5273627	0.206294
71340416	0.206293
53974427	0.206222
10988995	0.205927
72264	0.205852
452036	0.205852
11777114	0.205736
10265835	0.205433
121217040	0.205333
260138	0.205333
10424703	0.205257
162367444	0.205104
131883271	0.204962
101075208	0.204941
77620858	0.204512
476788	0.204294
57368268	0.204143
3012549	0.204074
13870936	0.204021
131854196	0.203992
510573	0.203863
476406	0.203809
451522	0.203809
72213	0.203809
361921	0.203809
7058165	0.203462
6334744	0.203362
10869630	0.203301
366988	0.202776
6618663	0.202631
13020162	0.202631
65049	0.202631
[truncated: 5,269 more rows]

## Sheet: 7. IL-1β
cid	Probability of anti-IL-1β
21140827	0.827275
127256358	0.82358
110158190	0.802195
387072	0.796142
3792400	0.792193
10013690	0.792193
1620177	0.792193
126961829	0.784617
472636	0.78348
194101	0.783297
21853097	0.776261
5271015	0.776114
131884919	0.775354
3000303	0.774263
3000242	0.774263
14978	0.772153
92209900	0.772153
46875748	0.772153
3007220	0.772153
501518	0.771344
5271016	0.771145
9885936	0.766221
3010383	0.764639
482589	0.764445
131884916	0.763117
131885345	0.756497
6480510	0.756045
451912	0.755928
370629	0.755501
10704791	0.755501
490435	0.755002
44308741	0.755002
73651	0.755002
131884920	0.754779
131884918	0.75254
490445	0.749393
10108316	0.746581
131881293	0.746022
9862222	0.743997
21853094	0.743635
501519	0.741138
493016	0.741106
134229909	0.740917
472637	0.737192
11776820	0.736271
3010378	0.736014
92339825	0.736014
148033	0.735369
506145	0.732445
22880809	0.73089
73353418	0.730508
92233558	0.726891
512127	0.726891
46874399	0.726891
71305626	0.726891
45038620	0.726891
3007223	0.725855
11358266	0.725108
92150012	0.724757
108175	0.724757
395997	0.724253
134229959	0.723138
6531437	0.722887
471865	0.722887
65269	0.721284
451911	0.721284
3007918	0.720803
6245	0.720803
92209904	0.720803
92846012	0.720803
23616027	0.720803
44330586	0.720803
92209902	0.720803
21776949	0.720803
92262645	0.719966
131858479	0.719966
98801	0.719343
118796809	0.719328
131881813	0.718056
358367	0.716554
472633	0.715626
451914	0.712211
446940	0.709271
512658	0.706879
482510	0.706787
500247	0.706678
92270653	0.706678
490432	0.704853
92242775	0.704684
3006169	0.704684
65399	0.704416
44400589	0.704416
71262374	0.704416
49784203	0.704311
92237060	0.704221
97453	0.704221
350834	0.70337
131708761	0.702975
11277569	0.702943
92243924	0.70272
21144466	0.70272
121486830	0.700844
72212339	0.699806
256026	0.698699
5270802	0.698699
121486926	0.698523
44572473	0.697947
124156	0.696917
510983	0.696917
10017261	0.696917
49784135	0.696706
189898	0.696451
489877	0.694991
46875339	0.693893
92246571	0.693893
3010388	0.693893
97297	0.693808
6419781	0.693808
25880707	0.693808
45039587	0.693808
92242762	0.693553
3010376	0.693553
125496047	0.692747
131885796	0.692108
92236674	0.69141
13712878	0.69111
10833407	0.69081
1468	0.690509
451915	0.690273
15953881	0.690273
285676	0.690173
357072	0.68995
255105	0.68995
11737492	0.689918
131881064	0.689653
92247204	0.689653
161470	0.688859
147569	0.688789
92132157	0.688789
73265308	0.688789
6602111	0.688789
90488943	0.688789
13009312	0.688789
469861	0.688035
126704	0.687796
469184	0.687796
6479393	0.687528
44626655	0.687315
53462020	0.684428
127187	0.684428
46875292	0.682714
97186	0.682714
6595184	0.680607
7043952	0.680607
124528040	0.680088
21140290	0.679024
13831293	0.678932
2999329	0.678076
21144622	0.677155
23190	0.675615
93055319	0.675615
44386188	0.675615
12769724	0.675615
54069128	0.674327
512725	0.674089
49784137	0.673871
479299	0.673242
6481604	0.67323
94358774	0.67309
23260220	0.672586
50987538	0.672295
512719	0.672295
21139599	0.672172
92230795	0.671736
18661221	0.671736
125507539	0.671681
129395379	0.670383
12803302	0.670383
12803301	0.670383
466400	0.670377
6478491	0.669932
21116879	0.668902
93003	0.668902
7065210	0.668902
44629860	0.668902
14481266	0.668237
9562214	0.667745
131876195	0.667745
92236380	0.667745
24011706	0.667447
13009044	0.667402
70385614	0.666729
131881061	0.666703
5272659	0.666185
512135	0.665732
92231367	0.665199
18661222	0.665199
452613	0.664181
22861745	0.664045
393623	0.661851
116493392	0.661465
193188	0.659606
121486812	0.659307
10890867	0.659307
12358325	0.659307
21854430	0.659161
21829243	0.658929
72501	0.6578
516072	0.657755
96124	0.657535
92229496	0.657535
15926747	0.657401
10517504	0.657299
21140106	0.657206
393545	0.656156
131885191	0.655342
10946143	0.655316
102381544	0.655036
470030	0.655004
10565387	0.654964
121486927	0.654908
12315238	0.654233
11098172	0.6536
10521478	0.653328
12939901	0.653328
12939902	0.653328
96544	0.653328
46783463	0.653328
2777912	0.653328
7070208	0.653328
688019	0.653328
44283163	0.653328
513636	0.651841
3010797	0.651686
21854428	0.650684
9842606	0.650675
6475236	0.649845
472814	0.649845
10358690	0.649413
92263388	0.648647
21140717	0.648647
15289165	0.647983
12358322	0.646955
6560357	0.646955
447916	0.646955
6420052	0.646955
644174	0.646955
5702004	0.646955
53384930	0.646955
638036	0.646955
60961	0.646955
70889269	0.646955
7040251	0.646955
54732806	0.646955
191	0.646955
160739	0.646955
21704	0.646955
12358321	0.646955
453548	0.646955
448378	0.646955
12358320	0.646955
490433	0.645805
128924	0.645501
139025871	0.645492
171798	0.64547
516053	0.645463
10265835	0.645002
71339247	0.644916
71352264	0.644916
92236337	0.644194
3006170	0.644194
71380931	0.644007
92236430	0.643302
13830713	0.642612
102175	0.642612
11957602	0.642612
5284425	0.642612
51397494	0.642612
1869	0.642612
101382	0.642612
40467934	0.642612
44633776	0.642317
92021270	0.642317
131843075	0.641431
3002879	0.64058
490626	0.640437
10085225	0.640299
16760678	0.640299
24906265	0.640299
504745	0.639102
373953	0.638402
490625	0.63837
155290824	0.638239
22880825	0.638206
121486766	0.637996
513124	0.637485
513122	0.637485
7045516	0.637485
5894	0.637485
3010380	0.636726
92233554	0.636726
59035009	0.636295
6509777	0.634475
162660830	0.634323
23279550	0.634207
3007224	0.634186
44329981	0.633981
326808	0.633981
470053	0.63137
236526	0.630213
13831573	0.630213
3012227	0.6302
23518344	0.630006
10492175	0.629516
451616	0.628981
71340337	0.628981
451908	0.628943
7116198	0.628425
6561296	0.628425
7075199	0.628425
12358319	0.628077
9993207	0.627749
44308761	0.627051
472635	0.627051
10923602	0.626988
40527693	0.626859
122619	0.626859
11821635	0.626859
2305663	0.626859
13873708	0.626859
905903	0.626859
57349456	0.625693
132663	0.624935
356796	0.624823
134229912	0.623532
495537	0.62256
10469766	0.622049
129674064	0.621495
155903793	0.621467
10611929	0.620901
11032861	0.619642
10892274	0.619382
516084	0.619263
516079	0.619263
49784136	0.619244
512718	0.619124
490627	0.61869
22880824	0.617917
10107793	0.617838
92249433	0.617838
92231363	0.617626
29921448	0.617626
123570113	0.617466
77844687	0.617125
513632	0.616737
266234	0.616645
84392	0.616645
11032790	0.616645
9816781	0.616645
92131953	0.616645
57061669	0.616645
92233339	0.616645
10264873	0.616278
102381563	0.615863
21157833	0.615724
490444	0.615583
5272654	0.615557
11807674	0.615522
10467227	0.615047
513477	0.615
451527	0.614758
512724	0.614294
3006961	0.612459
131883911	0.611511
15410716	0.611018
453864	0.610988
11821521	0.610881
73116931	0.610881
21634250	0.610642
58834035	0.610541
94725030	0.610541
12800104	0.610541
3035929	0.610541
94725032	0.610541
447594	0.610541
21580289	0.609989
131883912	0.609989
97078	0.609533
6560303	0.609533
452858	0.609183
21145733	0.609183
358197	0.609183
189165	0.609045
482632	0.60747
13830104	0.606977
14410899	0.60625
91150325	0.60577
129653012	0.605383
121486833	0.605133
86592810	0.604662
11824	0.604469
247955	0.604469
512290	0.604469
92228414	0.604469
5271782	0.604099
469447	0.60381
7058183	0.603099
7458588	0.603099
282734	0.601912
466018	0.601612
97515	0.601515
452769	0.601515
278931	0.601515
72212336	0.60084
15289164	0.60084
503008	0.600126
503009	0.600126
3006960	0.599045
131858474	0.598887
5272658	0.598811
14409040	0.598382
10264872	0.598259
56671903	0.597609
21069732	0.597169
3081401	0.597046
3012586	0.59533
93604123	0.594905
134694066	0.594905
12042143	0.594905
44356940	0.594905
169662	0.594905
29982328	0.594905
92845691	0.594905
131881305	0.594622
371485	0.594424
13097160	0.593899
121487870	0.593677
105116	0.592632
10945668	0.592632
10446782	0.592625
22366141	0.592508
9797705	0.592082
15450711	0.591161
57216635	0.591161
163199084	0.591161
160751	0.591161
13989335	0.591054
13989334	0.591054
5279426	0.590596
[truncated: 6,830 more rows]

## Sheet: 8. TNF-α
cid	Probability of anti-TNF-α
[truncated: 7,279 more rows]

[truncated: 1 more sheets: 9. CAL-27]
