# Supplementary material for: Development of Machine Learning Models for Precise Prediction of Bioactive Supramolecular Nucleoside Hydrogels
Source: Research Square preprint supplement (doi:10.21203/rs.3.rs-6888838/v1), 2025-07-10
Supplement: Supplementary file 2 [file 32bf4aa8761931ff101b8925.xlsx]

## Sheet: Sheet1
Supplementary Data 1. Datasets source
Bioactivity type	Abbreviation	Source	Project	Links
Biological toxicology	Toxicity	Tox 21	Subchallenges 1–12	tripod.nih.gov/tox21/challenge/data.jsp
Porphyromonas gingivalis	P. gingivalis	Pubchem	TAXONOMY 837	https://pubchem.ncbi.nlm.nih.gov/taxonomy/837
Human alphaherpesvirus 1	HSV-1	Pubchem	TAXONOMY 10298	https://pubchem.ncbi.nlm.nih.gov/taxonomy/10298
Varicella-zoster virus	VZV	Pubchem	TAXONOMY 10335	https://pubchem.ncbi.nlm.nih.gov/taxonomy/10335
Epstein-Barr virus	EBV	Pubchem	TAXONOMY 10376	https://pubchem.ncbi.nlm.nih.gov/taxonomy/10376
Human immunodeficiency virus	HIV	Pubchem	TAXONOMY 12721	https://pubchem.ncbi.nlm.nih.gov/taxonomy/12721
Interleukin-1β	IL-1β	Pubchem	Protein P01584	https://pubchem.ncbi.nlm.nih.gov/gene/3553
Tumor necrosis factor-α	TNF-α	Pubchem	Protein P01375	https://pubchem.ncbi.nlm.nih.gov/gene/7124
Centre Antoine Lacassagne-27	CAL-27	Pubchem	Cell Lines CAL-27	https://pubchem.ncbi.nlm.nih.gov/cell/3570
