# Supplementary material for: Development of Machine Learning Models for Precise Prediction of Bioactive Supramolecular Nucleoside Hydrogels
Source: Research Square preprint supplement (doi:10.21203/rs.3.rs-6888838/v1), 2025-07-10
Supplement: Supplementary file 6 [file 666d8e244d2da42570f99118.xlsx]

## Sheet: Sheet1
Supplementary Data 3. The details of 5566 molecular descriptors
Name	Description	Classification
MW	molecular weight	Constitutional indices
AMW	average molecular weight	Constitutional indices
Sv	sum of atomic van der Waals volumes (scaled on Carbon atom)	Constitutional indices
Se	sum of atomic Sanderson electronegativities (scaled on Carbon atom)	Constitutional indices
Sp	sum of atomic polarizabilities (scaled on Carbon atom)	Constitutional indices
Si	sum of first ionization potentials (scaled on Carbon atom)	Constitutional indices
Mv	mean atomic van der Waals volume (scaled on Carbon atom)	Constitutional indices
Me	mean atomic Sanderson electronegativity (scaled on Carbon atom)	Constitutional indices
Mp	mean atomic polarizability (scaled on Carbon atom)	Constitutional indices
Mi	mean first ionization potential (scaled on Carbon atom)	Constitutional indices
GD	graph density	Constitutional indices
nAT	number of atoms	Constitutional indices
nSK	number of non-H atoms	Constitutional indices
nAA	number of aromatic atoms	Constitutional indices
nTA	number of terminal atoms	Constitutional indices
nBT	number of bonds	Constitutional indices
nBO	number of non-H bonds	Constitutional indices
nBM	number of multiple bonds	Constitutional indices
SCBO	sum of conventional bond orders (H-depleted)	Constitutional indices
RBN	number of rotatable bonds	Constitutional indices
RBF	rotatable bond fraction	Constitutional indices
nDB	number of double bonds	Constitutional indices
nTB	number of triple bonds	Constitutional indices
nAB	number of aromatic bonds	Constitutional indices
nH	number of Hydrogen atoms	Constitutional indices
nC	number of Carbon atoms	Constitutional indices
nN	number of Nitrogen atoms	Constitutional indices
nO	number of Oxygen atoms	Constitutional indices
nP	number of Phosphorous atoms	Constitutional indices
nS	number of Sulfur atoms	Constitutional indices
nF	number of Fluorine atoms	Constitutional indices
nCL	number of Chlorine atoms	Constitutional indices
nBR	number of Bromine atoms	Constitutional indices
nI	number of Iodine atoms	Constitutional indices
nB	number of Boron atoms	Constitutional indices
nHM	number of heavy atoms	Constitutional indices
nHet	number of heteroatoms	Constitutional indices
nX	number of halogen atoms	Constitutional indices
H%	percentage of H atoms	Constitutional indices
C%	percentage of C atoms	Constitutional indices
N%	percentage of N atoms	Constitutional indices
O%	percentage of O atoms	Constitutional indices
X%	percentage of halogen atoms	Constitutional indices
nCsp3	number of sp3 hybridized Carbon atoms	Constitutional indices
nCsp2	number of sp2 hybridized Carbon atoms	Constitutional indices
nCsp	number of sp hybridized Carbon atoms	Constitutional indices
Fsp3	number of sp3 hybridized carbons/total carbon count	Constitutional indices
max_conj_path	maximum number of atoms that can be in conjugation with each other	Constitutional indices
nStructures	number of disconnected structures	Constitutional indices
totalcharge	total charge	Constitutional indices
nCIC	number of rings (cyclomatic number)	Ring descriptors
nCIR	number of circuits	Ring descriptors
TRS	total ring size	Ring descriptors
Rperim	ring perimeter	Ring descriptors
Rbrid	ring bridge count	Ring descriptors
MCD	molecular cyclized degree	Ring descriptors
RFD	ring fusion density	Ring descriptors
RCI	ring complexity index	Ring descriptors
NRS	number of ring systems	Ring descriptors
NNRS	normalized number of ring systems	Ring descriptors
nSpiro	number of spiro atoms	Ring descriptors
nBridgeHead	number of bridgehead atoms	Ring descriptors
nR03	number of 3-membered rings	Ring descriptors
nR04	number of 4-membered rings	Ring descriptors
nR05	number of 5-membered rings	Ring descriptors
nR06	number of 6-membered rings	Ring descriptors
nR07	number of 7-membered rings	Ring descriptors
nR08	number of 8-membered rings	Ring descriptors
nR09	number of 9-membered rings	Ring descriptors
nR10	number of 10-membered rings	Ring descriptors
nR11	number of 11-membered rings	Ring descriptors
nR12	number of 12-membered rings	Ring descriptors
nBnz	number of benzene-like rings	Ring descriptors
ARR	aromatic ratio	Ring descriptors
AP	aromatic proportion	Ring descriptors
D/Dtr03	distance/detour ring index of order 3	Ring descriptors
D/Dtr04	distance/detour ring index of order 4	Ring descriptors
D/Dtr05	distance/detour ring index of order 5	Ring descriptors
D/Dtr06	distance/detour ring index of order 6	Ring descriptors
D/Dtr07	distance/detour ring index of order 7	Ring descriptors
D/Dtr08	distance/detour ring index of order 8	Ring descriptors
D/Dtr09	distance/detour ring index of order 9	Ring descriptors
D/Dtr10	distance/detour ring index of order 10	Ring descriptors
D/Dtr11	distance/detour ring index of order 11	Ring descriptors
D/Dtr12	distance/detour ring index of order 12	Ring descriptors
ZM1	first Zagreb index	Topological indices
ZM1V	first Zagreb index by valence vertex degrees	Topological indices
ZM1Kup	first Zagreb index by Kupchik vertex degrees	Topological indices
ZM1Mad	first Zagreb index by Madan vertex degrees	Topological indices
ZM1Per	first Zagreb index by perturbation vertex degrees	Topological indices
ZM1MulPer	first Zagreb index by multiplicative perturbation vertex degrees	Topological indices
ZM2	second Zagreb index	Topological indices
ZM2V	second Zagreb index by valence vertex degrees	Topological indices
ZM2Kup	second Zagreb index by Kupchik vertex degrees	Topological indices
ZM2Mad	second Zagreb index by Madan vertex degrees	Topological indices
ZM2Per	second Zagreb index by perturbation vertex degrees	Topological indices
ZM2MulPer	second Zagreb index by multiplicative perturbation vertex degrees	Topological indices
ON0	overall modified Zagreb index of order 0	Topological indices
ON0V	overall modified Zagreb index of order 0 by valence vertex degrees	Topological indices
ON1	overall modified Zagreb index of order 1	Topological indices
ON1V	overall modified Zagreb index of order 1 by valence vertex degrees	Topological indices
Qindex	quadratic index	Topological indices
BBI	Bertz branching index	Topological indices
DBI	Dragon branching index	Topological indices
SNar	Narumi simple topological index (log function)	Topological indices
HNar	Narumi harmonic topological index	Topological indices
GNar	Narumi geometric topological index	Topological indices
Xt	total structure connectivity index	Topological indices
Dz	Pogliani index	Topological indices
Ram	ramification index	Topological indices
BLI	Kier benzene-likeliness index	Topological indices
Pol	polarity number	Topological indices
LPRS	log of product of row sums (PRS)	Topological indices
MSD	mean square distance index (Balaban)	Topological indices
SPI	superpendentic index	Topological indices
PJI2	2D Petitjean shape index	Topological indices
ECC	eccentricity	Topological indices
AECC	average eccentricity	Topological indices
DECC	eccentric	Topological indices
MDDD	mean distance degree deviation	Topological indices
UNIP	unipolarity	Topological indices
CENT	centralization	Topological indices
VAR	variation	Topological indices
ICR	radial centric information index	Topological indices
MaxTD	max topological distance	Topological indices
MeanTD	mean pairwise topological distance	Topological indices
MaxDD	max detour distance	Topological indices
MeanDD	mean pairwise detour distance	Topological indices
SMTI	Schultz Molecular Topological Index (MTI)	Topological indices
SMTIV	Schultz Molecular Topological Index by valence vertex degrees	Topological indices
GMTI	Gutman Molecular Topological Index	Topological indices
GMTIV	Gutman Molecular Topological Index by valence vertex degrees	Topological indices
Xu	Xu index	Topological indices
CSI	eccentric connectivity index	Topological indices
Wap	all-path Wiener index	Topological indices
S1K	1-path Kier alpha-modified shape index	Topological indices
S2K	2-path Kier alpha-modified shape index	Topological indices
S3K	3-path Kier alpha-modified shape index	Topological indices
PHI	Kier flexibility index	Topological indices
PW2	path/walk 2 - Randic shape index	Topological indices
PW3	path/walk 3 - Randic shape index	Topological indices
PW4	path/walk 4 - Randic shape index	Topological indices
PW5	path/walk 5 - Randic shape index	Topological indices
MAXDN	maximal electrotopological negative variation	Topological indices
MAXDP	maximal electrotopological positive variation	Topological indices
DELS	molecular electrotopological variation	Topological indices
TIE	E-state topological parameter	Topological indices
Psi_i_s	intrinsic state pseudoconnectivity index - type S	Topological indices
Psi_i_A	intrinsic state pseudoconnectivity index - type S average	Topological indices
Psi_i_0	intrinsic state pseudoconnectivity index - type 0	Topological indices
Psi_i_1	intrinsic state pseudoconnectivity index - type 1	Topological indices
Psi_i_t	intrinsic state pseudoconnectivity index - type T	Topological indices
Psi_i_0d	intrinsic state pseudoconnectivity index - type 0d	Topological indices
Psi_i_1d	intrinsic state pseudoconnectivity index - type 1d	Topological indices
Psi_i_1s	intrinsic state pseudoconnectivity index - type 1s	Topological indices
Psi_e_A	electrotopological state pseudoconnectivity index - type S average	Topological indices
Psi_e_0	electrotopological state pseudoconnectivity index - type 0	Topological indices
Psi_e_1	electrotopological state pseudoconnectivity index - type 1	Topological indices
Psi_e_t	electrotopological state pseudoconnectivity index - type T	Topological indices
Psi_e_0d	electrotopological state pseudoconnectivity index - type 0d	Topological indices
Psi_e_1d	electrotopological state pseudoconnectivity index - type 1d	Topological indices
Psi_e_1s	electrotopological state pseudoconnectivity index - type 1s	Topological indices
BAC	Balaban centric index	Topological indices
LOC	lopping centric index	Topological indices
MWC01	molecular walk count of order 1	Walk and path counts
MWC02	molecular walk count of order 2	Walk and path counts
MWC03	molecular walk count of order 3	Walk and path counts
MWC04	molecular walk count of order 4	Walk and path counts
MWC05	molecular walk count of order 5	Walk and path counts
MWC06	molecular walk count of order 6	Walk and path counts
MWC07	molecular walk count of order 7	Walk and path counts
MWC08	molecular walk count of order 8	Walk and path counts
MWC09	molecular walk count of order 9	Walk and path counts
MWC10	molecular walk count of order 10	Walk and path counts
SRW02	self-returning walk count of order 2	Walk and path counts
SRW03	self-returning walk count of order 3	Walk and path counts
SRW04	self-returning walk count of order 4	Walk and path counts
SRW05	self-returning walk count of order 5	Walk and path counts
SRW06	self-returning walk count of order 6	Walk and path counts
SRW07	self-returning walk count of order 7	Walk and path counts
SRW08	self-returning walk count of order 8	Walk and path counts
SRW09	self-returning walk count of order 9	Walk and path counts
SRW10	self-returning walk count of order 10	Walk and path counts
MPC01	molecular path count of order 1 (no. of non-H bonds)	Walk and path counts
MPC02	molecular path count of order 2 (Gordon-Scantlebury index)	Walk and path counts
MPC03	molecular path count of order 3	Walk and path counts
MPC04	molecular path count of order 4	Walk and path counts
MPC05	molecular path count of order 5	Walk and path counts
MPC06	molecular path count of order 6	Walk and path counts
MPC07	molecular path count of order 7	Walk and path counts
MPC08	molecular path count of order 8	Walk and path counts
MPC09	molecular path count of order 9	Walk and path counts
MPC10	molecular path count of order 10	Walk and path counts
piPC01	molecular multiple path count of order 1	Walk and path counts
piPC02	molecular multiple path count of order 2	Walk and path counts
piPC03	molecular multiple path count of order 3	Walk and path counts
piPC04	molecular multiple path count of order 4	Walk and path counts
piPC05	molecular multiple path count of order 5	Walk and path counts
piPC06	molecular multiple path count of order 6	Walk and path counts
piPC07	molecular multiple path count of order 7	Walk and path counts
piPC08	molecular multiple path count of order 8	Walk and path counts
piPC09	molecular multiple path count of order 9	Walk and path counts
piPC10	molecular multiple path count of order 10	Walk and path counts
TWC	total walk count	Walk and path counts
TPC	total path count	Walk and path counts
piID	conventional bond order ID number	Walk and path counts
PCR	ratio of multiple path count over path count	Walk and path counts
PCD	difference between multiple path count and path count	Walk and path counts
CID	Randic ID number	Walk and path counts
BID	Balaban ID number	Walk and path counts
X0	connectivity index of order 0	Connectivity indices
X1	connectivity index of order 1 (Randic connectivity index)	Connectivity indices
X2	connectivity index of order 2	Connectivity indices
X3	connectivity index of order 3	Connectivity indices
X4	connectivity index of order 4	Connectivity indices
X5	connectivity index of order 5	Connectivity indices
X0A	average connectivity index of order 0	Connectivity indices
X1A	average connectivity index of order 1	Connectivity indices
X2A	average connectivity index of order 2	Connectivity indices
X3A	average connectivity index of order 3	Connectivity indices
X4A	average connectivity index of order 4	Connectivity indices
X5A	average connectivity index of order 5	Connectivity indices
X0v	valence connectivity index of order 0	Connectivity indices
X1v	valence connectivity index of order 1	Connectivity indices
X2v	valence connectivity index of order 2	Connectivity indices
X3v	valence connectivity index of order 3	Connectivity indices
X4v	valence connectivity index of order 4	Connectivity indices
X5v	valence connectivity index of order 5	Connectivity indices
X0Av	average valence connectivity index of order 0	Connectivity indices
X1Av	average valence connectivity index of order 1	Connectivity indices
X2Av	average valence connectivity index of order 2	Connectivity indices
X3Av	average valence connectivity index of order 3	Connectivity indices
X4Av	average valence connectivity index of order 4	Connectivity indices
X5Av	average valence connectivity index of order 5	Connectivity indices
X0sol	solvation connectivity index of order 0	Connectivity indices
X1sol	solvation connectivity index of order 1	Connectivity indices
X2sol	solvation connectivity index of order 2	Connectivity indices
X3sol	solvation connectivity index of order 3	Connectivity indices
X4sol	solvation connectivity index of order 4	Connectivity indices
X5sol	solvation connectivity index of order 5	Connectivity indices
XMOD	modified Randic index	Connectivity indices
RDCHI	reciprocal distance sum Randic-like index	Connectivity indices
RDSQ	reciprocal distance sum inverse Randic-like index	Connectivity indices
X1Kup	Kupchik connectivity index	Connectivity indices
X1Mad	connectivity topochemical index	Connectivity indices
X1Per	perturbation connectivity index	Connectivity indices
X1MulPer	multiplicative perturbation connectivity index	Connectivity indices
ISIZ	information index on molecular size	Information indices
IAC	total information index on atomic composition	Information indices
AAC	mean information index on atomic composition	Information indices
IDE	mean information content on the distance equality	Information indices
IDM	mean information content on the distance magnitude	Information indices
IDDE	mean information content on the distance degree equality	Information indices
IDDM	mean information content on the distance degree magnitude	Information indices
IDET	total information content on the distance equality	Information indices
IDMT	total information content on the distance magnitude	Information indices
IVDE	mean information content on the vertex degree equality	Information indices
IVDM	mean information content on the vertex degree magnitude	Information indices
Ges	Number of symmetry classes (based on electrotopological state)	Information indices
rGes	Relative number of symmetry classes (based on electrotopological state)	Information indices
S0K	Kier symmetry index	Information indices
HVcpx	graph vertex complexity index	Information indices
HDcpx	graph distance complexity index (log function)	Information indices
Uindex	Balaban U index	Information indices
Vindex	Balaban V index	Information indices
Xindex	Balaban X index	Information indices
Yindex	Balaban Y index	Information indices
BertzCT	Bertz complexity index	Information indices
IC0	Information Content index (neighborhood symmetry of 0-order)	Information indices
IC1	Information Content index (neighborhood symmetry of 1-order)	Information indices
IC2	Information Content index (neighborhood symmetry of 2-order)	Information indices
IC3	Information Content index (neighborhood symmetry of 3-order)	Information indices
IC4	Information Content index (neighborhood symmetry of 4-order)	Information indices
IC5	Information Content index (neighborhood symmetry of 5-order)	Information indices
TIC0	Total Information Content index (neighborhood symmetry of 0-order)	Information indices
TIC1	Total Information Content index (neighborhood symmetry of 1-order)	Information indices
TIC2	Total Information Content index (neighborhood symmetry of 2-order)	Information indices
TIC3	Total Information Content index (neighborhood symmetry of 3-order)	Information indices
TIC4	Total Information Content index (neighborhood symmetry of 4-order)	Information indices
TIC5	Total Information Content index (neighborhood symmetry of 5-order)	Information indices
SIC0	Structural Information Content index (neighborhood symmetry of 0-order)	Information indices
SIC1	Structural Information Content index (neighborhood symmetry of 1-order)	Information indices
SIC2	Structural Information Content index (neighborhood symmetry of 2-order)	Information indices
SIC3	Structural Information Content index (neighborhood symmetry of 3-order)	Information indices
SIC4	Structural Information Content index (neighborhood symmetry of 4-order)	Information indices
SIC5	Structural Information Content index (neighborhood symmetry of 5-order)	Information indices
CIC0	Complementary Information Content index (neighborhood symmetry of 0-order)	Information indices
CIC1	Complementary Information Content index (neighborhood symmetry of 1-order)	Information indices
CIC2	Complementary Information Content index (neighborhood symmetry of 2-order)	Information indices
CIC3	Complementary Information Content index (neighborhood symmetry of 3-order)	Information indices
CIC4	Complementary Information Content index (neighborhood symmetry of 4-order)	Information indices
CIC5	Complementary Information Content index (neighborhood symmetry of 5-order)	Information indices
BIC0	Bond Information Content index (neighborhood symmetry of 0-order)	Information indices
BIC1	Bond Information Content index (neighborhood symmetry of 1-order)	Information indices
BIC2	Bond Information Content index (neighborhood symmetry of 2-order)	Information indices
BIC3	Bond Information Content index (neighborhood symmetry of 3-order)	Information indices
BIC4	Bond Information Content index (neighborhood symmetry of 4-order)	Information indices
BIC5	Bond Information Content index (neighborhood symmetry of 5-order)	Information indices
J_A	Balaban-like index from adjacency matrix	2D matrix-based descriptors
SpPos_A	spectral positive sum from adjacency matrix	2D matrix-based descriptors
SpPosA_A	normalized spectral positive sum from adjacency matrix	2D matrix-based descriptors
SpPosLog_A	logarithmic spectral positive sum from adjacency matrix	2D matrix-based descriptors
SpMax_A	leading eigenvalue from adjacency matrix (Lovasz-Pelikan index)	2D matrix-based descriptors
SpMaxA_A	normalized leading eigenvalue from adjacency matrix	2D matrix-based descriptors
SpDiam_A	spectral diameter from adjacency matrix	2D matrix-based descriptors
SpAD_A	spectral absolute deviation from adjacency matrix	2D matrix-based descriptors
SpMAD_A	spectral mean absolute deviation from adjacency matrix	2D matrix-based descriptors
Ho_A	Hosoya-like index (log function) from adjacency matrix	2D matrix-based descriptors
EE_A	Estrada-like index (log function) from adjacency matrix	2D matrix-based descriptors
VE1_A	coefficient sum of the last eigenvector (absolute values) from adjacency matrix	2D matrix-based descriptors
VE2_A	average coefficient of the last eigenvector (absolute values) from adjacency matrix	2D matrix-based descriptors
VE3_A	logarithmic coefficient sum of the last eigenvector (absolute values) from adjacency matrix	2D matrix-based descriptors
VE1sign_A	coefficient sum of the last eigenvector from adjacency matrix	2D matrix-based descriptors
VE2sign_A	average coefficient of the last eigenvector from adjacency matrix	2D matrix-based descriptors
VE3sign_A	logarithmic coefficient sum of the last eigenvector from adjacency matrix	2D matrix-based descriptors
VR1_A	Randic-like eigenvector-based index from adjacency matrix	2D matrix-based descriptors
VR2_A	normalized Randic-like eigenvector-based index from adjacency matrix	2D matrix-based descriptors
VR3_A	logarithmic Randic-like eigenvector-based index from adjacency matrix	2D matrix-based descriptors
Wi_D	Wiener-like index from topological distance matrix (Wiener index)	2D matrix-based descriptors
WiA_D	average Wiener-like index from topological distance matrix	2D matrix-based descriptors
AVS_D	average vertex sum from topological distance matrix	2D matrix-based descriptors
H_D	Harary-like index from topological distance matrix (Harary index)	2D matrix-based descriptors
Chi_D	Randic-like index from topological distance matrix	2D matrix-based descriptors
ChiA_D	average Randic-like index from topological distance matrix	2D matrix-based descriptors
J_D	Balaban-like index from topological distance matrix (Balaban distance connectivity index)	2D matrix-based descriptors
HyWi_D	hyper-Wiener-like index (log function) from topological distance matrix	2D matrix-based descriptors
SpPos_D	spectral positive sum from topological distance matrix	2D matrix-based descriptors
SpPosA_D	normalized spectral positive sum from topological distance matrix	2D matrix-based descriptors
SpPosLog_D	logarithmic spectral positive sum from topological distance matrix	2D matrix-based descriptors
SpMax_D	leading eigenvalue from topological distance matrix	2D matrix-based descriptors
SpMaxA_D	normalized leading eigenvalue from topological distance matrix	2D matrix-based descriptors
SpDiam_D	spectral diameter from topological distance matrix	2D matrix-based descriptors
SpAD_D	spectral absolute deviation from topological distance matrix	2D matrix-based descriptors
SpMAD_D	spectral mean absolute deviation from topological distance matrix	2D matrix-based descriptors
Ho_D	Hosoya-like index (log function) from topological distance matrix	2D matrix-based descriptors
EE_D	Estrada-like index (log function) from topological distance matrix	2D matrix-based descriptors
SM2_D	spectral moment of order 2 from topological distance matrix	2D matrix-based descriptors
SM3_D	spectral moment of order 3 from topological distance matrix	2D matrix-based descriptors
SM4_D	spectral moment of order 4 from topological distance matrix	2D matrix-based descriptors
SM5_D	spectral moment of order 5 from topological distance matrix	2D matrix-based descriptors
SM6_D	spectral moment of order 6 from topological distance matrix	2D matrix-based descriptors
VE1_D	coefficient sum of the last eigenvector (absolute values) from topological distance matrix	2D matrix-based descriptors
VE2_D	average coefficient of the last eigenvector (absolute values) from topological distance matrix	2D matrix-based descriptors
VE3_D	logarithmic coefficient sum of the last eigenvector (absolute values) from topological distance matrix	2D matrix-based descriptors
VE1sign_D	coefficient sum of the last eigenvector from topological distance matrix	2D matrix-based descriptors
VE2sign_D	average coefficient of the last eigenvector from topological distance matrix	2D matrix-based descriptors
VE3sign_D	logarithmic coefficient sum of the last eigenvector from topological distance matrix	2D matrix-based descriptors
VR1_D	Randic-like eigenvector-based index from topological distance matrix	2D matrix-based descriptors
VR2_D	normalized Randic-like eigenvector-based index from topological distance matrix	2D matrix-based descriptors
VR3_D	logarithmic Randic-like eigenvector-based index from topological distance matrix	2D matrix-based descriptors
Acon	algebraic connectivity (also known as Fiedler value or Fiedler eigenvalue)	2D matrix-based descriptors
QW_L	quasi-Wiener index (Kirchhoff number) from Laplace matrix	2D matrix-based descriptors
TI1_L	first Mohar index from Laplace matrix	2D matrix-based descriptors
TI2_L	second Mohar index from Laplace matrix	2D matrix-based descriptors
STN_L	spanning tree number (log function) from Laplace matrix	2D matrix-based descriptors
SpPos_L	spectral positive sum from Laplace matrix	2D matrix-based descriptors
SpPosA_L	normalized spectral positive sum from Laplace matrix	2D matrix-based descriptors
SpPosLog_L	logarithmic spectral positive sum from Laplace matrix	2D matrix-based descriptors
SpMax_L	leading eigenvalue from Laplace matrix	2D matrix-based descriptors
SpMaxA_L	normalized leading eigenvalue from Laplace matrix	2D matrix-based descriptors
SpDiam_L	spectral diameter from Laplace matrix	2D matrix-based descriptors
SpAD_L	spectral absolute deviation from Laplace matrix	2D matrix-based descriptors
SpMAD_L	spectral mean absolute deviation from Laplace matrix	2D matrix-based descriptors
Ho_L	Hosoya-like index (log function) from Laplace matrix	2D matrix-based descriptors
EE_L	Estrada-like index (log function) from Laplace matrix	2D matrix-based descriptors
SM2_L	spectral moment of order 2 from Laplace matrix	2D matrix-based descriptors
SM3_L	spectral moment of order 3 from Laplace matrix	2D matrix-based descriptors
SM4_L	spectral moment of order 4 from Laplace matrix	2D matrix-based descriptors
SM5_L	spectral moment of order 5 from Laplace matrix	2D matrix-based descriptors
SM6_L	spectral moment of order 6 from Laplace matrix	2D matrix-based descriptors
VE1_L	coefficient sum of the last eigenvector (absolute values) from Laplace matrix	2D matrix-based descriptors
VE2_L	average coefficient of the last eigenvector (absolute values) from Laplace matrix	2D matrix-based descriptors
VE3_L	logarithmic coefficient sum of the last eigenvector (absolute values) from Laplace matrix	2D matrix-based descriptors
VE1sign_L	coefficient sum of the last eigenvector from Laplace matrix	2D matrix-based descriptors
VE2sign_L	average coefficient of the last eigenvector from Laplace matrix	2D matrix-based descriptors
VE3sign_L	logarithmic coefficient sum of the last eigenvector from Laplace matrix	2D matrix-based descriptors
VR1_L	Randic-like eigenvector-based index from Laplace matrix	2D matrix-based descriptors
VR2_L	normalized Randic-like eigenvector-based index from Laplace matrix	2D matrix-based descriptors
VR3_L	logarithmic Randic-like eigenvector-based index from Laplace matrix	2D matrix-based descriptors
AVS_X	average vertex sum from chi matrix	2D matrix-based descriptors
H_X	Harary-like index from chi matrix	2D matrix-based descriptors
Chi_X	Randic-like index from chi matrix	2D matrix-based descriptors
ChiA_X	average Randic-like index from chi matrix	2D matrix-based descriptors
J_X	Balaban-like index from chi matrix	2D matrix-based descriptors
HyWi_X	hyper-Wiener-like index (log function) from chi matrix	2D matrix-based descriptors
SpPos_X	spectral positive sum from chi matrix	2D matrix-based descriptors
SpPosA_X	normalized spectral positive sum from chi matrix	2D matrix-based descriptors
SpPosLog_X	logarithmic spectral positive sum from chi matrix	2D matrix-based descriptors
SpMax_X	leading eigenvalue from chi matrix	2D matrix-based descriptors
SpMaxA_X	normalized leading eigenvalue from chi matrix	2D matrix-based descriptors
SpDiam_X	spectral diameter from chi matrix	2D matrix-based descriptors
SpAD_X	spectral absolute deviation from chi matrix	2D matrix-based descriptors
SpMAD_X	spectral mean absolute deviation from chi matrix	2D matrix-based descriptors
Ho_X	Hosoya-like index (log function) from chi matrix	2D matrix-based descriptors
EE_X	Estrada-like index (log function) from chi matrix	2D matrix-based descriptors
SM2_X	spectral moment of order 2 from chi matrix	2D matrix-based descriptors
SM3_X	spectral moment of order 3 from chi matrix	2D matrix-based descriptors
SM4_X	spectral moment of order 4 from chi matrix	2D matrix-based descriptors
SM5_X	spectral moment of order 5 from chi matrix	2D matrix-based descriptors
SM6_X	spectral moment of order 6 from chi matrix	2D matrix-based descriptors
VE1_X	coefficient sum of the last eigenvector (absolute values) from chi matrix	2D matrix-based descriptors
VE2_X	average coefficient of the last eigenvector (absolute values) from chi matrix	2D matrix-based descriptors
VE3_X	logarithmic coefficient sum of the last eigenvector (absolute values) from chi matrix	2D matrix-based descriptors
VE1sign_X	coefficient sum of the last eigenvector from chi matrix	2D matrix-based descriptors
VE2sign_X	average coefficient of the last eigenvector from chi matrix	2D matrix-based descriptors
VE3sign_X	logarithmic coefficient sum of the last eigenvector from chi matrix	2D matrix-based descriptors
VR1_X	Randic-like eigenvector-based index from chi matrix	2D matrix-based descriptors
VR2_X	normalized Randic-like eigenvector-based index from chi matrix	2D matrix-based descriptors
VR3_X	logarithmic Randic-like eigenvector-based index from chi matrix	2D matrix-based descriptors
Wi_H2	Wiener-like index from reciprocal squared distance matrix	2D matrix-based descriptors
WiA_H2	average Wiener-like index from reciprocal squared distance matrix	2D matrix-based descriptors
AVS_H2	average vertex sum from reciprocal squared distance matrix	2D matrix-based descriptors
Chi_H2	Randic-like index from reciprocal squared distance matrix	2D matrix-based descriptors
ChiA_H2	average Randic-like index from reciprocal squared distance matrix	2D matrix-based descriptors
J_H2	Balaban-like index from reciprocal squared distance matrix	2D matrix-based descriptors
HyWi_H2	hyper-Wiener-like index (log function) from reciprocal squared distance matrix	2D matrix-based descriptors
SpPos_H2	spectral positive sum from reciprocal squared distance matrix	2D matrix-based descriptors
SpPosA_H2	normalized spectral positive sum from reciprocal squared distance matrix	2D matrix-based descriptors
SpPosLog_H2	logarithmic spectral positive sum from reciprocal squared distance matrix	2D matrix-based descriptors
SpMax_H2	leading eigenvalue from reciprocal squared distance matrix	2D matrix-based descriptors
SpMaxA_H2	normalized leading eigenvalue from reciprocal squared distance matrix	2D matrix-based descriptors
SpDiam_H2	spectral diameter from reciprocal squared distance matrix	2D matrix-based descriptors
SpAD_H2	spectral absolute deviation from reciprocal squared distance matrix	2D matrix-based descriptors
SpMAD_H2	spectral mean absolute deviation from reciprocal squared distance matrix	2D matrix-based descriptors
Ho_H2	Hosoya-like index (log function) from reciprocal squared distance matrix	2D matrix-based descriptors
EE_H2	Estrada-like index (log function) from reciprocal squared distance matrix	2D matrix-based descriptors
SM2_H2	spectral moment of order 2 from reciprocal squared distance matrix	2D matrix-based descriptors
SM3_H2	spectral moment of order 3 from reciprocal squared distance matrix	2D matrix-based descriptors
SM4_H2	spectral moment of order 4 from reciprocal squared distance matrix	2D matrix-based descriptors
SM5_H2	spectral moment of order 5 from reciprocal squared distance matrix	2D matrix-based descriptors
SM6_H2	spectral moment of order 6 from reciprocal squared distance matrix	2D matrix-based descriptors
VE1_H2	coefficient sum of the last eigenvector (absolute values) from reciprocal squared distance matrix	2D matrix-based descriptors
VE2_H2	average coefficient of the last eigenvector (absolute values) from reciprocal squared distance matrix	2D matrix-based descriptors
VE3_H2	logarithmic coefficient sum of the last eigenvector (absolute values) from reciprocal squared distance matrix	2D matrix-based descriptors
VE1sign_H2	coefficient sum of the last eigenvector from reciprocal squared distance matrix	2D matrix-based descriptors
VE2sign_H2	average coefficient of the last eigenvector from reciprocal squared distance matrix	2D matrix-based descriptors
VE3sign_H2	logarithmic coefficient sum of the last eigenvector from reciprocal squared distance matrix	2D matrix-based descriptors
VR1_H2	Randic-like eigenvector-based index from reciprocal squared distance matrix	2D matrix-based descriptors
VR2_H2	normalized Randic-like eigenvector-based index from reciprocal squared distance matrix	2D matrix-based descriptors
VR3_H2	logarithmic Randic-like eigenvector-based index from reciprocal squared distance matrix	2D matrix-based descriptors
Wi_Dt	Wiener-like index from detour matrix (detour index)	2D matrix-based descriptors
WiA_Dt	average Wiener-like index from detour matrix	2D matrix-based descriptors
AVS_Dt	average vertex sum from detour matrix	2D matrix-based descriptors
H_Dt	Harary-like index from detour matrix	2D matrix-based descriptors
Chi_Dt	Randic-like index from detour matrix	2D matrix-based descriptors
ChiA_Dt	average Randic-like index from detour matrix	2D matrix-based descriptors
J_Dt	Balaban-like index from detour matrix	2D matrix-based descriptors
HyWi_Dt	hyper-Wiener-like index (log function) from detour matrix	2D matrix-based descriptors
SpPos_Dt	spectral positive sum from detour matrix	2D matrix-based descriptors
SpPosA_Dt	normalized spectral positive sum from detour matrix	2D matrix-based descriptors
SpPosLog_Dt	logarithmic spectral positive sum from detour matrix	2D matrix-based descriptors
SpMax_Dt	leading eigenvalue from detour matrix	2D matrix-based descriptors
SpMaxA_Dt	normalized leading eigenvalue from detour matrix	2D matrix-based descriptors
SpDiam_Dt	spectral diameter from detour matrix	2D matrix-based descriptors
SpAD_Dt	spectral absolute deviation from detour matrix	2D matrix-based descriptors
SpMAD_Dt	spectral mean absolute deviation from detour matrix	2D matrix-based descriptors
Ho_Dt	Hosoya-like index (log function) from detour matrix	2D matrix-based descriptors
EE_Dt	Estrada-like index (log function) from detour matrix	2D matrix-based descriptors
SM2_Dt	spectral moment of order 2 from detour matrix	2D matrix-based descriptors
SM3_Dt	spectral moment of order 3 from detour matrix	2D matrix-based descriptors
SM4_Dt	spectral moment of order 4 from detour matrix	2D matrix-based descriptors
SM5_Dt	spectral moment of order 5 from detour matrix	2D matrix-based descriptors
SM6_Dt	spectral moment of order 6 from detour matrix	2D matrix-based descriptors
VE1_Dt	coefficient sum of the last eigenvector (absolute values) from detour matrix	2D matrix-based descriptors
VE2_Dt	average coefficient of the last eigenvector (absolute values) from detour matrix	2D matrix-based descriptors
VE3_Dt	logarithmic coefficient sum of the last eigenvector (absolute values) from detour matrix	2D matrix-based descriptors
VE1sign_Dt	coefficient sum of the last eigenvector from detour matrix	2D matrix-based descriptors
VE2sign_Dt	average coefficient of the last eigenvector from detour matrix	2D matrix-based descriptors
VE3sign_Dt	logarithmic coefficient sum of the last eigenvector from detour matrix	2D matrix-based descriptors
VR1_Dt	Randic-like eigenvector-based index from detour matrix	2D matrix-based descriptors
VR2_Dt	normalized Randic-like eigenvector-based index from detour matrix	2D matrix-based descriptors
VR3_Dt	logarithmic Randic-like eigenvector-based index from detour matrix	2D matrix-based descriptors
Wi_D/Dt	Wiener-like index from distance/detour matrix	2D matrix-based descriptors
WiA_D/Dt	average Wiener-like index from distance/detour matrix	2D matrix-based descriptors
AVS_D/Dt	average vertex sum from distance/detour matrix	2D matrix-based descriptors
H_D/Dt	Harary-like index from distance/detour matrix	2D matrix-based descriptors
Chi_D/Dt	Randic-like index from distance/detour matrix	2D matrix-based descriptors
ChiA_D/Dt	average Randic-like index from distance/detour matrix	2D matrix-based descriptors
J_D/Dt	Balaban-like index from distance/detour matrix	2D matrix-based descriptors
HyWi_D/Dt	hyper-Wiener-like index (log function) from distance/detour matrix	2D matrix-based descriptors
SpPos_D/Dt	spectral positive sum from distance/detour matrix	2D matrix-based descriptors
SpPosA_D/Dt	normalized spectral positive sum from distance/detour matrix	2D matrix-based descriptors
SpPosLog_D/Dt	logarithmic spectral positive sum from distance/detour matrix	2D matrix-based descriptors
SpMax_D/Dt	leading eigenvalue from distance/detour matrix	2D matrix-based descriptors
SpMaxA_D/Dt	normalized leading eigenvalue from distance/detour matrix	2D matrix-based descriptors
SpDiam_D/Dt	spectral diameter from distance/detour matrix	2D matrix-based descriptors
SpAD_D/Dt	spectral absolute deviation from distance/detour matrix	2D matrix-based descriptors
SpMAD_D/Dt	spectral mean absolute deviation from distance/detour matrix	2D matrix-based descriptors
Ho_D/Dt	Hosoya-like index (log function) from distance/detour matrix	2D matrix-based descriptors
EE_D/Dt	Estrada-like index (log function) from distance/detour matrix	2D matrix-based descriptors
SM2_D/Dt	spectral moment of order 2 from distance/detour matrix	2D matrix-based descriptors
SM3_D/Dt	spectral moment of order 3 from distance/detour matrix	2D matrix-based descriptors
SM4_D/Dt	spectral moment of order 4 from distance/detour matrix	2D matrix-based descriptors
SM5_D/Dt	spectral moment of order 5 from distance/detour matrix	2D matrix-based descriptors
SM6_D/Dt	spectral moment of order 6 from distance/detour matrix	2D matrix-based descriptors
VE1_D/Dt	coefficient sum of the last eigenvector (absolute values) from distance/detour matrix	2D matrix-based descriptors
VE2_D/Dt	average coefficient of the last eigenvector (absolute values) from distance/detour matrix	2D matrix-based descriptors
VE3_D/Dt	logarithmic coefficient sum of the last eigenvector (absolute values) from distance/detour matrix	2D matrix-based descriptors
VE1sign_D/Dt	coefficient sum of the last eigenvector from distance/detour matrix	2D matrix-based descriptors
VE2sign_D/Dt	average coefficient of the last eigenvector from distance/detour matrix	2D matrix-based descriptors
VE3sign_D/Dt	logarithmic coefficient sum of the last eigenvector from distance/detour matrix	2D matrix-based descriptors
VR1_D/Dt	Randic-like eigenvector-based index from distance/detour matrix	2D matrix-based descriptors
VR2_D/Dt	normalized Randic-like eigenvector-based index from distance/detour matrix	2D matrix-based descriptors
VR3_D/Dt	logarithmic Randic-like eigenvector-based index from distance/detour matrix	2D matrix-based descriptors
Wi_Dz(Z)	Wiener-like index from Barysz matrix weighted by atomic number	2D matrix-based descriptors
WiA_Dz(Z)	average Wiener-like index from Barysz matrix weighted by atomic number	2D matrix-based descriptors
AVS_Dz(Z)	average vertex sum from Barysz matrix weighted by atomic number	2D matrix-based descriptors
H_Dz(Z)	Harary-like index from Barysz matrix weighted by atomic number	2D matrix-based descriptors
Chi_Dz(Z)	Randic-like index from Barysz matrix weighted by atomic number	2D matrix-based descriptors
ChiA_Dz(Z)	average Randic-like index from Barysz matrix weighted by atomic number	2D matrix-based descriptors
J_Dz(Z)	Balaban-like index from Barysz matrix weighted by atomic number	2D matrix-based descriptors
HyWi_Dz(Z)	hyper-Wiener-like index (log function) from Barysz matrix weighted by atomic number	2D matrix-based descriptors
SpAbs_Dz(Z)	graph energy from Barysz matrix weighted by atomic number	2D matrix-based descriptors
SpPos_Dz(Z)	spectral positive sum from Barysz matrix weighted by atomic number	2D matrix-based descriptors
SpPosA_Dz(Z)	normalized spectral positive sum from Barysz matrix weighted by atomic number	2D matrix-based descriptors
SpPosLog_Dz(Z)	logarithmic spectral positive sum from Barysz matrix weighted by atomic number	2D matrix-based descriptors
SpMax_Dz(Z)	leading eigenvalue from Barysz matrix weighted by atomic number	2D matrix-based descriptors
SpMaxA_Dz(Z)	normalized leading eigenvalue from Barysz matrix weighted by atomic number	2D matrix-based descriptors
SpDiam_Dz(Z)	spectral diameter from Barysz matrix weighted by atomic number	2D matrix-based descriptors
SpAD_Dz(Z)	spectral absolute deviation from Barysz matrix weighted by atomic number	2D matrix-based descriptors
SpMAD_Dz(Z)	spectral mean absolute deviation from Barysz matrix weighted by atomic number	2D matrix-based descriptors
Ho_Dz(Z)	Hosoya-like index (log function) from Barysz matrix weighted by atomic number	2D matrix-based descriptors
EE_Dz(Z)	Estrada-like index (log function) from Barysz matrix weighted by atomic number	2D matrix-based descriptors
SM1_Dz(Z)	spectral moment of order 1 from Barysz matrix weighted by atomic number	2D matrix-based descriptors
SM2_Dz(Z)	spectral moment of order 2 from Barysz matrix weighted by atomic number	2D matrix-based descriptors
SM3_Dz(Z)	spectral moment of order 3 from Barysz matrix weighted by atomic number	2D matrix-based descriptors
SM4_Dz(Z)	spectral moment of order 4 from Barysz matrix weighted by atomic number	2D matrix-based descriptors
SM5_Dz(Z)	spectral moment of order 5 from Barysz matrix weighted by atomic number	2D matrix-based descriptors
SM6_Dz(Z)	spectral moment of order 6 from Barysz matrix weighted by atomic number	2D matrix-based descriptors
VE1_Dz(Z)	coefficient sum of the last eigenvector (absolute values) from Barysz matrix weighted by atomic number	2D matrix-based descriptors
VE2_Dz(Z)	average coefficient of the last eigenvector (absolute values) from Barysz matrix weighted by atomic number	2D matrix-based descriptors
VE3_Dz(Z)	logarithmic coefficient sum of the last eigenvector (absolute values) from Barysz matrix weighted by atomic number	2D matrix-based descriptors
VE1sign_Dz(Z)	coefficient sum of the last eigenvector from Barysz matrix weighted by atomic number	2D matrix-based descriptors
VE2sign_Dz(Z)	average coefficient of the last eigenvector from Barysz matrix weighted by atomic number	2D matrix-based descriptors
VE3sign_Dz(Z)	logarithmic coefficient sum of the last eigenvector from Barysz matrix weighted by atomic number	2D matrix-based descriptors
VR1_Dz(Z)	Randic-like eigenvector-based index from Barysz matrix weighted by atomic number	2D matrix-based descriptors
VR2_Dz(Z)	normalized Randic-like eigenvector-based index from Barysz matrix weighted by atomic number	2D matrix-based descriptors
VR3_Dz(Z)	logarithmic Randic-like eigenvector-based index from Barysz matrix weighted by atomic number	2D matrix-based descriptors
Wi_Dz(m)	Wiener-like index from Barysz matrix weighted by mass	2D matrix-based descriptors
WiA_Dz(m)	average Wiener-like index from Barysz matrix weighted by mass	2D matrix-based descriptors
AVS_Dz(m)	average vertex sum from Barysz matrix weighted by mass	2D matrix-based descriptors
H_Dz(m)	Harary-like index from Barysz matrix weighted by mass	2D matrix-based descriptors
Chi_Dz(m)	Randic-like index from Barysz matrix weighted by mass	2D matrix-based descriptors
ChiA_Dz(m)	average Randic-like index from Barysz matrix weighted by mass	2D matrix-based descriptors
J_Dz(m)	Balaban-like index from Barysz matrix weighted by mass	2D matrix-based descriptors
HyWi_Dz(m)	hyper-Wiener-like index (log function) from Barysz matrix weighted by mass	2D matrix-based descriptors
SpAbs_Dz(m)	graph energy from Barysz matrix weighted by mass	2D matrix-based descriptors
SpPos_Dz(m)	spectral positive sum from Barysz matrix weighted by mass	2D matrix-based descriptors
SpPosA_Dz(m)	normalized spectral positive sum from Barysz matrix weighted by mass	2D matrix-based descriptors
SpPosLog_Dz(m)	logarithmic spectral positive sum from Barysz matrix weighted by mass	2D matrix-based descriptors
SpMax_Dz(m)	leading eigenvalue from Barysz matrix weighted by mass	2D matrix-based descriptors
SpMaxA_Dz(m)	normalized leading eigenvalue from Barysz matrix weighted by mass	2D matrix-based descriptors
SpDiam_Dz(m)	spectral diameter from Barysz matrix weighted by mass	2D matrix-based descriptors
SpAD_Dz(m)	spectral absolute deviation from Barysz matrix weighted by mass	2D matrix-based descriptors
SpMAD_Dz(m)	spectral mean absolute deviation from Barysz matrix weighted by mass	2D matrix-based descriptors
Ho_Dz(m)	Hosoya-like index (log function) from Barysz matrix weighted by mass	2D matrix-based descriptors
EE_Dz(m)	Estrada-like index (log function) from Barysz matrix weighted by mass	2D matrix-based descriptors
SM1_Dz(m)	spectral moment of order 1 from Barysz matrix weighted by mass	2D matrix-based descriptors
SM2_Dz(m)	spectral moment of order 2 from Barysz matrix weighted by mass	2D matrix-based descriptors
SM3_Dz(m)	spectral moment of order 3 from Barysz matrix weighted by mass	2D matrix-based descriptors
SM4_Dz(m)	spectral moment of order 4 from Barysz matrix weighted by mass	2D matrix-based descriptors
SM5_Dz(m)	spectral moment of order 5 from Barysz matrix weighted by mass	2D matrix-based descriptors
SM6_Dz(m)	spectral moment of order 6 from Barysz matrix weighted by mass	2D matrix-based descriptors
VE1_Dz(m)	coefficient sum of the last eigenvector (absolute values) from Barysz matrix weighted by mass	2D matrix-based descriptors
VE2_Dz(m)	average coefficient of the last eigenvector (absolute values) from Barysz matrix weighted by mass	2D matrix-based descriptors
VE3_Dz(m)	logarithmic coefficient sum of the last eigenvector (absolute values) from Barysz matrix weighted by mass	2D matrix-based descriptors
VE1sign_Dz(m)	coefficient sum of the last eigenvector from Barysz matrix weighted by mass	2D matrix-based descriptors
VE2sign_Dz(m)	average coefficient of the last eigenvector from Barysz matrix weighted by mass	2D matrix-based descriptors
VE3sign_Dz(m)	logarithmic coefficient sum of the last eigenvector from Barysz matrix weighted by mass	2D matrix-based descriptors
VR1_Dz(m)	Randic-like eigenvector-based index from Barysz matrix weighted by mass	2D matrix-based descriptors
VR2_Dz(m)	normalized Randic-like eigenvector-based index from Barysz matrix weighted by mass	2D matrix-based descriptors
VR3_Dz(m)	logarithmic Randic-like eigenvector-based index from Barysz matrix weighted by mass	2D matrix-based descriptors
Wi_Dz(v)	Wiener-like index from Barysz matrix weighted by van der Waals volume	2D matrix-based descriptors
WiA_Dz(v)	average Wiener-like index from Barysz matrix weighted by van der Waals volume	2D matrix-based descriptors
AVS_Dz(v)	average vertex sum from Barysz matrix weighted by van der Waals volume	2D matrix-based descriptors
H_Dz(v)	Harary-like index from Barysz matrix weighted by van der Waals volume	2D matrix-based descriptors
Chi_Dz(v)	Randic-like index from Barysz matrix weighted by van der Waals volume	2D matrix-based descriptors
ChiA_Dz(v)	average Randic-like index from Barysz matrix weighted by van der Waals volume	2D matrix-based descriptors
J_Dz(v)	Balaban-like index from Barysz matrix weighted by van der Waals volume	2D matrix-based descriptors
HyWi_Dz(v)	hyper-Wiener-like index (log function) from Barysz matrix weighted by van der Waals volume	2D matrix-based descriptors
SpAbs_Dz(v)	graph energy from Barysz matrix weighted by van der Waals volume	2D matrix-based descriptors
SpPos_Dz(v)	spectral positive sum from Barysz matrix weighted by van der Waals volume	2D matrix-based descriptors
SpPosA_Dz(v)	normalized spectral positive sum from Barysz matrix weighted by van der Waals volume	2D matrix-based descriptors
SpPosLog_Dz(v)	logarithmic spectral positive sum from Barysz matrix weighted by van der Waals volume	2D matrix-based descriptors
SpMax_Dz(v)	leading eigenvalue from Barysz matrix weighted by van der Waals volume	2D matrix-based descriptors
SpMaxA_Dz(v)	normalized leading eigenvalue from Barysz matrix weighted by van der Waals volume	2D matrix-based descriptors
SpDiam_Dz(v)	spectral diameter from Barysz matrix weighted by van der Waals volume	2D matrix-based descriptors
SpAD_Dz(v)	spectral absolute deviation from Barysz matrix weighted by van der Waals volume	2D matrix-based descriptors
SpMAD_Dz(v)	spectral mean absolute deviation from Barysz matrix weighted by van der Waals volume	2D matrix-based descriptors
Ho_Dz(v)	Hosoya-like index (log function) from Barysz matrix weighted by van der Waals volume	2D matrix-based descriptors
EE_Dz(v)	Estrada-like index (log function) from Barysz matrix weighted by van der Waals volume	2D matrix-based descriptors
SM1_Dz(v)	spectral moment of order 1 from Barysz matrix weighted by van der Waals volume	2D matrix-based descriptors
SM2_Dz(v)	spectral moment of order 2 from Barysz matrix weighted by van der Waals volume	2D matrix-based descriptors
SM3_Dz(v)	spectral moment of order 3 from Barysz matrix weighted by van der Waals volume	2D matrix-based descriptors
SM4_Dz(v)	spectral moment of order 4 from Barysz matrix weighted by van der Waals volume	2D matrix-based descriptors
SM5_Dz(v)	spectral moment of order 5 from Barysz matrix weighted by van der Waals volume	2D matrix-based descriptors
SM6_Dz(v)	spectral moment of order 6 from Barysz matrix weighted by van der Waals volume	2D matrix-based descriptors
VE1_Dz(v)	coefficient sum of the last eigenvector (absolute values) from Barysz matrix weighted by van der Waals volume	2D matrix-based descriptors
VE2_Dz(v)	average coefficient of the last eigenvector (absolute values) from Barysz matrix weighted by van der Waals volume	2D matrix-based descriptors
VE3_Dz(v)	logarithmic coefficient sum of the last eigenvector (absolute values) from Barysz matrix weighted by van der Waals volume	2D matrix-based descriptors
VE1sign_Dz(v)	coefficient sum of the last eigenvector from Barysz matrix weighted by van der Waals volume	2D matrix-based descriptors
VE2sign_Dz(v)	average coefficient of the last eigenvector from Barysz matrix weighted by van der Waals volume	2D matrix-based descriptors
VE3sign_Dz(v)	logarithmic coefficient sum of the last eigenvector from Barysz matrix weighted by van der Waals volume	2D matrix-based descriptors
VR1_Dz(v)	Randic-like eigenvector-based index from Barysz matrix weighted by van der Waals volume	2D matrix-based descriptors
VR2_Dz(v)	normalized Randic-like eigenvector-based index from Barysz matrix weighted by van der Waals volume	2D matrix-based descriptors
VR3_Dz(v)	logarithmic Randic-like eigenvector-based index from Barysz matrix weighted by van der Waals volume	2D matrix-based descriptors
Wi_Dz(e)	Wiener-like index from Barysz matrix weighted by Sanderson electronegativity	2D matrix-based descriptors
WiA_Dz(e)	average Wiener-like index from Barysz matrix weighted by Sanderson electronegativity	2D matrix-based descriptors
AVS_Dz(e)	average vertex sum from Barysz matrix weighted by Sanderson electronegativity	2D matrix-based descriptors
H_Dz(e)	Harary-like index from Barysz matrix weighted by Sanderson electronegativity	2D matrix-based descriptors
Chi_Dz(e)	Randic-like index from Barysz matrix weighted by Sanderson electronegativity	2D matrix-based descriptors
ChiA_Dz(e)	average Randic-like index from Barysz matrix weighted by Sanderson electronegativity	2D matrix-based descriptors
J_Dz(e)	Balaban-like index from Barysz matrix weighted by Sanderson electronegativity	2D matrix-based descriptors
HyWi_Dz(e)	hyper-Wiener-like index (log function) from Barysz matrix weighted by Sanderson electronegativity	2D matrix-based descriptors
SpAbs_Dz(e)	graph energy from Barysz matrix weighted by Sanderson electronegativity	2D matrix-based descriptors
SpPos_Dz(e)	spectral positive sum from Barysz matrix weighted by Sanderson electronegativity	2D matrix-based descriptors
SpPosA_Dz(e)	normalized spectral positive sum from Barysz matrix weighted by Sanderson electronegativity	2D matrix-based descriptors
SpPosLog_Dz(e)	logarithmic spectral positive sum from Barysz matrix weighted by Sanderson electronegativity	2D matrix-based descriptors
SpMax_Dz(e)	leading eigenvalue from Barysz matrix weighted by Sanderson electronegativity	2D matrix-based descriptors
SpMaxA_Dz(e)	normalized leading eigenvalue from Barysz matrix weighted by Sanderson electronegativity	2D matrix-based descriptors
SpDiam_Dz(e)	spectral diameter from Barysz matrix weighted by Sanderson electronegativity	2D matrix-based descriptors
SpAD_Dz(e)	spectral absolute deviation from Barysz matrix weighted by Sanderson electronegativity	2D matrix-based descriptors
SpMAD_Dz(e)	spectral mean absolute deviation from Barysz matrix weighted by Sanderson electronegativity	2D matrix-based descriptors
Ho_Dz(e)	Hosoya-like index (log function) from Barysz matrix weighted by Sanderson electronegativity	2D matrix-based descriptors
EE_Dz(e)	Estrada-like index (log function) from Barysz matrix weighted by Sanderson electronegativity	2D matrix-based descriptors
SM1_Dz(e)	spectral moment of order 1 from Barysz matrix weighted by Sanderson electronegativity	2D matrix-based descriptors
SM2_Dz(e)	spectral moment of order 2 from Barysz matrix weighted by Sanderson electronegativity	2D matrix-based descriptors
SM3_Dz(e)	spectral moment of order 3 from Barysz matrix weighted by Sanderson electronegativity	2D matrix-based descriptors
SM4_Dz(e)	spectral moment of order 4 from Barysz matrix weighted by Sanderson electronegativity	2D matrix-based descriptors
SM5_Dz(e)	spectral moment of order 5 from Barysz matrix weighted by Sanderson electronegativity	2D matrix-based descriptors
SM6_Dz(e)	spectral moment of order 6 from Barysz matrix weighted by Sanderson electronegativity	2D matrix-based descriptors
VE1_Dz(e)	coefficient sum of the last eigenvector (absolute values) from Barysz matrix weighted by Sanderson electronegativity	2D matrix-based descriptors
VE2_Dz(e)	average coefficient of the last eigenvector (absolute values) from Barysz matrix weighted by Sanderson electronegativity	2D matrix-based descriptors
VE3_Dz(e)	logarithmic coefficient sum of the last eigenvector (absolute values) from Barysz matrix weighted by Sanderson electronegativity	2D matrix-based descriptors
VE1sign_Dz(e)	coefficient sum of the last eigenvector from Barysz matrix weighted by Sanderson electronegativity	2D matrix-based descriptors
VE2sign_Dz(e)	average coefficient of the last eigenvector from Barysz matrix weighted by Sanderson electronegativity	2D matrix-based descriptors
VE3sign_Dz(e)	logarithmic coefficient sum of the last eigenvector from Barysz matrix weighted by Sanderson electronegativity	2D matrix-based descriptors
VR1_Dz(e)	Randic-like eigenvector-based index from Barysz matrix weighted by Sanderson electronegativity	2D matrix-based descriptors
VR2_Dz(e)	normalized Randic-like eigenvector-based index from Barysz matrix weighted by Sanderson electronegativity	2D matrix-based descriptors
VR3_Dz(e)	logarithmic Randic-like eigenvector-based index from Barysz matrix weighted by Sanderson electronegativity	2D matrix-based descriptors
Wi_Dz(p)	Wiener-like index from Barysz matrix weighted by polarizability	2D matrix-based descriptors
WiA_Dz(p)	average Wiener-like index from Barysz matrix weighted by polarizability	2D matrix-based descriptors
AVS_Dz(p)	average vertex sum from Barysz matrix weighted by polarizability	2D matrix-based descriptors
H_Dz(p)	Harary-like index from Barysz matrix weighted by polarizability	2D matrix-based descriptors
Chi_Dz(p)	Randic-like index from Barysz matrix weighted by polarizability	2D matrix-based descriptors
ChiA_Dz(p)	average Randic-like index from Barysz matrix weighted by polarizability	2D matrix-based descriptors
J_Dz(p)	Balaban-like index from Barysz matrix weighted by polarizability	2D matrix-based descriptors
HyWi_Dz(p)	hyper-Wiener-like index (log function) from Barysz matrix weighted by polarizability	2D matrix-based descriptors
SpAbs_Dz(p)	graph energy from Barysz matrix weighted by polarizability	2D matrix-based descriptors
SpPos_Dz(p)	spectral positive sum from Barysz matrix weighted by polarizability	2D matrix-based descriptors
SpPosA_Dz(p)	normalized spectral positive sum from Barysz matrix weighted by polarizability	2D matrix-based descriptors
SpPosLog_Dz(p)	logarithmic spectral positive sum from Barysz matrix weighted by polarizability	2D matrix-based descriptors
SpMax_Dz(p)	leading eigenvalue from Barysz matrix weighted by polarizability	2D matrix-based descriptors
SpMaxA_Dz(p)	normalized leading eigenvalue from Barysz matrix weighted by polarizability	2D matrix-based descriptors
SpDiam_Dz(p)	spectral diameter from Barysz matrix weighted by polarizability	2D matrix-based descriptors
SpAD_Dz(p)	spectral absolute deviation from Barysz matrix weighted by polarizability	2D matrix-based descriptors
SpMAD_Dz(p)	spectral mean absolute deviation from Barysz matrix weighted by polarizability	2D matrix-based descriptors
Ho_Dz(p)	Hosoya-like index (log function) from Barysz matrix weighted by polarizability	2D matrix-based descriptors
EE_Dz(p)	Estrada-like index (log function) from Barysz matrix weighted by polarizability	2D matrix-based descriptors
SM1_Dz(p)	spectral moment of order 1 from Barysz matrix weighted by polarizability	2D matrix-based descriptors
SM2_Dz(p)	spectral moment of order 2 from Barysz matrix weighted by polarizability	2D matrix-based descriptors
SM3_Dz(p)	spectral moment of order 3 from Barysz matrix weighted by polarizability	2D matrix-based descriptors
SM4_Dz(p)	spectral moment of order 4 from Barysz matrix weighted by polarizability	2D matrix-based descriptors
SM5_Dz(p)	spectral moment of order 5 from Barysz matrix weighted by polarizability	2D matrix-based descriptors
SM6_Dz(p)	spectral moment of order 6 from Barysz matrix weighted by polarizability	2D matrix-based descriptors
VE1_Dz(p)	coefficient sum of the last eigenvector (absolute values) from Barysz matrix weighted by polarizability	2D matrix-based descriptors
VE2_Dz(p)	average coefficient of the last eigenvector (absolute values) from Barysz matrix weighted by polarizability	2D matrix-based descriptors
VE3_Dz(p)	logarithmic coefficient sum of the last eigenvector (absolute values) from Barysz matrix weighted by polarizability	2D matrix-based descriptors
VE1sign_Dz(p)	coefficient sum of the last eigenvector from Barysz matrix weighted by polarizability	2D matrix-based descriptors
VE2sign_Dz(p)	average coefficient of the last eigenvector from Barysz matrix weighted by polarizability	2D matrix-based descriptors
VE3sign_Dz(p)	logarithmic coefficient sum of the last eigenvector from Barysz matrix weighted by polarizability	2D matrix-based descriptors
VR1_Dz(p)	Randic-like eigenvector-based index from Barysz matrix weighted by polarizability	2D matrix-based descriptors
VR2_Dz(p)	normalized Randic-like eigenvector-based index from Barysz matrix weighted by polarizability	2D matrix-based descriptors
VR3_Dz(p)	logarithmic Randic-like eigenvector-based index from Barysz matrix weighted by polarizability	2D matrix-based descriptors
Wi_Dz(i)	Wiener-like index from Barysz matrix weighted by ionization potential	2D matrix-based descriptors
WiA_Dz(i)	average Wiener-like index from Barysz matrix weighted by ionization potential	2D matrix-based descriptors
AVS_Dz(i)	average vertex sum from Barysz matrix weighted by ionization potential	2D matrix-based descriptors
H_Dz(i)	Harary-like index from Barysz matrix weighted by ionization potential	2D matrix-based descriptors
Chi_Dz(i)	Randic-like index from Barysz matrix weighted by ionization potential	2D matrix-based descriptors
ChiA_Dz(i)	average Randic-like index from Barysz matrix weighted by ionization potential	2D matrix-based descriptors
J_Dz(i)	Balaban-like index from Barysz matrix weighted by ionization potential	2D matrix-based descriptors
HyWi_Dz(i)	hyper-Wiener-like index (log function) from Barysz matrix weighted by ionization potential	2D matrix-based descriptors
SpAbs_Dz(i)	graph energy from Barysz matrix weighted by ionization potential	2D matrix-based descriptors
SpPos_Dz(i)	spectral positive sum from Barysz matrix weighted by ionization potential	2D matrix-based descriptors
SpPosA_Dz(i)	normalized spectral positive sum from Barysz matrix weighted by ionization potential	2D matrix-based descriptors
SpPosLog_Dz(i)	logarithmic spectral positive sum from Barysz matrix weighted by ionization potential	2D matrix-based descriptors
SpMax_Dz(i)	leading eigenvalue from Barysz matrix weighted by ionization potential	2D matrix-based descriptors
SpMaxA_Dz(i)	normalized leading eigenvalue from Barysz matrix weighted by ionization potential	2D matrix-based descriptors
SpDiam_Dz(i)	spectral diameter from Barysz matrix weighted by ionization potential	2D matrix-based descriptors
SpAD_Dz(i)	spectral absolute deviation from Barysz matrix weighted by ionization potential	2D matrix-based descriptors
SpMAD_Dz(i)	spectral mean absolute deviation from Barysz matrix weighted by ionization potential	2D matrix-based descriptors
Ho_Dz(i)	Hosoya-like index (log function) from Barysz matrix weighted by ionization potential	2D matrix-based descriptors
EE_Dz(i)	Estrada-like index (log function) from Barysz matrix weighted by ionization potential	2D matrix-based descriptors
SM1_Dz(i)	spectral moment of order 1 from Barysz matrix weighted by ionization potential	2D matrix-based descriptors
SM2_Dz(i)	spectral moment of order 2 from Barysz matrix weighted by ionization potential	2D matrix-based descriptors
SM3_Dz(i)	spectral moment of order 3 from Barysz matrix weighted by ionization potential	2D matrix-based descriptors
SM4_Dz(i)	spectral moment of order 4 from Barysz matrix weighted by ionization potential	2D matrix-based descriptors
SM5_Dz(i)	spectral moment of order 5 from Barysz matrix weighted by ionization potential	2D matrix-based descriptors
SM6_Dz(i)	spectral moment of order 6 from Barysz matrix weighted by ionization potential	2D matrix-based descriptors
VE1_Dz(i)	coefficient sum of the last eigenvector (absolute values) from Barysz matrix weighted by ionization potential	2D matrix-based descriptors
VE2_Dz(i)	average coefficient of the last eigenvector (absolute values) from Barysz matrix weighted by ionization potential	2D matrix-based descriptors
VE3_Dz(i)	logarithmic coefficient sum of the last eigenvector (absolute values) from Barysz matrix weighted by ionization potential	2D matrix-based descriptors
VE1sign_Dz(i)	coefficient sum of the last eigenvector from Barysz matrix weighted by ionization potential	2D matrix-based descriptors
VE2sign_Dz(i)	average coefficient of the last eigenvector from Barysz matrix weighted by ionization potential	2D matrix-based descriptors
VE3sign_Dz(i)	logarithmic coefficient sum of the last eigenvector from Barysz matrix weighted by ionization potential	2D matrix-based descriptors
VR1_Dz(i)	Randic-like eigenvector-based index from Barysz matrix weighted by ionization potential	2D matrix-based descriptors
VR2_Dz(i)	normalized Randic-like eigenvector-based index from Barysz matrix weighted by ionization potential	2D matrix-based descriptors
VR3_Dz(i)	logarithmic Randic-like eigenvector-based index from Barysz matrix weighted by ionization potential	2D matrix-based descriptors
Wi_B(m)	Wiener-like index from Burden matrix weighted by mass	2D matrix-based descriptors
WiA_B(m)	average Wiener-like index from Burden matrix weighted by mass	2D matrix-based descriptors
AVS_B(m)	average vertex sum from Burden matrix weighted by mass	2D matrix-based descriptors
Chi_B(m)	Randic-like index from Burden matrix weighted by mass	2D matrix-based descriptors
ChiA_B(m)	average Randic-like index from Burden matrix weighted by mass	2D matrix-based descriptors
J_B(m)	Balaban-like index from Burden matrix weighted by mass	2D matrix-based descriptors
HyWi_B(m)	hyper-Wiener-like index (log function) from Burden matrix weighted by mass	2D matrix-based descriptors
SpAbs_B(m)	graph energy from Burden matrix weighted by mass	2D matrix-based descriptors
SpPos_B(m)	spectral positive sum from Burden matrix weighted by mass	2D matrix-based descriptors
SpPosA_B(m)	normalized spectral positive sum from Burden matrix weighted by mass	2D matrix-based descriptors
SpPosLog_B(m)	logarithmic spectral positive sum from Burden matrix weighted by mass	2D matrix-based descriptors
SpMax_B(m)	leading eigenvalue from Burden matrix weighted by mass	2D matrix-based descriptors
SpMaxA_B(m)	normalized leading eigenvalue from Burden matrix weighted by mass	2D matrix-based descriptors
SpDiam_B(m)	spectral diameter from Burden matrix weighted by mass	2D matrix-based descriptors
SpAD_B(m)	spectral absolute deviation from Burden matrix weighted by mass	2D matrix-based descriptors
SpMAD_B(m)	spectral mean absolute deviation from Burden matrix weighted by mass	2D matrix-based descriptors
Ho_B(m)	Hosoya-like index (log function) from Burden matrix weighted by mass	2D matrix-based descriptors
EE_B(m)	Estrada-like index (log function) from Burden matrix weighted by mass	2D matrix-based descriptors
SM1_B(m)	spectral moment of order 1 from Burden matrix weighted by mass	2D matrix-based descriptors
SM2_B(m)	spectral moment of order 2 from Burden matrix weighted by mass	2D matrix-based descriptors
SM3_B(m)	spectral moment of order 3 from Burden matrix weighted by mass	2D matrix-based descriptors
SM4_B(m)	spectral moment of order 4 from Burden matrix weighted by mass	2D matrix-based descriptors
SM5_B(m)	spectral moment of order 5 from Burden matrix weighted by mass	2D matrix-based descriptors
SM6_B(m)	spectral moment of order 6 from Burden matrix weighted by mass	2D matrix-based descriptors
VE1_B(m)	coefficient sum of the last eigenvector (absolute values) from Burden matrix weighted by mass	2D matrix-based descriptors
VE2_B(m)	average coefficient of the last eigenvector (absolute values) from Burden matrix weighted by mass	2D matrix-based descriptors
VE3_B(m)	logarithmic coefficient sum of the last eigenvector (absolute values) from Burden matrix weighted by mass	2D matrix-based descriptors
VE1sign_B(m)	coefficient sum of the last eigenvector from Burden matrix weighted by mass	2D matrix-based descriptors
VE2sign_B(m)	average coefficient of the last eigenvector from Burden matrix weighted by mass	2D matrix-based descriptors
VE3sign_B(m)	logarithmic coefficient sum of the last eigenvector from Burden matrix weighted by mass	2D matrix-based descriptors
VR1_B(m)	Randic-like eigenvector-based index from Burden matrix weighted by mass	2D matrix-based descriptors
VR2_B(m)	normalized Randic-like eigenvector-based index from Burden matrix weighted by mass	2D matrix-based descriptors
VR3_B(m)	logarithmic Randic-like eigenvector-based index from Burden matrix weighted by mass	2D matrix-based descriptors
Wi_B(v)	Wiener-like index from Burden matrix weighted by van der Waals volume	2D matrix-based descriptors
WiA_B(v)	average Wiener-like index from Burden matrix weighted by van der Waals volume	2D matrix-based descriptors
AVS_B(v)	average vertex sum from Burden matrix weighted by van der Waals volume	2D matrix-based descriptors
Chi_B(v)	Randic-like index from Burden matrix weighted by van der Waals volume	2D matrix-based descriptors
ChiA_B(v)	average Randic-like index from Burden matrix weighted by van der Waals volume	2D matrix-based descriptors
J_B(v)	Balaban-like index from Burden matrix weighted by van der Waals volume	2D matrix-based descriptors
HyWi_B(v)	hyper-Wiener-like index (log function) from Burden matrix weighted by van der Waals volume	2D matrix-based descriptors
SpAbs_B(v)	graph energy from Burden matrix weighted by van der Waals volume	2D matrix-based descriptors
SpPos_B(v)	spectral positive sum from Burden matrix weighted by van der Waals volume	2D matrix-based descriptors
SpPosA_B(v)	normalized spectral positive sum from Burden matrix weighted by van der Waals volume	2D matrix-based descriptors
SpPosLog_B(v)	logarithmic spectral positive sum from Burden matrix weighted by van der Waals volume	2D matrix-based descriptors
SpMax_B(v)	leading eigenvalue from Burden matrix weighted by van der Waals volume	2D matrix-based descriptors
SpMaxA_B(v)	normalized leading eigenvalue from Burden matrix weighted by van der Waals volume	2D matrix-based descriptors
SpDiam_B(v)	spectral diameter from Burden matrix weighted by van der Waals volume	2D matrix-based descriptors
SpAD_B(v)	spectral absolute deviation from Burden matrix weighted by van der Waals volume	2D matrix-based descriptors
SpMAD_B(v)	spectral mean absolute deviation from Burden matrix weighted by van der Waals volume	2D matrix-based descriptors
Ho_B(v)	Hosoya-like index (log function) from Burden matrix weighted by van der Waals volume	2D matrix-based descriptors
EE_B(v)	Estrada-like index (log function) from Burden matrix weighted by van der Waals volume	2D matrix-based descriptors
SM1_B(v)	spectral moment of order 1 from Burden matrix weighted by van der Waals volume	2D matrix-based descriptors
SM2_B(v)	spectral moment of order 2 from Burden matrix weighted by van der Waals volume	2D matrix-based descriptors
SM3_B(v)	spectral moment of order 3 from Burden matrix weighted by van der Waals volume	2D matrix-based descriptors
SM4_B(v)	spectral moment of order 4 from Burden matrix weighted by van der Waals volume	2D matrix-based descriptors
SM5_B(v)	spectral moment of order 5 from Burden matrix weighted by van der Waals volume	2D matrix-based descriptors
SM6_B(v)	spectral moment of order 6 from Burden matrix weighted by van der Waals volume	2D matrix-based descriptors
VE1_B(v)	coefficient sum of the last eigenvector (absolute values) from Burden matrix weighted by van der Waals volume	2D matrix-based descriptors
VE2_B(v)	average coefficient of the last eigenvector (absolute values) from Burden matrix weighted by van der Waals volume	2D matrix-based descriptors
VE3_B(v)	logarithmic coefficient sum of the last eigenvector (absolute values) from Burden matrix weighted by van der Waals volume	2D matrix-based descriptors
VE1sign_B(v)	coefficient sum of the last eigenvector from Burden matrix weighted by van der Waals volume	2D matrix-based descriptors
VE2sign_B(v)	average coefficient of the last eigenvector from Burden matrix weighted by van der Waals volume	2D matrix-based descriptors
VE3sign_B(v)	logarithmic coefficient sum of the last eigenvector from Burden matrix weighted by van der Waals volume	2D matrix-based descriptors
VR1_B(v)	Randic-like eigenvector-based index from Burden matrix weighted by van der Waals volume	2D matrix-based descriptors
VR2_B(v)	normalized Randic-like eigenvector-based index from Burden matrix weighted by van der Waals volume	2D matrix-based descriptors
VR3_B(v)	logarithmic Randic-like eigenvector-based index from Burden matrix weighted by van der Waals volume	2D matrix-based descriptors
Wi_B(e)	Wiener-like index from Burden matrix weighted by Sanderson electronegativity	2D matrix-based descriptors
WiA_B(e)	average Wiener-like index from Burden matrix weighted by Sanderson electronegativity	2D matrix-based descriptors
AVS_B(e)	average vertex sum from Burden matrix weighted by Sanderson electronegativity	2D matrix-based descriptors
Chi_B(e)	Randic-like index from Burden matrix weighted by Sanderson electronegativity	2D matrix-based descriptors
ChiA_B(e)	average Randic-like index from Burden matrix weighted by Sanderson electronegativity	2D matrix-based descriptors
J_B(e)	Balaban-like index from Burden matrix weighted by Sanderson electronegativity	2D matrix-based descriptors
HyWi_B(e)	hyper-Wiener-like index (log function) from Burden matrix weighted by Sanderson electronegativity	2D matrix-based descriptors
SpAbs_B(e)	graph energy from Burden matrix weighted by Sanderson electronegativity	2D matrix-based descriptors
SpPos_B(e)	spectral positive sum from Burden matrix weighted by Sanderson electronegativity	2D matrix-based descriptors
SpPosA_B(e)	normalized spectral positive sum from Burden matrix weighted by Sanderson electronegativity	2D matrix-based descriptors
SpPosLog_B(e)	logarithmic spectral positive sum from Burden matrix weighted by Sanderson electronegativity	2D matrix-based descriptors
SpMax_B(e)	leading eigenvalue from Burden matrix weighted by Sanderson electronegativity	2D matrix-based descriptors
SpMaxA_B(e)	normalized leading eigenvalue from Burden matrix weighted by Sanderson electronegativity	2D matrix-based descriptors
SpDiam_B(e)	spectral diameter from Burden matrix weighted by Sanderson electronegativity	2D matrix-based descriptors
SpAD_B(e)	spectral absolute deviation from Burden matrix weighted by Sanderson electronegativity	2D matrix-based descriptors
SpMAD_B(e)	spectral mean absolute deviation from Burden matrix weighted by Sanderson electronegativity	2D matrix-based descriptors
Ho_B(e)	Hosoya-like index (log function) from Burden matrix weighted by Sanderson electronegativity	2D matrix-based descriptors
EE_B(e)	Estrada-like index (log function) from Burden matrix weighted by Sanderson electronegativity	2D matrix-based descriptors
SM1_B(e)	spectral moment of order 1 from Burden matrix weighted by Sanderson electronegativity	2D matrix-based descriptors
SM2_B(e)	spectral moment of order 2 from Burden matrix weighted by Sanderson electronegativity	2D matrix-based descriptors
SM3_B(e)	spectral moment of order 3 from Burden matrix weighted by Sanderson electronegativity	2D matrix-based descriptors
SM4_B(e)	spectral moment of order 4 from Burden matrix weighted by Sanderson electronegativity	2D matrix-based descriptors
SM5_B(e)	spectral moment of order 5 from Burden matrix weighted by Sanderson electronegativity	2D matrix-based descriptors
SM6_B(e)	spectral moment of order 6 from Burden matrix weighted by Sanderson electronegativity	2D matrix-based descriptors
VE1_B(e)	coefficient sum of the last eigenvector (absolute values) from Burden matrix weighted by Sanderson electronegativity	2D matrix-based descriptors
VE2_B(e)	average coefficient of the last eigenvector (absolute values) from Burden matrix weighted by Sanderson electronegativity	2D matrix-based descriptors
VE3_B(e)	logarithmic coefficient sum of the last eigenvector (absolute values) from Burden matrix weighted by Sanderson electronegativity	2D matrix-based descriptors
VE1sign_B(e)	coefficient sum of the last eigenvector from Burden matrix weighted by Sanderson electronegativity	2D matrix-based descriptors
VE2sign_B(e)	average coefficient of the last eigenvector from Burden matrix weighted by Sanderson electronegativity	2D matrix-based descriptors
VE3sign_B(e)	logarithmic coefficient sum of the last eigenvector from Burden matrix weighted by Sanderson electronegativity	2D matrix-based descriptors
VR1_B(e)	Randic-like eigenvector-based index from Burden matrix weighted by Sanderson electronegativity	2D matrix-based descriptors
VR2_B(e)	normalized Randic-like eigenvector-based index from Burden matrix weighted by Sanderson electronegativity	2D matrix-based descriptors
VR3_B(e)	logarithmic Randic-like eigenvector-based index from Burden matrix weighted by Sanderson electronegativity	2D matrix-based descriptors
Wi_B(p)	Wiener-like index from Burden matrix weighted by polarizability	2D matrix-based descriptors
WiA_B(p)	average Wiener-like index from Burden matrix weighted by polarizability	2D matrix-based descriptors
AVS_B(p)	average vertex sum from Burden matrix weighted by polarizability	2D matrix-based descriptors
Chi_B(p)	Randic-like index from Burden matrix weighted by polarizability	2D matrix-based descriptors
ChiA_B(p)	average Randic-like index from Burden matrix weighted by polarizability	2D matrix-based descriptors
J_B(p)	Balaban-like index from Burden matrix weighted by polarizability	2D matrix-based descriptors
HyWi_B(p)	hyper-Wiener-like index (log function) from Burden matrix weighted by polarizability	2D matrix-based descriptors
SpAbs_B(p)	graph energy from Burden matrix weighted by polarizability	2D matrix-based descriptors
SpPos_B(p)	spectral positive sum from Burden matrix weighted by polarizability	2D matrix-based descriptors
SpPosA_B(p)	normalized spectral positive sum from Burden matrix weighted by polarizability	2D matrix-based descriptors
SpPosLog_B(p)	logarithmic spectral positive sum from Burden matrix weighted by polarizability	2D matrix-based descriptors
SpMax_B(p)	leading eigenvalue from Burden matrix weighted by polarizability	2D matrix-based descriptors
SpMaxA_B(p)	normalized leading eigenvalue from Burden matrix weighted by polarizability	2D matrix-based descriptors
SpDiam_B(p)	spectral diameter from Burden matrix weighted by polarizability	2D matrix-based descriptors
SpAD_B(p)	spectral absolute deviation from Burden matrix weighted by polarizability	2D matrix-based descriptors
SpMAD_B(p)	spectral mean absolute deviation from Burden matrix weighted by polarizability	2D matrix-based descriptors
Ho_B(p)	Hosoya-like index (log function) from Burden matrix weighted by polarizability	2D matrix-based descriptors
EE_B(p)	Estrada-like index (log function) from Burden matrix weighted by polarizability	2D matrix-based descriptors
SM1_B(p)	spectral moment of order 1 from Burden matrix weighted by polarizability	2D matrix-based descriptors
SM2_B(p)	spectral moment of order 2 from Burden matrix weighted by polarizability	2D matrix-based descriptors
SM3_B(p)	spectral moment of order 3 from Burden matrix weighted by polarizability	2D matrix-based descriptors
SM4_B(p)	spectral moment of order 4 from Burden matrix weighted by polarizability	2D matrix-based descriptors
SM5_B(p)	spectral moment of order 5 from Burden matrix weighted by polarizability	2D matrix-based descriptors
SM6_B(p)	spectral moment of order 6 from Burden matrix weighted by polarizability	2D matrix-based descriptors
VE1_B(p)	coefficient sum of the last eigenvector (absolute values) from Burden matrix weighted by polarizability	2D matrix-based descriptors
VE2_B(p)	average coefficient of the last eigenvector (absolute values) from Burden matrix weighted by polarizability	2D matrix-based descriptors
VE3_B(p)	logarithmic coefficient sum of the last eigenvector (absolute values) from Burden matrix weighted by polarizability	2D matrix-based descriptors
VE1sign_B(p)	coefficient sum of the last eigenvector from Burden matrix weighted by polarizability	2D matrix-based descriptors
VE2sign_B(p)	average coefficient of the last eigenvector from Burden matrix weighted by polarizability	2D matrix-based descriptors
VE3sign_B(p)	logarithmic coefficient sum of the last eigenvector from Burden matrix weighted by polarizability	2D matrix-based descriptors
VR1_B(p)	Randic-like eigenvector-based index from Burden matrix weighted by polarizability	2D matrix-based descriptors
VR2_B(p)	normalized Randic-like eigenvector-based index from Burden matrix weighted by polarizability	2D matrix-based descriptors
VR3_B(p)	logarithmic Randic-like eigenvector-based index from Burden matrix weighted by polarizability	2D matrix-based descriptors
Wi_B(i)	Wiener-like index from Burden matrix weighted by ionization potential	2D matrix-based descriptors
WiA_B(i)	average Wiener-like index from Burden matrix weighted by ionization potential	2D matrix-based descriptors
AVS_B(i)	average vertex sum from Burden matrix weighted by ionization potential	2D matrix-based descriptors
Chi_B(i)	Randic-like index from Burden matrix weighted by ionization potential	2D matrix-based descriptors
ChiA_B(i)	average Randic-like index from Burden matrix weighted by ionization potential	2D matrix-based descriptors
J_B(i)	Balaban-like index from Burden matrix weighted by ionization potential	2D matrix-based descriptors
HyWi_B(i)	hyper-Wiener-like index (log function) from Burden matrix weighted by ionization potential	2D matrix-based descriptors
SpAbs_B(i)	graph energy from Burden matrix weighted by ionization potential	2D matrix-based descriptors
SpPos_B(i)	spectral positive sum from Burden matrix weighted by ionization potential	2D matrix-based descriptors
SpPosA_B(i)	normalized spectral positive sum from Burden matrix weighted by ionization potential	2D matrix-based descriptors
SpPosLog_B(i)	logarithmic spectral positive sum from Burden matrix weighted by ionization potential	2D matrix-based descriptors
SpMax_B(i)	leading eigenvalue from Burden matrix weighted by ionization potential	2D matrix-based descriptors
SpMaxA_B(i)	normalized leading eigenvalue from Burden matrix weighted by ionization potential	2D matrix-based descriptors
SpDiam_B(i)	spectral diameter from Burden matrix weighted by ionization potential	2D matrix-based descriptors
SpAD_B(i)	spectral absolute deviation from Burden matrix weighted by ionization potential	2D matrix-based descriptors
SpMAD_B(i)	spectral mean absolute deviation from Burden matrix weighted by ionization potential	2D matrix-based descriptors
Ho_B(i)	Hosoya-like index (log function) from Burden matrix weighted by ionization potential	2D matrix-based descriptors
EE_B(i)	Estrada-like index (log function) from Burden matrix weighted by ionization potential	2D matrix-based descriptors
SM1_B(i)	spectral moment of order 1 from Burden matrix weighted by ionization potential	2D matrix-based descriptors
SM2_B(i)	spectral moment of order 2 from Burden matrix weighted by ionization potential	2D matrix-based descriptors
SM3_B(i)	spectral moment of order 3 from Burden matrix weighted by ionization potential	2D matrix-based descriptors
SM4_B(i)	spectral moment of order 4 from Burden matrix weighted by ionization potential	2D matrix-based descriptors
SM5_B(i)	spectral moment of order 5 from Burden matrix weighted by ionization potential	2D matrix-based descriptors
SM6_B(i)	spectral moment of order 6 from Burden matrix weighted by ionization potential	2D matrix-based descriptors
VE1_B(i)	coefficient sum of the last eigenvector (absolute values) from Burden matrix weighted by ionization potential	2D matrix-based descriptors
VE2_B(i)	average coefficient of the last eigenvector (absolute values) from Burden matrix weighted by ionization potential	2D matrix-based descriptors
VE3_B(i)	logarithmic coefficient sum of the last eigenvector (absolute values) from Burden matrix weighted by ionization potential	2D matrix-based descriptors
VE1sign_B(i)	coefficient sum of the last eigenvector from Burden matrix weighted by ionization potential	2D matrix-based descriptors
VE2sign_B(i)	average coefficient of the last eigenvector from Burden matrix weighted by ionization potential	2D matrix-based descriptors
VE3sign_B(i)	logarithmic coefficient sum of the last eigenvector from Burden matrix weighted by ionization potential	2D matrix-based descriptors
VR1_B(i)	Randic-like eigenvector-based index from Burden matrix weighted by ionization potential	2D matrix-based descriptors
VR2_B(i)	normalized Randic-like eigenvector-based index from Burden matrix weighted by ionization potential	2D matrix-based descriptors
VR3_B(i)	logarithmic Randic-like eigenvector-based index from Burden matrix weighted by ionization potential	2D matrix-based descriptors
Wi_B(s)	Wiener-like index from Burden matrix weighted by I-State	2D matrix-based descriptors
WiA_B(s)	average Wiener-like index from Burden matrix weighted by I-State	2D matrix-based descriptors
AVS_B(s)	average vertex sum from Burden matrix weighted by I-State	2D matrix-based descriptors
Chi_B(s)	Randic-like index from Burden matrix weighted by I-State	2D matrix-based descriptors
ChiA_B(s)	average Randic-like index from Burden matrix weighted by I-State	2D matrix-based descriptors
J_B(s)	Balaban-like index from Burden matrix weighted by I-State	2D matrix-based descriptors
HyWi_B(s)	hyper-Wiener-like index (log function) from Burden matrix weighted by I-State	2D matrix-based descriptors
SpAbs_B(s)	graph energy from Burden matrix weighted by I-State	2D matrix-based descriptors
SpPos_B(s)	spectral positive sum from Burden matrix weighted by I-State	2D matrix-based descriptors
SpPosA_B(s)	normalized spectral positive sum from Burden matrix weighted by I-State	2D matrix-based descriptors
SpPosLog_B(s)	logarithmic spectral positive sum from Burden matrix weighted by I-State	2D matrix-based descriptors
SpMax_B(s)	leading eigenvalue from Burden matrix weighted by I-State	2D matrix-based descriptors
SpMaxA_B(s)	normalized leading eigenvalue from Burden matrix weighted by I-State	2D matrix-based descriptors
SpDiam_B(s)	spectral diameter from Burden matrix weighted by I-State	2D matrix-based descriptors
SpAD_B(s)	spectral absolute deviation from Burden matrix weighted by I-State	2D matrix-based descriptors
SpMAD_B(s)	spectral mean absolute deviation from Burden matrix weighted by I-State	2D matrix-based descriptors
Ho_B(s)	Hosoya-like index (log function) from Burden matrix weighted by I-State	2D matrix-based descriptors
EE_B(s)	Estrada-like index (log function) from Burden matrix weighted by I-State	2D matrix-based descriptors
SM1_B(s)	spectral moment of order 1 from Burden matrix weighted by I-State	2D matrix-based descriptors
SM2_B(s)	spectral moment of order 2 from Burden matrix weighted by I-State	2D matrix-based descriptors
SM3_B(s)	spectral moment of order 3 from Burden matrix weighted by I-State	2D matrix-based descriptors
SM4_B(s)	spectral moment of order 4 from Burden matrix weighted by I-State	2D matrix-based descriptors
SM5_B(s)	spectral moment of order 5 from Burden matrix weighted by I-State	2D matrix-based descriptors
SM6_B(s)	spectral moment of order 6 from Burden matrix weighted by I-State	2D matrix-based descriptors
VE1_B(s)	coefficient sum of the last eigenvector (absolute values) from Burden matrix weighted by I-State	2D matrix-based descriptors
VE2_B(s)	average coefficient of the last eigenvector (absolute values) from Burden matrix weighted by I-State	2D matrix-based descriptors
VE3_B(s)	logarithmic coefficient sum of the last eigenvector (absolute values) from Burden matrix weighted by I-State	2D matrix-based descriptors
VE1sign_B(s)	coefficient sum of the last eigenvector from Burden matrix weighted by I-State	2D matrix-based descriptors
VE2sign_B(s)	average coefficient of the last eigenvector from Burden matrix weighted by I-State	2D matrix-based descriptors
VE3sign_B(s)	logarithmic coefficient sum of the last eigenvector from Burden matrix weighted by I-State	2D matrix-based descriptors
VR1_B(s)	Randic-like eigenvector-based index from Burden matrix weighted by I-State	2D matrix-based descriptors
VR2_B(s)	normalized Randic-like eigenvector-based index from Burden matrix weighted by I-State	2D matrix-based descriptors
VR3_B(s)	logarithmic Randic-like eigenvector-based index from Burden matrix weighted by I-State	2D matrix-based descriptors
ATS1m	Broto-Moreau autocorrelation of lag 1 (log function) weighted by mass	2D autocorrelations
ATS2m	Broto-Moreau autocorrelation of lag 2 (log function) weighted by mass	2D autocorrelations
ATS3m	Broto-Moreau autocorrelation of lag 3 (log function) weighted by mass	2D autocorrelations
ATS4m	Broto-Moreau autocorrelation of lag 4 (log function) weighted by mass	2D autocorrelations
ATS5m	Broto-Moreau autocorrelation of lag 5 (log function) weighted by mass	2D autocorrelations
ATS6m	Broto-Moreau autocorrelation of lag 6 (log function) weighted by mass	2D autocorrelations
ATS7m	Broto-Moreau autocorrelation of lag 7 (log function) weighted by mass	2D autocorrelations
ATS8m	Broto-Moreau autocorrelation of lag 8 (log function) weighted by mass	2D autocorrelations
ATS1v	Broto-Moreau autocorrelation of lag 1 (log function) weighted by van der Waals volume	2D autocorrelations
ATS2v	Broto-Moreau autocorrelation of lag 2 (log function) weighted by van der Waals volume	2D autocorrelations
ATS3v	Broto-Moreau autocorrelation of lag 3 (log function) weighted by van der Waals volume	2D autocorrelations
ATS4v	Broto-Moreau autocorrelation of lag 4 (log function) weighted by van der Waals volume	2D autocorrelations
ATS5v	Broto-Moreau autocorrelation of lag 5 (log function) weighted by van der Waals volume	2D autocorrelations
ATS6v	Broto-Moreau autocorrelation of lag 6 (log function) weighted by van der Waals volume	2D autocorrelations
ATS7v	Broto-Moreau autocorrelation of lag 7 (log function) weighted by van der Waals volume	2D autocorrelations
ATS8v	Broto-Moreau autocorrelation of lag 8 (log function) weighted by van der Waals volume	2D autocorrelations
ATS1e	Broto-Moreau autocorrelation of lag 1 (log function) weighted by Sanderson electronegativity	2D autocorrelations
ATS2e	Broto-Moreau autocorrelation of lag 2 (log function) weighted by Sanderson electronegativity	2D autocorrelations
ATS3e	Broto-Moreau autocorrelation of lag 3 (log function) weighted by Sanderson electronegativity	2D autocorrelations
ATS4e	Broto-Moreau autocorrelation of lag 4 (log function) weighted by Sanderson electronegativity	2D autocorrelations
ATS5e	Broto-Moreau autocorrelation of lag 5 (log function) weighted by Sanderson electronegativity	2D autocorrelations
ATS6e	Broto-Moreau autocorrelation of lag 6 (log function) weighted by Sanderson electronegativity	2D autocorrelations
ATS7e	Broto-Moreau autocorrelation of lag 7 (log function) weighted by Sanderson electronegativity	2D autocorrelations
ATS8e	Broto-Moreau autocorrelation of lag 8 (log function) weighted by Sanderson electronegativity	2D autocorrelations
ATS1p	Broto-Moreau autocorrelation of lag 1 (log function) weighted by polarizability	2D autocorrelations
ATS2p	Broto-Moreau autocorrelation of lag 2 (log function) weighted by polarizability	2D autocorrelations
ATS3p	Broto-Moreau autocorrelation of lag 3 (log function) weighted by polarizability	2D autocorrelations
ATS4p	Broto-Moreau autocorrelation of lag 4 (log function) weighted by polarizability	2D autocorrelations
ATS5p	Broto-Moreau autocorrelation of lag 5 (log function) weighted by polarizability	2D autocorrelations
ATS6p	Broto-Moreau autocorrelation of lag 6 (log function) weighted by polarizability	2D autocorrelations
ATS7p	Broto-Moreau autocorrelation of lag 7 (log function) weighted by polarizability	2D autocorrelations
ATS8p	Broto-Moreau autocorrelation of lag 8 (log function) weighted by polarizability	2D autocorrelations
ATS1i	Broto-Moreau autocorrelation of lag 1 (log function) weighted by ionization potential	2D autocorrelations
ATS2i	Broto-Moreau autocorrelation of lag 2 (log function) weighted by ionization potential	2D autocorrelations
ATS3i	Broto-Moreau autocorrelation of lag 3 (log function) weighted by ionization potential	2D autocorrelations
ATS4i	Broto-Moreau autocorrelation of lag 4 (log function) weighted by ionization potential	2D autocorrelations
ATS5i	Broto-Moreau autocorrelation of lag 5 (log function) weighted by ionization potential	2D autocorrelations
ATS6i	Broto-Moreau autocorrelation of lag 6 (log function) weighted by ionization potential	2D autocorrelations
ATS7i	Broto-Moreau autocorrelation of lag 7 (log function) weighted by ionization potential	2D autocorrelations
ATS8i	Broto-Moreau autocorrelation of lag 8 (log function) weighted by ionization potential	2D autocorrelations
ATS1s	Broto-Moreau autocorrelation of lag 1 (log function) weighted by I-state	2D autocorrelations
ATS2s	Broto-Moreau autocorrelation of lag 2 (log function) weighted by I-state	2D autocorrelations
ATS3s	Broto-Moreau autocorrelation of lag 3 (log function) weighted by I-state	2D autocorrelations
ATS4s	Broto-Moreau autocorrelation of lag 4 (log function) weighted by I-state	2D autocorrelations
ATS5s	Broto-Moreau autocorrelation of lag 5 (log function) weighted by I-state	2D autocorrelations
ATS6s	Broto-Moreau autocorrelation of lag 6 (log function) weighted by I-state	2D autocorrelations
ATS7s	Broto-Moreau autocorrelation of lag 7 (log function) weighted by I-state	2D autocorrelations
ATS8s	Broto-Moreau autocorrelation of lag 8 (log function) weighted by I-state	2D autocorrelations
ATSC1m	Centred Broto-Moreau autocorrelation of lag 1 weighted by mass	2D autocorrelations
ATSC2m	Centred Broto-Moreau autocorrelation of lag 2 weighted by mass	2D autocorrelations
ATSC3m	Centred Broto-Moreau autocorrelation of lag 3 weighted by mass	2D autocorrelations
ATSC4m	Centred Broto-Moreau autocorrelation of lag 4 weighted by mass	2D autocorrelations
ATSC5m	Centred Broto-Moreau autocorrelation of lag 5 weighted by mass	2D autocorrelations
ATSC6m	Centred Broto-Moreau autocorrelation of lag 6 weighted by mass	2D autocorrelations
ATSC7m	Centred Broto-Moreau autocorrelation of lag 7 weighted by mass	2D autocorrelations
ATSC8m	Centred Broto-Moreau autocorrelation of lag 8 weighted by mass	2D autocorrelations
ATSC1v	Centred Broto-Moreau autocorrelation of lag 1 weighted by van der Waals volume	2D autocorrelations
ATSC2v	Centred Broto-Moreau autocorrelation of lag 2 weighted by van der Waals volume	2D autocorrelations
ATSC3v	Centred Broto-Moreau autocorrelation of lag 3 weighted by van der Waals volume	2D autocorrelations
ATSC4v	Centred Broto-Moreau autocorrelation of lag 4 weighted by van der Waals volume	2D autocorrelations
ATSC5v	Centred Broto-Moreau autocorrelation of lag 5 weighted by van der Waals volume	2D autocorrelations
ATSC6v	Centred Broto-Moreau autocorrelation of lag 6 weighted by van der Waals volume	2D autocorrelations
ATSC7v	Centred Broto-Moreau autocorrelation of lag 7 weighted by van der Waals volume	2D autocorrelations
ATSC8v	Centred Broto-Moreau autocorrelation of lag 8 weighted by van der Waals volume	2D autocorrelations
ATSC1e	Centred Broto-Moreau autocorrelation of lag 1 weighted by Sanderson electronegativity	2D autocorrelations
ATSC2e	Centred Broto-Moreau autocorrelation of lag 2 weighted by Sanderson electronegativity	2D autocorrelations
ATSC3e	Centred Broto-Moreau autocorrelation of lag 3 weighted by Sanderson electronegativity	2D autocorrelations
ATSC4e	Centred Broto-Moreau autocorrelation of lag 4 weighted by Sanderson electronegativity	2D autocorrelations
ATSC5e	Centred Broto-Moreau autocorrelation of lag 5 weighted by Sanderson electronegativity	2D autocorrelations
ATSC6e	Centred Broto-Moreau autocorrelation of lag 6 weighted by Sanderson electronegativity	2D autocorrelations
ATSC7e	Centred Broto-Moreau autocorrelation of lag 7 weighted by Sanderson electronegativity	2D autocorrelations
ATSC8e	Centred Broto-Moreau autocorrelation of lag 8 weighted by Sanderson electronegativity	2D autocorrelations
ATSC1p	Centred Broto-Moreau autocorrelation of lag 1 weighted by polarizability	2D autocorrelations
ATSC2p	Centred Broto-Moreau autocorrelation of lag 2 weighted by polarizability	2D autocorrelations
ATSC3p	Centred Broto-Moreau autocorrelation of lag 3 weighted by polarizability	2D autocorrelations
ATSC4p	Centred Broto-Moreau autocorrelation of lag 4 weighted by polarizability	2D autocorrelations
ATSC5p	Centred Broto-Moreau autocorrelation of lag 5 weighted by polarizability	2D autocorrelations
ATSC6p	Centred Broto-Moreau autocorrelation of lag 6 weighted by polarizability	2D autocorrelations
ATSC7p	Centred Broto-Moreau autocorrelation of lag 7 weighted by polarizability	2D autocorrelations
ATSC8p	Centred Broto-Moreau autocorrelation of lag 8 weighted by polarizability	2D autocorrelations
ATSC1i	Centred Broto-Moreau autocorrelation of lag 1 weighted by ionization potential	2D autocorrelations
ATSC2i	Centred Broto-Moreau autocorrelation of lag 2 weighted by ionization potential	2D autocorrelations
ATSC3i	Centred Broto-Moreau autocorrelation of lag 3 weighted by ionization potential	2D autocorrelations
ATSC4i	Centred Broto-Moreau autocorrelation of lag 4 weighted by ionization potential	2D autocorrelations
ATSC5i	Centred Broto-Moreau autocorrelation of lag 5 weighted by ionization potential	2D autocorrelations
ATSC6i	Centred Broto-Moreau autocorrelation of lag 6 weighted by ionization potential	2D autocorrelations
ATSC7i	Centred Broto-Moreau autocorrelation of lag 7 weighted by ionization potential	2D autocorrelations
ATSC8i	Centred Broto-Moreau autocorrelation of lag 8 weighted by ionization potential	2D autocorrelations
ATSC1s	Centred Broto-Moreau autocorrelation of lag 1 weighted by I-state	2D autocorrelations
ATSC2s	Centred Broto-Moreau autocorrelation of lag 2 weighted by I-state	2D autocorrelations
ATSC3s	Centred Broto-Moreau autocorrelation of lag 3 weighted by I-state	2D autocorrelations
ATSC4s	Centred Broto-Moreau autocorrelation of lag 4 weighted by I-state	2D autocorrelations
ATSC5s	Centred Broto-Moreau autocorrelation of lag 5 weighted by I-state	2D autocorrelations
ATSC6s	Centred Broto-Moreau autocorrelation of lag 6 weighted by I-state	2D autocorrelations
ATSC7s	Centred Broto-Moreau autocorrelation of lag 7 weighted by I-state	2D autocorrelations
ATSC8s	Centred Broto-Moreau autocorrelation of lag 8 weighted by I-state	2D autocorrelations
MATS1m	Moran autocorrelation of lag 1 weighted by mass	2D autocorrelations
MATS2m	Moran autocorrelation of lag 2 weighted by mass	2D autocorrelations
MATS3m	Moran autocorrelation of lag 3 weighted by mass	2D autocorrelations
MATS4m	Moran autocorrelation of lag 4 weighted by mass	2D autocorrelations
MATS5m	Moran autocorrelation of lag 5 weighted by mass	2D autocorrelations
MATS6m	Moran autocorrelation of lag 6 weighted by mass	2D autocorrelations
MATS7m	Moran autocorrelation of lag 7 weighted by mass	2D autocorrelations
MATS8m	Moran autocorrelation of lag 8 weighted by mass	2D autocorrelations
MATS1v	Moran autocorrelation of lag 1 weighted by van der Waals volume	2D autocorrelations
MATS2v	Moran autocorrelation of lag 2 weighted by van der Waals volume	2D autocorrelations
MATS3v	Moran autocorrelation of lag 3 weighted by van der Waals volume	2D autocorrelations
MATS4v	Moran autocorrelation of lag 4 weighted by van der Waals volume	2D autocorrelations
MATS5v	Moran autocorrelation of lag 5 weighted by van der Waals volume	2D autocorrelations
MATS6v	Moran autocorrelation of lag 6 weighted by van der Waals volume	2D autocorrelations
MATS7v	Moran autocorrelation of lag 7 weighted by van der Waals volume	2D autocorrelations
MATS8v	Moran autocorrelation of lag 8 weighted by van der Waals volume	2D autocorrelations
MATS1e	Moran autocorrelation of lag 1 weighted by Sanderson electronegativity	2D autocorrelations
MATS2e	Moran autocorrelation of lag 2 weighted by Sanderson electronegativity	2D autocorrelations
MATS3e	Moran autocorrelation of lag 3 weighted by Sanderson electronegativity	2D autocorrelations
MATS4e	Moran autocorrelation of lag 4 weighted by Sanderson electronegativity	2D autocorrelations
MATS5e	Moran autocorrelation of lag 5 weighted by Sanderson electronegativity	2D autocorrelations
MATS6e	Moran autocorrelation of lag 6 weighted by Sanderson electronegativity	2D autocorrelations
MATS7e	Moran autocorrelation of lag 7 weighted by Sanderson electronegativity	2D autocorrelations
MATS8e	Moran autocorrelation of lag 8 weighted by Sanderson electronegativity	2D autocorrelations
MATS1p	Moran autocorrelation of lag 1 weighted by polarizability	2D autocorrelations
MATS2p	Moran autocorrelation of lag 2 weighted by polarizability	2D autocorrelations
MATS3p	Moran autocorrelation of lag 3 weighted by polarizability	2D autocorrelations
MATS4p	Moran autocorrelation of lag 4 weighted by polarizability	2D autocorrelations
MATS5p	Moran autocorrelation of lag 5 weighted by polarizability	2D autocorrelations
MATS6p	Moran autocorrelation of lag 6 weighted by polarizability	2D autocorrelations
MATS7p	Moran autocorrelation of lag 7 weighted by polarizability	2D autocorrelations
MATS8p	Moran autocorrelation of lag 8 weighted by polarizability	2D autocorrelations
MATS1i	Moran autocorrelation of lag 1 weighted by ionization potential	2D autocorrelations
MATS2i	Moran autocorrelation of lag 2 weighted by ionization potential	2D autocorrelations
MATS3i	Moran autocorrelation of lag 3 weighted by ionization potential	2D autocorrelations
MATS4i	Moran autocorrelation of lag 4 weighted by ionization potential	2D autocorrelations
MATS5i	Moran autocorrelation of lag 5 weighted by ionization potential	2D autocorrelations
MATS6i	Moran autocorrelation of lag 6 weighted by ionization potential	2D autocorrelations
MATS7i	Moran autocorrelation of lag 7 weighted by ionization potential	2D autocorrelations
MATS8i	Moran autocorrelation of lag 8 weighted by ionization potential	2D autocorrelations
MATS1s	Moran autocorrelation of lag 1 weighted by I-state	2D autocorrelations
MATS2s	Moran autocorrelation of lag 2 weighted by I-state	2D autocorrelations
MATS3s	Moran autocorrelation of lag 3 weighted by I-state	2D autocorrelations
MATS4s	Moran autocorrelation of lag 4 weighted by I-state	2D autocorrelations
MATS5s	Moran autocorrelation of lag 5 weighted by I-state	2D autocorrelations
MATS6s	Moran autocorrelation of lag 6 weighted by I-state	2D autocorrelations
MATS7s	Moran autocorrelation of lag 7 weighted by I-state	2D autocorrelations
MATS8s	Moran autocorrelation of lag 8 weighted by I-state	2D autocorrelations
GATS1m	Geary autocorrelation of lag 1 weighted by mass	2D autocorrelations
GATS2m	Geary autocorrelation of lag 2 weighted by mass	2D autocorrelations
GATS3m	Geary autocorrelation of lag 3 weighted by mass	2D autocorrelations
GATS4m	Geary autocorrelation of lag 4 weighted by mass	2D autocorrelations
GATS5m	Geary autocorrelation of lag 5 weighted by mass	2D autocorrelations
GATS6m	Geary autocorrelation of lag 6 weighted by mass	2D autocorrelations
GATS7m	Geary autocorrelation of lag 7 weighted by mass	2D autocorrelations
GATS8m	Geary autocorrelation of lag 8 weighted by mass	2D autocorrelations
GATS1v	Geary autocorrelation of lag 1 weighted by van der Waals volume	2D autocorrelations
GATS2v	Geary autocorrelation of lag 2 weighted by van der Waals volume	2D autocorrelations
GATS3v	Geary autocorrelation of lag 3 weighted by van der Waals volume	2D autocorrelations
GATS4v	Geary autocorrelation of lag 4 weighted by van der Waals volume	2D autocorrelations
GATS5v	Geary autocorrelation of lag 5 weighted by van der Waals volume	2D autocorrelations
GATS6v	Geary autocorrelation of lag 6 weighted by van der Waals volume	2D autocorrelations
GATS7v	Geary autocorrelation of lag 7 weighted by van der Waals volume	2D autocorrelations
GATS8v	Geary autocorrelation of lag 8 weighted by van der Waals volume	2D autocorrelations
GATS1e	Geary autocorrelation of lag 1 weighted by Sanderson electronegativity	2D autocorrelations
GATS2e	Geary autocorrelation of lag 2 weighted by Sanderson electronegativity	2D autocorrelations
GATS3e	Geary autocorrelation of lag 3 weighted by Sanderson electronegativity	2D autocorrelations
GATS4e	Geary autocorrelation of lag 4 weighted by Sanderson electronegativity	2D autocorrelations
GATS5e	Geary autocorrelation of lag 5 weighted by Sanderson electronegativity	2D autocorrelations
GATS6e	Geary autocorrelation of lag 6 weighted by Sanderson electronegativity	2D autocorrelations
GATS7e	Geary autocorrelation of lag 7 weighted by Sanderson electronegativity	2D autocorrelations
GATS8e	Geary autocorrelation of lag 8 weighted by Sanderson electronegativity	2D autocorrelations
GATS1p	Geary autocorrelation of lag 1 weighted by polarizability	2D autocorrelations
GATS2p	Geary autocorrelation of lag 2 weighted by polarizability	2D autocorrelations
GATS3p	Geary autocorrelation of lag 3 weighted by polarizability	2D autocorrelations
GATS4p	Geary autocorrelation of lag 4 weighted by polarizability	2D autocorrelations
GATS5p	Geary autocorrelation of lag 5 weighted by polarizability	2D autocorrelations
GATS6p	Geary autocorrelation of lag 6 weighted by polarizability	2D autocorrelations
GATS7p	Geary autocorrelation of lag 7 weighted by polarizability	2D autocorrelations
GATS8p	Geary autocorrelation of lag 8 weighted by polarizability	2D autocorrelations
GATS1i	Geary autocorrelation of lag 1 weighted by ionization potential	2D autocorrelations
GATS2i	Geary autocorrelation of lag 2 weighted by ionization potential	2D autocorrelations
GATS3i	Geary autocorrelation of lag 3 weighted by ionization potential	2D autocorrelations
GATS4i	Geary autocorrelation of lag 4 weighted by ionization potential	2D autocorrelations
GATS5i	Geary autocorrelation of lag 5 weighted by ionization potential	2D autocorrelations
GATS6i	Geary autocorrelation of lag 6 weighted by ionization potential	2D autocorrelations
GATS7i	Geary autocorrelation of lag 7 weighted by ionization potential	2D autocorrelations
GATS8i	Geary autocorrelation of lag 8 weighted by ionization potential	2D autocorrelations
GATS1s	Geary autocorrelation of lag 1 weighted by I-state	2D autocorrelations
GATS2s	Geary autocorrelation of lag 2 weighted by I-state	2D autocorrelations
GATS3s	Geary autocorrelation of lag 3 weighted by I-state	2D autocorrelations
GATS4s	Geary autocorrelation of lag 4 weighted by I-state	2D autocorrelations
GATS5s	Geary autocorrelation of lag 5 weighted by I-state	2D autocorrelations
GATS6s	Geary autocorrelation of lag 6 weighted by I-state	2D autocorrelations
GATS7s	Geary autocorrelation of lag 7 weighted by I-state	2D autocorrelations
GATS8s	Geary autocorrelation of lag 8 weighted by I-state	2D autocorrelations
GGI1	topological charge index of order 1	2D autocorrelations
GGI2	topological charge index of order 2	2D autocorrelations
GGI3	topological charge index of order 3	2D autocorrelations
GGI4	topological charge index of order 4	2D autocorrelations
GGI5	topological charge index of order 5	2D autocorrelations
GGI6	topological charge index of order 6	2D autocorrelations
GGI7	topological charge index of order 7	2D autocorrelations
GGI8	topological charge index of order 8	2D autocorrelations
GGI9	topological charge index of order 9	2D autocorrelations
GGI10	topological charge index of order 10	2D autocorrelations
JGI1	mean topological charge index of order 1	2D autocorrelations
JGI2	mean topological charge index of order 2	2D autocorrelations
JGI3	mean topological charge index of order 3	2D autocorrelations
JGI4	mean topological charge index of order 4	2D autocorrelations
JGI5	mean topological charge index of order 5	2D autocorrelations
JGI6	mean topological charge index of order 6	2D autocorrelations
JGI7	mean topological charge index of order 7	2D autocorrelations
JGI8	mean topological charge index of order 8	2D autocorrelations
JGI9	mean topological charge index of order 9	2D autocorrelations
JGI10	mean topological charge index of order 10	2D autocorrelations
JGT	global topological charge index	2D autocorrelations
SpMax1_Bh(m)	largest eigenvalue n. 1 of Burden matrix weighted by mass	Burden eigenvalues
SpMax2_Bh(m)	largest eigenvalue n. 2 of Burden matrix weighted by mass	Burden eigenvalues
SpMax3_Bh(m)	largest eigenvalue n. 3 of Burden matrix weighted by mass	Burden eigenvalues
SpMax4_Bh(m)	largest eigenvalue n. 4 of Burden matrix weighted by mass	Burden eigenvalues
SpMax5_Bh(m)	largest eigenvalue n. 5 of Burden matrix weighted by mass	Burden eigenvalues
SpMax6_Bh(m)	largest eigenvalue n. 6 of Burden matrix weighted by mass	Burden eigenvalues
SpMax7_Bh(m)	largest eigenvalue n. 7 of Burden matrix weighted by mass	Burden eigenvalues
SpMax8_Bh(m)	largest eigenvalue n. 8 of Burden matrix weighted by mass	Burden eigenvalues
SpMax1_Bh(v)	largest eigenvalue n. 1 of Burden matrix weighted by van der Waals volume	Burden eigenvalues
SpMax2_Bh(v)	largest eigenvalue n. 2 of Burden matrix weighted by van der Waals volume	Burden eigenvalues
SpMax3_Bh(v)	largest eigenvalue n. 3 of Burden matrix weighted by van der Waals volume	Burden eigenvalues
SpMax4_Bh(v)	largest eigenvalue n. 4 of Burden matrix weighted by van der Waals volume	Burden eigenvalues
SpMax5_Bh(v)	largest eigenvalue n. 5 of Burden matrix weighted by van der Waals volume	Burden eigenvalues
SpMax6_Bh(v)	largest eigenvalue n. 6 of Burden matrix weighted by van der Waals volume	Burden eigenvalues
SpMax7_Bh(v)	largest eigenvalue n. 7 of Burden matrix weighted by van der Waals volume	Burden eigenvalues
SpMax8_Bh(v)	largest eigenvalue n. 8 of Burden matrix weighted by van der Waals volume	Burden eigenvalues
SpMax1_Bh(e)	largest eigenvalue n. 1 of Burden matrix weighted by Sanderson electronegativity	Burden eigenvalues
SpMax2_Bh(e)	largest eigenvalue n. 2 of Burden matrix weighted by Sanderson electronegativity	Burden eigenvalues
SpMax3_Bh(e)	largest eigenvalue n. 3 of Burden matrix weighted by Sanderson electronegativity	Burden eigenvalues
SpMax4_Bh(e)	largest eigenvalue n. 4 of Burden matrix weighted by Sanderson electronegativity	Burden eigenvalues
SpMax5_Bh(e)	largest eigenvalue n. 5 of Burden matrix weighted by Sanderson electronegativity	Burden eigenvalues
SpMax6_Bh(e)	largest eigenvalue n. 6 of Burden matrix weighted by Sanderson electronegativity	Burden eigenvalues
SpMax7_Bh(e)	largest eigenvalue n. 7 of Burden matrix weighted by Sanderson electronegativity	Burden eigenvalues
SpMax8_Bh(e)	largest eigenvalue n. 8 of Burden matrix weighted by Sanderson electronegativity	Burden eigenvalues
SpMax1_Bh(p)	largest eigenvalue n. 1 of Burden matrix weighted by polarizability	Burden eigenvalues
SpMax2_Bh(p)	largest eigenvalue n. 2 of Burden matrix weighted by polarizability	Burden eigenvalues
SpMax3_Bh(p)	largest eigenvalue n. 3 of Burden matrix weighted by polarizability	Burden eigenvalues
SpMax4_Bh(p)	largest eigenvalue n. 4 of Burden matrix weighted by polarizability	Burden eigenvalues
SpMax5_Bh(p)	largest eigenvalue n. 5 of Burden matrix weighted by polarizability	Burden eigenvalues
SpMax6_Bh(p)	largest eigenvalue n. 6 of Burden matrix weighted by polarizability	Burden eigenvalues
SpMax7_Bh(p)	largest eigenvalue n. 7 of Burden matrix weighted by polarizability	Burden eigenvalues
SpMax8_Bh(p)	largest eigenvalue n. 8 of Burden matrix weighted by polarizability	Burden eigenvalues
SpMax1_Bh(i)	largest eigenvalue n. 1 of Burden matrix weighted by ionization potential	Burden eigenvalues
SpMax2_Bh(i)	largest eigenvalue n. 2 of Burden matrix weighted by ionization potential	Burden eigenvalues
SpMax3_Bh(i)	largest eigenvalue n. 3 of Burden matrix weighted by ionization potential	Burden eigenvalues
SpMax4_Bh(i)	largest eigenvalue n. 4 of Burden matrix weighted by ionization potential	Burden eigenvalues
SpMax5_Bh(i)	largest eigenvalue n. 5 of Burden matrix weighted by ionization potential	Burden eigenvalues
SpMax6_Bh(i)	largest eigenvalue n. 6 of Burden matrix weighted by ionization potential	Burden eigenvalues
SpMax7_Bh(i)	largest eigenvalue n. 7 of Burden matrix weighted by ionization potential	Burden eigenvalues
SpMax8_Bh(i)	largest eigenvalue n. 8 of Burden matrix weighted by ionization potential	Burden eigenvalues
SpMax1_Bh(s)	largest eigenvalue n. 1 of Burden matrix weighted by I-state	Burden eigenvalues
SpMax2_Bh(s)	largest eigenvalue n. 2 of Burden matrix weighted by I-state	Burden eigenvalues
SpMax3_Bh(s)	largest eigenvalue n. 3 of Burden matrix weighted by I-state	Burden eigenvalues
SpMax4_Bh(s)	largest eigenvalue n. 4 of Burden matrix weighted by I-state	Burden eigenvalues
SpMax5_Bh(s)	largest eigenvalue n. 5 of Burden matrix weighted by I-state	Burden eigenvalues
SpMax6_Bh(s)	largest eigenvalue n. 6 of Burden matrix weighted by I-state	Burden eigenvalues
SpMax7_Bh(s)	largest eigenvalue n. 7 of Burden matrix weighted by I-state	Burden eigenvalues
SpMax8_Bh(s)	largest eigenvalue n. 8 of Burden matrix weighted by I-state	Burden eigenvalues
SpMin1_Bh(m)	smallest eigenvalue n. 1 of Burden matrix weighted by mass	Burden eigenvalues
SpMin2_Bh(m)	smallest eigenvalue n. 2 of Burden matrix weighted by mass	Burden eigenvalues
SpMin3_Bh(m)	smallest eigenvalue n. 3 of Burden matrix weighted by mass	Burden eigenvalues
SpMin4_Bh(m)	smallest eigenvalue n. 4 of Burden matrix weighted by mass	Burden eigenvalues
SpMin5_Bh(m)	smallest eigenvalue n. 5 of Burden matrix weighted by mass	Burden eigenvalues
SpMin6_Bh(m)	smallest eigenvalue n. 6 of Burden matrix weighted by mass	Burden eigenvalues
SpMin7_Bh(m)	smallest eigenvalue n. 7 of Burden matrix weighted by mass	Burden eigenvalues
SpMin8_Bh(m)	smallest eigenvalue n. 8 of Burden matrix weighted by mass	Burden eigenvalues
SpMin1_Bh(v)	smallest eigenvalue n. 1 of Burden matrix weighted by van der Waals volume	Burden eigenvalues
SpMin2_Bh(v)	smallest eigenvalue n. 2 of Burden matrix weighted by van der Waals volume	Burden eigenvalues
SpMin3_Bh(v)	smallest eigenvalue n. 3 of Burden matrix weighted by van der Waals volume	Burden eigenvalues
SpMin4_Bh(v)	smallest eigenvalue n. 4 of Burden matrix weighted by van der Waals volume	Burden eigenvalues
SpMin5_Bh(v)	smallest eigenvalue n. 5 of Burden matrix weighted by van der Waals volume	Burden eigenvalues
SpMin6_Bh(v)	smallest eigenvalue n. 6 of Burden matrix weighted by van der Waals volume	Burden eigenvalues
SpMin7_Bh(v)	smallest eigenvalue n. 7 of Burden matrix weighted by van der Waals volume	Burden eigenvalues
SpMin8_Bh(v)	smallest eigenvalue n. 8 of Burden matrix weighted by van der Waals volume	Burden eigenvalues
SpMin1_Bh(e)	smallest eigenvalue n. 1 of Burden matrix weighted by Sanderson electronegativity	Burden eigenvalues
SpMin2_Bh(e)	smallest eigenvalue n. 2 of Burden matrix weighted by Sanderson electronegativity	Burden eigenvalues
SpMin3_Bh(e)	smallest eigenvalue n. 3 of Burden matrix weighted by Sanderson electronegativity	Burden eigenvalues
SpMin4_Bh(e)	smallest eigenvalue n. 4 of Burden matrix weighted by Sanderson electronegativity	Burden eigenvalues
SpMin5_Bh(e)	smallest eigenvalue n. 5 of Burden matrix weighted by Sanderson electronegativity	Burden eigenvalues
SpMin6_Bh(e)	smallest eigenvalue n. 6 of Burden matrix weighted by Sanderson electronegativity	Burden eigenvalues
SpMin7_Bh(e)	smallest eigenvalue n. 7 of Burden matrix weighted by Sanderson electronegativity	Burden eigenvalues
SpMin8_Bh(e)	smallest eigenvalue n. 8 of Burden matrix weighted by Sanderson electronegativity	Burden eigenvalues
SpMin1_Bh(p)	smallest eigenvalue n. 1 of Burden matrix weighted by polarizability	Burden eigenvalues
SpMin2_Bh(p)	smallest eigenvalue n. 2 of Burden matrix weighted by polarizability	Burden eigenvalues
SpMin3_Bh(p)	smallest eigenvalue n. 3 of Burden matrix weighted by polarizability	Burden eigenvalues
SpMin4_Bh(p)	smallest eigenvalue n. 4 of Burden matrix weighted by polarizability	Burden eigenvalues
SpMin5_Bh(p)	smallest eigenvalue n. 5 of Burden matrix weighted by polarizability	Burden eigenvalues
SpMin6_Bh(p)	smallest eigenvalue n. 6 of Burden matrix weighted by polarizability	Burden eigenvalues
SpMin7_Bh(p)	smallest eigenvalue n. 7 of Burden matrix weighted by polarizability	Burden eigenvalues
SpMin8_Bh(p)	smallest eigenvalue n. 8 of Burden matrix weighted by polarizability	Burden eigenvalues
SpMin1_Bh(i)	smallest eigenvalue n. 1 of Burden matrix weighted by ionization potential	Burden eigenvalues
SpMin2_Bh(i)	smallest eigenvalue n. 2 of Burden matrix weighted by ionization potential	Burden eigenvalues
SpMin3_Bh(i)	smallest eigenvalue n. 3 of Burden matrix weighted by ionization potential	Burden eigenvalues
SpMin4_Bh(i)	smallest eigenvalue n. 4 of Burden matrix weighted by ionization potential	Burden eigenvalues
SpMin5_Bh(i)	smallest eigenvalue n. 5 of Burden matrix weighted by ionization potential	Burden eigenvalues
SpMin6_Bh(i)	smallest eigenvalue n. 6 of Burden matrix weighted by ionization potential	Burden eigenvalues
SpMin7_Bh(i)	smallest eigenvalue n. 7 of Burden matrix weighted by ionization potential	Burden eigenvalues
SpMin8_Bh(i)	smallest eigenvalue n. 8 of Burden matrix weighted by ionization potential	Burden eigenvalues
SpMin1_Bh(s)	smallest eigenvalue n. 1 of Burden matrix weighted by I-state	Burden eigenvalues
SpMin2_Bh(s)	smallest eigenvalue n. 2 of Burden matrix weighted by I-state	Burden eigenvalues
SpMin3_Bh(s)	smallest eigenvalue n. 3 of Burden matrix weighted by I-state	Burden eigenvalues
SpMin4_Bh(s)	smallest eigenvalue n. 4 of Burden matrix weighted by I-state	Burden eigenvalues
SpMin5_Bh(s)	smallest eigenvalue n. 5 of Burden matrix weighted by I-state	Burden eigenvalues
SpMin6_Bh(s)	smallest eigenvalue n. 6 of Burden matrix weighted by I-state	Burden eigenvalues
SpMin7_Bh(s)	smallest eigenvalue n. 7 of Burden matrix weighted by I-state	Burden eigenvalues
SpMin8_Bh(s)	smallest eigenvalue n. 8 of Burden matrix weighted by I-state	Burden eigenvalues
P_VSA_LogP_1	P_VSA-like on LogP, bin 1	P_VSA-like descriptors
P_VSA_LogP_2	P_VSA-like on LogP, bin 2	P_VSA-like descriptors
P_VSA_LogP_3	P_VSA-like on LogP, bin 3	P_VSA-like descriptors
P_VSA_LogP_4	P_VSA-like on LogP, bin 4	P_VSA-like descriptors
P_VSA_LogP_5	P_VSA-like on LogP, bin 5	P_VSA-like descriptors
P_VSA_LogP_6	P_VSA-like on LogP, bin 6	P_VSA-like descriptors
P_VSA_LogP_7	P_VSA-like on LogP, bin 7	P_VSA-like descriptors
P_VSA_LogP_8	P_VSA-like on LogP, bin 8	P_VSA-like descriptors
P_VSA_MR_1	P_VSA-like on Molar Refractivity, bin 1	P_VSA-like descriptors
P_VSA_MR_2	P_VSA-like on Molar Refractivity, bin 2	P_VSA-like descriptors
P_VSA_MR_3	P_VSA-like on Molar Refractivity, bin 3	P_VSA-like descriptors
P_VSA_MR_4	P_VSA-like on Molar Refractivity, bin 4	P_VSA-like descriptors
P_VSA_MR_5	P_VSA-like on Molar Refractivity, bin 5	P_VSA-like descriptors
P_VSA_MR_6	P_VSA-like on Molar Refractivity, bin 6	P_VSA-like descriptors
P_VSA_MR_7	P_VSA-like on Molar Refractivity, bin 7	P_VSA-like descriptors
P_VSA_MR_8	P_VSA-like on Molar Refractivity, bin 8	P_VSA-like descriptors
P_VSA_m_1	P_VSA-like on mass, bin 1	P_VSA-like descriptors
P_VSA_m_2	P_VSA-like on mass, bin 2	P_VSA-like descriptors
P_VSA_m_3	P_VSA-like on mass, bin 3	P_VSA-like descriptors
P_VSA_m_4	P_VSA-like on mass, bin 4	P_VSA-like descriptors
P_VSA_m_5	P_VSA-like on mass, bin 5	P_VSA-like descriptors
P_VSA_v_1	P_VSA-like on van der Waals volume, bin 1	P_VSA-like descriptors
P_VSA_v_2	P_VSA-like on van der Waals volume, bin 2	P_VSA-like descriptors
P_VSA_v_3	P_VSA-like on van der Waals volume, bin 3	P_VSA-like descriptors
P_VSA_v_4	P_VSA-like on van der Waals volume, bin 4	P_VSA-like descriptors
P_VSA_e_1	P_VSA-like on Sanderson electronegativity, bin 1	P_VSA-like descriptors
P_VSA_e_2	P_VSA-like on Sanderson electronegativity, bin 2	P_VSA-like descriptors
P_VSA_e_3	P_VSA-like on Sanderson electronegativity, bin 3	P_VSA-like descriptors
P_VSA_e_4	P_VSA-like on Sanderson electronegativity, bin 4	P_VSA-like descriptors
P_VSA_e_5	P_VSA-like on Sanderson electronegativity, bin 5	P_VSA-like descriptors
P_VSA_e_6	P_VSA-like on Sanderson electronegativity, bin 6	P_VSA-like descriptors
P_VSA_p_1	P_VSA-like on polarizability, bin 1	P_VSA-like descriptors
P_VSA_p_2	P_VSA-like on polarizability, bin 2	P_VSA-like descriptors
P_VSA_p_3	P_VSA-like on polarizability, bin 3	P_VSA-like descriptors
P_VSA_p_4	P_VSA-like on polarizability, bin 4	P_VSA-like descriptors
P_VSA_i_1	P_VSA-like on ionization potential, bin 1	P_VSA-like descriptors
P_VSA_i_2	P_VSA-like on ionization potential, bin 2	P_VSA-like descriptors
P_VSA_i_3	P_VSA-like on ionization potential, bin 3	P_VSA-like descriptors
P_VSA_i_4	P_VSA-like on ionization potential, bin 4	P_VSA-like descriptors
P_VSA_s_1	P_VSA-like on I-state, bin 1	P_VSA-like descriptors
P_VSA_s_2	P_VSA-like on I-state, bin 2	P_VSA-like descriptors
P_VSA_s_3	P_VSA-like on I-state, bin 3	P_VSA-like descriptors
P_VSA_s_4	P_VSA-like on I-state, bin 4	P_VSA-like descriptors
P_VSA_s_5	P_VSA-like on I-state, bin 5	P_VSA-like descriptors
P_VSA_s_6	P_VSA-like on I-state, bin 6	P_VSA-like descriptors
P_VSA_ppp_L	P_VSA-like on potential pharmacophore points, L - lipophilic	P_VSA-like descriptors
P_VSA_ppp_P	P_VSA-like on potential pharmacophore points, P - positive	P_VSA-like descriptors
P_VSA_ppp_N	P_VSA-like on potential pharmacophore points, N - negative	P_VSA-like descriptors
P_VSA_ppp_D	P_VSA-like on potential pharmacophore points, D - hydrogen-bond donor	P_VSA-like descriptors
P_VSA_ppp_A	P_VSA-like on potential pharmacophore points, A - hydrogen-bond acceptor	P_VSA-like descriptors
P_VSA_ppp_ar	P_VSA-like on potential pharmacophore points, ar - aromatic atoms	P_VSA-like descriptors
P_VSA_ppp_con	P_VSA-like on potential pharmacophore points, con - conjugated atoms	P_VSA-like descriptors
P_VSA_ppp_hal	P_VSA-like on potential pharmacophore points, hal - halogen atoms	P_VSA-like descriptors
P_VSA_ppp_cyc	P_VSA-like on potential pharmacophore points, cyc - atoms belonging to cycles	P_VSA-like descriptors
P_VSA_ppp_ter	P_VSA-like on potential pharmacophore points, ter - terminal atoms	P_VSA-like descriptors
P_VSA_charge_1	P_VSA-like on partial charges, bin 1	P_VSA-like descriptors
P_VSA_charge_2	P_VSA-like on partial charges, bin 2	P_VSA-like descriptors
P_VSA_charge_3	P_VSA-like on partial charges, bin 3	P_VSA-like descriptors
P_VSA_charge_4	P_VSA-like on partial charges, bin 4	P_VSA-like descriptors
P_VSA_charge_5	P_VSA-like on partial charges, bin 5	P_VSA-like descriptors
P_VSA_charge_6	P_VSA-like on partial charges, bin 6	P_VSA-like descriptors
P_VSA_charge_7	P_VSA-like on partial charges, bin 7	P_VSA-like descriptors
P_VSA_charge_8	P_VSA-like on partial charges, bin 8	P_VSA-like descriptors
P_VSA_charge_9	P_VSA-like on partial charges, bin 9	P_VSA-like descriptors
P_VSA_charge_10	P_VSA-like on partial charges, bin 10	P_VSA-like descriptors
P_VSA_charge_11	P_VSA-like on partial charges, bin 11	P_VSA-like descriptors
P_VSA_charge_12	P_VSA-like on partial charges, bin 12	P_VSA-like descriptors
P_VSA_charge_13	P_VSA-like on partial charges, bin 13	P_VSA-like descriptors
P_VSA_charge_14	P_VSA-like on partial charges, bin 14	P_VSA-like descriptors
Eta_alpha	eta core count	ETA indices
Eta_alpha_A	eta average core count	ETA indices
Eta_epsi	eta electronegativity measure	ETA indices
Eta_epsi_A	eta average electronegativity measure	ETA indices
Eta_betaS	eta sigma VEM count	ETA indices
Eta_betaS_A	eta sigma average VEM count	ETA indices
Eta_betaP	eta pi and lone pair VEM count	ETA indices
Eta_betaP_A	eta pi and lone pair average VEM count	ETA indices
Eta_beta	eta VEM count	ETA indices
Eta_beta_A	eta average VEM count	ETA indices
Eta_C	eta composite index	ETA indices
Eta_C_A	eta average composite index	ETA indices
Eta_L	eta local composite index	ETA indices
Eta_L_A	eta average local composite index	ETA indices
Eta_R	eta composite index for reference alkane	ETA indices
Eta_F	eta functionality index	ETA indices
Eta_F_A	eta average functionality index	ETA indices
Eta_LR	eta local composite index for reference alkane	ETA indices
Eta_FL	eta local functionality index	ETA indices
Eta_FL_A	eta average local functionality index	ETA indices
Eta_B	eta branching index	ETA indices
Eta_B_A	eta average branching index	ETA indices
Eta_sh_p	eta p shape index	ETA indices
Eta_sh_y	eta y shape index	ETA indices
Eta_sh_x	eta x shape index	ETA indices
Eta_D_AlphaA	eta delta alpha a index	ETA indices
Eta_D_AlphaB	eta delta alpha b index	ETA indices
Eta_epsi_2	eta electronegativity measure 2	ETA indices
Eta_epsi_3	eta electronegativity measure 3	ETA indices
Eta_epsi_4	eta electronegativity measure 4	ETA indices
Eta_epsi_5	eta electronegativity measure 5	ETA indices
Eta_D_epsiA	eta measure of unsaturation and electronegative atom count	ETA indices
Eta_D_epsiB	eta measure of unsaturation	ETA indices
Eta_D_epsiC	eta measure of electronegativity	ETA indices
Eta_D_epsiD	eta measure of hydrogen bond donor atoms	ETA indices
Eta_psi1	eta measure of hydrogen bonding propensity and/or polar surface area	ETA indices
Eta_D_psiA	eta measure of hydrogen bonding propensity	ETA indices
Eta_D_psiB	eta measure of hydrogen bonding propensity	ETA indices
Eta_D_beta	eta measure of electronic features	ETA indices
Eta_D_beta_A	eta average measure of electronic features	ETA indices
SpMax_EA	leading eigenvalue from edge adjacency mat.	Edge adjacency indices
SpMaxA_EA	normalized leading eigenvalue from edge adjacency mat.	Edge adjacency indices
SpDiam_EA	spectral diameter from edge adjacency mat.	Edge adjacency indices
SpAD_EA	spectral absolute deviation from edge adjacency mat.	Edge adjacency indices
SpMAD_EA	spectral mean absolute deviation from edge adjacency mat.	Edge adjacency indices
SpMax_EA(ed)	leading eigenvalue from edge adjacency mat. weighted by edge degree	Edge adjacency indices
SpMaxA_EA(ed)	normalized leading eigenvalue from edge adjacency mat. weighted by edge degree	Edge adjacency indices
SpDiam_EA(ed)	spectral diameter from edge adjacency mat. weighted by edge degree	Edge adjacency indices
SpAD_EA(ed)	spectral absolute deviation from edge adjacency mat. weighted by edge degree	Edge adjacency indices
SpMAD_EA(ed)	spectral mean absolute deviation from edge adjacency mat. weighted by edge degree	Edge adjacency indices
SpMax_EA(bo)	leading eigenvalue from edge adjacency mat. weighted by bond order	Edge adjacency indices
SpMaxA_EA(bo)	normalized leading eigenvalue from edge adjacency mat. weighted by bond order	Edge adjacency indices
SpDiam_EA(bo)	spectral diameter from edge adjacency mat. weighted by bond order	Edge adjacency indices
SpAD_EA(bo)	spectral absolute deviation from edge adjacency mat. weighted by bond order	Edge adjacency indices
SpMAD_EA(bo)	spectral mean absolute deviation from edge adjacency mat. weighted by bond order	Edge adjacency indices
SpMax_EA(dm)	leading eigenvalue from edge adjacency mat. weighted by dipole moment	Edge adjacency indices
SpMaxA_EA(dm)	normalized leading eigenvalue from edge adjacency mat. weighted by dipole moment	Edge adjacency indices
SpDiam_EA(dm)	spectral diameter from edge adjacency mat. weighted by dipole moment	Edge adjacency indices
SpAD_EA(dm)	spectral absolute deviation from edge adjacency mat. weighted by dipole moment	Edge adjacency indices
SpMAD_EA(dm)	spectral mean absolute deviation from edge adjacency mat. weighted by dipole moment	Edge adjacency indices
SpMax_EA(ri)	leading eigenvalue from edge adjacency mat. weighted by resonance integral	Edge adjacency indices
SpMaxA_EA(ri)	normalized leading eigenvalue from edge adjacency mat. weighted by resonance integral	Edge adjacency indices
SpDiam_EA(ri)	spectral diameter from edge adjacency mat. weighted by resonance integral	Edge adjacency indices
SpAD_EA(ri)	spectral absolute deviation from edge adjacency mat. weighted by resonance integral	Edge adjacency indices
SpMAD_EA(ri)	spectral mean absolute deviation from edge adjacency mat. weighted by resonance integral	Edge adjacency indices
SpMax_AEA(ed)	leading eigenvalue from augmented edge adjacency mat. weighted by edge degree	Edge adjacency indices
SpMaxA_AEA(ed)	normalized leading eigenvalue from augmented edge adjacency mat. weighted by edge degree	Edge adjacency indices
SpDiam_AEA(ed)	spectral diameter from augmented edge adjacency mat. weighted by edge degree	Edge adjacency indices
SpAD_AEA(ed)	spectral absolute deviation from augmented edge adjacency mat. weighted by edge degree	Edge adjacency indices
SpMAD_AEA(ed)	spectral mean absolute deviation from augmented edge adjacency mat. weighted by edge degree	Edge adjacency indices
SpMax_AEA(bo)	leading eigenvalue from augmented edge adjacency mat. weighted by bond order	Edge adjacency indices
SpMaxA_AEA(bo)	normalized leading eigenvalue from augmented edge adjacency mat. weighted by bond order	Edge adjacency indices
SpDiam_AEA(bo)	spectral diameter from augmented edge adjacency mat. weighted by bond order	Edge adjacency indices
SpAD_AEA(bo)	spectral absolute deviation from augmented edge adjacency mat. weighted by bond order	Edge adjacency indices
SpMAD_AEA(bo)	spectral mean absolute deviation from augmented edge adjacency mat. weighted by bond order	Edge adjacency indices
SpMax_AEA(dm)	leading eigenvalue from augmented edge adjacency mat. weighted by dipole moment	Edge adjacency indices
SpMaxA_AEA(dm)	normalized leading eigenvalue from augmented edge adjacency mat. weighted by dipole moment	Edge adjacency indices
SpDiam_AEA(dm)	spectral diameter from augmented edge adjacency mat. weighted by dipole moment	Edge adjacency indices
SpAD_AEA(dm)	spectral absolute deviation from augmented edge adjacency mat. weighted by dipole moment	Edge adjacency indices
SpMAD_AEA(dm)	spectral mean absolute deviation from augmented edge adjacency mat. weighted by dipole moment	Edge adjacency indices
SpMax_AEA(ri)	leading eigenvalue from augmented edge adjacency mat. weighted by resonance integral	Edge adjacency indices
SpMaxA_AEA(ri)	normalized leading eigenvalue from augmented edge adjacency mat. weighted by resonance integral	Edge adjacency indices
SpDiam_AEA(ri)	spectral diameter from augmented edge adjacency mat. weighted by resonance integral	Edge adjacency indices
SpAD_AEA(ri)	spectral absolute deviation from augmented edge adjacency mat. weighted by resonance integral	Edge adjacency indices
SpMAD_AEA(ri)	spectral mean absolute deviation from augmented edge adjacency mat. weighted by resonance integral	Edge adjacency indices
Chi0_EA	connectivity-like index of order 0 from edge adjacency mat.	Edge adjacency indices
Chi1_EA	connectivity-like index of order 1 from edge adjacency mat.	Edge adjacency indices
Chi0_EA(ed)	connectivity-like index of order 0 from edge adjacency mat. weighted by edge degree	Edge adjacency indices
Chi1_EA(ed)	connectivity-like index of order 1 from edge adjacency mat. weighted by edge degree	Edge adjacency indices
Chi0_EA(bo)	connectivity-like index of order 0 from edge adjacency mat. weighted by bond order	Edge adjacency indices
Chi1_EA(bo)	connectivity-like index of order 1 from edge adjacency mat. weighted by bond order	Edge adjacency indices
Chi0_EA(dm)	connectivity-like index of order 0 from edge adjacency mat. weighted by dipole moment	Edge adjacency indices
Chi1_EA(dm)	connectivity-like index of order 1 from edge adjacency mat. weighted by dipole moment	Edge adjacency indices
Chi0_EA(ri)	connectivity-like index of order 0 from edge adjacency mat. weighted by resonance integral	Edge adjacency indices
Chi1_EA(ri)	connectivity-like index of order 1 from edge adjacency mat. weighted by resonance integral	Edge adjacency indices
Chi0_AEA(ed)	connectivity-like index of order 0 from augmented edge adjacency mat. weighted by edge degree	Edge adjacency indices
Chi1_AEA(ed)	connectivity-like index of order 1 from augmented edge adjacency mat. weighted by edge degree	Edge adjacency indices
Chi0_AEA(bo)	connectivity-like index of order 0 from augmented edge adjacency mat. weighted by bond order	Edge adjacency indices
Chi1_AEA(bo)	connectivity-like index of order 1 from augmented edge adjacency mat. weighted by bond order	Edge adjacency indices
Chi0_AEA(dm)	connectivity-like index of order 0 from augmented edge adjacency mat. weighted by dipole moment	Edge adjacency indices
Chi1_AEA(dm)	connectivity-like index of order 1 from augmented edge adjacency mat. weighted by dipole moment	Edge adjacency indices
Chi0_AEA(ri)	connectivity-like index of order 0 from augmented edge adjacency mat. weighted by resonance integral	Edge adjacency indices
Chi1_AEA(ri)	connectivity-like index of order 1 from augmented edge adjacency mat. weighted by resonance integral	Edge adjacency indices
SM02_EA	spectral moment of order 2 from edge adjacency mat.	Edge adjacency indices
SM03_EA	spectral moment of order 3 from edge adjacency mat.	Edge adjacency indices
SM04_EA	spectral moment of order 4 from edge adjacency mat.	Edge adjacency indices
SM05_EA	spectral moment of order 5 from edge adjacency mat.	Edge adjacency indices
SM06_EA	spectral moment of order 6 from edge adjacency mat.	Edge adjacency indices
SM07_EA	spectral moment of order 7 from edge adjacency mat.	Edge adjacency indices
SM08_EA	spectral moment of order 8 from edge adjacency mat.	Edge adjacency indices
SM09_EA	spectral moment of order 9 from edge adjacency mat.	Edge adjacency indices
SM10_EA	spectral moment of order 10 from edge adjacency mat.	Edge adjacency indices
SM11_EA	spectral moment of order 11 from edge adjacency mat.	Edge adjacency indices
SM12_EA	spectral moment of order 12 from edge adjacency mat.	Edge adjacency indices
SM13_EA	spectral moment of order 13 from edge adjacency mat.	Edge adjacency indices
SM14_EA	spectral moment of order 14 from edge adjacency mat.	Edge adjacency indices
SM15_EA	spectral moment of order 15 from edge adjacency mat.	Edge adjacency indices
SM02_EA(ed)	spectral moment of order 2 from edge adjacency mat. weighted by edge degree	Edge adjacency indices
SM03_EA(ed)	spectral moment of order 3 from edge adjacency mat. weighted by edge degree	Edge adjacency indices
SM04_EA(ed)	spectral moment of order 4 from edge adjacency mat. weighted by edge degree	Edge adjacency indices
SM05_EA(ed)	spectral moment of order 5 from edge adjacency mat. weighted by edge degree	Edge adjacency indices
SM06_EA(ed)	spectral moment of order 6 from edge adjacency mat. weighted by edge degree	Edge adjacency indices
SM07_EA(ed)	spectral moment of order 7 from edge adjacency mat. weighted by edge degree	Edge adjacency indices
SM08_EA(ed)	spectral moment of order 8 from edge adjacency mat. weighted by edge degree	Edge adjacency indices
SM09_EA(ed)	spectral moment of order 9 from edge adjacency mat. weighted by edge degree	Edge adjacency indices
SM10_EA(ed)	spectral moment of order 10 from edge adjacency mat. weighted by edge degree	Edge adjacency indices
SM11_EA(ed)	spectral moment of order 11 from edge adjacency mat. weighted by edge degree	Edge adjacency indices
SM12_EA(ed)	spectral moment of order 12 from edge adjacency mat. weighted by edge degree	Edge adjacency indices
SM13_EA(ed)	spectral moment of order 13 from edge adjacency mat. weighted by edge degree	Edge adjacency indices
SM14_EA(ed)	spectral moment of order 14 from edge adjacency mat. weighted by edge degree	Edge adjacency indices
SM15_EA(ed)	spectral moment of order 15 from edge adjacency mat. weighted by edge degree	Edge adjacency indices
SM02_EA(bo)	spectral moment of order 2 from edge adjacency mat. weighted by bond order	Edge adjacency indices
SM03_EA(bo)	spectral moment of order 3 from edge adjacency mat. weighted by bond order	Edge adjacency indices
SM04_EA(bo)	spectral moment of order 4 from edge adjacency mat. weighted by bond order	Edge adjacency indices
SM05_EA(bo)	spectral moment of order 5 from edge adjacency mat. weighted by bond order	Edge adjacency indices
SM06_EA(bo)	spectral moment of order 6 from edge adjacency mat. weighted by bond order	Edge adjacency indices
SM07_EA(bo)	spectral moment of order 7 from edge adjacency mat. weighted by bond order	Edge adjacency indices
SM08_EA(bo)	spectral moment of order 8 from edge adjacency mat. weighted by bond order	Edge adjacency indices
SM09_EA(bo)	spectral moment of order 9 from edge adjacency mat. weighted by bond order	Edge adjacency indices
SM10_EA(bo)	spectral moment of order 10 from edge adjacency mat. weighted by bond order	Edge adjacency indices
SM11_EA(bo)	spectral moment of order 11 from edge adjacency mat. weighted by bond order	Edge adjacency indices
SM12_EA(bo)	spectral moment of order 12 from edge adjacency mat. weighted by bond order	Edge adjacency indices
SM13_EA(bo)	spectral moment of order 13 from edge adjacency mat. weighted by bond order	Edge adjacency indices
SM14_EA(bo)	spectral moment of order 14 from edge adjacency mat. weighted by bond order	Edge adjacency indices
SM15_EA(bo)	spectral moment of order 15 from edge adjacency mat. weighted by bond order	Edge adjacency indices
SM02_EA(dm)	spectral moment of order 2 from edge adjacency mat. weighted by dipole moment	Edge adjacency indices
SM03_EA(dm)	spectral moment of order 3 from edge adjacency mat. weighted by dipole moment	Edge adjacency indices
SM04_EA(dm)	spectral moment of order 4 from edge adjacency mat. weighted by dipole moment	Edge adjacency indices
SM05_EA(dm)	spectral moment of order 5 from edge adjacency mat. weighted by dipole moment	Edge adjacency indices
SM06_EA(dm)	spectral moment of order 6 from edge adjacency mat. weighted by dipole moment	Edge adjacency indices
SM07_EA(dm)	spectral moment of order 7 from edge adjacency mat. weighted by dipole moment	Edge adjacency indices
SM08_EA(dm)	spectral moment of order 8 from edge adjacency mat. weighted by dipole moment	Edge adjacency indices
SM09_EA(dm)	spectral moment of order 9 from edge adjacency mat. weighted by dipole moment	Edge adjacency indices
SM10_EA(dm)	spectral moment of order 10 from edge adjacency mat. weighted by dipole moment	Edge adjacency indices
SM11_EA(dm)	spectral moment of order 11 from edge adjacency mat. weighted by dipole moment	Edge adjacency indices
SM12_EA(dm)	spectral moment of order 12 from edge adjacency mat. weighted by dipole moment	Edge adjacency indices
SM13_EA(dm)	spectral moment of order 13 from edge adjacency mat. weighted by dipole moment	Edge adjacency indices
SM14_EA(dm)	spectral moment of order 14 from edge adjacency mat. weighted by dipole moment	Edge adjacency indices
SM15_EA(dm)	spectral moment of order 15 from edge adjacency mat. weighted by dipole moment	Edge adjacency indices
SM02_EA(ri)	spectral moment of order 2 from edge adjacency mat. weighted by resonance integral	Edge adjacency indices
SM03_EA(ri)	spectral moment of order 3 from edge adjacency mat. weighted by resonance integral	Edge adjacency indices
SM04_EA(ri)	spectral moment of order 4 from edge adjacency mat. weighted by resonance integral	Edge adjacency indices
SM05_EA(ri)	spectral moment of order 5 from edge adjacency mat. weighted by resonance integral	Edge adjacency indices
SM06_EA(ri)	spectral moment of order 6 from edge adjacency mat. weighted by resonance integral	Edge adjacency indices
SM07_EA(ri)	spectral moment of order 7 from edge adjacency mat. weighted by resonance integral	Edge adjacency indices
SM08_EA(ri)	spectral moment of order 8 from edge adjacency mat. weighted by resonance integral	Edge adjacency indices
SM09_EA(ri)	spectral moment of order 9 from edge adjacency mat. weighted by resonance integral	Edge adjacency indices
SM10_EA(ri)	spectral moment of order 10 from edge adjacency mat. weighted by resonance integral	Edge adjacency indices
SM11_EA(ri)	spectral moment of order 11 from edge adjacency mat. weighted by resonance integral	Edge adjacency indices
SM12_EA(ri)	spectral moment of order 12 from edge adjacency mat. weighted by resonance integral	Edge adjacency indices
SM13_EA(ri)	spectral moment of order 13 from edge adjacency mat. weighted by resonance integral	Edge adjacency indices
SM14_EA(ri)	spectral moment of order 14 from edge adjacency mat. weighted by resonance integral	Edge adjacency indices
SM15_EA(ri)	spectral moment of order 15 from edge adjacency mat. weighted by resonance integral	Edge adjacency indices
SM02_AEA(ed)	spectral moment of order 2 from augmented edge adjacency mat. weighted by edge degree	Edge adjacency indices
SM03_AEA(ed)	spectral moment of order 3 from augmented edge adjacency mat. weighted by edge degree	Edge adjacency indices
SM04_AEA(ed)	spectral moment of order 4 from augmented edge adjacency mat. weighted by edge degree	Edge adjacency indices
SM05_AEA(ed)	spectral moment of order 5 from augmented edge adjacency mat. weighted by edge degree	Edge adjacency indices
SM06_AEA(ed)	spectral moment of order 6 from augmented edge adjacency mat. weighted by edge degree	Edge adjacency indices
SM07_AEA(ed)	spectral moment of order 7 from augmented edge adjacency mat. weighted by edge degree	Edge adjacency indices
SM08_AEA(ed)	spectral moment of order 8 from augmented edge adjacency mat. weighted by edge degree	Edge adjacency indices
SM09_AEA(ed)	spectral moment of order 9 from augmented edge adjacency mat. weighted by edge degree	Edge adjacency indices
SM10_AEA(ed)	spectral moment of order 10 from augmented edge adjacency mat. weighted by edge degree	Edge adjacency indices
SM11_AEA(ed)	spectral moment of order 11 from augmented edge adjacency mat. weighted by edge degree	Edge adjacency indices
SM12_AEA(ed)	spectral moment of order 12 from augmented edge adjacency mat. weighted by edge degree	Edge adjacency indices
SM13_AEA(ed)	spectral moment of order 13 from augmented edge adjacency mat. weighted by edge degree	Edge adjacency indices
SM14_AEA(ed)	spectral moment of order 14 from augmented edge adjacency mat. weighted by edge degree	Edge adjacency indices
SM15_AEA(ed)	spectral moment of order 15 from augmented edge adjacency mat. weighted by edge degree	Edge adjacency indices
SM02_AEA(bo)	spectral moment of order 2 from augmented edge adjacency mat. weighted by bond order	Edge adjacency indices
SM03_AEA(bo)	spectral moment of order 3 from augmented edge adjacency mat. weighted by bond order	Edge adjacency indices
SM04_AEA(bo)	spectral moment of order 4 from augmented edge adjacency mat. weighted by bond order	Edge adjacency indices
SM05_AEA(bo)	spectral moment of order 5 from augmented edge adjacency mat. weighted by bond order	Edge adjacency indices
SM06_AEA(bo)	spectral moment of order 6 from augmented edge adjacency mat. weighted by bond order	Edge adjacency indices
SM07_AEA(bo)	spectral moment of order 7 from augmented edge adjacency mat. weighted by bond order	Edge adjacency indices
SM08_AEA(bo)	spectral moment of order 8 from augmented edge adjacency mat. weighted by bond order	Edge adjacency indices
SM09_AEA(bo)	spectral moment of order 9 from augmented edge adjacency mat. weighted by bond order	Edge adjacency indices
SM10_AEA(bo)	spectral moment of order 10 from augmented edge adjacency mat. weighted by bond order	Edge adjacency indices
SM11_AEA(bo)	spectral moment of order 11 from augmented edge adjacency mat. weighted by bond order	Edge adjacency indices
SM12_AEA(bo)	spectral moment of order 12 from augmented edge adjacency mat. weighted by bond order	Edge adjacency indices
SM13_AEA(bo)	spectral moment of order 13 from augmented edge adjacency mat. weighted by bond order	Edge adjacency indices
SM14_AEA(bo)	spectral moment of order 14 from augmented edge adjacency mat. weighted by bond order	Edge adjacency indices
SM15_AEA(bo)	spectral moment of order 15 from augmented edge adjacency mat. weighted by bond order	Edge adjacency indices
SM02_AEA(dm)	spectral moment of order 2 from augmented edge adjacency mat. weighted by dipole moment	Edge adjacency indices
SM03_AEA(dm)	spectral moment of order 3 from augmented edge adjacency mat. weighted by dipole moment	Edge adjacency indices
SM04_AEA(dm)	spectral moment of order 4 from augmented edge adjacency mat. weighted by dipole moment	Edge adjacency indices
SM05_AEA(dm)	spectral moment of order 5 from augmented edge adjacency mat. weighted by dipole moment	Edge adjacency indices
SM06_AEA(dm)	spectral moment of order 6 from augmented edge adjacency mat. weighted by dipole moment	Edge adjacency indices
SM07_AEA(dm)	spectral moment of order 7 from augmented edge adjacency mat. weighted by dipole moment	Edge adjacency indices
SM08_AEA(dm)	spectral moment of order 8 from augmented edge adjacency mat. weighted by dipole moment	Edge adjacency indices
SM09_AEA(dm)	spectral moment of order 9 from augmented edge adjacency mat. weighted by dipole moment	Edge adjacency indices
SM10_AEA(dm)	spectral moment of order 10 from augmented edge adjacency mat. weighted by dipole moment	Edge adjacency indices
SM11_AEA(dm)	spectral moment of order 11 from augmented edge adjacency mat. weighted by dipole moment	Edge adjacency indices
SM12_AEA(dm)	spectral moment of order 12 from augmented edge adjacency mat. weighted by dipole moment	Edge adjacency indices
SM13_AEA(dm)	spectral moment of order 13 from augmented edge adjacency mat. weighted by dipole moment	Edge adjacency indices
SM14_AEA(dm)	spectral moment of order 14 from augmented edge adjacency mat. weighted by dipole moment	Edge adjacency indices
SM15_AEA(dm)	spectral moment of order 15 from augmented edge adjacency mat. weighted by dipole moment	Edge adjacency indices
SM02_AEA(ri)	spectral moment of order 2 from augmented edge adjacency mat. weighted by resonance integral	Edge adjacency indices
SM03_AEA(ri)	spectral moment of order 3 from augmented edge adjacency mat. weighted by resonance integral	Edge adjacency indices
SM04_AEA(ri)	spectral moment of order 4 from augmented edge adjacency mat. weighted by resonance integral	Edge adjacency indices
SM05_AEA(ri)	spectral moment of order 5 from augmented edge adjacency mat. weighted by resonance integral	Edge adjacency indices
SM06_AEA(ri)	spectral moment of order 6 from augmented edge adjacency mat. weighted by resonance integral	Edge adjacency indices
SM07_AEA(ri)	spectral moment of order 7 from augmented edge adjacency mat. weighted by resonance integral	Edge adjacency indices
SM08_AEA(ri)	spectral moment of order 8 from augmented edge adjacency mat. weighted by resonance integral	Edge adjacency indices
SM09_AEA(ri)	spectral moment of order 9 from augmented edge adjacency mat. weighted by resonance integral	Edge adjacency indices
SM10_AEA(ri)	spectral moment of order 10 from augmented edge adjacency mat. weighted by resonance integral	Edge adjacency indices
SM11_AEA(ri)	spectral moment of order 11 from augmented edge adjacency mat. weighted by resonance integral	Edge adjacency indices
SM12_AEA(ri)	spectral moment of order 12 from augmented edge adjacency mat. weighted by resonance integral	Edge adjacency indices
SM13_AEA(ri)	spectral moment of order 13 from augmented edge adjacency mat. weighted by resonance integral	Edge adjacency indices
SM14_AEA(ri)	spectral moment of order 14 from augmented edge adjacency mat. weighted by resonance integral	Edge adjacency indices
SM15_AEA(ri)	spectral moment of order 15 from augmented edge adjacency mat. weighted by resonance integral	Edge adjacency indices
Eig01_EA	eigenvalue n. 1 from edge adjacency mat.	Edge adjacency indices
Eig02_EA	eigenvalue n. 2 from edge adjacency mat.	Edge adjacency indices
Eig03_EA	eigenvalue n. 3 from edge adjacency mat.	Edge adjacency indices
Eig04_EA	eigenvalue n. 4 from edge adjacency mat.	Edge adjacency indices
Eig05_EA	eigenvalue n. 5 from edge adjacency mat.	Edge adjacency indices
Eig06_EA	eigenvalue n. 6 from edge adjacency mat.	Edge adjacency indices
Eig07_EA	eigenvalue n. 7 from edge adjacency mat.	Edge adjacency indices
Eig08_EA	eigenvalue n. 8 from edge adjacency mat.	Edge adjacency indices
Eig09_EA	eigenvalue n. 9 from edge adjacency mat.	Edge adjacency indices
Eig10_EA	eigenvalue n. 10 from edge adjacency mat.	Edge adjacency indices
Eig11_EA	eigenvalue n. 11 from edge adjacency mat.	Edge adjacency indices
Eig12_EA	eigenvalue n. 12 from edge adjacency mat.	Edge adjacency indices
Eig13_EA	eigenvalue n. 13 from edge adjacency mat.	Edge adjacency indices
Eig14_EA	eigenvalue n. 14 from edge adjacency mat.	Edge adjacency indices
Eig15_EA	eigenvalue n. 15 from edge adjacency mat.	Edge adjacency indices
Eig01_EA(ed)	eigenvalue n. 1 from edge adjacency mat. weighted by edge degree	Edge adjacency indices
Eig02_EA(ed)	eigenvalue n. 2 from edge adjacency mat. weighted by edge degree	Edge adjacency indices
Eig03_EA(ed)	eigenvalue n. 3 from edge adjacency mat. weighted by edge degree	Edge adjacency indices
Eig04_EA(ed)	eigenvalue n. 4 from edge adjacency mat. weighted by edge degree	Edge adjacency indices
Eig05_EA(ed)	eigenvalue n. 5 from edge adjacency mat. weighted by edge degree	Edge adjacency indices
Eig06_EA(ed)	eigenvalue n. 6 from edge adjacency mat. weighted by edge degree	Edge adjacency indices
Eig07_EA(ed)	eigenvalue n. 7 from edge adjacency mat. weighted by edge degree	Edge adjacency indices
Eig08_EA(ed)	eigenvalue n. 8 from edge adjacency mat. weighted by edge degree	Edge adjacency indices
Eig09_EA(ed)	eigenvalue n. 9 from edge adjacency mat. weighted by edge degree	Edge adjacency indices
Eig10_EA(ed)	eigenvalue n. 10 from edge adjacency mat. weighted by edge degree	Edge adjacency indices
Eig11_EA(ed)	eigenvalue n. 11 from edge adjacency mat. weighted by edge degree	Edge adjacency indices
Eig12_EA(ed)	eigenvalue n. 12 from edge adjacency mat. weighted by edge degree	Edge adjacency indices
Eig13_EA(ed)	eigenvalue n. 13 from edge adjacency mat. weighted by edge degree	Edge adjacency indices
Eig14_EA(ed)	eigenvalue n. 14 from edge adjacency mat. weighted by edge degree	Edge adjacency indices
Eig15_EA(ed)	eigenvalue n. 15 from edge adjacency mat. weighted by edge degree	Edge adjacency indices
Eig01_EA(bo)	eigenvalue n. 1 from edge adjacency mat. weighted by bond order	Edge adjacency indices
Eig02_EA(bo)	eigenvalue n. 2 from edge adjacency mat. weighted by bond order	Edge adjacency indices
Eig03_EA(bo)	eigenvalue n. 3 from edge adjacency mat. weighted by bond order	Edge adjacency indices
Eig04_EA(bo)	eigenvalue n. 4 from edge adjacency mat. weighted by bond order	Edge adjacency indices
Eig05_EA(bo)	eigenvalue n. 5 from edge adjacency mat. weighted by bond order	Edge adjacency indices
Eig06_EA(bo)	eigenvalue n. 6 from edge adjacency mat. weighted by bond order	Edge adjacency indices
Eig07_EA(bo)	eigenvalue n. 7 from edge adjacency mat. weighted by bond order	Edge adjacency indices
Eig08_EA(bo)	eigenvalue n. 8 from edge adjacency mat. weighted by bond order	Edge adjacency indices
Eig09_EA(bo)	eigenvalue n. 9 from edge adjacency mat. weighted by bond order	Edge adjacency indices
Eig10_EA(bo)	eigenvalue n. 10 from edge adjacency mat. weighted by bond order	Edge adjacency indices
Eig11_EA(bo)	eigenvalue n. 11 from edge adjacency mat. weighted by bond order	Edge adjacency indices
Eig12_EA(bo)	eigenvalue n. 12 from edge adjacency mat. weighted by bond order	Edge adjacency indices
Eig13_EA(bo)	eigenvalue n. 13 from edge adjacency mat. weighted by bond order	Edge adjacency indices
Eig14_EA(bo)	eigenvalue n. 14 from edge adjacency mat. weighted by bond order	Edge adjacency indices
Eig15_EA(bo)	eigenvalue n. 15 from edge adjacency mat. weighted by bond order	Edge adjacency indices
Eig01_EA(dm)	eigenvalue n. 1 from edge adjacency mat. weighted by dipole moment	Edge adjacency indices
Eig02_EA(dm)	eigenvalue n. 2 from edge adjacency mat. weighted by dipole moment	Edge adjacency indices
Eig03_EA(dm)	eigenvalue n. 3 from edge adjacency mat. weighted by dipole moment	Edge adjacency indices
Eig04_EA(dm)	eigenvalue n. 4 from edge adjacency mat. weighted by dipole moment	Edge adjacency indices
Eig05_EA(dm)	eigenvalue n. 5 from edge adjacency mat. weighted by dipole moment	Edge adjacency indices
Eig06_EA(dm)	eigenvalue n. 6 from edge adjacency mat. weighted by dipole moment	Edge adjacency indices
Eig07_EA(dm)	eigenvalue n. 7 from edge adjacency mat. weighted by dipole moment	Edge adjacency indices
Eig08_EA(dm)	eigenvalue n. 8 from edge adjacency mat. weighted by dipole moment	Edge adjacency indices
Eig09_EA(dm)	eigenvalue n. 9 from edge adjacency mat. weighted by dipole moment	Edge adjacency indices
Eig10_EA(dm)	eigenvalue n. 10 from edge adjacency mat. weighted by dipole moment	Edge adjacency indices
Eig11_EA(dm)	eigenvalue n. 11 from edge adjacency mat. weighted by dipole moment	Edge adjacency indices
Eig12_EA(dm)	eigenvalue n. 12 from edge adjacency mat. weighted by dipole moment	Edge adjacency indices
Eig13_EA(dm)	eigenvalue n. 13 from edge adjacency mat. weighted by dipole moment	Edge adjacency indices
Eig14_EA(dm)	eigenvalue n. 14 from edge adjacency mat. weighted by dipole moment	Edge adjacency indices
Eig15_EA(dm)	eigenvalue n. 15 from edge adjacency mat. weighted by dipole moment	Edge adjacency indices
Eig01_EA(ri)	eigenvalue n. 1 from edge adjacency mat. weighted by resonance integral	Edge adjacency indices
Eig02_EA(ri)	eigenvalue n. 2 from edge adjacency mat. weighted by resonance integral	Edge adjacency indices
Eig03_EA(ri)	eigenvalue n. 3 from edge adjacency mat. weighted by resonance integral	Edge adjacency indices
Eig04_EA(ri)	eigenvalue n. 4 from edge adjacency mat. weighted by resonance integral	Edge adjacency indices
Eig05_EA(ri)	eigenvalue n. 5 from edge adjacency mat. weighted by resonance integral	Edge adjacency indices
Eig06_EA(ri)	eigenvalue n. 6 from edge adjacency mat. weighted by resonance integral	Edge adjacency indices
Eig07_EA(ri)	eigenvalue n. 7 from edge adjacency mat. weighted by resonance integral	Edge adjacency indices
Eig08_EA(ri)	eigenvalue n. 8 from edge adjacency mat. weighted by resonance integral	Edge adjacency indices
Eig09_EA(ri)	eigenvalue n. 9 from edge adjacency mat. weighted by resonance integral	Edge adjacency indices
Eig10_EA(ri)	eigenvalue n. 10 from edge adjacency mat. weighted by resonance integral	Edge adjacency indices
Eig11_EA(ri)	eigenvalue n. 11 from edge adjacency mat. weighted by resonance integral	Edge adjacency indices
Eig12_EA(ri)	eigenvalue n. 12 from edge adjacency mat. weighted by resonance integral	Edge adjacency indices
Eig13_EA(ri)	eigenvalue n. 13 from edge adjacency mat. weighted by resonance integral	Edge adjacency indices
Eig14_EA(ri)	eigenvalue n. 14 from edge adjacency mat. weighted by resonance integral	Edge adjacency indices
Eig15_EA(ri)	eigenvalue n. 15 from edge adjacency mat. weighted by resonance integral	Edge adjacency indices
Eig01_AEA(ed)	eigenvalue n. 1 from augmented edge adjacency mat. weighted by edge degree	Edge adjacency indices
Eig02_AEA(ed)	eigenvalue n. 2 from augmented edge adjacency mat. weighted by edge degree	Edge adjacency indices
Eig03_AEA(ed)	eigenvalue n. 3 from augmented edge adjacency mat. weighted by edge degree	Edge adjacency indices
Eig04_AEA(ed)	eigenvalue n. 4 from augmented edge adjacency mat. weighted by edge degree	Edge adjacency indices
Eig05_AEA(ed)	eigenvalue n. 5 from augmented edge adjacency mat. weighted by edge degree	Edge adjacency indices
Eig06_AEA(ed)	eigenvalue n. 6 from augmented edge adjacency mat. weighted by edge degree	Edge adjacency indices
Eig07_AEA(ed)	eigenvalue n. 7 from augmented edge adjacency mat. weighted by edge degree	Edge adjacency indices
Eig08_AEA(ed)	eigenvalue n. 8 from augmented edge adjacency mat. weighted by edge degree	Edge adjacency indices
Eig09_AEA(ed)	eigenvalue n. 9 from augmented edge adjacency mat. weighted by edge degree	Edge adjacency indices
Eig10_AEA(ed)	eigenvalue n. 10 from augmented edge adjacency mat. weighted by edge degree	Edge adjacency indices
Eig11_AEA(ed)	eigenvalue n. 11 from augmented edge adjacency mat. weighted by edge degree	Edge adjacency indices
Eig12_AEA(ed)	eigenvalue n. 12 from augmented edge adjacency mat. weighted by edge degree	Edge adjacency indices
Eig13_AEA(ed)	eigenvalue n. 13 from augmented edge adjacency mat. weighted by edge degree	Edge adjacency indices
Eig14_AEA(ed)	eigenvalue n. 14 from augmented edge adjacency mat. weighted by edge degree	Edge adjacency indices
Eig15_AEA(ed)	eigenvalue n. 15 from augmented edge adjacency mat. weighted by edge degree	Edge adjacency indices
Eig01_AEA(bo)	eigenvalue n. 1 from augmented edge adjacency mat. weighted by bond order	Edge adjacency indices
Eig02_AEA(bo)	eigenvalue n. 2 from augmented edge adjacency mat. weighted by bond order	Edge adjacency indices
Eig03_AEA(bo)	eigenvalue n. 3 from augmented edge adjacency mat. weighted by bond order	Edge adjacency indices
Eig04_AEA(bo)	eigenvalue n. 4 from augmented edge adjacency mat. weighted by bond order	Edge adjacency indices
Eig05_AEA(bo)	eigenvalue n. 5 from augmented edge adjacency mat. weighted by bond order	Edge adjacency indices
Eig06_AEA(bo)	eigenvalue n. 6 from augmented edge adjacency mat. weighted by bond order	Edge adjacency indices
Eig07_AEA(bo)	eigenvalue n. 7 from augmented edge adjacency mat. weighted by bond order	Edge adjacency indices
Eig08_AEA(bo)	eigenvalue n. 8 from augmented edge adjacency mat. weighted by bond order	Edge adjacency indices
Eig09_AEA(bo)	eigenvalue n. 9 from augmented edge adjacency mat. weighted by bond order	Edge adjacency indices
Eig10_AEA(bo)	eigenvalue n. 10 from augmented edge adjacency mat. weighted by bond order	Edge adjacency indices
Eig11_AEA(bo)	eigenvalue n. 11 from augmented edge adjacency mat. weighted by bond order	Edge adjacency indices
Eig12_AEA(bo)	eigenvalue n. 12 from augmented edge adjacency mat. weighted by bond order	Edge adjacency indices
Eig13_AEA(bo)	eigenvalue n. 13 from augmented edge adjacency mat. weighted by bond order	Edge adjacency indices
Eig14_AEA(bo)	eigenvalue n. 14 from augmented edge adjacency mat. weighted by bond order	Edge adjacency indices
Eig15_AEA(bo)	eigenvalue n. 15 from augmented edge adjacency mat. weighted by bond order	Edge adjacency indices
Eig01_AEA(dm)	eigenvalue n. 1 from augmented edge adjacency mat. weighted by dipole moment	Edge adjacency indices
Eig02_AEA(dm)	eigenvalue n. 2 from augmented edge adjacency mat. weighted by dipole moment	Edge adjacency indices
Eig03_AEA(dm)	eigenvalue n. 3 from augmented edge adjacency mat. weighted by dipole moment	Edge adjacency indices
Eig04_AEA(dm)	eigenvalue n. 4 from augmented edge adjacency mat. weighted by dipole moment	Edge adjacency indices
Eig05_AEA(dm)	eigenvalue n. 5 from augmented edge adjacency mat. weighted by dipole moment	Edge adjacency indices
Eig06_AEA(dm)	eigenvalue n. 6 from augmented edge adjacency mat. weighted by dipole moment	Edge adjacency indices
Eig07_AEA(dm)	eigenvalue n. 7 from augmented edge adjacency mat. weighted by dipole moment	Edge adjacency indices
Eig08_AEA(dm)	eigenvalue n. 8 from augmented edge adjacency mat. weighted by dipole moment	Edge adjacency indices
Eig09_AEA(dm)	eigenvalue n. 9 from augmented edge adjacency mat. weighted by dipole moment	Edge adjacency indices
Eig10_AEA(dm)	eigenvalue n. 10 from augmented edge adjacency mat. weighted by dipole moment	Edge adjacency indices
Eig11_AEA(dm)	eigenvalue n. 11 from augmented edge adjacency mat. weighted by dipole moment	Edge adjacency indices
Eig12_AEA(dm)	eigenvalue n. 12 from augmented edge adjacency mat. weighted by dipole moment	Edge adjacency indices
Eig13_AEA(dm)	eigenvalue n. 13 from augmented edge adjacency mat. weighted by dipole moment	Edge adjacency indices
Eig14_AEA(dm)	eigenvalue n. 14 from augmented edge adjacency mat. weighted by dipole moment	Edge adjacency indices
Eig15_AEA(dm)	eigenvalue n. 15 from augmented edge adjacency mat. weighted by dipole moment	Edge adjacency indices
Eig01_AEA(ri)	eigenvalue n. 1 from augmented edge adjacency mat. weighted by resonance integral	Edge adjacency indices
Eig02_AEA(ri)	eigenvalue n. 2 from augmented edge adjacency mat. weighted by resonance integral	Edge adjacency indices
Eig03_AEA(ri)	eigenvalue n. 3 from augmented edge adjacency mat. weighted by resonance integral	Edge adjacency indices
Eig04_AEA(ri)	eigenvalue n. 4 from augmented edge adjacency mat. weighted by resonance integral	Edge adjacency indices
Eig05_AEA(ri)	eigenvalue n. 5 from augmented edge adjacency mat. weighted by resonance integral	Edge adjacency indices
Eig06_AEA(ri)	eigenvalue n. 6 from augmented edge adjacency mat. weighted by resonance integral	Edge adjacency indices
Eig07_AEA(ri)	eigenvalue n. 7 from augmented edge adjacency mat. weighted by resonance integral	Edge adjacency indices
Eig08_AEA(ri)	eigenvalue n. 8 from augmented edge adjacency mat. weighted by resonance integral	Edge adjacency indices
Eig09_AEA(ri)	eigenvalue n. 9 from augmented edge adjacency mat. weighted by resonance integral	Edge adjacency indices
Eig10_AEA(ri)	eigenvalue n. 10 from augmented edge adjacency mat. weighted by resonance integral	Edge adjacency indices
Eig11_AEA(ri)	eigenvalue n. 11 from augmented edge adjacency mat. weighted by resonance integral	Edge adjacency indices
Eig12_AEA(ri)	eigenvalue n. 12 from augmented edge adjacency mat. weighted by resonance integral	Edge adjacency indices
Eig13_AEA(ri)	eigenvalue n. 13 from augmented edge adjacency mat. weighted by resonance integral	Edge adjacency indices
Eig14_AEA(ri)	eigenvalue n. 14 from augmented edge adjacency mat. weighted by resonance integral	Edge adjacency indices
Eig15_AEA(ri)	eigenvalue n. 15 from augmented edge adjacency mat. weighted by resonance integral	Edge adjacency indices
G1	gravitational index G1	Geometrical descriptors
G2	gravitational index G2 (bond-restricted)	Geometrical descriptors
RGyr	radius of gyration (mass weighted)	Geometrical descriptors
SPAN	span R	Geometrical descriptors
SPAM	average span R	Geometrical descriptors
MEcc	molecular eccentricity	Geometrical descriptors
SPH	spherosity	Geometrical descriptors
ASP	asphericity	Geometrical descriptors
PJI3	3D Petitjean shape index	Geometrical descriptors
L/Bw	length-to-breadth ratio by WHIM	Geometrical descriptors
HOMA	Harmonic Oscillator Model of Aromaticity index	Geometrical descriptors
CMBL	conjugated maximum bond length	Geometrical descriptors
AROM	aromaticity index	Geometrical descriptors
HOMT	HOMA total	Geometrical descriptors
DISPm	displacement value / weighted by mass	Geometrical descriptors
QXXm	quadrupole x-component value / weighted by mass	Geometrical descriptors
QYYm	quadrupole y-component value / weighted by mass	Geometrical descriptors
QZZm	quadrupole z-component value / weighted by mass	Geometrical descriptors
DISPv	displacement value / weighted by van der Waals volume	Geometrical descriptors
QXXv	quadrupole x-component value / weighted by van der Waals volume	Geometrical descriptors
QYYv	quadrupole y-component value / weighted by van der Waals volume	Geometrical descriptors
QZZv	quadrupole z-component value / weighted by van der Waals volume	Geometrical descriptors
DISPe	displacement value / weighted by Sanderson electronegativity	Geometrical descriptors
QXXe	quadrupole x-component value / weighted by Sanderson electronegativity	Geometrical descriptors
QYYe	quadrupole y-component value / weighted by Sanderson electronegativity	Geometrical descriptors
QZZe	quadrupole z-component value / weighted by Sanderson electronegativity	Geometrical descriptors
DISPp	displacement value / weighted by polarizability	Geometrical descriptors
QXXp	quadrupole x-component value / weighted by polarizability	Geometrical descriptors
QYYp	quadrupole y-component value / weighted by polarizability	Geometrical descriptors
QZZp	quadrupole z-component value / weighted by polarizability	Geometrical descriptors
DISPi	displacement value / weighted by ionization potential	Geometrical descriptors
QXXi	quadrupole x-component value / weighted by ionization potential	Geometrical descriptors
QYYi	quadrupole y-component value / weighted by ionization potential	Geometrical descriptors
QZZi	quadrupole z-component value / weighted by ionization potential	Geometrical descriptors
DISPs	displacement value / weighted by I-state	Geometrical descriptors
QXXs	quadrupole x-component value / weighted by I-state	Geometrical descriptors
QYYs	quadrupole y-component value / weighted by I-state	Geometrical descriptors
QZZs	quadrupole z-component value / weighted by I-state	Geometrical descriptors
Wi_G	Wiener-like index from geometrical matrix	3D matrix-based descriptors
WiA_G	average Wiener-like index from geometrical matrix	3D matrix-based descriptors
AVS_G	average vertex sum from geometrical matrix	3D matrix-based descriptors
H_G	Harary-like index from geometrical matrix	3D matrix-based descriptors
Chi_G	Randic-like index from geometrical matrix	3D matrix-based descriptors
ChiA_G	average Randic-like index from geometrical matrix	3D matrix-based descriptors
J_G	Balaban-like index from geometrical matrix	3D matrix-based descriptors
HyWi_G	hyper-Wiener-like index from geometrical matrix	3D matrix-based descriptors
SpAbs_G	graph energy from geometrical matrix	3D matrix-based descriptors
SpPos_G	spectral positive sum from geometrical matrix	3D matrix-based descriptors
SpPosA_G	normalized spectral positive sum from geometrical matrix	3D matrix-based descriptors
SpPosLog_G	logarithmic spectral positive sum from geometrical matrix	3D matrix-based descriptors
SpMax_G	leading eigenvalue from geometrical matrix	3D matrix-based descriptors
SpMaxA_G	normalized leading eigenvalue from geometrical matrix	3D matrix-based descriptors
SpDiam_G	spectral diameter from geometrical matrix	3D matrix-based descriptors
SpAD_G	spectral absolute deviation from geometrical matrix	3D matrix-based descriptors
SpMAD_G	spectral mean absolute deviation from geometrical matrix	3D matrix-based descriptors
Ho_G	Hosoya-like index (log function) from geometrical matrix	3D matrix-based descriptors
EE_G	Estrada-like index (log function) from geometrical matrix	3D matrix-based descriptors
SM2_G	spectral moment of order 2 from geometrical matrix	3D matrix-based descriptors
SM3_G	spectral moment of order 3 from geometrical matrix	3D matrix-based descriptors
SM4_G	spectral moment of order 4 from geometrical matrix	3D matrix-based descriptors
SM5_G	spectral moment of order 5 from geometrical matrix	3D matrix-based descriptors
SM6_G	spectral moment of order 6 from geometrical matrix	3D matrix-based descriptors
VE1_G	coefficient sum of the last eigenvector (absolute values) from geometrical matrix	3D matrix-based descriptors
VE2_G	average coefficient of the last eigenvector (absolute values) from geometrical matrix	3D matrix-based descriptors
VE3_G	logarithmic coefficient sum of the last eigenvector (absolute values) from geometrical matrix	3D matrix-based descriptors
VE1sign_G	coefficient sum of the last eigenvector from geometrical matrix	3D matrix-based descriptors
VE2sign_G	average coefficient of the last eigenvector from geometrical matrix	3D matrix-based descriptors
VE3sign_G	logarithmic coefficient sum of the last eigenvector from geometrical matrix	3D matrix-based descriptors
VR1_G	Randic-like eigenvector-based index from geometrical matrix	3D matrix-based descriptors
VR2_G	normalized Randic-like eigenvector-based index from geometrical matrix	3D matrix-based descriptors
VR3_G	logarithmic Randic-like eigenvector-based index from geometrical matrix	3D matrix-based descriptors
Wi_RG	Wiener-like index from reciprocal squared geometrical matrix	3D matrix-based descriptors
WiA_RG	average Wiener-like index from reciprocal squared geometrical matrix	3D matrix-based descriptors
AVS_RG	average vertex sum from reciprocal squared geometrical matrix	3D matrix-based descriptors
H_RG	Harary-like index from reciprocal squared geometrical matrix	3D matrix-based descriptors
Chi_RG	Randic-like index from reciprocal squared geometrical matrix	3D matrix-based descriptors
ChiA_RG	average Randic-like index from reciprocal squared geometrical matrix	3D matrix-based descriptors
J_RG	Balaban-like index from reciprocal squared geometrical matrix	3D matrix-based descriptors
HyWi_RG	hyper-Wiener-like index from reciprocal squared geometrical matrix	3D matrix-based descriptors
SpAbs_RG	graph energy from reciprocal squared geometrical matrix	3D matrix-based descriptors
SpPos_RG	spectral positive sum from reciprocal squared geometrical matrix	3D matrix-based descriptors
SpPosA_RG	normalized spectral positive sum from reciprocal squared geometrical matrix	3D matrix-based descriptors
SpPosLog_RG	logarithmic spectral positive sum from reciprocal squared geometrical matrix	3D matrix-based descriptors
SpMax_RG	leading eigenvalue from reciprocal squared geometrical matrix	3D matrix-based descriptors
SpMaxA_RG	normalized leading eigenvalue from reciprocal squared geometrical matrix	3D matrix-based descriptors
SpDiam_RG	spectral diameter from reciprocal squared geometrical matrix	3D matrix-based descriptors
SpAD_RG	spectral absolute deviation from reciprocal squared geometrical matrix	3D matrix-based descriptors
SpMAD_RG	spectral mean absolute deviation from reciprocal squared geometrical matrix	3D matrix-based descriptors
Ho_RG	Hosoya-like index (log function) from reciprocal squared geometrical matrix	3D matrix-based descriptors
EE_RG	Estrada-like index (log function) from reciprocal squared geometrical matrix	3D matrix-based descriptors
SM2_RG	spectral moment of order 2 from reciprocal squared geometrical matrix	3D matrix-based descriptors
SM3_RG	spectral moment of order 3 from reciprocal squared geometrical matrix	3D matrix-based descriptors
SM4_RG	spectral moment of order 4 from reciprocal squared geometrical matrix	3D matrix-based descriptors
SM5_RG	spectral moment of order 5 from reciprocal squared geometrical matrix	3D matrix-based descriptors
SM6_RG	spectral moment of order 6 from reciprocal squared geometrical matrix	3D matrix-based descriptors
VE1_RG	coefficient sum of the last eigenvector (absolute values) from reciprocal squared geometrical matrix	3D matrix-based descriptors
VE2_RG	average coefficient of the last eigenvector (absolute values) from reciprocal squared geometrical matrix	3D matrix-based descriptors
VE3_RG	logarithmic coefficient sum of the last eigenvector (absolute values) from reciprocal squared geometrical matrix	3D matrix-based descriptors
VE1sign_RG	coefficient sum of the last eigenvector from reciprocal squared geometrical matrix	3D matrix-based descriptors
VE2sign_RG	average coefficient of the last eigenvector from reciprocal squared geometrical matrix	3D matrix-based descriptors
VE3sign_RG	logarithmic coefficient sum of the last eigenvector from reciprocal squared geometrical matrix	3D matrix-based descriptors
VR1_RG	Randic-like eigenvector-based index from reciprocal squared geometrical matrix	3D matrix-based descriptors
VR2_RG	normalized Randic-like eigenvector-based index from reciprocal squared geometrical matrix	3D matrix-based descriptors
VR3_RG	logarithmic Randic-like eigenvector-based index from reciprocal squared geometrical matrix	3D matrix-based descriptors
Wi_G/D	Wiener-like index from distance/distance matrix	3D matrix-based descriptors
WiA_G/D	average Wiener-like index from distance/distance matrix	3D matrix-based descriptors
AVS_G/D	average vertex sum from distance/distance matrix	3D matrix-based descriptors
H_G/D	Harary-like index from distance/distance matrix	3D matrix-based descriptors
Chi_G/D	Randic-like index from distance/distance matrix	3D matrix-based descriptors
ChiA_G/D	average Randic-like index from distance/distance matrix	3D matrix-based descriptors
J_G/D	Balaban-like index from distance/distance matrix	3D matrix-based descriptors
HyWi_G/D	hyper-Wiener-like index from distance/distance matrix	3D matrix-based descriptors
SpAbs_G/D	graph energy from distance/distance matrix	3D matrix-based descriptors
SpPos_G/D	spectral positive sum from distance/distance matrix	3D matrix-based descriptors
SpPosA_G/D	normalized spectral positive sum from distance/distance matrix	3D matrix-based descriptors
SpPosLog_G/D	logarithmic spectral positive sum from distance/distance matrix	3D matrix-based descriptors
SpMax_G/D	leading eigenvalue from distance/distance matrix	3D matrix-based descriptors
SpMaxA_G/D	normalized leading eigenvalue from distance/distance matrix (folding degree index)	3D matrix-based descriptors
SpDiam_G/D	spectral diameter from distance/distance matrix	3D matrix-based descriptors
SpAD_G/D	spectral absolute deviation from distance/distance matrix	3D matrix-based descriptors
SpMAD_G/D	spectral mean absolute deviation from distance/distance matrix	3D matrix-based descriptors
Ho_G/D	Hosoya-like index (log function) from distance/distance matrix	3D matrix-based descriptors
EE_G/D	Estrada-like index (log function) from distance/distance matrix	3D matrix-based descriptors
SM2_G/D	spectral moment of order 2 from distance/distance matrix	3D matrix-based descriptors
SM3_G/D	spectral moment of order 3 from distance/distance matrix	3D matrix-based descriptors
SM4_G/D	spectral moment of order 4 from distance/distance matrix	3D matrix-based descriptors
SM5_G/D	spectral moment of order 5 from distance/distance matrix	3D matrix-based descriptors
SM6_G/D	spectral moment of order 6 from distance/distance matrix	3D matrix-based descriptors
VE1_G/D	coefficient sum of the last eigenvector (absolute values) from distance/distance matrix	3D matrix-based descriptors
VE2_G/D	average coefficient of the last eigenvector (absolute values) from distance/distance matrix	3D matrix-based descriptors
VE3_G/D	logarithmic coefficient sum of the last eigenvector (absolute values) from distance/distance matrix	3D matrix-based descriptors
VE1sign_G/D	coefficient sum of the last eigenvector from distance/distance matrix	3D matrix-based descriptors
VE2sign_G/D	average coefficient of the last eigenvector from distance/distance matrix	3D matrix-based descriptors
VE3sign_G/D	logarithmic coefficient sum of the last eigenvector from distance/distance matrix	3D matrix-based descriptors
VR1_G/D	Randic-like eigenvector-based index from distance/distance matrix	3D matrix-based descriptors
VR2_G/D	normalized Randic-like eigenvector-based index from distance/distance matrix	3D matrix-based descriptors
VR3_G/D	logarithmic Randic-like eigenvector-based index from distance/distance matrix	3D matrix-based descriptors
Wi_Coulomb	Wiener-like index from Coulomb matrix	3D matrix-based descriptors
WiA_Coulomb	average Wiener-like index from Coulomb matrix	3D matrix-based descriptors
AVS_Coulomb	average vertex sum from Coulomb matrix	3D matrix-based descriptors
H_Coulomb	Harary-like index from Coulomb matrix	3D matrix-based descriptors
Chi_Coulomb	Randic-like index from Coulomb matrix	3D matrix-based descriptors
ChiA_Coulomb	average Randic-like index from Coulomb matrix	3D matrix-based descriptors
J_Coulomb	Balaban-like index from Coulomb matrix	3D matrix-based descriptors
HyWi_Coulomb	hyper-Wiener-like index from Coulomb matrix	3D matrix-based descriptors
SpAbs_Coulomb	graph energy from Coulomb matrix	3D matrix-based descriptors
SpPos_Coulomb	spectral positive sum from Coulomb matrix	3D matrix-based descriptors
SpPosA_Coulomb	normalized spectral positive sum from Coulomb matrix	3D matrix-based descriptors
SpPosLog_Coulomb	logarithmic spectral positive sum from Coulomb matrix	3D matrix-based descriptors
SpMax_Coulomb	leading eigenvalue from Coulomb matrix	3D matrix-based descriptors
SpMaxA_Coulomb	normalized leading eigenvalue from Coulomb matrix	3D matrix-based descriptors
SpDiam_Coulomb	spectral diameter from Coulomb matrix	3D matrix-based descriptors
SpAD_Coulomb	spectral absolute deviation from Coulomb matrix	3D matrix-based descriptors
SpMAD_Coulomb	spectral mean absolute deviation from Coulomb matrix	3D matrix-based descriptors
Ho_Coulomb	Hosoya-like index (log function) from Coulomb matrix	3D matrix-based descriptors
EE_Coulomb	Estrada-like index (log function) from Coulomb matrix	3D matrix-based descriptors
SM2_Coulomb	spectral moment of order 2 from Coulomb matrix	3D matrix-based descriptors
SM3_Coulomb	spectral moment of order 3 from Coulomb matrix	3D matrix-based descriptors
SM4_Coulomb	spectral moment of order 4 from Coulomb matrix	3D matrix-based descriptors
SM5_Coulomb	spectral moment of order 5 from Coulomb matrix	3D matrix-based descriptors
SM6_Coulomb	spectral moment of order 6 from Coulomb matrix	3D matrix-based descriptors
VE1_Coulomb	coefficient sum of the last eigenvector (absolute values) from Coulomb matrix	3D matrix-based descriptors
VE2_Coulomb	average coefficient of the last eigenvector (absolute values) from Coulomb matrix	3D matrix-based descriptors
VE3_Coulomb	logarithmic coefficient sum of the last eigenvector (absolute values) from Coulomb matrix	3D matrix-based descriptors
VE1sign_Coulomb	coefficient sum of the last eigenvector from Coulomb matrix	3D matrix-based descriptors
VE2sign_Coulomb	average coefficient of the last eigenvector from Coulomb matrix	3D matrix-based descriptors
VE3sign_Coulomb	logarithmic coefficient sum of the last eigenvector from Coulomb matrix	3D matrix-based descriptors
VR1_Coulomb	Randic-like eigenvector-based index from Coulomb matrix	3D matrix-based descriptors
VR2_Coulomb	normalized Randic-like eigenvector-based index from Coulomb matrix	3D matrix-based descriptors
VR3_Coulomb	logarithmic Randic-like eigenvector-based index from Coulomb matrix	3D matrix-based descriptors
TDB01u	3D Topological distance based descriptors - lag 1 unweighted	3D autocorrelations
TDB02u	3D Topological distance based descriptors - lag 2 unweighted	3D autocorrelations
TDB03u	3D Topological distance based descriptors - lag 3 unweighted	3D autocorrelations
TDB04u	3D Topological distance based descriptors - lag 4 unweighted	3D autocorrelations
TDB05u	3D Topological distance based descriptors - lag 5 unweighted	3D autocorrelations
TDB06u	3D Topological distance based descriptors - lag 6 unweighted	3D autocorrelations
TDB07u	3D Topological distance based descriptors - lag 7 unweighted	3D autocorrelations
TDB08u	3D Topological distance based descriptors - lag 8 unweighted	3D autocorrelations
TDB09u	3D Topological distance based descriptors - lag 9 unweighted	3D autocorrelations
TDB10u	3D Topological distance based descriptors - lag 10 unweighted	3D autocorrelations
TDB01m	3D Topological distance based descriptors - lag 1 weighted by mass	3D autocorrelations
TDB02m	3D Topological distance based descriptors - lag 2 weighted by mass	3D autocorrelations
TDB03m	3D Topological distance based descriptors - lag 3 weighted by mass	3D autocorrelations
TDB04m	3D Topological distance based descriptors - lag 4 weighted by mass	3D autocorrelations
TDB05m	3D Topological distance based descriptors - lag 5 weighted by mass	3D autocorrelations
TDB06m	3D Topological distance based descriptors - lag 6 weighted by mass	3D autocorrelations
TDB07m	3D Topological distance based descriptors - lag 7 weighted by mass	3D autocorrelations
TDB08m	3D Topological distance based descriptors - lag 8 weighted by mass	3D autocorrelations
TDB09m	3D Topological distance based descriptors - lag 9 weighted by mass	3D autocorrelations
TDB10m	3D Topological distance based descriptors - lag 10 weighted by mass	3D autocorrelations
TDB01v	3D Topological distance based descriptors - lag 1 weighted by van der Waals volume	3D autocorrelations
TDB02v	3D Topological distance based descriptors - lag 2 weighted by van der Waals volume	3D autocorrelations
TDB03v	3D Topological distance based descriptors - lag 3 weighted by van der Waals volume	3D autocorrelations
TDB04v	3D Topological distance based descriptors - lag 4 weighted by van der Waals volume	3D autocorrelations
TDB05v	3D Topological distance based descriptors - lag 5 weighted by van der Waals volume	3D autocorrelations
TDB06v	3D Topological distance based descriptors - lag 6 weighted by van der Waals volume	3D autocorrelations
TDB07v	3D Topological distance based descriptors - lag 7 weighted by van der Waals volume	3D autocorrelations
TDB08v	3D Topological distance based descriptors - lag 8 weighted by van der Waals volume	3D autocorrelations
TDB09v	3D Topological distance based descriptors - lag 9 weighted by van der Waals volume	3D autocorrelations
TDB10v	3D Topological distance based descriptors - lag 10 weighted by van der Waals volume	3D autocorrelations
TDB01e	3D Topological distance based descriptors - lag 1 weighted by Sanderson electronegativity	3D autocorrelations
TDB02e	3D Topological distance based descriptors - lag 2 weighted by Sanderson electronegativity	3D autocorrelations
TDB03e	3D Topological distance based descriptors - lag 3 weighted by Sanderson electronegativity	3D autocorrelations
TDB04e	3D Topological distance based descriptors - lag 4 weighted by Sanderson electronegativity	3D autocorrelations
TDB05e	3D Topological distance based descriptors - lag 5 weighted by Sanderson electronegativity	3D autocorrelations
TDB06e	3D Topological distance based descriptors - lag 6 weighted by Sanderson electronegativity	3D autocorrelations
TDB07e	3D Topological distance based descriptors - lag 7 weighted by Sanderson electronegativity	3D autocorrelations
TDB08e	3D Topological distance based descriptors - lag 8 weighted by Sanderson electronegativity	3D autocorrelations
TDB09e	3D Topological distance based descriptors - lag 9 weighted by Sanderson electronegativity	3D autocorrelations
TDB10e	3D Topological distance based descriptors - lag 10 weighted by Sanderson electronegativity	3D autocorrelations
TDB01p	3D Topological distance based descriptors - lag 1 weighted by polarizability	3D autocorrelations
TDB02p	3D Topological distance based descriptors - lag 2 weighted by polarizability	3D autocorrelations
TDB03p	3D Topological distance based descriptors - lag 3 weighted by polarizability	3D autocorrelations
TDB04p	3D Topological distance based descriptors - lag 4 weighted by polarizability	3D autocorrelations
TDB05p	3D Topological distance based descriptors - lag 5 weighted by polarizability	3D autocorrelations
TDB06p	3D Topological distance based descriptors - lag 6 weighted by polarizability	3D autocorrelations
TDB07p	3D Topological distance based descriptors - lag 7 weighted by polarizability	3D autocorrelations
TDB08p	3D Topological distance based descriptors - lag 8 weighted by polarizability	3D autocorrelations
TDB09p	3D Topological distance based descriptors - lag 9 weighted by polarizability	3D autocorrelations
TDB10p	3D Topological distance based descriptors - lag 10 weighted by polarizability	3D autocorrelations
TDB01i	3D Topological distance based descriptors - lag 1 weighted by ionization potential	3D autocorrelations
TDB02i	3D Topological distance based descriptors - lag 2 weighted by ionization potential	3D autocorrelations
TDB03i	3D Topological distance based descriptors - lag 3 weighted by ionization potential	3D autocorrelations
TDB04i	3D Topological distance based descriptors - lag 4 weighted by ionization potential	3D autocorrelations
TDB05i	3D Topological distance based descriptors - lag 5 weighted by ionization potential	3D autocorrelations
TDB06i	3D Topological distance based descriptors - lag 6 weighted by ionization potential	3D autocorrelations
TDB07i	3D Topological distance based descriptors - lag 7 weighted by ionization potential	3D autocorrelations
TDB08i	3D Topological distance based descriptors - lag 8 weighted by ionization potential	3D autocorrelations
TDB09i	3D Topological distance based descriptors - lag 9 weighted by ionization potential	3D autocorrelations
TDB10i	3D Topological distance based descriptors - lag 10 weighted by ionization potential	3D autocorrelations
TDB01s	3D Topological distance based descriptors - lag 1 weighted by I-state	3D autocorrelations
TDB02s	3D Topological distance based descriptors - lag 2 weighted by I-state	3D autocorrelations
TDB03s	3D Topological distance based descriptors - lag 3 weighted by I-state	3D autocorrelations
TDB04s	3D Topological distance based descriptors - lag 4 weighted by I-state	3D autocorrelations
TDB05s	3D Topological distance based descriptors - lag 5 weighted by I-state	3D autocorrelations
TDB06s	3D Topological distance based descriptors - lag 6 weighted by I-state	3D autocorrelations
TDB07s	3D Topological distance based descriptors - lag 7 weighted by I-state	3D autocorrelations
TDB08s	3D Topological distance based descriptors - lag 8 weighted by I-state	3D autocorrelations
TDB09s	3D Topological distance based descriptors - lag 9 weighted by I-state	3D autocorrelations
TDB10s	3D Topological distance based descriptors - lag 10 weighted by I-state	3D autocorrelations
TDB01r	3D Topological distance based descriptors - lag 1 weighted by covalent radius	3D autocorrelations
TDB02r	3D Topological distance based descriptors - lag 2 weighted by covalent radius	3D autocorrelations
TDB03r	3D Topological distance based descriptors - lag 3 weighted by covalent radius	3D autocorrelations
TDB04r	3D Topological distance based descriptors - lag 4 weighted by covalent radius	3D autocorrelations
TDB05r	3D Topological distance based descriptors - lag 5 weighted by covalent radius	3D autocorrelations
TDB06r	3D Topological distance based descriptors - lag 6 weighted by covalent radius	3D autocorrelations
TDB07r	3D Topological distance based descriptors - lag 7 weighted by covalent radius	3D autocorrelations
TDB08r	3D Topological distance based descriptors - lag 8 weighted by covalent radius	3D autocorrelations
TDB09r	3D Topological distance based descriptors - lag 9 weighted by covalent radius	3D autocorrelations
TDB10r	3D Topological distance based descriptors - lag 10 weighted by covalent radius	3D autocorrelations
RDF010u	Radial Distribution Function - 010 / unweighted	RDF descriptors
RDF015u	Radial Distribution Function - 015 / unweighted	RDF descriptors
RDF020u	Radial Distribution Function - 020 / unweighted	RDF descriptors
RDF025u	Radial Distribution Function - 025 / unweighted	RDF descriptors
RDF030u	Radial Distribution Function - 030 / unweighted	RDF descriptors
RDF035u	Radial Distribution Function - 035 / unweighted	RDF descriptors
RDF040u	Radial Distribution Function - 040 / unweighted	RDF descriptors
RDF045u	Radial Distribution Function - 045 / unweighted	RDF descriptors
RDF050u	Radial Distribution Function - 050 / unweighted	RDF descriptors
RDF055u	Radial Distribution Function - 055 / unweighted	RDF descriptors
RDF060u	Radial Distribution Function - 060 / unweighted	RDF descriptors
RDF065u	Radial Distribution Function - 065 / unweighted	RDF descriptors
RDF070u	Radial Distribution Function - 070 / unweighted	RDF descriptors
RDF075u	Radial Distribution Function - 075 / unweighted	RDF descriptors
RDF080u	Radial Distribution Function - 080 / unweighted	RDF descriptors
RDF085u	Radial Distribution Function - 085 / unweighted	RDF descriptors
RDF090u	Radial Distribution Function - 090 / unweighted	RDF descriptors
RDF095u	Radial Distribution Function - 095 / unweighted	RDF descriptors
RDF100u	Radial Distribution Function - 100 / unweighted	RDF descriptors
RDF105u	Radial Distribution Function - 105 / unweighted	RDF descriptors
RDF110u	Radial Distribution Function - 110 / unweighted	RDF descriptors
RDF115u	Radial Distribution Function - 115 / unweighted	RDF descriptors
RDF120u	Radial Distribution Function - 120 / unweighted	RDF descriptors
RDF125u	Radial Distribution Function - 125 / unweighted	RDF descriptors
RDF130u	Radial Distribution Function - 130 / unweighted	RDF descriptors
RDF135u	Radial Distribution Function - 135 / unweighted	RDF descriptors
RDF140u	Radial Distribution Function - 140 / unweighted	RDF descriptors
RDF145u	Radial Distribution Function - 145 / unweighted	RDF descriptors
RDF150u	Radial Distribution Function - 150 / unweighted	RDF descriptors
RDF155u	Radial Distribution Function - 155 / unweighted	RDF descriptors
RDF010m	Radial Distribution Function - 010 / weighted by mass	RDF descriptors
RDF015m	Radial Distribution Function - 015 / weighted by mass	RDF descriptors
RDF020m	Radial Distribution Function - 020 / weighted by mass	RDF descriptors
RDF025m	Radial Distribution Function - 025 / weighted by mass	RDF descriptors
RDF030m	Radial Distribution Function - 030 / weighted by mass	RDF descriptors
RDF035m	Radial Distribution Function - 035 / weighted by mass	RDF descriptors
RDF040m	Radial Distribution Function - 040 / weighted by mass	RDF descriptors
RDF045m	Radial Distribution Function - 045 / weighted by mass	RDF descriptors
RDF050m	Radial Distribution Function - 050 / weighted by mass	RDF descriptors
RDF055m	Radial Distribution Function - 055 / weighted by mass	RDF descriptors
RDF060m	Radial Distribution Function - 060 / weighted by mass	RDF descriptors
RDF065m	Radial Distribution Function - 065 / weighted by mass	RDF descriptors
RDF070m	Radial Distribution Function - 070 / weighted by mass	RDF descriptors
RDF075m	Radial Distribution Function - 075 / weighted by mass	RDF descriptors
RDF080m	Radial Distribution Function - 080 / weighted by mass	RDF descriptors
RDF085m	Radial Distribution Function - 085 / weighted by mass	RDF descriptors
RDF090m	Radial Distribution Function - 090 / weighted by mass	RDF descriptors
RDF095m	Radial Distribution Function - 095 / weighted by mass	RDF descriptors
RDF100m	Radial Distribution Function - 100 / weighted by mass	RDF descriptors
RDF105m	Radial Distribution Function - 105 / weighted by mass	RDF descriptors
RDF110m	Radial Distribution Function - 110 / weighted by mass	RDF descriptors
RDF115m	Radial Distribution Function - 115 / weighted by mass	RDF descriptors
RDF120m	Radial Distribution Function - 120 / weighted by mass	RDF descriptors
RDF125m	Radial Distribution Function - 125 / weighted by mass	RDF descriptors
RDF130m	Radial Distribution Function - 130 / weighted by mass	RDF descriptors
RDF135m	Radial Distribution Function - 135 / weighted by mass	RDF descriptors
RDF140m	Radial Distribution Function - 140 / weighted by mass	RDF descriptors
RDF145m	Radial Distribution Function - 145 / weighted by mass	RDF descriptors
RDF150m	Radial Distribution Function - 150 / weighted by mass	RDF descriptors
RDF155m	Radial Distribution Function - 155 / weighted by mass	RDF descriptors
RDF010v	Radial Distribution Function - 010 / weighted by van der Waals volume	RDF descriptors
RDF015v	Radial Distribution Function - 015 / weighted by van der Waals volume	RDF descriptors
RDF020v	Radial Distribution Function - 020 / weighted by van der Waals volume	RDF descriptors
RDF025v	Radial Distribution Function - 025 / weighted by van der Waals volume	RDF descriptors
RDF030v	Radial Distribution Function - 030 / weighted by van der Waals volume	RDF descriptors
RDF035v	Radial Distribution Function - 035 / weighted by van der Waals volume	RDF descriptors
RDF040v	Radial Distribution Function - 040 / weighted by van der Waals volume	RDF descriptors
RDF045v	Radial Distribution Function - 045 / weighted by van der Waals volume	RDF descriptors
RDF050v	Radial Distribution Function - 050 / weighted by van der Waals volume	RDF descriptors
RDF055v	Radial Distribution Function - 055 / weighted by van der Waals volume	RDF descriptors
RDF060v	Radial Distribution Function - 060 / weighted by van der Waals volume	RDF descriptors
RDF065v	Radial Distribution Function - 065 / weighted by van der Waals volume	RDF descriptors
RDF070v	Radial Distribution Function - 070 / weighted by van der Waals volume	RDF descriptors
RDF075v	Radial Distribution Function - 075 / weighted by van der Waals volume	RDF descriptors
RDF080v	Radial Distribution Function - 080 / weighted by van der Waals volume	RDF descriptors
RDF085v	Radial Distribution Function - 085 / weighted by van der Waals volume	RDF descriptors
RDF090v	Radial Distribution Function - 090 / weighted by van der Waals volume	RDF descriptors
RDF095v	Radial Distribution Function - 095 / weighted by van der Waals volume	RDF descriptors
RDF100v	Radial Distribution Function - 100 / weighted by van der Waals volume	RDF descriptors
RDF105v	Radial Distribution Function - 105 / weighted by van der Waals volume	RDF descriptors
RDF110v	Radial Distribution Function - 110 / weighted by van der Waals volume	RDF descriptors
RDF115v	Radial Distribution Function - 115 / weighted by van der Waals volume	RDF descriptors
RDF120v	Radial Distribution Function - 120 / weighted by van der Waals volume	RDF descriptors
RDF125v	Radial Distribution Function - 125 / weighted by van der Waals volume	RDF descriptors
RDF130v	Radial Distribution Function - 130 / weighted by van der Waals volume	RDF descriptors
RDF135v	Radial Distribution Function - 135 / weighted by van der Waals volume	RDF descriptors
RDF140v	Radial Distribution Function - 140 / weighted by van der Waals volume	RDF descriptors
RDF145v	Radial Distribution Function - 145 / weighted by van der Waals volume	RDF descriptors
RDF150v	Radial Distribution Function - 150 / weighted by van der Waals volume	RDF descriptors
RDF155v	Radial Distribution Function - 155 / weighted by van der Waals volume	RDF descriptors
RDF010e	Radial Distribution Function - 010 / weighted by Sanderson electronegativity	RDF descriptors
RDF015e	Radial Distribution Function - 015 / weighted by Sanderson electronegativity	RDF descriptors
RDF020e	Radial Distribution Function - 020 / weighted by Sanderson electronegativity	RDF descriptors
RDF025e	Radial Distribution Function - 025 / weighted by Sanderson electronegativity	RDF descriptors
RDF030e	Radial Distribution Function - 030 / weighted by Sanderson electronegativity	RDF descriptors
RDF035e	Radial Distribution Function - 035 / weighted by Sanderson electronegativity	RDF descriptors
RDF040e	Radial Distribution Function - 040 / weighted by Sanderson electronegativity	RDF descriptors
RDF045e	Radial Distribution Function - 045 / weighted by Sanderson electronegativity	RDF descriptors
RDF050e	Radial Distribution Function - 050 / weighted by Sanderson electronegativity	RDF descriptors
RDF055e	Radial Distribution Function - 055 / weighted by Sanderson electronegativity	RDF descriptors
[truncated: 3,669 more rows]
