# Supplementary material for: Development of Machine Learning Models for Precise Prediction of Bioactive Supramolecular Nucleoside Hydrogels
Source: Research Square preprint supplement (doi:10.21203/rs.3.rs-6888838/v1), 2025-07-10
Supplement: Supplementary file 7 [file 7d97d2feda295fe7193eccd6.xlsx]

## Sheet: Total
Supplementary Data 10. The result of the Composite Molecular Attribute Score
cid	CMAS_Nontox	CMAS_Anti-P. gingivalis	CMAS_Hydrogel	CMAS_Score	CMAS_Rank
3011932	0.947661	0.846526	1	0.908859	1
53940462	0.959703	0.865108	0.876374	0.892852	2
53657227	0.976348	0.868486	0.853518	0.887283	3
161605	0.934715	0.830124	0.918206	0.886026	4
483942	0.944843	0.894328	0.828125	0.88057	5
136260091	0.915101	0.894825	0.836421	0.878129	6
135509071	0.889788	0.932435	0.827102	0.876448	7
54089955	0.880647	0.975783	0.816569	0.875436	8
124396689	0.927825	0.876288	0.83068	0.872875	9
483932	0.890021	0.904964	0.827102	0.87025	10
136190394	0.927409	0.809653	0.896568	0.869552	11
6450917	0.91692	0.948791	0.78248	0.86549	12
54235934	0.966012	0.888792	0.791131	0.865069	13
515211	0.950066	0.966826	0.762776	0.86407	14
5273982	0.874361	0.959322	0.794793	0.861821	15
5273979	0.918279	0.905988	0.789408	0.860746	16
454121	0.82538	0.968475	0.828958	0.860374	17
483920	0.939076	0.779132	0.905634	0.859797	18
3011931	0.962143	0.896721	0.772867	0.858051	19
449392	0.891858	0.990142	0.769609	0.857992	20
121487327	0.941575	0.943263	0.758805	0.857639	21
483922	0.905748	0.966096	0.765307	0.85702	22
178714	0.855916	0.88609	0.829722	0.855708	23
131878839	0.865946	0.859993	0.840626	0.855186	24
131864317	0.941514	0.921303	0.758805	0.853776	25
137287473	0.962313	0.87854	0.772867	0.85337	26
13205979	0.927825	0.876288	0.785951	0.853364	27
451841	0.911917	0.885344	0.787239	0.853198	28
2783869	0.911917	0.885344	0.787239	0.853198	29
136238399	0.985392	0.927725	0.743022	0.852399	30
8642	0.896528	0.815134	0.853649	0.851991	31
472167	0.872155	0.985941	0.767523	0.851527	32
135398630	0.929557	0.854073	0.791875	0.849614	33
139025758	0.910953	0.866547	0.789449	0.848676	34
512727	0.901628	0.933754	0.758894	0.848389	35
136069427	0.916795	0.830599	0.812851	0.847775	36
87208407	0.811116	0.948853	0.816907	0.84772	37
22057571	0.933001	0.80635	0.828392	0.847517	38
16755631	0.889923	0.830731	0.827102	0.847018	39
3011933	0.964466	0.839005	0.783431	0.846352	40
102505730	0.927877	0.907836	0.753779	0.846301	41
483938	0.873651	0.964181	0.759427	0.846073	42
135439474	0.826875	0.945424	0.798327	0.845795	43
66608846	0.840487	0.946275	0.785195	0.84515	44
515111	0.881335	0.911979	0.769609	0.844243	45
15868081	0.879528	0.912348	0.769848	0.843953	46
135956774	0.941844	0.893836	0.749289	0.843378	47
6603750	0.880989	0.782934	0.880051	0.842452	48
136879425	0.933988	0.890276	0.749259	0.84126	49
492557	0.842682	0.909882	0.788277	0.840558	50
129350	0.896367	0.786597	0.853649	0.840292	51
90663546	0.840651	0.915841	0.785195	0.839849	52
135764626	0.828932	0.876364	0.816986	0.839102	53
5273017	0.832959	0.8231	0.862795	0.838903	54
12097725	0.929293	0.855395	0.766309	0.838871	55
444920	0.936409	0.91386	0.731593	0.838386	56
6479138	0.843608	0.798136	0.880582	0.837926	57
107769	0.851951	0.835592	0.826355	0.837687	58
5273977	0.828067	0.88974	0.804143	0.837402	59
483931	0.931831	0.916919	0.728564	0.836775	60
192597	0.954333	0.840275	0.763085	0.836735	61
483936	0.95818	0.901385	0.725235	0.835898	62
47002148	0.880661	0.886795	0.763813	0.835768	63
475573	0.944978	0.838865	0.764512	0.835586	64
66931238	0.858704	0.838331	0.811641	0.835318	65
5279532	0.859269	0.949479	0.747577	0.834824	66
15160075	0.838781	0.971943	0.749187	0.832312	67
512323	0.91137	0.928293	0.722482	0.832209	68
483927	0.915455	0.969521	0.708699	0.832031	69
136250551	0.962406	0.810571	0.772867	0.832018	70
6479133	0.919535	0.899417	0.72989	0.83171	71
6475928	0.883287	0.928052	0.733733	0.831359	72
22881724	0.909483	0.866547	0.750546	0.831266	73
136157781	0.916795	0.830599	0.771967	0.83126	74
169295	0.959474	0.835221	0.747568	0.829087	75
7264506	0.891836	0.869041	0.752334	0.828898	76
492555	0.884571	0.924379	0.728596	0.828642	77
135538744	0.916602	0.826508	0.768842	0.828587	78
44560559	0.906535	0.965357	0.704615	0.827935	79
122130386	0.872872	0.810021	0.804718	0.827003	80
16721025	0.96257	0.844704	0.73541	0.826933	81
483933	0.947154	0.854329	0.733535	0.826794	82
10333430	0.913627	0.835793	0.75805	0.826442	83
483939	0.918645	1	0.69056	0.826428	84
6450920	0.867852	0.868232	0.760297	0.826187	85
135538674	0.927342	0.715427	0.896568	0.825691	86
391363	0.815103	0.925319	0.767017	0.825646	87
477849	0.815103	0.925319	0.767017	0.825646	88
135596592	0.963346	0.839258	0.73541	0.82544	89
135398597	0.963346	0.839258	0.73541	0.82544	90
515212	0.821726	0.920461	0.761001	0.824493	91
54561889	0.926687	0.822589	0.757009	0.824225	92
53794255	0.927825	0.876288	0.720888	0.823702	93
137072542	0.866018	0.810003	0.799174	0.823152	94
135517354	0.891046	0.86136	0.743545	0.822813	95
126969944	0.811717	0.816486	0.841351	0.82281	96
136259535	0.940058	0.915022	0.697348	0.822773	97
12599	0.946993	0.735511	0.83723	0.822754	98
469869	0.811063	0.870831	0.793429	0.822668	99
136242431	0.874058	0.890238	0.734872	0.822081	100
13963301	0.937506	0.881558	0.710858	0.821866	101
494763	0.822291	0.917961	0.755334	0.821851	102
135398593	0.916795	0.830599	0.749589	0.82184	103
135398701	0.914845	0.934128	0.696487	0.821432	104
135485495	0.977132	0.801566	0.749259	0.820889	105
24822457	0.958976	0.808198	0.747568	0.820377	106
135423946	0.919548	0.776204	0.792478	0.820307	107
5271259	0.906977	0.783054	0.79145	0.820115	108
196676	0.927562	0.702331	0.896568	0.81958	109
480265	0.845833	0.782071	0.83416	0.819028	110
14260256	0.952547	0.721759	0.841276	0.81862	111
483929	0.945353	0.927193	0.68258	0.818557	112
15277413	0.825749	0.753439	0.898971	0.818366	113
451882	0.957392	0.904354	0.687251	0.818319	114
9841193	0.87904	0.818601	0.769309	0.817976	115
99692	0.868969	0.851383	0.751049	0.817966	116
512320	0.921641	0.872609	0.712623	0.81795	117
53653696	0.836909	0.817734	0.800586	0.817939	118
57369656	0.817869	0.974866	0.729695	0.817756	119
196507	0.865712	0.834069	0.76458	0.817622	120
10661693	0.847046	0.776677	0.834262	0.817329	121
515215	0.852914	0.895191	0.733968	0.817245	122
5273980	0.812689	0.882363	0.769609	0.816935	123
121487283	0.954483	0.841477	0.716978	0.816806	124
121217776	0.848308	0.966593	0.70884	0.81651	125
136240744	0.929251	0.786982	0.766309	0.816187	126
5274087	0.933257	0.728301	0.832319	0.816061	127
54109572	0.901224	0.794171	0.771766	0.815594	128
5272907	0.96163	0.790083	0.748135	0.814777	129
151840	0.906071	0.855691	0.720314	0.81422	130
135623679	0.916795	0.830599	0.730518	0.813671	131
512673	0.791429	0.915191	0.760928	0.813165	132
53909207	0.791429	0.915191	0.760928	0.813165	133
5274169	0.902952	0.878162	0.706914	0.813145	134
24776418	0.828414	0.832692	0.780938	0.812881	135
66686600	0.758365	0.839115	0.851389	0.812765	136
131693	0.822412	0.87532	0.755334	0.812686	137
511377	0.758257	0.947895	0.77725	0.812409	138
171490	0.903602	0.775706	0.779014	0.812083	139
136353600	0.812612	0.919117	0.737932	0.811678	140
162367444	0.786072	0.79981	0.853728	0.811462	141
483943	0.91219	0.963247	0.668225	0.811447	142
121007158	0.893599	0.7685	0.789739	0.811135	143
136020889	0.96022	0.786829	0.741723	0.810896	144
135441726	0.856733	0.882449	0.723569	0.810884	145
135538728	0.835264	0.90524	0.725852	0.810817	146
44372621	0.944556	0.880426	0.684976	0.81062	147
44421147	0.944556	0.880426	0.684976	0.81062	148
483924	0.906352	0.902128	0.688765	0.810575	149
6479140	0.848944	0.952882	0.698579	0.810379	150
5272908	0.852971	0.875124	0.728226	0.810191	151
3392033	0.891858	0.990142	0.667872	0.810095	152
71404160	0.878448	0.770031	0.794651	0.81	153
135483717	0.8308	0.953591	0.708502	0.809919	154
5273973	0.953208	0.840518	0.702379	0.809872	155
139025680	0.829364	0.883785	0.737477	0.809451	156
22859454	0.901317	0.755591	0.793949	0.809214	157
92271314	0.892947	0.776704	0.77625	0.809189	158
6857539	0.892947	0.776704	0.77625	0.809189	159
6505368	0.91786	0.846536	0.708612	0.808791	160
6439649	0.91786	0.846536	0.708612	0.808791	161
121487537	0.965901	0.909039	0.662776	0.808618	162
14826108	0.884531	0.838487	0.728596	0.808527	163
481520	0.79116	0.892107	0.760928	0.808388	164
512676	0.859695	0.936212	0.693344	0.808378	165
138375991	0.904279	0.772308	0.769556	0.807441	166
127258203	0.84623	0.772845	0.808375	0.807369	167
90470199	0.75832	0.916077	0.77725	0.807252	168
385457	0.750931	0.872747	0.811754	0.806892	169
12071879	0.889354	0.735087	0.819999	0.806852	170
57354933	0.865946	0.859993	0.720166	0.806308	171
1210964	0.789294	0.962428	0.727003	0.806025	172
511017	0.9342	0.690622	0.855974	0.805905	173
13647253	0.846229	0.768519	0.808375	0.805734	174
135541390	0.787053	0.815401	0.815541	0.805648	175
59628352	0.891656	0.825372	0.727004	0.805589	176
3037732	0.833601	0.835873	0.754479	0.805183	177
511016	0.899837	0.847689	0.707159	0.805022	178
483947	0.80742	0.924737	0.722685	0.80462	179
453081	0.817208	0.869642	0.742232	0.804352	180
5272906	0.974266	0.768397	0.736285	0.803916	181
53642991	0.81484	0.803715	0.79263	0.80357	182
13205977	0.81484	0.803715	0.79263	0.80357	183
16728337	0.824574	0.844137	0.750967	0.803449	184
10029973	0.804259	0.790316	0.814878	0.802957	185
121219148	0.861037	0.831965	0.730696	0.8019	186
11140845	0.896367	0.786597	0.745845	0.801813	187
483921	0.918589	0.849996	0.69056	0.801778	188
488244	0.788916	0.908534	0.737444	0.801697	189
453832	0.866732	0.751885	0.798422	0.801432	190
44560429	0.841275	0.920645	0.694104	0.801427	191
135449322	0.962421	0.923735	0.64301	0.801405	192
3065123	0.766804	0.891606	0.765684	0.801336	193
22787949	0.855901	0.969439	0.670285	0.801331	194
15509509	0.829252	0.934575	0.69571	0.801127	195
511990	0.771608	0.807282	0.82724	0.801041	196
137128751	0.916818	0.768925	0.749589	0.801022	197
22824722	0.824083	0.858399	0.735367	0.800832	198
92148590	0.763873	0.88942	0.768188	0.8007	199
136921547	0.803023	0.930122	0.713761	0.80038	200
121217563	0.871812	0.962346	0.661376	0.800126	201
18655749	0.946902	0.963993	0.632605	0.800021	202
3183	0.880989	0.782934	0.752502	0.799788	203
44629987	0.880989	0.782934	0.752502	0.799788	204
71761487	0.841071	0.85752	0.721552	0.799752	205
13205980	0.927825	0.876288	0.668029	0.799366	206
102602182	0.872519	0.918849	0.672485	0.799077	207
136921541	0.920735	0.762692	0.74831	0.798971	208
3081517	0.940083	0.820826	0.693926	0.798792	209
6450918	0.874807	0.78137	0.755043	0.798786	210
135404725	0.892477	0.791357	0.736202	0.798778	211
163284925	0.888341	0.757336	0.769609	0.798539	212
135991622	0.972823	0.823398	0.681921	0.79847	213
71371786	0.904293	0.887853	0.669569	0.798438	214
71316819	0.817493	0.779113	0.799966	0.7984	215
135398596	0.940058	0.915022	0.645092	0.798097	216
137015000	0.888341	0.755944	0.769609	0.798015	217
22209968	0.721223	0.955019	0.775147	0.797983	218
23421206	0.817869	0.974866	0.683616	0.797879	219
135398631	0.888341	0.75515	0.769609	0.797716	220
137208277	0.888341	0.75515	0.769609	0.797716	221
506492	0.877298	0.755524	0.77575	0.797573	222
135412715	0.905275	0.813964	0.7095	0.797524	223
9816508	0.92915	0.756547	0.746141	0.797328	224
3010374	0.859724	0.703547	0.858905	0.797286	225
3371855	0.923986	0.732407	0.771848	0.796623	226
134220	0.91786	0.846536	0.680814	0.796408	227
71420849	0.937969	0.835288	0.678344	0.795632	228
5279530	0.898529	0.868747	0.674386	0.79534	229
462388	0.972959	0.70018	0.786289	0.795213	230
13871386	0.803384	0.845921	0.745309	0.795107	231
459895	0.831256	0.787036	0.769672	0.79477	232
14842983	0.848484	0.719086	0.835118	0.794728	233
1549370	0.900557	0.740506	0.769609	0.794664	234
135849776	0.821652	0.804625	0.761001	0.79458	235
6481845	0.959049	0.735362	0.747568	0.7943	236
453764	0.85047	0.759679	0.780455	0.794141	237
3009783	0.83182	0.920287	0.683241	0.794019	238
54531183	0.897156	0.961178	0.636497	0.793669	239
124561689	0.897156	0.961178	0.636497	0.793669	240
10125531	0.897156	0.961178	0.636497	0.793669	241
88146187	0.883287	0.928052	0.65189	0.793482	242
266223	0.855761	0.776505	0.757765	0.793429	243
135435172	0.79445	0.861859	0.737444	0.793255	244
133395	0.791894	0.798055	0.789467	0.793115	245
44421198	0.919244	0.934757	0.634311	0.793014	246
14411349	0.752362	0.881477	0.763563	0.792979	247
6479191	0.841349	0.81206	0.736072	0.792959	248
3002126	0.9256	0.907416	0.641533	0.792954	249
483937	0.934599	0.936404	0.628371	0.792854	250
121486916	0.728804	0.936267	0.759262	0.792781	251
6858194	0.867477	0.839355	0.700039	0.792584	252
449599	0.931761	0.723357	0.766595	0.792506	253
4269332	0.806217	0.776416	0.794426	0.792087	254
483935	0.913306	0.947139	0.630447	0.791966	255
5279533	0.92832	0.93488	0.628507	0.791765	256
512329	0.829475	0.895977	0.68985	0.791731	257
51371334	0.866727	0.764257	0.756841	0.791466	258
5274161	0.897684	0.950334	0.634267	0.791393	259
453996	0.784365	0.822555	0.769609	0.791297	260
472166	0.74746	0.877517	0.766083	0.791148	261
23421209	0.891836	0.869041	0.667872	0.79114	262
181830	0.935688	0.816733	0.680325	0.791053	263
53988721	0.84657	0.795842	0.740399	0.790943	264
129874	0.698154	0.921535	0.798276	0.790907	265
10037425	0.944776	0.80443	0.684976	0.79083	266
125924	0.944776	0.80443	0.684976	0.79083	267
15124187	0.825402	0.802414	0.749814	0.790778	268
167350	0.940052	0.836265	0.665699	0.790589	269
136020842	0.818921	0.856136	0.715226	0.790458	270
57351337	0.873637	0.797058	0.720387	0.790096	271
137198969	0.825784	0.800515	0.749257	0.790074	272
14331714	0.894436	0.767518	0.733701	0.790054	273
86751121	0.971201	0.766198	0.70311	0.78967	274
126968625	0.817869	0.974866	0.664468	0.789564	275
23391556	0.845527	0.780617	0.750554	0.789484	276
12994351	0.790269	0.932476	0.695264	0.789006	277
512668	0.867852	0.868232	0.674615	0.788777	278
6481569	0.934954	0.689363	0.796175	0.788746	279
6479139	0.833576	0.922458	0.669264	0.788701	280
5274292	0.81551	0.812123	0.743926	0.788631	281
121006713	0.866541	0.771656	0.741696	0.788361	282
136058528	0.712996	0.804712	0.868637	0.788311	283
515083	0.744355	0.877684	0.761001	0.788207	284
6479144	0.827305	0.93473	0.667157	0.788073	285
6479145	0.827305	0.93473	0.667157	0.788073	286
4102969	0.852827	0.75924	0.761849	0.788022	287
71440751	0.694606	0.981508	0.767313	0.787725	288
515216	0.84548	0.788189	0.73918	0.787685	289
121015029	0.641732	0.956619	0.858643	0.787547	290
462380	0.902308	0.802944	0.694597	0.787329	291
6334737	0.833178	0.84531	0.703941	0.787047	292
77282269	0.910863	0.699998	0.789449	0.787023	293
148744	0.872432	0.789309	0.71958	0.787011	294
449584	0.928242	0.679658	0.80763	0.786974	295
135849775	0.847911	0.822652	0.708298	0.786586	296
22856727	0.874805	0.760549	0.740849	0.786074	297
376367	0.800932	0.895402	0.696119	0.785996	298
511015	0.889487	0.912267	0.637512	0.785532	299
514814	0.795009	0.797646	0.765044	0.785529	300
9992006	0.846793	0.755601	0.761906	0.785163	301
6481567	0.942673	0.676474	0.798351	0.785102	302
137195854	0.925315	0.760171	0.712691	0.785019	303
135406950	0.918985	0.789571	0.691537	0.784998	304
121487298	0.751495	0.852103	0.760833	0.784653	305
137100249	0.808658	0.778967	0.767707	0.784608	306
503109	0.904439	0.829237	0.669569	0.784481	307
9950702	0.901689	0.844259	0.661674	0.784379	308
5280127	0.956794	0.736285	0.720692	0.78436	309
135742144	0.954376	0.760421	0.699841	0.784357	310
131884633	0.7781	0.874868	0.720724	0.784349	311
139025114	0.877137	0.805074	0.697802	0.784084	312
11346228	0.895221	0.867185	0.651395	0.783988	313
483945	0.860285	0.908701	0.649201	0.783962	314
135401003	0.849672	0.751278	0.760364	0.783785	315
23363310	0.892864	0.710703	0.77625	0.783623	316
135508096	0.754378	0.79341	0.804802	0.783417	317
131886803	0.888699	0.920939	0.629863	0.783345	318
45105016	0.809382	0.818376	0.730102	0.783315	319
135462526	0.75697	0.920674	0.712436	0.783028	320
3005554	0.820578	0.732413	0.802799	0.782842	321
6475332	0.827312	0.903955	0.667157	0.782822	322
131886802	0.733445	0.804945	0.816842	0.782812	323
135446908	0.819361	0.893513	0.676455	0.782644	324
136842757	0.726948	0.851432	0.782265	0.782544	325
3065115	0.683506	0.917791	0.792896	0.782458	326
6479898	0.74746	0.877517	0.741332	0.782165	327
136791445	0.945297	0.807096	0.662334	0.781965	328
9794951	0.750798	0.785604	0.811754	0.781688	329
449405	0.896528	0.815134	0.675186	0.781512	330
135398640	0.945297	0.80525	0.662334	0.781442	331
190030	0.817322	0.788404	0.743052	0.781383	332
135511167	0.938156	0.791541	0.673777	0.781258	333
3007124	0.81707	0.702618	0.842426	0.781223	334
135823809	0.924049	0.872693	0.631206	0.781198	335
136217926	0.998408	0.880228	0.607942	0.781155	336
171255	0.952225	0.685708	0.768442	0.78101	337
6334181	0.746575	0.840408	0.763563	0.780769	338
12097724	0.731223	0.868035	0.760174	0.78074	339
135412763	0.929027	0.875723	0.626877	0.780657	340
10730026	0.722308	0.866369	0.771054	0.780653	341
3035986	0.881762	0.871117	0.648023	0.780635	342
138375993	0.8075	0.909984	0.671748	0.780413	343
499786	0.964895	0.818284	0.645595	0.78034	344
3087115	0.785729	0.814577	0.744285	0.780167	345
133458	0.846822	0.741814	0.761906	0.780113	346
135407854	0.94222	0.691109	0.762793	0.77994	347
135457441	0.76469	0.855859	0.732602	0.779906	348
454983	0.856951	0.899526	0.645433	0.779811	349
9795471	0.874071	0.84739	0.661872	0.779593	350
155889176	0.838401	0.906757	0.651495	0.779354	351
65375	0.951543	0.812195	0.650585	0.779173	352
293725	0.810573	0.809577	0.724347	0.778844	353
3036899	0.803149	0.814213	0.725787	0.77854	354
147145	0.817493	0.779113	0.743052	0.778391	355
131879863	0.797628	0.748588	0.790898	0.778277	356
301080	0.797628	0.748588	0.790898	0.778277	357
163888	0.774012	0.770475	0.790288	0.778139	358
136682650	0.915101	0.894825	0.617566	0.777952	359
363533	0.718547	0.871836	0.763545	0.777912	360
135434782	0.792304	0.766286	0.775514	0.777848	361
1190	0.950207	0.671274	0.77727	0.777593	362
122521211	0.764264	0.755119	0.816841	0.777552	363
53962626	0.941431	0.768138	0.681056	0.777486	364
42553079	0.721524	0.851455	0.773065	0.777406	365
6479899	0.883191	0.869624	0.640309	0.777159	366
131871944	0.746198	0.827577	0.763563	0.777147	367
483926	0.947573	0.925347	0.593575	0.777004	368
13051253	0.748714	0.814415	0.771054	0.77687	369
137128750	0.889074	0.734651	0.732608	0.776753	370
5274165	0.821294	0.751859	0.761001	0.776536	371
135616961	0.818103	0.780713	0.736106	0.776512	372
135556930	0.838401	0.906757	0.645041	0.776509	373
3005551	0.697658	0.947607	0.742299	0.776391	374
135403804	0.804083	0.756025	0.770566	0.776247	375
135742137	0.804083	0.756025	0.770566	0.776247	376
149295	0.846524	0.786114	0.710716	0.776172	377
439866	0.868828	0.732941	0.744487	0.776017	378
511856	0.749665	0.818732	0.763806	0.775989	379
6438736	0.909526	0.67871	0.782945	0.775926	380
3037127	0.717962	0.831716	0.787887	0.775692	381
136229440	0.885521	0.823955	0.660528	0.77541	382
3005550	0.818768	0.828476	0.696253	0.775387	383
154730315	0.74246	0.860829	0.737808	0.775206	384
6475885	0.939699	0.952374	0.583687	0.775181	385
135450796	0.93082	0.756046	0.689182	0.775181	386
163285378	0.846297	0.777059	0.715652	0.775141	387
135804809	0.950155	0.67043	0.770425	0.775108	388
136205846	0.821253	0.747859	0.761001	0.775089	389
483934	0.926381	0.951963	0.587394	0.774916	390
68012606	0.933066	0.811987	0.647017	0.774901	391
174519	0.904293	0.887853	0.617883	0.774894	392
452132	0.94653	0.667691	0.774251	0.774663	393
10389132	0.829364	0.883785	0.656206	0.774613	394
150973	0.893859	0.77233	0.690893	0.774563	395
11425350	0.90202	0.7265	0.727636	0.774508	396
152475	0.69019	0.890606	0.774139	0.774203	397
12150479	0.870245	0.741858	0.728989	0.773932	398
14862149	0.855805	0.81313	0.679146	0.773712	399
54008737	0.958183	0.661129	0.77367	0.773354	400
93036	0.874101	0.854286	0.643859	0.77335	401
138375992	0.804189	0.710463	0.814878	0.773067	402
135778987	0.79445	0.861859	0.687284	0.773052	403
12111611	0.938455	0.655752	0.789124	0.772984	404
494651	0.718547	0.871836	0.749074	0.772921	405
10403633	0.854493	0.715501	0.763755	0.772719	406
90954505	0.85457	0.718375	0.760222	0.772647	407
6476965	0.87904	0.818601	0.660516	0.772601	408
5271959	0.785941	0.768968	0.763072	0.772515	409
483923	0.924448	0.914469	0.594464	0.772407	410
21145867	0.859044	0.734124	0.739353	0.772311	411
512324	0.849597	0.84211	0.660835	0.772174	412
452445	0.748807	0.809197	0.761003	0.771951	413
137147094	0.944783	0.718301	0.709048	0.771819	414
6479900	0.759298	0.902891	0.689629	0.771557	415
6479148	0.916293	0.750255	0.690527	0.77134	416
92279160	0.784365	0.822555	0.7159	0.771266	417
444919	0.93757	0.690302	0.739881	0.771214	418
136183881	0.855591	0.686887	0.793644	0.77116	419
135400896	0.898916	0.831809	0.63979	0.771093	420
15938966	0.895264	0.7154	0.732686	0.770888	421
135596626	0.948538	0.898275	0.589425	0.770824	422
92236279	0.823251	0.755718	0.73953	0.770811	423
21139854	0.823251	0.755718	0.73953	0.770811	424
453631	0.696203	0.863514	0.773966	0.770658	425
3080864	0.878201	0.890528	0.618057	0.770486	426
469086	0.823155	0.742683	0.750967	0.770267	427
15036533	0.751743	0.788974	0.771054	0.770238	428
135783067	0.842167	0.800001	0.687924	0.770166	429
498022	0.898889	0.828008	0.63979	0.770119	430
129889465	0.921938	0.756828	0.679201	0.769981	431
451896	0.814059	0.746613	0.75339	0.76995	432
135856015	0.890506	0.741089	0.707477	0.769903	433
451503	0.864924	0.747652	0.715434	0.769665	434
146066	0.703684	0.803966	0.812314	0.769596	435
18653297	0.891883	0.656333	0.804011	0.769405	436
10915407	0.892758	0.675596	0.77625	0.769357	437
481516	0.896152	0.755901	0.689809	0.769199	438
21778597	0.938455	0.655752	0.776392	0.769189	439
14258187	0.697591	0.85037	0.777183	0.769096	440
54718171	0.848338	0.787989	0.690382	0.769089	441
136387048	0.846977	0.859121	0.645574	0.769031	442
121487889	0.907584	0.842421	0.625136	0.768863	443
135602240	0.847911	0.822652	0.665894	0.768862	444
25113134	0.93757	0.690302	0.732528	0.768681	445
135453910	0.77706	0.757468	0.771557	0.768592	446
13871382	0.925439	0.768821	0.664829	0.768561	447
492034	0.920112	0.80741	0.639742	0.768428	448
122280	0.950207	0.671274	0.74822	0.768341	449
10466898	0.783234	0.886612	0.67069	0.76825	450
124297	0.846229	0.768519	0.70511	0.76823	451
12009657	0.805599	0.913221	0.641886	0.76767	452
7195999	0.851418	0.712797	0.753147	0.76734	453
92236670	0.671753	0.851113	0.80524	0.767257	454
54023955	0.896079	0.682861	0.757752	0.76703	455
1272916	0.866727	0.764257	0.693105	0.76702	456
179629	0.866727	0.764257	0.693105	0.76702	457
511644	0.866727	0.764257	0.693105	0.76702	458
5273975	0.810287	0.892666	0.646273	0.767018	459
512669	0.714945	0.903272	0.717457	0.766749	460
446725	0.832777	0.982709	0.601344	0.766666	461
135440620	0.847644	0.729005	0.736116	0.766498	462
92924	0.737685	0.809546	0.755759	0.766275	463
3007771	0.822813	0.748548	0.734139	0.766248	464
352589	0.892318	0.871504	0.610585	0.766111	465
3005552	0.751399	0.786893	0.760833	0.76604	466
121486990	0.913834	0.619508	0.836421	0.766038	467
135527049	0.751207	0.748928	0.800332	0.765987	468
137204795	0.765501	0.765628	0.76637	0.765833	469
5324587	0.847097	0.784937	0.685344	0.765815	470
57369657	0.875926	0.967407	0.582223	0.7658	471
101543	0.875926	0.967407	0.582223	0.7658	472
136088507	0.873069	0.701958	0.745027	0.765451	473
153548	0.917218	0.86602	0.601517	0.765349	474
465413	0.773625	0.70594	0.825744	0.764875	475
451817	0.773625	0.70594	0.825744	0.764875	476
477548	0.797307	0.796065	0.708838	0.764868	477
137249367	0.883559	0.677519	0.765417	0.764838	478
92269812	0.863301	0.627125	0.858905	0.764709	479
6481582	0.854201	0.89694	0.613869	0.76468	480
5274212	0.84166	0.904924	0.617122	0.764678	481
125494510	0.823283	0.752096	0.725865	0.764582	482
21853094	0.69252	0.862514	0.760457	0.764579	483
135402018	0.804083	0.756025	0.736709	0.764426	484
53774252	0.754693	0.952401	0.655483	0.764379	485
512330	0.702855	0.930801	0.709944	0.764348	486
6481583	0.880989	0.782934	0.663965	0.764214	487
5353599	0.880989	0.782934	0.663965	0.764214	488
451836	0.938082	0.655644	0.760546	0.764214	489
136441961	0.918985	0.789571	0.641962	0.764181	490
3036202	0.837053	0.850221	0.644466	0.764038	491
449489	0.825192	0.865664	0.643137	0.763997	492
121487531	0.786411	0.760817	0.745653	0.76388	493
54377788	0.866195	0.841169	0.633282	0.763879	494
121487019	0.89526	0.939066	0.577863	0.763814	495
136025255	0.939043	0.925588	0.566648	0.763762	496
135538673	0.870824	0.746537	0.697506	0.763754	497
163285353	0.809017	0.747412	0.739102	0.763752	498
10848525	0.866641	0.787361	0.666868	0.763625	499
6419973	0.866727	0.764257	0.684508	0.763609	500
451375	0.869098	0.73307	0.709737	0.763358	501
439424	0.925936	0.672682	0.741815	0.763095	502
137099057	0.905144	0.709841	0.711583	0.763072	503
6479143	0.872958	0.7598	0.682618	0.7628	504
469867	0.707223	0.886034	0.723014	0.762488	505
3037684	0.852768	0.815441	0.652373	0.762381	506
101544	0.904924	0.600898	0.862471	0.762213	507
73479	0.740712	0.770906	0.775892	0.762154	508
469094	0.898064	0.753462	0.672506	0.761876	509
512299	0.841349	0.81206	0.659682	0.761758	510
575855	0.705395	0.931646	0.699757	0.761686	511
22848660	0.849576	0.857853	0.627613	0.761561	512
131876403	0.886323	0.864145	0.606209	0.761455	513
512130	0.602862	0.971465	0.813471	0.761411	514
15276896	0.765773	0.772534	0.746352	0.761376	515
162640537	0.90909	0.667878	0.751011	0.761291	516
68768358	0.762944	0.849607	0.689671	0.761211	517
15087558	0.862516	0.85045	0.623726	0.761119	518
494218	0.721223	0.955019	0.674095	0.761064	519
13009364	0.784842	0.763491	0.736002	0.760872	520
137239458	0.795144	0.790428	0.704326	0.760793	521
193091	0.809156	0.846753	0.655577	0.760569	522
483946	0.839656	0.918755	0.603328	0.760539	523
11346636	0.840929	0.657542	0.811189	0.760523	524
67327211	0.914023	0.841285	0.604112	0.760469	525
3012551	0.75782	0.942595	0.646602	0.760355	526
122879	0.785701	0.752352	0.744285	0.76032	527
6992262	0.79372	0.947588	0.619507	0.760272	528
481521	0.871759	0.880753	0.602285	0.760229	529
121217180	0.941219	0.864657	0.582097	0.760127	530
9861379	0.810261	0.689377	0.792803	0.760065	531
135800809	0.870356	0.666499	0.773303	0.760027	532
125508952	0.823724	0.759374	0.706759	0.760009	533
15938965	0.900557	0.740506	0.67734	0.759987	534
136674918	0.875306	0.722653	0.70648	0.759811	535
6481577	0.948281	0.910437	0.560178	0.759771	536
15956150	0.827726	0.883757	0.622873	0.759746	537
454142	0.801374	0.715763	0.767318	0.759719	538
270261	0.886323	0.864145	0.60194	0.75957	539
3007125	0.851609	0.69224	0.753147	0.759486	540
121487344	0.755772	0.742341	0.781437	0.759476	541
14862102	0.868871	0.671731	0.765796	0.759469	542
73312146	0.716289	0.884276	0.706507	0.759439	543
163285680	0.894157	0.789179	0.641494	0.759354	544
155395	0.777123	0.73094	0.771557	0.759272	545
10332009	0.748456	0.862714	0.68869	0.759153	546
135416123	0.690174	0.826537	0.774139	0.759118	547
135449281	0.784144	0.844057	0.671038	0.759047	548
121487090	0.729725	0.93809	0.667746	0.759044	549
41211	0.887678	0.657772	0.769609	0.758983	550
12358318	0.887678	0.657772	0.769609	0.758983	551
256105	0.887678	0.657772	0.769609	0.758983	552
56992563	0.887678	0.657772	0.769609	0.758983	553
10893330	0.878136	0.792385	0.645905	0.758886	554
135538693	0.775856	0.937755	0.631544	0.758849	555
13871387	0.812252	0.730318	0.738868	0.758565	556
3007912	0.914234	0.811823	0.616358	0.75855	557
14826116	0.872861	0.823643	0.62696	0.758219	558
6439557	0.791894	0.798055	0.693921	0.758073	559
71761460	0.827743	0.875284	0.622873	0.758009	560
656409	0.846229	0.768519	0.678749	0.757857	561
136228650	0.961603	0.769809	0.625169	0.757779	562
3081452	0.858581	0.709164	0.724079	0.757552	563
20600569	0.878126	0.658947	0.769609	0.757489	564
18658061	0.798736	0.767077	0.712032	0.757478	565
121487526	0.837874	0.706906	0.740634	0.757458	566
456203	0.768767	0.870684	0.66278	0.757186	567
172915	0.852287	0.696931	0.740238	0.75711	568
10684201	0.694705	0.82022	0.767313	0.757027	569
455217	0.87549	0.874471	0.596131	0.757013	570
512605	0.900201	0.63893	0.780779	0.756998	571
54351187	0.88118	0.726456	0.691502	0.756774	572
42553078	0.721524	0.851455	0.714078	0.756759	573
470199	0.902571	0.877241	0.582592	0.756732	574
15957676	0.704752	0.833614	0.744057	0.756729	575
14825624	0.902958	0.627147	0.795171	0.756664	576
137036988	0.677354	0.815654	0.79234	0.756652	577
3012046	0.919361	0.618741	0.796869	0.756452	578
135459434	0.847748	0.651576	0.799394	0.756414	579
515214	0.809579	0.849054	0.643776	0.756297	580
135554439	0.818696	0.803163	0.666392	0.756184	581
24823119	0.960203	0.906972	0.549803	0.756131	582
191808	0.795776	0.829965	0.663632	0.755917	583
131882875	0.848609	0.686986	0.750562	0.755871	584
136065590	0.676311	0.857375	0.756713	0.755781	585
135437126	0.676311	0.857375	0.756713	0.755781	586
6481830	0.745736	0.758063	0.763563	0.755711	587
100795272	0.927229	0.67378	0.718112	0.755706	588
12810881	0.780322	0.892075	0.639871	0.755696	589
53699095	0.767539	0.852532	0.670208	0.75566	590
139025115	0.884486	0.68451	0.728596	0.755535	591
3008584	0.819766	0.736768	0.717975	0.755455	592
135417318	0.9078	0.655318	0.74901	0.755376	593
124466	0.715242	0.737673	0.821506	0.755241	594
3012254	0.785544	0.796695	0.692063	0.755052	595
145710714	0.795392	0.772262	0.703651	0.755003	596
511997	0.797259	0.737875	0.733367	0.754997	597
72371	0.973162	0.639328	0.736285	0.75477	598
483944	0.866273	0.805603	0.633282	0.754727	599
20839332	0.720818	0.929583	0.66777	0.754705	600
7264507	0.880411	0.785286	0.63921	0.754519	601
139025685	0.764866	0.759962	0.739011	0.75444	602
9904475	0.780441	0.672233	0.828355	0.754438	603
136186017	0.941089	0.728375	0.655832	0.754391	604
14326905	0.720998	0.809701	0.738439	0.754353	605
470800	0.699923	0.894795	0.702908	0.754287	606
107764	0.866727	0.764257	0.661116	0.754238	607
146160877	0.795144	0.790428	0.68701	0.754099	608
504734	0.85224	0.736882	0.691917	0.754047	609
125836	0.864132	0.636841	0.798012	0.753659	610
101926865	0.784493	0.929584	0.616107	0.753589	611
172392	0.776452	0.737551	0.747596	0.753495	612
3037666	0.846919	0.659176	0.779107	0.75342	613
11565302	0.840711	0.665354	0.774655	0.753054	614
56609687	0.849921	0.772022	0.661401	0.75289	615
71621663	0.654853	0.890475	0.752037	0.752858	616
54555880	0.880548	0.675228	0.732922	0.752613	617
136119103	0.985737	0.665778	0.694471	0.752491	618
6482243	0.876074	0.74429	0.667647	0.752486	619
5461897	0.876074	0.74429	0.667647	0.752486	620
481519	0.673968	0.895962	0.72456	0.752394	621
72736985	0.729501	0.857934	0.690592	0.752352	622
136229414	0.828927	0.641135	0.816986	0.752236	623
15957673	0.824624	0.692025	0.750967	0.751878	624
136199998	0.932398	0.565982	0.864498	0.751722	625
121487532	0.927029	0.735296	0.648374	0.751509	626
21117616	0.849532	0.720506	0.700881	0.751087	627
490256	0.903183	0.754021	0.642837	0.751075	628
136219930	0.717476	0.748876	0.789697	0.750842	629
54136175	0.793356	0.836491	0.648699	0.750768	630
92233230	0.793356	0.836491	0.648699	0.750768	631
71374245	0.932472	0.738546	0.641644	0.750753	632
18658060	0.839081	0.784129	0.653356	0.750639	633
135926583	0.801686	0.873138	0.62256	0.750613	634
135616717	0.801686	0.873138	0.62256	0.750613	635
136744872	0.92778	0.708907	0.668029	0.750425	636
512675	0.869356	0.977398	0.547373	0.750404	637
53741175	0.909859	0.716131	0.669261	0.750301	638
137077012	0.856165	0.673752	0.743704	0.750255	639
14776494	0.927568	0.80638	0.594876	0.750139	640
124317	0.845937	0.651587	0.779107	0.750102	641
13831089	0.765457	0.680754	0.816184	0.749948	642
41097849	0.765457	0.680754	0.816184	0.749948	643
16133029	0.931972	0.785087	0.606118	0.749934	644
101609	0.900592	0.627592	0.771766	0.74972	645
14803227	0.735432	0.782573	0.733223	0.749719	646
121486980	0.730054	0.797025	0.726238	0.749697	647
135596618	0.808718	0.876678	0.613625	0.749448	648
3009782	0.926145	0.752967	0.629161	0.749206	649
5274204	0.87613	0.762879	0.644644	0.74918	650
453762	0.863697	0.7124	0.693894	0.748926	651
121006411	0.707605	0.955446	0.653991	0.748807	652
10849857	0.946783	0.776407	0.603841	0.748795	653
127259583	0.86036	0.771227	0.645657	0.748686	654
12081433	0.713631	0.777373	0.757013	0.748406	655
3000291	0.880024	0.622337	0.788607	0.748342	656
135420436	0.772989	0.885951	0.630125	0.748291	657
3034650	0.827844	0.618401	0.839474	0.748071	658
3010410	0.831497	0.831298	0.620729	0.747972	659
5271268	0.939704	0.637294	0.731593	0.747927	660
136042739	0.957978	0.635752	0.725235	0.747908	661
455839	0.855876	0.664036	0.74839	0.747908	662
6450927	0.688811	0.915704	0.685742	0.747857	663
6602210	0.753492	0.779397	0.71325	0.747739	664
22873382	0.910189	0.634538	0.749829	0.74769	665
6481834	0.726451	0.883288	0.666579	0.747651	666
135854977	0.766587	0.68008	0.807354	0.747627	667
10902616	0.871731	0.82446	0.602285	0.747599	668
5270502	0.847046	0.776677	0.646512	0.747581	669
71762304	0.814091	0.62938	0.832823	0.747544	670
456258	0.870035	0.623222	0.790499	0.74715	671
496427	0.860865	0.698566	0.704136	0.74705	672
137128754	0.901915	0.660686	0.719978	0.746849	673
22841776	0.727589	0.968087	0.627547	0.74676	674
10378968	0.679192	0.877481	0.712724	0.746552	675
3081471	0.702073	0.77422	0.76741	0.74652	676
124295	0.809655	0.742845	0.6956	0.746504	677
135457959	0.8308	0.953591	0.563745	0.746503	678
5274188	0.855619	0.789195	0.630176	0.746494	679
136238529	0.889415	0.764523	0.629934	0.746388	680
6435302	0.841349	0.81206	0.622841	0.746346	681
67644571	0.866462	0.608566	0.813245	0.746326	682
13989307	0.856005	0.849254	0.593383	0.746262	683
135596554	0.807638	0.711096	0.726769	0.746168	684
121487527	0.843735	0.641731	0.780948	0.7461	685
6479136	0.7802	0.741382	0.719185	0.746096	686
56608890	0.708396	0.844431	0.702255	0.74606	687
121487476	0.796281	0.773052	0.677981	0.745696	688
131881311	0.868685	0.726762	0.66919	0.745665	689
510969	0.804789	0.893293	0.599239	0.745601	690
135406997	0.849241	0.661041	0.749603	0.745567	691
250904	0.948249	0.761801	0.605353	0.745486	692
21140573	0.670266	0.753078	0.829311	0.745392	693
136756020	0.846236	0.624976	0.799835	0.745119	694
135434850	0.788466	0.713181	0.737444	0.745091	695
5276641	0.776452	0.737551	0.722862	0.744962	696
444450	0.921544	0.679397	0.684409	0.744959	697
512633	0.85831	0.953153	0.54605	0.744724	698
139026052	0.845368	0.844131	0.59799	0.744675	699
451450	0.80638	0.619045	0.847092	0.744607	700
6438459	0.87064	0.935927	0.545664	0.744603	701
6450981	0.87064	0.935927	0.545664	0.744603	702
454140	0.806572	0.732283	0.702365	0.744597	703
137092996	0.729634	0.807732	0.703788	0.744533	704
136251916	0.801632	0.845854	0.62256	0.744511	705
188575	0.755662	0.834108	0.66278	0.744495	706
135960421	0.978032	0.573984	0.791166	0.744329	707
121486995	0.914153	0.623137	0.751447	0.744267	708
135484985	0.784409	0.73563	0.7159	0.744248	709
135410269	0.784409	0.73563	0.7159	0.744248	710
135498235	0.784409	0.73563	0.7159	0.744248	711
191942	0.903413	0.881292	0.551973	0.744215	712
139025108	0.888256	0.621222	0.769609	0.744087	713
6475886	0.860109	0.967732	0.539299	0.744018	714
6482246	0.754258	0.926307	0.615181	0.743931	715
22895138	0.806113	0.762219	0.674913	0.743922	716
514813	0.794034	0.632728	0.83436	0.74387	717
13989306	0.705395	0.931646	0.652207	0.743826	718
12151656	0.823658	0.693667	0.725865	0.743801	719
135976885	0.958935	0.623184	0.727088	0.743687	720
156619778	0.923215	0.60192	0.773606	0.743577	721
54309519	0.855761	0.776505	0.631865	0.743576	722
72217	0.788104	0.733117	0.713247	0.74354	723
90470680	0.78029	0.83706	0.639871	0.743534	724
454120	0.916177	0.887625	0.542677	0.743469	725
133611960	0.874785	0.604904	0.801332	0.743412	726
451965	0.898567	0.601342	0.789449	0.743395	727
16219063	0.880989	0.782934	0.613719	0.743348	728
14483474	0.923986	0.732407	0.631206	0.743268	729
71317010	0.842015	0.730167	0.675557	0.743086	730
455411	0.777855	0.845302	0.635624	0.743078	731
71621351	0.691015	0.833945	0.718757	0.743002	732
136745025	0.918985	0.789571	0.591643	0.742961	733
136768581	0.881684	0.864417	0.565874	0.742944	734
136176852	0.744806	0.744202	0.739794	0.742928	735
146503834	0.777199	0.778649	0.680757	0.742858	736
6439573	0.875401	0.719619	0.664307	0.742822	737
135463029	0.893806	0.680991	0.690893	0.74281	738
6320414	0.767378	0.746832	0.715846	0.742782	739
25074416	0.892758	0.611284	0.77625	0.742772	740
97184	0.855761	0.776505	0.629725	0.742699	741
150856	0.913245	0.737291	0.630447	0.74267	742
121486825	0.769982	0.751887	0.708543	0.742626	743
90474928	0.777176	0.685522	0.771557	0.742514	744
451837	0.843899	0.789349	0.626988	0.742496	745
10978511	0.874184	0.91116	0.548067	0.742468	746
131854439	0.711128	0.784152	0.735334	0.742367	747
121596082	0.777128	0.684753	0.771557	0.742209	748
58859108	0.785701	0.752352	0.693937	0.742172	749
118705336	0.846949	0.68293	0.715833	0.742166	750
92252177	0.834495	0.972712	0.545525	0.741952	751
22885208	0.864664	0.685704	0.700557	0.741912	752
136161656	0.735964	0.86008	0.656282	0.741796	753
3035760	0.956777	0.676609	0.66329	0.741735	754
5279534	0.834448	0.970874	0.545525	0.741723	755
102152336	0.838387	0.669723	0.73509	0.741607	756
54535902	0.915773	0.559495	0.842068	0.741527	757
121487353	0.748714	0.814415	0.673867	0.74149	758
131875668	0.721742	0.866492	0.663807	0.741423	759
490390	0.760183	0.92498	0.605249	0.741398	760
71340416	0.835301	0.671514	0.734437	0.741315	761
46846349	0.817982	0.801473	0.631236	0.741169	762
135508837	0.703288	0.762431	0.76054	0.741139	763
54276168	0.729366	0.832403	0.677147	0.741044	764
5274367	0.682107	0.848485	0.71229	0.740995	765
77620858	0.911966	0.591251	0.787239	0.740972	766
13323933	0.944015	0.632709	0.713564	0.740958	767
137128747	0.911033	0.589796	0.789449	0.740792	768
512325	0.868685	0.930992	0.539299	0.740738	769
330549	0.757567	0.842258	0.646602	0.740683	770
136236477	0.674193	0.845171	0.722287	0.740669	771
71302590	0.975082	0.586568	0.758493	0.740415	772
5271956	0.841644	0.605701	0.816567	0.740382	773
196471	0.837714	0.866193	0.580678	0.740352	774
195779	0.934837	0.516892	0.918206	0.740242	775
54370573	0.819315	0.770538	0.649862	0.740185	776
191599	0.801253	0.788517	0.648412	0.740033	777
135412808	0.707611	0.901106	0.653991	0.739936	778
66535	0.880372	0.937283	0.529588	0.739685	779
12308857	0.880372	0.937283	0.529588	0.739685	780
57047691	0.880372	0.937283	0.529588	0.739685	781
15954525	0.763873	0.88942	0.613686	0.739537	782
10707449	0.791045	0.675443	0.760928	0.73948	783
122631	0.789891	0.897797	0.591922	0.739415	784
53965369	0.703684	0.803966	0.717138	0.739139	785
135743990	0.788059	0.887507	0.597112	0.73913	786
137191441	0.825482	0.851074	0.592315	0.739117	787
131878800	0.815781	0.679495	0.733733	0.739092	788
10492375	0.767001	0.768414	0.687171	0.739071	789
592943	0.900421	0.617489	0.750022	0.739062	790
490629	0.695496	0.756212	0.768452	0.738792	791
135567131	0.814595	0.781151	0.641553	0.738757	792
135416725	0.945057	0.673951	0.662334	0.738757	793
11243988	0.92139	0.578085	0.793082	0.738587	794
107988	0.94365	0.610577	0.733731	0.738574	795
135753280	0.79445	0.861859	0.604277	0.738555	796
121487078	0.883258	0.61597	0.761521	0.738554	797
135616719	0.967098	0.90016	0.509777	0.738531	798
135521334	0.710821	0.765234	0.741033	0.738417	799
68655403	0.840239	0.687307	0.705031	0.738394	800
15590161	0.802316	0.853767	0.603063	0.73836	801
23421207	0.907893	0.718325	0.636976	0.738196	802
135464488	0.938156	0.791541	0.571638	0.738127	803
6320191	0.832959	0.8231	0.601344	0.738127	804
9856930	0.867117	0.644579	0.733733	0.738046	805
15954436	0.814242	0.729871	0.681127	0.738007	806
451834	0.911917	0.885344	0.53246	0.737933	807
135897000	0.682902	0.814773	0.727235	0.737926	808
469095	0.756979	0.888345	0.615181	0.737897	809
129735822	0.86849	0.777771	0.609957	0.737727	810
22555905	0.825473	0.631113	0.782231	0.737655	811
54446036	0.700929	0.884333	0.662293	0.737508	812
10086464	0.82556	0.843882	0.592315	0.7375	813
510142	0.868981	0.798827	0.595076	0.737399	814
91668407	0.737013	0.729532	0.745756	0.73738	815
196324	0.948721	0.905697	0.510256	0.737331	816
72261	0.748471	0.848523	0.641503	0.737315	817
6714006	0.889354	0.735087	0.629934	0.737306	818
136628879	0.782474	0.758287	0.678252	0.737234	819
164891	0.802192	0.733604	0.684381	0.737191	820
147146	0.731751	0.735788	0.744035	0.737159	821
172916	0.868528	0.784567	0.603921	0.737139	822
512322	0.842015	0.730167	0.659774	0.73704	823
5271276	0.846232	0.605445	0.799835	0.736979	824
139025684	0.7688	0.790598	0.66278	0.7369	825
136319505	0.919261	0.587542	0.772867	0.736747	826
500920	0.856379	0.602305	0.794692	0.736591	827
5282192	0.856379	0.602305	0.794692	0.736591	828
10754975	0.712354	0.797349	0.706331	0.736567	829
15689273	0.933001	0.80635	0.560303	0.736299	830
65372	0.794989	0.660914	0.765044	0.736278	831
40496690	0.817681	0.605332	0.823223	0.736049	832
137202792	0.804867	0.84766	0.599239	0.736045	833
451895	0.872486	0.666065	0.699637	0.736005	834
54075693	0.90836	0.60922	0.745164	0.735703	835
3007123	0.721149	0.713339	0.77518	0.735639	836
5287614	0.835118	0.847984	0.580289	0.735623	837
136381024	0.948385	0.653031	0.673269	0.735622	838
136118471	0.85005	0.719393	0.660323	0.735573	839
131858176	0.695037	0.746238	0.768626	0.735484	840
99529	0.791687	0.730038	0.690735	0.735393	841
136434268	0.672634	0.842157	0.710236	0.73524	842
5276957	0.790419	0.737579	0.684417	0.735203	843
6479189	0.860224	0.648444	0.724962	0.735176	844
135708260	0.720938	0.670224	0.830336	0.735075	845
480247	0.859512	0.707533	0.663496	0.734922	846
4210838	0.787794	0.628084	0.813339	0.73489	847
151790	0.854127	0.712798	0.661115	0.734593	848
14367026	0.78782	0.639722	0.793857	0.734319	849
5271695	0.818038	0.730439	0.66783	0.73419	850
54432316	0.625146	0.946589	0.700383	0.73412	851
90176383	0.751743	0.788974	0.670328	0.734062	852
10494279	0.957842	0.598009	0.728336	0.73398	853
10659906	0.781812	0.837355	0.615181	0.733963	854
101643824	0.796767	0.962302	0.55025	0.733903	855
102002581	0.876483	0.867754	0.545675	0.733891	856
135596630	0.78344	0.808129	0.631833	0.733799	857
15289164	0.624481	0.947667	0.699425	0.733712	858
512005	0.799578	0.72866	0.681326	0.733687	859
135467705	0.791762	0.717955	0.696371	0.733367	860
6565903	0.745608	0.660245	0.806736	0.733205	861
149099	0.794541	0.679255	0.733733	0.733191	862
135511063	0.773122	0.89299	0.589882	0.733067	863
56612070	0.739406	0.773979	0.689958	0.733029	864
14484797	0.745538	0.744439	0.709241	0.732735	865
13871040	0.822701	0.537719	0.94731	0.732732	866
22094552	0.826226	0.836139	0.584636	0.732621	867
18469116	0.826226	0.836139	0.584636	0.732621	868
9996041	0.857032	0.813443	0.58083	0.732604	869
21788887	0.672969	0.911006	0.661258	0.732405	870
136806576	0.818103	0.780713	0.623808	0.732388	871
94136	0.880411	0.785286	0.585971	0.732323	872
194102	0.777213	0.68105	0.744285	0.732292	873
473281	0.652592	0.930777	0.671962	0.732271	874
57269864	0.685159	0.771162	0.74491	0.732207	875
274083	0.795898	0.730622	0.677981	0.732073	876
135511113	0.855469	0.661647	0.703031	0.731766	877
469771	0.752362	0.881477	0.606814	0.731752	878
124789650	0.85577	0.705945	0.658705	0.731726	879
452893	0.730311	0.677687	0.795408	0.731723	880
136265295	0.810835	0.801603	0.612422	0.731639	881
71429365	0.876189	0.563465	0.822543	0.731492	882
90117986	0.80775	0.671007	0.726769	0.731445	883
11580280	0.760655	0.949333	0.571383	0.731418	884
514805	0.677392	0.732057	0.79234	0.731327	885
136190395	0.897952	0.666704	0.670942	0.731239	886
18637700	0.845606	0.896242	0.541512	0.731199	887
3035490	0.633794	0.771519	0.808214	0.73116	888
474669	0.872476	0.652892	0.699637	0.731054	889
131886804	0.840651	0.915841	0.535702	0.731037	890
121486894	0.860315	0.576063	0.812143	0.730982	891
92252648	0.942141	0.588407	0.738172	0.730821	892
125494351	0.795507	0.80952	0.615242	0.730807	893
135401030	0.808411	0.635577	0.767707	0.730798	894
135554419	0.967831	0.640193	0.664688	0.730693	895
137346607	0.855801	0.752642	0.617412	0.730635	896
65063	0.921068	0.637537	0.688036	0.730621	897
71441957	0.882511	0.602814	0.753191	0.730584	898
4477522	0.868828	0.732941	0.62522	0.730532	899
481517	0.680734	0.80261	0.717398	0.730518	900
163320932	0.772989	0.885951	0.587041	0.730493	901
12497373	0.948249	0.761801	0.568487	0.730394	902
129318779	0.65595	0.891823	0.682327	0.730155	903
71406419	0.728939	0.703975	0.759262	0.730128	904
512321	0.942026	0.645399	0.668003	0.73004	905
15087556	0.705509	0.745949	0.739372	0.729911	906
542606	0.902113	0.954547	0.492229	0.729868	907
6480502	0.942416	0.598235	0.721777	0.72983	908
92266931	0.885654	0.580726	0.780091	0.729775	909
453820	0.854148	0.698591	0.661115	0.729736	910
121487387	0.783574	0.792981	0.631833	0.729729	911
10826877	0.745608	0.661271	0.792547	0.729693	912
6913097	0.765304	0.805588	0.636435	0.729672	913
100222	0.864734	0.920304	0.519061	0.729638	914
3005547	0.726777	0.963567	0.586118	0.729596	915
137139936	0.66091	0.724582	0.817748	0.72956	916
136691371	0.942564	0.631971	0.68073	0.729542	917
100802	0.734075	0.720625	0.73392	0.729494	918
92132144	0.734075	0.720625	0.73392	0.729494	919
44829127	0.836149	0.787936	0.600559	0.729376	920
131857684	0.84946	0.671111	0.690046	0.729373	921
145710203	0.738234	0.848039	0.62979	0.729362	922
10826879	0.721159	0.801425	0.674095	0.729011	923
54021318	0.925439	0.768821	0.568695	0.72888	924
92264935	0.721747	0.703566	0.762568	0.728589	925
135433550	0.976153	0.530313	0.800937	0.728389	926
23279551	0.746738	0.67943	0.763563	0.728383	927
136164982	0.846236	0.624976	0.742355	0.728324	928
510968	0.797075	0.749568	0.651055	0.728279	929
506142	0.732283	0.835746	0.639091	0.728203	930
137090731	0.90175	0.937808	0.493709	0.728169	931
92245928	0.820827	0.827953	0.581486	0.728039	932
195909	0.913308	0.692211	0.630447	0.727999	933
588153	0.873491	0.59671	0.758918	0.727937	934
20849148	0.707808	0.926926	0.610787	0.727899	935
6918133	0.780409	0.671321	0.73883	0.727856	936
136835831	0.804083	0.756025	0.639598	0.72772	937
66690715	0.845274	0.622551	0.744129	0.727685	938
495034	0.731602	0.682823	0.773332	0.727678	939
392940	0.85771	0.655831	0.695833	0.727619	940
135542427	0.633733	0.759645	0.808214	0.72761	941
156594985	0.734973	0.681218	0.771054	0.727515	942
11219149	0.857591	0.691302	0.659656	0.727449	943
92231374	0.810017	0.64122	0.747651	0.727358	944
395836	0.902885	0.632711	0.693369	0.72735	945
5470398	0.902885	0.632711	0.693369	0.72735	946
10638005	0.700493	0.950925	0.605716	0.727347	947
135816739	0.880785	0.688895	0.648098	0.7273	948
151864	0.732283	0.835746	0.63654	0.727211	949
4304654	0.710648	0.820006	0.665512	0.72721	950
65050	0.745431	0.780917	0.662912	0.72695	951
487686	0.9158	0.517414	0.857572	0.726793	952
514820	0.691786	0.909147	0.629605	0.72679	953
131843750	0.890808	0.730579	0.606152	0.726729	954
70365165	0.873726	0.670639	0.667913	0.726691	955
50313	0.846229	0.768519	0.601446	0.726663	956
121007157	0.733445	0.804945	0.654417	0.726603	957
5271699	0.759223	0.823774	0.621348	0.726575	958
135406949	0.763502	0.654379	0.771054	0.726395	959
12097726	0.759372	0.874247	0.592143	0.726365	960
6439190	0.883586	0.683069	0.649398	0.726341	961
507269	0.721747	0.703566	0.755271	0.726339	962
135743934	0.999016	0.641431	0.639435	0.726162	963
136633725	0.868579	0.746342	0.603921	0.726108	964
453835	0.905257	0.571377	0.767051	0.726031	965
136921545	0.803149	0.732122	0.655056	0.725936	966
5274088	0.856981	0.664105	0.6826	0.725905	967
5279529	0.899484	0.827409	0.536969	0.725819	968
97381	0.795898	0.730622	0.661011	0.725724	969
512004	0.847872	0.696082	0.656523	0.725711	970
150624	0.703134	0.901447	0.620532	0.725661	971
129126	0.792257	0.870719	0.570092	0.725591	972
22316427	0.973162	0.639328	0.648525	0.725484	973
86645125	0.886992	0.710334	0.621139	0.72545	974
5274366	0.691939	0.771413	0.716084	0.725226	975
73323	0.950207	0.671274	0.625451	0.725076	976
91603773	0.899454	0.563466	0.77881	0.7249	977
355902	0.591684	0.94353	0.713046	0.724744	978
451835	0.927301	0.611468	0.696706	0.724646	979
512172	0.828504	0.738185	0.629713	0.724636	980
492556	0.73323	0.856401	0.616887	0.724608	981
139025646	0.717975	0.678109	0.784215	0.724606	982
6475205	0.759298	0.902891	0.574179	0.72459	983
3080744	0.92039	0.761612	0.56494	0.724529	984
452498	0.753935	0.80595	0.631372	0.724359	985
71421156	0.843094	0.658229	0.69344	0.724313	986
5274144	0.914199	0.696715	0.616358	0.724276	987
15954533	0.818762	0.889845	0.542032	0.724186	988
130060	0.898776	0.677875	0.63979	0.723958	989
90663555	0.888699	0.920939	0.494891	0.723945	990
482498	0.905092	0.489812	0.916582	0.723909	991
488968	0.905092	0.489812	0.916582	0.723909	992
13845027	0.873491	0.59671	0.745027	0.723849	993
135409287	0.846236	0.624976	0.727906	0.723795	994
135509108	0.705122	0.745146	0.721832	0.723732	995
136232990	0.782714	0.707234	0.686927	0.723721	996
318920	0.775889	0.816131	0.606546	0.723542	997
135496375	0.6683	0.975299	0.614447	0.723506	998
135459780	0.736512	0.775497	0.665401	0.723476	999
89486751	0.849089	0.784896	0.580492	0.72328	1000
146152	0.653431	0.787423	0.738676	0.723081	1001
132274323	0.786421	0.713744	0.676098	0.723079	1002
45041252	0.796455	0.652676	0.731657	0.723062	1003
503020	0.948368	0.746853	0.560178	0.722909	1004
135955671	0.911303	0.525987	0.825806	0.722891	1005
135480588	0.765712	0.688589	0.717613	0.722845	1006
192785	0.932645	0.563745	0.749594	0.722707	1007
154726241	0.958302	0.626684	0.659122	0.722577	1008
135462273	0.688281	0.807226	0.682614	0.722366	1009
136842861	0.766587	0.68008	0.724389	0.722301	1010
135962086	0.924502	0.710656	0.594464	0.722041	1011
137295291	0.778238	0.66817	0.726329	0.722004	1012
483948	0.93217	0.722491	0.581836	0.721973	1013
511994	0.843608	0.798136	0.571757	0.721927	1014
135482571	0.732393	0.811142	0.638778	0.721917	1015
3012253	0.736524	0.769794	0.665401	0.721807	1016
71371593	0.697457	0.946403	0.595484	0.721783	1017
136045770	0.622693	0.770214	0.790927	0.721709	1018
92136273	0.85577	0.705945	0.631865	0.721526	1019
159285	0.838628	0.697917	0.649324	0.721465	1020
121011373	0.973142	0.844412	0.491112	0.721281	1021
152387	0.902455	0.571345	0.75191	0.721269	1022
21634414	0.800187	0.750617	0.629864	0.721224	1023
14842981	0.941129	0.659928	0.629161	0.721187	1024
5270525	0.618945	0.771108	0.792915	0.721028	1025
514812	0.756851	0.680666	0.72879	0.721014	1026
137105585	0.783011	0.762302	0.632421	0.721005	1027
136734671	0.874312	0.901241	0.50173	0.720985	1028
5271262	0.942578	0.930526	0.464321	0.720966	1029
496870	0.902885	0.632711	0.674404	0.720909	1030
5925915	0.902885	0.632711	0.674404	0.720909	1031
6338568	0.849362	0.678223	0.659397	0.720904	1032
150201	0.842581	0.719107	0.626875	0.720867	1033
6440124	0.842581	0.719107	0.626875	0.720867	1034
6481848	0.842194	0.595182	0.76037	0.720847	1035
511854	0.749665	0.818732	0.617321	0.720843	1036
155898483	0.96113	0.532687	0.773965	0.720825	1037
15059928	0.861056	0.748693	0.593059	0.720822	1038
135763231	0.639162	0.745387	0.791237	0.720789	1039
12800115	0.828145	0.588824	0.780938	0.720733	1040
3012258	0.747453	0.859036	0.594661	0.720658	1041
1814	0.886723	0.529903	0.827414	0.720498	1042
7098661	0.887491	0.95249	0.476063	0.720408	1043
254695	0.932519	0.794441	0.529356	0.720385	1044
14445949	0.728579	0.677028	0.759262	0.720362	1045
153436042	0.728579	0.677028	0.759262	0.720362	1046
162367448	0.840929	0.657542	0.684082	0.7203	1047
477552	0.885935	0.670396	0.643467	0.720212	1048
323498	0.925682	0.529937	0.796899	0.72014	1049
5289071	0.857058	0.766448	0.58083	0.720108	1050
139025107	0.886762	0.789688	0.550795	0.720107	1051
65148	0.820827	0.827953	0.562426	0.720093	1052
135502924	0.747012	0.747476	0.669915	0.720015	1053
18661222	0.672858	0.85948	0.65581	0.719999	1054
9700	0.93757	0.690302	0.600294	0.719973	1055
3012549	0.60055	0.945135	0.686273	0.71995	1056
134694916	0.872829	0.695381	0.62696	0.719865	1057
44266030	0.872829	0.695381	0.62696	0.719865	1058
439693	0.872829	0.695381	0.62696	0.719865	1059
135544549	0.804083	0.756025	0.619576	0.719854	1060
135538690	0.802839	0.655027	0.713761	0.719833	1061
24822456	0.916941	0.80682	0.526902	0.71983	1062
196433	0.756943	0.872233	0.578772	0.719815	1063
118705321	0.866549	0.624116	0.702519	0.719804	1064
451832	0.936051	0.574323	0.722997	0.71978	1065
130583	0.678545	0.992978	0.589418	0.719752	1066
121486963	0.834312	0.595647	0.762017	0.719656	1067
121487093	0.77412	0.977409	0.524422	0.719634	1068
14367012	0.832549	0.755514	0.601344	0.719632	1069
456904	0.946783	0.775415	0.533744	0.719596	1070
127792	0.909616	0.543522	0.782945	0.719564	1071
10308414	0.784299	0.781722	0.613637	0.719562	1072
9834501	0.70093	0.680786	0.783377	0.71955	1073
10541096	0.68261	0.708489	0.77215	0.71954	1074
11777114	0.921325	0.692086	0.604112	0.719324	1075
163285626	0.894539	0.666349	0.640065	0.719248	1076
6450919	0.834859	0.709333	0.63561	0.719198	1077
92131994	0.874785	0.604904	0.718103	0.719118	1078
135447001	0.925856	0.696025	0.598178	0.719086	1079
10923198	0.69239	0.777101	0.692616	0.718975	1080
512332	0.902009	0.549414	0.776445	0.718944	1081
102301571	0.866072	0.630697	0.69266	0.71893	1082
365913	0.685929	0.873059	0.632689	0.718902	1083
135433627	0.740344	0.789426	0.639628	0.718902	1084
516463	0.836396	0.623219	0.721697	0.718814	1085
56634843	0.905416	0.751702	0.563796	0.718689	1086
3012564	0.777658	0.930668	0.536146	0.718687	1087
6478357	0.840845	0.91176	0.507795	0.71862	1088
189495	0.823783	0.655139	0.693791	0.718578	1089
121216595	0.829344	0.649634	0.69571	0.718575	1090
57097210	0.751743	0.788974	0.629962	0.718549	1091
10264875	0.79396	0.630238	0.746611	0.718464	1092
6454581	0.665591	0.864934	0.655316	0.718449	1093
54112622	0.892264	0.795958	0.540283	0.718378	1094
6712985	0.829921	0.88423	0.524553	0.718348	1095
9994258	0.829921	0.88423	0.524553	0.718348	1096
135434851	0.720528	0.745348	0.690556	0.718269	1097
136691103	0.847748	0.651576	0.679465	0.718101	1098
12193788	0.772857	0.829504	0.587041	0.718098	1099
121487464	0.772857	0.829504	0.587041	0.718098	1100
3012256	0.693542	0.799001	0.671466	0.71799	1101
136260496	0.863528	0.628556	0.693894	0.71798	1102
3009858	0.660267	0.735035	0.764815	0.717953	1103
16760025	0.927922	0.510307	0.820437	0.717851	1104
131885942	0.962522	0.525641	0.772638	0.71782	1105
131883224	0.679145	0.765608	0.712724	0.717795	1106
76845223	0.92148	0.572536	0.726524	0.717729	1107
137214373	0.919889	0.948987	0.458048	0.717694	1108
438430	0.74847	0.717785	0.68869	0.717674	1109
137176536	0.748966	0.794767	0.62576	0.717661	1110
135602211	0.748966	0.794767	0.62576	0.717661	1111
45074619	0.820316	0.592307	0.771643	0.717646	1112
121008681	0.916359	0.778848	0.538575	0.717636	1113
454132	0.906662	0.807482	0.52502	0.717448	1114
10106291	0.647608	0.771544	0.741815	0.717322	1115
14826943	0.679379	0.808456	0.676256	0.717281	1116
6479137	0.843608	0.798136	0.560028	0.717074	1117
121219169	0.913122	0.568068	0.735238	0.717066	1118
102057561	0.85562	0.739252	0.59349	0.71699	1119
182378	0.807795	0.632479	0.726769	0.716833	1120
137139937	0.706431	0.764336	0.683341	0.716795	1121
9835200	0.712877	0.780335	0.664296	0.716746	1122
3007911	0.860124	0.61631	0.706493	0.716702	1123
263976	0.860315	0.568561	0.769609	0.716689	1124
59891165	0.771233	0.674896	0.70898	0.716669	1125
3010386	0.718783	0.800582	0.643809	0.716664	1126
515213	0.895102	0.773733	0.548489	0.716575	1127
454141	0.806572	0.732283	0.62811	0.716573	1128
5270803	0.920315	0.638694	0.64603	0.716352	1129
6481828	0.897807	0.62851	0.668294	0.716297	1130
98561	0.764437	0.657969	0.732602	0.716213	1131
288008	0.764437	0.657969	0.732602	0.716213	1132
152162	0.835227	0.832913	0.54187	0.716056	1133
6367704	0.935808	0.599082	0.680325	0.716006	1134
381335	0.935808	0.599082	0.680325	0.716006	1135
489881	0.637984	0.762142	0.75835	0.715949	1136
191215	0.806955	0.71669	0.639129	0.715905	1137
156583186	0.850912	0.531958	0.833909	0.715608	1138
15333756	0.818007	0.562712	0.811732	0.715596	1139
279519	0.938455	0.655752	0.618501	0.715452	1140
71316962	0.907804	0.651363	0.636976	0.71538	1141
135625316	0.683803	0.937249	0.593804	0.715366	1142
125925	0.933001	0.80635	0.509763	0.715209	1143
452277	0.821166	0.593062	0.761001	0.715133	1144
2729613	0.851418	0.712797	0.611364	0.714875	1145
133332	0.720818	0.929583	0.566004	0.714809	1146
118855895	0.783665	0.58752	0.803428	0.714759	1147
121487530	0.913671	0.556288	0.742988	0.714669	1148
137187015	0.824614	0.597077	0.750967	0.714663	1149
12016027	0.869128	0.545181	0.790985	0.714608	1150
15289165	0.594824	0.868974	0.720071	0.714558	1151
135538691	0.710922	0.821678	0.629942	0.714316	1152
136226295	0.723156	0.640865	0.790767	0.714301	1153
135927360	0.911303	0.525987	0.789449	0.714275	1154
135623700	0.911303	0.525987	0.789449	0.714275	1155
125494577	0.888996	0.762558	0.553018	0.714259	1156
90663906	0.628579	0.938829	0.641543	0.714251	1157
53816764	0.84424	0.604816	0.723991	0.714215	1158
5468297	0.935808	0.599082	0.674627	0.714149	1159
3006931	0.839421	0.89792	0.503128	0.713981	1160
14541165	0.884306	0.578522	0.728596	0.713867	1161
6323540	0.90457	0.617213	0.669569	0.713816	1162
5698	0.90457	0.617213	0.669569	0.713816	1163
100652	0.879599	0.734734	0.576162	0.713813	1164
92233233	0.878171	0.551822	0.769609	0.713559	1165
320215	0.942416	0.598235	0.67036	0.713488	1166
136227111	0.930162	0.682641	0.592613	0.713388	1167
124528039	0.838544	0.651884	0.671818	0.713383	1168
135405252	0.771479	0.901293	0.539268	0.713347	1169
167956	0.865951	0.557371	0.769572	0.713308	1170
54526893	0.662222	0.650038	0.85517	0.713186	1171
49783245	0.787794	0.628084	0.737444	0.713121	1172
135625314	0.755106	0.734404	0.655483	0.713075	1173
136166787	0.96844	0.591615	0.664688	0.713017	1174
14803551	0.816787	0.671258	0.666066	0.712932	1175
3006523	0.629166	0.929342	0.641543	0.712909	1176
3006522	0.629166	0.929342	0.641543	0.712909	1177
15403938	0.749991	0.694161	0.696199	0.712756	1178
21123822	0.838804	0.801896	0.549823	0.712725	1179
6334744	0.941691	0.535084	0.749289	0.712504	1180
21120430	0.928271	0.641438	0.628507	0.712458	1181
135914512	0.778238	0.66817	0.697283	0.712312	1182
10379132	0.693593	0.778479	0.671466	0.712304	1183
6480473	0.737413	0.692768	0.707526	0.712211	1184
15928607	0.668193	0.903653	0.614447	0.712153	1185
12067880	0.637564	0.91043	0.639973	0.712052	1186
6475798	0.819816	0.940795	0.491757	0.712023	1187
92202036	0.779027	0.593256	0.789138	0.712015	1188
135459382	0.818103	0.780713	0.573315	0.711913	1189
2783891	0.886723	0.529903	0.790798	0.711749	1190
15747441	0.803417	0.69445	0.650201	0.711726	1191
3012257	0.660586	0.832158	0.662011	0.71152	1192
135544588	0.955796	0.641006	0.613718	0.711368	1193
474355	0.880147	0.725717	0.576413	0.711333	1194
135435044	0.941089	0.728375	0.546955	0.711328	1195
10764891	0.877052	0.842293	0.504399	0.711262	1196
360646	0.660267	0.735035	0.742527	0.71119	1197
493225	0.660267	0.735035	0.742527	0.71119	1198
3012255	0.82502	0.832999	0.535685	0.711155	1199
14862324	0.869513	0.593297	0.710653	0.711136	1200
135435173	0.604691	0.73905	0.812657	0.71112	1201
6481570	0.938296	0.632224	0.629031	0.711069	1202
453663	0.889092	0.566021	0.732608	0.711027	1203
105116	0.810023	0.670644	0.666082	0.710979	1204
54437788	0.802584	0.575346	0.788656	0.710963	1205
477850	0.679433	0.814467	0.654069	0.710878	1206
135492361	0.687473	0.798077	0.658227	0.710857	1207
64975	0.700311	0.70761	0.72454	0.710715	1208
124350898	0.751106	0.597318	0.808186	0.710676	1209
470801	0.717213	0.757203	0.661891	0.710537	1210
10317833	0.811717	0.816486	0.551239	0.710501	1211
133121258	0.811717	0.816486	0.551239	0.710501	1212
6481836	0.762026	0.702317	0.6715	0.710501	1213
136265296	0.804624	0.758583	0.593571	0.710453	1214
5270503	0.740918	0.586528	0.836789	0.710417	1215
10492927	0.773928	0.619196	0.752101	0.710274	1216
163285485	0.847253	0.624985	0.685344	0.710121	1217
316992	0.848609	0.686986	0.622676	0.710114	1218
575859	0.91626	0.774161	0.523106	0.710092	1219
15693167	0.778522	0.676487	0.681999	0.71009	1220
6478372	0.899292	0.828098	0.499033	0.710075	1221
6921725	0.880989	0.782934	0.533229	0.710011	1222
512139	0.637236	0.934763	0.622695	0.709999	1223
486177	0.862961	0.584536	0.72251	0.709978	1224
69909550	0.764157	0.642204	0.731531	0.709915	1225
6333525	0.654439	0.725453	0.755016	0.709818	1226
6481581	0.884643	0.567381	0.728596	0.709512	1227
512001	0.884643	0.567381	0.728596	0.709512	1228
54194934	0.817236	0.575064	0.769858	0.709433	1229
452342	0.716111	0.626198	0.801477	0.709366	1230
20722670	0.873485	0.560128	0.745027	0.709144	1231
90469779	0.903545	0.523201	0.779014	0.709143	1232
21120755	0.901601	0.529797	0.769609	0.709053	1233
455170	0.901601	0.529797	0.769609	0.709053	1234
92252649	0.942141	0.588407	0.668003	0.709017	1235
101245382	0.773223	0.89909	0.528338	0.708942	1236
335400	0.721747	0.703566	0.701571	0.708878	1237
3037219	0.723797	0.675677	0.728314	0.708689	1238
54285617	0.70994	0.792105	0.636162	0.708619	1239
12994352	0.793748	0.620581	0.726965	0.708601	1240
124383959	0.874785	0.604904	0.685402	0.708595	1241
135511168	0.913934	0.485014	0.836421	0.708591	1242
71302592	0.870367	0.714989	0.582852	0.708586	1243
135618545	0.870539	0.765684	0.545664	0.708442	1244
140344780	0.663226	0.832127	0.650662	0.708384	1245
3009328	0.878503	0.538742	0.769609	0.708292	1246
136272494	0.639435	0.873967	0.647072	0.708093	1247
514810	0.659401	0.728636	0.740045	0.708081	1248
451420	0.980503	0.483245	0.793373	0.708069	1249
5099290	0.80898	0.738637	0.599483	0.708016	1250
125493863	0.807958	0.795059	0.560473	0.707973	1251
6560187	0.700096	0.699958	0.723778	0.707818	1252
266348	0.905147	0.450921	0.916582	0.707806	1253
121487519	0.948166	0.91223	0.436758	0.707774	1254
121487457	0.829196	0.686267	0.629032	0.707667	1255
135547062	0.777192	0.671463	0.680757	0.707507	1256
71387182	0.704163	0.767505	0.65698	0.707489	1257
56924437	0.901397	0.587511	0.685692	0.707343	1258
10658983	0.716992	0.747533	0.661091	0.707255	1259
643233	0.828458	0.555385	0.780938	0.707189	1260
18596452	0.911341	0.754312	0.530894	0.707177	1261
9838550	0.849918	0.903175	0.479186	0.707156	1262
68886	0.880989	0.782934	0.526167	0.70712	1263
135583321	0.689929	0.66377	0.774139	0.707058	1264
471524	0.790237	0.812883	0.558286	0.707056	1265
162367439	0.874805	0.760549	0.543475	0.707032	1266
3012249	0.730087	0.614984	0.792099	0.706981	1267
3005965	0.82737	0.683107	0.631073	0.706916	1268
131610021	0.877314	0.531767	0.77575	0.70683	1269
10356196	0.842676	0.541255	0.788277	0.70662	1270
11728978	0.861788	0.668145	0.622159	0.706509	1271
452680	0.932037	0.645723	0.606118	0.706503	1272
10732949	0.899905	0.764679	0.527002	0.706315	1273
77833698	0.873606	0.493919	0.842524	0.706299	1274
21151082	0.873858	0.518154	0.798383	0.706281	1275
125544	0.861777	0.681054	0.609796	0.706234	1276
11278700	0.778735	0.784155	0.582226	0.706192	1277
10019998	0.716194	0.667869	0.736933	0.706166	1278
150667	0.689664	0.702935	0.726449	0.70612	1279
21122981	0.84438	0.613538	0.688059	0.706053	1280
135514572	0.737255	0.583108	0.828546	0.706015	1281
478559	0.644797	0.791729	0.692575	0.705971	1282
3080688	0.866487	0.627176	0.658235	0.70597	1283
121009003	0.883681	0.745455	0.546481	0.705843	1284
127734	0.842146	0.591548	0.715225	0.705822	1285
6450926	0.714945	0.903272	0.558859	0.705662	1286
488238	0.808075	0.582224	0.754093	0.705538	1287
5274009	0.871181	0.64306	0.637705	0.705467	1288
71351190	0.749123	0.771462	0.610787	0.70544	1289
136243250	0.798877	0.552123	0.806907	0.705295	1290
515210	0.773204	0.957101	0.495855	0.70523	1291
13940600	0.864523	0.842682	0.495299	0.705114	1292
459905	0.815767	0.591419	0.733733	0.705094	1293
512587	0.815767	0.591419	0.733733	0.705094	1294
22838430	0.765494	0.590284	0.781887	0.705083	1295
135921348	0.615882	0.962193	0.617668	0.705057	1296
135464489	0.831024	0.841909	0.512735	0.70503	1297
10850176	0.874302	0.90544	0.461567	0.705012	1298
71315467	0.685159	0.771162	0.664613	0.704876	1299
174373	0.829823	0.820559	0.524553	0.704793	1300
136219928	0.760028	0.744871	0.620978	0.704793	1301
135742598	0.760028	0.744871	0.620978	0.704793	1302
10265594	0.791894	0.798055	0.560661	0.704716	1303
121487428	0.673863	0.846294	0.621459	0.704714	1304
21140890	0.879	0.529394	0.769309	0.704514	1305
14039728	0.765624	0.691837	0.661642	0.70449	1306
5271380	0.809655	0.742845	0.586581	0.704377	1307
5274286	0.852942	0.639377	0.649454	0.704336	1308
13766569	0.810456	0.610708	0.711162	0.704213	1309
96373	0.810456	0.610708	0.711162	0.704213	1310
121008097	0.820813	0.722166	0.594739	0.704112	1311
488949	0.860315	0.568561	0.72553	0.704023	1312
129678678	0.770593	0.700935	0.647614	0.703894	1313
9975088	0.8792	0.571238	0.708405	0.703852	1314
10755180	0.863286	0.586567	0.699985	0.703838	1315
137182907	0.785074	0.596092	0.749853	0.703718	1316
125691	0.8792	0.767657	0.528241	0.70365	1317
445093	0.913831	0.472947	0.836421	0.703625	1318
121487459	0.714853	0.91032	0.550046	0.703466	1319
358959	0.886304	0.719419	0.557916	0.703381	1320
136217872	0.760028	0.744871	0.617269	0.703378	1321
71421157	0.778655	0.672794	0.666112	0.703259	1322
44316739	0.842015	0.730167	0.573342	0.703212	1323
6475470	0.75987	0.697978	0.656991	0.703202	1324
10236751	0.852827	0.75924	0.546194	0.70314	1325
54424807	0.693792	0.729611	0.686914	0.703098	1326
15940294	0.887408	0.552685	0.724387	0.703001	1327
135537873	0.751557	0.613145	0.756655	0.702809	1328
512169	0.83411	0.566244	0.74461	0.702806	1329
14366984	0.89446	0.616858	0.642854	0.702628	1330
125895	0.705509	0.745949	0.659585	0.702474	1331
6482245	0.684279	0.770863	0.658949	0.702468	1332
10935032	0.921287	0.621609	0.623295	0.702467	1333
136270978	0.950756	0.582267	0.650585	0.702433	1334
14132955	0.69762	0.641424	0.777183	0.702397	1335
57035796	0.810456	0.610708	0.705014	0.702246	1336
5272848	0.914679	0.66157	0.588102	0.702173	1337
3009859	0.845571	0.62255	0.665431	0.702083	1338
155906098	0.681017	0.628909	0.813754	0.702012	1339
479691	0.825216	0.869006	0.494352	0.701809	1340
18397420	0.712853	0.620233	0.78555	0.70178	1341
6453528	0.89446	0.616858	0.640065	0.701663	1342
46173764	0.911014	0.495222	0.789449	0.701661	1343
6449933	0.876074	0.74429	0.540475	0.701591	1344
135458972	0.911303	0.525987	0.740972	0.701578	1345
169938	0.856408	0.742876	0.551678	0.701538	1346
128757	0.776268	0.722488	0.618023	0.701425	1347
135743865	0.842929	0.649454	0.637505	0.70137	1348
451849	0.871565	0.615464	0.653981	0.701306	1349
86308410	0.759239	0.753915	0.605474	0.701306	1350
163285627	0.865041	0.78444	0.518564	0.701195	1351
10889684	0.78498	0.597208	0.739675	0.701108	1352
11243021	0.969109	0.528286	0.70311	0.700989	1353
96565	0.81149	0.537408	0.801034	0.700989	1354
131877129	0.883855	0.681494	0.583242	0.700958	1355
5272849	0.924585	0.653821	0.586858	0.700908	1356
131853148	0.669226	0.881794	0.594605	0.700831	1357
511014	0.772849	0.913748	0.50187	0.700733	1358
54347690	0.75857	0.814109	0.563021	0.700683	1359
127263478	0.777721	0.525747	0.85593	0.700478	1360
136272490	0.799031	0.886666	0.497443	0.700452	1361
10467227	0.537112	0.803629	0.807005	0.700416	1362
14018268	0.860315	0.572536	0.70844	0.700398	1363
330407	0.618941	0.770914	0.722736	0.700344	1364
6440090	0.846524	0.786114	0.524892	0.700249	1365
3035713	0.92681	0.423807	0.91624	0.700178	1366
137139924	0.895148	0.760553	0.516639	0.700166	1367
10467582	0.880182	0.751599	0.529588	0.700078	1368
135625266	0.678913	0.872113	0.589418	0.70005	1369
122130785	0.821139	0.784897	0.539414	0.700015	1370
136257920	0.644352	0.770432	0.692575	0.699879	1371
469866	0.680465	0.902654	0.571571	0.699849	1372
5270780	0.688586	0.916312	0.558279	0.699808	1373
160283	0.78897	0.751549	0.582067	0.699766	1374
15742005	0.879699	0.555332	0.715	0.699733	1375
150959	0.909816	0.516388	0.749234	0.699732	1376
6131	0.902105	0.507227	0.767761	0.699537	1377
188216	0.687857	0.846154	0.595388	0.699522	1378
504733	0.90565	0.60891	0.63577	0.699455	1379
135421231	0.691117	0.694363	0.713045	0.69942	1380
22211503	0.836396	0.623219	0.66278	0.699278	1381
5271958	0.658968	0.808363	0.645999	0.699275	1382
50312	0.749514	0.738751	0.619055	0.69912	1383
27476	0.874785	0.604904	0.656585	0.698991	1384
10687208	0.93757	0.690302	0.544549	0.698691	1385
374904	0.873726	0.670639	0.591886	0.698614	1386
137108250	0.682902	0.814773	0.61721	0.69856	1387
12313774	0.799052	0.704083	0.609553	0.698556	1388
6481847	0.842194	0.595182	0.687924	0.698554	1389
97675	0.942141	0.588407	0.636131	0.698541	1390
88175526	0.767083	0.648258	0.687171	0.698526	1391
159480	0.794755	0.609889	0.706909	0.698452	1392
495778	0.935808	0.599082	0.627463	0.69841	1393
471523	0.790235	0.778786	0.558286	0.698269	1394
76973925	0.796904	0.659328	0.651055	0.698204	1395
131882935	0.711783	0.752448	0.636683	0.698138	1396
6478042	0.877096	0.784619	0.504399	0.697921	1397
5273510	0.832653	0.685197	0.601344	0.697756	1398
6560385	0.810456	0.610708	0.690999	0.697703	1399
121006824	0.68622	0.827482	0.603537	0.697673	1400
454533	0.531812	0.785675	0.823155	0.69762	1401
516467	0.832323	0.769577	0.536762	0.697531	1402
58696770	0.846229	0.768519	0.529562	0.697495	1403
139025682	0.654762	0.830062	0.629918	0.697438	1404
6858204	0.756933	0.590139	0.763149	0.697368	1405
21136976	0.769314	0.586991	0.754932	0.697303	1406
516466	0.780618	0.708065	0.615891	0.697262	1407
14775386	0.930892	0.541356	0.693015	0.697184	1408
18660583	0.85443	0.566862	0.709357	0.697184	1409
66599986	0.76111	0.68145	0.654572	0.69713	1410
53795348	0.66097	0.630982	0.818169	0.697048	1411
135771852	0.613303	0.831993	0.669883	0.696987	1412
10827042	0.66022	0.744817	0.689356	0.696981	1413
1250152	0.730275	0.572924	0.815947	0.696859	1414
135456775	0.979203	0.424358	0.853067	0.696813	1415
92279507	0.807614	0.507955	0.838056	0.696794	1416
439541	0.918303	0.501749	0.754484	0.696769	1417
71352407	0.768546	0.776469	0.570664	0.69672	1418
136177058	0.923345	0.557477	0.675594	0.696713	1419
136806184	0.743095	0.589317	0.775892	0.69658	1420
136176844	0.870356	0.666499	0.591588	0.69643	1421
59728433	0.923986	0.732407	0.513267	0.696396	1422
5287615	0.769176	0.834933	0.532588	0.696345	1423
136801906	0.783011	0.759703	0.571422	0.696315	1424
90673693	0.714629	0.684635	0.690137	0.696309	1425
71374221	0.82758	0.676791	0.608028	0.696273	1426
3081384	0.827552	0.676204	0.608028	0.696071	1427
5276642	0.749514	0.738751	0.610787	0.695994	1428
131698258	0.749514	0.738751	0.610787	0.695994	1429
58521221	0.85577	0.705945	0.565336	0.695843	1430
21856241	0.85577	0.705945	0.565336	0.695843	1431
3007129	0.764601	0.603625	0.732602	0.69578	1432
18650247	0.780357	0.587227	0.73883	0.69573	1433
496020	0.716004	0.818101	0.579635	0.695686	1434
135622951	0.627244	0.713111	0.75448	0.695677	1435
136847919	0.882021	0.841744	0.46407	0.69551	1436
135398727	0.882021	0.841744	0.46407	0.69551	1437
136134225	0.882021	0.841744	0.46407	0.69551	1438
71444956	0.933147	0.641682	0.578952	0.69548	1439
92242756	0.695311	0.649297	0.745732	0.695348	1440
91668349	0.857554	0.726438	0.547385	0.695345	1441
6560425	0.721315	0.58159	0.806899	0.695262	1442
451833	0.929419	0.585708	0.635323	0.69519	1443
11870684	0.863772	0.480639	0.825183	0.695154	1444
92751	0.799052	0.704083	0.600083	0.694966	1445
57113422	0.745431	0.780917	0.579645	0.694878	1446
51571861	0.745431	0.780917	0.579645	0.694878	1447
131882637	0.688142	0.714347	0.682614	0.694858	1448
15160057	0.672294	0.779993	0.641886	0.694822	1449
101335352	0.834682	0.551089	0.737169	0.694782	1450
513058	0.807347	0.578859	0.722685	0.694734	1451
136776919	0.701682	0.657209	0.727289	0.694624	1452
459896	0.745608	0.660245	0.681641	0.694623	1453
6481833	0.697122	0.833934	0.582203	0.694617	1454
11821571	0.701118	0.579301	0.832882	0.694513	1455
46875339	0.575925	0.852285	0.690999	0.694496	1456
477853	0.842267	0.720572	0.558259	0.694482	1457
137019865	0.91238	0.544873	0.689894	0.694376	1458
90732286	0.859275	0.750283	0.526845	0.694315	1459
21677361	0.587421	0.8083	0.70967	0.694274	1460
46242340	0.711446	0.853786	0.557761	0.694135	1461
13387406	0.891873	0.497308	0.769609	0.694135	1462
10922291	0.707668	0.698425	0.676499	0.694041	1463
7058165	0.903442	0.685089	0.551973	0.693979	1464
481528	0.496942	0.953419	0.729115	0.693828	1465
3012550	0.693628	0.908353	0.542396	0.693822	1466
131878904	0.630965	0.813285	0.655181	0.693814	1467
136232965	0.745517	0.627046	0.715769	0.693796	1468
21824456	0.534587	0.762963	0.82703	0.693645	1469
131072	0.583597	0.685668	0.843052	0.693628	1470
5271953	0.857154	0.664911	0.593118	0.693621	1471
136250325	0.565067	0.837555	0.712362	0.69358	1472
71749595	0.806708	0.65437	0.635221	0.693385	1473
5278281	0.712706	0.5981	0.78555	0.693345	1474
136896502	0.590606	0.72192	0.785454	0.693309	1475
11335407	0.81099	0.648169	0.637266	0.69305	1476
11000823	0.890633	0.628027	0.606152	0.69291	1477
9795336	0.697776	0.658073	0.72485	0.692884	1478
34768	0.891405	0.592256	0.642142	0.692858	1479
7059457	0.886723	0.529903	0.720547	0.692791	1480
76973875	0.7926	0.662751	0.635758	0.692774	1481
136248812	0.878341	0.825573	0.467475	0.692754	1482
21117413	0.781801	0.529357	0.811131	0.692747	1483
21855041	0.792826	0.773444	0.54598	0.692601	1484
135445750	0.682902	0.814773	0.601216	0.692583	1485
5461894	0.870129	0.519622	0.745998	0.692537	1486
13831580	0.51462	0.821864	0.793915	0.69246	1487
54220117	0.865387	0.489565	0.796031	0.692366	1488
136232092	0.649685	0.727928	0.702178	0.692306	1489
136195916	0.605089	0.760257	0.723299	0.692249	1490
265025	0.70093	0.680786	0.694992	0.692172	1491
9813340	0.929639	0.453715	0.806839	0.692081	1492
145681	0.61985	0.717591	0.746775	0.692077	1493
376225	0.90101	0.48646	0.771766	0.692028	1494
14503364	0.701296	0.695762	0.679177	0.691999	1495
135422884	0.844369	0.599898	0.660978	0.691944	1496
135433622	0.844369	0.599898	0.660978	0.691944	1497
20646474	0.873064	0.770994	0.500007	0.691912	1498
453629	0.870263	0.666936	0.579029	0.691856	1499
5276958	0.707644	0.722313	0.647939	0.691702	1500
488237	0.698785	0.845209	0.566344	0.691663	1501
15539852	0.84746	0.536522	0.736116	0.691629	1502
136898426	0.73455	0.586282	0.771054	0.691534	1503
121220862	0.692484	0.6983	0.68381	0.691499	1504
65095	0.9054	0.661687	0.563796	0.691462	1505
14603759	0.890136	0.623434	0.606503	0.691349	1506
92228821	0.700847	0.796346	0.595122	0.691348	1507
11077469	0.861032	0.552202	0.704136	0.691347	1508
22451350	0.864924	0.747652	0.517936	0.691239	1509
6479135	0.846524	0.786114	0.502615	0.691234	1510
21824451	0.807087	0.874808	0.475486	0.691162	1511
14376122	0.763353	0.92592	0.478151	0.690956	1512
44250004	0.795512	0.632218	0.658763	0.690903	1513
162641872	0.856113	0.702884	0.55479	0.690899	1514
136270374	0.9026	0.685698	0.543668	0.69084	1515
467292	0.820358	0.608801	0.664941	0.690833	1516
9797212	0.730275	0.572924	0.792099	0.690777	1517
121486748	0.748524	0.676226	0.651957	0.690732	1518
6439549	0.720818	0.929583	0.504132	0.690587	1519
10198943	0.738905	0.866331	0.521561	0.690564	1520
240186	0.714744	0.506804	0.933192	0.690539	1521
136823426	0.73455	0.583649	0.771054	0.69052	1522
73319	0.729824	0.622132	0.726238	0.690504	1523
12800102	0.748524	0.67664	0.650644	0.690407	1524
481518	0.553158	0.842899	0.712844	0.690324	1525
23149721	0.773928	0.619196	0.688578	0.690324	1526
99678	0.966084	0.51573	0.683826	0.690264	1527
453833	0.880024	0.622337	0.610039	0.69018	1528
135493733	0.956737	0.490202	0.723322	0.690175	1529
6327750	0.514171	0.812765	0.793915	0.690126	1530
92238038	0.787794	0.628084	0.666639	0.690043	1531
6439816	0.870129	0.519622	0.736727	0.68998	1532
117951445	0.673686	0.629358	0.777074	0.689961	1533
506489	0.828614	0.490799	0.816986	0.689929	1534
136236459	0.606578	0.839586	0.650898	0.689888	1535
137218720	0.839973	0.50587	0.781163	0.689857	1536
13887514	0.852251	0.526364	0.740238	0.689829	1537
25447	0.745713	0.576293	0.766948	0.689824	1538
5272749	0.751058	0.570352	0.769609	0.689795	1539
10966430	0.838248	0.502153	0.788269	0.689767	1540
86592810	0.50361	0.836465	0.787231	0.689696	1541
59035043	0.720134	0.558874	0.821241	0.689643	1542
136025160	0.795144	0.521563	0.7973	0.689617	1543
14188779	0.883547	0.581878	0.648309	0.689547	1544
135410303	0.711179	0.736953	0.626167	0.689447	1545
22861866	0.870873	0.731688	0.521424	0.689436	1546
22803666	0.880411	0.785286	0.481323	0.689435	1547
135439388	0.929458	0.646513	0.559723	0.689406	1548
456513	0.786363	0.638612	0.654665	0.689327	1549
66802809	0.791522	0.670965	0.619091	0.689231	1550
12150481	0.828568	0.746403	0.534036	0.68923	1551
472175	0.759239	0.753915	0.574179	0.689205	1552
13927	0.759239	0.753915	0.574179	0.689205	1553
25796482	0.759239	0.753915	0.574179	0.689205	1554
476786	0.817599	0.569602	0.707905	0.6892	1555
481523	0.629085	0.816211	0.641543	0.689133	1556
3081042	0.768546	0.776469	0.551039	0.68898	1557
135508725	0.737255	0.583108	0.763214	0.688927	1558
453782	0.920544	0.514099	0.706536	0.688893	1559
15051913	0.878356	0.549531	0.687373	0.688839	1560
135456714	0.795232	0.651136	0.633586	0.688683	1561
14630104	0.758095	0.640468	0.673893	0.688659	1562
136633647	0.845392	0.544057	0.716827	0.688531	1563
135518164	0.754113	0.569415	0.762508	0.688331	1564
137699423	0.866961	0.592101	0.643765	0.688315	1565
92236322	0.779027	0.593256	0.708057	0.688282	1566
10685594	0.844869	0.845687	0.46226	0.688247	1567
124254961	0.923215	0.60192	0.601072	0.688193	1568
118991702	0.923215	0.60192	0.601072	0.688193	1569
174657	0.683603	0.766723	0.623092	0.688093	1570
102428366	0.819655	0.574078	0.697021	0.688043	1571
77068305	0.6951	0.581103	0.811278	0.688038	1572
131858703	0.602584	0.906411	0.60845	0.687919	1573
464365	0.938455	0.655752	0.543607	0.687913	1574
366996	0.751135	0.539753	0.808186	0.687901	1575
3005548	0.748484	0.628045	0.693517	0.68789	1576
489519	0.771233	0.674896	0.626912	0.687854	1577
71410527	0.919511	0.510293	0.708612	0.687836	1578
10879554	0.759112	0.58683	0.732602	0.687808	1579
124923	0.793681	0.569078	0.723778	0.687759	1580
481078	0.793681	0.569078	0.723778	0.687759	1581
452096	0.611208	0.714556	0.746193	0.68774	1582
137077003	0.941481	0.483578	0.732528	0.687708	1583
451851	0.863281	0.544692	0.699985	0.687672	1584
25075887	0.810573	0.809577	0.49949	0.68752	1585
131852023	0.799736	0.781854	0.52255	0.687231	1586
135920662	0.682902	0.814773	0.586733	0.687145	1587
10588735	0.848439	0.593995	0.650231	0.687096	1588
5274689	0.86559	0.521313	0.727297	0.687054	1589
15118691	0.660327	0.815059	0.606172	0.686999	1590
135398550	0.595155	0.710673	0.768697	0.686967	1591
136065188	0.627244	0.713111	0.725255	0.686881	1592
136826947	0.627244	0.713111	0.725255	0.686881	1593
137186166	0.958155	0.47957	0.725235	0.686811	1594
135408506	0.639162	0.745387	0.680815	0.686794	1595
86295187	0.750149	0.532477	0.815984	0.68666	1596
3006946	0.908816	0.438621	0.825226	0.686614	1597
512138	0.693834	0.636417	0.733584	0.686564	1598
3037739	0.774896	0.528773	0.794331	0.686529	1599
121487492	0.688822	0.828635	0.571165	0.686526	1600
21676639	0.836535	0.683777	0.570164	0.686416	1601
45105015	0.876118	0.745582	0.501356	0.686401	1602
446048	0.891405	0.592256	0.623023	0.686381	1603
136229819	0.917909	0.676369	0.531453	0.686174	1604
135410340	0.579152	0.827174	0.678734	0.685983	1605
481524	0.763439	0.896992	0.478151	0.685901	1606
464388	0.657185	0.577387	0.860179	0.685891	1607
131852022	0.653885	0.789579	0.62725	0.685863	1608
10335670	0.884152	0.506403	0.729983	0.685734	1609
135696522	0.622693	0.770214	0.673923	0.685712	1610
6398342	0.949309	0.805673	0.430499	0.685696	1611
147648	0.85501	0.458081	0.831486	0.685648	1612
5270689	0.953353	0.726863	0.477175	0.685598	1613
136092262	0.852173	0.489472	0.779107	0.685424	1614
54528106	0.905166	0.438258	0.822976	0.685367	1615
3881219	0.769095	0.632921	0.66278	0.685323	1616
133673908	0.978783	0.410658	0.821025	0.68528	1617
472173	0.687158	0.919108	0.519986	0.68527	1618
92979558	0.872591	0.502056	0.742858	0.685231	1619
51407982	0.817681	0.605332	0.653947	0.685192	1620
12795836	0.760724	0.530005	0.801963	0.685141	1621
102304745	0.936604	0.49624	0.707452	0.685011	1622
483930	0.95826	0.876174	0.390016	0.68487	1623
466385	0.681732	0.915973	0.524322	0.684746	1624
71374323	0.650909	0.7005	0.704189	0.684694	1625
53744408	0.695323	0.619892	0.745732	0.68469	1626
14430362	0.611208	0.714556	0.735856	0.684666	1627
92043420	0.770218	0.54425	0.768641	0.684651	1628
191759	0.734193	0.629463	0.694964	0.684609	1629
135407175	0.720938	0.670224	0.66424	0.684581	1630
504740	0.73308	0.65684	0.666712	0.684564	1631
10040433	0.927838	0.73754	0.477765	0.68454	1632
45357259	0.771233	0.674896	0.617711	0.684508	1633
3011251	0.899078	0.659201	0.550469	0.684505	1634
14862110	0.93382	0.502283	0.698835	0.68444	1635
195200	0.719735	0.850811	0.5281	0.684364	1636
3005949	0.678471	0.595038	0.797117	0.684313	1637
21852789	0.646858	0.945057	0.538209	0.684245	1638
12787947	0.684133	0.904145	0.526675	0.684187	1639
22811380	0.745736	0.758063	0.56798	0.684131	1640
121487055	0.863937	0.503521	0.743068	0.68408	1641
135618603	0.908719	0.612027	0.586921	0.684075	1642
5272754	0.594811	0.748768	0.720071	0.684065	1643
514815	0.853314	0.480372	0.787058	0.684	1644
92266369	0.815781	0.679495	0.580361	0.683902	1645
494096	0.671753	0.851113	0.563985	0.68359	1646
136136546	0.850132	0.653577	0.580367	0.683576	1647
12803287	0.96	0.54091	0.633888	0.683533	1648
131801285	0.869165	0.679044	0.547373	0.683532	1649
135768164	0.778238	0.66817	0.615664	0.683453	1650
18658702	0.782593	0.549119	0.745314	0.683385	1651
137077004	0.854098	0.570634	0.661115	0.683321	1652
135415643	0.7947	0.592874	0.679421	0.683185	1653
121487362	0.739532	0.598017	0.722097	0.683179	1654
11054122	0.88664	0.679586	0.536546	0.683177	1655
452128	0.861888	0.601316	0.622159	0.683171	1656
9992804	0.627481	0.795129	0.641543	0.683152	1657
11186205	0.777972	0.734243	0.559808	0.683113	1658
135582356	0.86398	0.500525	0.743068	0.682908	1659
135528754	0.951552	0.52518	0.654479	0.682859	1660
10491412	0.594137	0.745445	0.720071	0.682844	1661
59628308	0.858545	0.724552	0.516183	0.682772	1662
10833407	0.564088	0.86708	0.657892	0.68267	1663
2779363	0.863772	0.480639	0.772041	0.682561	1664
90674669	0.514229	0.782205	0.793915	0.682554	1665
139024710	0.904874	0.424543	0.835674	0.682539	1666
71749030	0.756851	0.680666	0.617863	0.682403	1667
160598	0.712364	0.771265	0.579808	0.682393	1668
454530	0.607121	0.909587	0.586352	0.682367	1669
3505393	0.827844	0.618401	0.624746	0.682318	1670
29921448	0.589946	0.659626	0.821194	0.682312	1671
92231363	0.589946	0.659626	0.821194	0.682312	1672
21140410	0.557044	0.824893	0.695432	0.682309	1673
672230	0.700311	0.70761	0.641127	0.68227	1674
89299280	0.894623	0.540766	0.666273	0.682235	1675
4661673	0.803524	0.704036	0.563691	0.682225	1676
512134	0.628877	0.78955	0.641543	0.682169	1677
333596	0.628877	0.78955	0.641543	0.682169	1678
92264929	0.628877	0.78955	0.641543	0.682169	1679
136067613	0.795144	0.521563	0.768354	0.682143	1680
469868	0.685929	0.873059	0.535957	0.682122	1681
515224	0.7239	0.620408	0.707206	0.682107	1682
5496661	0.95783	0.465252	0.728336	0.682096	1683
451819	0.797124	0.613628	0.651055	0.681986	1684
66739168	0.797124	0.613628	0.651055	0.681986	1685
53901126	0.814405	0.767015	0.509576	0.681776	1686
21140449	0.803454	0.702605	0.563691	0.681767	1687
7282371	0.756771	0.556022	0.754707	0.681697	1688
20584074	0.704017	0.597822	0.753464	0.681563	1689
11208805	0.841546	0.747355	0.506115	0.681424	1690
135464486	0.920393	0.593422	0.591267	0.68137	1691
14367015	0.560413	0.779636	0.725997	0.681365	1692
14367014	0.560413	0.779636	0.725997	0.681365	1693
135483941	0.612048	0.887654	0.590757	0.681347	1694
135483976	0.612048	0.887654	0.590757	0.681347	1695
135503550	0.798877	0.552123	0.719627	0.681308	1696
6478043	0.856379	0.602305	0.619024	0.681227	1697
10586962	0.780107	0.678954	0.59812	0.681088	1698
92265797	0.947254	0.383196	0.877774	0.681001	1699
5319815	0.833039	0.472444	0.805567	0.680888	1700
511984	0.553748	0.853392	0.673788	0.680885	1701
161806	0.791761	0.525469	0.76095	0.680837	1702
121486931	0.885495	0.466899	0.769609	0.680833	1703
138375984	0.761305	0.695321	0.596989	0.680736	1704
452065	0.864301	0.459867	0.798012	0.68072	1705
71422332	0.678516	0.791286	0.589418	0.680707	1706
484779	0.930613	0.500826	0.689182	0.680594	1707
469715	0.825051	0.558164	0.688034	0.680478	1708
514817	0.73717	0.888249	0.485884	0.680459	1709
136817853	0.710821	0.765234	0.580205	0.680398	1710
23519663	0.676875	0.816603	0.572683	0.680379	1711
71422792	0.869066	0.615991	0.595076	0.680376	1712
21139829	0.666831	0.600468	0.789031	0.680363	1713
489880	0.796569	0.529985	0.748157	0.680318	1714
54556091	0.751883	0.84497	0.498038	0.680217	1715
11130655	0.815715	0.527901	0.733733	0.680183	1716
124407178	0.815715	0.527901	0.733733	0.680183	1717
45039587	0.559015	0.695993	0.811451	0.679951	1718
25880707	0.559015	0.695993	0.811451	0.679951	1719
21818055	0.85248	0.501135	0.740238	0.679933	1720
13845018	0.904874	0.424543	0.823036	0.679922	1721
6478489	0.898554	0.52574	0.674386	0.679837	1722
13590781	0.810434	0.462662	0.840866	0.679827	1723
121225517	0.678759	0.787531	0.589418	0.679791	1724
137160593	0.797717	0.499305	0.790898	0.679778	1725
91525741	0.796716	0.558023	0.708775	0.679761	1726
14308792	0.750149	0.532477	0.787262	0.679464	1727
137184934	0.752107	0.750313	0.556723	0.679417	1728
455179	0.607121	0.909587	0.577846	0.679375	1729
454528	0.607121	0.909587	0.577846	0.679375	1730
478560	0.6307	0.590956	0.848328	0.679363	1731
137167219	0.761188	0.678272	0.608283	0.679356	1732
139592726	0.512433	0.709022	0.870243	0.679344	1733
135422917	0.605646	0.895599	0.586578	0.679262	1734
477551	0.882191	0.770187	0.46407	0.679225	1735
51409932	0.938455	0.655752	0.520038	0.679223	1736
357107	0.980503	0.483245	0.680098	0.6792	1737
123789960	0.946635	0.798238	0.418895	0.67919	1738
100932477	0.751782	0.555469	0.751315	0.679125	1739
3012563	0.677573	0.850383	0.547694	0.679114	1740
515099	0.778067	0.630156	0.640112	0.679024	1741
451614	0.799095	0.536143	0.732602	0.678961	1742
136734354	0.842473	0.724936	0.515072	0.678918	1743
355900	0.559893	0.957137	0.599472	0.678746	1744
164580	0.953365	0.549412	0.612516	0.678724	1745
452946	0.95776	0.456282	0.728336	0.678673	1746
467294	0.684927	0.681952	0.669201	0.678655	1747
452397	0.919858	0.442139	0.775007	0.67864	1748
481522	0.824801	0.772737	0.491696	0.678621	1749
92258080	0.779466	0.489826	0.820243	0.678538	1750
136795137	0.687473	0.798077	0.571185	0.678515	1751
14095555	0.849317	0.655262	0.56551	0.678445	1752
57105083	0.555186	0.825418	0.684699	0.678395	1753
507023	0.84829	0.486727	0.758417	0.678207	1754
6455470	0.905092	0.489812	0.711583	0.67819	1755
56606362	0.939571	0.427273	0.784021	0.678181	1756
121486953	0.860009	0.497131	0.733644	0.678174	1757
5273969	0.958145	0.456781	0.725235	0.678126	1758
9814370	0.947046	0.438012	0.76086	0.678094	1759
72212336	0.624481	0.947667	0.539312	0.678044	1760
137239010	0.83035	0.563903	0.669406	0.678019	1761
135538738	0.737255	0.583108	0.725688	0.677998	1762
5274184	0.841951	0.783617	0.473445	0.677966	1763
15160537	0.926498	0.471379	0.722017	0.677759	1764
3081390	0.912963	0.633882	0.546767	0.677692	1765
23399682	0.863291	0.612122	0.594666	0.677653	1766
12994226	0.671933	0.654845	0.707323	0.677645	1767
121487358	0.727458	0.579836	0.738422	0.677638	1768
456327	0.615437	0.742908	0.681106	0.67761	1769
461854	0.615437	0.742908	0.681106	0.67761	1770
126455407	0.777721	0.525747	0.76197	0.677586	1771
3010826	0.728324	0.563221	0.759262	0.677554	1772
6483689	0.740129	0.506092	0.83291	0.677486	1773
11129803	0.789762	0.666996	0.591922	0.677469	1774
5326138	0.766012	0.61591	0.659946	0.677393	1775
135509485	0.588234	0.732554	0.721795	0.677354	1776
126797	0.75857	0.814109	0.504189	0.677336	1777
92150211	0.718686	0.593588	0.728839	0.677295	1778
150623	0.789301	0.884288	0.446248	0.677214	1779
101335356	0.838944	0.603818	0.617179	0.677152	1780
14367030	0.638525	0.655745	0.741829	0.677044	1781
21115121	0.856785	0.489783	0.742582	0.677041	1782
481515	0.782526	0.547076	0.726022	0.677001	1783
135443291	0.681937	0.806789	0.565804	0.676958	1784
135538729	0.859215	0.842334	0.42803	0.676833	1785
100998153	0.870721	0.596713	0.602977	0.676808	1786
472172	0.785701	0.752352	0.525129	0.676797	1787
11109507	0.904573	0.518473	0.669569	0.676794	1788
6479209	0.900201	0.63893	0.546231	0.676705	1789
510573	0.927253	0.441222	0.762683	0.676588	1790
15276822	0.646268	0.902485	0.538209	0.676534	1791
92248971	0.669413	0.667234	0.693182	0.676498	1792
11197465	0.669711	0.82722	0.561199	0.676358	1793
126970070	0.762944	0.849607	0.478151	0.676285	1794
90477196	0.639271	0.613177	0.791237	0.676246	1795
3000371	0.790893	0.637351	0.615181	0.676209	1796
5278278	0.500538	0.844249	0.734063	0.676199	1797
90673692	0.930245	0.790647	0.421977	0.67614	1798
14351747	0.882315	0.604202	0.586481	0.676065	1799
375686	0.903267	0.542859	0.638481	0.675918	1800
88518334	0.812437	0.723185	0.526592	0.675853	1801
71351836	0.885495	0.466899	0.749853	0.675843	1802
15928623	0.66699	0.913386	0.513328	0.675731	1803
131881293	0.59334	0.865927	0.606209	0.675716	1804
46780611	0.816413	0.593955	0.638786	0.675613	1805
139025304	0.816413	0.593955	0.638786	0.675613	1806
131865335	0.780889	0.820057	0.481374	0.675507	1807
163199202	0.717948	0.647847	0.662906	0.675507	1808
137256436	0.915337	0.43529	0.775577	0.675341	1809
6479335	0.715116	0.866279	0.499711	0.675339	1810
21769199	0.846296	0.510336	0.715652	0.675285	1811
25724943	0.863772	0.480639	0.743237	0.675111	1812
96326068	0.863772	0.480639	0.743237	0.675111	1813
121487025	0.799299	0.598041	0.645663	0.675086	1814
6553756	0.863772	0.480639	0.743068	0.675066	1815
135764690	0.79445	0.861859	0.44892	0.675064	1816
49866464	0.877979	0.596817	0.593448	0.67506	1817
136257794	0.754113	0.569415	0.716768	0.675006	1818
121486766	0.730061	0.580363	0.726238	0.675002	1819
121008390	0.83951	0.494056	0.742746	0.674983	1820
92156037	0.8049	0.639651	0.599239	0.674921	1821
128866	0.732942	0.710693	0.590488	0.674912	1822
72264	0.711753	0.543101	0.79661	0.674908	1823
67566518	0.619457	0.627662	0.792915	0.674901	1824
135499520	0.737255	0.583108	0.715338	0.674862	1825
54401242	0.825473	0.631113	0.592315	0.674634	1826
12873547	0.633046	0.75703	0.641268	0.674561	1827
134693185	0.633046	0.75703	0.641268	0.674561	1828
6451965	0.633046	0.75703	0.641268	0.674561	1829
92132221	0.633046	0.75703	0.641268	0.674561	1830
65510	0.765457	0.680754	0.589023	0.674279	1831
135482132	0.831601	0.682639	0.542041	0.674239	1832
51521949	0.818007	0.562712	0.66783	0.674092	1833
26323207	0.818007	0.562712	0.66783	0.674092	1834
273749	0.721742	0.866492	0.491424	0.674034	1835
477953	0.875872	0.592416	0.596131	0.674023	1836
10423457	0.690232	0.573598	0.774139	0.673947	1837
137212578	0.753081	0.559257	0.727106	0.673946	1838
148264	0.811593	0.685843	0.551239	0.673885	1839
135538692	0.718892	0.690107	0.616998	0.673875	1840
9881814	0.519196	0.809097	0.729115	0.673867	1841
135526591	0.956831	0.521636	0.626544	0.673855	1842
3065117	0.749748	0.864593	0.472419	0.673784	1843
117590598	0.703489	0.595439	0.730379	0.673742	1844
34365251	0.74328	0.641728	0.641543	0.6737	1845
6440103	0.657408	0.957689	0.49511	0.673691	1846
3012028	0.884703	0.633076	0.551463	0.673655	1847
6479188	0.883586	0.683069	0.509976	0.673541	1848
14539818	0.718307	0.767527	0.554464	0.673519	1849
453632	0.90154	0.504084	0.678307	0.673422	1850
15673565	0.934532	0.496838	0.666991	0.673338	1851
470796	0.67211	0.85021	0.536953	0.673321	1852
10469766	0.714342	0.602319	0.709252	0.6732	1853
136248813	0.914558	0.792656	0.419953	0.673195	1854
14367013	0.534587	0.762963	0.747837	0.673178	1855
453997	0.591684	0.94353	0.557299	0.673076	1856
134694010	0.872591	0.502056	0.699217	0.673011	1857
100997305	0.761231	0.604499	0.66278	0.672875	1858
136088499	0.747159	0.490667	0.830439	0.672794	1859
10266554	0.684936	0.789542	0.563994	0.672789	1860
23531406	0.919877	0.453673	0.732498	0.672584	1861
54444717	0.80174	0.44802	0.843427	0.672574	1862
22873853	0.83673	0.680428	0.536183	0.672535	1863
15609009	0.678574	0.761065	0.589418	0.672493	1864
451522	0.767165	0.680242	0.583238	0.672448	1865
18661221	0.584896	0.778319	0.668743	0.672392	1866
477875	0.777618	0.660185	0.592983	0.672357	1867
136666654	0.772963	0.67067	0.587041	0.672353	1868
101039156	0.792697	0.702918	0.54598	0.672347	1869
22803042	0.904924	0.600898	0.566132	0.672279	1870
131843751	0.852594	0.680396	0.526012	0.672267	1871
3034569	0.787794	0.628084	0.615181	0.672185	1872
135582772	0.850627	0.758116	0.470053	0.672085	1873
135538672	0.789614	0.620129	0.621164	0.671999	1874
118992169	0.747827	0.503407	0.804759	0.671868	1875
72249	0.856785	0.489783	0.723569	0.671852	1876
3011927	0.815971	0.492003	0.754175	0.671823	1877
9900206	0.592043	0.856931	0.601867	0.67179	1878
121487343	0.755772	0.742341	0.540108	0.67178	1879
455171	0.859044	0.734124	0.480901	0.671778	1880
92262454	0.890289	0.454742	0.748799	0.671772	1881
234506	0.8049	0.639651	0.590227	0.671667	1882
121486943	0.877209	0.620361	0.561674	0.671633	1883
15333771	0.826955	0.605936	0.607188	0.671574	1884
125494151	0.611997	0.720102	0.686167	0.671173	1885
454161	0.760166	0.657392	0.605249	0.671051	1886
71407837	0.795617	0.439688	0.858516	0.671032	1887
317398	0.85577	0.705945	0.501056	0.671002	1888
23263706	0.640258	0.628791	0.75068	0.670901	1889
98315	0.707668	0.698425	0.610787	0.670817	1890
91668475	0.961128	0.531416	0.603548	0.670792	1891
451593	0.929639	0.453715	0.719054	0.670782	1892
488245	0.81375	0.675372	0.55025	0.670772	1893
4369196	0.752437	0.778552	0.514348	0.670759	1894
3010090	0.635866	0.653002	0.727043	0.670759	1895
135897124	0.682902	0.814773	0.542997	0.67064	1896
446164	0.927244	0.425647	0.762683	0.670605	1897
248869	0.810017	0.64122	0.582256	0.670596	1898
191372	0.872591	0.502056	0.690893	0.670592	1899
101335355	0.716058	0.525262	0.801477	0.670556	1900
57223801	0.807614	0.507955	0.734042	0.67053	1901
83862	0.891405	0.592256	0.576902	0.670475	1902
149098	0.804609	0.670568	0.55915	0.670302	1903
16655024	0.933772	0.603646	0.542795	0.670261	1904
14862109	0.93382	0.502283	0.649674	0.670092	1905
53835084	0.77039	0.480819	0.809027	0.670033	1906
453781	0.761024	0.516242	0.764193	0.670028	1907
193604	0.897268	0.457882	0.732211	0.670022	1908
154705095	0.663226	0.653902	0.693579	0.670015	1909
155889111	0.96844	0.591615	0.536806	0.670004	1910
154703288	0.758385	0.647162	0.612962	0.669869	1911
44205198	0.689175	0.587296	0.742739	0.669869	1912
135460966	0.882021	0.733755	0.46407	0.669869	1913
136927403	0.882021	0.733755	0.46407	0.669869	1914
135625234	0.882021	0.733755	0.46407	0.669869	1915
401060	0.701989	0.682827	0.626931	0.669804	1916
97576	0.892147	0.414821	0.804011	0.669767	1917
90476898	0.780146	0.586816	0.656369	0.669527	1918
366988	0.734112	0.587373	0.695938	0.669507	1919
8033145	0.919613	0.410213	0.788956	0.669481	1920
8033146	0.919613	0.410213	0.788956	0.669481	1921
483941	0.575332	0.951616	0.55862	0.669468	1922
451615	0.760358	0.510059	0.771409	0.669367	1923
121486818	0.848675	0.445419	0.787538	0.669326	1924
405420	0.700976	0.652909	0.655165	0.669308	1925
6481568	0.874947	0.458805	0.744727	0.669297	1926
3012248	0.771701	0.57439	0.676703	0.669281	1927
136226316	0.855916	0.88609	0.388346	0.669163	1928
124442843	0.65098	0.802095	0.574832	0.669119	1929
183239	0.750149	0.487694	0.815984	0.669069	1930
183205	0.750149	0.487694	0.815984	0.669069	1931
13845302	0.867625	0.504586	0.68561	0.668961	1932
507025	0.855561	0.548661	0.640757	0.668925	1933
15081290	0.777861	0.589533	0.653389	0.668914	1934
124170	0.902105	0.507227	0.658667	0.668844	1935
54443874	0.864799	0.668715	0.519061	0.668743	1936
351382	0.765457	0.680754	0.573796	0.668638	1937
10956375	0.765457	0.680754	0.573796	0.668638	1938
71314711	0.765457	0.680754	0.573796	0.668638	1939
51403981	0.765457	0.680754	0.573796	0.668638	1940
92244181	0.819655	0.574078	0.637004	0.668605	1941
6713933	0.690459	0.607765	0.711961	0.668526	1942
90472727	0.744805	0.541371	0.739794	0.668465	1943
10399334	0.678492	0.84402	0.522434	0.668415	1944
391259	0.567023	0.883528	0.601107	0.668414	1945
3010388	0.575925	0.852285	0.611499	0.668356	1946
71762520	0.974358	0.402756	0.758493	0.668268	1947
452036	0.711753	0.543101	0.771054	0.668191	1948
477852	0.875875	0.700785	0.486406	0.66816	1949
54359085	0.674516	0.725391	0.609526	0.668104	1950
504738	0.73316	0.53173	0.763563	0.66808	1951
512626	0.916512	0.610795	0.538575	0.667979	1952
135515425	0.720492	0.7433	0.556012	0.667974	1953
21117472	0.897708	0.500226	0.666906	0.667865	1954
56619127	0.757272	0.639116	0.615181	0.667602	1955
2817368	0.760724	0.530005	0.736331	0.66755	1956
6479190	0.880271	0.641698	0.529588	0.66751	1957
6438602	0.880271	0.641698	0.529588	0.66751	1958
139025306	0.793421	0.577018	0.650236	0.667437	1959
494929	0.710648	0.820006	0.509413	0.667422	1960
21677555	0.541881	0.871981	0.63268	0.667397	1961
135856438	0.871893	0.517284	0.661376	0.667338	1962
5274149	0.858163	0.391756	0.866664	0.667318	1963
475547	0.942294	0.342953	0.890408	0.667296	1964
5287590	0.747063	0.593765	0.669915	0.66729	1965
325261	0.947254	0.383196	0.805326	0.667204	1966
5276644	0.712914	0.489979	0.848648	0.667178	1967
135768162	0.737255	0.583108	0.690582	0.667171	1968
118034228	0.735222	0.578333	0.697876	0.667099	1969
7349522	0.74328	0.641728	0.622618	0.667095	1970
121487017	0.742561	0.907376	0.438413	0.667092	1971
12009658	0.715361	0.894293	0.463272	0.667034	1972
135409474	0.527784	0.696748	0.806226	0.666983	1973
131853290	0.615824	0.780198	0.617668	0.666759	1974
10945668	0.810023	0.670644	0.545966	0.666756	1975
512674	0.588087	0.774676	0.651073	0.666755	1976
3010383	0.553814	0.794392	0.673788	0.66672	1977
73345328	0.608928	0.653852	0.743659	0.66646	1978
136592262	0.536062	0.854213	0.648335	0.666415	1979
125496087	0.716428	0.544687	0.757247	0.666407	1980
71442569	0.765655	0.785252	0.489582	0.666381	1981
20871287	0.767707	0.72224	0.532487	0.666335	1982
250667	0.820838	0.495753	0.724403	0.666285	1983
13845019	0.904874	0.424543	0.762325	0.666205	1984
9883997	0.949986	0.651787	0.482263	0.666145	1985
104762	0.803614	0.49273	0.742785	0.666059	1986
14680716	0.94542	0.460265	0.68258	0.666059	1987
54515638	0.75432	0.586371	0.667796	0.665978	1988
503012	0.794184	0.533451	0.696155	0.665917	1989
10083846	0.905781	0.621174	0.529081	0.665893	1990
162660830	0.572808	0.721313	0.713863	0.66584	1991
135783064	0.740757	0.573007	0.694964	0.66583	1992
5274089	0.826163	0.6032	0.594033	0.665824	1993
92149401	0.81149	0.537408	0.676657	0.66579	1994
69908761	0.796082	0.546441	0.677981	0.665714	1995
492032	0.733205	0.643842	0.624178	0.6654	1996
124296	0.70994	0.792105	0.522499	0.665329	1997
3080626	0.863301	0.627125	0.546079	0.66526	1998
[truncated: 4,792 more rows]

## Sheet: 1. Toxicology
cid	Probability of nontox
5273008	0.181644
5273004	0.198203
250899	0.203479
15926747	0.207072
9882903	0.207072
354624	0.207072
13989334	0.209321
13989335	0.209321
492197	0.21189
6483433	0.215533
516053	0.219322
3034808	0.224004
14485373	0.224004
470067	0.22448
12777818	0.224815
87824027	0.225394
296233	0.225394
21147181	0.228426
24867261	0.228426
14330066	0.238835
14330067	0.238835
53791036	0.240896
92132405	0.241071
69626224	0.241071
11778706	0.241071
10040688	0.241261
77844687	0.241261
492559	0.242922
12777820	0.247487
492201	0.250043
14803115	0.252416
14803116	0.252416
5487206	0.257013
492117	0.258625
492116	0.258625
13989343	0.260788
162354766	0.263569
15172869	0.2646
3009936	0.269213
90487625	0.269544
11551453	0.271994
9965654	0.277084
14284094	0.282173
511719	0.282717
21140106	0.282779
15573114	0.285012
9879442	0.285012
15573115	0.285012
44398142	0.285012
40488632	0.285012
8974	0.285012
44629847	0.285012
11957496	0.285012
6603778	0.285012
504745	0.291944
71775556	0.292333
124201	0.293693
493452	0.293986
287709	0.297555
22791353	0.297697
128924	0.298537
92132157	0.299434
73265308	0.299434
147569	0.299434
6602111	0.299434
90488943	0.299434
13009312	0.299434
265574	0.299618
24906265	0.299618
10085225	0.299618
92236137	0.299618
92236135	0.299618
16760678	0.299618
131846804	0.299618
154726303	0.299892
493454	0.300593
197610	0.302507
10517505	0.302507
9973143	0.305869
56977943	0.306384
100938413	0.309774
14018661	0.30996
13989345	0.311721
470065	0.31196
44626655	0.313426
21140467	0.315924
512717	0.317893
121486905	0.318323
512127	0.321107
71305626	0.321107
46874399	0.321107
45038620	0.321107
92233558	0.321107
10039594	0.322079
492200	0.325933
121486895	0.326328
3010354	0.329609
125496047	0.329949
21139599	0.330015
7173845	0.334989
102197	0.334989
46874491	0.334989
45358303	0.334989
44629881	0.334989
45357254	0.334989
21797130	0.334989
3012227	0.337637
464373	0.338039
3061100	0.33858
50989994	0.33858
492561	0.343953
21815879	0.345448
3007217	0.349975
21116879	0.350605
7065210	0.350605
93003	0.350605
44629860	0.350605
11098172	0.3533
350834	0.353952
6481604	0.354255
10565387	0.354511
10946143	0.354928
126968624	0.354943
21854299	0.354943
130712	0.355891
57346774	0.356336
6478491	0.356426
456109	0.358797
10517504	0.359973
10380149	0.360532
121486870	0.361367
584362	0.363996
10686845	0.365859
72212339	0.366376
11162398	0.368305
10934996	0.368682
92132092	0.368682
334830	0.368682
512555	0.370087
71431122	0.371324
126969176	0.371324
131887892	0.372113
131880518	0.372669
66524133	0.3732
163285340	0.373811
71314761	0.374547
469442	0.376477
466018	0.376511
54101611	0.377275
10220985	0.377275
6441200	0.377275
14803093	0.377275
118989478	0.377275
54101612	0.377275
129653012	0.377481
94480465	0.379017
9882803	0.379017
10471224	0.381929
72201	0.383034
14485380	0.383034
100327	0.383371
324309	0.383371
5273014	0.384665
13072932	0.386549
40468020	0.386549
68197667	0.386549
42553747	0.386549
54669720	0.386549
16129586	0.386549
53869019	0.386549
3367	0.386549
13072931	0.386549
8975	0.386549
44629914	0.386549
154716223	0.386549
46705411	0.386549
45039261	0.386549
503813	0.386846
131881042	0.389344
470053	0.390133
10946114	0.390469
134229959	0.390491
7043952	0.391535
6595184	0.391535
355280	0.391768
121487874	0.392346
128771	0.392692
15926748	0.393459
15926749	0.393459
71341063	0.394348
10356486	0.394348
10265867	0.394348
67785972	0.394348
481530	0.395175
121487869	0.395368
511720	0.398661
11808175	0.399292
98140	0.399292
11832914	0.399292
482505	0.399292
11087275	0.399292
504751	0.399625
92236361	0.40014
490627	0.402282
512128	0.402615
94001662	0.402941
91810866	0.402941
13108018	0.402941
24206417	0.402941
134695307	0.402941
1268279	0.402941
5327118	0.402941
13463	0.402941
131852786	0.404712
53908939	0.404966
6479249	0.405917
131858702	0.406423
484807	0.406566
472636	0.406831
260138	0.407578
121217040	0.407578
126916	0.407859
490444	0.410332
512679	0.410639
273017	0.410927
21121551	0.411821
15450711	0.411965
57216635	0.411965
163199084	0.411965
160751	0.411965
138114911	0.412878
6483431	0.412878
11243974	0.415106
12907243	0.415326
47751	0.415326
134714751	0.415326
1265902	0.415326
44629846	0.415326
45357134	0.415326
121487870	0.415419
13989347	0.416181
57368267	0.416181
464374	0.416707
7458588	0.417049
7058183	0.417049
22861745	0.417106
490440	0.41722
9925859	0.417492
102381544	0.417767
68742335	0.418629
11173824	0.419396
92237060	0.41952
97453	0.41952
5494430	0.419769
393545	0.419792
69527463	0.420174
504749	0.421267
92301827	0.42233
6482628	0.42233
49784135	0.422824
472638	0.423305
472656	0.423305
10588022	0.423513
10588021	0.423513
3011898	0.424223
469441	0.425351
21821295	0.42626
3012586	0.426426
121486770	0.42657
131883271	0.426603
57116127	0.426832
6976932	0.426832
27556867	0.426832
15607330	0.426832
100551	0.42789
466022	0.428607
10850803	0.430838
12939902	0.431541
12939901	0.431541
2777912	0.431541
44283163	0.431541
46783463	0.431541
96544	0.431541
10521478	0.431541
7070208	0.431541
688019	0.431541
90673794	0.431705
299952	0.432618
481082	0.433504
10108316	0.433625
6480510	0.433717
490628	0.433761
196788	0.433822
87824325	0.434172
5272658	0.434289
5273749	0.436044
5271377	0.436044
3009937	0.436197
5271782	0.437426
73351959	0.438876
155889717	0.439094
154706402	0.439094
5272659	0.439375
76973629	0.439445
92021270	0.439606
44633776	0.439606
3007216	0.440722
472657	0.441283
472639	0.441283
162653200	0.44163
447199	0.441638
10831407	0.441938
131858477	0.442092
131875471	0.442576
91150325	0.442711
6913230	0.442798
3363163	0.442798
503811	0.443066
459942	0.443433
247678	0.444122
10265835	0.444411
11119839	0.444457
87150598	0.444737
70610597	0.444938
643968	0.444938
5702211	0.444938
13071731	0.444938
43834572	0.444938
853012	0.444938
450214	0.444938
9881867	0.445243
10716626	0.445748
154701264	0.446109
14237950	0.446265
6426626	0.446265
23757287	0.44633
92262645	0.446357
131858479	0.446357
160418	0.446594
23518344	0.44695
118796809	0.447338
128557	0.447921
88101259	0.448368
452091	0.449131
58478862	0.449131
9971101	0.449131
472655	0.449555
49791785	0.449555
472632	0.449555
9994200	0.449672
22316435	0.449672
15677395	0.449672
76974063	0.450003
92228414	0.450829
11824	0.450829
512290	0.450829
247955	0.450829
73353418	0.451538
70587122	0.451705
54571321	0.451906
129009617	0.452682
451908	0.453529
76973399	0.454263
11779021	0.45476
490621	0.455172
490623	0.455172
131881813	0.455392
194101	0.456361
73442717	0.456821
92230799	0.456821
494271	0.457297
89858725	0.457299
447864	0.457625
69626062	0.457625
489877	0.457954
1468	0.45813
131708761	0.458504
10446782	0.459505
310052	0.459567
15612856	0.459567
5272657	0.459585
9948218	0.45982
71832128	0.460512
42553032	0.460512
42553033	0.460512
3011901	0.460676
6450904	0.460697
50989698	0.460697
360644	0.461831
21592214	0.462321
481083	0.462386
481081	0.462386
484808	0.462812
469861	0.46291
6479208	0.463281
101670692	0.463326
131880742	0.463872
15410716	0.46393
512680	0.464035
72501	0.464694
121487433	0.464965
3011924	0.466927
21829243	0.467247
14410899	0.467333
512286	0.467342
516040	0.467403
395997	0.468498
457015	0.468697
10067373	0.469512
10469813	0.469571
11737492	0.469886
161470	0.469969
455227	0.470077
92236337	0.470788
3006170	0.470788
92271256	0.471037
10357410	0.471064
10660621	0.471491
3011899	0.471527
14630157	0.47251
131853716	0.472532
6475236	0.473428
472814	0.473428
490625	0.473435
504747	0.473821
23545530	0.474044
44400589	0.47418
71262374	0.47418
5273019	0.474522
72212335	0.474727
14159235	0.474727
121486876	0.476194
387981	0.476453
10266777	0.476453
21157833	0.476663
454925	0.476798
93476651	0.477607
10019125	0.477607
3011897	0.477729
513632	0.477968
23616027	0.47803
44330586	0.47803
92209904	0.47803
21776949	0.47803
6245	0.47803
3007918	0.47803
92209902	0.47803
92846012	0.47803
9862222	0.478077
121578	0.478268
131855105	0.478511
131881061	0.478532
3067878	0.478558
513636	0.478611
9796412	0.478625
13566110	0.479093
42552658	0.4792
42552656	0.4792
11277569	0.479329
13922191	0.479883
29978508	0.479883
117810735	0.479883
92977577	0.479883
13922189	0.479883
9871558	0.479883
10859911	0.480178
97186	0.480603
46875292	0.480603
9881866	0.48093
280444	0.48093
189898	0.480972
167821	0.481161
44629858	0.481174
7048664	0.481174
124507746	0.481174
133688189	0.481174
688477	0.481174
17571993	0.481174
136260503	0.481267
11758878	0.481817
6482630	0.481915
193188	0.482078
490353	0.482179
491674	0.48267
72194	0.48267
359064	0.48267
92151285	0.48267
511670	0.483111
121487512	0.483111
86751195	0.483135
131708567	0.483249
131885779	0.483249
90472229	0.483412
451602	0.483604
134693115	0.483604
14312484	0.483604
5278282	0.484008
473280	0.484446
16760387	0.484581
16212026	0.484581
6175	0.484581
102602088	0.484581
121486971	0.484581
6603781	0.484581
121487027	0.484581
121487034	0.484581
160696	0.484581
12358851	0.484581
131701110	0.484581
6713582	0.484581
24729357	0.484581
5702244	0.484581
91142034	0.484581
596	0.484581
102601364	0.484581
67709179	0.484662
150851	0.484674
21122961	0.484674
29933626	0.484674
40544496	0.484674
44629873	0.484674
92268334	0.484674
3007908	0.484674
45358309	0.484674
3080719	0.485161
5273524	0.485161
175228	0.485224
21721736	0.486365
3083166	0.487074
6451079	0.488164
472637	0.488192
6480471	0.488307
76974604	0.488555
44396095	0.488778
21140838	0.488896
14806063	0.489009
196710	0.489009
6454537	0.489333
54192124	0.489333
121012732	0.489488
124528040	0.48949
21852781	0.490158
512658	0.490266
506143	0.490304
72968	0.490304
54069128	0.490332
91884695	0.490713
92043448	0.490713
65031	0.490713
76973301	0.490902
333691	0.490925
54041813	0.490925
21141083	0.491281
21732848	0.491601
22867782	0.491734
14702157	0.49211
473083	0.492203
71539312	0.492255
6483432	0.492336
15612862	0.49245
391266	0.493014
496474	0.493014
121427567	0.493278
11054511	0.493278
46705350	0.493278
13922196	0.493278
3461	0.493278
6093357	0.493278
45357852	0.493425
29924995	0.493425
490511	0.493506
6452137	0.493774
54260440	0.494208
71414969	0.494604
53322921	0.494752
9993207	0.49479
154701265	0.495706
326808	0.495839
44329981	0.495839
125507539	0.496216
353671	0.496431
131884918	0.496496
67841326	0.496546
67841222	0.496546
92253393	0.496623
92253390	0.496623
125124867	0.496623
14608008	0.496623
3007223	0.496673
135524757	0.496725
121487038	0.498898
100935585	0.498898
11749237	0.498953
510999	0.499553
136238397	0.499618
516072	0.500506
126915	0.500888
131858473	0.500936
11501773	0.50097
5272753	0.501607
3007224	0.501749
92258444	0.501875
10828395	0.501875
121487333	0.502301
92243788	0.502301
59048458	0.502615
469447	0.503142
92243924	0.503807
21144466	0.503807
121486913	0.503999
134694066	0.504224
29982328	0.504224
169662	0.504224
93604123	0.504224
44356940	0.504224
12042143	0.504224
92845691	0.504224
86288424	0.504314
470049	0.504394
465094	0.504394
139025281	0.504402
71315149	0.504402
7045516	0.504519
513124	0.504519
513122	0.504519
5894	0.504519
3010355	0.505946
57372617	0.506263
15024543	0.506966
25266884	0.507035
5278277	0.507493
49784203	0.508023
516074	0.508141
10405378	0.508539
90472732	0.508787
3007218	0.509222
131858474	0.509282
131885132	0.509539
14430336	0.509758
57348664	0.509881
21817599	0.509934
276394	0.509934
132663	0.509943
92270653	0.510106
500247	0.510106
86592812	0.510656
121596077	0.510714
59051498	0.511015
29980301	0.511015
20285	0.511015
46875049	0.511015
134694098	0.511015
16861	0.511015
12896821	0.511015
135511145	0.511184
472658	0.511345
472640	0.511345
6479521	0.511971
3010606	0.512019
498018	0.512166
25197	0.512268
240980	0.512268
515328	0.512268
60140908	0.512268
76973118	0.512546
44150017	0.51281
42607051	0.51281
15612873	0.514051
502232	0.514095
134067785	0.514697
490683	0.51473
490682	0.51473
3011895	0.515161
91927745	0.51528
14408976	0.515691
21144622	0.515716
5279426	0.516007
13009595	0.516191
5271785	0.516265
49784137	0.516286
92243975	0.516356
5273016	0.516411
324310	0.516411
475524	0.516475
461404	0.516475
16076142	0.516485
49849608	0.516494
455763	0.516606
512591	0.516984
510978	0.517065
270861	0.517068
470024	0.517068
14430375	0.517497
452097	0.517497
160067	0.517504
289971	0.518879
448403	0.518879
129862	0.518931
10264873	0.518935
13871050	0.519012
512601	0.519326
9942889	0.519382
15955042	0.519591
9562214	0.519747
92236380	0.519747
131876195	0.519747
516086	0.519761
51360252	0.519844
71380931	0.520219
510973	0.520251
490626	0.520501
464376	0.521143
451873	0.521221
67860541	0.521221
46780426	0.521395
133688245	0.521395
134481	0.521482
7308567	0.521482
67175601	0.521865
154809499	0.522162
54506098	0.522355
70684952	0.522383
96410	0.522383
72212535	0.522383
3009784	0.5231
9992803	0.52322
58463518	0.523349
131885191	0.523389
97119	0.52357
510971	0.523616
3039710	0.524065
57246734	0.524073
10849690	0.524073
9797705	0.524159
502229	0.524387
92242775	0.524413
3006169	0.524413
477413	0.524433
9842606	0.524828
121486815	0.524956
135618594	0.525019
56671903	0.525542
14806070	0.525708
6476927	0.525871
10037499	0.525879
59859763	0.525879
56995133	0.525879
29942411	0.525879
134694166	0.525879
67419448	0.525879
121606027	0.525988
11208563	0.526327
92243772	0.526527
21818173	0.526527
135618698	0.526763
135856077	0.526763
121486764	0.526914
493442	0.526983
159738	0.527434
46936923	0.527434
443234	0.527637
71317045	0.527894
11043124	0.528466
131881043	0.52847
25182693	0.528619
67358	0.528782
154731285	0.529317
100417	0.529546
21144431	0.529849
419564	0.529849
13830101	0.529888
128252	0.53006
21817596	0.530398
276398	0.530398
92237069	0.530398
131864833	0.530474
352989	0.530474
57357987	0.53069
21140332	0.53096
10999973	0.532062
127260544	0.532294
71407380	0.532294
16226669	0.532398
25796514	0.532398
59116124	0.532398
12358445	0.532398
7035901	0.532398
5901	0.532398
513034	0.5327
493439	0.532916
57368268	0.533111
14209054	0.533155
6482479	0.533155
97107236	0.533155
92978664	0.533155
452892	0.533803
3035491	0.533873
45039906	0.533873
93977460	0.533873
10615718	0.534587
12939904	0.534587
44316328	0.534604
500902	0.534604
92845515	0.534604
59844438	0.534604
13871033	0.534604
13871035	0.534604
60122232	0.534604
23519658	0.534735
97467	0.534756
277139	0.534756
92238006	0.534756
510972	0.535045
13566112	0.535482
54021277	0.535669
11010214	0.535685
506146	0.535693
86592813	0.535811
453757	0.535955
451961	0.535977
5272660	0.536057
21069732	0.5364
100935581	0.536681
151772	0.536681
21157436	0.536804
138113809	0.537202
127258181	0.537202
93055319	0.537416
23190	0.537416
12769724	0.537416
44386188	0.537416
121011847	0.537582
137195841	0.537601
13830104	0.537704
512291	0.537786
510983	0.537863
124156	0.537863
10017261	0.537863
516066	0.538042
6102683	0.538136
92043551	0.538208
126969140	0.538208
71772549	0.538208
512708	0.538905
54558447	0.538933
49784134	0.539547
12777819	0.539668
93515751	0.539668
11447886	0.539679
6332463	0.540236
49784438	0.540456
165148	0.540847
167877	0.540847
121487065	0.540847
121597152	0.540906
92237642	0.540906
97188	0.540906
97300838	0.541055
12940782	0.541135
191831	0.541135
6482480	0.541135
354916	0.541149
5278280	0.541336
100416	0.541507
65561	0.541531
5271378	0.541531
129389389	0.542039
516079	0.54205
516084	0.54205
21824454	0.542142
11057044	0.542397
121013684	0.542397
90472731	0.54272
512590	0.543329
21765584	0.54345
5273527	0.543466
6509777	0.54357
9835398	0.543662
3011893	0.543662
9878094	0.543746
49784136	0.544128
71761524	0.544233
14071470	0.544712
71229475	0.544832
25182694	0.544984
123262984	0.545191
3007215	0.545321
451911	0.545326
65269	0.545326
54171947	0.545331
351993	0.545331
131878455	0.545644
136041721	0.545992
21157388	0.546004
89495556	0.546217
7059437	0.546217
121487515	0.546217
18323	0.546217
10377200	0.546217
11064619	0.546217
7059439	0.546217
101384428	0.546217
46780471	0.546217
45356795	0.546217
6029	0.546217
643973	0.546217
121487529	0.546217
451603	0.546241
94842080	0.546241
57197621	0.546241
54669719	0.546241
21117608	0.546241
27556877	0.546241
688478	0.546241
352976	0.546241
151382	0.546241
101507	0.546241
121487114	0.546521
69906586	0.546586
91490554	0.546586
131849184	0.54659
21151277	0.546824
6708804	0.547067
1817	0.547067
92236674	0.547085
481528	0.547507
92245604	0.547587
13093729	0.547587
92245606	0.547587
136415743	0.547629
21732849	0.547691
92236455	0.54785
6474236	0.547854
133125648	0.547854
11130341	0.547946
21828013	0.548174
92249433	0.548944
10107793	0.548944
258592	0.549108
3007919	0.549425
137699672	0.549544
493223	0.549777
5278278	0.550155
10381436	0.550359
10015847	0.550573
513276	0.550741
155290824	0.551364
21121842	0.551933
67763123	0.552106
69886241	0.552106
13564810	0.552106
54336181	0.552267
21634250	0.552366
86592810	0.552416
154701266	0.552691
5273512	0.552919
21829242	0.553081
510948	0.553334
121486885	0.553457
21140569	0.553967
9824370	0.554309
53835662	0.55434
204132	0.554367
57377074	0.55446
4555041	0.554498
3010352	0.554583
511666	0.555091
6479393	0.555315
6475823	0.555504
131881305	0.555666
10859187	0.555768
13188940	0.555799
5272663	0.556302
139026027	0.556448
57369201	0.556448
3010797	0.556552
131708540	0.556554
70021591	0.556796
76973833	0.557036
511886	0.557164
14430355	0.557349
331904	0.557349
3011905	0.557786
96547	0.557906
6595777	0.557906
71407349	0.557914
15104857	0.557956
490310	0.558055
16076141	0.558427
282734	0.558464
22793986	0.558624
139592726	0.558912
137699081	0.558912
77844690	0.559212
124223956	0.559212
21140809	0.559234
15450939	0.559375
71539358	0.559553
45356917	0.559741
13066372	0.559741
9427	0.559741
1520351	0.559741
54669724	0.559741
13066370	0.559741
7059460	0.559741
450215	0.559741
101317	0.559741
44629859	0.559741
91872277	0.559741
44630766	0.559741
121486935	0.559758
14408979	0.559786
46780472	0.559832
90472260	0.559832
49849540	0.559832
15037959	0.55996
515217	0.559976
118855918	0.560077
124202892	0.560077
156587569	0.560128
6327750	0.560192
90674669	0.560234
640874	0.560509
13831580	0.560522
3010825	0.560722
44572473	0.560957
451874	0.561009
14185422	0.561009
54263300	0.56131
10355712	0.56131
129395379	0.561367
12803301	0.561367
12803302	0.561367
11121872	0.561505
176826	0.561577
456570	0.561617
156594560	0.561776
131848792	0.561886
94358774	0.561981
121010792	0.562025
133589974	0.562519
118855855	0.562524
11022827	0.562637
101343952	0.562693
510947	0.562917
5271296	0.562974
92286289	0.563025
512678	0.563288
13831293	0.563397
59783293	0.563434
40527693	0.563434
11821635	0.563434
96889965	0.563434
177273	0.563434
466420	0.563434
2305663	0.563434
905903	0.563434
11065470	0.563434
44240813	0.563434
13873708	0.563434
122619	0.563434
100253	0.563434
321729	0.563434
512718	0.563626
9881814	0.563892
23358719	0.563892
490684	0.56398
5272654	0.564042
21668257	0.564063
67853778	0.564254
11832095	0.564444
126567728	0.564502
501519	0.564614
135440057	0.564782
131888287	0.564828
11727150	0.565107
10778286	0.565565
76973510	0.566093
76973315	0.566093
11747043	0.566093
454531	0.5664
3008139	0.56642
446824	0.566458
4471889	0.566458
196709	0.566487
53463804	0.566487
17756793	0.56658
10878902	0.56658
46874484	0.56658
100016	0.56658
51380955	0.56658
92970665	0.567057
96622	0.567112
256040	0.567112
15839349	0.567112
86295119	0.567112
469074	0.567197
3007221	0.567527
92234642	0.567548
11725011	0.567748
71369906	0.567824
10266795	0.567828
156588427	0.568351
92279361	0.568432
639409	0.5685
148033	0.56891
5270727	0.569274
121221202	0.569503
451448	0.569558
162011	0.569558
452281	0.569627
20575885	0.569675
163320930	0.569819
136126104	0.570214
135409474	0.570214
15516021	0.570302
176869	0.57071
511885	0.570747
510979	0.571199
131885796	0.571227
21821194	0.571245
510982	0.571298
21820756	0.571718
92234054	0.571718
92237996	0.572159
14558097	0.572184
17756742	0.572386
15729467	0.572387
324452	0.572398
10065192	0.572681
92264741	0.572681
471865	0.572905
6531437	0.572905
93982631	0.573
3065118	0.57304
455182	0.573179
454533	0.573179
454534	0.573179
9570	0.573252
111261	0.573252
92223676	0.573252
23616817	0.573252
163947	0.573297
466039	0.573386
121486915	0.573413
11812423	0.573814
3080604	0.574461
604832	0.57513
14367013	0.575223
7282398	0.575223
118312477	0.575223
169704	0.575223
21824456	0.575223
7282400	0.575223
1265899	0.575223
452061	0.575307
14409039	0.575307
121486745	0.575427
126704	0.575432
469184	0.575432
131850520	0.575511
3010387	0.575604
50987538	0.575705
512719	0.575705
490433	0.575769
73478	0.575916
3010378	0.575968
92339825	0.575968
136592262	0.576309
24885222	0.576339
3010291	0.576393
512135	0.576637
92253117	0.576826
57358089	0.576826
92236430	0.57698
10467227	0.577082
14162719	0.577471
3081162	0.577471
162642336	0.577505
14730263	0.577559
135788877	0.578684
21821293	0.578808
69907861	0.578819
455180	0.578924
21145872	0.578924
10400774	0.578924
10445690	0.578924
14156718	0.578931
15119224	0.579078
129674064	0.579101
22880825	0.579155
481527	0.579228
156594202	0.579253
3011900	0.579406
9885936	0.579743
355033	0.579874
21826754	0.579908
92252368	0.579908
117647970	0.579938
53759423	0.579974
11849876	0.580019
134715452	0.580076
14310518	0.580106
14498611	0.580106
500903	0.580194
13830457	0.580194
137705912	0.580194
54180064	0.580334
23519662	0.580444
10849717	0.580479
278758	0.580524
21677555	0.580593
5273506	0.580701
59504000	0.580855
59504127	0.580855
59504108	0.580855
58463530	0.580894
6479205	0.581269
121486746	0.581271
452081	0.581448
163320836	0.581473
14102245	0.581473
54703164	0.581542
92299334	0.581542
54677885	0.581542
121487026	0.581641
5271786	0.581723
13712878	0.581732
478561	0.582059
92132205	0.582267
124428631	0.582267
27191376	0.582267
29982343	0.582267
107502	0.582267
45039580	0.582267
492409	0.582838
6334060	0.582891
10106801	0.582977
71346314	0.582977
45484443	0.583128
126567807	0.583669
92143143	0.583772
492408	0.583842
3082596	0.58423
18604151	0.584303
131884916	0.584417
10490949	0.584555
10705876	0.584555
95121	0.584574
23238948	0.584718
6334197	0.584921
131884919	0.585089
44438827	0.585223
196459	0.585345
5273015	0.585345
387072	0.585347
189148	0.585509
150619	0.585544
266482	0.585674
163285434	0.585693
22880806	0.585759
131843075	0.586422
21140290	0.586803
53792010	0.586934
21769885	0.586936
15172905	0.586974
57324057	0.587045
96851	0.587045
15172876	0.587247
92234638	0.587284
21139659	0.587284
46875748	0.58739
14978	0.58739
3007220	0.58739
92209900	0.58739
135519069	0.58763
135704021	0.58763
121487517	0.587695
135427250	0.588087
53775732	0.588259
3007909	0.588377
124565863	0.588401
58451159	0.588401
135405922	0.588504
135455558	0.588818
135459781	0.588818
481518	0.588895
14541163	0.588962
452054	0.588962
452051	0.588962
511984	0.589329
3010383	0.589378
15104850	0.589484
10977550	0.589739
44355029	0.590234
137176604	0.590373
57105083	0.590388
139025303	0.59068
46781591	0.59068
10563947	0.590707
126961829	0.590762
3010384	0.591248
92246004	0.591248
510946	0.591334
11173202	0.591449
56987376	0.591452
512137	0.591497
451365	0.591517
14308796	0.591517
122088	0.591517
21140410	0.591756
137795695	0.59211
132283239	0.59211
25185460	0.59211
129317616	0.59211
135600340	0.592174
136663945	0.592174
502244	0.5922
3006926	0.592533
91809617	0.592673
102339225	0.592879
137937484	0.593059
14061175	0.593059
5270589	0.593185
97297	0.593208
45039587	0.593208
25880707	0.593208
6419781	0.593208
5273750	0.593289
492407	0.5937
506144	0.593854
453994	0.593854
355900	0.593854
135625267	0.593868
7116198	0.593918
6561296	0.593918
7075199	0.593918
453689	0.594017
71374940	0.594082
14367015	0.594237
14367014	0.594237
11043123	0.594274
46876980	0.594274
464378	0.594342
510998	0.594539
6481831	0.595078
97454	0.595417
16747775	0.595593
10778285	0.596174
132073959	0.596174
89998825	0.596174
455669	0.596255
490432	0.596447
121487082	0.596507
121487083	0.596507
92268298	0.596715
92228261	0.596741
44451143	0.596741
97235	0.596809
92244157	0.596809
10833407	0.596942
97199	0.596945
512131	0.596945
446940	0.597008
5272744	0.597176
447069	0.597233
3011904	0.59728
71487589	0.597412
136250325	0.597663
71371890	0.597666
131844007	0.597773
98911	0.597775
135959544	0.59794
131875799	0.598185
688364	0.598313
111081	0.598313
482510	0.598344
129893514	0.598551
121486926	0.598819
470797	0.599103
391259	0.599103
10848780	0.599106
72195	0.599214
22027846	0.599214
510970	0.599264
501518	0.599388
512706	0.599492
22899187	0.59992
135771870	0.600033
11779374	0.600045
21140827	0.600356
91926387	0.600552
14999717	0.600615
92249436	0.600703
15613706	0.600703
9878327	0.600963
5272743	0.601232
131883949	0.60125
131858038	0.60125
92266557	0.60125
228966	0.601371
124301793	0.601371
13108042	0.60151
5272210	0.601513
25030767	0.601531
72182	0.601589
446658	0.60162
59180612	0.60178
76974600	0.601851
136236455	0.601976
71539360	0.602161
14409040	0.602282
130209	0.602684
472633	0.60287
122130429	0.603067
15119214	0.603232
10612861	0.603276
189108	0.603309
162660830	0.603362
6560416	0.60337
490438	0.603376
91483617	0.603958
57173805	0.604154
146674828	0.604424
44567065	0.60457
121487118	0.604814
54683691	0.604834
124526965	0.604888
57453626	0.604888
118703664	0.604888
58455422	0.604888
11311503	0.604888
118703665	0.604888
146014346	0.604888
122220071	0.604964
129437559	0.604978
22880800	0.605044
478563	0.605053
470030	0.605126
483941	0.605221
5287841	0.605318
21787858	0.605349
3005951	0.605395
482632	0.605528
466400	0.605591
3010388	0.605657
46875339	0.605657
92246571	0.605657
134229912	0.605898
135848702	0.606046
123993511	0.606085
137628662	0.606204
512136	0.606282
447192	0.606305
98575509	0.606827
40493564	0.606827
453168	0.606843
139267848	0.606918
139591931	0.606918
139267847	0.606918
139267828	0.606918
135692739	0.607061
14162717	0.607336
147839	0.607336
3032355	0.607391
3000603	0.607391
10334791	0.607469
71732376	0.607817
135410340	0.608033
135740163	0.608033
135453973	0.608033
150621	0.608076
11832583	0.608153
3037046	0.608319
3002879	0.60839
67228673	0.608412
22723869	0.608412
171555	0.60849
54531450	0.608525
23112639	0.608525
53678903	0.608677
513206	0.608944
137221145	0.609097
136842926	0.609097
144823459	0.609234
10778362	0.609286
11196409	0.609302
356796	0.609385
92236585	0.609438
261450	0.609438
92236583	0.609438
459890	0.609438
152488	0.610042
324745	0.610325
73662	0.610589
72200	0.610589
7204908	0.610589
44629931	0.610589
3010385	0.610653
3007126	0.610657
25231310	0.610721
10753744	0.610782
131882742	0.611187
495012	0.611196
11004885	0.611239
15742006	0.611264
369086	0.611305
131072	0.611305
10469019	0.611327
66906535	0.611433
845540	0.611508
11697484	0.611639
10400520	0.611892
21854430	0.612155
506145	0.61218
12799571	0.612192
98801	0.612197
92230795	0.612262
18661221	0.612262
69454489	0.612267
71744251	0.612267
11390847	0.612493
10264872	0.612516
53243689	0.612643
126968805	0.612759
139024751	0.612759
251784	0.612759
25728863	0.612759
7272023	0.612759
11276944	0.612759
118026092	0.612774
86306492	0.612802
71371189	0.612883
124428635	0.613031
92918	0.613031
97000	0.613031
7282382	0.613031
14135553	0.613031
490445	0.613169
102461643	0.613271
118294346	0.613329
500026	0.613489
101947567	0.613525
21677361	0.614121
452095	0.614156
14430353	0.614156
22875362	0.614172
21852786	0.614366
11507479	0.61453
3034423	0.61453
6595185	0.61453
676166	0.61453
512674	0.614611
135509485	0.614719
135511868	0.614719
136257804	0.614719
136843263	0.614719
137090331	0.614719
54256130	0.614912
513870	0.615264
6708818	0.615462
688121	0.615462
490037	0.615462
6256	0.615462
150628	0.615558
92231363	0.61598
29921448	0.61598
15612863	0.616119
136896502	0.616465
135453913	0.616465
10107866	0.616502
512604	0.616512
21817403	0.616538
92252780	0.616751
97692	0.616751
67113473	0.616985
21121840	0.617069
134004	0.617069
54339089	0.617154
355902	0.617259
453997	0.617259
9900206	0.617523
268421	0.618048
92245911	0.618048
97304120	0.618163
136674916	0.618339
117940991	0.618355
131881293	0.618478
110158190	0.618558
135600345	0.618814
21125843	0.618853
10491412	0.619065
117590597	0.619176
137699191	0.619191
138058736	0.619191
146160048	0.619191
137699364	0.619199
5272754	0.619561
15289165	0.619571
10107217	0.61965
11825687	0.619706
135410347	0.619711
135398550	0.619815
131885345	0.620264
451912	0.620381
121487449	0.621253
22880824	0.621511
11358266	0.621717
135463451	0.621737
131884920	0.621828
124345	0.621841
92286287	0.621841
121486830	0.621959
188276	0.622146
21769737	0.622202
98625	0.622209
44366461	0.622391
515085	0.622525
155905558	0.622637
134520771	0.622873
131850900	0.623305
155905580	0.623362
188350	0.623371
3012549	0.623787
2999329	0.623811
71435310	0.623834
54297338	0.623917
125734	0.623917
121487030	0.624051
133609839	0.624286
502242	0.624323
13989304	0.624453
131852043	0.624459
6481236	0.62453
57453628	0.62453
124223848	0.62453
44451208	0.624679
92229576	0.624679
136030678	0.624823
150669	0.624866
29921449	0.624972
512869	0.625023
92264349	0.625023
131858703	0.625285
5271015	0.625322
131881064	0.625392
92247204	0.625392
125503985	0.625403
512130	0.625489
102601363	0.625597
121216248	0.625634
121698	0.62568
13052734	0.62568
6713638	0.625927
4127885	0.625927
21677217	0.625927
73514	0.625927
92236327	0.625927
512707	0.626029
489849	0.626151
10063737	0.626724
9921551	0.626788
451890	0.626788
65102	0.626813
58834006	0.626813
21820463	0.626813
12800105	0.626813
135435173	0.626835
211875	0.626852
136195916	0.627129
121486862	0.627257
135422917	0.627539
15953881	0.627744
451915	0.627744
135616711	0.627921
101784714	0.627948
10782439	0.627972
13993514	0.627979
10198304	0.627979
135538642	0.628053
136076706	0.628053
135532713	0.628053
135538671	0.628053
135434940	0.628053
135415565	0.628053
135800807	0.628053
136854232	0.628053
135433837	0.628053
137274215	0.628053
136236459	0.628225
73651	0.62832
44308741	0.62832
490435	0.62832
137128749	0.628376
10611197	0.628552
14843513	0.62861
455179	0.628625
454528	0.628625
454530	0.628625
373953	0.628681
121228750	0.628902
102381563	0.628984
22885207	0.629092
10611929	0.62922
12358319	0.629241
512657	0.629299
71313037	0.6293
71776184	0.6293
121486927	0.629773
11032861	0.629774
13566115	0.629787
22880803	0.629833
73345328	0.629955
44146603	0.62997
46926326	0.630233
70385614	0.630327
267808	0.630699
14682078	0.630699
66649608	0.630834
21769748	0.630887
23629091	0.63093
13872084	0.631086
92237723	0.631113
21627890	0.631113
471486	0.631124
511669	0.63114
121487049	0.63114
490630	0.631262
58761796	0.631276
122707085	0.631601
297594	0.631601
451856	0.631616
14430362	0.631633
452096	0.631633
11065406	0.631648
92233963	0.631648
12137955	0.631648
3007920	0.631746
124715	0.631746
3006222	0.631746
121217034	0.631767
121487456	0.631844
15934097	0.631978
21829540	0.632041
135443731	0.632047
131884619	0.63217
125494152	0.632215
125494151	0.632215
135483941	0.632252
135483976	0.632252
139086336	0.632507
94725030	0.632767
92131953	0.632767
9816781	0.632767
92233339	0.632767
266234	0.632767
12800104	0.632767
58834035	0.632767
57061669	0.632767
94725032	0.632767
447594	0.632767
11032790	0.632767
84392	0.632767
3035929	0.632767
14191021	0.632913
135771852	0.633176
101339887	0.6332
102531168	0.6332
59504008	0.633282
59504149	0.633282
59504120	0.633282
21854120	0.63329
71337875	0.633439
71352385	0.633439
59252566	0.633798
131700647	0.633804
639614	0.633804
13941609	0.633819
128656	0.633823
92221238	0.633828
92221236	0.633828
134693227	0.633828
13870936	0.633869
6566064	0.633921
97480	0.633921
7099911	0.633921
18881	0.633921
23617998	0.633921
92161858	0.633952
271276	0.633952
24820718	0.633974
13188936	0.63409
171798	0.634116
150625	0.634191
92233380	0.634333
131881445	0.634333
136795196	0.63442
136670059	0.63442
451960	0.634438
121487106	0.634569
129787857	0.63459
456327	0.634747
461854	0.634747
456648	0.634747
146674673	0.634872
3006944	0.634971
493453	0.635011
131853290	0.635032
135921348	0.635075
121217041	0.635114
54343230	0.635367
131884262	0.635511
58078371	0.635708
121487074	0.636039
56961027	0.636129
3011894	0.636236
131880513	0.636321
90356982	0.63636
452090	0.636398
509522	0.636398
121486893	0.636427
11776820	0.636441
10041129	0.636884
5273013	0.637
29982346	0.637027
45039581	0.637027
11697766	0.637027
45052066	0.637029
156594694	0.637029
512705	0.637202
129561	0.637249
9813298	0.63725
10610233	0.637298
454870	0.63731
330407	0.637327
131881789	0.637327
5270525	0.63733
67566518	0.637707
11622526	0.637718
234984	0.637776
191626	0.637785
10357262	0.637845
21855714	0.637939
145681	0.637996
501517	0.638131
482589	0.638329
10019708	0.638331
92229125	0.638338
44451061	0.638338
167798	0.638368
56851256	0.638511
11097661	0.63853
296237	0.638751
155905982	0.638765
93982611	0.638871
135415644	0.639112
451554	0.639128
122174083	0.639152
45052344	0.639264
42637091	0.639534
495537	0.639686
44563542	0.63979
21627889	0.63993
122129480	0.639973
10105820	0.639986
163320923	0.640021
131851102	0.640046
135696522	0.640089
136045770	0.640089
135403914	0.640089
135812388	0.640089
135434786	0.640101
102063598	0.640205
71340337	0.640309
451616	0.640309
92209628	0.640318
7088272	0.640318
97577	0.640318
152521	0.640412
155903793	0.640601
3000303	0.640696
3000242	0.640696
595375	0.640715
90673985	0.640722
40506074	0.640796
3000824	0.640796
277822	0.640796
512178	0.640834
356732	0.640938
167321	0.640938
22211279	0.64118
124430633	0.641223
124430634	0.641223
54176875	0.641225
135504147	0.641252
175972	0.641254
15289164	0.641406
72212336	0.641406
11807674	0.641443
70889269	0.641607
644174	0.641607
6560357	0.641607
21704	0.641607
638036	0.641607
10890867	0.641607
5702004	0.641607
6420052	0.641607
447916	0.641607
121486812	0.641607
12358320	0.641607
12358321	0.641607
12358325	0.641607
453548	0.641607
448378	0.641607
53384930	0.641607
54732806	0.641607
7040251	0.641607
23279550	0.641607
139025871	0.641607
12358322	0.641607
160739	0.641607
191	0.641607
122130566	0.64176
54432316	0.641895
3034648	0.641897
3034638	0.641897
10923602	0.641925
10492175	0.641925
71442564	0.641925
11311566	0.642055
452612	0.642085
126283	0.642094
459903	0.642094
135410302	0.642122
20832934	0.642213
14464884	0.642271
259345	0.642613
511763	0.642661
51414401	0.642773
146108	0.642773
13831291	0.642773
22884229	0.642779
15955633	0.642795
121219141	0.642795
71342993	0.642804
71354368	0.642804
15410715	0.643234
11346304	0.643254
21580289	0.643392
11666177	0.643415
135465599	0.64344
135627705	0.64344
136062166	0.64344
135933068	0.64344
135622951	0.64344
136826947	0.64344
136065188	0.64344
54518623	0.643476
2729604	0.64351
94196	0.64351
7059462	0.64351
7195995	0.64351
68206315	0.64351
1263225	0.64351
27661670	0.64351
9992804	0.643614
6536767	0.643832
5273934	0.643832
21854434	0.643836
161583	0.643901
125654	0.64414
93258	0.64414
9992648	0.644284
7269451	0.644284
13887579	0.644284
107643	0.644284
92132277	0.644284
21825596	0.64431
87825371	0.64441
90663906	0.644423
512134	0.644642
92264929	0.644642
333596	0.644642
98581	0.644721
481523	0.644795
3005947	0.644821
3006523	0.644855
3006522	0.644855
21139907	0.64503
13833767	0.64503
259853	0.64503
121487089	0.64509
21456083	0.645467
3005950	0.645467
3358362	0.645763
44432644	0.645763
10377839	0.645784
197020	0.645784
76282776	0.645815
[truncated: 5,262 more rows]

## Sheet: 2. P. gingivalis
cid	Probability of Antimicrobial
483939	0.994999
130583	0.988032
449392	0.985219
3392033	0.985219
472167	0.98105
446725	0.977844
71440751	0.976652
121487093	0.972585
512675	0.972574
54089955	0.970971
135496375	0.970492
126968625	0.970062
57369656	0.970062
23421206	0.970062
92252177	0.967924
15160075	0.967162
512130	0.966687
5279534	0.966101
135743938	0.965942
483927	0.964758
22787949	0.964677
454121	0.963721
22841776	0.963336
6475886	0.962984
57369657	0.962661
101543	0.962661
515211	0.962085
121217776	0.961854
483922	0.961361
44560559	0.960628
483938	0.95946
18655749	0.959274
3005547	0.958851
483943	0.958534
1210964	0.957722
121217563	0.95764
101643824	0.957596
135921348	0.957488
54531183	0.956481
10125531	0.956481
124561689	0.956481
5273982	0.954639
5487206	0.953793
6440103	0.953019
453994	0.952472
355900	0.952472
515210	0.952436
121015029	0.951958
121006411	0.950794
22209968	0.950371
494218	0.950371
54192124	0.950082
6454537	0.950082
542606	0.949902
135483717	0.948953
135457959	0.948953
481528	0.948783
512633	0.948519
6479140	0.94825
7098661	0.947861
53774252	0.947773
6475885	0.947746
483934	0.947338
483941	0.946994
91926387	0.946847
10638005	0.946308
250899	0.945895
5274161	0.945722
5279532	0.944874
11580280	0.944729
137214373	0.944386
87208407	0.944253
6450917	0.944191
511377	0.943302
90673699	0.943199
72212336	0.943076
15289164	0.943076
3005551	0.943017
6992262	0.942998
483935	0.942552
54432316	0.942006
71371593	0.941822
66608846	0.941695
135439474	0.94085
3012549	0.940564
21852789	0.940486
355902	0.938971
453997	0.938971
121487327	0.938706
3012551	0.938044
511378	0.936648
6475798	0.936257
121487019	0.934543
90663906	0.934308
121487090	0.933574
137090731	0.933295
135538693	0.933242
134715452	0.933023
66535	0.932773
12308857	0.932773
57047691	0.932773
135625316	0.932739
3065118	0.932296
483937	0.931901
473280	0.931865
121486916	0.931765
512676	0.931711
6438459	0.931428
6450981	0.931428
135771870	0.931024
5279533	0.93039
512139	0.930273
44421198	0.930268
6479144	0.93024
6479145	0.93024
15509509	0.930086
135398701	0.929643
512727	0.929272
12994351	0.928004
135509071	0.927963
13989306	0.92718
575855	0.92718
512325	0.926532
516053	0.926398
512330	0.926342
473281	0.926318
3012564	0.926211
5271262	0.92607
136921547	0.925669
101926865	0.925134
133332	0.925133
20839332	0.925133
6439549	0.925133
3006522	0.924894
3006523	0.924894
512323	0.923854
6475928	0.923615
88146187	0.923615
136238399	0.923291
135511145	0.922851
455227	0.922772
483929	0.922763
20849148	0.922498
121487089	0.921901
6482246	0.921883
14376122	0.921499
71775556	0.921293
136025255	0.92117
483926	0.920931
391363	0.920903
477849	0.920903
490390	0.920567
483947	0.920325
492555	0.91997
135449322	0.919331
6479139	0.918064
129874	0.917149
131864317	0.916919
131886803	0.916558
90663555	0.916558
135462526	0.916294
44560429	0.916266
515212	0.916083
100222	0.915928
3009783	0.91591
136353600	0.91475
472173	0.914741
102602182	0.914484
483946	0.914391
494763	0.913602
3065115	0.913434
5270713	0.912772
470053	0.912685
483931	0.912569
121487874	0.912559
5270780	0.911967
121487118	0.911757
90470199	0.911734
466385	0.911631
90663546	0.911499
131886804	0.911499
6450927	0.911364
512673	0.910855
53909207	0.910855
135398596	0.910687
136259535	0.910687
136100249	0.910405
483923	0.910138
444920	0.909534
511014	0.909423
15928623	0.909064
12009657	0.9089
15868081	0.908034
511015	0.907954
121487519	0.907917
515111	0.907668
136041721	0.907606
6478357	0.90745
10978511	0.906855
455180	0.906845
10400774	0.906845
10445690	0.906845
21145872	0.906845
21788887	0.906702
6481577	0.906137
12067880	0.906131
121487459	0.906022
138375993	0.905688
492557	0.905587
455179	0.905294
454530	0.905294
454528	0.905294
473083	0.904859
514820	0.904858
121487537	0.904751
483945	0.904415
488244	0.90425
3012550	0.90407
102505730	0.903557
121486842	0.903411
3002126	0.903141
121487017	0.903101
24823119	0.9027
3067878	0.902597
54010782	0.902502
155889176	0.902487
135556930	0.902487
131858703	0.902143
136236455	0.901849
5273979	0.901724
196324	0.901435
10850176	0.90118
135538728	0.900982
483932	0.900707
10380149	0.900683
5274212	0.900668
13375937	0.900526
451882	0.900103
12787947	0.899895
6475332	0.899706
15928607	0.899406
512669	0.899029
6450926	0.899029
9838550	0.898933
6479900	0.89865
6475205	0.89865
469866	0.898416
15276822	0.898248
483924	0.897894
150624	0.897218
483936	0.897156
135405252	0.897066
136734671	0.897014
135412808	0.896879
11162398	0.896393
135616719	0.895941
454983	0.895312
6479133	0.895204
101245382	0.894879
135596626	0.894071
3006931	0.893718
15104850	0.893625
122631	0.893597
6483433	0.892924
481524	0.892798
6481582	0.892746
13566112	0.892543
3011931	0.892529
135398639	0.892432
18637700	0.892053
512329	0.891791
481519	0.891776
135422917	0.891415
376367	0.891221
515215	0.891011
136260091	0.890648
136682650	0.890648
69527463	0.890621
470800	0.890618
483942	0.890155
12009658	0.89012
135956774	0.889667
135446908	0.889346
510969	0.889128
135511063	0.888828
5273975	0.888506
44378767	0.888116
10067373	0.888113
481520	0.887951
121487870	0.887934
12810881	0.887919
129318779	0.88767
3065123	0.887455
92132405	0.887426
11778706	0.887426
69626224	0.887426
152475	0.886462
3080864	0.886384
23545530	0.88636
71621663	0.886332
136879425	0.886134
136242431	0.886097
3007223	0.886093
15954533	0.885707
5273977	0.885603
15954525	0.885285
92148590	0.885285
54235934	0.884662
136238397	0.884475
469095	0.884219
514817	0.884123
71371786	0.883731
174519	0.883731
10517505	0.883713
197610	0.883713
13941609	0.883556
135483941	0.883533
135483976	0.883533
454120	0.883504
135743990	0.883387
47002148	0.882681
136272490	0.882553
10466898	0.882499
135583322	0.882326
136226316	0.881982
128650	0.881982
178714	0.881982
469867	0.881925
365914	0.881925
163320932	0.881843
135420436	0.881843
496474	0.881821
391266	0.881821
451841	0.881242
451834	0.881242
2783869	0.881242
10849690	0.880776
57246734	0.880776
54446036	0.880239
150623	0.880193
73312146	0.880181
9994258	0.880136
6712985	0.880136
135743936	0.880039
139025680	0.879694
10389132	0.879694
15956150	0.879667
160418	0.879617
470797	0.87944
391259	0.87944
6481834	0.879201
121487869	0.878526
135441726	0.878369
5273980	0.878283
131853148	0.877719
13963301	0.877485
469771	0.877405
14411349	0.877405
191942	0.877221
481521	0.876686
44372621	0.876362
44421147	0.876362
136217926	0.876166
50989994	0.875121
3061100	0.875121
137287473	0.87449
5274169	0.874116
515083	0.873642
472166	0.873476
6475206	0.873476
6479898	0.873476
10378968	0.87344
470199	0.873202
135596618	0.872644
135764626	0.872331
13205980	0.872256
124396689	0.872256
53794255	0.872256
13205979	0.872256
483930	0.872143
135412763	0.871696
131693	0.871296
71761460	0.87126
5272908	0.871102
131884633	0.870848
21824451	0.870788
455217	0.870453
12799571	0.870431
12097726	0.870232
136272494	0.869953
135616717	0.869131
135926583	0.869131
469868	0.869053
365913	0.869053
54336181	0.868885
385457	0.868743
135823809	0.868689
512320	0.868607
196433	0.868233
135625266	0.868114
21677555	0.867983
494651	0.867839
363533	0.867839
352589	0.86751
3035986	0.867125
469869	0.866842
129126	0.866731
456203	0.866696
453081	0.865662
6479899	0.865645
470049	0.865587
465094	0.865587
7264506	0.865066
23421209	0.865066
479691	0.865031
15289165	0.865
5279530	0.864774
53657227	0.864515
512668	0.864263
6450920	0.864263
12097724	0.864068
102002581	0.863789
506146	0.863447
11346228	0.863225
10833407	0.86312
22881724	0.862592
139025758	0.862591
273749	0.862537
131875668	0.862537
5272658	0.862464
10730026	0.862415
10198943	0.862378
6479335	0.862326
196471	0.86224
153548	0.862069
131881293	0.861977
13989335	0.861931
13989334	0.861931
449489	0.861716
53940462	0.861163
6454581	0.860991
121217180	0.860717
3065117	0.860652
136768581	0.860478
131876403	0.860209
270261	0.860209
453631	0.859582
5272663	0.859315
135410347	0.859053
10332009	0.858789
21853094	0.85859
135778987	0.85794
135435172	0.85794
135753280	0.85794
135764690	0.85794
456109	0.857727
135517354	0.857445
154730315	0.856919
136161656	0.856175
131878839	0.856089
57354933	0.856089
136108872	0.856081
92231367	0.85558
18661222	0.85558
136387048	0.855224
3012258	0.855139
154726303	0.854724
22824722	0.854508
72736985	0.854046
22848660	0.853966
71761487	0.853635
136065590	0.853491
135437126	0.853491
9900206	0.853051
492556	0.852525
136020842	0.852262
91809617	0.85204
135457441	0.851988
151840	0.85182
11140051	0.851576
12097725	0.851527
121486746	0.850889
483933	0.850469
93036	0.850427
481527	0.850378
136592262	0.850354
135398630	0.850216
10021283	0.850143
46242340	0.849931
15590161	0.849912
10716626	0.849722
511984	0.84954
5273008	0.848851
53699095	0.848686
92246571	0.848442
3010388	0.848442
46875339	0.848442
121487298	0.848261
15788526	0.847854
42553078	0.847617
42553079	0.847617
136842757	0.847594
99692	0.847546
90487625	0.847385
494096	0.847278
92236670	0.847278
137191441	0.84724
195200	0.846979
160130	0.846954
469447	0.846826
15087558	0.846621
21140275	0.846559
3012563	0.846554
14258187	0.846542
3036202	0.846394
470796	0.846382
483921	0.84617
492200	0.846105
68768358	0.845784
126970070	0.845784
13989307	0.845434
515214	0.845236
72261	0.844709
5274367	0.844671
145710203	0.844228
5287614	0.844174
511016	0.843881
137202792	0.843852
9795471	0.843585
193091	0.842952
6505368	0.842737
134220	0.842737
6439649	0.842737
3011932	0.842727
121487428	0.842497
188216	0.842359
13871386	0.842128
136251916	0.842061
10685594	0.841895
6334737	0.841521
455411	0.841513
488237	0.84142
136236477	0.841383
54556091	0.841184
16721025	0.840919
56608890	0.840649
121011373	0.84063
9950702	0.840478
5278278	0.840469
16728337	0.840357
139026052	0.840351
135449281	0.840277
10399334	0.840241
10086464	0.840104
135625267	0.839858
72201	0.839715
14485380	0.839715
481518	0.839128
13940600	0.838913
121487889	0.838654
135538729	0.838569
10764891	0.838527
330549	0.838492
198689	0.838492
512136	0.838449
136434268	0.838393
512324	0.838346
135464489	0.838146
136134225	0.837983
136847919	0.837983
135398727	0.837983
121487283	0.837718
67327211	0.837528
54377788	0.837412
121218308	0.837067
5273973	0.836767
6334181	0.836657
192597	0.836526
136236459	0.835842
6858194	0.835612
135398597	0.835517
135596592	0.835517
66686600	0.835375
3011933	0.835265
475573	0.835127
14826108	0.834751
66931238	0.834597
136250325	0.833827
512678	0.833733
10659906	0.833629
90470680	0.833335
92233230	0.832771
54136175	0.832771
86592810	0.832745
167350	0.832546
18469116	0.832421
22094552	0.832421
3037732	0.832157
10333430	0.832078
506142	0.832032
151864	0.832032
107769	0.831879
14310518	0.831598
71420849	0.831577
169295	0.831511
5287615	0.831225
188575	0.830407
196507	0.830368
71621351	0.830245
6481833	0.830234
15957676	0.829917
512137	0.829684
3012255	0.829306
152162	0.829221
24776418	0.829002
54276168	0.828715
3012257	0.828472
140344780	0.828442
135771852	0.828308
121219148	0.82828
135400896	0.828125
3037127	0.828034
3010410	0.827618
16755631	0.827056
136157781	0.826925
135398593	0.826925
136069427	0.826925
135623679	0.826925
161605	0.826454
139025682	0.826392
131850900	0.826317
135427250	0.826297
191808	0.826296
121487464	0.825838
12193788	0.825838
53791036	0.8256
503109	0.825574
10612861	0.825126
121487492	0.824976
3005550	0.824818
6478372	0.824444
498022	0.824354
65148	0.8243
92245928	0.8243
73351959	0.824261
131871944	0.823927
121006824	0.823833
5279529	0.82376
11197465	0.823573
135740163	0.823527
135453973	0.823527
135410340	0.823527
135416123	0.822895
135538744	0.822866
136248812	0.821938
57105083	0.821784
59628352	0.821739
21140410	0.821264
10902616	0.820834
136229440	0.820333
5271699	0.820154
14826116	0.820024
135991622	0.819781
5273017	0.819484
6320191	0.819484
22791353	0.819289
9973143	0.819256
135849775	0.819041
135602240	0.819041
54561889	0.818978
453996	0.818944
92279160	0.818944
470030	0.818263
13831580	0.818258
76973301	0.818163
135538691	0.818074
3081517	0.817229
174373	0.816964
512128	0.816795
10684201	0.816627
131865335	0.816466
4304654	0.816415
494929	0.816415
511856	0.815151
511854	0.815151
6476965	0.815021
9841193	0.815021
45105016	0.814797
499786	0.814706
496020	0.814525
53653696	0.814161
5271821	0.813428
129864	0.813197
181830	0.813167
23519663	0.813039
10317833	0.812923
133121258	0.812923
126969944	0.812923
481523	0.81265
5272657	0.812632
318920	0.812571
137036988	0.812098
29921449	0.81193
3037684	0.811886
135541390	0.811846
118796809	0.811749
8642	0.811581
449405	0.811581
92241033	0.811507
15118691	0.811507
71761524	0.811392
136821128	0.811223
135920662	0.811223
135445750	0.811223
135897000	0.811223
137108250	0.811223
135897124	0.811223
3087115	0.811028
71317045	0.811018
477850	0.81092
121487353	0.810868
13051253	0.810868
3005964	0.810735
3036899	0.810668
126797	0.810564
54347690	0.810564
135412715	0.81042
162653200	0.810405
9996041	0.809904
258357	0.809747
131878904	0.809747
14862149	0.809593
139086336	0.809555
135600345	0.809459
471524	0.809348
6327750	0.809231
10092318	0.809102
65375	0.808666
5274292	0.808594
6435302	0.808531
512299	0.808531
6479191	0.808531
68012606	0.808459
490626	0.808448
3007912	0.808296
13922189	0.808216
13922191	0.808216
9871558	0.808216
92977577	0.808216
29978508	0.808216
117810735	0.808216
135482571	0.807621
136250551	0.807054
13566115	0.806685
5273014	0.806568
122130386	0.806508
137072542	0.806491
9840777	0.806191
14326905	0.806191
136190394	0.806143
11749237	0.806108
293725	0.806068
25075887	0.806068
92924	0.806037
125494351	0.806012
53759423	0.805941
10849479	0.805722
452445	0.805691
9881814	0.805592
23358719	0.805592
73478	0.805526
512717	0.805008
92264741	0.80498
10065192	0.80498
14826943	0.804956
5271958	0.804863
21677361	0.804801
24822457	0.8047
135596630	0.804632
137092996	0.804237
454132	0.803989
492034	0.803918
96547	0.803904
6595777	0.803904
511990	0.803791
135462273	0.803735
136791445	0.803606
24822456	0.803332
135443291	0.803301
9992803	0.803176
466039	0.802998
14776494	0.802896
22057571	0.802867
15689273	0.802867
125925	0.802867
506145	0.802842
452498	0.80247
21668257	0.802469
6398342	0.802195
483944	0.802125
6913097	0.80211
135692739	0.802109
135398640	0.801774
139025114	0.8016
131886802	0.801472
121007157	0.801472
136058528	0.801241
135849776	0.801155
156594560	0.800992
10037425	0.800961
125924	0.800961
146066	0.800501
53965369	0.800501
13205977	0.800252
53642991	0.800252
10467227	0.800167
135554439	0.799705
462380	0.799486
481517	0.799156
15124187	0.798961
124442842	0.798645
124442843	0.798645
21123822	0.798447
136265295	0.798156
135485495	0.798119
46846349	0.798027
10826879	0.797979
21853097	0.797838
136663945	0.79783
135600340	0.79783
3010386	0.797143
137198969	0.797077
10446782	0.796802
135783067	0.796567
162367444	0.796377
92243788	0.796235
121487333	0.796235
46780426	0.795846
133688245	0.795846
154809499	0.795663
3012256	0.795574
21140838	0.795523
510142	0.795402
10848780	0.794888
123789960	0.794817
3065116	0.794768
6479138	0.794717
511994	0.794717
6479137	0.794717
135492361	0.794658
136795137	0.794658
133395	0.794636
6439557	0.794636
10265594	0.794636
3009784	0.794599
514814	0.79423
10754975	0.793936
92242775	0.793733
3006169	0.793733
57351337	0.793646
121486980	0.793614
3012254	0.793287
3083166	0.792943
23724732	0.79294
92228821	0.79294
515103	0.792819
477548	0.792662
54112622	0.792556
124201	0.792523
53988721	0.792441
15991535	0.791905
9992804	0.791733
22880803	0.791675
125493863	0.791663
125493861	0.791663
137176536	0.791374
135602211	0.791374
254695	0.79105
3010383	0.791002
54109572	0.790782
21147181	0.790533
20279	0.790533
24867261	0.790533
135508096	0.790027
121487387	0.789602
455763	0.789378
136248813	0.789279
10893330	0.789011
54285617	0.788733
124296	0.788733
478559	0.788359
135511167	0.788173
135464488	0.788173
135404725	0.787991
71422332	0.78792
49779988	0.787675
90673692	0.787286
139025684	0.787238
146160877	0.787068
137239458	0.787068
10029973	0.786958
5272907	0.786727
139025107	0.786335
131852022	0.786226
136745025	0.786218
135406950	0.786218
136441961	0.786218
14630157	0.786205
92264929	0.786198
512134	0.786198
333596	0.786198
10266554	0.786189
135433627	0.786075
451837	0.785998
148744	0.785958
5274188	0.785846
163285680	0.78583
90176383	0.785627
15036533	0.785627
57097210	0.785627
46705350	0.785453
121427567	0.785453
3461	0.785453
11054511	0.785453
60750	0.785453
6093357	0.785453
13922196	0.785453
191599	0.785173
190030	0.785061
466018	0.785048
513122	0.784931
5894	0.784931
513124	0.784931
7045516	0.784931
515216	0.784848
54718171	0.784649
44829127	0.784597
5273750	0.784578
137179823	0.784219
121225517	0.784194
136643516	0.784188
146152	0.784087
512718	0.784071
10848525	0.784026
478563	0.783856
459895	0.783703
136240744	0.78365
3005552	0.783562
136020889	0.783498
11140845	0.783268
129350	0.783268
13989304	0.782917
149295	0.782788
6479135	0.782788
6440090	0.782788
158379	0.782588
454534	0.782353
454533	0.782353
455182	0.782353
9794951	0.782283
135407752	0.782168
7264507	0.781967
22803666	0.781967
94136	0.781967
71442569	0.781933
16133029	0.78177
5324587	0.781621
122130785	0.781581
89486751	0.781581
136260503	0.78152
5274208	0.781449
6478042	0.781306
152488	0.781293
172916	0.781254
163285627	0.781128
11278700	0.780845
131854439	0.780842
18658060	0.780819
9882903	0.780552
354624	0.780552
5274184	0.780311
5271259	0.779752
16219063	0.779634
68886	0.779634
44629987	0.779634
6603750	0.779634
688407	0.779634
446727	0.779634
6481583	0.779634
6921725	0.779634
3183	0.779634
5353599	0.779634
14581958	0.779354
14803227	0.779275
90674669	0.778911
480265	0.778777
131852023	0.778562
5272753	0.778435
10308414	0.778431
6450918	0.778082
135567131	0.777865
51571861	0.777633
25632117	0.777633
65050	0.777633
57113422	0.777633
135459382	0.77743
135616961	0.77743
136806576	0.77743
23391556	0.777335
100416	0.77731
9835200	0.777054
131853290	0.776919
15160057	0.776715
14367014	0.776361
14367015	0.776361
454925	0.776288
6481604	0.776285
89486753	0.776159
6602210	0.776125
483920	0.775862
147145	0.775842
71316819	0.775842
137274215	0.77581
135415565	0.77581
135434940	0.77581
135433837	0.77581
136854232	0.77581
136076706	0.77581
137100249	0.775698
121008681	0.775579
471523	0.775518
146503834	0.775382
4369196	0.775286
11369660	0.77525
10379132	0.775214
92230795	0.775055
18661221	0.775055
129735822	0.774511
136238394	0.774396
12081433	0.774116
10923198	0.773846
163285378	0.773805
6857539	0.773453
92271314	0.773453
10661693	0.773426
5270502	0.773426
54309519	0.773255
97184	0.773255
266223	0.773255
71352407	0.773219
3081042	0.773219
4269332	0.773167
3034646	0.773167
10849857	0.773157
481530	0.773024
135423946	0.772957
88101259	0.772752
171490	0.772462
121006761	0.772258
135459780	0.772255
456904	0.772174
5272752	0.772134
490630	0.771862
512674	0.77144
13188940	0.771122
3081471	0.770988
575859	0.770929
56612070	0.770748
515213	0.770505
21855041	0.770218
14159235	0.770165
72212335	0.770165
121487476	0.769829
127258203	0.769624
481522	0.769517
15276896	0.769315
150973	0.769113
138375991	0.769091
145710714	0.769045
512291	0.76897
56609687	0.768807
54683691	0.768743
121006713	0.768444
10106291	0.768333
3035490	0.768308
71351190	0.768252
5274366	0.768203
160598	0.768056
127259583	0.768018
57269864	0.767954
13477311	0.767954
71315467	0.767954
11579992	0.767954
473278	0.767954
5270525	0.767901
20646474	0.767787
330407	0.767708
131881789	0.767708
514803	0.767707
73479	0.7677
6482245	0.767657
54370573	0.767335
135405922	0.767297
163888	0.767273
22880806	0.767267
136257920	0.76723
5270727	0.76708
135403914	0.767014
135812388	0.767014
136045770	0.767014
135696522	0.767014
477551	0.766986
71404160	0.766832
136228650	0.766611
3012253	0.766597
452097	0.766593
14430375	0.766593
9951889	0.766399
516467	0.766381
5271959	0.765777
137128751	0.765734
54021318	0.765631
13871382	0.765631
124297	0.765332
58696770	0.765332
13647253	0.765332
50313	0.765332
656409	0.765332
121007158	0.765312
10492375	0.765228
5272906	0.765211
53962626	0.764953
125691	0.764476
14539818	0.764348
14331714	0.764339
71387182	0.764326
18658061	0.763901
53901126	0.76384
150625	0.763712
174657	0.763549
13566110	0.7634
174743	0.763306
10933976	0.763293
5289071	0.763277
136385771	0.763146
135434782	0.763116
86751121	0.763029
135618545	0.762518
137204795	0.762463
131883224	0.762443
446658	0.762126
135521334	0.762072
136817853	0.762072
444146	0.76183
10732949	0.761522
136238529	0.761366
137139937	0.761181
6419973	0.761103
51371334	0.761103
511644	0.761103
5905	0.761103
107764	0.761103
1272916	0.761103
179629	0.761103
66760234	0.76075
13009364	0.760343
1265899	0.759819
21824456	0.759819
7282400	0.759819
14367013	0.759819
7282398	0.759819
169704	0.759819
118312477	0.759819
5274204	0.759735
136921541	0.759551
125494577	0.759417
135508837	0.759292
514811	0.759264
137105585	0.759163
22895138	0.759081
489881	0.759004
163947	0.75868
136623053	0.758675
12497373	0.758666
250904	0.758666
3080744	0.758478
56977943	0.758438
454531	0.758319
15609009	0.757936
15934098	0.75773
121487531	0.75769
137139924	0.757428
162367439	0.757424
22856727	0.757424
135742144	0.757297
466022	0.757248
136195916	0.757134
137195854	0.757049
139025685	0.756841
135435111	0.756777
6479143	0.756681
136801906	0.756585
453764	0.756561
135542427	0.756527
125508952	0.756258
4102969	0.756125
10236751	0.756125
136265296	0.755474
506144	0.755253
136644173	0.755229
11758878	0.755193
136628879	0.75518
121216426	0.755126
135582772	0.75501
169716	0.754957
6481830	0.754957
22811380	0.754957
11380753	0.754952
14284094	0.754783
135453910	0.754367
163284925	0.754236
470801	0.754104
92132221	0.753932
134693185	0.753932
12873547	0.753932
6451965	0.753932
129889465	0.753732
69630326	0.753615
9816508	0.753453
10753744	0.753422
512135	0.753367
490629	0.753121
135450796	0.752956
136835831	0.752936
135402018	0.752936
135403804	0.752936
135742137	0.752936
135398592	0.752936
135544549	0.752936
137015000	0.752855
481516	0.752812
21139854	0.75263
92236279	0.75263
9992006	0.752515
22859454	0.752505
506492	0.752438
14367012	0.752428
135398631	0.752067
137208277	0.752067
15612801	0.752036
122521211	0.752036
131887892	0.752009
136232982	0.751804
18596452	0.751235
490256	0.750947
516074	0.750878
472175	0.750842
25796482	0.750842
86308410	0.750842
13927	0.750842
23519675	0.75067
469094	0.750393
15277413	0.750369
21140573	0.750012
3009782	0.749901
10708101	0.749823
137346607	0.749579
100327	0.749552
324309	0.749552
131882935	0.749387
58859108	0.749292
472172	0.749292
89341487	0.749292
122879	0.749292
21157388	0.749178
125494510	0.749037
121486825	0.748829
453832	0.748828
5274165	0.748803
56634843	0.748646
10467582	0.748544
160283	0.748494
135401003	0.748225
21634414	0.747569
137184934	0.747268
90732286	0.747239
6479148	0.74721
13831293	0.747008
510968	0.746529
6441877	0.746068
135527049	0.745894
136219930	0.745843
5272754	0.745736
15059928	0.745661
131879863	0.745557
301080	0.745557
3007771	0.745517
136205846	0.744834
22451350	0.744628
451503	0.744628
10658983	0.74451
135502924	0.744454
163285353	0.74439
11208805	0.744334
135443731	0.743853
503020	0.743835
6320414	0.743815
136273848	0.743692
451896	0.743598
135538673	0.743521
12150481	0.743389
136633725	0.743328
131858176	0.743225
125895	0.742938
15087556	0.742938
45105015	0.742574
121009003	0.742449
10491412	0.742439
135408506	0.74238
135763231	0.74238
135434851	0.742342
135509108	0.742142
136219928	0.741869
135398508	0.741869
137303707	0.741869
135546504	0.741869
136217872	0.741869
135742598	0.741869
10827042	0.741815
14484797	0.741441
6449933	0.741292
6482243	0.741292
5461897	0.741292
136176852	0.741205
359064	0.740775
72194	0.740775
491674	0.740775
92151285	0.740775
467291	0.740716
454138	0.740606
454139	0.740606
3000603	0.7406
3032355	0.7406
135515425	0.74031
10040688	0.740065
456648	0.739921
456327	0.739921
461854	0.739921
169938	0.739889
5271380	0.739859
124295	0.739859
469086	0.739698
515102	0.739452
121487343	0.739359
121487344	0.739359
453168	0.739288
498376	0.739106
12150479	0.738879
5270571	0.738879
16748010	0.738879
5271379	0.738879
124294	0.738879
133458	0.738836
10357410	0.738504
6479136	0.738407
135856015	0.738116
5271819	0.738037
11346304	0.737793
92286289	0.737618
15938965	0.737538
1549370	0.737538
172391	0.737297
5276640	0.737297
102057561	0.736294
135435173	0.736093
131698258	0.735797
50312	0.735797
5276642	0.735797
469809	0.73572
5099290	0.735684
71374245	0.735593
512172	0.735235
511997	0.734928
124466	0.734727
5276957	0.734634
21824454	0.734611
172392	0.734606
5276641	0.734606
10040433	0.734596
5271807	0.734494
150856	0.734348
121217181	0.734343
14410899	0.734106
135410303	0.734013
504734	0.733942
3008584	0.733829
5273015	0.73341
5280127	0.73335
147146	0.732857
137195841	0.732728
135498235	0.7327
135484985	0.7327
135410269	0.7327
12599	0.732582
6481845	0.732435
121487532	0.732369
12071879	0.732162
6714006	0.732162
360646	0.73211
493225	0.73211
3009858	0.73211
100652	0.731812
137128750	0.731729
135625314	0.731484
11186205	0.731324
455171	0.731206
21145867	0.731206
135524757	0.731134
14862330	0.731069
13188936	0.730993
135460966	0.730839
136927403	0.730839
135625234	0.730839
131875801	0.730794
164891	0.73069
72217	0.730207
451375	0.73016
511887	0.730109
439866	0.730033
4477522	0.730033
6478491	0.73002
136843263	0.729649
137090331	0.729649
135511868	0.729649
136257804	0.729649
135509485	0.729649
3005554	0.729508
3371855	0.729503
59728433	0.729503
14483474	0.729503
454140	0.729379
454141	0.729379
136921545	0.72922
514805	0.729155
22861866	0.72879
511719	0.72858
10405378	0.728309
155395	0.728047
274083	0.727732
97381	0.727732
131843750	0.727689
5271695	0.72755
13871387	0.72743
71317010	0.72728
44316739	0.72728
512322	0.72728
99529	0.727152
315092	0.727152
516066	0.727077
15954436	0.726986
54424807	0.726729
91668407	0.72665
135440620	0.726127
93977460	0.726106
3035491	0.726106
45039906	0.726106
512005	0.725784
514810	0.725761
136186017	0.725502
135435044	0.725502
5274087	0.725428
101670692	0.725346
136232092	0.725059
135856077	0.72469
135618698	0.72469
15081828	0.724549
452061	0.724498
14409039	0.724498
5273004	0.724497
3012586	0.72429
25266884	0.724287
3007224	0.72417
5270689	0.724002
131881311	0.723902
97119	0.723856
5271378	0.723678
65561	0.723678
11425350	0.723641
54351187	0.723598
91668349	0.72358
477950	0.723274
10565387	0.722939
87824027	0.722926
296233	0.722926
474355	0.722865
6333525	0.722603
54359085	0.722541
136734354	0.72209
14156718	0.721776
129291491	0.721751
137139936	0.721739
59628308	0.721709
76973118	0.720738
449599	0.720523
5494430	0.720482
88518334	0.720352
11436669	0.720146
136674918	0.719824
483948	0.719664
128757	0.719661
5276958	0.719488
20871287	0.719416
10517504	0.719348
121008097	0.719341
135453913	0.719097
136896502	0.719097
14260256	0.718938
162660830	0.718495
470067	0.718263
92529429	0.717813
92132144	0.717813
100802	0.717813
477853	0.71776
21117616	0.717694
5273749	0.717421
5271377	0.717421
125494151	0.717294
125494152	0.717294
6439573	0.716814
92236137	0.716803
131846804	0.716803
92236135	0.716803
265574	0.716803
358959	0.716616
136118471	0.71659
460466	0.71642
150201	0.716306
6440124	0.716306
6438371	0.716306
11057044	0.716292
121013684	0.716292
14842983	0.716286
3010291	0.716265
23519664	0.715881
90954505	0.715581
23421207	0.715531
137147094	0.715507
454001	0.715314
135467705	0.715164
438430	0.714995
145681	0.714803
133135	0.714643
70818775	0.714485
512707	0.714147
10946143	0.714033
512658	0.713966
191215	0.713908
511720	0.713899
53741175	0.713353
454142	0.712989
11098172	0.712924
10403633	0.712729
135538674	0.712656
15938966	0.712629
7065210	0.71257
21116879	0.71257
93003	0.71257
44629860	0.71257
71302592	0.712221
452096	0.711791
14430362	0.711791
131882637	0.711584
494217	0.711584
132274323	0.710986
3007123	0.710584
135434850	0.710427
135465599	0.710358
135622951	0.710358
135933068	0.710358
135627705	0.710358
136826947	0.710358
136065188	0.710358
136062166	0.710358
131848792	0.710261
151790	0.710047
6035	0.710046
6603739	0.710046
7195999	0.710046
2729613	0.710046
453762	0.709652
101075208	0.709639
135596554	0.708358
131882742	0.708301
23363310	0.707968
128866	0.707958
135398550	0.707939
135962086	0.707922
121486895	0.707738
138375992	0.707731
86645125	0.707602
121486756	0.707516
137099057	0.707114
6450919	0.70661
3081452	0.706441
139592726	0.706301
137699081	0.706301
136744872	0.706187
10541096	0.705772
46846348	0.705574
516466	0.705352
268420	0.7049
672230	0.7049
64975	0.7049
480247	0.704823
136232990	0.704527
121487526	0.704201
135764598	0.703595
11630346	0.7035
135518167	0.703437
136234097	0.703437
317398	0.703247
102213	0.703247
21856241	0.703247
58521221	0.703247
92136273	0.703247
124789650	0.703247
451817	0.703243
465413	0.703243
97300904	0.703239
451451	0.703012
14654332	0.703012
446940	0.702594
71776864	0.701792
135704021	0.701507
135519069	0.701507
12313774	0.7014
92751	0.7014
4661673	0.701354
71406419	0.701293
335400	0.700888
92264935	0.700888
507269	0.700888
3010374	0.700869
5278277	0.70077
21824453	0.700408
11746791	0.700306
150667	0.700261
101039156	0.700244
162641872	0.700211
129893514	0.700202
10474045	0.700032
3007124	0.699947
98854	0.699934
21140449	0.699934
92247230	0.699934
196676	0.699662
6481836	0.699648
136088507	0.699292
5274310	0.699108
121216232	0.698926
21829540	0.69889
129678678	0.698277
477852	0.698128
71374323	0.697845
16728571	0.697806
6602111	0.697563
13009312	0.697563
73265308	0.697563
147569	0.697563
92132157	0.697563
90488943	0.697563
462388	0.697528
77282269	0.697347
484808	0.697343
6560187	0.697308
25886830	0.697308
65085	0.697308
127258181	0.696231
138113809	0.696231
100938413	0.696229
6102683	0.696211
453820	0.695952
496427	0.695927
10922291	0.695786
98315	0.695786
121220862	0.695662
193541	0.695638
6475470	0.695343
135538026	0.695324
125507522	0.695295
159285	0.695282
22899187	0.694834
484807	0.694647
137176604	0.694377
172915	0.694305
135409474	0.694123
136126104	0.694123
5274144	0.69409
512004	0.693462
135447001	0.693405
25880707	0.693373
97297	0.693373
6419781	0.693373
45039587	0.693373
14503364	0.693145
71407741	0.692864
44266030	0.692767
439693	0.692767
134694916	0.692767
138375984	0.692707
452892	0.692698
15747441	0.691843
126567728	0.691816
135421231	0.691756
15403938	0.691556
67358	0.691344
12151656	0.691066
16666490	0.691039
122130879	0.690688
6480473	0.690174
92248239	0.68979
3007125	0.68965
195909	0.689622
11777114	0.689497
15957673	0.689437
125167	0.68925
14039728	0.68925
504751	0.689105
5278282	0.689084
121486862	0.688851
11219149	0.688719
135407854	0.688528
510999	0.688522
503813	0.688188
511017	0.688045
15955633	0.687775
121219141	0.687775
444919	0.687728
9700	0.687728
25113134	0.687728
10687208	0.687728
135538692	0.687534
92243772	0.687442
21818173	0.687442
9861379	0.68681
6481569	0.686796
135538696	0.686526
135816739	0.686331
135480588	0.686027
498020	0.685264
121486764	0.68522
10471224	0.685045
21139599	0.684895
68655403	0.684756
131882875	0.684437
316992	0.684437
136183881	0.684339
1778309	0.684175
16080049	0.684051
121487457	0.683724
148264	0.683303
23616221	0.68328
71368152	0.683244
171255	0.683169
22885208	0.683165
136270374	0.683159
369086	0.68313
131072	0.68313
90474928	0.682985
5273510	0.682662
44366461	0.682635
493439	0.682604
7058165	0.682556
5273016	0.682443
121596082	0.682222
90673693	0.682105
139025115	0.681981
21767591	0.68178
21676639	0.681254
5272659	0.680954
125014	0.680913
3005965	0.680589
6479188	0.680551
6439190	0.680551
70833226	0.680414
21854783	0.680414
118705336	0.680413
54023955	0.680345
401060	0.680311
495034	0.680307
136227111	0.680127
135482132	0.680124
137221138	0.679447
135434784	0.679447
467294	0.679443
11507479	0.679394
676166	0.679394
3034423	0.679394
6595185	0.679394
23421442	0.679284
131877129	0.678988
66599986	0.678944
131883271	0.678827
156594985	0.678715
6483431	0.678566
138114911	0.678566
125544	0.678551
194102	0.678548
135463029	0.678489
419564	0.678342
21144431	0.678342
9834501	0.678286
265025	0.678286
10956375	0.678254
13831089	0.678254
41097849	0.678254
51403981	0.678254
65510	0.678254
351382	0.678254
71314711	0.678254
6595184	0.67823
7043952	0.67823
71749030	0.678167
514812	0.678167
22873853	0.677931
131843751	0.677899
451522	0.677746
476406	0.677746
72213	0.677746
361921	0.677746
54703164	0.677687
92299334	0.677687
54677885	0.677687
135854977	0.677586
136842861	0.677586
449584	0.677166
11054122	0.677096
92266369	0.677005
92266371	0.677005
131878800	0.677005
3012252	0.676958
23279551	0.676941
444450	0.676908
149099	0.676767
131801285	0.676557
513636	0.676547
10586962	0.676468
6438736	0.676226
90472725	0.676195
469861	0.675822
137167219	0.675791
136663933	0.675791
136756019	0.675791
6338568	0.675743
490628	0.675689
139025646	0.67563
130060	0.675398
452893	0.675211
137249367	0.675045
71309464	0.674992
5272665	0.674728
155290824	0.674686
14445949	0.674557
153436042	0.674557
11779021	0.674532
71374221	0.674322
12800102	0.674173
3035760	0.674141
15693167	0.674021
136808318	0.674017
15928745	0.674017
6481567	0.674008
136229819	0.673904
121486748	0.673761
3081384	0.67374
176869	0.673653
3037219	0.673217
10915407	0.673137
10707449	0.672985
488245	0.672914
23541118	0.672889
54555880	0.672771
91524621	0.672719
6478358	0.672596
121486905	0.672537
22209663	0.672442
45357259	0.672442
59891165	0.672442
7059421	0.672442
13730	0.672442
489519	0.672442
72246	0.672442
320414	0.672089
54100215	0.672089
54213197	0.671982
512679	0.671779
135416725	0.671505
100795272	0.671335
137077012	0.671307
10778286	0.671218
136674916	0.67101
10610233	0.670869
98581	0.670631
71421157	0.670357
54297338	0.670276
125734	0.670276
439424	0.670246
71621353	0.670171
9904475	0.6698
6474236	0.669561
133125648	0.669561
14862102	0.669302
135849075	0.669228
91927745	0.669092
71340416	0.669086
135547062	0.669036
37542	0.668968
490511	0.668968
6918133	0.668895
73323	0.668848
1190	0.668848
122280	0.668848
14803551	0.668833
131857684	0.668687
23253577	0.668652
90117986	0.668584
66802809	0.668542
136666654	0.668249
10945668	0.668224
105116	0.668224
374904	0.668219
70365165	0.668219
149098	0.668148
135804809	0.668011
477552	0.667977
135708260	0.667807
135407175	0.667807
136006897	0.667807
131884455	0.667439
102152336	0.667309
54443874	0.66631
135914512	0.665769
137295291	0.665769
135768164	0.665769
135398641	0.665769
135403801	0.665769
11728978	0.665743
162640537	0.665479
10019998	0.665471
452132	0.665293
121486739	0.665266
92248971	0.66484
11129803	0.664604
453629	0.664545
136190395	0.664314
135800809	0.664111
136176844	0.664111
163285626	0.663962
451895	0.66368
136119103	0.663395
11565302	0.662974
100253	0.662698
466420	0.662698
96889965	0.662698
177273	0.662698
44240813	0.662698
11065470	0.662698
321729	0.662698
59783293	0.662698
5271953	0.662535
118294346	0.662409
146013455	0.662175
5274088	0.661736
455839	0.661667
132663	0.66153
135583321	0.661403
156588427	0.661346
466426	0.660728
14654364	0.660728
136842926	0.660634
137221145	0.660634
121486765	0.660563
21852781	0.660543
76973875	0.660392
234984	0.6595
65095	0.659336
135511113	0.659297
5272848	0.65922
10826877	0.658924
71413190	0.658907
452213	0.65889
473366	0.65889
54008737	0.658783
135406997	0.658696
65372	0.65857
11808175	0.658558
11832914	0.658558
11087275	0.658558
482505	0.658558
[truncated: 4,870 more rows]

## Sheet: x. Hydrogel
cid	Prediction probability of gelators
445132	0.683304
92252368	0.680242
21826754	0.680242
131876227	0.676372
293725	0.659722
25075887	0.659722
25075886	0.653404
137202792	0.650511
6323540	0.646697
5698	0.646697
136927403	0.645969
135625234	0.645969
135460966	0.645969
3036471	0.645817
1190	0.643081
73323	0.643081
122280	0.643081
5271259	0.64107
448231	0.63979
135567131	0.638088
54235934	0.637126
45052491	0.637012
448782	0.637012
54237496	0.637012
3081517	0.636554
150959	0.634255
92264349	0.63371
512869	0.63371
145681	0.63362
169295	0.633139
439424	0.633
515216	0.631362
440416	0.630724
91669385	0.63011
3081384	0.629858
16721025	0.629674
54443874	0.62962
150856	0.628601
136229819	0.627974
8642	0.627878
449405	0.627878
188276	0.627135
71374245	0.627031
10859187	0.62523
499785	0.624533
20584074	0.624511
3082183	0.624511
15276861	0.624341
136025255	0.623728
26974701	0.623629
15956150	0.623564
77280370	0.622659
135554439	0.621897
53657227	0.621848
137699365	0.621764
3035986	0.621752
173266	0.621367
77518952	0.620726
21122981	0.620156
163285485	0.620156
539847	0.620039
10308414	0.619982
10402220	0.619765
125224	0.619689
16755631	0.61956
6481845	0.619027
45052555	0.618885
71371786	0.618844
174519	0.618844
10492375	0.618825
6333525	0.618484
92228821	0.618452
23724732	0.618452
171255	0.618369
503020	0.618348
10687208	0.618093
9700	0.618093
444919	0.618093
25113134	0.618093
488242	0.617839
451844	0.617804
13989276	0.617804
135464486	0.617745
65063	0.617543
14803227	0.617311
196324	0.617185
71351190	0.616792
45052344	0.616422
164933	0.615565
20832934	0.615422
54136175	0.614869
92233230	0.614869
444281	0.613982
4555041	0.613855
193604	0.613368
10424498	0.613229
150621	0.613061
139025117	0.613007
6560138	0.613007
64959	0.613007
92242756	0.61286
21765593	0.61286
5289071	0.612825
125739	0.612781
135509071	0.61262
4369196	0.612597
25049744	0.612421
376367	0.6123
135398701	0.612266
18658061	0.612083
146674821	0.611975
45051593	0.611791
5272849	0.611762
89486753	0.611459
13832344	0.611354
11065431	0.611046
65372	0.610825
488243	0.610455
495034	0.610258
135398631	0.610094
137015000	0.610094
136238529	0.610094
163284925	0.610094
137208277	0.610094
515111	0.609759
5319815	0.60951
45051931	0.60942
93036	0.609172
125495767	0.609171
129391409	0.609171
135464489	0.609127
188215	0.609081
156594227	0.608969
156594089	0.608861
13248213	0.60873
13248214	0.60873
54089955	0.608715
71628825	0.608522
68517003	0.60851
71402186	0.608483
46705354	0.608334
6030	0.608258
71752893	0.608258
25074417	0.608258
90469779	0.608258
44403842	0.60813
71302534	0.60813
156594990	0.60813
45039260	0.60813
12803287	0.607959
14842998	0.607891
18658060	0.607884
121487517	0.607621
101609	0.607524
145710203	0.607416
156594224	0.60737
71410159	0.607095
76844781	0.606911
15954436	0.606753
13042007	0.606569
191942	0.6065
129678678	0.606483
18596452	0.60638
77520054	0.60633
451393	0.606062
5496661	0.606018
121487445	0.605984
5289468	0.605923
5273010	0.605923
45038843	0.605923
3605363	0.605923
6320189	0.605923
324452	0.60589
452265	0.605736
121217563	0.605663
475377	0.605588
9943091	0.60539
358959	0.605342
288008	0.605315
98561	0.605315
451843	0.605083
5272826	0.605064
130510	0.604944
6398342	0.604811
21824451	0.604409
135616719	0.60422
71749595	0.604186
512735	0.604186
189213	0.604186
163320930	0.604156
446164	0.604132
54351187	0.604103
477551	0.604076
45074656	0.603882
5271262	0.603589
91827907	0.603418
13989277	0.603299
451370	0.603299
126968805	0.603279
11276944	0.603279
139024751	0.603279
251784	0.603279
25728863	0.603279
7272023	0.603279
53837746	0.603203
376225	0.60294
10466304	0.602853
587457	0.602853
135618545	0.602744
164580	0.602295
6334744	0.602223
54010782	0.602177
131852022	0.601924
135625322	0.601736
135602243	0.601736
111081	0.601684
688364	0.601684
76845172	0.601667
150973	0.601587
488247	0.601395
189893	0.601395
121487129	0.601395
150625	0.601374
5273981	0.60136
76844800	0.60133
121487343	0.60133
121487344	0.60133
77461390	0.601302
452065	0.601208
449489	0.601208
13989274	0.601036
451369	0.601036
130601	0.600946
6426866	0.600946
6426865	0.600946
69640684	0.60093
76844801	0.600748
121216232	0.600548
135528754	0.600455
315092	0.600452
99529	0.600452
489670	0.600278
44151925	0.600105
45052066	0.600097
156594694	0.600097
167798	0.600029
15160057	0.599948
121487449	0.599822
146503834	0.599763
21117616	0.599721
121487125	0.599544
488248	0.599544
121487128	0.599544
515085	0.599458
135491495	0.599304
21134384	0.599267
14632483	0.599228
135473648	0.599053
135686065	0.599053
135435206	0.599044
1778309	0.599003
853012	0.598918
643968	0.598918
43834572	0.598918
70610597	0.598918
46781591	0.598918
13071731	0.598918
450214	0.598918
5790	0.598918
139025303	0.598918
5702211	0.598918
472173	0.59884
54558447	0.59884
499786	0.598818
489669	0.598801
21145513	0.598775
512321	0.598748
7308567	0.598403
134481	0.598403
451368	0.598255
453781	0.597833
121225517	0.59769
191215	0.59767
15124184	0.597604
139025680	0.597541
10389132	0.597541
54021277	0.597535
2729604	0.597469
27661670	0.597469
94196	0.597469
7059462	0.597469
1263225	0.597469
7195995	0.597469
68206315	0.597469
91541	0.597457
92143407	0.597457
44289445	0.597457
189012	0.597415
56609687	0.597297
54109572	0.597208
90470199	0.597084
7282398	0.596928
118312477	0.596928
1265899	0.596928
169704	0.596928
14367013	0.596928
7282400	0.596928
21824456	0.596928
162367444	0.596884
18651801	0.596881
475378	0.596865
137128754	0.596854
121487098	0.596808
15839349	0.59658
256040	0.59658
86295119	0.59658
96622	0.59658
21145448	0.596401
137346607	0.596381
127931	0.596305
15954533	0.596285
483935	0.596177
156594223	0.596138
40493564	0.59612
98575509	0.59612
10040433	0.595977
10800485	0.595942
121487362	0.595923
169938	0.595905
92980960	0.595647
125460	0.595647
70700658	0.595647
121487127	0.595588
488249	0.595588
374116	0.595588
121487124	0.595588
21140838	0.59557
10061135	0.595374
3007909	0.59533
15693249	0.595327
10754350	0.595168
71303724	0.595046
510573	0.59497
121487298	0.594672
512320	0.594666
136270978	0.59458
10922291	0.594454
98315	0.594454
66931238	0.594389
7074855	0.594278
71302446	0.594256
3246335	0.594212
171228	0.594071
515212	0.594055
21627890	0.594042
92237723	0.594042
121216298	0.593941
453016	0.593938
91668444	0.593778
2783871	0.593719
13121580	0.593719
71303674	0.593522
44829127	0.593505
156595074	0.593502
512674	0.593432
14095555	0.593423
136791445	0.593406
135398640	0.593406
4661673	0.593255
129678688	0.59324
6481568	0.593226
137699522	0.593167
156594190	0.593089
77174428	0.593087
15764402	0.593069
451391	0.593055
5274292	0.593044
6327751	0.593022
15342951	0.593022
6713933	0.593022
71371593	0.593001
46936788	0.592903
445537	0.592903
4470179	0.592903
65375	0.59283
11817992	0.592797
121487387	0.592585
135435111	0.592503
135398630	0.592493
14430116	0.59244
130060	0.592405
11594626	0.592392
14842981	0.592375
72260	0.592276
136190394	0.592248
67113473	0.592098
11109507	0.592081
14842983	0.592017
44421147	0.591952
44372621	0.591952
128866	0.591757
156594220	0.591738
137700714	0.591691
124712750	0.591632
57704515	0.59157
9881381	0.59157
451366	0.591513
13833655	0.591513
5274149	0.591462
512322	0.591417
44316739	0.591417
71317010	0.591417
100533	0.591399
21855041	0.591298
351382	0.591256
10956375	0.591256
41097849	0.591256
51403981	0.591256
13831089	0.591256
71314711	0.591256
65510	0.591256
452423	0.591166
20600569	0.591085
91872277	0.59107
101317	0.59107
450215	0.59107
57369201	0.59107
54669724	0.59107
44629859	0.59107
1520351	0.59107
45356917	0.59107
44630766	0.59107
7059460	0.59107
9427	0.59107
13066372	0.59107
13066370	0.59107
139026027	0.59107
194102	0.591043
136633725	0.591004
495959	0.590948
137195854	0.590908
131852023	0.590852
449584	0.590851
3000770	0.59084
454136	0.59083
45074659	0.590827
45051921	0.590697
92221238	0.590622
92221236	0.590622
134693227	0.590622
135518167	0.590614
136234097	0.590614
71302979	0.590572
451479	0.590494
14632481	0.590494
135596618	0.590473
139025201	0.590458
136257794	0.590458
136824017	0.590458
135518164	0.590458
136235778	0.590458
135454023	0.590458
6857539	0.590426
92271314	0.590426
6481578	0.590365
188967	0.590365
13989284	0.590298
451854	0.590298
453370	0.590295
136006897	0.590257
139025646	0.590257
135407175	0.590257
135708260	0.590257
6327750	0.590236
121698	0.590168
13052734	0.590168
137090731	0.590156
124528039	0.59007
4594140	0.589966
10335670	0.589966
21732373	0.589871
21856228	0.589871
162367440	0.589871
453782	0.589839
71410527	0.589824
131843751	0.589758
135398597	0.589749
137287473	0.589749
135596592	0.589749
54343230	0.589732
16655024	0.589722
472172	0.589719
122879	0.589719
89341487	0.589719
58859108	0.589719
99692	0.589674
10019998	0.589661
135771852	0.589608
53774252	0.589546
58463488	0.589541
3003718	0.589446
136921541	0.58936
453036	0.5892
13832606	0.589182
270262	0.589182
156588443	0.589179
381335	0.589149
5468297	0.589149
6367704	0.589149
495778	0.589149
516466	0.589079
3995254	0.589071
157173	0.589071
165328	0.589071
7275412	0.589071
45040528	0.589071
57177698	0.589071
7275411	0.589071
1265891	0.589071
77520542	0.589071
451453	0.589053
6573504	0.589012
136250551	0.588941
159338	0.588932
119051	0.588925
5271958	0.588884
72628785	0.58885
9859640	0.58885
136190395	0.588825
68655403	0.588735
150623	0.588716
23399682	0.588694
352713	0.588546
131874082	0.588546
3007771	0.588543
2735432	0.588434
135438476	0.588372
91668447	0.588215
515215	0.588163
493224	0.588092
7059457	0.588082
66377	0.588082
1814	0.588082
12922945	0.588082
2783891	0.588082
133125648	0.588078
6474236	0.588078
515211	0.588014
452513	0.588001
122622	0.587806
23531406	0.587656
13711969	0.587506
137699423	0.587452
94312	0.587428
77520540	0.587428
124304833	0.587428
156588711	0.587428
373406	0.58737
53965369	0.587326
146066	0.587326
16133029	0.587304
86306492	0.587283
131877226	0.587183
454139	0.587167
454138	0.587167
10015599	0.587119
451833	0.587114
135408506	0.586902
135763231	0.586902
6483689	0.586811
10589260	0.586728
54444717	0.586694
121487889	0.586642
398256	0.586635
102063598	0.586515
145711906	0.586394
135398692	0.586378
125478223	0.586378
54424807	0.586353
148264	0.586179
5273980	0.586171
171185	0.58616
92266931	0.58616
3010090	0.58605
3036202	0.586041
135517354	0.585952
14530807	0.585855
53901126	0.58584
451842	0.585686
16226669	0.585637
7035901	0.585637
25796514	0.585637
12358445	0.585637
59116124	0.585637
5901	0.585637
451480	0.585581
60708	0.585581
121487302	0.585581
136088499	0.585485
135462125	0.585485
135602246	0.585485
135491415	0.585485
135405922	0.585476
10425238	0.585362
135438607	0.585266
135452524	0.585266
131882935	0.585262
76844933	0.585262
91668392	0.585262
155982232	0.585262
77174437	0.585262
134715536	0.585191
21121800	0.585046
13845302	0.584882
9814370	0.584808
92268298	0.584605
10730026	0.584592
3246700	0.584442
5726	0.584442
455007	0.584442
49849901	0.584442
71313574	0.584442
451515	0.584442
35370	0.584442
51346748	0.584442
56846050	0.584442
16398721	0.584442
11043760	0.584442
119025583	0.584442
139025114	0.5844
94136	0.5844
22803666	0.5844
7264507	0.5844
11119722	0.584309
135538690	0.584307
14071470	0.584298
137019865	0.584203
131858702	0.583838
374121	0.583645
3036983	0.58362
137176536	0.583611
135602211	0.583611
146674683	0.583581
146681747	0.583581
135398596	0.583576
136259535	0.583576
71407741	0.583532
451414	0.583342
122621	0.583276
452188	0.583276
44593585	0.583251
11346304	0.583238
483924	0.583227
92979558	0.583163
134694010	0.583163
124301946	0.583163
92131910	0.583163
191372	0.583163
92979557	0.583163
6481837	0.583156
152475	0.583081
42624707	0.583077
3006944	0.583037
92253117	0.58303
57358089	0.58303
92247583	0.583003
15047	0.583003
139025195	0.583003
379817	0.58294
190488	0.58294
511015	0.582862
3908006	0.582834
452029	0.582834
55262	0.582834
6473718	0.582834
90673693	0.582685
71302445	0.58267
136706893	0.582669
90830681	0.582607
6481572	0.58245
100652	0.582305
483943	0.582269
125494577	0.582219
136821128	0.582219
135897000	0.582219
137108250	0.582219
135920662	0.582219
135445750	0.582219
135897124	0.582219
9813340	0.582148
451593	0.582148
5270780	0.582141
483921	0.582141
137128751	0.582009
71023056	0.58198
146160048	0.581979
138058736	0.581979
137699191	0.581979
146013455	0.581858
10403633	0.581845
161746	0.581831
131852043	0.581743
137198957	0.581738
3010410	0.581653
91490554	0.581652
488244	0.581652
136745025	0.581649
135406950	0.581649
136441961	0.581649
135404725	0.581649
90356982	0.581618
44421198	0.581547
54359085	0.581329
44292127	0.581308
122107	0.581308
135440620	0.58128
71352233	0.581247
121011373	0.5812
21117472	0.581193
21118337	0.581157
453467	0.581157
10922698	0.581157
6573798	0.581157
108074	0.581157
193091	0.581105
121487282	0.581102
92132209	0.581063
162450	0.581063
6553883	0.581063
2783888	0.581063
99543	0.58101
366996	0.580997
140344780	0.58094
14826943	0.580933
21145446	0.58091
5280127	0.580845
6618794	0.580838
640	0.580838
11644295	0.580838
90472728	0.580838
102601363	0.580838
90472727	0.580838
140857142	0.580838
54096233	0.580838
71315522	0.580838
90472737	0.580838
7059422	0.580838
101190254	0.580838
92043420	0.580838
90472726	0.580838
13712	0.580838
644272	0.580838
11183813	0.580838
13048618	0.580838
16212027	0.580838
92043439	0.580838
3010294	0.580744
512673	0.580619
53909207	0.580619
3007912	0.580557
453822	0.580509
21123822	0.58039
14776494	0.580344
90673699	0.580306
10967535	0.580303
14503009	0.580298
122625	0.580298
453034	0.580298
22787949	0.580256
5271695	0.58022
488245	0.580215
102602258	0.580191
162681	0.580191
131699279	0.580191
166772	0.580191
166753	0.580191
10868509	0.580191
10977646	0.580191
5270603	0.580191
126963445	0.580191
118855907	0.580191
7048808	0.580191
119209	0.580191
10999219	0.580191
72247	0.580191
10633834	0.580191
451756	0.580191
134556	0.580191
118855773	0.580191
448456	0.580191
10610280	0.580191
90472730	0.580191
102601698	0.580191
57369864	0.580191
155903799	0.580191
134667	0.580191
190287	0.580191
46783076	0.580191
46783075	0.580191
10911785	0.580191
71308516	0.580191
118855911	0.580191
89486751	0.580175
44353411	0.580168
451576	0.580168
10494279	0.580142
137218731	0.580071
156589123	0.580057
91668391	0.580057
11000823	0.579848
102057561	0.579796
71442569	0.579795
6708818	0.579783
22884229	0.579783
6256	0.579783
688121	0.579783
490037	0.579783
45055429	0.579758
73164480	0.579758
121487345	0.579751
69908761	0.579751
3036899	0.579677
188216	0.579673
5272848	0.579669
174316	0.57963
129654734	0.579555
131879863	0.579548
301080	0.579548
118991702	0.579534
124254961	0.579534
156619778	0.579534
21140890	0.579364
274083	0.57934
97381	0.57934
14862149	0.579258
45074628	0.579207
453829	0.579166
29927033	0.579164
68788748	0.579164
102212	0.579164
134694019	0.579164
124904944	0.579164
376366	0.579047
454135	0.579032
454134	0.579032
136267259	0.579
470199	0.578842
5271378	0.578762
65561	0.578762
136921545	0.578759
6858204	0.578742
450772	0.57872
9878109	0.57872
45357589	0.57872
2783889	0.57872
13833666	0.57872
284240	0.57872
33039	0.57872
42104317	0.57872
46780621	0.57872
455170	0.578714
21120755	0.578714
135434782	0.578703
146160877	0.578661
137239458	0.578661
71650947	0.578643
481078	0.578632
124923	0.578632
92248239	0.578613
10658983	0.578603
13887514	0.578485
71302592	0.578442
154703288	0.578435
136921544	0.578404
483944	0.578315
13989062	0.578266
13989061	0.578266
456110	0.578264
69906586	0.578189
451372	0.578152
6915703	0.578148
3007778	0.578148
452398	0.578107
53962626	0.578092
52951009	0.578046
12994226	0.578027
14079545	0.577978
453631	0.57795
6479140	0.577941
44630569	0.577933
12097724	0.577931
512323	0.57791
9992804	0.577851
3081398	0.577827
156594214	0.577787
100932477	0.577767
135435173	0.577688
15764404	0.577598
154730315	0.577594
25139868	0.577571
136898426	0.577486
137221166	0.577486
136823426	0.577486
136623055	0.577486
135596570	0.577486
155903791	0.577486
135538738	0.577486
135499776	0.577486
135508725	0.577486
136806184	0.577486
135499520	0.577486
135768162	0.577486
136029099	0.577486
136232965	0.577486
135402034	0.577486
135461724	0.577486
135726185	0.577486
135514572	0.577486
135582771	0.577486
4304654	0.577478
494929	0.577478
160130	0.577475
156594853	0.577459
453628	0.577414
496603	0.577332
3011752	0.57733
131878154	0.577329
121217573	0.577329
438430	0.5773
483927	0.577272
318920	0.577266
514810	0.577263
137699513	0.57725
451856	0.577243
3007221	0.577196
16748010	0.577189
5270571	0.577189
5271379	0.577189
124294	0.577189
127792	0.577141
5274144	0.577133
19989149	0.577092
454163	0.577092
6913097	0.577081
10266795	0.577075
15277828	0.57704
135743938	0.577013
602053	0.576932
45052277	0.576919
72272	0.576862
10848780	0.576833
14367018	0.576797
54370573	0.576794
475547	0.576787
121487278	0.576773
135618591	0.576744
137239010	0.576744
71773082	0.576718
54555880	0.576686
70818775	0.576668
477012	0.576571
6481577	0.576457
11821571	0.576429
121487067	0.576383
136273848	0.57634
5270576	0.576339
13590781	0.576339
72327	0.576339
159498	0.576339
11065206	0.576339
21115140	0.576339
71314901	0.576339
44289645	0.576339
10777654	0.576339
9904475	0.576316
71447196	0.576306
53470632	0.576306
71443381	0.576306
71439804	0.576306
71443380	0.576306
121219169	0.576276
136088501	0.576263
135718453	0.576263
267808	0.576198
14682078	0.576198
483922	0.576135
71402706	0.576133
451824	0.576114
11207624	0.576096
7264506	0.576078
23421209	0.576078
137191441	0.576056
135398639	0.576054
72274	0.576024
488246	0.57599
273749	0.575969
131875668	0.575969
136896502	0.575912
135453913	0.575912
146674837	0.575783
5326138	0.575782
5271953	0.575634
483933	0.575602
9838543	0.575561
92253016	0.575561
16749579	0.575561
71314827	0.575561
40507260	0.575561
92186	0.575561
29933576	0.575561
150619	0.575493
23541118	0.575492
131860511	0.575484
509189	0.575407
72273	0.575396
453020	0.575356
453025	0.575356
451821	0.575217
14444210	0.575217
5274286	0.575216
14367012	0.575182
135433550	0.575177
135538696	0.575153
6858194	0.575095
10041866	0.575018
135856015	0.574964
66608846	0.574891
156594213	0.574885
135538693	0.574708
15940294	0.574686
121217178	0.574659
45052112	0.574554
77280618	0.574554
135121947	0.574554
479303	0.574552
67327211	0.574544
14483474	0.574528
3371855	0.574528
59728433	0.574528
121006824	0.574503
398257	0.574502
14730205	0.57448
86751178	0.574477
514172	0.57442
22211360	0.57442
135423946	0.574407
515083	0.574394
5273626	0.574354
511014	0.574259
15118619	0.574214
390868	0.574053
500305	0.574053
73319	0.573993
477547	0.573993
11957910	0.573956
95730862	0.573934
135398550	0.573932
76845493	0.573924
3080754	0.573886
483948	0.573883
136099021	0.573815
6560385	0.573803
57035796	0.573803
96373	0.573803
13766569	0.573803
124466	0.573774
137699529	0.573774
156588731	0.57368
452399	0.573676
136385771	0.573672
135768196	0.57366
490390	0.573623
136415743	0.573592
124794323	0.573522
5273019	0.573512
139025107	0.573422
11380753	0.573422
22211279	0.573421
136020842	0.57342
135412763	0.573361
490256	0.573313
136265296	0.573284
191808	0.573247
102505730	0.573179
511000	0.573132
121487087	0.573107
128359	0.573067
512003	0.573045
71302904	0.572996
6398509	0.572993
121487134	0.572966
121487460	0.572953
136921547	0.572933
135508837	0.572863
196507	0.572844
71303016	0.572829
71302469	0.572824
122130330	0.572824
156594897	0.572659
136381024	0.572638
136119103	0.572603
11174347	0.572559
138059290	0.572548
156594212	0.572535
45052196	0.572535
472167	0.57246
135457441	0.572356
4866813	0.57234
136100249	0.572327
71351698	0.57227
452063	0.572063
483945	0.572048
136176852	0.572004
1247503	0.571992
139025682	0.57193
172915	0.571885
465608	0.571868
162641488	0.571848
122110	0.571848
451889	0.571848
509185	0.571848
135435044	0.571812
136186017	0.571812
6560187	0.571791
25886830	0.571791
21732374	0.571764
11849876	0.571725
14428908	0.57172
21854458	0.571689
6479139	0.571667
135764626	0.571663
122109	0.57166
451887	0.57166
14726901	0.57166
156589112	0.571549
91668445	0.571513
3013084	0.571475
122130386	0.571454
506492	0.571425
124566007	0.57135
21772594	0.57135
118797419	0.57135
77174427	0.57135
122130033	0.57135
9837976	0.571339
69253781	0.571339
3000763	0.571339
71350138	0.571332
156594219	0.571305
456905	0.571238
508215	0.571234
14132914	0.571231
72263	0.571231
136752832	0.571097
136081429	0.571097
135501639	0.571084
139025264	0.571084
135433653	0.571083
477552	0.571073
56664677	0.571051
136817853	0.571001
135521334	0.571001
153103	0.570985
146980	0.570985
335399	0.570983
93481381	0.570983
6480444	0.570983
492555	0.570972
465650	0.570907
135538673	0.570878
98911	0.570864
146674699	0.570738
511378	0.570735
324745	0.570705
76844602	0.570695
137139924	0.570659
3010523	0.570619
13009364	0.570591
13989283	0.57058
451371	0.57058
156588728	0.570562
65062	0.570516
5342744	0.570516
7059455	0.570516
512330	0.57051
92237996	0.570447
137182907	0.570425
129318779	0.570374
477548	0.570364
89486819	0.570339
512004	0.570337
121487527	0.570331
134220	0.570327
6439649	0.570327
6505368	0.570327
10849857	0.570253
456904	0.570253
104762	0.570216
46876949	0.570216
135625267	0.570148
483929	0.570048
97480	0.569972
23617998	0.569972
6566064	0.569972
18881	0.569972
7099911	0.569972
133609839	0.569942
156594992	0.569899
66760234	0.56987
56619127	0.569782
135532713	0.569712
135800807	0.569712
135538642	0.569712
135538671	0.569712
453632	0.569688
76845224	0.569686
6035	0.569624
151790	0.569624
7195999	0.569624
90954505	0.569624
2729613	0.569624
6603739	0.569624
131864317	0.56961
67353063	0.569608
131858703	0.569598
11770144	0.569579
5273982	0.569556
92165061	0.569537
71407837	0.569533
71324527	0.569533
121487883	0.569516
136795137	0.569505
135492361	0.569505
452407	0.56947
500209	0.569415
381336	0.569415
133589974	0.569358
121216424	0.569318
5274310	0.569316
511984	0.569295
69907861	0.569288
512736	0.569251
14209054	0.569234
92978664	0.569234
6482479	0.569234
97107236	0.569234
21115121	0.56919
72249	0.56919
93621995	0.56919
71366478	0.569137
15516021	0.569071
21145867	0.569055
455171	0.569055
71422951	0.569003
6481574	0.568948
5271955	0.568942
139025196	0.568868
139026028	0.568857
16667722	0.568857
134694950	0.568857
17513	0.568857
135600345	0.568856
512172	0.568788
129874	0.568756
490392	0.568746
146156886	0.568697
72296	0.568697
72250	0.568661
380084	0.568661
71750617	0.568661
477015	0.568637
5271956	0.568597
451890	0.568577
9921551	0.568577
473662	0.568526
473661	0.568526
54446036	0.568447
160155	0.568417
12805651	0.568417
14030964	0.568388
64978	0.568388
77520089	0.568327
163320833	0.568324
10610233	0.568314
98581	0.568314
135692738	0.568313
135459434	0.568313
136691103	0.568313
454140	0.568306
454141	0.568306
451846	0.568292
451830	0.568277
121487370	0.568238
137077012	0.568219
451454	0.568217
12994351	0.568186
44560429	0.568174
12151656	0.568169
5274367	0.568165
137186166	0.568146
135501934	0.568095
136752834	0.568095
490040	0.568071
167994	0.568071
5287614	0.568043
512329	0.567994
150667	0.567969
121487418	0.567958
4269332	0.567939
3034646	0.567939
5272744	0.567929
154726241	0.567786
130209	0.567786
138059312	0.567758
14885960	0.567752
14885959	0.567752
14885958	0.567752
480264	0.567752
137189782	0.567752
510576	0.56772
260474	0.567715
11163152	0.567715
439541	0.567711
512324	0.567699
121487081	0.567613
135398677	0.567536
21676639	0.567471
512626	0.567441
72371	0.567429
22316427	0.567429
452990	0.56742
45045221	0.567402
465649	0.567375
11493075	0.56732
454243	0.567223
512134	0.567216
333596	0.567216
92264929	0.567216
6482246	0.567183
192785	0.567163
135625266	0.567121
6712985	0.567119
9994258	0.567119
3037189	0.567095
121487130	0.567047
498021	0.567047
121487126	0.567047
5287615	0.567042
16666490	0.56696
3005551	0.566947
22211503	0.566923
516463	0.566923
504733	0.566887
14502994	0.566848
451585	0.566848
29923570	0.566845
11323459	0.566845
121487093	0.566794
155395	0.566788
121219148	0.566777
76845819	0.566753
92149401	0.56673
96565	0.56673
255047	0.56673
24773090	0.566659
301081	0.566659
122130294	0.56665
136229414	0.566573
45041252	0.566538
135994927	0.566497
136251916	0.566433
10490402	0.566416
121487431	0.566416
57173805	0.566362
135583322	0.566347
135743936	0.566347
135583321	0.566322
11832095	0.56632
66763497	0.566292
135509108	0.566245
452215	0.566241
452035	0.566241
135538692	0.566234
171490	0.566198
146674828	0.56613
22881724	0.566122
11728978	0.566103
71365916	0.566014
489578	0.566
492556	0.565959
3080744	0.565932
13071768	0.565899
451847	0.565815
5271957	0.565811
135403801	0.565796
135768164	0.565796
135547062	0.565796
136666654	0.565796
136232990	0.565796
135914512	0.565796
137295291	0.565796
16080049	0.565736
92246421	0.565673
3011251	0.565663
136265295	0.565625
72257	0.56561
56608890	0.565567
137077004	0.565475
45105016	0.565473
10377155	0.565467
3005552	0.565298
71761524	0.565289
14260256	0.565282
493838	0.565277
493843	0.565277
131884784	0.565273
148744	0.56524
477014	0.565202
121487112	0.565202
90117986	0.565197
469715	0.565182
71370351	0.565181
151360	0.565179
163888	0.565151
493218	0.565129
136076706	0.565085
136854232	0.565085
135434940	0.565085
137274215	0.565085
135433837	0.565085
451455	0.565002
12081433	0.56498
91668475	0.564978
10754975	0.564952
452892	0.564952
136319505	0.564885
135464923	0.564885
135742509	0.564885
260472	0.564866
121487307	0.564852
451516	0.564809
135771870	0.564801
90673692	0.564779
54432316	0.564772
137187015	0.56477
13276250	0.564764
6439425	0.564742
122220071	0.564648
91668349	0.564645
135804809	0.564601
121007158	0.564578
444146	0.564545
21116189	0.56445
451481	0.56445
86145	0.56445
90472229	0.564396
92268334	0.564396
40544496	0.564396
29933626	0.564396
3007908	0.564396
44629873	0.564396
45358309	0.564396
150851	0.564396
21122961	0.564396
131878861	0.564317
1817	0.564282
6708804	0.564282
3080753	0.564273
13846336	0.564269
454142	0.564265
516467	0.564251
196471	0.56424
91668483	0.564219
134715457	0.564219
250904	0.564139
12497373	0.564139
11746791	0.564139
136801906	0.564135
136835831	0.564135
139025685	0.564135
136628879	0.564135
137105585	0.564135
135544549	0.564135
135582772	0.564135
139025684	0.564135
136623053	0.564135
137204795	0.564135
135403804	0.564135
135453910	0.564135
135742137	0.564135
135402018	0.564135
137072542	0.564135
136644173	0.564135
77282269	0.564134
136088507	0.56412
16747775	0.564119
66690715	0.564095
137230682	0.564092
121487417	0.564068
137700694	0.564046
121007446	0.563978
122130879	0.563974
3005549	0.563971
12042794	0.563907
96545	0.563829
453461	0.56381
509186	0.56381
509184	0.56381
21821194	0.563778
125836	0.563772
156594850	0.563711
9996041	0.5637
21151082	0.563667
124411	0.563663
53988721	0.563644
136176844	0.563631
135800809	0.563631
71303972	0.563631
71308982	0.563629
65049	0.563629
13020162	0.563629
57057957	0.563629
139024626	0.563629
11807505	0.563629
7282396	0.563629
7078333	0.563629
131854196	0.563629
445408	0.563629
6566029	0.563629
6618663	0.563629
118855897	0.563629
90470943	0.563629
90472729	0.563629
121487430	0.563629
162640537	0.563596
65095	0.563596
15719357	0.563582
21625759	0.563566
137700712	0.563538
5273990	0.563515
5271819	0.563504
135450796	0.563484
279519	0.563483
51409932	0.563483
21778597	0.563483
12111611	0.563483
464365	0.563483
162367439	0.563454
22856727	0.563454
121006761	0.563206
11461625	0.563177
6131	0.563177
117064372	0.563177
124170	0.563177
71309346	0.563177
10685594	0.563162
188575	0.563149
155889176	0.563094
135556930	0.563094
13871040	0.562903
101658091	0.56289
135463451	0.562889
13845038	0.56281
127258203	0.562776
5272906	0.562754
13845047	0.562733
23624100	0.562696
135815016	0.562634
135531159	0.562634
101643824	0.56251
130775	0.562488
118705321	0.562457
131843750	0.562445
23363310	0.562415
449623	0.562409
14312484	0.562343
134693115	0.562343
451602	0.562343
469286	0.562328
11608602	0.562328
453463	0.562328
53792010	0.562324
161730	0.562237
40507941	0.562237
36689109	0.562237
356652	0.562237
392940	0.562224
57357987	0.562199
71772549	0.562068
126969140	0.562068
121487114	0.562068
121487515	0.562068
165148	0.562068
11747043	0.562068
92043551	0.562068
101384428	0.562068
100935581	0.562068
151772	0.562068
10377200	0.562068
121487065	0.562068
45356795	0.562068
89495556	0.562068
90472260	0.562068
49849540	0.562068
11064619	0.562068
18323	0.562068
46780472	0.562068
76973510	0.562068
46780471	0.562068
7059437	0.562068
118855918	0.562068
53775732	0.562068
123262984	0.562068
76973315	0.562068
118855855	0.562068
90472731	0.562068
131708540	0.562068
643973	0.562068
11010214	0.562068
123993511	0.562068
101343952	0.562068
124202892	0.562068
7059439	0.562068
167877	0.562068
121487529	0.562068
453820	0.562012
6452664	0.561944
10332009	0.561923
124766	0.561912
135596626	0.561879
3007126	0.561865
179629	0.561836
6419973	0.561836
107764	0.561836
5905	0.561836
51371334	0.561836
1272916	0.561836
511644	0.561836
136270374	0.561821
135526591	0.561797
135413551	0.561749
72265	0.56172
452055	0.56172
21115127	0.56172
13988994	0.56172
53724373	0.56171
136177058	0.561702
121487526	0.56167
254695	0.561653
121487388	0.561639
54377788	0.561633
136734671	0.561584
44281962	0.561568
11097661	0.561559
481582	0.561543
3082267	0.561527
5274084	0.561406
3012252	0.561394
71304002	0.561347
15704731	0.561298
71354328	0.561254
10445677	0.561254
456570	0.561252
124663253	0.561251
124663254	0.561251
77068305	0.561251
135960421	0.561228
97300904	0.561227
21765584	0.561223
156594225	0.561198
126220	0.561169
440393	0.561169
125507100	0.561161
71303902	0.561148
90663906	0.561141
121487521	0.561124
15693167	0.561123
24886781	0.561106
22646017	0.561106
559992	0.561089
10780244	0.561069
135445713	0.561018
136067613	0.561018
136025160	0.561018
136017105	0.561018
136892633	0.561018
135440068	0.561018
136892634	0.561018
15689273	0.560927
125925	0.560927
22057571	0.560927
121487327	0.560927
3009782	0.56092
107870	0.560909
135741933	0.560875
137100249	0.560862
462388	0.560851
195200	0.56083
20871287	0.560821
271276	0.560802
92161858	0.560802
473453	0.560781
466414	0.560781
454159	0.560781
473450	0.560781
135926583	0.560749
135616717	0.560749
475380	0.560746
137128747	0.560711
137699517	0.560684
137795695	0.560673
25185460	0.560673
129317616	0.560673
132283239	0.560673
131884455	0.560647
10317833	0.560614
126969944	0.560614
133121258	0.560614
3005554	0.560608
131878859	0.560592
11129803	0.560579
3035713	0.560563
72736985	0.560535
49822695	0.560505
64979	0.560496
135467705	0.560469
136240744	0.560468
155898483	0.560467
136258069	0.560467
480265	0.560464
136238399	0.560463
15788526	0.56046
5289205	0.560434
136217926	0.560397
124430633	0.560341
124430634	0.560341
135623679	0.560332
136157781	0.560332
135398593	0.560332
135400896	0.560332
136069427	0.560332
23391556	0.560209
137700713	0.560191
20722666	0.560159
172916	0.560149
121218048	0.560148
102381563	0.560134
135849075	0.56011
452079	0.560052
3001977	0.560052
451569	0.560052
135718450	0.560029
10923198	0.560021
131880589	0.559959
511377	0.559953
156594216	0.559952
122130785	0.559949
15609252	0.559934
66689989	0.559911
320720	0.559826
21140275	0.559814
452680	0.559813
137212578	0.5598
3005553	0.559775
15276822	0.559728
3007911	0.559718
194168	0.55968
21117413	0.55968
169061	0.559679
480247	0.55962
6481847	0.559586
6481848	0.559586
454120	0.559476
134520771	0.559465
3000371	0.559464
10086464	0.559459
451882	0.559387
509187	0.559338
22792111	0.559338
54528106	0.55933
136118471	0.559275
121216763	0.55927
136236459	0.559233
13941609	0.559213
135435172	0.55919
135764690	0.55919
135778987	0.55919
135753280	0.55919
330407	0.559184
131881789	0.559184
136243250	0.559152
135503550	0.559152
14860269	0.559146
136387048	0.559112
11054122	0.559099
137183035	0.559058
15928623	0.559012
452893	0.558995
452421	0.558927
135976885	0.558919
42637091	0.558896
11822163	0.558892
11140845	0.558832
129350	0.558832
163285680	0.558832
156594205	0.558809
10978511	0.558804
98801	0.558792
53741175	0.558784
452277	0.558748
21765583	0.558695
156588467	0.558683
3005547	0.558662
483923	0.558639
5270689	0.558622
101518	0.558596
5274112	0.55859
453656	0.558538
453768	0.558458
121486885	0.558455
15747441	0.558402
152369	0.558399
76845222	0.558386
136674916	0.558361
471434	0.558313
21829242	0.5583
6479148	0.558298
4477522	0.558233
439866	0.558233
121216248	0.558229
439686	0.558211
3013082	0.558187
5274287	0.558162
137249367	0.558129
330549	0.558106
76845462	0.558063
189921	0.558052
54074059	0.558033
136744872	0.558026
136257804	0.558021
137090331	0.558021
135509485	0.558021
135511868	0.558021
136843263	0.558021
3009328	0.557979
21140443	0.557866
135837239	0.557822
101516	0.557801
11001059	0.557801
135538675	0.557752
73351959	0.557715
135518	0.557659
90673691	0.557624
53777786	0.557607
135527049	0.557567
135410239	0.557566
504737	0.557553
504738	0.557525
135443291	0.557464
154906	0.557432
135485495	0.557324
71302591	0.557274
6325427	0.557209
129318777	0.557192
96124	0.55719
92229496	0.55719
10732949	0.557144
59628308	0.55714
121487512	0.557096
511670	0.557096
5271380	0.557083
124295	0.557083
483941	0.557058
14862109	0.557042
14862110	0.557042
135959544	0.557028
56961027	0.557006
21116192	0.556979
451567	0.556979
121487306	0.556935
159467	0.55692
504736	0.556899
3012253	0.55688
129384392	0.556851
135625314	0.556845
5271821	0.556824
452946	0.556807
21854120	0.556748
20849148	0.556737
3005555	0.556708
49866464	0.556697
6565903	0.55666
10826877	0.55666
45033563	0.55666
12883711	0.55666
459896	0.55666
54535902	0.556636
135602220	0.556621
135427250	0.556611
451888	0.556603
121487452	0.556569
506489	0.556569
136272494	0.556547
101384430	0.556542
14503364	0.556512
15160537	0.556502
54070888	0.55649
14539818	0.556468
21852781	0.556443
125014	0.556437
37542	0.556291
76973118	0.556291
91927745	0.556291
490511	0.556291
15673565	0.556261
6482245	0.556236
512139	0.556223
135959545	0.556154
137138689	0.556154
135789978	0.556154
137138632	0.556154
29982449	0.556129
71387182	0.556128
10446489	0.556124
136161656	0.556095
3007777	0.556043
146979	0.556043
135457959	0.556028
135483717	0.556028
121217776	0.555945
10092318	0.555934
54276168	0.555902
135410906	0.555881
117590597	0.555877
135401030	0.555852
454121	0.555852
3008473	0.555751
498020	0.55572
153548	0.555719
53835662	0.555616
135538689	0.555443
21120430	0.555416
137147094	0.555342
310061	0.555338
23263710	0.555338
22899187	0.555242
478561	0.555241
135431817	0.555196
135538672	0.555196
102152336	0.555173
46173764	0.555108
452132	0.5551
90470680	0.55498
454160	0.554968
466416	0.554968
77520394	0.554966
15333771	0.554963
10869630	0.554962
191759	0.554903
121007874	0.554897
500026	0.554877
174657	0.554876
459943	0.554788
21140290	0.554786
126639768	0.554732
99592	0.554732
7282378	0.554732
156595061	0.554718
72756109	0.554718
71347840	0.554701
54023955	0.554687
3007131	0.554674
135783067	0.554641
3005548	0.554604
3007134	0.554572
14367014	0.554571
14367015	0.554571
512137	0.554562
21668259	0.554538
14215165	0.554515
5271959	0.554423
451566	0.554415
509516	0.554415
10979410	0.554391
5273624	0.554222
135398727	0.554222
136847919	0.554222
136134225	0.554222
5272746	0.554208
131884918	0.554191
6480502	0.554129
320215	0.554129
5274161	0.554067
92751	0.554033
12313774	0.554033
511668	0.553981
135927359	0.553912
135445744	0.553912
68661802	0.553897
[truncated: 5,258 more rows]
