# Supplementary material for: Development of Machine Learning Models for Precise Prediction of Bioactive Supramolecular Nucleoside Hydrogels
Source: Research Square preprint supplement (doi:10.21203/rs.3.rs-6888838/v1), 2025-07-10
Supplement: Supplementary file 8 [file 8df7bcc982de75600ed44e92.xlsx]

## Sheet: 1. toxicology
Supplementary Data 2. Simplified Molecular Input Line Entry System(SMILES) of 9 bioactivity datasets
Bioactivity dataset 1. biological toxicology
ID	Tox	Canonical_smiles
TOX1002	1	CN(N=O)c1ccc([N+](=O)[O-])cc1
TOX10047	0	Brc1cc(Br)c(Oc2cc(Br)c(Br)cc2Br)cc1Br
TOX10056	1	Brc1ccc(Oc2ccc(Br)cc2Br)c(Br)c1
TOX1006	1	CN(N=O)C(N)=O
TOX10060	0	CC(C)(Cl)Cl
TOX10138	0	CC(=O)CCC(C)=O
TOX10162	1	CC(=O)c1nccs1
TOX10189	0	Nc1ccccc1-c1ccccc1
TOX10197	0	CC(C)Br
TOX1022	0	CC(=O)CN(CC(C)=O)N=O
TOX10258	0	CC1CCCO1
TOX1026	0	CCCCN(CCCC)N=O
TOX1027	0	O=NN(CCO)CCO
TOX1028	1	CCN(CC)N=O
TOX1029	0	CN(C)N=O
TOX1030	1	O=NN(c1ccccc1)c1ccccc1
TOX10307	0	Nc1cc(Cl)cc(Cl)c1
TOX1031	1	O=Nc1ccc(Nc2ccccc2)cc1
TOX10317	0	CC(=O)c1cc(C)oc1C
TOX1032	0	CCCN(CCC)N=O
TOX10336	0	N#CCCCl
TOX1036	0	CCN(C)N=O
TOX10384	1	Nc1ccc(Cl)cc1[N+](=O)[O-]
TOX1039	0	O=NN1CCCCCCC1
TOX1040	0	O=NN1CCCCCC1
TOX10423	1	O=c1cc(-c2ccccc2)oc2ccc3ccccc3c12
TOX10428	0	O=Cc1ccc(CO)o1
TOX10432	0	Nc1ncn([C@H]2C[C@H](O)[C@@H](CO)O2)c(=O)n1
TOX105	0	O=C1O[C@H]([C@@H](O)CO)C([O-])=C1O
TOX1053	0	CN(N=O)c1ccccc1
TOX1056	0	O=NN1CCOCC1
TOX10588	0	CNCC(O)c1ccc(O)cc1
TOX1059	0	O=NN1CCNCC1
TOX106	1	O=C1O[C@H]([C@@H](O)CO)C(O)=C1O
TOX1060	0	O=NN1CCCCC1
TOX10604	0	CC1=CC(=O)CC(C)(C)C1(O)/C=C/C(C)=C\C(=O)O
TOX10606	0	CC1=CC(=O)[N-]S(=O)(=O)O1
TOX10607	0	CCOC(C)OCC
TOX1062	0	O=NN1CCCC1
TOX10636	1	COc1cccc2c1C(=O)c1c(O)c3c(c(O)c1C2=O)C[C@@](O)(C(=O)CO)C[C@@H]3O[C@H]1C[C@H](N)[C@H](O)[C@H](C)O1
TOX1065	0	Cc1ccccc1N=O
TOX10698	1	OC[C@H]1O[C@@H]2O[C@@H]3[C@@H](CO)O[C@H](O[C@@H]4[C@@H](CO)O[C@H](O[C@@H]5[C@@H](CO)O[C@H](O[C@@H]6[C@@H](CO)O[C@H](O[C@@H]7[C@@H](CO)O[C@H](O[C@H]1[C@H](O)[C@H]2O)[C@H](O)[C@H]7O)[C@H](O)[C@H]6O)[C@H](O)[C@H]5O)[C@H](O)[C@H]4O)[C@H](O)[C@H]3O
TOX107	1	COC(=O)[C@H](Cc1ccccc1)NC(=O)[C@@H](N)CC(=O)O
TOX1070	1	c1ccc2c(c1)[nH]c1cnccc12
TOX10760	0	CC[C@H]1OC(=O)[C@H](C)[C@@H](O[C@H]2C[C@@](C)(OC)[C@@H](O)[C@H](C)O2)[C@H](C)[C@@H](O[C@@H]2O[C@H](C)C[C@H](N(C)C)[C@H]2O)[C@](C)(O)C[C@@H](C)CN(C)[C@H](C)[C@@H](O)[C@]1(C)O
TOX10773	1	CO[C@H]1C=CO[C@@]2(C)Oc3c(C)c(O)c4c(c3C2=O)C2=NC3(CCN(CC(C)C)CC3)NC2=C(NC(=O)C(C)=CC=C[C@H](C)[C@H](O)[C@@H](C)[C@@H](O)[C@@H](C)[C@H](OC(C)=O)[C@@H]1C)C4=O
TOX10780	0	Cc1ncc(CO)c(CO)c1O
TOX10787	0	Cc1ccnc2c1NC(=O)c1cccnc1N2C1CC1
TOX108	0	CC(=O)Oc1ccccc1C(=O)O
TOX1080	1	COc1ccc2[nH]c(S(=O)Cc3ncc(C)c(OC)c3C)nc2c1
TOX1081	0	O=[N+]([O-])c1ccc(Nc2ccc(Nc3ccccc3)c(S(=O)(=O)[O-])c2)c([N+](=O)[O-])c1
TOX1082	0	O=S(=O)([O-])c1cc(S(=O)(=O)[O-])c2c(/N=N/c3ccccc3)c(O)ccc2c1
TOX1084	1	COc1cc(/C=C/C(=O)O[C@H]2CC[C@]34C[C@]35CC[C@]3(C)[C@@H]([C@H](C)CCC=C(C)C)CC[C@@]3(C)[C@@H]5CC[C@H]4C2(C)C)ccc1O
TOX1086	1	CNC(=O)ON=C(SC)C(=O)N(C)C
TOX1087	1	O=C1Nc2ccc(Cl)cc2C(c2ccccc2)=NC1O
TOX1089	0	CCn1cc(C(=O)O)c(=O)c2cc3c(cc21)OCO3
TOX1093	0	C=CCOc1ccccc1OCC(O)CNC(C)C
TOX1094	1	Nc1ccc(Oc2ccc(N)cc2)cc1
TOX10955	0	CC12CCC(CC1=O)C2(C)C
TOX1097	0	CN(C)[C@@H]1C(O)=C(C(N)=O)C(=O)[C@@]2(O)C(O)=C3C(=O)c4c(O)cccc4[C@@](C)(O)[C@H]3[C@H](O)[C@@H]12
TOX1100	1	CCOP(=S)(OCC)Oc1ccc([N+](=O)[O-])cc1
TOX1102	0	CC1(C)S[C@@H]2[C@H](NC(=O)COc3ccccc3)C(=O)N2[C@H]1C(=O)[O-]
TOX1103	0	COc1c(Cl)c(Cl)c(Cl)c(Cl)c1Cl
TOX1104	0	ClC(Cl)C(Cl)(Cl)Cl
TOX1105	1	O=[N+]([O-])c1c(Cl)c(Cl)c(Cl)c(Cl)c1Cl
TOX1109	0	O=[N+]([O-])OCC(CO[N+](=O)[O-])(CO[N+](=O)[O-])CO[N+](=O)[O-]
TOX11121	1	CC(C)C(=O)Nc1ccc([N+](=O)[O-])c(C(F)(F)F)c1
TOX11131	0	CCCCCOC(=O)c1ccccc1C(=O)OCCCCC
TOX11133	0	CCCOC(=O)c1ccccc1C(=O)OCCC
TOX1116	0	CCOc1ccc(NC(C)=O)cc1
TOX1117	0	Cc1cc(=O)n(-c2ccccc2)n1C
TOX1118	1	Nc1ccc(N=Nc2ccccc2)c(N)n1
TOX112	0	CCNc1nc(Cl)nc(NC(C)C)n1
TOX1121	1	N=C(N)NC(=N)NCCc1ccccc1
TOX1122	0	CCC1(c2ccccc2)C(=O)NC(=O)NC1=O
TOX1123	0	CCC1(c2ccccc2)C(=O)N=C([O-])NC1=O
TOX1124	0	Oc1ccccc1
TOX11248	1	c1cc[n+]2c(c1)-c1cccc[n+]1CC2
TOX1125	1	O=C1OC(c2ccc(O)cc2)(c2ccc(O)cc2)c2ccccc21
TOX1126	1	c1ccc2c(c1)Nc1ccccc1S2
TOX1127	1	CC(COc1ccccc1)N(CCCl)Cc1ccccc1
TOX1128	0	CN(C)N=Nc1ccccc1
TOX1129	1	S=C=Nc1ccccc1
TOX11290	1	CC(=O)C1(C)CC2=C(CCCC2(C)C)CC1C
TOX11294	0	CCOCC(=O)O
TOX113	1	CN1[C@H]2CC[C@@H]1C[C@H](OC(=O)C(CO)c1ccccc1)C2
TOX1130	1	CC1=NN(c2ccccc2)C(=O)C1
TOX1131	1	c1ccc(Nc2ccc3ccccc3c2)cc1
TOX1134	0	NC(=S)Nc1ccccc1
TOX1135	1	Oc1ccc2ccccc2c1/N=N/c1ccccc1
TOX11356	0	N[C@H]1C(O)O[C@H](CO)[C@H](O)[C@@H]1O
TOX1136	1	CCCCC1C(=O)N(c2ccccc2)N(c2ccccc2)C1=O
TOX1138	1	Nc1ccc(N)cc1
TOX11380	0	O=C1NC2NC(=O)NC2N1
TOX1139	1	Nc1cccc(N)c1
TOX114	1	CN(C)c1ccc(C(=N)c2ccc(N(C)C)cc2)cc1
TOX1142	0	CNC[C@H](O)c1cccc(O)c1
TOX1144	1	NNCCc1ccccc1
TOX11444	0	P#[In]
TOX1145	0	c1ccc(OCC2CO2)cc1
TOX11458	1	OCc1c[nH]c2ccccc12
TOX11460	0	CCCC[N+]1(C)CCCC1
TOX11461	0	CCCCn1cc[n+](C)c1
TOX1148	1	NNc1ccccc1
TOX11492	0	C=C(C)OC(C)=O
TOX11497	0	CC(C)OS(C)(=O)=O
TOX1151	1	Oc1ccccc1-c1ccccc1
TOX1152	1	Oc1ccc(-c2ccccc2)cc1
TOX11521	1	[PbH2+2]
TOX11531	1	CN(C)c1ccc(C(c2ccccc2)c2ccc(N(C)C)cc2)cc1
TOX1156	0	CCN(CC)C(=O)C(Cl)=C(C)OP(=O)(OC)OC
TOX11566	0	Cc1cccc(C)c1NC(=O)C1CCCCN1C
TOX1158	0	NC(=O)c1ccccc1C(N)=O
TOX1159	0	O=C1OC(=O)c2ccccc21
TOX11591	0	COCC(=O)O
TOX116	1	Nc1ncn([C@@H]2O[C@H](CO)[C@@H](O)[C@H]2O)c(=O)n1
TOX1160	1	Nc1c(Cl)c(Cl)nc(C(=O)O)c1Cl
TOX1162	0	CC[C@@H]1C(=O)OC[C@@H]1Cc1cncn1C
TOX11626	0	CC(=O)/C=C/c1ccccc1
TOX1163	0	C[C@@H]1CC=CC=CC=CC=C[C@H](O[C@@H]2O[C@H](C)[C@@H](O)[C@H](N)[C@@H]2O)C[C@@H]2O[C@](O)(C[C@@H](O)C[C@H]3O[C@@H]3C=CC(=O)O1)C[C@H](O)[C@H]2C(=O)O
TOX1164	1	C1CNCCN1
TOX1165	0	C1CCNCC1
TOX1166	1	CCCCOCCOCCOCc1cc2c(cc1CCC)OCO2
TOX117	1	Nc1cnn([C@@H]2O[C@H](CO)[C@@H](O)[C@H]2O)c(=O)n1
TOX1170	1	CN1C(C(=O)Nc2ccccn2)=C(O)c2ccccc2S1(=O)=O
TOX1174	1	Brc1cc(-c2ccc(Br)c(Br)c2Br)cc(Br)c1Br
TOX1175	0	CCCCCCCC/C=C/CCCCCCCC(=O)OCCOCC(OCCO)C1OC(OCCO)CC1OCCO
TOX1179	0	CC(=O)Nc1ccc(OCC(O)CNC(C)C)cc1
TOX118	1	[N-]=[N+]=CC(=O)OC[C@H](N)C(=O)O
TOX1181	1	O=C1CN=C(c2ccccc2)c2cc(Cl)ccc2N1CC1CC1
TOX1182	1	O=C(C1CCCCC1)N1CC(=O)N2CCc3ccccc3C2C1
TOX1184	1	C[C@]12C[C@H](O)[C@H]3[C@@H](CCC4=CC(=O)C=C[C@@]43C)[C@@H]1CC[C@]2(O)C(=O)CO
TOX1185	1	C[C@]12CC(=O)[C@H]3[C@@H](CCC4=CC(=O)C=C[C@@]43C)[C@@H]1CC[C@]2(O)C(=O)CO
TOX11860	0	O=C(O)C(F)(F)C(F)(F)C(F)(F)C(F)(F)C(F)(F)C(F)(F)C(F)(F)C(F)(F)C(F)(F)F
TOX11862	0	O=C(O)C(F)(F)C(F)(F)C(F)(F)C(F)(F)C(F)(F)F
TOX11863	1	O=C(O)C(F)(F)C(F)(F)C(F)(F)C(F)(F)C(F)(F)C(F)(F)C(F)(F)C(F)(F)F
TOX11865	1	O=C(O)C(F)(F)C(F)(F)C(F)(F)C(F)(F)C(F)(F)C(F)(F)C(F)(F)F
TOX1188	1	CCCN(CCC)S(=O)(=O)c1ccc(C(=O)O)cc1
TOX1189	0	CNNCc1ccc(C(=O)NC(C)C)cc1
TOX119	1	Cn1cnc([N+](=O)[O-])c1Sc1ncnc2nc[nH]c12
TOX11903	0	O=C(O)c1ccccn1
TOX1191	1	Nc1ccc2cc3ccc(N)cc3nc2c1
TOX1193	0	CC(C)NCC(O)c1ccc2ccccc2c1
TOX1195	0	O=S1(=O)CCCO1
TOX11956	0	CCCNC(C)C(=O)Nc1ccccc1C
TOX1196	0	CC(C)Nc1nc(Cl)nc(NC(C)C)n1
TOX1198	1	CC(C)NCC(O)COc1cccc2ccccc12
TOX1199	0	CCCCN(CC)C(=O)SCCC
TOX1201	1	CCCOC(=O)c1cc(O)c(O)c(O)c1
TOX1206	0	CC(O)CO
TOX12077	0	O=[Se]([O-])[O-]
TOX1209	1	CCCc1cc(=O)[nH]c(=S)[nH]1
TOX121	0	[N-]=[N+]=[N-]
TOX12113	1	CC(C)(C)C(O)(CCc1ccc(Cl)cc1)Cn1cncn1
TOX1212	0	O=C(O)c1ccc(O)c(O)c1
TOX12129	0	CC(C)(c1cc(Br)c(OCC(Br)CBr)c(Br)c1)c1cc(Br)c(OCC(Br)CBr)c(Br)c1
TOX1214	1	O=C1c2ccccc2C(=O)c2c(O)c(O)cc(O)c21
TOX1215	0	NC(=O)c1cnccn1
TOX1217	1	CCc1nc(N)nc(N)c1-c1ccc(Cl)cc1
TOX12180	0	Clc1cc(Cl)c(-c2cc(Cl)c(Cl)cc2Cl)cc1Cl
TOX1219	1	O=c1c(O)c(-c2ccc(O)c(O)c2)oc2cc(O)cc(O)c12
TOX12192	1	Cc1ccccc1OP(=O)(Oc1ccccc1C)Oc1ccccc1C
TOX122	1	COP(=S)(OC)SCn1nnc2ccccc2c1=O
TOX1221	1	CCOC(=O)[C@H](CCc1ccccc1)N[C@@H](C)C(=O)N1Cc2ccccc2C[C@H]1C(=O)O
TOX1222	1	ON=C1C=CC(=NO)C=C1
TOX1223	0	Cn1cc(C(=O)[C@@H]2CCc3[nH]cnc3C2)c2ccccc21
TOX123	1	c1ccc(N=Nc2ccccc2)cc1
TOX12303	1	CCCC/C=C\CCCCCCCCCC=O
TOX12309	0	CCCCOCCOC(=O)COc1ccc(Cl)cc1Cl
TOX1231	0	Cc1cc(C)c(/N=N/c2c(O)c(S(=O)(=O)[O-])cc3cc(S(=O)(=O)[O-])ccc23)cc1C
TOX12316	1	Cc1cc(O)cc(C)c1Cl
TOX1232	0	O=S(=O)([O-])c1ccc2c(/N=N\c3ccc(S(=O)(=O)[O-])c4ccccc34)c(O)c(S(=O)(=O)[O-])cc2c1
TOX12327	1	CNC(=O)Oc1cccc2c1OC(C)(C)O2
TOX12337	1	CCC(C)Nc1c([N+](=O)[O-])cc(C(C)(C)C)cc1[N+](=O)[O-]
TOX1234	0	Cc1cc(C)c(S(=O)(=O)[O-])cc1N=Nc1cc(S(=O)(=O)[O-])c2ccccc2c1O
TOX12344	1	CCOP(=S)(OCC)OC(Cl)C(Cl)(Cl)Cl
TOX1235	0	CCN(CC)c1cc2[o+]c3cc(N(CC)CC)c(C)cc3c(-c3ccc(S(=O)(=O)[O-])cc3S(=O)(=O)[O-])c2cc1C
TOX12352	1	COP(=S)(OC)Oc1nc(Cl)c(Cl)cc1Cl
TOX12354	0	C#CCOC(=O)[C@@H](C)Oc1ccc(Oc2ncc(Cl)cc2F)cc1
TOX12355	1	CC1(C)CON(Cc2ccccc2Cl)C1=O
TOX12356	0	CCSC(=O)N(CC)C1CCCCC1
TOX12358	0	CCNC(=O)NC(=O)/C(C#N)=N/OC
TOX1236	1	Nc1ccc(NCCO)c([N+](=O)[O-])c1
TOX12361	0	N#CC(Br)(Br)C(N)=O
TOX12365	0	N#Cc1c(Cl)cccc1Cl
TOX1237	1	COC(=O)[C@H]1[C@H]2C[C@@H]3c4[nH]c5cc(OC)ccc5c4CCN3C[C@H]2C[C@@H](OC(=O)c2cc(OC)c(OC)c(OC)c2)[C@@H]1OC
TOX12375	0	C/C(=N\NC(=O)Nc1cc(F)cc(F)c1)c1ncccc1C(=O)[O-]
TOX12376	1	COCC(C)N(C(=O)CCl)c1c(C)csc1C
TOX12379	0	CSC(=O)c1c(C(F)F)nc(C(F)(F)F)c(C(=O)SC)c1CC(C)C
TOX1238	0	Oc1cccc(O)c1
TOX12386	1	C=C(C)CN(CC)c1c([N+](=O)[O-])cc(C(F)(F)F)cc1[N+](=O)[O-]
TOX12390	1	OC(c1ccc(Cl)cc1)(c1cncnc1)c1ccccc1Cl
TOX12392	1	CCOC(=O)C(C)Oc1ccc(Oc2nc3ccc(Cl)cc3o2)cc1
TOX12398	1	N#Cc1c[nH]cc1-c1cccc2c1OC(F)(F)O2
TOX1240	1	CC(=O)OC/C=C(C)/C=C/C=C(C)/C=C/C1=C(C)CCCC1(C)C
TOX12405	1	CNC(=O)Oc1cccc(N=CN(C)C)c1
TOX12406	0	CCOP(=O)([O-])C(N)=O
TOX1241	1	CCCCCCCCCCCCCCCC(=O)OC/C=C(C)/C=C/C=C(C)/C=C/C1=C(C)CCCC1(C)C
TOX12412	0	COC(=O)c1ccc(C)cc1C1=NC(=O)C(C)(C(C)C)N1
TOX12416	1	CSc1nc(NC2CC2)nc(NC(C)(C)C)n1
TOX12417	1	CCOP(=S)(NC(C)C)Oc1ccccc1C(=O)OC(C)C
TOX12424	1	CS(=O)(=O)c1ccc(C(=O)C2C(=O)CCCC2=O)c([N+](=O)[O-])c1
TOX12431	1	CCc1cccc(C)c1N(C(=O)CCl)[C@@H](C)COC
TOX12437	1	O=C(O)c1ccccc1C(=O)Nc1cccc2ccccc12
TOX1244	1	CO[C@H]1C=CO[C@@]2(C)Oc3c(C)c(O)c4c(O)c(c(/C=N/N5CCN(C)CC5)c(O)c4c3C2=O)NC(=O)C(C)=CC=C[C@H](C)[C@H](O)[C@@H](C)[C@@H](O)[C@@H](C)[C@H](OC(C)=O)[C@@H]1C
TOX12442	0	O=[N+]([O-])/N=C1\NCCN1Cc1ccc(Cl)nc1
TOX12459	1	CCOP(=S)(OCC)SCSCC
TOX1246	1	Cc1cc(C(=C2C=CC(=N)C=C2)c2ccc(N)cc2)ccc1N
TOX12464	1	CCCSP(=O)(OCC)Oc1ccc(Br)cc1Cl
TOX12470	1	CCNP(=S)(OC)O/C(C)=C/C(=O)OC(C)C
TOX12474	1	CC1CCCCC1NC(=O)Nc1ccccc1
TOX12482	1	CCOP(=S)(Oc1cnc(C(C)(C)C)nc1)OC(C)C
TOX12488	0	COC(=O)c1c(C(F)F)nc(C(F)(F)F)c(C2=NCCS2)c1CC(C)C
TOX12493	1	CC(C)(C)C(O)C(Oc1ccc(Cl)cc1)n1cncn1
TOX12497	0	O=C(O)COc1nc(Cl)c(Cl)cc1Cl
TOX1251	0	O=C1NS(=O)(=O)c2ccccc21
TOX12511	0	CCN1CN(CC)CN(CC)C1
TOX12513	0	Cc1cc(C)n(CO)n1
TOX12514	1	O=Cc1ccccc1C=O
TOX12516	0	CCCCCCCCSCCO
TOX12519	0	CSC(=O)c1cccc2nnsc12
TOX1253	1	O=C1[N-]S(=O)(=O)c2ccccc21
TOX12532	1	CCOC(=O)C(Cl)Cc1cc(-n2nc(C)n(C(F)F)c2=O)c(F)cc1Cl
TOX12535	0	CCOC(=O)C1CC(=O)C(=C(O)C2CC2)C(=O)C1
TOX12536	0	CC(C)=CC1C(C(=O)OC(C#N)c2cccc(Oc3ccccc3)c2)C1(C)C
TOX1254	0	C=CCc1ccc2c(c1)OCO2
TOX12544	0	CCCOC(=O)c1ccc(C(=O)OCCC)nc1
TOX12547	0	CCOc1nc(C(Cl)(Cl)Cl)ns1
TOX12549	1	CC1(C(=O)Nc2ccc(O)c(Cl)c2Cl)CCCCC1
TOX1255	0	CC(C)(C)NCC(O)c1ccc(O)c(CO)c1
TOX12552	1	CC(C)N(C(=O)COc1nnc(C(F)(F)F)s1)c1ccc(F)cc1
TOX12553	1	CCN(Cc1c(F)cccc1Cl)c1c([N+](=O)[O-])cc(C(F)(F)F)cc1[N+](=O)[O-]
TOX12554	0	CCCCCOC(=O)COc1cc(N2C(=O)C3=C(CCCC3)C2=O)c(F)cc1Cl
TOX12555	1	C#CCN1C(=O)COc2cc(F)c(N3C(=O)C4=C(CCCC4)C3=O)cc21
TOX12556	0	COC(=O)CSc1cc(/N=c2\sc(=O)n3n2CCCC3)c(F)cc1Cl
TOX12559	1	CC1(C)[C@@H](/C=C(\Cl)C(F)(F)F)[C@H]1C(=O)O[C@H](C#N)c1cccc(Oc2ccccc2)c1
TOX1256	0	O=C(O)c1cc(/N=N/c2ccc(S(=O)(=O)Nc3ccccn3)cc2)ccc1O
TOX12569	0	Cc1nc(N(C)C)nc(OC(=O)N(C)C)c1C
TOX12577	0	Cc1c(F)c(F)c(COC(=O)C2C(/C=C(\Cl)C(F)(F)F)C2(C)C)c(F)c1F
TOX12579	0	CCCCOCCOC(=O)COc1nc(Cl)c(Cl)cc1Cl
TOX1258	1	CN1[C@H]2C[C@H](OC(=O)[C@H](CO)c3ccccc3)C[C@@H]1[C@H]1O[C@@H]21
TOX12582	0	NCCO.O=C(O)c1nc(Cl)ccc1Cl
TOX12589	1	O=c1oc2ccccc2c(O)c1C(CC(O)c1ccc(-c2ccc(Br)cc2)cc1)c1ccccc1
TOX12591	0	CC1(C)C(=O)N(Cl)C(=O)N1Br
TOX12605	0	COC(=O)C(C)Oc1ccc(Oc2ccc(Cl)cc2Cl)cc1
TOX12610	0	CCOc1ccc(C(C)(C)COCc2cccc(Oc3ccccc3)c2)cc1
TOX12611	0	CCCSP(=O)(OCC)SCCC
TOX12613	1	COP(=S)(OC)Oc1ccc([N+](=O)[O-])c(C)c1
TOX12614	0	CCCN(CCCl)c1c([N+](=O)[O-])cc(C(F)(F)F)cc1[N+](=O)[O-]
TOX12615	0	Cc1ccn2nc(S(=O)(=O)Nc3c(F)cccc3F)nc2n1
TOX12619	1	CC(C)(C)N(NC(=O)c1ccc(Cl)cc1)C(=O)c1ccccc1
TOX12622	0	Cc1cc(=O)[nH]o1
TOX12623	0	O=C(O)CCCc1c[nH]c2ccccc12
TOX12624	0	C#CCOC(=O)/C=C(C)/C=C/CC(C)CCCC(C)C
TOX12627	1	COC(C)(C)CCCC(C)C/C=C/C(C)=C/C(=O)OC(C)C
TOX12628	0	COc1cccc(C(=O)NN(C(=O)c2cc(C)cc(C)c2)C(C)(C)C)c1C
TOX12630	1	c1ccc(CNc2[nH]cnc3ncnc2-3)cc1
TOX12631	0	COCC(=O)N(c1c(C)cccc1C)N1CCOC1=O
TOX12637	0	CC1=NNC(=O)N(/N=C/c2cccnc2)C1
TOX12641	0	O=C(O)c1c(Cl)ccc2cc(Cl)cnc12
TOX12645	0	Cc1nn(-c2cc(NS(C)(=O)=O)c(Cl)cc2Cl)c(=O)n1C(F)F
TOX12646	1	CCNS(=O)(=O)C(F)(F)C(F)(F)C(F)(F)C(F)(F)C(F)(F)C(F)(F)C(F)(F)C(F)(F)F
TOX12647	1	N#CSCSc1nc2ccccc2s1
TOX12655	1	CC1(C)CCC(=Cc2ccc(Cl)cc2)C1(O)Cn1cncn1
TOX12667	0	CC(C)[C@H](C(=O)O[C@H](C#N)c1cccc(Oc2ccccc2)c1)c1ccc(Cl)cc1
TOX12673	0	COc1cc(OC)nc(Sc2cccc(Cl)c2C(=O)[O-])n1
TOX12675	1	CCCSP(=S)(OCC)Oc1ccc(SC)cc1
TOX1268	0	CCNc1nc(Cl)nc(NCC)n1
TOX12688	0	CC(C)=CC1C(C(=O)OCc2cccc(Oc3ccccc3)c2)C1(C)C
TOX127	1	Cc1cn([C@H]2C[C@H](N=[N+]=[N-])[C@@H](CO)O2)c(=O)[nH]c1=O
TOX12722	1	c1nc[n-]n1
TOX12759	1	Oc1ccc(O)c2c(O)cccc12
TOX1277	1	C/C=C/C=C/C(=O)O
TOX128	0	CCC1(CC)C(=O)N=C([O-])NC1=O
TOX12811	0	CCC(C)(C)C(=O)O
TOX12813	0	CCC(O)C(C)(C)C
TOX1282	0	CN(N=O)C(=O)N[C@H]1[C@@H](O)O[C@H](CO)[C@@H](O)[C@@H]1O
TOX12832	0	O=C(O)C(Br)CBr
TOX1284	0	C=Cc1ccccc1
TOX1286	0	c1ccc(C2CO2)cc1
TOX12869	0	O=[N+]([O-])c1ccc(F)cc1F
TOX1287	0	O=C1CCC(=O)O1
TOX12878	0	CC(O)CC(C)O
TOX1288	0	OC[C@H]1O[C@H](O[C@]2(CO)O[C@H](CO)[C@@H](O)[C@@H]2O)[C@H](O)[C@@H](O)[C@@H]1O
TOX1289	1	C=C(Cl)CSC(=S)N(CC)CC
TOX12891	0	O=C(Cl)c1c(Cl)cccc1Cl
TOX129	0	O=C1CC(=O)NC(=O)N1
TOX1290	1	Cc1cc(C)nc(NS(=O)(=O)c2ccc(N)cc2)n1
TOX1291	0	O=S(=O)([O-])[O-].[Na+].[Na+]
TOX1292	1	Cc1noc(NS(=O)(=O)c2ccc(N)cc2)c1C
TOX1294	0	O=S1(=O)CC=CC1
TOX12954	0	CC(C)(O)C(=O)O
TOX1296	1	CCCCC1(COC(=O)CCC(=O)O)C(=O)N(c2ccccc2)N(c2ccccc2)C1=O
TOX1299	1	COc1ccc(C(Cl)=C(c2ccc(OC)cc2)c2ccc(OC)cc2)cc1
TOX12998	0	O=C(O)CCSSCCC(=O)O
TOX1304	1	NCCS(=O)(=O)O
TOX13047	0	CSc1ccc(C=O)cc1
TOX1305	0	O=c1[nH]c(=O)n(C2CCCO2)cc1F
TOX13058	0	Nn1cnnc1
TOX1307	0	ClC=CCCl
TOX1309	0	CN1C(=O)C(O)N=C(c2ccccc2)c2cc(Cl)ccc21
TOX13096	0	O=C(O)CNC(=O)c1ccc(CO)o1
TOX13098	0	O=C(O)c1ccc(CO)o1
TOX131	1	[Ba+2]
TOX13105	0	O=c1[nH]c(=O)n([C@H]2C[C@H](O)[C@@H](CO)O2)cc1Br
TOX1311	1	CC(C)(C)c1cc(C(C)(C)C)c(O)c(C(C)(C)C)c1
TOX1312	1	Nc1ccc(-c2ccc(N)c(N)c2)cc1N
TOX1314	1	Nc1cc(Cl)c(-c2cc(Cl)c(N)cc2Cl)cc1Cl
TOX1315	1	Clc1cc2c(cc1Cl)Oc1cc(Cl)c(Cl)cc1O2
TOX1316	1	O=S(=O)(c1ccc(Cl)cc1)c1cc(Cl)c(Cl)cc1Cl
TOX13161	0	CNC(=O)O/N=C/C(C)(C)S(C)=O
TOX1317	0	ClCC(Cl)(Cl)Cl
TOX13179	0	O=C(O)CCC(=O)C(=O)O
TOX1318	0	ClC(Cl)C(Cl)Cl
TOX13187	0	CN(C)CCC=C1c2ccccc2CCc2ccccc21
TOX1319	0	ClC(Cl)=C(Cl)Cl
TOX1322	1	CCN(CC)C(=S)SSC(=S)N(CC)CC
TOX13241	0	CC(=O)CCc1ccccc1
TOX13264	0	FB(F)F
TOX13276	0	CCCOCC(C)OCC(C)O
TOX1328	0	C1CCOC1
TOX1330	1	OC[P+](CO)(CO)CO
TOX1331	1	OC[P+](CO)(CO)CO.OC[P+](CO)(CO)CO
TOX13326	1	CCC(Cl)CC(Cl)C(Cl)C(Cl)C(Cl)C(C)Cl
TOX13332	0	O=C(/C=C/c1ccc(O)c(O)c1)O[C@@H](C(=O)O)[C@@H](OC(=O)/C=C/c1ccc(O)c(O)c1)C(=O)O
TOX13334	1	C[C@@H]1CC2(OC3C[C@@]4(C)C5=CC[C@H]6C(C)(C)C(O[C@@H]7OC[C@@H](O)[C@H](O)[C@H]7O)CC[C@@]67C[C@@]57CC[C@]4(C)C31)OC(O)C1(C)OC21
TOX1334	1	O=[N+]([O-])C([N+](=O)[O-])([N+](=O)[O-])[N+](=O)[O-]
TOX1336	1	Cn1c(=O)c2[nH]cnc2n(C)c1=O
TOX1337	1	c1ccc2[nH]c(-c3cscn3)nc2c1
TOX13371	0	OC1CCCC1
TOX1338	0	CS(=O)(=O)c1ccc([C@@H](O)[C@@H](CO)NC(=O)C(Cl)Cl)cc1
TOX13389	0	C[C@H](CCC(=O)[O-])[C@H]1CC[C@H]2[C@@H]3CC[C@@H]4C[C@H](O)CC[C@]4(C)[C@H]3C[C@H](O)[C@@]21C
TOX1339	1	S=P(N1CC1)(N1CC1)N1CC1
TOX134	0	O=Cc1ccccc1
TOX1340	0	CC(N)=S
TOX13401	0	O=C(O[C@@H](C(=O)O)[C@@H](OC(=O)c1ccccc1)C(=O)O)c1ccccc1
TOX13402	0	O=P(O)(OCc1ccccc1)OCc1ccccc1
TOX13433	0	COC1=CC(=O)OC(CCc2ccccc2)C1
TOX1344	1	Nc1ccc(Sc2ccc(N)cc2)cc1
TOX13445	1	CN(C)CCCNCCCN
TOX13447	0	CC(C)N(C)C
TOX1346	1	NNC(N)=S
TOX13469	0	C[C@@H]1O[C@@H](O[C@@H]2[C@@H](O)[C@H](OCCc3ccc(O)c(O)c3)O[C@H](CO[C@@H]3O[C@H](CO)[C@@H](O)[C@H](O)[C@H]3O)[C@H]2OC(=O)/C=C/c2ccc(O)c(O)c2)[C@H](O)[C@H](O)[C@H]1O
TOX1347	0	O=c1cc[nH]c(=S)[nH]1
TOX1348	1	NC(N)=S
TOX13493	0	CCOC(=O)C(C)C(C)=O
TOX135	0	c1ccccc1
TOX1351	0	[SnH2+2]
TOX13511	0	O=S(=O)(O)F
TOX13512	1	C[C@]1(O)CC[C@H]2[C@@H]3CCC4=CC(=O)CC[C@]4(C)[C@@]3(F)[C@@H](O)C[C@@]21C
TOX13519	1	O=C(Cl)/C=C/C(=O)Cl
TOX13538	1	C/C=C1/C(=O)C[C@H]2[C@@H]3CCC4=CC(=O)CC[C@]4(C)[C@H]3CC[C@]12C
TOX1354	0	C1=CCC([Ti+2]C2=CC=CC2)=C1
TOX1356	0	CC(=O)Oc1c(C)c(C)c2c(c1C)CC[C@@](C)(CCC[C@H](C)CCC[C@H](C)CCCC(C)C)O2
TOX13562	1	CC(C)(O)C(=O)Nc1ccc([N+](=O)[O-])c(C(F)(F)F)c1
TOX13564	0	CC1=C2[C@H](/C=C(\C)C(=O)O)CC[C@@H](C)[C@H]2[C@H](O)C1
TOX13566	1	Cl[In](Cl)Cl
TOX1358	1	Cc1ccc(S(=O)(=O)NC(=O)NN2CCCCCC2)cc1
TOX1359	0	CCCCNC(=O)NS(=O)(=O)c1ccc(C)cc1
TOX13595	1	COC1=CC(=O)O[C@@H](/C=C/c2ccccc2)C1
TOX1360	0	Cc1ccccc1
TOX1361	1	Cc1ccc(N=C=O)cc1N=C=O
TOX1362	0	Cc1ccccc1S(N)(=O)=O
TOX1363	1	Cc1cccc(N)c1
TOX1364	1	Cc1ccccc1N
TOX13649	0	COC(=O)CC#N
TOX1365	1	Cc1ccc(N)cc1
TOX1366	0	Cc1ccc(NC(N)=O)cc1
TOX13664	1	C[C@]1(O)CC[C@H]2[C@@H]3CCC4=CC(=O)CC[C@]4(C)[C@H]3CC[C@@]21C
TOX13673	0	COC(=O)CS
TOX137	1	Nc1ccc(-c2ccc(N)cc2)cc1
TOX13701	0	CN(C)CCCCCCN(C)C
TOX1371	1	CC1(C)O[C@@H]2C[C@H]3[C@@H]4CCC5=CC(=O)C=C[C@]5(C)[C@@]4(F)[C@@H](O)C[C@]3(C)[C@]2(C(=O)CO)O1
TOX1372	1	Nc1ccc(Oc2ccc(N)c(N)c2)cc1
TOX1374	0	BrC(Br)Br
TOX1375	0	CCCCCCCC(=O)OCC(COC(=O)CCCCCCC)OC(=O)CCCCCCC
TOX13754	0	C=CC(=O)NC(C)C
TOX13757	1	CC(=O)Oc1ccccc1C(=O)Nc1ncc([N+](=O)[O-])s1
TOX1377	0	FC(F)(Cl)C(F)(Cl)Cl
TOX1378	0	O=C(O)C(Cl)(Cl)Cl
TOX1379	0	Nc1c(Cl)cc(Cl)cc1Cl
TOX1380	0	ClCC(Cl)Cl
TOX1381	0	CC(Cl)(Cl)Cl
TOX1382	0	ClC=C(Cl)Cl
TOX13825	0	CO[Si](CCCNCCC[Si](OC)(OC)OC)(OC)OC
TOX1384	1	FC(Cl)(Cl)Cl
TOX1385	1	O=C1c2ccccc2C(=O)N1SC(Cl)(Cl)Cl
TOX1386	1	Oc1c(Cl)cc(Cl)cc1Cl
TOX13863	0	C=Cc1ccc(C=C)cc1
TOX1387	1	CC(Oc1cc(Cl)c(Cl)cc1Cl)C(=O)O
TOX13876	0	BrCCc1ccccc1
TOX1388	1	O=C(O)COc1cc(Cl)c(Cl)cc1Cl
TOX1389	1	COP(=O)(OC)C(O)C(Cl)(Cl)Cl
TOX13896	0	ClP(Cl)(Cl)(Cl)Cl
TOX1390	1	ClCC(Cl)CCl
TOX1391	1	Cc1ccc(OP(=O)(Oc2ccc(C)cc2)Oc2ccc(C)cc2)cc1
TOX1392	0	OCCN(CCO)CCO
TOX13923	0	CC12CC1(C)C(=O)N(c1cc(Cl)cc(Cl)c1)C2=O
TOX1393	0	OCCOCCOCCO
TOX1395	1	CCCN(CCC)c1c([N+](=O)[O-])cc(C(F)(F)F)cc1[N+](=O)[O-]
TOX1396	0	CN1C(=O)OC(C)(C)C1=O
TOX13979	0	C[C@H](CCC(=O)[O-])[C@H]1CC[C@H]2[C@H]3[C@H](C[C@H](O)[C@@]21C)[C@@]1(C)CC[C@@H](O)C[C@H]1C[C@H]3O
TOX1398	0	Cc1cc(C)c(N)cc1C
TOX13983	0	O=S(=O)([O-])O.[Na+]
TOX13989	1	Cc1cc(CC(=O)[O-])n(C)c1C(=O)c1ccc(Cl)cc1
TOX14	0	CC(=O)C1C(=O)C=C(C)OC1=O
TOX14005	0	NS(=O)(=O)O
TOX1402	0	Cc1ccc(C)c(C)c1
TOX1403	0	COP(=O)(OC)OC
TOX1404	0	CNC(=S)N(C)C
TOX1405	1	Cc1c([N+](=O)[O-])c(C)c([N+](=O)[O-])c(C(C)(C)C)c1[N+](=O)[O-]
TOX14070	0	O=C(Cl)C(Cl)(Cl)Cl
TOX14085	1	CC(C)(C)CC(C)(C)c1ccc(OCCO)cc1
TOX14087	1	NCCc1ccc(O)cc1
TOX14089	1	CC1=C2[C@H](/C=C(\C)C(=O)O)CC[C@@H](C)[C@H]2CC1
TOX14095	0	COc1ccc(CCN(C)CCCC(C#N)(c2ccc(OC)c(OC)c2)C(C)C)cc1OC
TOX141	0	c1ccc2occc2c1
TOX1411	0	O=P(OCCCl)(OCCCl)OCCCl
TOX14113	1	C[C@]12CC[C@H]3[C@@H](CCC4=C(O)C(=O)CC[C@@]43C)[C@@H]1CCC2=O
TOX1414	1	CCCCC(CC)COP(=O)(OCC(CC)CCCC)OCC(CC)CCCC
TOX1415	1	CC(O)CN(CC(C)O)CC(C)O
TOX14150	0	O=C(CCCN1CCC(O)(c2ccc(Cl)cc2)CC1)c1ccc(F)cc1
TOX14165	1	CC1(C)NC(=O)N(c2ccc([N+](=O)[O-])c(C(F)(F)F)c2)C1=O
TOX1418	1	NC(Cc1c[nH]c2ccccc12)C(=O)O
TOX14186	1	CC(=O)S[C@@H]1CC2=CC(=O)CC[C@]2(C)[C@H]2CC[C@@]3(C)[C@@H](CC[C@@]34CCC(=O)O4)[C@@H]21
TOX1419	1	N[C@@H](Cc1c[nH]c2ccccc12)C(=O)O
TOX14192	1	C[C@]12C=CC3=C4CCC(=O)C=C4CC[C@H]3[C@@H]1CC[C@@H]2O
TOX142	1	Nc1nc(N)nc(-c2ccccc2)n1
TOX1421	1	COc1cc(/C=C/C(=O)CC(=O)/C=C/c2ccc(O)c(OC)c2)ccc1O
TOX14212	0	CCCN(CC)CC1COC2(CCC(C(C)(C)C)CC2)O1
TOX14227	0	CCC(C)OC(=O)N1CCCCC1CCO
TOX14229	0	CCCCCC1CCC(=O)O1
TOX14232	0	CC(Oc1cccc(Cl)c1)C(=O)O
TOX1424	0	O=c1cc[nH]c(=O)[nH]1
TOX14250	1	CCOP(=O)(OCC)OC(=CCl)c1ccc(Cl)cc1Cl
TOX14252	0	CC/C(=N\OC/C=C/Cl)C1=C(O)CC(C2CCOCC2)CC1=O
TOX14255	0	NC(=O)CF
TOX1426	0	NC(N)=O
TOX1427	0	CCOC(N)=O
TOX14270	0	Cc1cnc(C2=NC(=O)C(C)(C(C)C)N2)c(C(=O)O)c1
TOX14282	0	O=C(O)COc1ccc(Cl)cc1
TOX14286	1	Cn1sc(Cl)cc1=O
TOX14287	0	CCCCCCCC1CCC(=O)O1
TOX143	1	O=C(O)c1ccccc1
TOX14300	0	CC(=NC#N)N(C)Cc1ccc(Cl)nc1
TOX14303	1	CCCCCCC(C)OC(=O)COc1nc(F)c(Cl)c(N)c1Cl
TOX1431	0	C=COC(C)=O
TOX14324	1	CCOP(=S)(OCC)O/N=C(\C#N)c1ccccc1
TOX14338	0	COc1ccc(C(O)(c2cncnc2)C2CC2)cc1
TOX14355	1	O=C(NC(=O)c1ccccc1Cl)Nc1ccc(OC(F)(F)F)cc1
TOX14357	1	O=C(NC(=O)c1c(F)cccc1F)Nc1cc(Cl)c(OC(F)(F)C(F)C(F)(F)F)cc1Cl
TOX1436	0	C=Cc1cccc(C)c1
TOX14365	0	C=CCOC(=O)C(C)(C)OC(=O)c1cc(-n2c(=O)cc(C(F)(F)F)n(C)c2=O)ccc1Cl
TOX1437	0	C=CC1CC=CCC1
TOX14376	0	CC[N+](CC)(CC(=O)Nc1c(C)cccc1C)Cc1ccccc1.O=C([O-])c1ccccc1
TOX1438	0	C=C(Cl)Cl
TOX14382	0	CC(C)=C[C@@H]1[C@@H](C(=O)OCc2coc(Cc3ccccc3)c2)C1(C)C
TOX14383	0	COc1cc(OC)nc(Oc2cccc(Oc3nc(OC)cc(OC)n3)c2C(=O)[O-])n1
TOX14392	0	O=C(Nc1ccccc1-c1ccc(Cl)cc1)c1cccnc1Cl
TOX144	0	O=C(c1ccccc1)C(O)c1ccccc1
TOX1440	0	C=CN1CCCC1=O
TOX1442	1	OCC(CO)N[C@H]1C[C@](O)(CO)[C@@H](O)[C@H](O)[C@H]1O
TOX14456	0	Cc1ccccc1CO[C@H]1C[C@]2(C(C)C)CC[C@@]1(C)O2
TOX1446	1	Cc1cccc(C)c1
TOX14465	0	CN/C(=N\[N+](=O)[O-])NCc1cnc(Cl)s1
TOX1448	1	Cc1ccc(N)c(C)c1
TOX14490	0	N#CN
TOX145	1	O=C1C=CC(=O)C=C1
TOX14503	0	CCCCOC(=O)[C@@H](C)Oc1ccc(Oc2ccc(C#N)cc2F)cc1
TOX14518	1	CCOC(=O)Nc1cccc(OC(=O)Nc2ccccc2)c1
TOX14528	1	CCOc1nc(F)cc2nc(S(=O)(=O)Nc3c(Cl)cccc3Cl)nn12
TOX14531	1	CCOC(=O)NC(=S)Nc1ccccc1NC(=S)NC(=O)OCC
TOX14540	0	CC1(C)OC[C@@H]2O[C@@]3(C(=O)[O-])OC(C)(C)O[C@H]3[C@@H]2O1
TOX14549	0	CN/C(=N/[N+](=O)[O-])NCC1CCOC1
TOX1455	0	O=C([O-])c1[nH]n(-c2ccc(S(=O)(=O)[O-])cc2)c(=O)c1/N=N/c1ccc(S(=O)(=O)[O-])cc1
TOX1456	0	O=S(=O)([O-])c1ccc(/N=N/c2c(O)ccc3cc(S(=O)(=O)[O-])ccc23)cc1
TOX1457	1	CC(/C=C/C=C(\C)C(=O)O[C@@H]1O[C@H](CO[C@@H]2O[C@H](CO)[C@@H](O)[C@H](O)[C@H]2O)[C@@H](O)[C@H](O)[C@H]1O)=C\C=C\C=C(C)\C=C\C=C(/C)C(=O)O[C@@H]1O[C@H](CO[C@@H]2O[C@H](CO)[C@@H](O)[C@H](O)[C@H]2O)[C@@H](O)[C@H](O)[C@H]1O
TOX1458	0	O=[N+]([O-])c1ccc(NCCO)c(OCCO)c1
TOX14580	1	CCOC1Oc2ccc(OS(C)(=O)=O)cc2C1(C)C
TOX14583	0	CCOC(=O)Cc1cccc2ccccc12
TOX14598	0	CCOC(=O)[C@@H](C)Oc1ccc(Oc2nc3ccc(Cl)cc3o2)cc1
TOX146	1	c1ccc2sc(SSc3nc4ccccc4s3)nc2c1
TOX1460	1	C[C@H]1CCCC(=O)CCCC=Cc2cc(O)cc(O)c2C(=O)O1
TOX14601	0	CC(Cc1ccc(C(C)(C)C)cc1)CN1C[C@H](C)O[C@H](C)C1
TOX1461	0	[Zn+2]
TOX14612	1	CCCCOC(=O)C(C)Oc1ccc(Oc2ccc(C(F)(F)F)cn2)cc1
TOX14614	0	COc1nn(C(=O)[N-]S(=O)(=O)c2ccccc2OC(F)(F)F)c(=O)n1C
TOX14618	0	CCOC(=O)COc1cc(-n2ncc(C(F)(F)F)c(C)c2=O)c(F)cc1Cl
TOX1462	1	CCCCN(CCCC)C(=S)[S-].CCCCN(CCCC)C(=S)[S-].[Zn+2]
TOX14627	0	Nc1c(Cl)c(F)nc(OCC(=O)O)c1Cl
TOX14664	0	COCc1cnc(C2=NC(C)(C(C)C)C(=O)N2)c(C(=O)O)c1
TOX14665	0	CC(C)C1(C)N=C(c2ncccc2C(=O)O)NC1=O
TOX14669	0	C#CCN1CC(=O)N(COC(=O)[C@@H]2[C@@H](C=C(C)C)C2(C)C)C1=O
TOX14673	0	COC(=O)c1ccc(I)cc1S(=O)(=O)[N-]C(=O)Nc1nc(C)nc(OC)n1
TOX14676	1	CCOP(=S)(OCC)Oc1nc(Cl)n(C(C)C)n1
TOX14698	0	CCCCC(CC)COC(=O)COc1ccc(Cl)cc1C
TOX147	1	c1ccc2[nH]nnc2c1
TOX14700	0	Cc1cc(Cl)ccc1OCC(=O)[O-]
TOX1472	0	CCOC(=O)N(C)N=O
TOX14722	0	Cc1c(C(=O)c2cnn(C)c2O)ccc(S(C)(=O)=O)c1C1=NOCC1
TOX14723	0	CS(=O)(=O)c1cc(C(F)(F)F)ccc1C(=O)c1cnoc1C1CC1
TOX14729	0	COC(=O)C1(O)c2ccccc2-c2ccccc21
TOX14764	0	COc1cc(OC)nc(NC(=O)NS(=O)(=O)c2ncccc2C(=O)N(C)C)n1
TOX14769	1	CCCCCCCCC(=O)NCc1ccc(O)c(OC)c1
TOX1477	0	F[B-](F)(F)F
TOX14776	1	COP(=S)(OC)Oc1c(Cl)cc(C)cc1Cl
TOX1478	1	C#C[C@@]1(O)CC[C@H]2[C@@H]3CCC4=CCCC[C@@H]4[C@H]3CC[C@@]21C
TOX1479	1	CC(=O)Nc1ccc2c(c1)Cc1cc(NC(C)=O)ccc1-2
TOX148	1	ClC(Cl)(Cl)c1ccccc1
TOX14803	0	COc1cnc(OC)n2nc(NS(=O)(=O)c3c(OCC(F)F)cccc3C(F)(F)F)nc12
TOX14816	0	CNC(=O)/C=C(\C)OP(=O)(OC)OC
TOX14818	1	COP(=O)(OC)SCn1c(=O)oc2cc(Cl)cnc21
TOX1482	0	CC(C)=O
TOX1483	1	O=CCc1ccccc1
TOX14833	1	O=C([O-])Cc1cccc2ccccc12
TOX14836	0	[I-].[K+]
TOX1484	0	O=C(O)c1ccccc1C(=O)O
TOX14844	0	CC(C)(C#N)Nc1nc(Cl)nc(NC2CC2)n1
TOX1485	0	O=C(O)c1cccc(C(=O)O)c1
TOX14855	1	CCCCOC(=O)[C@@H](C)Oc1ccc(Oc2ccc(C(F)(F)F)cn2)cc1
TOX1486	0	O=C(O)c1cccc(C(=O)O)c1C(=O)O
TOX14864	0	CCCOc1nn(C(=O)[N-]S(=O)(=O)c2ccccc2C(=O)OC)c(=O)n1C
TOX1487	0	O=C(O)c1ccc(C(=O)O)c(C(=O)O)c1
TOX14871	1	CCOC(=O)COc1cc(-c2nn(C)c(OC(F)F)c2Cl)c(F)cc1Cl
TOX14872	0	Nc1cnn(-c2ccccc2)c(=O)c1Cl
TOX14877	1	Cc1cc(C)nc(Nc2ccccc2)n1
TOX1488	0	O=C(O)c1cc(C(=O)O)cc(C(=O)O)c1
TOX14881	1	Fc1ccc(Oc2ccnc3cc(Cl)cc(Cl)c23)cc1
TOX14885	1	COP(=S)(OC)Oc1cc(Cl)c(Cl)cc1Cl
TOX149	1	NNC(=O)c1ccccc1
TOX14903	0	[Br-].[Na+]
TOX1491	0	N#Cc1ccccc1
TOX1492	0	N#CCc1ccccc1
TOX14924	0	O=C([O-])C(Cl)(Cl)Cl
TOX14928	1	CCC(C)(C)C(=O)OC1=C(c2cc(Cl)cc(Cl)c2)C(=O)OC12CCCCC2
TOX1493	1	CC(C)(C)C1=CC(=O)C=C(C(C)(C)C)C1=O
TOX14930	0	CCOP(=O)(SC(C)CC)N1CCSC1=O
TOX14936	0	COC(=O)c1ccccc1S(=O)(=O)NC(=O)Nc1nc(C)cc(C)n1
TOX14948	1	CCc1ccc(C(=O)NN(C(=O)c2cc(C)cc(C)c2)C(C)(C)C)cc1
TOX1495	0	O=C(O)CBr
TOX14957	0	CCOP(=O)(OCC)OP(=O)(OCC)OCC
TOX1496	0	N#CCBr
TOX14961	0	N#C/N=C1\SCCN1Cc1ccc(Cl)nc1
TOX14962	0	CN1COCN(Cc2cnc(Cl)s2)C1=N[N+](=O)[O-]
TOX14968	1	NC(=S)NC(N)=S
TOX14972	1	Cc1ccc(C(C)C)c(O)c1
TOX1498	1	Brc1nc2ccccc2s1
TOX1499	0	CCC(C)Br
TOX15	0	CC(=O)NNc1ccccc1
TOX15001	0	C=CCCCCCCCCC(=O)O
TOX15013	0	Cl[Zn]Cl
TOX1503	0	ClCBr
TOX151	0	CC(=O)OCc1ccccc1
TOX15106	0	NCCCC(=O)O
TOX1513	0	CCCC=O
TOX15138	0	Nc1ccc([As](=O)(O)O)cc1
TOX1515	0	CCCC(=O)O
TOX15152	0	CC1(C)C(=O)NC(=O)N1CO
TOX15156	0	CCC(=O)OCCc1ccccc1
TOX1516	0	CCC(C)=O
TOX15160	0	CC(=O)/C=C/C1C(C)=CCCC1(C)C
TOX15163	0	COc1ccc(OC)c(OC)c1
TOX1517	0	O=C(O)/C=C\C(=O)O
TOX15175	0	c1coc(CNc2[nH]cnc3ncnc2-3)c1
TOX1518	1	O=C(O)/C=C/C(=O)O
TOX15186	0	CC1=CC(=O)CCC1
TOX1519	0	CCCCOCCOCCO
TOX152	0	OCc1ccccc1
TOX1520	1	CCCCOCCOCCOCCO
TOX15206	1	C=CCSSCC=C
TOX15209	0	O=c1[nH]c(=O)c2c[nH]nc2[nH]1
TOX15214	0	C=CC(O)CCCCC
TOX1524	1	N#CCCl
TOX1526	1	O=C(O)CC(Cl)C(=O)O
TOX15266	0	CC/C=C\CCCCCCCCCCOC(C)=O
TOX15272	0	CC(C)c1ccc2cc(C(C)C)ccc2c1
TOX15285	1	C/C=C/C/C=C\CCCCCCCCOC(C)=O
TOX15286	0	CC/C=C/CCCCCCCCCCOC(C)=O
TOX15288	1	C/C=C/C=C/CCCCCCCO
TOX153	0	ClCc1ccccc1
TOX1530	0	O=C1CCCCC1Cl
TOX15305	0	CCCC/C=C/CCCCO
TOX15341	0	CC1(C)C(=O)N(Br)C(=O)N1Br
TOX154	1	Oc1ccc(Cl)cc1Cc1ccccc1
TOX15423	0	Cc1ccc(C)c2ccccc12
TOX1543	1	CCCCCCCCCl
TOX1544	0	Oc1ccccc1Cl
TOX1545	0	CC(Cl)C(=O)O
TOX1546	0	O=C(O)CCCl
TOX1547	0	CC(=O)CCl
TOX15481	0	CC(=O)CCc1ccc(OC(C)=O)cc1
TOX155	1	S=C=NCc1ccccc1
TOX1552	0	C1CCCCCCCCCCC1
TOX1553	0	CCCCCCCCCC=O
TOX1554	0	CCCCCCCCCC(=O)O
TOX15542	1	CCCCCCCCCCCCCCCCCC[N+](C)(C)CCC[Si](OC)(OC)OC
TOX1557	0	BrCBr
TOX15592	1	CCCCCCCC/C=C/CCCOC(C)=O
TOX156	1	N#CSCc1ccccc1
TOX1561	0	NC(=O)C(Cl)Cl
TOX15616	0	O=[N+]([O-])c1ccccc1[O-]
TOX15620	0	CC1=CC(=O)[C@H]2C[C@@H]1C2(C)C
TOX1563	1	Oc1cc(O)c(Cl)cc1Cl
TOX1565	0	CC(Cl)C(C)Cl
TOX15748	1	Cl/C=C\C[N+]12CN3CN(CN(C3)C1)C2
TOX1575	0	CC(Cl)(Cl)C(=O)O
TOX15753	0	CCCCN(CCC(=O)OCC)C(C)=O
TOX1576	0	CC(=O)C(Cl)Cl
TOX15783	1	COC(C)(C)CCC[C@H](C)C/C=C/C(C)=C/C(=O)OC(C)C
TOX15784	1	CCOC(=O)/C=C(C)/C=C/C[C@@H](C)CCCC(C)C
TOX1581	0	CC(C)(CC(=O)O)C(=O)O
TOX1583	0	CC(=O)C(C)=O
TOX1584	0	CC(C)=CC(=O)C=C(C)C
TOX1585	0	CC(C)(CCC(=O)O)C(=O)O
TOX1586	0	CC(=O)CCC=C(C)CCC=C(C)C
TOX1590	0	CCCCCCCCCCCC(=O)O
TOX1596	0	CCCCCCCCCCCCCCCCC(=O)O
TOX1597	0	CCCCCCC=O
TOX1598	0	O=C(O)CCCCCC(=O)O
TOX1599	0	CCCCCCC#N
TOX160	0	Cc1c(COC(=O)C2C(/C=C(\Cl)C(F)(F)F)C2(C)C)cccc1-c1ccccc1
TOX1600	0	CCCCCCC(=O)O
TOX1601	0	O=C(C(Cl)(Cl)Cl)C(Cl)(Cl)Cl
TOX1602	1	CCCCCCCCCCCCCCCC(=O)O
TOX1603	1	CCCCCC/C=C/CCCCCCCC(=O)O
TOX1604	0	CCCCCC=O
TOX1605	0	O=C(O)CCCCC(=O)O
TOX1607	0	CCCCCC(=O)O
TOX1608	1	CCCC(=O)CC
TOX161	0	c1ccc(-c2ccccc2)cc1
TOX1610	0	O=C(O)c1cccc(O)c1
TOX16105	0	CC(=O)OC1CCCCC1C(C)(C)C
TOX1615	0	CS(=O)(=O)Cl
TOX1617	0	Cc1cccc(C(=O)O)c1
TOX1618	0	Cc1ccc(C(=O)O)cc1
TOX1620	0	CC(C)CC#N
TOX1621	0	CCC(C)C(=O)O
TOX16226	0	CCCCCCCCOS(=O)(=O)[O-]
TOX16229	0	CCCCCCCCCCOS(=O)(=O)[O-]
TOX1626	1	CC(C)c1ccc(CO)cc1
TOX1627	0	Cc1ccc(C(=O)O)o1
TOX16288	0	CCCCCCCCCCC(CO)CCCCCCCC
TOX1629	0	CC(=O)CCC=C(C)C
TOX16299	0	CCCCCCCCN(C)C
TOX1631	0	Cc1cc(N)no1
TOX1632	0	CC(CCC(=O)O)C(=O)O
TOX1633	0	CCCC(C)C(=O)O
TOX1634	1	CCC(C)C(C)=O
TOX1635	0	CC(C)C=O
TOX1636	0	CC(C)C(=O)O
TOX1638	0	CC(Cl)(Cl)[N+](=O)[O-]
TOX1639	0	CCCCCCCCC=O
TOX164	0	OCC(CO)(CBr)CBr
TOX1640	1	O=C(O)CCCCCCCC(=O)O
TOX1641	0	CCCCCCCCC(=O)O
TOX1642	1	CCCCCCCCCCCCCCCCCC(=O)O
TOX1643	0	CCCCCCCC=O
TOX16435	0	CCCCCCCCN1CCCC1=O
TOX16438	1	Cc1cc(-n2nc3ccc(Cl)cc3n2)c(O)c(C(C)(C)C)c1
TOX1644	0	O=C(O)CCCCCCC(=O)O
TOX1645	0	CCCCCCCC(=O)O
TOX1646	0	O=C(O)CC(=O)C(=O)O
TOX1647	0	CCCC(=O)C(=O)O
TOX1648	0	CC(=O)CCC(=O)O
TOX16496	1	C#C[C@]1(O)CC[C@H]2[C@@H]3CCC4=CC(=O)CC[C@@H]4[C@H]3CC[C@@]21CC
TOX1650	1	CC(=O)C(=O)O
TOX16508	1	CC(=O)[C@@]1(O)CC[C@H]2[C@@H]3C[C@H](C)C4=CC(=O)CC[C@]4(C)[C@H]3CC[C@@]21C
TOX16514	1	C[C@@]12CCC[C@H]1[C@@H]1CC[C@H]3C[C@@H](O)CC[C@]3(C)[C@H]1CC2
TOX16515	1	CCC(=O)O[C@H]1CC[C@H]2[C@@H]3CCC4=CC(=O)CC[C@]4(C)[C@H]3CC[C@]12C
TOX1652	0	CCCCCCCCCCCCCCC(=O)O
TOX1653	0	CCCCC=O
TOX1654	0	O=C(O)CCCC(=O)O
TOX16541	1	CC(=O)[C@H]1CC[C@H]2[C@@H]3CC=C4C[C@@H](O)CC[C@]4(C)[C@H]3CC[C@]12C
TOX1655	1	CCCCC(=O)O
TOX1656	0	O=C(O)Cc1ccccc1
TOX1657	0	CC(=O)c1ccc(C(C)=O)cc1
TOX1658	0	CCC=O
TOX1659	1	O=C(O)CC(=O)O
TOX1660	0	ClC1=C(Cl)C1(Cl)Cl
TOX16646	0	CCCCCCC(O)CO
TOX1665	1	CCCCCCCCCCCCCC=O
TOX1666	0	CCCCCCCCCCCCCC(=O)O
TOX1668	1	O=C(O)C(Br)(Br)Br
TOX16690	0	CC(C)COC(=O)CCCCC(=O)OCC(C)C
TOX167	0	CC(CCl)OC(C)CCl
TOX1671	1	NC(=O)C(Cl)(Cl)Cl
TOX1672	0	N#CC(Cl)(Cl)Cl
TOX16760	1	O=C1O[Pt]2(N[C@@H]3CCCC[C@H]3N2)OC1=O
TOX168	0	ClCCOCCCl
TOX1683	0	O=C(O)CCCCCCCCCCCC(=O)O
TOX1684	0	CCCCCCCCCCCCC(=O)O
TOX1685	0	CC1=CC(=O)CC(C)(C)C1=O
TOX1688	1	CCCCCCCCCCC=O
TOX1689	0	CCCCCCCCCCC
TOX1690	0	CCCCCCCCCCC(=O)O
TOX16999	0	Nc1nc(=O)c2c([nH]1)NCC(CNc1ccc(C(=O)N[C@@H](CCC(=O)[O-])C(=O)[O-])cc1)N2C=O
TOX17044	0	CC1(C)S[C@@H]2[C@H](NC(=O)[C@H](N)c3ccc(O)cc3)C(=O)N2[C@H]1C(=O)O
TOX17072	0	CCCC(CCC)C(=O)[O-]
TOX1708	0	O=C([O-])c1ccccc1O
TOX1709	0	NC(=O)c1ccccc1
TOX1716	1	Oc1c(Cl)cc(Cl)c(Cl)c1Cl
TOX1717	1	Cc1cc(O)ccc1Cl
TOX1718	0	c1ccc(CC2=NCCN2)cc1
TOX17207	0	O=C([O-])C(Cl)Cl
TOX17208	1	O=C([O-])Cc1ccccc1Nc1c(Cl)cccc1Cl
TOX1721	0	O=C1C[C@@H]2OCC=C3CN4CC[C@]56c7ccccc7N1[C@H]5[C@H]2[C@H]3C[C@H]46.O=C1C[C@@H]2OCC=C3CN4CC[C@]56c7ccccc7N1[C@H]5[C@H]2[C@H]3C[C@H]46
TOX17231	1	CC(C(=O)O)c1ccc(-c2ccccc2)c(F)c1
TOX17236	1	N[C@H]1C(O)O[C@H](CO)[C@@H](O)[C@@H]1O
TOX17237	0	COc1ccc(Cl)cc1C(=O)NCCc1ccc(S(=O)(=O)NC(=O)NC2CCCCC2)cc1
TOX17248	0	COCCc1ccc(OCC(O)CNC(C)C)cc1.COCCc1ccc(OCC(O)CNC(C)C)cc1
TOX17250	1	CS(=O)(=O)Nc1ccc([N+](=O)[O-])cc1Oc1ccccc1
TOX1726	0	NC(=O)c1ccccc1O
TOX17262	1	CC(=O)[C@H]1[C@H](C#N)C[C@H]2[C@@H]3CC=C4C[C@@H](O)CC[C@]4(C)[C@H]3CC[C@@]21C
TOX17272	1	Nc1c2c(nc3ccccc13)CCCC2
TOX173	1	ClCOCCl
TOX17303	1	O=C(O)C(F)(F)C(F)(F)C(F)(F)C(F)(F)C(F)(F)C(F)(F)F
TOX1731	0	CO
TOX1735	1	CS(C)=O
TOX1739	0	CCCO
TOX1740	0	CCCCO
TOX1741	0	CCCCCO
TOX1744	0	CCCC(C)C1(CC)C(=O)N=C([S-])NC1=O
TOX17478	1	Cc1cccc2sc3nncn3c12
TOX17493	0	CCNc1nc(NC(C)C)nc(OC)n1
TOX17494	0	CC(C)Nc1nc(N)nc(Cl)n1
TOX17495	0	CCNc1nc(N)nc(Cl)n1
TOX175	1	Clc1cnc(Oc2ccc(Oc3ncc(Cl)cc3Cl)cc2)c(Cl)c1
TOX17508	0	Cc1cc(Cl)ccc1N=CN(C)C
TOX1751	0	OCC(F)(F)F
TOX17511	0	CCOP(=S)(OCC)SCCl
TOX17515	1	CNP(=O)(OC)Oc1ccc(C(C)(C)C)cc1Cl
TOX1752	0	CC(=O)C(C)(C)C
TOX17522	1	CCOP(=S)(OCC)SC(CCl)N1C(=O)c2ccccc2C1=O
TOX17523	0	CCOP(=O)(OCC)Oc1cc(C)nc(C(C)C)n1
TOX17527	0	CCOc1ccc(NC(=O)OC(C)C)cc1OCC
TOX17539	1	O=S1OC[C@@H]2[C@H](CO1)[C@]1(Cl)C(Cl)=C(Cl)[C@@]2(Cl)C1(Cl)Cl
TOX1754	0	CC1(C)NC(=O)NC1=O
TOX17541	1	O=S1(=O)OCC2C(CO1)C1(Cl)C(Cl)=C(Cl)C2(Cl)C1(Cl)Cl
TOX17545	0	CCSCc1ccccc1OC(=O)NC
TOX17551	0	CN(C)C(=O)Nc1ccccc1
TOX17565	1	Cc1ccccc1C(=O)Nc1cccc(OC(C)C)c1
TOX1757	0	C#CC1(O)CCCCC1
TOX17570	1	CNC(=O)N(C)c1nc2ccccc2s1
TOX17571	1	COP(=O)(OC)Oc1ccc([N+](=O)[O-])cc1
TOX17576	1	CON(C)C(=O)Nc1ccc(Cl)cc1
TOX17579	0	CC(C)OC(=O)c1cc(C(=O)OC(C)C)cc([N+](=O)[O-])c1
TOX1758	0	CCCCOCCOP(=O)(OCCOCCCC)OCCOCCCC
TOX17580	0	CNC(=O)CSP(=O)(OC)OC
TOX17582	1	CCS(=O)(=O)CCSP(=O)(OC)OC
TOX17584	1	Nc1c(Cl)c(Cl)c(Cl)c(Cl)c1Cl
TOX1759	0	CC(C)CO
TOX17594	1	CCNc1nc(NC(C)CC)nc(OC)n1
TOX17596	0	CCNc1nc(NCC)nc(SC)n1
TOX1761	0	CC(N)CN
TOX17612	1	CCOP(=S)(OCC)Oc1ncn(-c2ccccc2)n1
TOX17617	0	CNC(=O)Oc1cc(C)cc(C(C)C)c1
TOX1762	0	CCC(C)O
TOX17626	0	O=C(c1ccc(Cl)cc1)c1ccc(Cl)cc1
TOX1764	0	CC(O)CN
TOX17649	0	CC(=O)N(O)CCCCCNC(=O)CCC(=O)N(O)CCCCCNC(=O)CCC(=O)N(O)CCCCCN
TOX1767	0	COC(C)=O
TOX17672	0	CCCC(=O)[O-]
TOX17680	0	CCn1cc(C(=O)O)c(=O)c2cc(F)c(N3CCNCC3)cc21
TOX1769	0	CC(=O)/C=C/C1=C(C)CCCC1(C)C
TOX17696	0	CN/C=N/c1ccc(C)cc1C
TOX17697	0	Cc1ccc(NC=O)c(C)c1
TOX1770	1	CC(C)(c1cc(Cl)c(O)c(Cl)c1)c1cc(Cl)c(O)c(Cl)c1
TOX17706	0	O=S(=O)([O-])C(F)(F)C(F)(F)C(F)(F)C(F)(F)C(F)(F)C(F)(F)C(F)(F)C(F)(F)F
TOX17708	1	O=C([O-])C(F)(F)C(F)(F)C(F)(F)C(F)(F)C(F)(F)C(F)(F)C(F)(F)F
TOX17709	0	O=S(=O)([O-])C(F)(F)C(F)(F)C(F)(F)C(F)(F)C(F)(F)C(F)(F)F
TOX1771	1	CCC(C)(C)c1ccc(O)cc1
TOX17712	1	CC(c1ccc(O)cc1)(c1ccc(O)cc1)c1ccc(O)cc1
TOX17715	1	COC(OC)(C(=O)c1ccccc1)c1ccccc1
TOX17717	1	Oc1ccc(C(c2ccc(O)cc2)(C(F)(F)F)C(F)(F)F)cc1
TOX1772	1	CC1(N)CCC(C(C)(C)N)CC1
TOX17728	1	O=C(c1ccccc1)c1ccc(O)c(O)c1O
TOX1774	0	c1cc2c3c(cccc3c1)CC2
TOX17741	1	Cc1ccc(C(=O)c2ccccc2)cc1
TOX17745	1	CC(C)(C)c1ccc(OC(=O)c2ccccc2O)cc1
TOX1775	0	Cc1c[nH]c2ccccc12
TOX17750	0	CC/C=C\CCOC(=O)c1ccccc1O
TOX17752	1	O=C(Oc1ccccc1)c1cccc(C(=O)Oc2ccccc2)c1
TOX17754	1	C=CCOc1nc(OCC=C)nc(OCC=C)n1
TOX17756	0	CC(CO)c1ccccc1
TOX17757	0	C=CCCCCCCCCC=O
TOX1777	1	Cc1cc2nc3c(=O)[nH]c(=O)nc-3n(C[C@H](O)[C@H](O)[C@H](O)CO)c2cc1C
TOX1778	0	O=C(Oc1ccccc1)c1ccccc1C(=O)Oc1ccccc1
TOX1780	0	CCOC(=O)c1ccccc1C(=O)OCC
TOX17806	0	Nc1nc(N)nc(Cl)n1
TOX1781	1	CCCCOC(=O)c1ccccc1C(=O)OCCCC
TOX1789	0	NC(=O)c1ccccc1N
TOX179	0	CC(O)CNCC(C)O
TOX1790	0	O=[N+]([O-])c1ccccc1O
TOX1792	0	O=Cc1ccccc1O
TOX1793	1	Oc1cccc2ccccc12
TOX1795	1	O=c1c2ccccc2oc2ccccc12
TOX1798	0	c1ccc2ncccc2c1
TOX1799	0	CCN(CC)C1CCCCC1
TOX18	1	CC(=O)Nc1ccc2c(c1)Cc1ccccc1-2
TOX1800	0	CCN(CC)c1ccccc1
TOX1801	0	CCN(CCO)c1cccc(C)c1
TOX1802	0	C1CCC(C2CCCCC2)CC1
TOX1803	1	CC(=O)CC(=O)c1ccccc1
TOX1804	0	CCOC(=O)c1ccc(N)cc1
TOX1805	1	O=C(/C=C/C=C/c1ccc2c(c1)OCO2)N1CCCCC1
TOX1807	0	Cc1ccccc1C
TOX1808	0	Cc1ccccc1O
TOX181	0	O=[Bi]Cl
TOX1810	0	Nc1ccccc1Cl
TOX1815	1	Nc1ccc(Cl)c(Cl)c1
TOX1816	0	C=CCOC(=O)C(=C)C
TOX1817	0	OCC(Br)CBr
TOX1818	0	CCC(C)C=O
TOX182	1	CC(C)(c1ccc(O)cc1)c1ccc(O)cc1
TOX1820	0	CCC(=O)CC
TOX1821	0	CCC(C)=NO
TOX1822	0	CC(C)N(CCO)C(C)C
TOX1823	1	Nc1ccc([N+](=O)[O-])cc1[N+](=O)[O-]
TOX1824	1	Oc1ccc(Cl)cc1Cc1cc(Cl)ccc1O
TOX1828	0	CC(=O)c1ccccc1
TOX1831	0	Cc1cccc([N+](=O)[O-])c1
TOX18317	1	Oc1nc(Cl)c(Cl)cc1Cl
TOX1832	1	Cc1ccc(N(C)C)cc1
TOX18321	1	O=C(O)c1cccc(Oc2ccccc2)c1
TOX1834	1	O=[N+]([O-])c1ccc(O)cc1
TOX1835	1	CN(C)c1ccc(C=O)cc1
TOX1837	0	CCN(CC)CCO
TOX1839	0	NCc1ccccc1
TOX184	1	Nc1ccc(/N=N/c2ccc(-c3ccc(/N=N/c4c(S(=O)(=O)[O-])cc5cc(S(=O)(=O)[O-])c(/N=N/c6ccccc6)c(O)c5c4N)cc3)cc2)c(N)c1
TOX1841	0	CNc1ccccc1
TOX1842	0	ON=C1CCCCC1
TOX1843	0	N#Cc1ccccn1
TOX1847	0	c1ccc(Oc2ccccc2)cc1
TOX1848	0	CCNc1cccc(C)c1
TOX1851	0	CC(C)(O)CCc1ccccc1
TOX1853	0	OCCN1CCNCC1
TOX1854	0	CN(C)Cc1ccccc1
TOX1856	0	CCCCc1ccc(N)cc1
TOX1857	1	CCCCCCCCCc1ccc(O)cc1
TOX1863	0	CCOC(=O)CC(=O)OCC
TOX1864	0	Cc1ccc(O)c(C)c1
TOX1866	0	CCCCOC(=O)CCCCC(=O)OCCCC
TOX1867	1	Nc1ccc(Br)cc1
TOX1868	0	Cc1ccc(C)cc1
TOX18686	0	Cc1cccc(C(=O)O)c1O
TOX1869	1	Cc1ccc(O)cc1
TOX18694	1	O=C1Nc2ccccc2C1=O
TOX18696	0	CCOC(=O)c1ccccc1
TOX18700	0	COc1cc([N+](=O)[O-])ccc1N
TOX1871	1	Oc1ccc(Cl)cc1
TOX18725	0	CCCCCCCCCCCCCCBr
TOX1873	0	C=CC(=O)OCC(C)C
TOX18732	0	CCOC(=O)CCC(=O)OCC
TOX1874	0	CCCBr
TOX18756	0	O=Cc1ccc(F)cc1
TOX18762	0	Cc1ncc(C[n+]2csc(CCO)c2C)c(N)n1
TOX1877	0	OCCCl
TOX1879	0	CCC#N
TOX18795	0	C[SiH](O[Si](C)(C)C)O[Si](C)(C)C
TOX18798	0	CCOc1ccccc1OCC
TOX18800	0	CCCCOC(=O)CCC(C)=O
TOX18801	1	c1ccc(CNc2ncnc3c2ncn3C2CCCCO2)cc1
TOX18808	1	C=C[Si]1(C)O[Si](C)(C=C)O[Si](C)(C=C)O[Si](C)(C=C)O1
TOX18810	0	C=C[Si](C)(C)O[Si](C)(C)C=C
TOX18813	1	NNC(=O)c1cccc(C(=O)NN)c1
TOX18814	0	NC(=O)c1ccc(N)cc1
TOX18818	0	COC(C)(C)CCCC(C)CC=O
TOX18822	1	CC(C)(COC(=O)c1ccccc1)COC(=O)c1ccccc1
TOX18824	0	OC1OCCOC1O
TOX1883	0	C#CCO
TOX18830	0	CCCC(=O)OC(C)(C)Cc1ccccc1
TOX18831	0	COCCOC(=O)CC#N
TOX1885	0	CC(O)CC(C)(C)O
TOX18852	0	O=S(=O)(O)c1ccc2[nH]c(-c3ccccc3)nc2c1
TOX18855	1	Fc1cccc(Cl)c1CCl
TOX18857	1	CSc1ccc(C(=O)C(C)(C)N2CCOCC2)cc1
TOX1886	0	CC(C)(C)CC(C)(C)N
TOX18875	1	COc1ccc(C(=O)c2ccc(OC)cc2O)c(O)c1
TOX1888	0	CCCC(C)=O
TOX18881	1	O=S(=O)([O-])c1ccc(N=Nc2c(O)ccc3ccccc23)cc1
TOX1889	0	CC(=O)CC(C)C
TOX1890	0	CC(C)OC(C)C
TOX1892	0	Cc1ccncc1
TOX18922	1	CC(C)(c1cc(Br)c(OCCO)c(Br)c1)c1cc(Br)c(OCCO)c(Br)c1
TOX18924	0	CCCCCCOc1ccccc1C(=O)O
TOX18926	0	O=C(OCc1ccccc1)C(=O)OCc1ccccc1
TOX18939	1	NS(=O)(=O)C(F)(F)C(F)(F)C(F)(F)C(F)(F)C(F)(F)C(F)(F)C(F)(F)C(F)(F)F
TOX1894	0	OC1CCCCC1
TOX1897	0	Cc1cccnc1
TOX1899	0	Cc1ccccn1
TOX190	0	O=C1/C(=C2\Nc3ccc(S(=O)(=O)[O-])cc3C2=O)Nc2ccc(S(=O)(=O)[O-])cc21
TOX1901	0	CCCOC(C)=O
TOX1902	0	BrCCCBr
TOX1904	0	CCCCN
TOX1914	0	CC(=O)CCC(C)C
TOX1915	0	CCOC(=O)CCCCCCCCC(=O)OCC
TOX1916	1	CCCCCC(C)=O
TOX1917	0	CCCCCC
TOX1921	0	OCC#CCO
TOX1922	1	CCNCCO
TOX1923	0	C1CCCCC1
TOX1925	0	C1OCOCO1
TOX1928	0	CCOCCOC(C)=O
TOX1929	0	CCCCCCBr
TOX193	1	O=[N+]([O-])c1cc(N(CCO)CCO)ccc1NCCO
TOX1930	1	CCCCCCN
TOX1931	0	CCCCCCO
TOX1932	0	OCCNCCO
TOX1936	0	N#CCCCCC#N
TOX1937	0	CCCCCCCO
TOX1938	0	CCCCCCCCBr
TOX194	0	OB(O)O
TOX1940	0	CCCCCCCCO
TOX1941	0	CCOCCOCCO
TOX1943	0	CCCCCCCCCC(C)=O
TOX1946	1	CCCCCCCCCCO
TOX1947	0	CCCCCCCCCCCCCO
TOX1948	0	CNC(=O)Oc1ccccc1OC(C)C
TOX1949	0	C#CC(C)(C)O
TOX1952	1	O=P(Oc1ccccc1)(Oc1ccccc1)Oc1ccccc1
TOX1953	1	CCOP(=S)(OCC)Oc1ccc(S(C)=O)cc1
TOX1956	0	CCCCCCCCOC(=O)c1ccccc1C(=O)OCCCCCCCC
TOX1957	1	O=C(Oc1ccccc1)c1ccccc1O
TOX1958	0	CCOC(=O)c1ccccc1O
TOX1959	1	Oc1c(Br)cc(Br)cc1Br
TOX1961	1	O=C(c1ccccc1)c1ccccc1
TOX1962	0	OCCN(CCO)c1ccccc1
TOX1965	0	Clc1ccc(Cl)c(Cl)c1
TOX19657	1	Nc1nc(F)nc2c1ncn2[C@@H]1O[C@H](CO)[C@@H](O)[C@@H]1O
TOX1968	0	CCOc1cc(C=O)ccc1O
TOX1969	0	COc1cc(C=O)ccc1O
TOX197	1	CC(C)C[C@H]1C(=O)N2CCC[C@H]2[C@]2(O)O[C@](NC(=O)[C@@H]3C=C4c5cccc6[nH]c(Br)c(c56)C[C@H]4N(C)C3)(C(C)C)C(=O)N12
TOX1971	0	O=[N+]([O-])c1cccc(Cl)c1
TOX19719	0	O=[N+]([O-])[O-].O=[N+]([O-])[O-].[Ca+2]
TOX1974	0	CC(C)c1ccc(C=O)cc1
TOX1975	1	c1ccc(Nc2ccccc2)cc1
TOX1976	0	OCCOc1ccccc1
TOX1977	0	CCc1ccc(O)cc1
TOX1979	0	CC(=O)CC(C)=O
TOX198	0	ClC(Cl)Br
TOX1980	0	CCCCCC(=O)OCC
TOX1982	0	CCCCOC(C)=O
TOX1984	0	CCCCCCCCCCCCN
TOX1986	1	CCCCOP(=O)(OCCCC)OCCCC
TOX199	0	CCBr
TOX1993	0	c1ccc2c(c1)oc1ccccc12
TOX1995	1	CCN(CC)C(=O)c1cccc(C)c1
TOX1996	0	CCC(=O)[O-]
TOX1997	0	NCCN1CCNCC1
TOX1998	1	CCCCOC(=O)CCC(=O)OCCCC
TOX20	0	CC(=O)Nc1ccc(CC(=O)O)cc1
TOX200	1	OCCBr
TOX20001	0	COC(=O)c1ccccc1C(=O)O
TOX20002	0	CCCCOC(=O)c1ccccc1C(=O)O
TOX2001	0	CCOC(C)=O
TOX2004	0	ClCCCCl
TOX2006	0	CCCCCCOC(C)=O
TOX2007	0	CCCCOCCCC
TOX2008	0	CCCCCCCCCO
TOX2009	0	CCCCCCNCCCCCC
TOX2010	0	CCCCCCCC/C=C\CCCCCCCCO
TOX20110	0	CCOC(=O)CC
TOX20111	0	CCCC(=O)OCC
TOX20112	0	CCCCCCC(=O)OCC
TOX20114	0	C=CC(=O)NC(C)(C)C
TOX20115	1	Sc1nnc(S)s1
TOX20127	1	Nc1cccc(N)n1
TOX20129	0	Nc1nc(=O)n([C@@H]2CS[C@H](CO)O2)cc1F
TOX20130	1	COC(=O)[C@H]1[C@@H](O)CC[C@H]2CN3CCc4c([nH]c5ccccc45)[C@@H]3C[C@@H]21
TOX20134	0	CC[C@]12CCCN3CCc4c(n(c5ccccc45)[C@@](O)(C(=O)OC)C1)[C@@H]32
TOX2014	0	COc1ccc(OC)cc1
TOX20151	0	O=C(NCNC(=O)NC1C(=O)NC(=O)N1CO)NC1C(=O)NC(=O)N1CO
TOX20152	0	OC[C@H]1O[C@@H](Oc2ccc(O)cc2)[C@H](O)[C@@H](O)[C@@H]1O
TOX20154	0	C=C(C)C(=O)NCCCN(C)C
TOX2016	0	C1CN2CCN1CC2
TOX2018	0	CCOP(=S)(OCC)SCCSCC
TOX202	1	CCC[C@@H]1O[C@@H]2C[C@H]3[C@@H]4CCC5=CC(=O)C=C[C@]5(C)[C@H]4[C@@H](O)C[C@]3(C)[C@]2(C(=O)CO)O1
TOX2020	1	CCC(C)n1c(=O)[nH]c(C)c(Br)c1=O
TOX20208	1	CO[C@H]1C=CO[C@@]2(C)Oc3c(C)c(O)c4c(O)c(cc([O-])c4c3C2=O)NC(=O)C(C)=CC=C[C@H](C)[C@H](O)[C@@H](C)[C@@H](O)[C@@H](C)[C@H](OC(C)=O)[C@@H]1C
TOX20222	0	COc1cc(OC)nc(NC(=O)[N-]S(=O)(=O)c2ncccc2OCC(F)(F)F)n1
TOX20234	0	Nc1nc(N)nc(-c2cc(Cl)ccc2Cl)n1
TOX20236	0	O=c1cc(CO)occ1O
TOX20245	0	OC[C@H]1O[C@H](O[C@]2(CCl)O[C@H](CCl)[C@@H](O)[C@@H]2O)[C@H](O)[C@@H](O)[C@H]1Cl
TOX20246	0	CC1=C(CC(=O)O)c2cc(F)ccc2/C1=C\c1ccc(S(C)(=O)=O)cc1
TOX20266	0	CC1(C)[C@@H]2CC[C@@]1(C)[C@H](OC(=O)CSC#N)C2
TOX2027	0	Nc1ccc(F)cc1
TOX20271	0	Cc1ccc2ccccc2n1
TOX20274	1	CCOP(=S)(OCC)Oc1ccc(Cl)cc1Cl
TOX20283	1	CC(O)(c1ccc(Cl)cc1)c1ccc(Cl)cc1
TOX20284	1	O=C(O)Cc1c(Cl)ccc(Cl)c1Cl
TOX20285	0	CC(=O)c1ccccc1O
TOX20287	1	CN(C)C(=O)Nc1ccc(Oc2ccc(Cl)cc2)cc1
TOX20289	0	O=C(O)c1cccc(Cl)n1
TOX20295	0	CCCOC(=O)NCCCN(C)C
TOX20296	1	O=C(O)c1c(Cl)ccc(Cl)c1Cl
TOX20316	0	Cl[Ni]Cl
TOX20324	0	CNC(=O)Oc1cccc(C(C)C)c1
TOX20342	0	CCC1COC(=O)O1
TOX20343	0	O=C(CBr)OCc1ccccc1
TOX2035	0	CC1(C)[C@H]2CC[C@]1(C)[C@H](O)C2
TOX20360	0	CCOC(=O)C1=NOC(c2ccccc2)(c2ccccc2)C1
TOX20372	1	Fc1ccc(C2(Cn3cncn3)OC2c2ccccc2Cl)cc1
TOX20395	0	CCCCCC(O)/C=C/C=O
TOX2043	0	O=C(O)c1cccc(C(=O)O)n1
TOX20436	0	Nc1ncnc2c1ncn2[C@@H]1O[C@@H]2COP(=O)(O)O[C@H]2[C@H]1O
TOX20438	1	CC(C)(CO)[C@@H](O)C(=O)NCCC(=O)[O-].CC(C)(CO)[C@@H](O)C(=O)NCCC(=O)[O-]
TOX20459	0	CCCC(=O)Nc1ncnc2c1ncn2[C@@H]1O[C@@H]2COP(=O)(O)O[C@H]2[C@H]1OC(=O)CCC
TOX20464	1	CC(=O)O[C@@]12CO[C@@H]1C[C@H](O)[C@@]1(C)C(=O)[C@H](O)C3=C(C)[C@@H](OC(=O)[C@H](O)[C@@H](NC(=O)OC(C)(C)C)c4ccccc4)C[C@@](O)([C@@H](OC(=O)c4ccccc4)[C@@H]12)C3(C)C
TOX2047	0	CC(C)C1=CC2=CC[C@H]3[C@](C)(C(=O)O)CCC[C@]3(C)[C@H]2CC1
TOX20476	0	CC(C)(C)c1ccc(CCOc2ncnc3ccccc23)cc1
TOX2048	1	O=c1cc(-c2ccccc2)oc2ccccc12
TOX20484	1	C=C[C@@]1(C)CC(=O)[C@@]2(O)[C@](C)(O1)[C@@H](OC(C)=O)[C@@H](O)[C@H]1C(C)(C)CC[C@H](O)[C@@]12C
TOX2049	0	Cc1cc(C)c(O)c(C)c1
TOX205	1	CCCCOC(=O)c1ccccc1C(=O)OCc1ccccc1
TOX2050	0	Cc1ccccc1C#N
TOX20502	1	Cc1ccc(NC(=O)c2ccc(CN3CCN(C)CC3)cc2)cc1Nc1nccc(-c2cccnc2)n1
TOX2051	0	Cc1ccccc1C=O
TOX20526	1	C=C(C)[C@H]1CN[C@H](C(=O)O)[C@H]1CC(=O)O
TOX20540	0	COC(=O)[C@@H](N)CCCN/C(N)=N/[N+](=O)[O-]
TOX2055	0	CC(=O)OC(C)(C)C
TOX20554	1	O=C(NCCN1CCOCC1)c1ccc(Cl)cc1
TOX2056	0	Clc1cccc(Cl)c1
TOX2058	0	CCCCSCCCC
TOX20583	0	CCCN1C[C@H](CSC)C[C@@H]2c3cccc4[nH]cc(c34)C[C@H]21
TOX206	0	CCCCCl
TOX2060	1	O=Cc1ccccc1[N+](=O)[O-]
TOX20608	0	C[N+]1(C)[C@H]2C[C@H](OC(=O)[C@H](CO)c3ccccc3)C[C@@H]1[C@H]1O[C@@H]21
TOX2061	1	O=Cc1ccc([N+](=O)[O-])cc1
TOX20614	0	CC(=O)C(=O)[O-]
TOX20617	0	COc1cc(S(C)=O)ccc1-c1nc2ncccc2[nH]1
TOX2062	0	CC(=O)C(C)C
TOX20635	0	c1ccc(-c2ccccn2)nc1
TOX20643	0	Cc1cccc(C)c1NC1=NCCCS1
TOX20651	0	CO[C@H]1O[C@@H]2O[C@]3(C)CC[C@H]4[C@H](C)CC[C@@H]([C@H]1C)C42OO3
TOX20653	0	O=C(O)CCNC(=O)c1ccc(/N=N/c2ccc(O)c(C(=O)O)c2)cc1
TOX20656	1	CC(C)C(Br)C(=O)NC(N)=O
TOX20657	0	CN(Cc1ccc(C(C)(C)C)cc1)Cc1cccc2ccccc12
TOX20661	0	CC(C)(Oc1ccc(Cl)cc1)C(=O)O
TOX20664	0	CC=CC(=O)N(CC)c1ccccc1C
TOX20666	0	Cc1c(O)c(=O)ccn1C
TOX20674	1	CC1(C)O[C@@H]2C[C@H]3[C@@H]4C[C@H](F)C5=CC(=O)C=C[C@]5(C)[C@@]4(F)[C@@H](O)C[C@]3(C)[C@]2(C(=O)CO)O1
TOX20676	1	Cc1cnc(C(=O)NCCc2ccc(S(=O)(=O)NC(=O)NC3CCCCC3)cc2)cn1
TOX20679	1	CC(C)Oc1ccc2c(=O)c(-c3ccccc3)coc2c1
TOX20682	1	COC(=O)Nc1nc2cc(C(=O)c3ccccc3)ccc2[nH]1
TOX20683	1	CC(=O)O[C@]1(C(C)=O)CC[C@H]2[C@@H]3C=C(C)C4=CC(=O)CC[C@]4(C)[C@H]3CC[C@@]21C
TOX20684	1	CC[C@H](C)C(=O)O[C@H]1CCC=C2C=C[C@H](C)[C@H](CC[C@@H]3C[C@@H](O)CC(=O)O3)[C@H]21
TOX20685	0	Nc1cc(N2CCCCC2)nc(N)[n+]1[O-]
TOX20686	0	COc1ccc2cc([C@H](C)C(=O)O)ccc2c1
TOX20687	0	CC(C)[C@H]1CC[C@H](C(=O)N[C@H](Cc2ccccc2)C(=O)O)CC1
TOX20688	0	C[C@@H]1OC(=O)C[C@H](O)C[C@H](O)C[C@H](O)CC[C@@H](O)[C@H](O)C[C@]2(O)C[C@H](O)[C@@H](C(=O)O)C(C[C@@H](O[C@H]3O[C@@H](C)[C@H](O)[C@@H](N)[C@H]3O)C=CC=CC=CC=CCCC=CC=C[C@H](C)[C@@H](O)[C@H]1C)O2
TOX20691	0	Cc1cc(C(C)(C)C)c(O)c(C)c1CC1=NCCN1
TOX20693	0	CC(=O)O[C@H](CC(=O)[O-])C[N+](C)(C)C
TOX20694	1	CCCCOC(=O)c1ccccc1
TOX20697	0	Cc1c(Cl)cccc1Cl
TOX20698	0	CC(C)COP(=O)(OCC(C)C)OCC(C)C
TOX20699	1	O=C(O)C(c1ccc(Cl)cc1)c1ccc(Cl)cc1
TOX207	1	CCC(C)c1cc([N+](=O)[O-])cc([N+](=O)[O-])c1O
TOX2070	1	CCCCCCCCCCCC(C)=O
TOX20700	0	CO[Si](OC)(OC)c1ccccc1
TOX20701	0	CCOC(=O)CC(O)(CC(=O)OCC)C(=O)OCC
TOX20702	0	Cc1ccc(Cl)cc1Cl
TOX20703	0	CC(C)(C)c1ccc(C(=O)O)cc1
TOX20705	1	O=C(O)c1cc(-c2ccccc2)nc2ccccc12
TOX20707	1	CCCCCc1ccc(N)cc1
TOX20710	0	C[Si](C)(C)O[Si](C)(C)O[Si](C)(C)C
TOX20711	0	CCOC(=O)c1ccccc1C
TOX20712	1	CC[Sn](Br)(CC)CC
TOX20714	0	Cc1cc(C)c(N)c(Cl)c1
TOX20716	0	CCC(C)(C)C1CCC(O)CC1
TOX20718	1	COc1cc(Cl)c(OC)cc1N
TOX20719	0	CC(=O)CC(=O)Nc1ccc(C)cc1C
TOX20720	1	Nc1cc(Cl)c(O)c(Cl)c1
TOX20721	0	O=C1CCC(C2CCCCC2)CC1
TOX20722	0	OC1CCC(C2CCCCC2)CC1
TOX20724	0	CN1[C@H]2CC[C@@H]1C[C@H](OC(=O)C(CO)c1ccccc1)C2.CN1[C@H]2CC[C@@H]1C[C@H](OC(=O)C(CO)c1ccccc1)C2
TOX20726	0	Cc1c(C(=O)NCCO)[n+]([O-])c2ccccc2[n+]1[O-]
TOX20727	1	OC(Cn1cncn1)(c1ccc(F)cc1)c1ccccc1F
TOX20728	1	CCCCOP(=O)(O)OCCCC
TOX20731	0	CC(C)OC(=O)c1ccccc1C(=O)OC(C)C
TOX20735	0	C1CCC2(CCCCO2)OC1
TOX20736	1	CO[C@H]1[C@H]([C@@]2(C)O[C@@H]2CC=C(C)C)[C@]2(CC[C@H]1OC(=O)/C=C/C=C/C=C/C=C/C(=O)O)CO2
TOX20739	0	C[C@H]1O[C@H](O[C@@H]2[C@@H](O)[C@@H](O)[C@H](O)[C@H](O)[C@H]2O)[C@@H](N)C[C@@H]1NC(=N)C(=O)O
TOX20742	1	C[C@]12C[C@H](O)[C@@]3(F)[C@@H](CCC4=CC(=O)C=C[C@@]43C)[C@@H]1C[C@@H](O)[C@]2(O)C(=O)CO
TOX20747	1	CC(=O)[C@@]1(O)CC[C@H]2[C@@H]3CCC4=CC(=O)CC[C@]4(C)[C@H]3CC[C@@]21C
TOX20750	1	C[C@H]1C[C@H]2[C@@H]3CCC4=CC(=O)C=C[C@]4(C)[C@@]3(Cl)[C@@H](O)C[C@]2(C)[C@@]1(O)C(=O)CO
TOX20751	1	CC(C)C[C@H](NC(=O)OCC1c2ccccc2-c2ccccc21)C(=O)O
TOX20765	1	COC(=O)/C=C\C(=O)OC
TOX20770	1	CCC(=C(CC)c1ccc(O)cc1)c1ccc(O)cc1
TOX20776	0	O=c1c(O)c(-c2ccc(O)cc2O)oc2cc(O)cc(O)c12
TOX20783	1	C=CC(C)(O)CC/C=C(\C)CCC=C(C)C
TOX20794	1	[O-]c1ccccc1-c1ccccc1
TOX20795	0	Cc1ccc(S(=O)(=O)[N-]Cl)cc1
TOX20800	0	CC(O)(P(=O)(O)O)P(=O)(O)O
TOX20802	0	CC(C)CCCCCCc1ccc(OCCOCCO)cc1
TOX2082	1	CC(=O)Nc1ccccc1O
TOX2084	0	CCOc1ccc(N)c([N+](=O)[O-])c1
TOX2086	0	NC(=O)c1ccc([N+](=O)[O-])cc1
TOX2089	0	CC(=O)Nc1cccc(O)c1
TOX209	1	CCCCOC(=O)c1ccc(O)cc1
TOX2090	0	OCCN1CCOCC1
TOX2093	0	Cc1ccc(C)o1
TOX2096	0	CCCSSCCC
TOX20965	1	C[C@@]12C=CC[C@H]1[C@@H]1CC[C@H]3CC(=O)CC[C@]3(C)[C@H]1CC2
TOX20980	1	CC(C)C[C@H](NC(=O)[C@H](Cc1ccccc1)NC(=O)c1cnccn1)B(O)O
TOX21	0	CC(=O)N[C@@H](CS)C(=O)O
TOX210	0	CCCCN(CCCCO)N=O
TOX2100	1	CCCc1ccc(O)cc1
TOX21032	0	Nc1nc2c(ncn2COC(CO)CO)c(=O)[nH]1
TOX21045	0	CN[C@H]1C[C@@H](N)[C@H](O)[C@@H](O[C@@H]2O[C@H](CO)[C@H](O)[C@@H]3OC4(O[C@H]23)O[C@H](C(N)CO)[C@H](O)[C@H](O)[C@H]4O)[C@@H]1O
TOX21046	1	CC#CCC(C)[C@H](O)/C=C/C1[C@H]2C/C(=C/CCCC(=O)O)C[C@H]2C[C@H]1O
TOX21047	1	CC(C)Cn1cnc2c(N)nc3ccccc3c21
TOX2107	1	Cc1ncc[nH]1
TOX21075	0	CN(C)C(=O)Oc1cccc([N+](C)(C)C)c1
TOX21080	0	CCN(Cc1ccc(Cl)nc1)/C(=C/[N+](=O)[O-])NC
TOX21085	0	CC1COc2c(N3CCN(C)CC3)c(F)cc3c(=O)c(C(=O)O)cn1c23
TOX2109	0	CCCCCCC1CCC(=O)O1
TOX21091	0	C1CCc2nnnn2CC1
TOX21097	0	CCC(C)N(C)C(=O)c1cc2ccccc2c(-c2ccccc2Cl)n1
TOX211	1	CC(C)(C)c1cc(CO)cc(C(C)(C)C)c1O
TOX21104	0	O=C(O)C1CCCN1
TOX2111	1	CCC(=O)Nc1ccc(Cl)c(Cl)c1
TOX21117	0	CC[C@H]1OC(=O)[C@H](C)[C@@H](O[C@H]2C[C@@](C)(OC)[C@@H](O)[C@H](C)O2)[C@H](C)[C@@H](O[C@@H]2O[C@H](C)C[C@H](N(C)C)[C@H]2O)[C@](C)(O)C[C@@H](C)C(=NOCOCCOC)[C@H](C)[C@@H](O)[C@]1(C)O
TOX21125	0	[Na]I
TOX21126	1	N#C[Fe-2](C#N)(C#N)(C#N)(C#N)N=O
TOX2113	0	C=CC(Cl)CCl
TOX21132	1	Cc1cc(C)c(C=C2C(=O)Nc3ccccc32)[nH]1
TOX21137	0	CC[N+](CC)(CC)CC
TOX21148	0	O=C(O)/C=C/c1c[nH]cn1
TOX21153	0	C=CC(N)CCC(=O)O
TOX2117	0	NC12CC3CC(CC(C3)C1)C2
TOX21178	0	[N-]=[N+]=C1C=Cc2c(cccc2S(=O)(=O)[O-])C1=O
TOX21184	0	C=C1CC[C@H]2C[C@@H]1C2(C)C
TOX21185	0	N#CCc1ccc(Cl)cc1Cl
TOX21190	0	C=C(C)[C@@H]1CC=C(C=O)CC1
TOX21197	1	CCCCCC/C=C\CCCCCCCC(=O)O
TOX21199	0	CN(C)Cc1ccccc1O
TOX2120	1	CCOP(=S)(OCC)SCSc1ccc(Cl)cc1
TOX21200	1	CC(C/N=C/c1ccccc1O)/N=C/c1ccccc1O
TOX21206	1	c1csc(-c2ccc(-c3cccs3)s2)c1
TOX21208	0	CCCCCCCCCCO[C@@H]1O[C@H](CO)[C@@H](O)[C@H](O)[C@H]1O
TOX21209	0	C=C(C)C1CCC(C)(O)CC1
TOX2121	0	O=P(c1ccccc1)(c1ccccc1)c1ccccc1
TOX21210	0	CC1=CCC(C(C)C)=CC1
TOX21220	0	O=C1NC(=O)[C@@H]2CC=CC[C@H]12
TOX21224	0	OCCCCC(O)CO
TOX2123	1	C=CC(=O)OCCO
TOX21230	0	COc1nc(C)nc(N)n1
TOX21232	0	CC(C)c1cc(C(C)C)cc(C(C)C)c1
TOX21234	0	N#CCCCC(C#N)CCC#N
TOX21237	0	CC1=CC=C(C(C)C)CC1
TOX21238	0	NCC1CCCC(CN)C1
TOX2124	0	C#CC(O)CCCCC
TOX21242	1	CC(C)C(OC(=O)c1ccccc1)C(C)(C)COC(=O)c1ccccc1
TOX21246	0	OCCCO
TOX21247	1	O=C(CC(=O)c1ccccc1)c1ccccc1
TOX21250	1	CC(C)Nc1ccc(NC(C)C)c2c1C(=O)c1ccccc1C2=O
TOX21252	1	Nc1ccc(N)c2c1C(=O)c1ccccc1C2=O
TOX21253	0	CC1OC(=O)C(C)OC1=O
TOX21256	1	OCCCCCO
TOX21261	0	C=CCOCC(O)CCl
TOX21263	0	Cc1c(Cl)cccc1[N+](=O)[O-]
TOX21265	0	CCCCCCCCC(CO)CCCCCC
TOX21266	0	CCCCCCCCCCCC[N+](C)(C)CC(=O)[O-]
TOX21269	1	C[C@@H]1CC[C@H]2C(C)(C)[C@H]3C[C@]21CC[C@@]3(C)O
TOX2127	1	Oc1ccc(Oc2ccccc2)cc1
TOX21270	0	CC(=O)OCCC(C)CC(C)(C)C
TOX21273	0	O=C(O)C1=NN(c2ccc(S(=O)(=O)O)cc2)C(=O)C1
TOX21275	0	CCCCCCCCCCCC(=O)OCC(O)CO
TOX2128	0	C=C(C)C(=O)OCCO
TOX21280	0	CC1(C)CC(O)CC(C)(C)N1[O]
TOX21298	1	CCC1CCC(=O)O1
TOX21299	0	CCCCCCC1(C)CCC(=O)O1
TOX213	1	CCCCN(N=O)C(=N)N[N+](=O)[O-]
TOX2130	0	O=Cc1ccc(Cl)cc1Cl
TOX21302	0	C=C(C)C(=O)OCCOC1CC2CC1C1C=CCC21
TOX21306	1	O=C(c1ccc(O)cc1O)c1ccc(O)cc1O
TOX2131	1	c1ccc(SSc2ccccc2)cc1
TOX21317	1	O=C(O)c1cc(I)cc(I)c1I
TOX21321	0	CC(O)C(C)O
TOX21327	0	O=C(O)c1cccnc1C(=O)O
TOX21328	0	CCCCOCCOC(=O)COc1cc(Cl)c(Cl)cc1Cl
TOX21329	0	CCCCC(CC)COC(=O)COc1cc(Cl)c(Cl)cc1Cl
TOX2133	0	CCOC(=O)c1cccc(N)c1
TOX21336	1	[O-]c1cc(Cl)c(Cl)cc1Cl
TOX21346	0	CCOC(=O)COc1ccc(Cl)cc1Cl
TOX21347	0	CC(C)COC(=O)COc1ccc(Cl)cc1Cl
TOX21349	0	COC(=O)COc1ccc(Cl)cc1Cl
TOX21356	1	O=C([O-])CCCOc1ccc(Cl)cc1Cl
TOX21361	1	Nc1c(Cl)cc(Cl)cc1[N+](=O)[O-]
TOX21362	0	OCc1ccc(Cl)cc1Cl
TOX21363	0	O=C(O)Cc1ccc(Cl)cc1Cl
TOX21366	0	COc1ccc([N+](=O)[O-])cc1[N+](=O)[O-]
TOX21368	0	CCC1(C)NC(=O)NC1=O
TOX2137	0	CC/C=C\CCO
TOX21370	0	CC(O)C(CO)C(C)O
TOX21371	0	COCCOCCOCCOCCOCCO
TOX21372	1	O=C(O)c1cc(Cl)cc([N+](=O)[O-])c1Cl
TOX21373	0	CCCCCC=CCC1CC(=O)OC1=O
TOX21376	0	CCCCCCCCCCCCCN1CC(C)OC(C)C1
TOX21379	1	COc1cc(C(C)(C)C)c(O)c(C(C)(C)C)c1
TOX2138	0	CC/C=C/CCO
TOX21388	0	C=C(C)C(=O)OCCOC(=O)CC(C)=O
TOX21389	0	CC(=O)c1ccc2ccccc2c1
TOX21396	0	CCC(C)S
TOX21400	0	CCCCC(CC)(CO)CO
TOX21403	0	COc1ccc(OC)c(Cl)c1
TOX21404	0	Cc1cc(O)c(Cl)cc1C
TOX21405	0	NC(=O)c1ccc([N+](=O)[O-])cc1Cl
TOX21412	1	O=C(CCl)NCO
TOX21413	0	C=C(C)[C@@H]1CC=C(C)C(=O)C1
TOX21416	0	CCC(CC)CO
TOX21417	0	CCC(CO)(CO)[N+](=O)[O-]
TOX21418	0	CCC(CC)C(=O)O
TOX21420	0	O=C(O)c1ccco1
TOX21421	0	COc1cc(OC)c2ccc(=O)oc2c1
TOX21423	0	C=CN1CCCCCC1=O
TOX21424	0	CC(C)CCCC(C)(C)O
TOX21425	0	CCC/C=C/C=O
TOX21426	0	C1=COCCC1
TOX2143	1	C=CC(=O)OCC(C)O
TOX21431	0	CC(C)Oc1ccccc1O
TOX21436	0	CCC(C)(C)O
TOX21437	0	CC(CO)(CO)[N+](=O)[O-]
TOX21439	1	Cc1ccc2c(c1)C(=O)c1ccccc1C2=O
TOX21440	0	CCC(C)COC(=O)CC(C)C
TOX21441	0	Cc1ccccc1OCC(=O)O
TOX21442	1	O=S(=O)([O-])c1ccc2ccccc2c1
TOX21446	0	OC1CCCCC1c1ccccc1
TOX21451	0	C=CCS(=O)(=O)[O-]
TOX21452	1	CCCC(C)c1ccccc1O
TOX21460	0	O=C(O)c1cccc(C(F)(F)F)c1
TOX21464	0	N#CCCNCCC#N
TOX21467	1	O=C(O)c1snc(Cl)c1Cl
TOX21468	1	NC(=O)Nc1ccc(Cl)c(Cl)c1
TOX21472	0	C#CC(C)(O)CC(C)C
TOX21484	0	CC/C=C\CCOC(C)=O
TOX21487	0	CCC(C)(CCCC(C)C)OC(C)=O
TOX21490	0	C/C=C(\C)C(C)=O
TOX21491	1	OCC=Cc1ccccc1
TOX21492	0	CCCC(CC)c1ccccc1
TOX21494	1	O=C(Nc1ccc(F)cc1F)c1cccnc1Oc1cccc(C(F)(F)F)c1
TOX215	1	COc1ccc(O)c(C(C)(C)C)c1
TOX21506	1	Oc1ccc(Cl)cc1C1CCCC1
TOX21507	0	COc1ccc(Cl)cc1C
TOX21512	0	NC(=O)Nc1ccc(Cl)cc1
TOX21513	0	[O-][n+]1ccc(Cl)cc1
TOX21514	0	CCCCC/C=C\CCC=O
TOX21516	0	CCc1occc(=O)c1O
TOX21517	0	CC1=C(O)C(=O)C(C)O1
TOX21518	0	COc1ccc(CCO)cc1
TOX21519	0	CCCC(C)C(O)CC
TOX21521	0	NCCCN1CCOCC1
TOX21527	0	CC1(C)CC(=O)CC(C)(C)N1
TOX21528	0	N#Cc1ccncc1
TOX21529	0	CC(=O)Nc1ccc(S(N)(=O)=O)cc1
TOX21530	0	CCCCC(CC)CCC(CC(C)C)OS(=O)(=O)[O-]
TOX21540	0	O=C(O)c1cc(C(=O)O)cc([N+](=O)[O-])c1
TOX21541	1	CC(C)CCC(=O)CCC(C)C
TOX21544	1	CC(=O)c1cc2c(cc1C)C(C)(C)C(C)CC2(C)C
TOX21545	1	O=c1[nH]c2ccc(Cl)cc2o1
TOX21550	0	CC(C)=CCC[C@H](C)CCO
TOX21567	0	CCCCCC[C@@H](O)C/C=C\CCCCCCCC(=O)O
TOX21573	0	CCOC(=O)CP(=O)(OCC)OCC
TOX21575	0	O=C(O)COCC(=O)O
TOX21580	0	N#CCNCC#N
TOX2159	1	C=CCCCCCCC=C
TOX216	1	Cc1cc(C(C)(C)C)c(O)c(C(C)(C)C)c1
TOX2160	1	Oc1ccc(/N=N/c2ccccc2)cc1
TOX21600	1	COP(=S)(NC(C)C)Oc1ccc(C)cc1[N+](=O)[O-]
TOX21604	0	CCCCCOC(=O)CCC
TOX21607	0	c1cncc([C@@H]2CCCCN2)c1
TOX21610	0	O=C[C@@H](O)[C@H](O)[C@H](O)CO
TOX21611	0	CCCCCCCCCCCCCCCC(=O)OC[C@H](O)[C@H]1OC(=O)C(O)=C1O
TOX21613	0	Clc1ccc(C2(Cn3cncn3)OCCO2)c(Cl)c1
TOX21615	1	CSc1nc(N=[N+]=[N-])nc(NC(C)C)n1
TOX21619	1	COC(=O)C(C)N(C(=O)Cc1ccccc1)c1c(C)cccc1C
TOX21621	1	CCOC(=O)Cn1c(=O)sc2cccc(Cl)c21
TOX21623	1	O=C(Nc1ccccc1)c1ccccc1I
TOX21625	0	O=C(O)CONC(=O)c1ccccc1
TOX21626	0	Cc1ccc(C=O)cc1C
TOX21627	0	CC(C)NC(=O)c1ccccc1N
TOX21636	0	CC(=O)OC(C)c1ccccc1
TOX21638	0	OCCCc1ccccc1
TOX21639	0	Cc1ccc(S(=O)(=O)[O-])c(C)c1
TOX2164	0	C=CCc1ccccc1O
TOX21641	0	Cc1ccc(C)c(S(=O)(=O)O)c1
TOX21643	0	O=Cc1ccccc1S(=O)(=O)[O-]
TOX21646	0	CC1=NN(c2cc(S(=O)(=O)[O-])ccc2Cl)C(=O)C1/N=N/c1ccccc1
TOX21653	1	COC(=O)c1c(C)cc(O)c(C)c1O
TOX21654	0	CCCCC(CC)COC(=O)c1ccccc1
TOX21656	0	O=C(O)c1cc(Br)c(O)c(Br)c1
TOX21659	0	N#Cc1ccc(C(=O)O)cc1
TOX21661	1	N#Cc1ccccc1O
TOX21663	1	O=C(C=Cc1ccccc1)OCc1ccccc1
TOX21668	0	c1ccc(CCc2ccccc2)cc1
TOX21671	0	CC1=CC[C@@H]2C[C@H]1C2(C)C
TOX21672	0	CCOC(=S)SSC(=S)OCC
TOX21675	0	CC(=O)O[C@@H]1CC2CCC1(C)C2(C)C
TOX21680	1	ClC1=C(Cl)C2(Cl)C(CBr)CC1(Cl)C2(Cl)Cl
TOX21684	1	CCOP(=S)(OCC)Oc1cc(Cl)c(Br)cc1Cl
TOX21689	0	CCOC(=O)c1cnc2cc(OCC(C)C)c(OCC(C)C)cc2c1O
TOX21691	1	CC(C)N(Cc1ccccc1)C(=O)C(C)(C)C
TOX21692	0	COC(=O)CC(C(C)=O)C(=O)OC
TOX21698	0	CNC(=O)O/N=C(\C)C(C)S(C)(=O)=O
TOX21699	1	C#CC(C)N(C)C(=O)Nc1ccc(Cl)cc1
TOX2170	0	NC(=O)c1c(Cl)cccc1Cl
TOX21703	0	CCCCc1ccc2cccc(S(=O)(=O)[O-])c2c1
TOX21708	1	Cc1ccc(N=Nc2c(O)ccc(N=Nc3ccc(S(=O)(=O)[O-])cc3)c2O)c(C)c1
TOX21709	1	Cc1cc(S(=O)(=O)[O-])ccc1/N=N/c1c(O)ccc2ccccc12
TOX2171	0	CCCCCCCCCCN
TOX21715	0	COc1ccccc1/N=N/c1c(S(=O)(=O)[O-])cc2cc(S(=O)(=O)[O-])cc(NC(C)=O)c2c1O
TOX21719	0	CC1=NN(c2cc(Cl)c(S(=O)(=O)[O-])cc2Cl)C(=O)C1/N=N/c1ccc(S(=O)(=O)[O-])cc1
TOX2172	1	CNC(=O)Oc1ccc(N(C)C)c(C)c1
TOX21721	1	O=C1c2ccccc2C(=O)C1c1ccc2cc(S(=O)(=O)[O-])cc(S(=O)(=O)[O-])c2n1
TOX21726	1	O=C(Nc1ccc2c(O)c(N=Nc3ccc(N=Nc4ccc(S(=O)(=O)[O-])cc4)cc3)c(S(=O)(=O)[O-])cc2c1)c1ccccc1
TOX21728	0	CCOc1ccc(N=Nc2ccc(C=Cc3ccc(N=Nc4ccc(OCC)cc4)cc3S(=O)(=O)[O-])c(S(=O)(=O)[O-])c2)cc1
TOX2174	1	CCOP(=S)(Oc1ccc([N+](=O)[O-])cc1)c1ccccc1
TOX21743	1	Cc1ccccc1/N=N/c1ccc(/N=N/c2c(O)ccc3ccccc23)c(C)c1
TOX21756	0	CCNC(=O)C(C)OC(=O)Nc1ccccc1
TOX21774	1	Oc1ccc(Cl)c2c1CCC2
TOX21783	0	NC(=S)c1c(Cl)cccc1Cl
TOX2179	1	Clc1nc(Cl)c(Cl)c(Cl)c1Cl
TOX21790	0	CC(C)=CCCC(C)CC=O
TOX21793	0	Cc1nc(C)c(Cl)c(O)c1Cl
TOX21794	1	CCCCCC(C)OC(=O)COc1ccc(Cl)c2cccnc12
TOX21799	1	O=c1oc2ccccc2c(O)c1C1CCCc2ccccc21
TOX2180	0	CC(C)[C@@H]1CC[C@@H](C)C[C@H]1O
TOX21803	1	[Cu]I
TOX21809	0	O=S(=O)(O)NC1CCCCC1
TOX21813	0	CC1CCC(CO)CC1
TOX21815	0	CC1CC(O)CC(C)(C)C1
TOX21818	0	CCC(C)C1CCCCC1=O
TOX21827	1	O=C(Nc1ccc(Cl)c(Cl)c1)C1CC1
TOX21828	0	COP(=S)(OC)Oc1ccc(S(N)(=O)=O)cc1
TOX21844	0	O=C1O[C@@H]2[C@@H](O)[C@H](O)O[C@@H]2[C@H]1O
TOX21847	0	CCCCOC(=O)CCCCCCCCC(=O)OCCCC
TOX21850	1	COP(=S)(OC)Oc1ccc([N+](=O)[O-])cc1Cl
TOX21852	0	O=C(NC(O)C(Cl)(Cl)Cl)NC(O)C(Cl)(Cl)Cl
TOX2186	0	C=C(C)C(=O)OCCOCC
TOX21861	0	CCOP(O)OCC
TOX2187	0	Cc1ccc(C)c(O)c1C
TOX21873	1	CCNc1nc(NC(C)C(C)C)nc(SC)n1
TOX21877	0	CC(=O)OC(C)(C)Cc1ccccc1
TOX2188	0	CCCCCCCCCCCC#N
TOX21880	0	Cc1cc(OC(=O)N(C)C)nn1C(=O)N(C)C
TOX21886	0	CNC(=O)Oc1ccccc1C1OCCO1
TOX21889	1	O=[PH](Oc1ccccc1)Oc1ccccc1
TOX21891	0	c1ccc(Cc2ccccc2)cc1
TOX21892	0	O=S(=O)(c1ccccc1)c1ccccc1
TOX21909	0	Cl[Dy](Cl)Cl
TOX2191	0	C=C(C)C(=O)OCC1CCCO1
TOX21913	1	CCC1COC(Cn2cncn2)(c2ccc(Cl)cc2Cl)O1
TOX21914	0	NCCOCCN
TOX21916	0	CCCCOC(=O)C(=O)OCCCC
TOX21917	0	OCCN(CCO)CCN(CCO)CCO
TOX21918	0	OCCOCC#CCOCCO
TOX21920	0	CCCCC(CC)COCCO
TOX21925	0	CCSC(=O)N(CC)CC
TOX21927	0	CCCCc1c(C)nc(NCC)nc1O
TOX2193	0	C=C(C)C(=O)OCc1ccccc1
TOX2194	0	C=CC(=O)OCCCCCC
TOX21951	0	CCOC(=O)C(Br)c1ccccc1
TOX21954	0	CCCCCC(=O)CC
TOX21955	1	CCN(CCO)CCO
TOX21957	0	CCOC(OCC)OCC
TOX21959	0	CCOC(=O)C(F)(F)F
TOX21962	0	CCO[Si](CC)(OCC)OCC
TOX21964	0	CCOc1cc(OP(=S)(OC)OC)nc(CC)n1
TOX21966	0	COP(=S)(OC)Oc1ccc(S(=O)(=O)N(C)C)cc1
TOX21970	0	CC12CCC(C1)C(C)(C)C2O
TOX21973	0	O=S(=O)(Oc1ccc(Cl)cc1)c1ccccc1
TOX21977	1	CC(C)OC(=O)C(C)N(C(=O)c1ccccc1)c1ccc(F)c(Cl)c1
TOX21981	0	O=C(O)CF
TOX21983	1	CCOC(=O)COC(=O)c1cc(Oc2ccc(C(F)(F)F)cc2Cl)ccc1[N+](=O)[O-]
TOX21987	1	O=C1C(Cl)C(CCl)CN1c1cccc(C(F)(F)F)c1
TOX21995	1	c1coc(-c2nc3ccccc3[nH]2)c1
TOX21997	1	O=C1OCCN1/N=C/c1ccc([N+](=O)[O-])o1
TOX22	1	O=C(O)c1cc(Oc2ccc(C(F)(F)F)cc2Cl)ccc1[N+](=O)[O-]
TOX220	1	CC(C)(C)c1cc(O)ccc1O
TOX22005	0	CCCCCCCCCCCCCC(=O)OCC(O)CO
TOX22006	0	CCCCCCCC(=O)OCC(O)CO
TOX22007	0	CCCCCC[C@@H](O)C/C=C\CCCCCCCC(=O)OCC(O)CO
TOX22011	1	CCCCCCCCCCCC(=O)N(C)CC(=O)O
TOX22014	0	ON=CC=NO
TOX22038	0	CCCCCCCOC(=O)CCC
TOX22051	0	Cc1ccccc1NC(=N)NC(=N)N
TOX22052	1	C1=Cc2ccccc2C1
TOX22053	1	O=C(O)C(=O)Cc1c[nH]c2ccccc12
TOX22059	0	CCCC(=O)OCCC(C)C
TOX22060	0	CC1(C)[C@@H]2CC[C@@]1(C)[C@H](O)C2
TOX22061	0	CC(=O)O[C@@H]1C[C@H]2CC[C@]1(C)C2(C)C
TOX22062	0	CCC(=O)O[C@@H]1C[C@H]2CC[C@]1(C)C2(C)C
TOX22063	1	COP(N)(=S)Oc1ccccc1C(=O)OC(C)C
TOX22065	1	ClC1=C(Cl)[C@]2(Cl)[C@H]3[C@H]([C@H]4C=C[C@H]3C4)[C@@]1(Cl)C2(Cl)Cl
TOX22072	0	CNC(=O)Oc1ccccc1C(C)C
TOX22074	0	Cc1ccc(C(C)C)cc1O
TOX22077	1	CC(C)c1ccc(NC(=O)N(C)C)cc1
TOX22080	1	CCOP(=S)(OCC)Oc1cc(-c2ccccc2)on1
TOX22084	1	CN(C)C(=O)Nc1cccc(OC(=O)NC(C)(C)C)c1
TOX22089	0	CCCCCCCCCCCCSC#N
TOX22094	0	CC(C)=CCC[C@](C)(O)[C@@H]1CC=C(C)CC1
TOX22096	0	OC[C@H](O)[C@H](O)[C@@H](O)[C@H](O)CO
TOX22097	0	CC1OC1C1CCC2(C)OC2C1
TOX221	1	CC(C)(C)c1ccc(O)cc1
TOX22117	1	CCOC(=O)N(C)C(=O)CSP(=S)(OCC)OCC
TOX22121	1	CC#Cc1cc(C)nc(Nc2ccccc2)n1
TOX22137	1	Cc1oc(C)c(C(=O)Nc2ccccc2)c1C
TOX22143	0	COC(=O)Cc1cccc2ccccc12
TOX22146	0	COC(=O)c1cc(Cl)cc(Cl)c1
TOX22149	0	COC(=O)CC(=O)C(C)(C)C
TOX22151	0	COC(=O)/C=C/c1ccccc1
TOX22154	1	CN(C)c1ccc(/N=N/c2ccccc2C(=O)O)cc1
TOX22157	1	CON(C)C(=O)Nc1ccc(Br)cc1
TOX22167	0	O=C([O-])c1ccccc1C(=O)O
TOX2217	0	COc1cc(OC)c(OC)cc1C=O
TOX22170	0	C1CN(CCOCCN2CCOCC2)CCO1
TOX22171	0	CCCCCCCCCCCCN1CCOCC1
TOX2218	0	C=C(C)C(=O)OC(C)C
TOX22180	1	CNC(=O)Nc1ccc(Cl)c(Cl)c1
TOX22181	0	CC(=O)Nc1ccc(C)c(Cl)c1
TOX22187	1	CCCCNC(=S)NCCCC
TOX22188	0	CCCCNC(=O)NCCCC
TOX22189	0	CC(C)N(c1ccccc1)C(C)C
TOX22190	0	CCCCCCCCCC[N+](C)(C)[O-]
TOX22191	0	CNC(=S)NC
TOX22195	0	O=C(O)COc1ccc2ccccc2c1
TOX22196	0	CCCCOC(=O)C(C)O
TOX22198	0	CCCCNS(=O)(=O)c1ccc(C)cc1
TOX22199	0	O=C1CCC(=O)N1Cl
TOX222	1	CCCCNC(N)=O
TOX22203	0	CCCN(CCC)c1c([N+](=O)[O-])cc(S(C)(=O)=O)cc1[N+](=O)[O-]
TOX22208	0	CNC(=O)C(c1ccccc1)c1ccccc1
TOX22209	0	CCCCCCCCN(C)CCCCCCCC
TOX22210	0	CN1CCCC1
TOX22215	0	CCCCCCCCC(=O)Cl
TOX22218	0	CCCCCOC(=O)CCCC
TOX22219	0	CCCc1ccccc1
TOX22220	1	OC(c1ccc(F)cc1)(c1cncnc1)c1ccccc1Cl
TOX22232	0	CC(CC=O)CCCC(C)(C)O
TOX22234	0	CCCCCCCCO[C@@H]1O[C@H](CO)[C@@H](O)[C@H](O)[C@H]1O
TOX22242	0	CCc1ccccc1N
TOX22247	0	CC(C)(C)C1(CCc2ccc(Cl)cc2)CO1
TOX22254	0	CCCCCCCCCCCCCCCC(=O)NCCO
TOX22256	1	OC(c1ccc(Cl)cc1)(c1ccc(Cl)cc1)c1cccnc1
TOX22259	0	O=S(=O)(c1ccccc1)c1ccc(Cl)cc1
TOX22263	0	CSc1c(Cl)c(Cl)c(Cl)c(Cl)c1Cl
TOX22266	0	CCCCCSCCCCC
TOX22269	0	CCOP(=S)(OCC)SCSc1cc(Cl)ccc1Cl
TOX2227	0	CN(C)CCCCl
TOX22273	1	CC(C)c1ccc(O)c(C(C)C)c1
TOX22276	0	CCOc1ccccc1O
TOX22279	0	CC(C)C(=O)OCCOc1ccccc1
TOX22280	1	CCOC(=O)C(SP(=S)(OC)OC)c1ccccc1
TOX22281	1	O=C(O)C(=O)Cc1ccccc1
TOX22285	0	CCOP(=O)(N=C1SCCS1)OCC
TOX22299	0	CC(C)c1ccc(O)cc1
TOX223	0	CC1CC(=O)O1
TOX22315	1	CCOC(=S)[S-]
TOX22322	1	CCCCCC[C@@H](O)C/C=C\CCCCCCCC(=O)[O-]
TOX22324	1	CC(=O)CC(c1ccccc1)c1c([O-])c2ccccc2oc1=O
TOX22325	0	CCCc1ccc(OC)cc1
TOX22327	0	COCCCOCCCOC
TOX22335	0	CCCCOC(=O)[C@H](C)O
TOX22337	0	CCCOC(=O)CC
TOX22338	0	CC(COC(C)(C)C)OCCCO
TOX22343	0	CCCOCCC
TOX22349	1	CCCSP(=S)(OCC)Oc1ccc(Cl)cc1Cl
TOX22352	1	CCOC(=O)c1cn2nc(OP(=S)(OCC)OCC)cc2nc1C
TOX22356	0	c1ccc(CCCc2ccccn2)cc1
TOX22360	1	O=C(NCc1cccnc1)Nc1ccc([N+](=O)[O-])cc1
TOX22364	0	Cc1cnc2c(C(=O)O)c(Cl)ccc2c1
TOX22365	1	CCOc1ccc2c(c1)C(C)CC(C)(C)N2
TOX22369	1	CCN(CC)c1ccc2c(-c3ccccc3C(=O)O)c3ccc(N(CC)CC)cc3[o+]c2c1
TOX22379	0	CO[Si](C)(C)OC
TOX22382	0	CCCO[Si](OCCC)(OCCC)OCCC
TOX22394	0	O=S(=O)([O-])c1cccc2ccccc12
TOX224	0	O=C1CCCO1
TOX22400	0	CCCCCCCCCCCCCCCCOS(=O)(=O)[O-]
TOX22406	0	COS(=O)(=O)[O-]
TOX22422	0	OCC(O)c1ccccc1
TOX22423	0	CC(=O)OC[C@H]1O[C@H](O[C@]2(COC(C)=O)O[C@H](COC(C)=O)[C@@H](OC(C)=O)[C@@H]2OC(C)=O)[C@H](OC(C)=O)[C@@H](OC(C)=O)[C@@H]1OC(C)=O
TOX22424	1	Nc1ccc(S(=O)(=O)Nc2cnc3ccccc3n2)cc1
TOX22426	0	O=C(O)CC(C(=O)O)S(=O)(=O)O
TOX22436	1	COc1cc(O)c(C(=O)c2ccccc2)cc1S(=O)(=O)O
TOX22437	1	COC(=O)Nc1ccc(Cl)c(Cl)c1
TOX22440	0	O=C(NC(=O)c1c(F)cccc1F)Nc1cc(Cl)c(F)c(Cl)c1F
TOX22441	0	CNC(=O)Oc1c(C(C)(C)C)cc(C)cc1C(C)(C)C
TOX22448	0	CCCCNc1ccc(C(=O)OCCN(C)C)cc1
TOX22451	0	Clc1sc(Cl)c(Cl)c1Cl
TOX2246	0	NCCCN1CCN(CCCN)CC1
TOX22465	1	O=P([O-])([O-])OP(=O)([O-])[O-]
TOX22468	0	CNC(=O)ON=C(CSC)C(C)(C)C
TOX2247	1	C=CC(C)(O)CCC=C(C)CCC=C(C)C
TOX22490	0	CCO[Si](C)(OCC)OCC
TOX22491	0	CCCCC[Si](OCC)(OCC)OCC
TOX22494	0	CCC[Si](OC)(OC)OC
TOX22498	1	c1ccc([Bi](c2ccccc2)c2ccccc2)cc1
TOX22503	0	CCCCOC(CC)OC(C)COC(O)CC
TOX22507	0	NC(=O)Nc1ccccc1
TOX22508	0	O=c1[nH]c(=O)c2[nH]c(=O)[nH]c2[nH]1
TOX22509	1	CC(C)CC(=O)C1C(=O)c2ccccc2C1=O
TOX22514	0	OC[C@H](O)[C@@H](O)[C@H](O)CO
TOX22521	0	Cc1c(C(N)=O)cc([N+](=O)[O-])cc1[N+](=O)[O-]
TOX2253	1	CC(C)=CC1C(C(=O)OCc2coc(Cc3ccccc3)c2)C1(C)C
TOX2254	0	CCOP(=S)(OCC)SCSC(C)(C)C
TOX22559	1	COc1cc(-c2ccc(=O)[nH]n2)ccc1OC(F)F
TOX2256	0	CC(=O)c1ccc(Cl)c(Cl)c1Cl
TOX22574	0	CCN1CCCC1CNC(=O)c1cc(S(N)(=O)=O)ccc1OC
TOX22579	1	O=C1NCN(c2ccccc2)C12CCN(CCCOc1ccc(F)cc1)CC2
TOX22583	0	CCN1CCC[C@H]1CNC(=O)c1cc(S(N)(=O)=O)ccc1OC
TOX22592	1	O=C(c1ccc(F)cc1)C1CCN(CCn2c(=S)[nH]c3ccccc3c2=O)CC1
TOX22594	1	Cc1nc2sccn2c(=O)c1CCN1CCC(=C(c2ccc(F)cc2)c2ccc(F)cc2)CC1
TOX22602	0	COc1ccccc1N1CCN(CCCCNC(=O)c2ccc(-c3ccc(C(C)=O)cc3)cc2)CC1
TOX22612	0	CNc1cc(OC)c(C(=O)N[C@H]2CCN(Cc3ccccc3)[C@H]2C)cc1Cl
TOX22613	0	CCN1CCCC1CNC(=O)c1cc(S(=O)(=O)CC)c(N)cc1OC
TOX22614	0	COc1cc2c(cc1OC)C1CC(=O)C(CC(C)C)CN1CC2
TOX22618	0	Cc1cc(C)cc(C(=O)OC2C[C@@H]3CC[C@H](C2)N3C)c1
TOX22622	1	Cn1ccc2cc3c(cc21)CCN3C(=O)Nc1cccnc1
TOX22632	0	CN1[C@H]2CC[C@@H]1C[C@H](OC(=O)c1cc(Cl)cc(Cl)c1)C2
TOX22633	0	CN(C)CCCN1c2ccccc2CCc2ccc(Cl)cc21
TOX2267	0	CNC(=O)ON=C(C)SC
TOX2279	0	CC(C)c1cccc(C(C)C)c1N
TOX2284	0	CCC(C)N
TOX2292	0	CC1(C)C(C=C(Cl)Cl)C1C(=O)OCc1cccc(Oc2ccccc2)c1
TOX23	1	C=CC=O
TOX2301	1	CC(C)[C@H](C(=O)OC(C#N)c1cccc(Oc2ccccc2)c1)c1ccc(OC(F)F)cc1
TOX2305	0	C=Cc1ccc(C(C)(C)C)cc1
TOX2306	0	CCOP(=O)(OCC)SCCSCC
TOX2307	1	C=Cc1cccc(CCl)c1
TOX2308	1	O=c1c(-c2ccc(O)cc2)coc2cc(O)cc(O)c12
TOX231	1	O=C(O)C=Cc1ccc(O)c(O)c1
TOX2311	1	COc1ccc(-c2coc3cc(O)ccc3c2=O)cc1
TOX2312	1	CCCCCCCCc1ccc(O)cc1
TOX232	1	Cn1c(=O)c2c(ncn2C)n(C)c1=O
TOX2320	1	C(=C(c1ccccc1)c1ccccc1)c1ccccc1
TOX2326	1	C[C@@H]1O[C@@H](OC[C@H]2O[C@@H](Oc3c(-c4ccc(O)c(O)c4)oc4cc(O)cc(O)c4c3=O)[C@H](O)[C@@H](O)[C@@H]2O)[C@H](O)[C@H](O)[C@H]1O
TOX2329	1	C[C@]12CC[C@H]3[C@@H](CCC4=CC(=O)CC[C@@]43C)[C@@H]1CC[C@H]2O
TOX233	1	C=C1CC[C@H](O)C/C1=C/C=C1\CCC[C@@]2(C)[C@H]1CC[C@@H]2[C@H](C)/C=C/[C@H](C)C(C)C
TOX2331	1	CCC(C)c1ccccc1O
TOX2332	1	CCC(C)c1ccc(O)cc1
TOX2341	0	COc1nc(NC(C)C)nc(NC(C)C)n1
TOX2345	1	Clc1ccc(C(c2ccccc2Cl)C(Cl)(Cl)Cl)cc1
TOX235	0	[Ca+2].[Cl-].[Cl-]
TOX2353	1	Oc1ccc(-c2ccccc2)c(Cl)c1
TOX236	0	CC(O)C(=O)[O-].CC(O)C(=O)[O-]
TOX2361	0	C=CC1(C)OC(=O)N(c2cc(Cl)cc(Cl)c2)C1=O
TOX2364	1	C[C@]12CC[C@H]3[C@@H](CC[C@H]4CC(=O)CC[C@@]43C)[C@@H]1CC[C@@H]2O
TOX2366	1	C[C@]12CC[C@@H]3c4ccc(O)cc4CC[C@H]3[C@@H]1C[C@@H](O)[C@@H]2O
TOX2367	1	C[C@]12CC[C@@H]3c4ccc(O)cc4CC[C@H]3[C@@H]1CCC2=O
TOX2369	1	C[C@]12CC[C@@H]3c4ccc(O)cc4C[C@@H](CCCCCCCCCS(=O)CCCC(F)(F)C(F)(F)F)[C@H]3[C@@H]1CC[C@@H]2O
TOX2370	1	CC(=O)[C@H]1CC[C@H]2[C@@H]3CCC4=CC(=O)CC[C@]4(C)[C@H]3CC[C@]12C
TOX23709	0	CC1=C2C[C@H]3[C@@H](CC=C4C[C@@H](O)CC[C@@]43C)[C@@H]2CC[C@]12O[C@@H]1C[C@H](C)CN[C@H]1[C@H]2C
TOX2371	1	C[C@]12CC[C@H]3[C@@H](CCC4=CC(=O)CC[C@@]43C)[C@@H]1CC[C@@H]2O
TOX23714	0	Cn1nnc2c(C(N)=O)ncn2c1=O
TOX23761	1	O=C(Nc1ccc([N+](=O)[O-])cc1)Nc1ccc([N+](=O)[O-])cc1
TOX23763	0	CN1C(=O)C[C@@H](C(=O)N[C@@H](Cc2c[nH]cn2)C(=O)N2CCC[C@H]2C(N)=O)NC1=O
TOX2377	1	C[C@]12CC[C@@H]3c4ccc(O)cc4CC[C@H]3[C@@H]1CC[C@H]2O
TOX23782	0	O=C(Nc1cccc2c(=O)cc(-c3nnn[nH]3)oc12)c1ccc(OCCCCc2ccccc2)cc1
TOX238	0	CN(C)C(=O)COC(=O)Cc1ccc(OC(=O)c2ccc(NC(=N)N)cc2)cc1
TOX2381	1	CC[C@H](c1ccc(O)cc1)[C@@H](CC)c1ccc(O)cc1
TOX23814	0	CN1CCc2cc(Cl)c(O)cc2[C@H]2c3ccccc3CC[C@@H]21
TOX2382	1	C/C=C(C(=C/C)/c1ccc(O)cc1)\c1ccc(O)cc1
TOX23829	0	COc1ccc(N)c(OC)c1
TOX23873	0	NCC(O)c1ccc(O)cc1
TOX23892	0	O=C(O)c1ccc2[nH]cc(CCCCN3CC=C(c4ccccc4)CC3)c2c1
TOX23896	1	Oc1ccc(C2CNCCc3c2cc(O)c(O)c3Cl)cc1
TOX23902	1	CCCCN(CCCC)C(=O)N(CCCC)CCCC
TOX23908	0	CC(C=O)Cc1ccc2c(c1)OCO2
TOX2391	1	O=c1cc(-c2ccc(O)cc2)oc2cc(O)cc(O)c12
TOX23915	1	CCCCCC(=O)O[C@]1(C(C)=O)CC[C@H]2[C@@H]3CCC4=CC(=O)CC[C@]4(C)[C@H]3CC[C@@]21C
TOX23919	0	OC[C@H](O)[C@H](O)CO
TOX23938	0	O=C(O)c1ccccc1C(=O)OCc1ccccc1
TOX23941	0	O=CN1CCCCC1
TOX23950	0	O=S(=O)([O-])c1cc(O)c(O)c(S(=O)(=O)[O-])c1
TOX2396	1	O=c1cc(-c2ccccc2)oc2cc(O)cc(O)c12
TOX240	0	O=C1CCCCCN1
TOX24000	0	CSc1ccc2c(c1)C(N1CCN(C)CC1)Cc1ccccc1S2
TOX24029	0	Cn1cc(C2=C(c3cn(C4CCN(Cc5ccccn5)CC4)c4ccccc34)C(=O)NC2=O)c2ccccc21
TOX2403	1	COc1ccc(C(=O)c2ccccc2O)c(O)c1
TOX2404	1	O=C(c1ccccc1O)c1ccccc1O
TOX2405	1	COc1ccc(C(=O)c2ccccc2)c(O)c1
TOX2406	1	O=C(c1ccccc1)c1ccc(O)cc1O
TOX2408	1	O=S1(=O)OC(c2ccc(O)cc2)(c2ccc(O)cc2)c2ccccc21
TOX2409	1	O=S(=O)(c1ccc(O)cc1)c1ccc(O)cc1
TOX241	1	COc1cc(CNC(=O)CCCC/C=C/C(C)C)ccc1O
TOX2411	0	CC(C)(C)c1cc(Cc2cc(C(C)(C)C)c(O)c(C(C)(C)C)c2)cc(C(C)(C)C)c1O
TOX24112	1	COC(=O)Nc1nc2cc(S(=O)c3ccccc3)ccc2[nH]1
TOX24124	0	COc1ccc(C2CNC(=O)C2)cc1OC1CCCC1
TOX24130	0	Nc1ccc(S(=O)(=O)Nc2ncccn2)cc1
TOX24131	0	Nc1ccc(S(=O)(=O)Nc2ccnn2-c2ccccc2)cc1
TOX24132	0	CC1CN(c2cc3c(cc2F)c(=O)c(C(=O)O)cn3-c2ccc(F)cc2F)CCN1
TOX24137	0	CN1[C@H]2CC[C@@H]1CC(OC(=O)c1c[nH]c3ccccc13)C2
TOX2415	0	Cc1ccc2c(C)cccc2c1
TOX24161	1	Cl[Sb](Cl)Cl
TOX2417	1	CCCCOC(=O)c1ccc(N)cc1
TOX24196	0	Clc1ccc2c(c1)CCc1cccnc1C2=C1CCNCC1
TOX2420	1	NCCc1ccc(O)c(O)c1
TOX24200	0	O=C(O)CCSCCC(=O)O
TOX24201	1	OCCOCCN1CCN(C2=Nc3ccccc3Sc3ccccc32)CC1.OCCOCCN1CCN(C2=Nc3ccccc3Sc3ccccc32)CC1
TOX24202	0	CCCCCCCCOC(C)=O
TOX24203	1	CCc1ccc(CCOc2ccc(CC3SC(=O)NC3=O)cc2)nc1
TOX24205	1	COCCCOc1ccnc(CS(=O)c2nc3ccccc3[n-]2)c1C
TOX24206	1	Nc1c(CC(=O)[O-])cccc1C(=O)c1ccc(Br)cc1.Nc1c(CC(=O)[O-])cccc1C(=O)c1ccc(Br)cc1
TOX24207	1	O=C1OC2(c3ccccc31)c1cc(I)c(O)c(I)c1Oc1c2cc(I)c(O)c1I
TOX24208	0	Cc1nc[nH]c1CN1CCc2c(c3ccccc3n2C)C1=O
TOX2421	1	COc1ccc2[nH]cc(CCNC(C)=O)c2c1
TOX24210	0	CC(C)[C@H](N)C(=O)OCCOCn1cnc2c(=O)[nH]c(N)nc21
TOX24215	1	COc1ccnc(CS(=O)c2nc3cc(OC(F)F)ccc3[n-]2)c1OC
TOX24217	0	CCCCc1ncc(/C=C(\Cc2cccs2)C(=O)O)n1Cc1ccc(C(=O)O)cc1
TOX24218	1	Cc1ccsc1C(=CCCN1CCC[C@@H](C(=O)O)C1)c1sccc1C
TOX2422	1	Nc1ccc(Cc2ccc(N)cc2)cc1
TOX24221	0	CC(C)(C)NC(=O)[C@@H]1CN(Cc2cccnc2)CCN1C[C@@H](O)C[C@@H](Cc1ccccc1)C(=O)N[C@H]1c2ccccc2C[C@H]1O
TOX24223	1	O=C1[C@H](CC[C@H](O)c2ccc(F)cc2)[C@@H](c2ccc(O)cc2)N1c1ccc(F)cc1
TOX24226	0	Cc1onc(-c2ccccc2)c1-c1ccc(S(N)(=O)=O)cc1
TOX24227	0	CCCN[C@H]1CCc2nc(N)sc2C1
TOX24236	1	Cc1cc(CCC(=O)OCCOCCOCCOC(=O)CCc2cc(C)c(O)c(C(C)(C)C)c2)cc(C(C)(C)C)c1O
TOX24239	0	COc1ccc(C[C@@H](C)NC[C@H](O)c2ccc(O)c(NC=O)c2)cc1.COc1ccc(C[C@@H](C)NC[C@H](O)c2ccc(O)c(NC=O)c2)cc1
TOX24241	0	CCCCC(C)C(=O)O
TOX24247	1	OC[C@H](O)[C@@H](O)[C@H](O[C@@H]1O[C@H](CO)[C@H](O)[C@H](O)[C@H]1O)[C@H](O)CO
TOX2425	1	O=C(c1ccc(O)cc1)c1ccc(O)cc1
TOX24251	0	CCOc1ccc(O)cc1
TOX24252	0	CC(C)CCCC(=O)O
TOX24266	0	CNCC[C@@H](Oc1ccccc1C)c1ccccc1
TOX24267	1	CCOC(=O)[C@H](CCc1ccccc1)N[C@@H](C)C(=O)N1Cc2cc(OC)c(OC)cc2C[C@H]1C(=O)O
TOX24268	1	O=C(O)COCCN1CCN(C(c2ccccc2)c2ccc(Cl)cc2)CC1
TOX24272	0	CCOC(=O)[C@H](CCc1ccccc1)N[C@@H](C)C(=O)N1CC2(C[C@H]1C(=O)O)SCCS2
TOX24280	1	C=C[C@H]1CN2CCC1C[C@H]2[C@H](O)c1ccnc2ccc(OC)cc12
TOX24288	1	O=C1/C(=C2\Nc3ccc(S(=O)(=O)O)cc3C2=O)Nc2ccc(S(=O)(=O)O)cc21
TOX24289	0	CN(C)CCc1c[nH]c2ccc(CS(=O)(=O)N3CCCC3)cc12
TOX243	1	O=C1C2CC=CCC2C(=O)N1SC(Cl)(Cl)Cl
TOX24303	1	CC(C)c1c(C(=O)Nc2ccccc2)c(-c2ccccc2)c(-c2ccc(F)cc2)n1CC[C@@H](O)C[C@@H](O)CC(=O)[O-].CC(C)c1c(C(=O)Nc2ccccc2)c(-c2ccccc2)c(-c2ccc(F)cc2)n1CC[C@@H](O)C[C@@H](O)CC(=O)[O-]
TOX24307	0	CC1(C)[C@H]2CC[C@](C)(C2)[C@H]1O
TOX24309	1	c1cnc2c(c1)ccc1cccnc12
TOX24316	0	Cc1ccc(S(=O)(=O)O)cc1.O
TOX24317	1	O=S(=O)(O)c1ccc(O)c2ncccc12
TOX2432	1	c1ccc2c(c1)ccc1c3ccccc3ccc21
TOX24320	0	CCNCC
TOX24328	0	COc1ccc([C@@H]2CC(=O)c3c(O)cc(O[C@@H]4O[C@H](CO[C@@H]5O[C@@H](C)[C@H](O)[C@@H](O)[C@H]5O)[C@@H](O)[C@H](O)[C@H]4O)cc3O2)cc1O
TOX24340	0	COc1ncc(F)c2nc(S(=O)(=O)Nc3c(F)cccc3F)nn12
TOX24342	1	CCOC(=O)OC1=C(c2cc(C)ccc2C)C(=O)NC12CCC(OC)CC2
TOX24346	0	CC1=C2N=C(C=C3N=C(C(C)=C4[C@@H](CCC(N)=O)[C@](C)(CC(N)=O)[C@](C)([C@@H]5N=C1[C@](C)(CCC(=O)NC[C@@H](C)OP(=O)([O-])O[C@@H]1[C@@H](CO)O[C@H](n6cnc7cc(C)c(C)cc76)[C@@H]1O)[C@H]5CC(N)=O)N4[Co+]C#N)[C@@](C)(CC(N)=O)[C@@H]3CCC(N)=O)C(C)(C)[C@@H]2CCC(N)=O
TOX24347	1	COc1ccc(C(C)=O)cc1
TOX24352	0	COC(=O)Cc1ccccc1
TOX24353	0	CCOC(=O)Cc1ccccc1
TOX24354	0	CCCCN(CCO)CCO
TOX24355	0	c1ccc(CNCc2ccccc2)cc1
TOX24356	0	OCCNCc1ccccc1
TOX24357	0	COc1ccc(CO)cc1
TOX24359	0	O=C1CCCCCCCCCCCCCCO1
TOX2436	1	CC(CCC(=O)O)(c1ccc(O)cc1)c1ccc(O)cc1
TOX24360	0	CC(C)CCCC(C)CCO
TOX24361	1	NNC(=O)CCCCC(=O)NN
TOX24362	0	O=C1CCCC(=O)O1
TOX24363	0	CCCCCCCCCC(=O)OCC
TOX24364	1	BrCCCCBr
TOX24365	0	CC(C)(C)NC(N)=O
TOX24369	0	CN(C)c1ccncc1
TOX24370	0	CCCCNc1ccccc1
TOX24371	0	O=S(=O)(O)CCCN1CCOCC1
TOX24374	0	CC(=O)c1ccc(C)cc1
TOX24375	0	C=CCOCC(O)CO
TOX24378	0	CCCCC(CC)COC(=O)CC#N
TOX24380	0	O=C(C(=O)c1ccccc1)c1ccccc1
TOX24382	0	Cc1ncsc1CCO
TOX24383	1	c1ccc(Sc2ccccc2)cc1
TOX24384	0	CC(C)[C@@H]1CC[C@@H](C)CC1=O
TOX24388	0	CC1(C)CC(N)CC(C)(C)N1
TOX24389	0	COC(C)(C)CCO
TOX2439	0	O=C(O)c1ccccc1C(c1ccc(O)cc1)c1ccc(O)cc1
TOX24390	1	CNC(=S)NN
TOX24391	0	CC(C)c1ccccc1O
TOX24392	0	COc1ccc2ccccc2c1
TOX24393	0	CC(=N\O)/C(C)=N/O
TOX24394	1	CC(C)(C)C1CCC(=O)CC1
TOX24395	0	CCCCCCCCCCCCBr
TOX24396	0	COCCOCCOCCOCCOC
TOX24397	0	O=S(=O)(O)C(F)(F)F
TOX24398	0	C(=C/C=N/c1ccccc1)\C=C\Nc1ccccc1
TOX24399	0	O=P(O)(O)c1ccccc1
TOX244	0	NNC(N)=O
TOX24400	0	CCCC[N+](CCCC)(CCCC)CCCC
TOX24401	0	N=C(N)c1ccccc1
TOX24402	0	CC(=O)CC(=O)OC(C)(C)C
TOX24404	0	OCCSSCCO
TOX24405	1	N=C(N)NN
TOX24407	0	Cc1ccc(C(N)=O)cc1N
TOX24408	0	NCCN1CCOCC1
TOX24409	0	ClCCCCCCCl
TOX24410	0	O=S(=O)([O-])c1cc(O)ccc1O
TOX24411	0	CN1C(C)(C)CC(O)CC1(C)C
TOX24412	1	CC1CN(c2ccccc2)NC1=O
TOX24413	0	CCN1CCCC1=O
TOX24414	0	Nc1cc(C(=O)O)ccc1Cl
TOX2442	1	CCC(C)(c1ccc(O)cc1)c1ccc(O)cc1
TOX24420	0	O=S1(=O)OC(c2ccc([O-])cc2)(c2ccc(O)cc2)c2ccccc21
TOX24421	0	CC(=O)c1cccnc1
TOX24423	0	C[N+](C)=CCl
TOX24424	0	NCc1cccnc1
TOX24425	0	COC(=O)CCC(=O)O
TOX24427	0	O=CN1CCOCC1
TOX24428	0	CO[Si](CCCS)(OC)OC
TOX24429	1	O=C(Cl)c1cc(C(=O)Cl)cc(C(=O)Cl)c1
TOX24430	0	O=C(Cc1ccccc1)c1ccccc1
TOX24431	0	CC(C)(C)NCCO
TOX24433	0	O=C1CCCC(=O)C1
TOX24435	0	CCN(CC)CCOC(=O)c1ccc(N)cc1
TOX24436	0	CC(=O)C1CCOC1=O
TOX24437	0	Nc1cc(N)cc(C(=O)O)c1
TOX24438	0	O=C1CCCCO1
TOX24439	0	CCCCOC(=O)CC#N
TOX24440	1	CCC(C)c1cccc(C(C)CC)c1O
TOX24441	0	Cc1ccccc1CCl
TOX24443	0	CCCC[N+](C)(CCCC)CCCC
TOX24445	0	BrCc1ccc(Br)cc1
TOX24446	0	C[N+](C)(C)CC(=O)O
TOX24447	0	COc1cccc(C=O)c1
TOX24448	0	C=CCCC(=O)O
TOX2445	1	Oc1ccc(Cc2ccc(O)cc2)cc1
TOX24450	0	CCCOC(OCCC)OCCC
TOX24451	0	COC(=O)CCCCC(=O)O
TOX24452	0	BrCCCCCCBr
TOX24455	1	C=C(C)C(=O)OCCCCCCOC(=O)C(=C)C
TOX24456	0	Nc1cc[nH]c(=O)n1
TOX24458	0	O=S(=O)([O-])CCN1CCN(CCO)CC1
TOX2446	1	Oc1ccccc1Cc1ccccc1O
TOX24462	0	CCO[Si](OCC)(OCC)c1ccccc1
TOX24463	0	C=C[Si](OCC)(OCC)OCC
TOX24464	1	O=C1c2ccccc2C(=O)c2c(O)ccc(O)c21
TOX24465	0	Nc1ccc(S(=O)(=O)O)c(N)c1
TOX24466	0	O=C(O)c1cc(C(=O)O)c(C(=O)O)cc1C(=O)O
TOX24469	0	NCCOS(=O)(=O)O
TOX24470	0	CCC(=O)c1ccccc1
TOX24471	0	COC(=O)c1cccnc1
TOX24472	0	CCOC(=O)C(=O)OCC
TOX24473	0	O=S(=O)(O)c1ccc(Cl)cc1
TOX24475	0	CC(C)[C@H]1CC[C@@H](C)CC1=O
TOX24479	0	CCO[Si](CCCS)(OCC)OCC
TOX2448	1	CCc1cccc(C)c1N(C(=O)CCl)C(C)COC
TOX24481	1	O=C1CCCCCN1SSN1CCCCCC1=O
TOX24484	0	CC(C)CCCCCCN
TOX24485	1	CCOC(=O)C=CC(=O)O
TOX24486	0	CC(C)NC(=O)NC(C)C
TOX24488	0	N#CC1(N)CCCCC1
TOX24489	0	CC(=O)C(Cl)C(=O)N(C)C
TOX24490	0	COC(=O)c1sccc1S(N)(=O)=O
TOX24491	0	NC(=O)CN1CCCC1=O
TOX24493	0	CCO[Si](CCCNC(N)=O)(OCC)OCC
TOX24494	0	O=C(Cc1ccccc1)OCCc1ccccc1
TOX24495	0	CC(=O)CCc1ccc(O)cc1
TOX24496	0	CCCCCC1CCCC(=O)O1
TOX24498	0	CC[N+](C)(CC)CC
TOX245	0	NC(=O)NNc1ccccc1
TOX24502	0	OCCOc1cccc(OCCO)c1
TOX24503	1	O=C1c2ccccc2C(=O)C1c1nc2ccccc2c(Br)c1O
TOX24506	0	CC(=O)OCCc1ccccc1
TOX24508	1	Cl[Ba]Cl
TOX24509	1	O=C(O)c1nc(Cl)c(Cl)c(Cl)c1Cl
TOX24511	0	CCCOC(=O)CCCCC(=O)OCCC
TOX24513	0	CC(CCO)CCCC(C)(C)O
TOX24514	1	CCCCCCOC(=O)c1ccc(O)cc1
TOX24515	1	C=C(C)C(=O)OCCOCCOCCOCCOC(=O)C(=C)C
TOX24517	0	Cc1cc(N)n(-c2ccccc2)n1
TOX24518	1	CC1(C)C2=CCCC(C)(C)[C@]23CC[C@H]1C3
TOX24522	0	CCN(CC)C(=O)N(CC)CC
TOX24523	0	Cc1ccc(N)cc1S(=O)(=O)O
TOX24526	1	CCOc1ccc(NC(=O)CC(C)=O)cc1
TOX24527	1	O=C(CS)OCCOC(=O)CS
TOX24532	1	O=c1c2ccccc2c(=O)c2c1cc(Cl)c1[nH]c3c([nH]c12)c(Cl)cc1c(=O)c2ccccc2c(=O)c13
TOX24533	1	Clc1ccccc1-c1ccccc1Cl
TOX24534	0	CC(=O)Oc1ccc(C(C)=O)cc1
TOX24535	0	O=C1c2ccccc2C(=O)c2cc(S(=O)(=O)[O-])ccc21
TOX24536	1	CC(=O)c1cc(C(C)(C)C)cc2c1CCC2(C)C
TOX24537	1	CC(C)c1ccc2c(C(C)C)cc(C(C)C)c(S(=O)(=O)[O-])c2c1
TOX24541	0	CC1=CC(C)C(C=O)C(C)C1
TOX24543	0	O=S(=O)([O-])c1ccc2cc(O)c(S(=O)(=O)[O-])cc2c1
TOX24545	1	CN(C)c1ccc(O)c2c1C[C@H]1C[C@H]3[C@H](N(C)C)C(O)=C(C(N)=O)C(=O)[C@@]3(O)C(O)=C1C2=O
TOX24547	0	CCCCCCCC1CCCC1=O
TOX2455	0	COC(=O)c1ccccc1C(=O)OC
TOX24552	1	CC(=O)O[AlH3](O)OC(C)=O
TOX24553	0	Cc1ccccc1S(=O)(=O)[O-]
TOX24554	0	O=C([O-])c1cc(=O)c2c(OCC(O)COc3cccc4oc(C(=O)[O-])cc(=O)c34)cccc2o1
TOX24559	1	CCCN(CC1CC1)c1c([N+](=O)[O-])cc(C(F)(F)F)cc1[N+](=O)[O-]
TOX24561	0	CC(NC(C)(C)C)C(=O)c1cccc(Cl)c1
TOX24563	0	O=[PH]1Oc2ccccc2-c2ccccc21
TOX24564	0	CN(C)CCCN(C)CCCN(C)C
TOX24565	1	NCCCOCCOCCOCCCN
TOX24568	0	O=C1CCCCCCCCCCC(=O)OCCO1
TOX24570	0	NCCN
TOX24571	1	CC(C)c1cccc(O)c1
TOX24572	0	OCCC(F)(F)C(F)(F)C(F)(F)C(F)(F)C(F)(F)C(F)(F)F
TOX24573	1	CCC(C)(C)C1CCCCC1OC(C)=O
TOX24574	0	CC1=CC(C)C(C=O)CC1
TOX24575	1	O=C(C(Cl)Cl)N1CCOC12CCCCC2
TOX24576	0	CCOC(=O)CC(CC(=O)OCC)(OC(C)=O)C(=O)OCC
TOX24577	0	Br[Ca]Br
TOX24578	0	Cc1ccc(C)c(S(=O)(=O)[O-])c1
TOX24580	0	C=CCOCC(CO)(COCC=C)COCC=C
TOX24582	0	Cc1c(C)c([N+](=O)[O-])c(C(C)(C)C)c([N+](=O)[O-])c1C
TOX24584	0	C#CCN(C)[C@H](C)Cc1ccccc1
TOX24585	1	O=C1CN(N=Cc2ccc(-c3ccc([N+](=O)[O-])cc3)o2)C(=O)[N-]1
TOX24587	0	CCN(CCC#N)c1ccccc1
TOX24589	0	COC(=O)CCCC(=O)O
TOX24591	0	CCCCN1C(=O)c2ccccc2C1=O
TOX24593	1	c1ccc(C[n+]2cccc3ccccc32)cc1
TOX24595	0	CC(C)(C)C(=O)/C=C/c1ccc(Cl)cc1
TOX24597	0	Cc1cc(C)c(C(=O)P(=O)(C(=O)c2c(C)cc(C)cc2C)c2ccccc2)c(C)c1
TOX24598	0	CC(C)(CO)C(O)C(=O)NCCCO
TOX24599	0	CCCCCCCCOCCC#N
TOX246	0	NC(=O)Nc1ccc([As](=O)(O)O)cc1
TOX24600	0	OCC1CC=CCC1
TOX24603	0	N#CCCN(CCO)CCO
TOX24604	0	C=COCC1CCC(COC=C)CC1
TOX24606	0	Cc1ccc(NC(=O)N(C)C)cc1NC(=O)N(C)C
TOX24607	1	CCC(C)OC(=O)c1ccc(O)cc1
TOX24609	0	N#Cc1c(F)cccc1F
TOX24613	0	N#CC1(N=NC2(C#N)CCCCC2)CCCCC1
TOX24615	1	C=CC(=O)OCCOC(=O)C=C
TOX24616	0	CCCC[P+](CCCC)(CCCC)CCCC
TOX24617	0	N#CCc1cccc(C(F)(F)F)c1
TOX24618	0	COc1cccc(Br)c1
TOX24619	0	CCCCCCCCNC
TOX24620	0	COC(=O)c1ccc(C(=O)OC)c(C(=O)OC)c1
TOX24621	0	C[Si](C)(CCCN)O[Si](C)(C)CCCN
TOX24622	0	CCOC(=O)/C=C(/C)O[AlH3](OC(C)CC)OC(C)CC
TOX24623	1	C=CC(=O)OCCCCO
TOX24624	0	C=CC(=O)OCCCCCCCC
TOX24625	0	O=CN(CCO)CCO
TOX24626	1	O=c1n(CCCN2CCN(c3cccc(Cl)c3)CC2)nc2ccccn12
TOX24627	0	On1nnc2ccccc21
TOX24631	0	CC(=O)CC(=O)Nc1ccc2[nH]c(=O)[nH]c2c1
TOX24632	0	COP(=O)(O)OP(=O)(O)OC
TOX24633	0	CC1Cc2ccccc2N1NC(=O)c1ccc(Cl)c(S(N)(=O)=O)c1
TOX24635	1	C=Cc1ccc(S(=O)(=O)[O-])cc1
TOX24638	0	CCO[Si](C)(CCCOCC1CO1)OCC
TOX24642	1	CC(=O)OCCN(CCOC(C)=O)c1ccc(/N=N/c2ccc([N+](=O)[O-])cc2C#N)cc1
TOX24643	0	C[N+](C)(C)CC1CO1
TOX24644	0	CC(C)N1C(=O)c2ccccc2C1=O
TOX24645	1	NNc1nncc2ccccc12
TOX24646	0	CC1(C)COP(Oc2ccccc2)OC1
TOX24647	0	C#CCN(C)Cc1ccccc1
TOX24648	0	CO[Si](CCCNc1ccccc1)(OC)OC
TOX24650	0	Cc1ccc(N(CCO)CCO)cc1
TOX24654	0	CC(CCc1ccccc1)NCC(O)c1ccc(O)c(C(N)=O)c1
TOX24655	0	CCCCCCCCCCCC(=O)N(CC)CC
TOX24656	0	N#CCCOCCOCCC#N
TOX24660	0	SCCSCCS
TOX24662	0	CCCCCCCCSCC
TOX24663	0	CC(=O)Nc1cc(S(=O)(=O)[O-])cc2cc(S(=O)(=O)[O-])c(N=Nc3ccccc3)c(O)c12
TOX24664	0	CCOC(=O)NNc1nncc2ccccc12
TOX24667	0	CC(C)(C)NCCNC(C)(C)C
TOX24668	1	CC1=Nc2ccc3ccccc3c2C1(C)C
TOX24670	0	Clc1cccc(Cl)c1N=C1NCCN1
TOX24678	0	Cc1ccccc1C(OCCN(C)C)c1ccccc1.O=C(O)CC(O)(CC(=O)O)C(=O)O
TOX24679	0	CCCCCCCCP(=O)(O)O
TOX24680	0	NCCCN(CCO)CCO
TOX24681	0	CCN(CC)CCCC(C)Nc1ccnc2cc(Cl)ccc12
TOX24682	0	C=C(C)C(=O)NCCC[N+](C)(C)C
TOX24684	0	O=C([O-])C1=NN(c2ccc(S(=O)(=O)O)cc2)C(=O)C1
TOX24685	0	CCOc1ccc(OCC)c(Cl)c1
TOX24686	0	COc1cc(S(=O)(=O)Nc2ccccc2)c(OC)cc1N
TOX24689	0	COc1ccc(NC(=O)CC(C)=O)cc1
TOX24690	1	Cc1cccc(OCCOc2cccc(C)c2)c1
TOX24691	1	CC(C)c1ccc2sc3ccccc3c(=O)c2c1
TOX24696	0	O=C(CCN1CC1)OCC(CO)(COC(=O)CCN1CC1)COC(=O)CCN1CC1
TOX24697	0	C#CC(O)C(CC)CCCC
TOX24698	0	CCC(C)SSC(C)CC
TOX247	1	CNC(=O)Oc1cccc2ccccc12
TOX24701	0	COC(=O)c1ccccc1Cl
TOX24702	0	ON(Cc1ccccc1)Cc1ccccc1
TOX24703	0	N#Cc1ccc(Cl)cc1
TOX24706	0	NCCN1CCNC1=O
TOX24709	1	COc1ccc(OC)c(NC(=O)CC(C)=O)c1
TOX24710	0	Cc1ccc(Cl)c(N)c1Cl
TOX24712	0	COCc1ccc(COC)cc1
TOX24713	0	Nc1ccc2cc(S(=O)(=O)[O-])cc(O)c2c1/N=N/c1ccccc1C(F)(F)F
TOX24714	0	NC(=O)CC[C@H](Nc1ccc([N+](=O)[O-])cc1)C(=O)O
TOX24715	0	CC1(C)Cc2cccc(N)c2O1
TOX24716	0	O=C1CCCN1C1CCCCC1
TOX24718	1	COc1ccc(/N=N/c2cc(C)c(/N=N/c3ccc(S(=O)(=O)[O-])cc3)cc2OC)cc1
TOX24719	0	CCCOC(=O)c1c(Cl)c(Cl)c(Cl)c(Cl)c1C(=O)OCCC
TOX2472	0	CCCCc1ccccc1
TOX24720	0	Cc1ccnc(N)c1
TOX24721	1	CN(C)C(C)(C)CO
TOX24722	0	CC(=O)CC(=O)Nc1ccc(S(=O)(=O)[O-])cc1
TOX24723	0	CC(=O)O[AlH3](O)O
TOX24724	0	O=CO[AlH3](OC=O)OC=O
TOX24725	0	CCCCOC(=O)CO
TOX24727	0	CN(C1CCCCC1)C1CCCCC1
TOX24728	1	O=C(CCS)OCC(COC(=O)CCS)(COC(=O)CCS)COC(=O)CCS
TOX24731	1	O=C1NC(=O)c2cccc3cccc1c23
TOX24733	0	O=C([O-])c1cccc([N+](=O)[O-])c1
TOX24734	0	CN(C)CCOCCN(C)CCO
TOX24735	0	O=S(=O)([O-])c1cccc(S(=O)(=O)[O-])c1
TOX24737	1	CCOc1cc([N+](=O)[O-])c(OCC)cc1N1CCOCC1
TOX24738	1	CCOC(=O)C1=NN(c2ccccc2)C(=O)C1
TOX2474	1	C[C@]12C[C@H](O)[C@H]3[C@@H](CCC4=CC(=O)CC[C@@]43C)[C@@H]1CC[C@@H]2C(=O)CO
TOX24740	0	CC(C)OC(=O)CCC(=O)OC(C)C
TOX24742	0	NCCOCCOCCN
TOX24743	0	Nc1ccc2cc(S(=O)(=O)O)ccc2c1
TOX24744	0	CCc1nc(C)c[nH]1
TOX24745	0	CC1(C)C(=O)C(C)(C)C1=O
TOX24746	0	CC(C)OC(=O)c1ccccc1
TOX24747	0	CCCCNP(N)(N)=S
TOX24748	0	O=C(c1ccccc1)C1(O)CCCCC1
TOX24750	0	COc1ccc(N)c([N+](=O)[O-])c1
TOX24751	0	Nc1cc(S(=O)(=O)O)ccc1S(=O)(=O)O
TOX24752	1	C=CCOC(=O)/C=C\C(=O)OCC=C
TOX24753	0	CC(C)=CCCC(C)C=O
TOX24754	0	C=CCOC(=O)CCCCCC
TOX24755	0	C=CCOC(=O)CCC1CCCCC1
TOX24756	0	CC1=CC[C@H](CC=O)C1(C)C
TOX24757	0	CC(C)CCOC(=O)CC(C)C
TOX24758	1	CC(C)n1c(/C=C/[C@@H](O)C[C@@H](O)CC(=O)[O-])c(-c2ccc(F)cc2)c2ccccc21
TOX24759	0	C[SiH](C)O[Si](C)(C)O[Si](C)(C)O[SiH](C)C
TOX24760	0	Cl[Nd](Cl)Cl
TOX24762	0	CCO[Si](CCC1CCC2OC2C1)(OCC)OCC
TOX24763	1	CCOC(=O)c1ccc(N(C)C)cc1
TOX24764	0	CC(C)C(=O)OCCc1ccccc1
TOX24765	0	CC(=O)OCC=Cc1ccccc1
TOX24767	0	OCCc1ccccn1
TOX24768	0	Cn1c(=O)c2[nH]c(Br)nc2n(C)c1=O
TOX24769	0	CC(C=O)Cc1ccc(C(C)C)cc1
TOX24770	0	COc1ccc(COC(C)=O)cc1
TOX24771	0	CC(CC(C)C)=NO
TOX24772	0	CC(C)=CCCC(C)CCOC=O
TOX24773	1	C=C(C)C(=O)OCCOc1ccccc1
TOX24774	0	O=C1CCCCCCCCCCCC(=O)OCCO1
TOX24776	1	C=CC(=O)OCCC#N
TOX24777	0	CC(C)(O)C(=O)c1ccc(OCCO)cc1
TOX24779	1	C=CC(=O)OCCCCOC(=O)C=C
TOX24780	0	Cc1cc(Cl)c(C)cc1Cl
TOX24782	1	Nc1c(S(=O)(=O)O)cc(Br)c2c1C(=O)c1ccccc1C2=O
TOX24784	0	C=C(C)C(=O)OCCC(C)OC(=O)C(=C)C
TOX24785	0	CC1=NN(c2cccc(S(=O)(=O)O)c2)C(=O)C1
TOX24787	0	O=S(=O)(O)c1cc(O)c2ccc(Nc3ccccc3)cc2c1
TOX24788	0	O=S(=O)(O)c1ccc2ccccc2c1
TOX2479	0	CCc1ccccc1O
TOX24790	1	Cc1cccc(Nc2ccccc2)c1
TOX24791	0	CCC(=O)OCc1ccccc1
TOX24793	0	O=S(=O)([O-])CC(O)CCl
TOX24794	1	CC1(CO)CN(c2ccccc2)NC1=O
TOX24798	1	CC(C)CP(=S)([S-])CC(C)C
TOX24799	0	CC(C)(C)C1CCCCC1O
TOX248	0	c1ccc2c(c1)[nH]c1ccccc12
TOX2480	0	CCc1cccc(O)c1
TOX24800	1	CCCCN(CCCC)C(=S)[S-]
TOX24802	0	CCCCOCCOC(=O)CCCCCCCCC(=O)OCCOCCCC
TOX24804	1	CC(=O)NCCO
TOX24805	0	C1CC(COCC2CO2)CCC1COCC1CO1
TOX24807	0	COC(=O)CCCCCCCC(=O)OC
TOX24808	0	CC(C)(C)c1ccc(CCC=O)cc1
TOX24809	0	CCC(C)(O)CCC=C(C)C
TOX24810	1	CCC(C)CCCC(C)(C)O
TOX24811	0	Cc1cc(Cl)ccc1/N=C/N(C)C
TOX24812	0	COC(C)CCO
TOX24815	0	CCCCOC(=O)CCCCCCCC(=O)OCCCC
TOX24818	0	CCCCCCC(CO)CCCC
TOX24819	0	O=C([O-])c1cc(C(=O)O)cc(S(=O)(=O)O)c1
TOX24821	1	CCOC(=O)C(C#N)=C(c1ccccc1)c1ccccc1
TOX24822	0	CC(CCO)CCc1ccccc1
TOX24823	0	C=C(C)C(=O)[O-]
TOX24824	0	CC1=CCC(O)(C(C)C)CC1
TOX24825	1	CC(C)(C)c1cccc(O)c1
TOX24826	0	CC(C)CCCC(C)CC=O
TOX24827	0	CC(=O)OCC(C)OC(C)=O
TOX24828	0	C=CCCCCCCCCC(=O)OCC
TOX24830	0	CC(C)(O)C(=O)c1ccccc1
TOX24831	0	CCCCOC(=O)C(C)OC(=O)CCC
TOX24832	0	COC(C=C(C)CCC=C(C)C)OC
TOX24833	0	CCC(=O)OC(C)(C)C1CC=C(C)CC1
TOX24834	0	CP(=O)([O-])OCCC[Si](O)(O)O
TOX24835	0	N#Cc1ccc(CC(=O)c2cccc(C(F)(F)F)c2)cc1
TOX24836	1	O=C(c1ccc(O)cc1)c1ccc(O)cc1O
TOX24837	0	OCCC1CCCCN1
TOX24839	0	C=C[Si](OC(=C)C)(OC(=C)C)OC(=C)C
TOX24840	0	C=C(C)CS(=O)(=O)[O-]
TOX24842	0	C[Si](NC1CCCCC1)(NC1CCCCC1)NC1CCCCC1
TOX24844	0	CCCCCCCCOCCCN
TOX24845	0	CCCCOC(=O)CCS
TOX24846	1	O=Cc1ccc(Cl)c([N+](=O)[O-])c1
TOX24847	0	CC(C)OP(=O)(CP(=O)(OC(C)C)OC(C)C)OC(C)C
TOX24848	0	C=CC(=O)NCOCC(C)C
TOX24849	0	Nc1nc(=S)[nH][nH]1
TOX24852	1	c1cc(CCCc2ccncc2)ccn1
TOX24854	0	C=COCCCCO
TOX24856	0	CCOC(=O)NCCC[Si](OCC)(OCC)OCC
TOX24857	1	CCO[Si](CC(C)C)(OCC)OCC
TOX24858	0	c1ccc(-c2nnn[nH]2)cc1
TOX24860	0	Cc1cccc(N)n1
TOX24862	0	O=C(O)CCCCCCCCCC(=O)O
TOX24863	0	CCOC(=O)CC(C(C)=O)C(C)=O
TOX24867	0	C=C(C)C(=O)OCC(C)(C)COC(=O)C(=C)C
TOX24868	0	CC(=O)Nc1ccc(C)cc1C
TOX24869	1	c1ccc(CCCc2ccncc2)cc1
TOX24870	0	C=C(C)C(=O)OCCCCOC(=O)C(=C)C
TOX24872	1	c1cc(OCC2CO2)ccc1Cc1ccc(OCC2CO2)cc1
TOX24873	0	C=CC(=O)OCCCCCCCCCC
[truncated: 4,316 more rows]

## Sheet: 2. P. gingivalis
Bioactivity dataset 2. P. gingivalis
cid	Antimicrobial	SMILES
5904	1	CC1(C(N2C(S1)C(C2=O)NC(=O)CC3=CC=CC=C3)C(=O)O)C
155543311	1	C1=CC(=CC=C1C2=NC(=C(O2)C3=CC=C(C=C3)F)C4=CC=C(C=C4)F)N5C=C(N=N5)C6=NC(=NC(=N6)NC7=CC=C(C=C7)F)NC8=CC=C(C=C8)F
155511868	1	C1=CC=C(C(=C1)C2=NC(=C(O2)C3=CC=CO3)C4=CC=CO4)N5C=C(N=N5)C6=NC(=NC(=N6)NC7=CC=C(C=C7)F)NC8=CC=C(C=C8)F
155547676	1	CCN(CC)C1=NC(=NC(=N1)C2=CN(N=N2)C3=CC=C(C=C3)C4=NC(=C(O4)C5=CC=C(C=C5)Cl)C6=CC=C(C=C6)Cl)N(CC)CC
155510814	1	C1=CC=C(C=C1)C2=C(OC(=N2)C3=CC(=CC=C3)N4C=C(N=N4)C5=NC(=NC(=N5)NC6=CC=C(C=C6)F)NC7=CC=C(C=C7)F)C8=CC=CC=C8
155526320	1	C1=CC=C(C(=C1)NC2=NC(=NC(=N2)C3=CN(N=N3)C4=CC=CC(=C4)C5=NC(=C(O5)C6=CC=C(C=C6)F)C7=CC=C(C=C7)F)NC8=CC=CC=C8F)F
155536990	1	C1=CC(=CC(=C1)F)C2=CN(N=N2)C3=CC=C(C=C3)S(=O)CC4=NC(=C(O4)C5=CC=C(C=C5)F)C6=CC=C(C=C6)F
9552079	1	C1=CC(=CC=C1NC(=NC(=NCCCCCCN=C(N)N=C(N)NC2=CC=C(C=C2)Cl)N)N)Cl
5430	1	C1=CC=C2C(=C1)NC(=N2)C3=CSC=N3
155556298	1	C1=CC(=CC=C1C2=CN(N=N2)C3=CC=C(C=C3)S(=O)(=O)CC4=NC(=C(O4)C5=CC=C(C=C5)Cl)C6=CC=C(C=C6)Cl)F
155514204	1	COC1=CC=CC=C1C2=CN(N=N2)C3=CC=C(C=C3)S(=O)CC4=NC(=C(O4)C5=CC=C(C=C5)F)C6=CC=C(C=C6)F
155551278	1	C1=COC(=C1)C2=C(OC(=N2)C3=CC=C(C=C3)N4C=C(N=N4)C5=NC(=NC(=N5)NC6=CC=C(C=C6)F)NC7=CC=C(C=C7)F)C8=CC=CO8
155564793	1	C1=CC(=CC(=C1)N2C=C(N=N2)C3=NC(=NC(=N3)NC4=CC=C(C=C4)F)NC5=CC=C(C=C5)F)C6=NC(=C(O6)C7=CC=CO7)C8=CC=CO8
155565151	1	CCN(CC)C1=NC(=NC(=N1)C2=CN(N=N2)C3=CC=C(C=C3)C4=NC(=C(O4)C5=CC=C(C=C5)F)C6=CC=C(C=C6)F)N(CC)CC
155511434	1	C1=CC=C(C=C1)C2=C(OC(=N2)C3=CC(=CC=C3)N4C=C(N=N4)C5=NC(=NC(=N5)NC6=CC=CC=C6F)NC7=CC=CC=C7F)C8=CC=CC=C8
136092247	0	CCCCCCCCCC(=O)C1=CC(=C(C=C1)O)C2=NC3=C(N2)C=C(C=C3)C(F)(F)F
136092241	0	CCCCCCC(=O)C1=CC(=C(C=C1)O)C2=NC3=C(N2)C=C(C=C3)C
136092234	0	CCCCCCC(=O)C1=CC(=C(C=C1)O)C2=NC3=C(N2)C=C(C=C3)Cl
136092243	0	CCCCCCCCC(=O)C1=CC(=C(C=C1)O)C2=NC3=C(N2)C=C(C=C3)Cl
136092238	0	CCCCCCCCC(=O)C1=CC(=C(C=C1)O)C2=NC3=C(N2)C=C(C=C3)[N+](=O)[O-]
44339627	0	CCCC1C(=O)NCC(CC(C(CCC(=CCCCCCCCCCCCCCCC(=O)O1)C)O)O)O
44339513	0	CCCC1C(=O)NCC(C(C(C(C(CC=CCCCCCCCCCCCCCCC(=O)O1)O)O)O)O)O
44339514	1	CCCC1C(=O)NCC(C(C(C(C(CC=CCCCCCCCCCCCCCCC(=O)O1)O)O)O)O)O
10011185	0	CC1=C2C3=C(C=CC(=C3C(=C1)O)OC4C(C(C(C(O4)COC5C(C(C(CO5)O)O)O)O)O)O)OC6(C2=C(C(=O)C7=C(C=CC(=C76)OC8C(C(C(C(O8)COC9C(C(C(CO9)O)O)O)O)O)O)O)C)O
10350590	0	CC1=C2C3=C(C=CC(=C3C(=C1)O)OC4C(C(C(C(O4)COC5C(C(C(CO5)O)O)O)O)O)O)OC6(C2=C(C(=O)C7=C(C=CC(=C76)OC8C(C(C(C(O8)CO)O)O)O)O)C)O
24180567	1	CC(=CCCC(=CCOC1=C(C=C(C=C1)C=CC(=O)OC2=CC=CC=C2OC)OC)C)C
5320946	1	COC1=CC(=C2C(=C1)OC(=C(C2=O)O)C3=CC=C(C=C3)O)O
5281672	1	C1=C(C=C(C(=C1O)O)O)C2=C(C(=O)C3=C(C=C(C=C3O2)O)O)O
5280863	1	C1=CC(=CC=C1C2=C(C(=O)C3=C(C=C(C=C3O2)O)O)O)O
10011796	0	CC(C)CC(C(=O)NC(CC1=CNC2=CC=CC=C21)C(=O)NC(CCCCN)C(=O)NC(C(C)O)C(=O)NC(CC(C)C)C(=O)NC(CC(C)C)C(=O)NC(CCCCN)C(=O)NC(CCCCN)C(=O)NC(C(C)C)C(=O)NC(CC(C)C)C(=O)NC(CCCCN)C(=O)NC(C)C(=O)NC(C)C(=O)NC(C)C(=O)N)NC(=O)C(C)N
52945200	0	C1CC(N(C1)C(=O)CN)C(=O)N2CCCC2C(=O)N3CCCC3C(=O)NC(CCC(=O)N)C(=O)NCC(=O)NCC(=O)NC(CCCN=C(N)N)C(=O)N4CCCC4C(=O)NC(CCC(=O)N)C(=O)O
638278	1	C1=CC(=CC=C1C=CC(=O)C2=C(C=C(C=C2)O)O)O
5318339	0	CC1(C2CC3C1(C3C2)C)CC=CC(C)(C)O
15489689	1	CC(=C)C(=O)CCC1(C2CC3C1(C3C2)C)C
155384382	1	CN1C=C(C2=C1C=CC(=C2)[N+](=O)[O-])CC3=CC(=C(C=C3)OC)C(=O)NS(=O)(=O)C4=CC=CC=C4
155384384	1	CC1=CC=CC=C1S(=O)(=O)NC(=O)C2=C(C=CC(=C2)CC3=CN(C4=C3C=C(C=C4)[N+](=O)[O-])C)OC
54675776	1	CC1(C2CC3C(C(=O)C(=C(C3(C(=O)C2=C(C4=C1C=CC=C4O)O)O)O)C(=O)N)N(C)C)O
5717	1	CC1=CC=CC=C1S(=O)(=O)NC(=O)C2=CC(=C(C=C2)CC3=CN(C4=C3C=C(C=C4)NC(=O)OC5CCCC5)C)OC
155566592	0	CC12CCC(C1CCC3C2(CCC(C3(C)CC=O)C(C)(C)C(=O)OC)C)C(C)(CCC(C(C)(C)O)O)O
155563477	0	CC12CCC(C1CCC3C2(CCC(C3(C)CC(=O)O)C(C)(C)C(=O)OC)C)C(C)(CCC(C(C)(C)O)O)O
155548308	0	CC12CCC(C1CCC3C2(CCC(C3(C)C=CNC=O)C(C)(C)C(=O)OC)C)C4(CCC(O4)C(C)(C)O)C
44398495	0	CC(C)CC1C(=O)NC(C(=O)N1)COCC2=CC=CC=C2
25220884	0	CC(C)CC1C(=O)NC(C(=O)N1)C(C)C
13783106	0	CC1C(=O)NC(C(=O)N1)C(C)C
155565792	0	C1CC2C(=O)NC(C(=O)N2C1)CC3=CC=C(C=C3)OCC4=CC=CC=C4
6546049	0	CC(C)CC1C(=O)NC(C(=O)N1)CC2=CC=CC=C2
155559333	0	CC(C)CC1C(=O)NC(C(=O)N1)CCCN(C(=N)N)[N+](=O)[O-]
7076347	0	CC(C)CC1C(=O)NC(C(=O)N1)CC2=CC=CC=C2
676438	0	CC1C(=O)NC(C(=O)N1)C
9209568	0	CC1C(=O)NC(C(=O)N1)CCC(=O)N
13526522	0	C1=CC=C(C=C1)COCC2C(=O)NC(C(=O)N2)COCC3=CC=CC=C3
155548129	0	CC(C)CC1C(=O)NC(C(=O)N1)CC2=CC=C(C=C2)OCC3=CC=CC=C3
13783105	0	CC(C)C1C(=O)NC(C(=O)N1)CC2=CC=CC=C2
40578893	0	CC1C(=O)NC(C(=O)N1)CC2=CC=CC=C2
155530987	0	C1C(=O)NC(C(=O)N1)CCC(=O)OCC2=CC=CC=C2
102530187	0	CC1C(=O)NC(C(=O)N1)CC2=CC=C(C=C2)OCC3=CC=CC=C3
192731	0	CC(C)CC1C(=O)NC(C(=O)N1)CC(C)C
155542574	0	CCC(C)C1C(=O)NC(C(=O)N1)CC2=CC=CC=C2
155546296	0	CCC(C)C1C(=O)NC(C(=O)N1)COCC2=CC=CC=C2
155551300	0	C1=CC=C(C=C1)CC2C(=O)NC(C(=O)N2)CCCCNC(=O)OCC3=CC=CC=C3
76116	0	C1=CC=C(C=C1)CC2C(=O)NC(C(=O)N2)CC3=CC=CC=C3
155533727	0	CC(C)CC1C(=O)NC(C(=O)N1)CC2=CC=C(C=C2)[N+](=O)[O-]
155566344	0	CC(C)C1C(=O)NC(C(=O)N1)COCC2=CC=CC=C2
11438306	0	C1=CC=C(C=C1)CC2C(=O)NC(C(=O)N2)CC3=CC=C(C=C3)O
44398518	0	C1=CC=C(C=C1)CC2C(=O)NC(C(=O)N2)COCC3=CC=CC=C3
155538896	0	CC(C)CC1C(=O)NC(C(=O)N1)CN2C3=CC=CC=C3C=C2C=O
124207914	0	C1=CC=C(C=C1)CC2C(=O)NC(C(=O)N2)COCC3=CC=CC=C3
147696567	0	C1=CC(=CC=C1CC2C(=O)NC(C(=O)N2)CC3=CC=C(C=C3)[N+](=O)[O-])[N+](=O)[O-]
12575662	0	C1C2C(=O)N3CSCC3C(=O)N2CS1
102304523	0	C1=CC=C(C=C1)CC2C(=O)NC(C(=O)N2)CCCCN
44398621	0	C1=CC=C(C=C1)CC2C(=O)NC(C(=O)N2)CC3=CC=C(C=C3)OCC4=CC=CC=C4
101064669	0	C1=CC(=CC=C1CC2C(=O)NC(C(=O)N2)CCCN=C(N)N)O
131864097	0	C1=CC=C(C=C1)COCC2C(=O)NC(C(=O)N2)COCC3=CC=CC=C3
6542165	0	C1CC2C(=O)N3CCCC3C(=O)N2C1
155541320	0	C1=CC=C2C(=C1)C=C(N2CC3C(=O)NC(C(=O)N3)CN4C5=CC=CC=C5C=C4C=O)C=O
1477298	0	C1=CC=C(C=C1)CC2C(=O)NC(C(=O)N2)CC3=CC=CC=C3
44566899	0	CC(C)CC1C(=O)NC(C(=O)N1)C(C)C
7075896	0	CC(C)C1C(=O)NC(C(=O)N1)C(C)C
637596	0	CC(C)C1C(=O)NC(C(=O)N1)C(C)C
12206395	0	CC(C)CC1C(=O)NC(C(=O)N1)CC(C)C
44398596	0	CC(C)C1C(=O)NC(C(=O)N1)CC2=CC=C(C=C2)OCC3=CC=CC=C3
927723	0	CC(C)CC1C(=O)NCC(=O)N1
155535405	0	C1=CC=C(C=C1)CC2C(=O)NC(C(=O)N2)CC3=CC=C(C=C3)OCC4=CC=CC=C4
155542695	0	C1=CC=C(C=C1)COC2=CC=C(C=C2)CC3C(=O)NC(C(=O)N3)CC4=CC=C(C=C4)OCC5=CC=CC=C5
155557852	0	C1=CC=C(C=C1)CC2C(=O)NC(C(=O)N2)CC3=CC=C(C=C3)OCC4=CC=CC=C4
155524456	0	C1=CC=C(C=C1)CC2C(=O)NC(C(=O)N2)CC3=CC=C(C=C3)OCC4=CC=CC=C4
71624013	0	C1=CC=C(C=C1)COC(=O)NCCCCC2C(=O)NC(C(=O)N2)CCCCNC(=O)OCC3=CC=CC=C3
16395765	0	CCC(C)C1C(=O)NC(C(=O)N1)C(C)CC
44398517	0	C1=CC=C(C=C1)COC2=CC=C(C=C2)CC3C(=O)NC(C(=O)N3)CC4=CC=C(C=C4)OCC5=CC=CC=C5
13879946	0	CC1C(=O)NC(C(=O)N1)CC(C)C
124350775	0	C1=CC=C(C=C1)CC2C(=O)NC(C(=O)N2)CC3=CC=C(C=C3)O
124306166	0	CC(C)CC1C(=O)NC(C(=O)N1)C(C)C
155529401	0	C1=CC=C(C=C1)CC2C(=O)NC(C(=O)N2)CN3C4=CC=CC=C4C=C3C=O
155546037	0	C1=CC=C(C=C1)CC2C(=O)NC(C(=O)N2)COCC3=CC=CC=C3
23278156	0	CC(C)CC1C(=O)NC(C(=O)N1)CC(C)C
736756	0	C1CC2C(=O)N3CCCC3C(=O)N2C1
11267350	0	C1=CC(=CC=C1CC2C(=O)NC(C(=O)N2)CC3=CC=C(C=C3)O)O
165356	0	CC1C(=O)NC(C(=O)N1)C
155533576	0	CC(C)C1C(=O)NC(C(=O)N1)CC2=CC=C(C=C2)OCC3=CC=CC=C3
124306170	0	CC(C)CC1C(=O)NC(C(=O)N1)C(C)C
637595	0	C1=CC=C(C=C1)CC2C(=O)NC(C(=O)N2)CC3=CC=CC=C3
155554970	0	CC(C1C(=O)NC(C(=O)N1)C(C)OCC2=CC=CC=C2)OCC3=CC=CC=C3
155527889	0	CC(C)CC1C(=O)NC(C(=O)N1)CC2=CC=C(C=C2)OCC3=CC=CC=C3
676439	0	CC1C(=O)NC(C(=O)N1)C
155543213	0	C1=CC=C(C=C1)COC2=CC=C(C=C2)CC3C(=O)NC(C(=O)N3)CC4=CC=C(C=C4)OCC5=CC=CC=C5
155563556	0	C1=CC=C(C=C1)COC(=O)NCCCCC2C(=O)NC(C(=O)N2)CCCN(C(=N)N)[N+](=O)[O-]
13783108	0	CC1C(=O)NC(C(=O)N1)CC2=CC=CC=C2
6932481	0	C1CC2C(=O)N3CCCC3C(=O)N2C1
155546623	0	CC1C(=O)NC(C(=O)N1)CC2=CC=C(C=C2)OCC3=CC=CC=C3
13526521	0	C1=CC=C(C=C1)COCC2C(=O)NC(C(=O)N2)COCC3=CC=CC=C3
7074739	0	CC(C)CC1C(=O)N2CCCC2C(=O)N1
7076549	0	C1C(=O)NC(C(=O)N1)CC2=CC=CC=C2
928502	0	CC(C)CC1C(=O)NC(C(=O)N1)CC2=CC=CC=C2
155551464	0	CC(C)CC1C(=O)NC(C(=O)N1)CC2=CC=C(C=C2)OCC3=CC=CC=C3
155548737	0	C1=CC(=CC(=C1)N2C=C(N=N2)C3=NC(=NC(=N3)NC4=CC=C(C=C4)F)NC5=CC=C(C=C5)F)C6=NC(=C(O6)C7=CC=C(C=C7)F)C8=CC=C(C=C8)F
155521571	0	C1=CC=C(C=C1)C2=C(OC(=N2)CS(=O)C3=CC=C(C=C3)N4C=C(N=N4)C5=CC=CC=C5C(F)(F)F)C6=CC=CC=C6
155512544	0	CCN(CC)C1=NC(=NC(=N1)C2=CN(N=N2)C3=CC=C(C=C3)C4=NC(=C(O4)C5=CC=CC=C5)C6=CC=CC=C6)N(CC)CC
155541929	0	COC1=CC2=C(C=C1)C=C(C=C2)C3=CN(N=N3)C4=CC=C(C=C4)S(=O)(=O)CC5=NC(=C(O5)C6=CC=CC=C6)C7=CC=CC=C7
155544269	0	C1=CC=C(C=C1)C2=C(OC(=N2)CS(=O)(=O)C3=CC=C(C=C3)N4C=C(N=N4)C5=CN=CC=C5)C6=CC=CC=C6
155554787	0	C1=CC=C(C=C1)C2=C(OC(=N2)C3=CC=CC=C3N4C=C(N=N4)C5=NC(=NC(=N5)NC6=CC=C(C=C6)F)NC7=CC=C(C=C7)F)C8=CC=CC=C8
155519743	0	COC1=CC2=C(C=C1)C=C(C=C2)C3=CN(N=N3)C4=CC=C(C=C4)S(=O)CC5=NC(=C(O5)C6=CC=CC=C6)C7=CC=CC=C7
155523795	0	C1=CC=C(C(=C1)NC2=NC(=NC(=N2)C3=CN(N=N3)C4=CC=CC(=C4)C5=NC(=C(O5)C6=CC=CO6)C7=CC=CO7)NC8=CC=CC=C8F)F
155518104	0	COC1=CC=CC=C1C2=CN(N=N2)C3=CC=C(C=C3)S(=O)CC4=NC(=C(O4)C5=CC=CC=C5)C6=CC=CC=C6
155519176	0	COC1=CC=C(C=C1)C2=C(OC(=N2)C3=CC=CC=C3N4C=C(N=N4)C5=NC(=NC(=N5)NC6=CC=C(C=C6)F)NC7=CC=C(C=C7)F)C8=CC=C(C=C8)OC
155541159	0	C1=CC=C(C=C1)C2=C(OC(=N2)CS(=O)C3=CC=C(C=C3)N4C=C(N=N4)C5=CC=C(C=C5)F)C6=CC=CC=C6
155568076	0	C1=CC=C(C=C1)C2=C(OC(=N2)CS(=O)C3=CC=C(C=C3)N4C=C(N=N4)C5=CC(=CC(=C5)C(F)(F)F)C(F)(F)F)C6=CC=CC=C6
155535893	0	COC1=CC=C(C=C1)C2=C(OC(=N2)C3=CC(=CC=C3)N4C=C(N=N4)C5=NC(=NC(=N5)NC6=CC=C(C=C6)F)NC7=CC=C(C=C7)F)C8=CC=C(C=C8)OC
155549141	0	CCCCCC1=CC=C(C=C1)C2=CN(N=N2)C3=CC=C(C=C3)S(=O)CC4=NC(=C(O4)C5=CC=CC=C5)C6=CC=CC=C6
155549855	0	C1=CC=C(C(=C1)NC2=NC(=NC(=N2)C3=CN(N=N3)C4=CC=C(C=C4)C5=NC(=C(O5)C6=CC=CO6)C7=CC=CO7)NC8=CC=CC=C8F)F
155551431	0	C1=CC=C(C=C1)C2=C(OC(=N2)C3=CC=C(C=C3)N4C=C(N=N4)C5=NC(=NC(=N5)NC6=CC=CC=C6F)NC7=CC=CC=C7F)C8=CC=CC=C8
155515847	0	COC1=CC=C(C=C1)C2=C(OC(=N2)C3=CC=C(C=C3)N4C=C(N=N4)C5=NC(=NC(=N5)NC6=CC=C(C=C6)F)NC7=CC=C(C=C7)F)C8=CC=C(C=C8)OC
155544049	0	CCN(CC)C1=NC(=NC(=N1)C2=CN(N=N2)C3=CC=C(C=C3)C4=NC(=C(O4)C5=CC=CO5)C6=CC=CO6)N(CC)CC
155564991	0	C1=CC=C(C=C1)C2=C(OC(=N2)CS(=O)C3=CC=C(C=C3)N4C=C(N=N4)C5=CC=C(C=C5)OC6=CC=CC=C6)C7=CC=CC=C7
155527779	0	CCN(CC)C1=NC(=NC(=N1)C2=CN(N=N2)C3=CC=CC(=C3)C4=NC(=C(O4)C5=CC=C(C=C5)F)C6=CC=C(C=C6)F)N(CC)CC
155566126	0	C1=CC=C(C=C1)C2=C(OC(=N2)CS(=O)C3=CC=C(C=C3)N4C=C(N=N4)C5=CN=CC=C5)C6=CC=CC=C6
155535847	0	CCN(CC)C1=NC(=NC(=N1)C2=CN(N=N2)C3=CC=CC(=C3)C4=NC(=C(O4)C5=CC=CO5)C6=CC=CO6)N(CC)CC
155521673	0	C1=CC=C(C(=C1)NC2=NC(=NC(=N2)C3=CN(N=N3)C4=CC=C(C=C4)C5=NC(=C(O5)C6=CC=C(C=C6)Cl)C7=CC=C(C=C7)Cl)NC8=CC=CC=C8F)F
155539395	0	C1=CC=C(C=C1)C2=C(OC(=N2)C3=CC=C(C=C3)N4C=C(N=N4)C5=NC(=NC(=N5)NC6=CC=C(C=C6)F)NC7=CC=C(C=C7)F)C8=CC=CC=C8
155554387	0	CCN(CC)C1=NC(=NC(=N1)C2=CN(N=N2)C3=CC=CC(=C3)C4=NC(=C(O4)C5=CC=C(C=C5)OC)C6=CC=C(C=C6)OC)N(CC)CC
155559639	0	COC1=CC=C(C=C1)C2=C(OC(=N2)C3=CC(=CC=C3)N4C=C(N=N4)C5=NC(=NC(=N5)NC6=CC=CC=C6F)NC7=CC=CC=C7F)C8=CC=C(C=C8)OC
155567689	0	C1=CC=C(C=C1)C2=C(OC(=N2)CS(=O)(=O)C3=CC=C(C=C3)N4C=C(N=N4)C5=CC=CC=C5C(F)(F)F)C6=CC=CC=C6
162676284	0	COC1=C(C=C(C=C1)CC2=CNC3=CC=CC=C32)C(=O)NS(=O)(=O)C4=CC=CC=C4F
162648592	0	CN1C=C(C2=CC=CC=C21)CC3=CC(=C(C=C3)OC)C(=O)NS(=O)(=O)C4=CC5=CC=CC=C5C=C4
162646580	1	CN1C=C(C2=C1C=CC(=C2)[N+](=O)[O-])CC3=CC(=C(C=C3)OC)C(=O)NS(=O)(=O)C4=CC=CC(=C4)F
162646689	0	CN1C=C(C2=CC=CC=C21)CC3=CC(=C(C=C3)OC)C(=O)NS(=O)(=O)C4=CC=CC(=C4)[N+](=O)[O-]
162647153	0	COC1=C(C=C(C=C1)CC2=CNC3=CC=CC=C32)C(=O)NS(=O)(=O)C4=CC5=CC=CC=C5C=C4
162654370	0	COC1=C(C=C(C=C1)CC2=CNC3=CC=CC=C32)C(=O)NS(=O)(=O)C4=CC=C(C=C4)F
162658036	1	CN1C=C(C2=C1C=CC(=C2)[N+](=O)[O-])CC3=CC(=C(C=C3)OC)C(=O)NS(=O)(=O)C4=CC=C(C=C4)[N+](=O)[O-]
162647428	0	CN1C=C(C2=CC=CC=C21)CC3=CC(=C(C=C3)OC)C(=O)NS(=O)(=O)C4=CC=CC(=C4)F
162663043	0	CN1C=C(C2=CC=CC=C21)CC3=CC(=C(C=C3)OC)C(=O)NS(=O)(=O)C4=CC=C(C=C4)F
168292812	1	CN1C=C(C2=C1C=CC(=C2)[N+](=O)[O-])CC3=CC(=C(C=C3)OC)C(=O)NS(=O)(=O)C4=CC=CC=C4Br
168275423	1	CN1C=C(C2=C1C=CC(=C2)[N+](=O)[O-])CC3=CC(=C(C=C3)OC)C(=O)NS(=O)(=O)C4=CC=CC=C4Cl

## Sheet: 3. HSV-1
Bioactivity dataset 3. HSV-1
cid	Activity	Canonical_smiles
596	0	CC(C)CCCCCCCCCCCCC(=O)NCC(=O)NC1C(C)OC(Nc2ncnc3nc[nH]c23)C(O)C1O
1318	1	NC1=C(Cl)C(=O)c2ccc(S(N)(=O)=O)cc2C1=O
1570	1	O=C1NC2C(=CC(O)C(O)C2O)c2cc3c(c(O)c21)OCO3
1821	1	OCC1OC(n2ccc3c(NO)ncnc32)C(O)C1O
2199	1	Cc1ccc(S(=O)(=O)/N=C2\C=C(Nc3ccc(O)cc3)C(=O)c3ccccc32)cc1
2754	0	COc1ccc(C[C@H]2NC[C@H](O)[C@H]2OC(C)=O)cc1
3197	1	CCCCCCCCCC[n+]1cccc2c3ccccc3ccc21.[I-]
3213	1	CC1OC(CC(=O)O)CC2=C1C(=O)c1c(O)cccc1C2=O
3385	0	CC(=O)OC1(C)CC(C)C(=O)C(C(O)CC2CC(=O)NC(=O)C2)C1
3458	1	C=CC[n+]1c(/C=C2\C=Cc3cc(C)ccc3N2CC)ccc2ccccc21.[Br-]
3542	0	CC1=CC2OC3CC4OC(=O)C=CC=CC(C(C)O)OCC(O)C5(C)OC5C(=O)OCC2(CC1O)C4(C)C31CO1
3832	1	C[C@H]1C[C@H](C)C(=O)[C@H]([C@H](O)CC2CC(=O)NC(=O)C2)C1
3879	1	C[C@@H]1O[C@@H](O[C@@H]2C=C3CC[C@@H]4C(CC[C@]5(C)[C@@H](c6ccc(=O)oc6)CC[C@]45O)[C@@]3(C)CC2)[C@H](O)[C@H](O)[C@H]1O
4112	0	O=C1NC2C(=CC(O)C(O)C2O)c2cc3c(cc21)OCO3
4212	0	NC(=O)c1cn(C2OC(CO)C(O)C2O)c2ncnc(N)c12.O
4491	1	CC(=O)OC1C(=O)OCC23CCC4(C)OC4C2OC2CC(OC(=O)C=CC=CC(=O)OCCC1C)C3(C)C21CO1
4605	1	COC1=C(C)C(=O)C2=C(C1=O)C(CO)N1C(C#N)C3CC4C(C1C2N1CCOC41)N3C
4749	1	C[n+]1c2cc(N)ccc2cc2ccc(N)cc21.Cl.[Cl-]
4931	0	Cc1ccc(-c2cc(-c3ccccc3)cc(-c3ccccc3)[n+]2-c2ccccc2)cc1.[O-][Cl+3]([O-])([O-])[O-]
5043	1	COc1ccc(CC2NCC(O)C2OC(C)=O)cc1
5100	1	COc1cccc2c1C(=O)c1c(O)c3c(c(O)c1C2=O)CC(O)(C(C)=O)CC3OC1CC(N(C)C)C(O)C(C)O1
5153	1	COc1ccc(S(=O)(=O)/N=C2\C=C(Nc3ccc(O)cc3)C(=O)c3ccccc32)cc1
5154	1	CC(=O)OC1CC2OC3C=C(C)CCC3(C)C1(C)C21CO1
5303	1	COc1cccc(N2CCN(c3ncnc4c3[nH]c3ccc(F)cc34)CC2C)c1
5396	0	CC[C@H]1CN2CCc3cc(OC)c(OC)cc3C2C[C@@H]1C[C@H]1NCCc2cc(OC)c(OC)cc21.Cl.O
5614	1	CCN(CC)c1ccc(C(=C2C=CC(=[N+](CC)CC)C=C2)c2ccc(N(CC)CC)cc2)cc1.[Cl-]
5790	1	CC(=O)OC[C@]12CCC(C)=C[C@H]1O[C@@H]1[C@H](O)[C@@H](OC(C)=O)[C@@]2(C)[C@]12CO2
6084	0	CC(=O)O[C@H]1C[C@@H]2OC3C=C(C)CCC3(C)[C@@]1(C)[C@@]21CO1
6099	1	CCC(C)(O)C(=O)OC1C(=O)OC2CC3C(C)=CC(=O)C(O)C3(C)C3C4(O)OCC23C1C(C)C4O
6185	1	Cc1ccc(C(=O)Sc2cccccc2=O)cc1
6197	1	CC1OC2CC(=O)OC2C2=C1C(=O)c1c(O)cccc1C2=O
6245	1	Br.CCCCCCCCn1c2c(c(=N)c3c1CCC3)CCCC2
6253	0	N#Cc1c(N)n(C2OC(CO)C(O)C2O)c2ncnc(N)c12
6763	1	CCN1/C(=C/C=C/C2=[N+](CC)c3ccccc3C2(C)C)C(C)(C)c2ccccc21.[O-][Cl+3]([O-])([O-])[O-]
6769	0	CCCOC(=O)c1ccc(-[n+]2c(-c3ccccc3)cc(-c3ccccc3)cc2-c2ccccc2)cc1.[O-][Cl+3]([O-])([O-])[O-]
6796	0	C[C@@H]1O[C@@H](O[C@@H]2C=C3CCC4C(CC[C@]5(C)[C@@H](c6ccc(=O)oc6)CC[C@]45O)[C@@]3(C)CC2)[C@H](O)[C@H](O)[C@H]1O
6842	1	COc1cccc2c1C(=O)c1c(O)c3c(c(O)c1C2=O)CC(O)(C(=O)CO)CC3OC1CC(N(C)C)C(O)C(C)O1
7085	0	CC[C@H]1CN2CCc3cc(OC)c(OC)cc3[C@@H]2C[C@@H]1C[C@H]1NCCc2cc(OC)c(OC)cc21.Cl
7578	0	CCN1/C(=C/C=C/c2oc3ccc(-c4ccccc4)cc3[n+]2CC)Oc2ccc(-c3ccccc3)cc21.CCOS(=O)(=O)[O-]
8467	0	OCCCNc1c2ccccc2nc2ccccc12
8975	1	Cc1ccc(-n2c(-c3ccc(Br)cc3)c[n+]3c2CCc2ccc4cccnc4c2-3)cc1.[Br-]
9283	1	Br.CCCCCCCCCCn1c2c(c(=N)c3c1CCC3)CCC2
9444	1	O=C1C(Nc2ccc(O)cc2)=C/C(=N/S(=O)(=O)c2cccs2)c2ccccc21
10662	0	Cc1ccc(-c2cc(-c3ccc(C)cc3)[n+](-c3ccccc3)c(-c3ccc(C)cc3)c2)cc1.[O-][Cl+3]([O-])([O-])[O-]
11293	1	OCCCNc1nccc(-c2cc(Nc3cccc(Cl)c3)ncn2)n1
11352	1	Br.CCCCCCn1c2c(c(=N)c3c1CCC3)CCC2
12456	0	Nc1ncnc2c1ccn2[C@@H]1O[C@H](CO)[C@@H](O)[C@H]1O
14710	1	CN(C)c1ccc(C=c2c3ccccc3n3c2cc(-c2ccccc2)[n+]3C)cc1.O=S(=O)([O-])C(F)(F)F
15478	1	Cc1cc(C)nc(NC(N)=NCCc2ccccc2)n1
16955	1	CC1OC(OC2CC(O)C3(CO)C4C(O)CC5(C)C(C6=CC(=O)OC6)CCC5(O)C4CCC3(O)C2)C(O)C(O)C1O
17201	1	Cc1cc2c(=Cc3ccc(N(C)C)cc3)c3ccccc3n2[n+]1C.O=S(=O)([O-])C(F)(F)F
18283	0	C[C@H]1O[C@@H](OC2CC[C@]3(C=O)[C@H]4CC[C@]5(C)[C@@H](C6=CC(=O)OC6)CC[C@]5(O)[C@@H]4CC[C@]3(O)C2)CC2OC(C)(C)OC21
19103	0	C[C@H]1O[C@@H](O[C@H]2[C@@H](O)C[C@H](O[C@H]3[C@@H](O)C[C@H](O[C@H]4CC[C@]5(C)[C@H]6C[C@@H](O)[C@]7(C)[C@@H](C8=CC(=O)OC8)CC[C@]7(O)[C@@H]6CC[C@@H]5C4)O[C@@H]3C)O[C@@H]2C)C[C@H](O)[C@@H]1O
20345	1	CC[C@H](C)C1C(=O)N(C)[C@@H](C(C)C)C(=O)N(C)[C@@H](COC)C(=O)N2CCC[C@H]2C(=O)N(C)[C@@H](C(C)C)C(=O)N2CCC[C@H]2C(=O)O[C@H](CC)CCC[C@@H](O)[C@@H](C)C(=O)O[C@H](C)[C@@H](C)C/C=C(C)/C(OC)=C\C(=O)N1C
21436	0	CC(=O)OC[C@]12CC[C@@H]3[C@@]4(C)CCCC(C)(C)[C@@H]4CC[C@@]3(C)[C@@H]1CC(C1=CC(=O)OC1O)O2
22324	1	COC1C(O)C(C)OC(OC2CCC3(C=O)C(CCC4C3CCC3(C)C(C5=CC(=O)OC5)CCC43O)C2)C1O
23205	1	CC(NC(=O)Nc1nnc(C(F)(F)F)s1)(C(F)(F)F)C(F)(F)F
24466	1	COc1ccc(-c2n(CC(=O)OC3CC(C)CCC3C(C)C)c3ccccc3[n+]2C)cc1.[Cl-]
26964	0	CC[n+]1c(C=C2C=C(C)OC(C)=C2)sc2ccccc21.[Cl-]
32875	1	Nc1ncnc2c(C3OC(CO)C(O)C3O)scc12
36431	0	C=C(C(=O)c1ccccc1)C(NC(C)(C)C)c1ccccc1
36462	0	CCOC(=O)[C@]12Cc3cc(Cl)ccc3[C@H]1N(C1CCCCC1)C(=O)c1ccccc12
38777	0	COc1cc(SC)ccc1C(=O)Nc1nc2ccccc2[nH]1
40586	1	CC1CCC(C(C)C)C(OC(=O)Cn2c(-c3ccc(F)cc3)[n+](C)c3ccccc32)C1.[Cl-]
41946	0	CCCCCCCC[n+]1cccc2c3ccccc3ccc21.[I-]
42640	1	CCC1=C(CC2NCCc3ccccc32)CC2c3cc(OC)c(OC)cc3CCN2C1
43795	0	COc1cc2c(oc(=O)c3cc(C)cc(OC)c32)c2c(C3OC(C)C(O)C(C)(O)C3O)ccc(O)c12
47508	1	Cc1ccccc1-[n+]1c(-c2ccccc2)cc(-c2ccccc2)cc1-c1ccccc1.[O-][Cl+3]([O-])([O-])[O-]
47522	0	CC1(C)CC(N2CCN(C(c3ccccc3)c3ccccc3)CC2)=CC(=[N+]2CCCCC2)C1.[I-]
52167	1	CCCCCC[n+]1ccccc1/C=C/c1ccc(N(C)C)cc1.[I-]
54368	1	CN(C)c1ccc(C=c2c3ccccc3n3c2c2c([n+]3C)CCCC2)cc1.O=S(=O)([O-])C(F)(F)F
60149	0	C[C@H]1C[C@@H](C)C(=O)[C@@H]([C@H](O)CC2CC(=O)NC(=O)C2)C1
60699	1	CCCCCCCn1c2c(c(=N)c3ccccc31)CCC2.I
62770	1	Br.CCCCCCCCCn1c2c(c(=N)c3c1CCC3)CCCC2
63118	0	CC1CCC(C(C)C)C(OC(=O)Cn2c(-c3ccccc3)[n+](C)c3ccccc32)C1.[Cl-]
64983	1	COc1ccc(NC(=O)/C(Cl)=C(/Cl)S(=O)Cc2ccccc2)cn1
65237	1	C=C1C(=O)O[C@@H]2C[C@@H](C)[C@@H]3C=CC(=O)[C@@]3(C)[C@@H](OC(=O)CC(=O)O[C@H]3[C@@H]4C(=C)C(=O)O[C@@H]4C[C@@H](C)[C@@H]4C=CC(=O)[C@@]34C)[C@H]12
66541	1	CC1OC(OC2C=C3CCC4C(CCC5(C)C(c6ccc(=O)oc6)CCC45O)C3(C)CC2)C(O)C(OC2OC(CO)C(O)C(O)C2O)C1O
67277	0	COc1ccc(-c2n(Cc3ccccc3)c3ccccc3[n+]2Cc2ccccc2)cc1.[Br-]
68094	1	Cc1cc(C)c(C(=O)/C=C/c2cccc3ccccc23)c(=O)[nH]1
70848	1	N#CC1c2ccccc2-n2nncc2CN1Cc1cc(Cl)cc(Cl)c1
71821	1	CCc1ccc(S(=O)(=O)/N=C2\C=C(Nc3ccc(O)cc3)C(=O)c3ccccc32)cc1
72402	1	COc1cccc2c1C(=O)c1c(O)c3c(c(O)c1C2=O)C[C@@](O)(C(C)=O)C[C@@H]3O[C@H]1C[C@H](N)[C@H](O)[C@H](C)O1.Cl
72438	1	Clc1ccc(C[n+]2c(-c3ccccc3)cc(-c3ccccc3)cc2-c2ccccc2)cc1.[O-][Cl+3]([O-])([O-])[O-]
72512	1	COc1ccc(CC2C(=O)NC(C)C(=O)N(C)C3Cc4ccc(cc4)Oc4cc(ccc4O)CC(C(=O)NC(C)C(=O)NC(C)C(=O)N2C)N(C)C3=O)cc1
72699	0	CSC1SCC2C(=O)N(C)C(C(C)C)C(=O)OCC(NC(=O)c3cnc4ccccc4n3)C(=O)NC(C)C(=O)N(C)C1C(=O)N(C)C(C(C)C)C(=O)OCC(NC(=O)c1cnc3ccccc3n1)C(=O)NC(C)C(=O)N2C
72810	1	C=C1C(=O)O[C@@H]2C[C@@H](C)[C@@H]3C4OC4C(=O)[C@@]3(C)[C@@H](O)[C@H]12
72908	0	Cc1oc(-c2ccc(Cl)cc2)nc1CN1CCCC(C(=O)N2CCN(C(=O)c3ccco3)CC2)C1
73427	1	CN1/C(=C\C=C2/SC(=S)NC2=O)C(C)(C)c2ccccc21
73549	1	O=[N+]([O-])c1ccccc1-c1cc(-c2ccccc2)cc(-c2ccccc2)[n+]1Cc1ccccc1Cl.[O-][Cl+3]([O-])([O-])[O-]
76357	1	O=C(NC1CCCc2c1cnn2-c1ccccc1F)c1ccncc1
77917	0	O=c1cc(-c2ccc(O)cc2)oc2ccc3ccccc3c12
78379	0	CCCCOCCCNc1ncnc2c1[nH]c1ccccc12
79858	1	C[C@@H]1O[C@@H](O[C@H]2C[C@@H](O)[C@]3(CO)[C@@H]4C(CC[C@]3(O)C2)[C@@]2(O)CC[C@H](C3COC(=O)C3)[C@@]2(C)C[C@H]4O)[C@H](O)[C@H](O)[C@H]1O
82498	1	CC[n+]1c(/C=C2\Sc3ccccc3N2C)ccc2cccc(C)c21.[I-]
83851	1	CN(C)c1ccc(CC(=O)N2CCCC(c3cc(C(=O)Nc4ccc(C(C)(C)C)cc4)no3)C2)cc1
87372	1	Cl.N=c1c2c(n(Cc3cccc(Cl)c3)c3c1CCC3)CCCC2
91378	1	COc1ccc(S(=O)(=O)NCc2ccncc2)cc1Cl
91467	1	CCN(C(=O)c1ccc(C(C)(C)C)cc1)c1nnc(Cn2nnc3ccccc32)s1
91754	1	COc1cc(/C=C/C(=O)Nc2ccc(OC)c(S(=O)(=O)N3CCOCC3)c2)ccc1OC(F)F
93149	1	CN(Cc1ccc(OC(F)F)cc1)C(=O)c1cccc(S(=O)(=O)N2CCN(c3ccccc3)CC2)c1
93572	1	O=C(Nc1ccc(Oc2cccnc2)cc1)C1CCN(Cc2cccc(Cl)c2)CC1
96015	1	Cc1cc(SCC(=O)c2ccccc2)n2nc(C)nc2n1
97662	0	NS(=O)(=O)c1ccc(NC(=S)N2CCN(c3ccc(Cl)c(Cl)c3)CC2)cc1
97976	0	NS(=O)(=O)c1ccc(CCNc2nn3c(-c4cccc(OC(F)(F)F)c4)cnc3s2)cc1
98614	0	COc1ccc(C(=O)Nc2ccc(C)cn2)c(OC)c1
99927	1	NC(=O)c1cn(C2OC(CO)C(O)C2O)c2ncnc(N)c12
99938	0	Br.CCCCCCCCCCCCn1ccc(=N)cc1
100158	1	COc1ccc2cc3[n+](cc2c1OC)CCc1cc2c(cc1-3)OCO2.Cl
101486	0	COc1ccc(CCN2C(=O)CSC2=Nc2ccc(C(C)C)cc2)cc1OC
104830	1	Cc1ccc(-n2c(C)c([N+](=O)[O-])c3ccc(O)c(CN(C)C)c32)cc1
107346	1	CCCCCc1ccc(OCCC[n+]2ccccc2)c(CCCCC)c1.[Cl-]
108144	0	CCCCCn1c2c(c(=N)c3ccccc31)CCC2.I
108155	0	CC(=O)c1cccc(NS(=O)(=O)c2ccc(NC(=O)N3CCCCC3)cc2)c1
122723	0	CCC(C)(C)c1ccc(OCCCC[n+]2cccc(C)c2C)c(C(C)(C)CC)c1.[Br-]
122815	1	N=C1C=CC(=C(c2ccc(N)cc2)c2ccc(N)cc2)C=C1
124496	1	CC(=O)C(C(C)=O)c1c(Cl)c(O)c(O)c2c(C(=O)c3ccccc3)coc12
125322	0	CC1(C)CC(N2CCCC2)=CC(=[N+]2CCCCCC2)C1.[I-]
126941	0	COc1ccc(-c2csc3ncnc(NCCCO)c23)cc1
131182	1	Cc1cc(C)n(-c2ccc(C(=O)Nc3cccc(S(=O)(=O)N(C)C)c3)cc2)n1
131673	0	CC1CCc2nc(N)c(C#N)c(-c3cccnc3)c2C1
137226	1	COCC(C)n1c(-c2ccc3c(c2)NC(=O)CO3)csc1=Nc1ccc(OC(F)F)cc1
138252	1	NC(=O)c1sc2nc3c(c(-c4cccs4)c2c1N)CCCCC3
140230	1	CC(=O)c1cn(CC(=O)Nc2ccc(C)cc2C)c2ccccc12
145758	1	Cc1ccc(C#CC[N+]2(CC#Cc3ccc(C)cc3)CCCCC2)cc1.[Br-]
146600	0	Br.CCCCCCCCCCn1ccc(=N)cc1
148471	0	O=C(Nc1ccc(Br)cn1)C1CCN(S(=O)(=O)c2cccs2)CC1
148673	1	OCCCNc1cc(-c2ccnc(Nc3cccc(Cl)c3)n2)ccn1
148870	0	COc1ccc(-[n+]2c(-c3ccccc3)cc(-c3ccc(C)cc3)cc2-c2ccccc2)cc1.[O-][Cl+3]([O-])([O-])[O-]
149800	1	CC(C)CCCCCCCCCCCCC(=O)NCC(=O)NC1C(O)C(O)C(Nc2ncnc3nc[nH]c23)OC1C(O)CO
150655	1	Br.CCCCCCCn1c2c(c(=N)c3c1CCC3)CCCC2
151582	0	COc1cc2cc(C(=O)N3CC(COS(C)(=O)=O)c4ccc(O)cc43)[nH]c2c(OC)c1OC
152086	1	COc1ccc([C@@]23Oc4cc(OC)cc(OC)c4[C@]2(O)[C@H](O)[C@H](C(=O)N(C)C)[C@H]3c2ccccc2)cc1
156816	1	CC1CC(C)(O)CC(C(O)CC2CC(=O)NC(=O)C2)C1=O
159917	1	CC1=CC2OC3CC4OC(=O)C=CC=CC(=O)OCCC(C)C(O)C(=O)OCC2(CC1)C4(C)C31CO1
160386	1	COC(=O)C12OCC34C(CC5C(C)=C(O)C(=O)CC5(C)C3C(O)C1O)OC(=O)C(OC(=O)/C=C(\C)C(C)C)C24
164754	1	NC(=S)c1cn(C2OC(CO)C(O)C2O)c2ncnc(N)c12
167666	0	O=C(NNc1ccnc2cc(Cl)ccc12)C1CCCCC1
170158	0	CN1CCN(c2ccc([N+](=O)[O-])c3no[n+]([O-])c23)CC1
174343	1	CC(=O)OCC12CC(OC(=O)CC(C)C)C(C)=CC1OC1C(O)C(OC(C)=O)C2(C)C12CO2
174572	1	Nc1ncnc2c(C3OC(CO)C(O)C3O)c[nH]c12
175533	1	COC(=O)C12OCC34C(CC5C(C)=C(O)C(=O)CC5(C)C3C(O)C1O)OC(=O)C(OC(=O)C=C(C)C)C24
179617	1	CC[C@H](C)[C@@H]1NC(=O)[C@@H](CC(C)C)NC(=O)[C@H](C(C)C)NC(=O)[C@H]2CSSC[C@H](NC1=O)C(=O)N2
181390	1	CC1=CC2OC3CC4OC(=O)/C=C/C=CC(C(C)O)OCC(O)C(C)CC(=O)OCC2(CC1O)C4(C)C31CO1
182785	1	CC(=O)OC1C(O)C(C)OC(OC2C(OC(=O)C3CCC4C(C3)OC3(CC(OC(=O)/C=C/c5ccccc5)C(C)CO3)C43CO3)OC(C)C(O)C2OC(C)=O)C1O
182791	1	CC(=O)OC1C2(CC3N4C(=O)C5(CO)SSC4(CC31O)C(=O)N5C)OC(C)C(C)(C)C2=O
185146	0	O=C(CCl)Nc1cc(SCC(O)CO)cc([N+](=O)[O-])c1
188323	0	CC(N)C(=O)NC1C2C(=C(O)CC(O)C2O)C(=O)OC1(C)C(Cl)Cl
188677	1	O=C1N(c2ccccc2)C[C@@H]2C[C@@H](c3cc4ccccc4o3)N3CCC[C@@]123
198909	0	Cc1nc2c(O)c3c(c(O)c2nc1C)C1C=CC3CC1
201764	0	Br.CCCCCCCCn1c2c(c(=N)c3ccccc31)CCC2
206388	1	COc1ccc(S(=O)(=O)Nc2cc(Sc3ncn[nH]3)c(O)c3ccccc23)cc1
218061	0	CCC(C)C1NC(=O)C(NC(=O)C(CC(C)C)N(C)C(=O)C2CCCN2C(=O)C(C)O)C(C)OC(=O)C(Cc2ccc(OC)cc2)N(C)C(=O)C2CCCN2C(=O)C(CC(C)C)NC(=O)[C@H](C)C(=O)[C@H](C(C)C)OC(=O)CC1O
219563	1	O=C1C(=O)c2cccnc2-c2ncccc21
219642	0	COc1ccc(C[C@H](N)C(=O)N[C@@H]2[C@@H](CO)O[C@@H](n3cnc4c(N(C)C)ncnc43)[C@@H]2O)cc1.Cl
221850	1	COC(C(=O)C(O)C(C)O)C1Cc2cc3cc(OC4CC(OC5CC(O)C(O)C(C)O5)C(O)C(C)O4)c(C)c(O)c3c(O)c2C(=O)C1OC1CC(OC2CC(OC3CC(O)C(OC)C(C)O3)C(O)C(C)O2)C(O)C(C)O1
223708	1	Nc1ccc2c(c1)C(=O)C(=O)c1ccccc1-2
224618	0	O=[N+]([O-])c1ccc(Sc2cccc[n+]2[O-])c2nonc12
225906	0	Nc1nc(F)nc2c1ncn2[C@@H]1O[C@H](CO)[C@@H](O)[C@H]1O
228297	0	CCC1CN2CCc3cc(OC)c(OC)cc3C2CC1CC1NCCc2c1[nH]c1ccc(O)cc21
228424	1	CCN(CC)c1ccc(C(=C2C=CC(=[N+](CC)CC)C=C2)c2ccccc2)cc1.O=S(=O)(O)O
230487	0	CC1CC(C)CC(C)C(O)C(C#N)=CC=CCC(C2CCCC2C(=O)O)OC(=O)CC(O)C(C)C1
230508	1	COc1ccc(-c2cc(-c3nc4ccccn4c3NCc3ccccc3)ccc2OC)cc1.O=C(O)C(F)(F)F
230794	0	O=C1NC2C(O)C(O)C(O)C(O)C2c2cc3c(c(O)c21)OCO3
231422	1	COc1ccc(CC2C(=O)NC(C)C(=O)N(C)C3C(=O)N(C)C(Cc4ccc(O)c(c4)Oc4ccc(cc4)C3O)C(=O)NC(C)C(=O)NC(C)C(=O)N2C)cc1
231435	1	CC1CCOC(=O)C=CC=CC(=O)OC2CC3OC4C5OC5(C)CCC4(COC(=O)C1O)C2(C)C31CO1
232136	1	CCN(CC)c1ccc2nc3ccc(N)cc3[n+](-c3ccccc3)c2c1.[Cl-]
232850	0	COc1cc(N(C)C)ccc1C=c1c2ccccc2n2c1cc(-c1ccccc1)[n+]2C.O=S(=O)([O-])C(F)(F)F
233768	1	CC(=O)OC1CC(OC2C(O)CC(OC3C(O)CC(OC4CCC5(C)C(CCC6C5CCC5(C)C(C7=CC(=O)OC7)CCC65O)C4)OC3C)OC2C)OC(C)C1OC1OC(CO)C(O)C(O)C1O
233874	1	CC(C)CC(=NNC(=O)c1ccncc1)c1cc(Cl)ccc1O
234265	0	CC(C)CC(NC(=O)CCCNC(=O)CCC(=O)OC1O[C@H]2OC3(C)CC[C@H]4[C@H](C)CCC(C1C)C24OO3)C(=O)O
235262	1	CN(C)c1ccc(C=c2c3ccccc3n3c2cc(-c2ccc(Cl)cc2)[n+]3C)cc1.O=S(=O)([O-])C(F)(F)F
235292	0	O=C(N/N=C/c1c(O)ccc2ccccc12)c1cccnc1
237305	1	CC(C)(O)/C=C/C(=O)C(C)(O)C1C(O)CC2(C)C3CC=C4C(C=C(O)C(=O)C4(C)C)C3(C)C(=O)CC12C
237586	0	OCC1OC(n2cnc3c(NCc4ccccc4O)ncnc32)C(O)C1O
240688	0	O=C(OC12CC3CC(CC(C3)C1)C2)c1ccc(NCc2cc(O)ccc2O)cc1
240739	1	O=C(/C=C/c1cccs1)NC(=S)NNC(=O)c1ccccc1O
240980	1	Br.CCCCCCCCCn1ccc(=N)cc1
241689	1	CCN(CC)c1ccc(/C=C/c2cccc[n+]2C)c(OC)c1.[I-]
243725	1	S=C(NCCCCN(Cc1ccc(Cl)cc1)c1ccc(Br)cn1)NCCCc1cnc[nH]1
244087	0	COC1C=CC=C(C)C(=O)NC2=CC(=O)C(N)=C(CC(C)CC(OC)C(O)C(C)C=C(C)C1OC(N)=O)C2=O
244159	0	CCN(CC)C1=NC(=[N+](CC)CC)c2ccccc21.[O-][Cl+3]([O-])([O-])[O-]
245940	0	CC(=NNC(=S)Nc1ccccc1)c1ccccn1
247955	1	Cc1cc(Br)c(OCc2ccc(C(=O)N/N=C/c3ccc[nH]3)cc2)c(Br)c1
252116	1	CCOc1ccc(-c2cc(C)[n+](CCc3ccc(OC)c(OC)c3)c(-c3ccc(OCC)cc3)c2)cc1.[O-][Cl+3]([O-])([O-])[O-]
252247	0	COc1ccc(Br)cc1/C=C/C(=O)c1ccc(NC(C)=O)cc1
253602	1	CCOC(=O)[C@]12Cc3ccccc3[C@H]1N(C1CCCCC1)C(=O)c1cc(OC)ccc12
254021	1	Cc1ccc(NC(=O)O/N=C/c2c(C)nn(C(C)(C)C)c2C)cc1Cl
254722	1	CC[n+]1c(/C=C/C=C/c2ccc(N(C)C)cc2)sc2ccccc21.[O-][Cl+3]([O-])([O-])[O-]
255761	0	Cc1ccc2[nH]c3c(c2c1)CCCC3NC(=O)CCl
255762	0	C[C@]12CC[C@H]3[C@@H](CC[C@]4(O)C[C@@H](O)CC[C@]34C=O)[C@@]1(O)CC[C@@H]2C1=CC(=O)OC1
256444	0	CCOC(=O)[C@]12Cc3cc(Cl)ccc3[C@H]1N(C1CCCCC1)C(=O)c1cc(OC)ccc12
257278	0	CC1=CC(=Cc2sc3ccccc3[n+]2C)C=C(C)O1.[O-][Cl+3]([O-])([O-])[O-]
260168	1	Cn1ncnc2c(=O)n(C)c(=O)nc1-2
260743	0	On1ccccc1=S
260976	1	CCOC(=O)[C@]12Cc3cc(OC)ccc3[C@H]1N(C1CCCCC1)C(=O)c1ccccc12
261711	0	CC(C)(C)c1ccc(C2CC2C(=O)N/N=C\c2ccc[nH]2)cc1
262093	1	Br.O=C(N/N=C/c1sc(N2CCOCC2)nc1-c1ccccc1)c1cccc(S(=O)(=O)N2CCOCC2)c1
262537	1	COc1ccc(-[n+]2c(C)cc(/C=C3\Sc4ccccc4N3C)cc2C)cc1.[I-]
263261	0	CC(C)CC[n+]1ccccc1/C=C/c1ccc(N(C)C)cc1.[I-]
263609	0	CCCN(CCC)C1=CC(=[N+]2CCCC2)CC(C)(C)C1.[I-]
263866	0	CCOc1ccc(OCc2ccc(C(=O)NN=Cc3ccc[nH]3)cc2)cc1
264160	0	CCC(C)(O)C(=O)OC1C(=O)OC2CC3C(C)=CC(O)C(O)C3(C)C3C4(O)OCC23C1C(C)C4O
264201	1	COc1cc(/C=C2\CC(C)C/C(=C\c3cc(OC)c(OC)c(OC)c3)C2=O)cc(OC)c1OC
264732	0	CC(=O)NC(c1ccc(Cl)cc1)c1ccc2cccnc2c1O
265001	0	C[C@]12CC[C@H](O)C[C@H]1CC[C@@H]1[C@@H]2CC[C@]2(C)[C@@H](C3=CC(=O)OC3)CC[C@]12O
265037	0	O=C(NC(Nc1nc2ccc([N+](=O)[O-])cc2s1)(C(F)(F)F)C(F)(F)F)c1ccccc1
265439	0	Cn1c2c(c(=O)n(C)c1=O)C(C(F)(F)F)(C(F)(F)F)N=C(c1ccc(Cl)cc1)N2
265898	1	CCCCN=C[C@]12CCC(O)CC1(O)CCC1[C@@H]2CC[C@]2(C)[C@H](C3C=CC(=O)O3)CCC12O
265940	0	CC1=C(C(=O)OCc2ccc3c(c2)OCO3)C(c2ccc(F)cc2)NC(=O)N1
266923	1	CC(=O)OC1CC(OC2C(O)CC(OC3C(O)CC(OC4CCC5(C)C(CCC6C5CCC5(C)C(C7=CC(=O)OC7)C(O)CC65O)C4)OC3C)OC2C)OC(C)C1OC1OC(CO)C(O)C(O)C1O
266926	0	Cc1onc(-c2ccccc2)c1C(=O)NC(=S)NNC(=O)c1ccccc1O
268748	0	CCCOc1ccc(Br)cc1CSC(=N)N.Cl
268760	1	CC(C)(C)C(=O)/C(=C/c1cccc([N+](=O)[O-])c1)n1cncn1
268761	1	CC1=NN(c2nc3ccccc3[nH]2)C(=O)C1Cc1ccccc1
268762	1	COc1ccc(/C=C/c2cc(-c3ccc(C)cc3)o[n+]2C)cc1.F[B-](F)(F)F
268975	0	COc1cccc(/C=N/NC(=O)c2c(C)nc3ccc(Cl)cn23)c1O
269869	0	Cc1onc(-c2ccccc2)c1C(=O)NC(=S)NNC(=O)c1ccc(O)cc1O
270861	1	CCN1/C(=C\c2ccc3ccccc3[n+]2CC)Sc2cc(C)ccc21.[I-]
272334	0	CCN1/C(=C/c2ccc3cc(C)ccc3[n+]2CC)Sc2cc(C)ccc21.[I-]
274159	1	CC[n+]1c(/C=C/c2ccc(N(C)C)cc2)ccc2ccccc21.[I-]
275684	0	COc1ccc2cc3c(N)nn(C(=O)Cc4c[nH]c5ccccc45)c3nc2c1
275781	1	CCCCOc1ccc(Br)cc1CSC(=N)N.Cl
276294	1	CCCC(=O)NC(c1ccccc1Cl)c1ccc2cccnc2c1O
277067	0	CCCC(=O)NC(c1ccc(C)cc1)c1ccc2cccnc2c1O
277475	0	O=[N+]([O-])c1ccc(O)c(/C=N/Nc2nc3ccccc3[nH]2)c1
279596	0	CN(C)c1ccc(/C=C/c2ccc3c4ccccc4ccc3[n+]2-c2ccccc2)cc1.[Cl-]
279924	0	CCC(C)C(NC(=O)CCCNC(=O)CCC(=O)OC1O[C@H]2OC3(C)CC[C@H]4[C@H](C)CCC(C1C)C24OO3)C(=O)O
280101	1	O=C(CSCC(=O)Nc1ccccc1)N/N=C/c1c(O)ccc2ccccc12
280522	1	Cc1ccc(C(=O)N/N=C/c2c(O)ccc3ccccc23)cn1
280899	1	CC(=O)O.CCC1(O)C(=O)OCc2c1cc1n(c2=O)Cc2cc3cc(O)ccc3nc2-1
282415	1	C=CCn1c(C)cc(C(=O)CN2C(=O)c3ccccc3S2(=O)=O)c1C
283138	1	O=C(OCCC12CC3CC(CC(C3)C1)C2)c1ccc(NCc2cc(O)ccc2O)cc1
284638	0	CC(C)(C)C(=O)/C(=C\c1cccc([N+](=O)[O-])c1)n1cncn1
284708	1	CCN(CC)c1ccc(C(NC(=O)C(C)C)c2ccc3cccnc3c2O)cc1
284995	1	CC[n+]1c(-c2ccccc2)c2cc(N)ccc2c2ccc(N)cc21.[Br-]
285026	1	CCC(C)NC(=O)CCC(=O)OC1O[C@H]2OC3(C)CC[C@H]4[C@H](C)CCC(C1C)C24OO3
285027	1	O=C(CN1C(=O)c2ccccc2S1(=O)=O)c1ccc2c(c1)OCCO2
285249	1	C[n+]1c(-c2ccccc2)cc2c(=Cc3ccccc3)c3ccccc3n21.O=S(=O)([O-])C(F)(F)F
285758	0	COC(=O)c1cn(NC(=O)c2cc([N+](=O)[O-])ccc2F)c(=O)c2ccccc12
285812	0	Cc1cc2[nH]c3c(c[n+](C)c4ccccc34)c2cc1C.[I-]
286034	0	Cc1ccc(-n2c(-c3cccs3)c[n+]3c2CCc2ccccc2-3)cc1C.[Br-]
286326	1	CCOC(=O)[C@]12Cc3ccc(C)cc3[C@H]1N(C1CCCCC1)C(=O)c1ccccc12
286354	1	CCN(CC)c1ccc(/C=C/c2ccc3ccc(OC)cc3[n+]2CC)cc1.[I-]
286440	1	CN(C)c1ccc(/C=C/c2cc[n+](C)c3ccccc23)cc1.[I-]
286483	0	CCCCCOc1ccc(Br)cc1CSC(=N)N.Cl
288047	0	CC1C(OC(=O)CCC(=O)NC(C)(C)CO)O[C@H]2OC3(C)CC[C@H]4[C@H](C)CCC1C24OO3
288101	1	COc1ccccc1-n1c(-c2ccccc2)c[n+]2c1CCc1ccccc1-2.[Br-]
288282	0	CC(=O)NC(c1cccc([N+](=O)[O-])c1)c1ccc2cccnc2c1O
288336	1	CC(=NNC(=S)Nc1ccccc1Cl)c1ccccn1
288760	1	COc1ccc(C(NC(=O)C(C)C)c2ccc3cccnc3c2O)cc1
289159	1	O=C(NCCOc1cccnc1)c1ccc(OC2CCN(Cc3ccccn3)CC2)cc1
291128	0	c1ccc2c(c1)C1=NCCN1c1ccccc1-2
291920	0	Nc1c2ccccc2[nH+]c2ccccc12.[Cl-]
292444	0	Cc1nc2c(=O)n(C)c(=O)nc-2n(C)n1
294349	0	COCC(=O)OC1CCn2c1nc1c2C(=O)C(C)=C(NC(C)=O)C1=O
295538	1	Cl.N=c1c2c(n(Cc3ccc(Cl)c(Cl)c3)c3c1CCC3)CCCC2
296527	1	CCC1C/C(=C\c2cccnc2)C(=O)/C(=C/c2cccnc2)C1
297252	0	CC[n+]1ccc(/C=C2\C=Cc3ccccc3N2C)c2ccc(C)cc21
297268	0	Cl.O[C@H]1C=C2CCN3Cc4cc5c(cc4[C@@H](C23)[C@@H]1O)OCO5
299645	1	CCC(NC(=O)Nc1nnc(C(F)(F)F)s1)(C(F)(F)F)C(F)(F)F
300567	1	CCOC(=O)c1cc2c(=Cc3ccc(N(C)C)cc3)c3ccccc3n2[n+]1C.O=S(=O)([O-])C(F)(F)F
302560	0	O=C(NC(Nc1nc2ccc([N+](=O)[O-])cc2s1)(C(F)(F)F)C(F)(F)F)c1ccccc1Cl
303610	1	O=C(CN1C(=O)c2ccccc2S1(=O)=O)c1ccc2c(c1)OCCCO2
308437	1	CCOc1ccc(-n2c(-c3ccc(OC)cc3)c[n+]3c2CCCCC3)cc1.[Br-]
309417	0	COc1cccc(N2CCN(c3ncnc4c3cnn4-c3ccc(C)cc3C)CC2)c1
310860	1	COc1ccc(C(=O)Nc2nc3ccccc3s2)c(OC)c1
310867	0	CC(C)c1ccc(-n2c(-c3ccccc3)c[n+]3c2CCc2ccccc2-3)cc1.[Br-]
310900	1	C[n+]1c2n(c3ccccc31)N=C(c1cc(C(C)(C)C)c(O)c(C(C)(C)C)c1)CS2.[Br-]
313562	1	CCOc1ccc(-c2cc(C)[n+](CCN(CC)CC)c(-c3ccc(OCC)cc3)c2)cc1.[O-][Cl+3]([O-])([O-])[O-]
313582	0	COc1ccccc1-[n+]1c(C)cc(/C=C2\Sc3ccccc3N2C)cc1C.[I-]
313619	1	N#Cc1cn(C2OC(CO)C(O)C2O)c2ncnc(N)c12
314146	0	CC[n+]1ccc(/C=C/c2ccc(N(C)C)cc2)c2ccccc21.[I-]
315391	0	CN(Cc1ccccc1)C1=CC(=[N+]2CCCCC2)CC(C)(C)C1.[I-]
316507	0	CC[C@@H](C(=O)[C@@H](C)[C@@H](O)[C@H](C)[C@@H]1O[C@@H]([C@@H](CC)C(=O)[O-])CC[C@@H]1C)[C@H]1O[C@]2(C=C[C@@H](O)[C@]3(CC[C@@](C)([C@H]4CC[C@](O)(CC)[C@H](C)O4)O3)O2)[C@H](C)C[C@@H]1C.O.[Na+]
321946	1	Nc1cccc2nc3ccccc3cc12
324294	0	COc1ccccc1C(=O)Nc1nc(-c2ccc(S(=O)(=O)N3CCOCC3)cc2)cs1
325517	1	C[n+]1c2cc(N)ccc2cc2ccc(N)cc21.[Cl-]
327044	1	CC(=O)C1=C(c2ccc(Br)cc2)C(=O)c2ccccc2C1=O
327045	1	CN(C)c1ccc(-[n+]2c(-c3ccccc3)cc(-c3ccccc3)cc2-c2ccccc2)cc1.[O-][Cl+3]([O-])([O-])[O-]
327404	0	CC(=O)OC1CC2(O)C3CCC4CC(O)CCC4(C)C3CCC2(C)C1C1=CC(=O)OC1
327536	1	CCOC(=O)[C@]12Cc3ccc(C)cc3[C@H]1N(C1CCCCC1)C(=O)c1cc(OC)ccc12
328145	1	NC(=S)NN=C1c2cc(OCCN3CCOCC3)ccc2-c2ccc(OCCN3CCOCC3)cc21
328772	1	CN(C)c1ccc(C=c2c3ccccc3n3c2c2ccccc2[n+]3C)cc1.O=S(=O)([O-])C(F)(F)F
328774	1	CC1CC(C)C(=O)C(C(CC2CC(=O)NC(=O)C2)OC(=O)CC(=O)c2ccccc2)C1
328780	1	Cc1ccc(-n2c(-c3ccccc3)c[n+]3c2CCc2ccccc2-3)c(C)c1.[Br-]
328867	1	CC1C/C(=C\c2cccnc2)C(=O)/C(=C/c2cccnc2)C1
328919	0	C=C1C(=O)OC2CC(C)C3C=CC(=O)C3(C)C(O)C12
330034	1	CC1CC(C)C[N+](=C2C=C(N3CCCC3)CC(C)(C)C2)C1.[I-]
330408	0	COC1C(O)C(C)OC(OC2CCC3(C)C(CCC4C3C(O)CC3(C)C(C5=CC(=O)OC5)CCC43O)C2)C1O
330810	0	Br.N=c1c2c(n(Cc3ccc(Br)cc3)c3c1CCC3)CCCC2
330973	1	COC1CC2C=C(C)C=CC=CC(=O)NC(c3ccccc3)CC=CCCC(O)CC(=O)C2=C1O
331783	1	CC[C@@H](O)C[C@H]1CCC[C@@]2(C[C@@H]3OC(=O)/C=C/[C@@](C)(O)[C@@H](O)[C@H](C)[C@@H](O)[C@H](OC4CCC(N(C)C)C(C)O4)[C@@H](O)[C@](C)(O)CCCCC/C=C/[C@@H]4CC(C)(C)O[C@@]4(O)C[C@H](O2)[C@H]3C)O1
332456	0	O=C(N/N=C/c1ccc[nH]1)c1ccc(COc2cccc3cccnc23)cc1
332580	0	Br.CCN(CC)CC(C)(C)C(=O)/C=C/c1ccc(/C=C/C(=O)C(C)(C)CN(CC)CC)cc1
332902	1	CC(C)(O)C#Cc1ccc([C@@H]2C[C@H]3CN(c4ccccc4)C(=O)[C@]34CCCN24)s1
333459	1	O=C(NC(Nc1nc2ccc([N+](=O)[O-])cc2s1)(C(F)(F)F)C(F)(F)F)c1cccnc1
334136	0	Cc1nn(C(C)(C)C)c(C)c1/C=N/OC(=O)Nc1ccc(Cl)cc1
334142	1	O=S(=O)(c1ccc(NC(=S)NCc2cccnc2)cc1)N1CCCCC1
334409	0	O=C(CC(O)(C(F)(F)F)C(F)(F)F)Nc1ccc(Cl)c(Cl)c1
334410	1	CCOC(=O)[C@]12Cc3cc(C)ccc3[C@H]1N(C1CCCCC1)C(=O)c1ccccc12
334421	0	CC(C)(C)c1cc(C=C(C#N)C#N)cc(C(C)(C)C)c1O
334858	1	O=c1ccc2ccccc2c2ccccc12
335091	1	CCN1/C(=C/C(C)=C/c2sc3ccccc3[n+]2CC)Sc2ccccc21
335352	0	NCCCNc1nc(N)c([N+](=O)[O-])c(NC2CCCCC2)n1
336482	1	O=C(O)C(F)(F)F.Oc1cccc2cc(Nc3ccccc3)cnc12
337396	1	COC(=O)c1ccccc1-c1c2ccc(=[NH2+])cc-2oc2cc(N)ccc12.O.[Cl-]
337601	1	O=C(Sc1cccc2cccnc12)c1ccccc1Br
341279	1	Cc1cc([N+](=O)[O-])nn1Cc1ccc(C(=O)N/N=C/c2ccc(O)cc2O)cc1
341543	1	CCOC(=O)[C@]12Cc3cc(C)ccc3[C@H]1N(C1CCCCC1)C(=O)c1cc(OC)ccc12
342555	0	CN(C)c1ncnc2c1nnn2C1OC(CO)C(O)C1O
344245	0	N#CC(c1cccc(Cl)c1)c1ccc2c(C(F)(F)F)cc(C(F)(F)F)nc2n1
345104	1	Cc1cc2sc3ccc(C#CC4(O)CCCCC4)cc3c(=O)c2cc1C
345657	0	CC12CCC(O)CC1CCC1C2CCC2(C)C(C3=CC(=O)OC3)CCC12O
346831	0	CN(Cc1ccccc1)C1=CC(=[N+]2CCCC2)CC(C)(C)C1.[I-]
352429	0	CN=c1scc(-c2cccs2)n1/N=C/c1ccccc1O
352938	1	CC1=C(O)C(=O)C=C2C1=CC=C1C2(C)CCC2(C)C3CC(C)(C(=O)O)CCC3(C)CCC12C
354677	1	COc1ccc(NC(=O)/C(Cl)=C(/Cl)S(=O)Cc2ccc(Cl)cc2)cn1
355710	0	[O-][Cl+3]([O-])([O-])[O-].c1ccc(-c2cc(-c3ccccc3)[n+](-c3ccccc3)c(-c3ccccc3)c2)cc1
358150	1	CCN1/C(=C/C(C)=C/c2sc3ccccc3[n+]2CC)Sc2ccccc21.[I-]
367095	1	CC(=O)OC1CC(OC2C(O)CC(OC3C(O)CC(OC4CCC5(C)C(CCC6C5CC(O)C5(C)C(C7=CC(=O)OC7)CCC65O)C4)OC3C)OC2C)OC(C)C1OC1OC(CO)C(O)C(O)C1O
367851	1	CCOC(=O)[C@]12Cc3c(cc(OC)c(OC)c3OC)[C@H]1N(C1CCCCC1)C(=O)c1ccccc12
368337	1	CCN1/C(=C/c2ccc3ccccc3[n+]2CC)C=Cc2ccccc21.[Cl-]
370667	0	CNC1=C(N(C(C)=O)c2ccc(Br)cc2)C(=O)c2ccccc2C1=O
371509	1	CCN1/C(=C/c2sc(-c3ccccc3C)c[n+]2C)Sc2ccccc21.[I-]
371711	0	CC12CCC3C(CCC4(O)CC(O)CCC34C=NO)C1(O)CCC2C1=COC(=O)C1
373978	1	CCCC(=O)NC(c1ccc(N(C)C)cc1)c1ccc2cccnc2c1O
374010	1	CC(C)(C)c1ccc(-c2cn(-c3ccc(Br)cc3)c3[n+]2CCCS3)cc1.[Br-]
378526	0	CC(C)(C)NCC(=Cc1ccccc1)C(=O)c1ccccc1
379559	1	Cc1cc(C)c2c(N)c3cccc(C)c3nc2n1
379871	0	Cc1cc(/C=C2\Sc3ccccc3N2C)cc(C)[n+]1CC1CCCO1.F[B-](F)(F)F
380564	0	Cc1oc(-c2ccc(Cl)cc2)nc1CSCC(=O)NC1CCN(Cc2ccccc2)CC1
381388	0	NC1=NC[C@H](Cc2ccc(O)cc2)N1CCCCC1CCCCC1
381393	0	CCCCN(c1ccccc1)c1ncnc(N)c1[N+](=O)[O-]
381395	0	CCCCc1ccc(N/C(N)=N/c2nc(C)cc(C)n2)cc1
381571	1	COc1cc(OC)cc(-c2cc3nc(C)c(CCC(=O)NCc4ccccc4)c(C)n3n2)c1
381594	0	Cc1c(CCC(=O)N[C@@H](CCCNC(N)=O)C(=O)O)c(=O)oc2cc3oc4c(c3cc12)CCCC4
384456	0	O=C(CCCN1C(=O)/C(=C/c2ccccc2Cl)SC1=S)NNC(=O)c1ccccc1
384849	0	O=[N+]([O-])c1ccc2nc(CNc3nc(N4CCOCC4)nc4c3ncn4-c3ccsc3)[nH]c2c1
386018	1	CC1(C)N=C(N)N=C(N)N1c1ccc(CCCCc2ccccc2)cc1.CCS(=O)(=O)O
386511	1	CC1=CC(=O)C(C(C)C)=C/C1=N\OS(=O)(=O)c1ccc(F)cc1
386513	1	O=C(Cc1coc2cc3c(cc12)CCC3)OCC(=O)N1CCCC1=O
386514	1	Cc1nc(N)nc(N)c1/C=C/C(C)(C)c1ccc(Cl)cc1.Cl
386517	1	CC(=O)Oc1c(Cl)cc(N(C(C)=O)S(=O)(=O)c2ccccc2)c2ccccc12
386521	1	COc1ccc(C(C(=O)NC2CCCC2)n2c(CSCCOc3ccccc3)nc3ccccc32)cc1
386817	1	CN(C)c1ccc(/C=C/c2cc[n+](C)c3ccccc23)cc1.[O-][Cl+3]([O-])([O-])[O-]
387042	1	CC1=C(C(=O)OCc2ccc3c(c2)OCO3)C(c2ccc(Cl)cc2)NC(=O)N1
387183	1	FC(F)(F)c1ccc2nc(CNc3nc(N4CCOCC4)nc4c3ncn4-c3ccsc3)[nH]c2c1
389166	1	C=C1C(=O)OC2CC1C(OC(C)=O)CC(C)=CCCC(C)=CCCC2(C)O
391131	1	Cc1ccc(C(=O)N/N=C\c2ccc([N+](=O)[O-])s2)cn1
392613	1	CC(C)c1ccc(/C=C(\c2nc3ccccc3[nH]2)S(=O)(=O)c2ccccc2)cc1
392739	1	COc1cc(/C=C/C(=O)c2ccc3c(c2)OCCO3)cc(Br)c1OCC(=O)N(C)C
392754	1	CC1CCc2nc(NC(=O)CSc3nc4ccccc4o3)sc2C1
392756	1	COC(=O)C1=C(C(=O)OC)[C@@]2([C@@H](Cc3ccc(C)cc3)Nc3ccccc3)C=C[C@@H]1O2
392762	1	Cn1nc(-c2ccccn2)nc2c(=O)n(C)c(=O)nc1-2
392789	1	COCc1ccc(C(=O)N2CCC(CCC(=O)Nc3cccc(C)c3)CC2)s1
394347	1	COc1cccc(NC(=O)CSc2nnc(-c3cc(C)n(-c4ccccc4)c3C)o2)c1
395171	0	COc1ccc(-n2c(C)c([N+](=O)[O-])c3ccc(O)c(CN(C)C)c32)cc1
395175	1	COc1ccc(/C=C2/SC(=O)N(CCCCCC(=O)Nc3ccccc3C(=O)O)C2=S)cc1
395179	1	CC(C)(C)c1ccc(Oc2ccc(NC(=O)c3ccco3)cn2)cc1
395181	1	C[C@]12CC[C@H](O)C[C@H]1CC[C@@H]1[C@@H]2C[C@@H](O)[C@]2(C)[C@@H](C3=CC(=O)OC3)CC[C@]12O
398175	1	O=C(Nc1ccc(OC(=O)N2CCCCC2)cc1)N1CCOCC1
400634	0	CCOc1ccccc1-n1c([S-])c(C(=O)Nc2ccc(C)cc2)[n+]2ccccc12
402074	1	Cl.NCCN1C(=O)S/C(=C\c2ccc3c(c2)OCO3)C1=O
403758	1	CCN1CCN(/C=N/c2nc3c(s2)CCCC3)CC1
404404	1	CC(O)C1C=CC=CC(=O)OC2CC3OC4C5OC5(C)C(O)CC4(COC(=O)C(O)C(C)CCO1)C2(C)C31CO1
404406	1	Cc1ccc(-c2nnc(SCC(=O)Nc3ccccc3F)o2)cc1
404470	1	Cc1ccc(C(C)C)c(OCc2ccc(C(=O)N/N=C/c3ccc(C(=O)O)cc3)cc2)c1
404472	1	CC[C@@H]1C[C@H]2CC[C@H](O2)[C@H](C)C(=O)O[C@@H](C)C[C@@H]2CC[C@@H](O2)[C@@H](C)C(=O)O[C@H](C)C[C@H]2CC[C@H](O2)[C@H](C)C(=O)O[C@@H](C)C[C@@H]2CC[C@@H](O2)[C@@H](C)C(=O)O1
405724	0	Cc1ccc(C(=O)Nc2cnc3ccccc3c2)cc1
406008	1	C=Cc1cc(OC)c2c(c1)c(=O)oc1c2cc(OC)c2c(O)ccc(C3OC(C)C(O)C(C)(O)C3O)c21
406009	1	N#Cc1cc2cc3c(cc2nc1SCC(=O)N1CCOCC1)OCCO3
406563	1	CC12CCC3C(CCC4(O)CC(O)CCC34C=O)C1(O)CCC2C1=CC(=O)OC1
407401	1	COc1cc(/C=N/NC(N)=S)cc(Br)c1OCc1ccccc1F
407582	1	CCN1C/C(=C/c2ccc(N3CCOCC3)cc2)C(=O)/C(=C/c2ccc(N3CCOCC3)cc2)C1
407583	1	CC(=O)N(/N=C1\Sc2ccccc2C1=O)c1ccc(C)cc1C
417287	1	COC(=O)c1c(-c2ccc(N(C)C)cc2)sc2ccc(OC)cc12
420759	1	Cc1cc(C)n(-c2ccc(C(=O)Nc3ccc(S(=O)(=O)NCc4ccco4)cc3)cc2)n1
421494	1	C#CCN(C[C@@H]1[C@@H](OC(=O)Nc2cccs2)[C@@H](OC(=O)Nc2cccs2)Cn2c(=O)ccc(=O)n21)S(=O)(=O)c1ccc(C)cc1
425430	0	CCOC(=O)c1[nH]c2ccc(F)cc2c1N=NN1CCSCC1
427839	1	O=[N+]([O-])c1cccc2[nH]c(CNc3nc(N4CCOCC4)nc4c3ncn4-c3ccsc3)nc12
429444	1	COc1cccc(-c2nnc3n2N=C(C(C)(C)C)CS3)c1
429575	1	Cc1cc(C(C)(C)C)cc(C)c1C[n+]1ccc2ccccc2c1.[Cl-]
429598	1	Cc1ccc(C(=O)Nc2sc(C)c(-c3ccccc3)c2C(N)=O)cc1[N+](=O)[O-]
429599	1	CCOc1ccc(/C=C2\SC(=S)N(CCCC(=O)NCCCN3CCOCC3)C2=O)cc1
429643	1	COc1ccc(CN2Cc3cnnn3-c3ccccc3C2C#N)cc1
430232	1	COC(=O)c1ccc2nc(Nc3nc4c(F)cc(F)cc4s3)sc2c1
430455	0	CCN1CCN(c2cc(C)c3cc(NC(=S)N4CCCC(C)C4)ccc3n2)CC1
430508	1	CC(C)(C)c1ccc(-c2noc(CCC(=O)NCC3CCCO3)n2)cc1
430588	0	CC(C)(C)c1ccc(-c2noc(CCC(=O)NCc3ccco3)n2)cc1
431377	1	COc1cc(C=C2CCCC(=Cc3ccc(OCC4CO4)c(OC)c3)C2=O)ccc1OCC1CO1
432465	1	O=C(/C=C\Nc1ccc2c(c1)OCO2)c1ccccn1
432873	1	Cc1c(/C(O)=C2/C(=O)C(=O)N(CCN3CCOCC3)C2c2ccccn2)cnn1-c1ccccc1
432905	1	CCN1C=CC(=C2C(=O)c3ccccc3C2=O)C=C1
433332	1	COc1ccc(-c2noc(CCCC(=O)Nc3ccc(C(N)=O)cc3)n2)cc1
433350	1	CCn1c(C)cc(C(=O)CN2C(=O)c3ccccc3S2(=O)=O)c1C
433448	1	O=C(Nc1ccc(Cl)cc1)/C(=C/c1cccc(O)c1)c1nc2ccccc2s1
434381	1	COc1ccc2c(c1)c(=Cc1ccc(N(C)C)cc1)c1cc(-c3ccccc3)[n+](C)n12.O=S(=O)([O-])C(F)(F)F
434610	1	Cc1ccc(/C=C2\SC(=S)N(CCCC(=O)Nc3ccccn3)C2=O)cc1
442142	1	O=C1C(=C(c2ccccc2)N2CCOCC2)Cc2ccccc21
457901	1	CN(C)c1ccc(CCc2ccc(N)cc2)cc1
458006	1	COc1ccc(NC(=O)c2cc([N+](=O)[O-])ccc2O)cc1
458388	0	O=C(CCCN1C(=O)/C(=C/c2ccccc2Cl)SC1=S)NNC(=O)c1ccc(Cl)cc1Cl
460747	1	O=S(=O)(C/C(=C/CO)S(=O)(=O)c1ccccc1)c1ccccc1
463108	1	O=C(CCN1CCOCC1)c1ccc(N2CCCCC2)cc1.[Br-]
478574	1	COc1ccc(NC(=O)/C(Cl)=C(/Cl)S(=O)(=O)Cc2ccccc2)cn1
487737	1	CCOc1ccc(-c2cc(CCCC(=O)Nc3cc(OC)ccc3OC)no2)cc1
494023	1	C(=N/Nc1ccc2ccccc2n1)\c1ccc2c(c1)OCCO2
496641	1	C[C@@H]1C[C@H]2O[C@@H]2/C=C\C=C\C(=O)Cc2cc(O)cc(O)c2C(=O)O1
511504	0	CC(C)N1C/C(=C/c2ccsc2)C(=O)/C(=C/c2ccsc2)C1
529495	1	COc1cccc2c1C(=O)c1c(O)c3c(c(O)c1C2=O)CC(O)(C(C)=NNC(=O)c1ccc(Cl)c(Cl)c1)CC3OC1CC(N)C(O)C(C)O1
537520	0	Cc1cc(/C=N/n2cnnc2)c(C)n1-c1ccc(OCc2ccc(Cl)cc2)cc1
555237	0	Cl.NCCCCCc1nnc(SCc2ccccc2Cl)o1
568416	0	CCCS(=O)(=O)c1cnc(C2COc3ccccc3O2)nc1N
570321	0	COC(=O)c1ccc(NC(=O)c2nc(S(=O)(=O)Cc3cccc(C)c3)ncc2Cl)cc1
570353	1	CCOC(=O)Cc1ccc(NC(=O)c2ccc(C(C)(C)C)cc2)cc1
573993	1	O=C(O)c1ccccc1C(=O)Nc1ccc(Oc2cccc3ccccc23)cc1
575908	0	O=C(NC1CCCC1)C(c1ccccc1)n1c(CSCCOc2ccccc2)nc2ccccc21
587874	0	C=C1CCC2C(C)(C)CCC[C@]2(C)[C@H]1CC1=C(O)C(=O)C(CO)=CC1=O
590845	0	Cc1ccc(C#N)c(SCc2nnc(-c3ccc(Cl)cc3)o2)n1
594152	1	C#CCN(C[C@@H]1[C@@H](OC(=O)NCC2CCCCC2)[C@@H](OC(=O)NCC2CCCCC2)Cn2c(=O)ccc(=O)n21)S(=O)(=O)c1ccc(C)cc1
600291	0	O=C(N/N=C/c1ccc([N+](=O)[O-])o1)c1ccc2c(c1)OCO2
604599	1	O=C(NCc1cccnc1)/C(=C/c1ccc(-c2ccc(Cl)cc2)o1)S(=O)(=O)c1ccccc1
605816	0	O=C(NCc1cccnc1)/C(=C\c1ccc(-c2ccc(Br)cc2)o1)S(=O)(=O)c1ccccc1
608806	0	Cc1cc(/C=N/Nc2ncnc(N)c2[N+](=O)[O-])c(C)n1-c1ccccc1
608933	1	COc1ccc(/C=C2/SC(=S)N(CCCC(=O)Nc3ccccc3C(=O)O)C2=O)cc1
609289	0	COc1ccc(/C=C2\SC(=S)N(CCCC(=O)N3CCCCC3CCO)C2=O)cc1
609340	1	Nc1ccc(-c2cc3ccccc3c(=O)o2)cc1
609635	1	O=C(/C=C/c1cccnc1)/C=C/c1cccnc1
610612	1	C[C@]12CCC3C(CCC4=CC(O)CC[C@@]43/C=N/O)C1(O)CCC2C1=CC(=O)OC1
612005	0	O=C(N/N=C/c1ccc([N+](=O)[O-])s1)c1ccccc1
616271	0	CCOc1ccc(-c2cc(CCCC(=O)NCc3ccc(C)cc3)no2)cc1
616433	0	CC(=NNc1ccc2ccccc2n1)c1ccccn1
616573	1	Cc1cc(C(=O)CSc2nc3ccccc3[nH]2)c(C)n1CC1CCCO1
619061	1	O=C(Nc1nc2ccccc2[nH]1)c1ccccc1F
622563	0	Cc1c(CCC(=O)N[C@@H](C)C(=O)O)c(=O)oc2cc3oc4c(c3cc12)CCCC4
623589	0	Cc1nc2c(-c3ccc(F)cc3)cnn2c(N)c1-c1ccccc1
629413	1	CCCc1nc2c(=O)n(C)c(=O)nc-2n(C)n1
630400	1	C=C1C(=O)O[C@H]2C[C@H]1[C@@H](OC(C)=O)C/C(C)=C/CC/C(C)=C\CC[C@]2(C)O
634713	0	COc1ccc(/C=C2\CC/C(=C\c3ccc(OC)c(OC)c3)C2=O)cc1OC
644215	1	O=C(O)CCCc1nc(-c2ccc(Cl)cc2)no1
644416	0	Cc1ccc(C(=O)NNC(=O)CCCN2C(=O)/C(=C/c3ccccc3Cl)SC2=S)cc1
644417	0	COc1cccc(/C=C2\SC(=S)N(CCCC(=O)N3CCCCC3CCO)C2=O)c1
644590	0	Cc1ccc(-c2cc3onc(-c4ccccc4)c3c(=O)n2C)cc1
644796	1	Cl.O=C1/C(=C/c2ccccc2)CN(C(=O)CCN2CCOCC2)C/C1=C\c1ccccc1
644956	1	O=C(O)c1cccc(CSc2nnc(COc3ccccc3)o2)c1
645037	0	COCCn1c(C)cc(C(=O)CSc2nnnn2C2CCCC2)c1C
645189	0	CC(=O)OC1CCC2(C)C(CCC3C4CC=C(C(C)=O)C4(C)OC(=O)CC32)C1
645210	1	Cc1csc(SCC(=O)c2cc(C)n(Cc3cccs3)c2C)n1
645259	0	Cc1c(CCC(=O)N2CCC(C(=O)O)(c3ccccc3)CC2)c(=O)oc2cc3oc4c(c3cc12)CCCC4
645578	0	Cc1ccc(-c2cc3c(N=O)c4ccccc4c-3n[nH]2)cc1
645961	0	O=C(O)c1cccc(CSc2nnc(-c3ccc(Cl)cc3)o2)c1
646118	1	O=C(NCCc1ccccc1)c1ccc2c(c1)OCCO2
646268	0	CCOC(=O)c1c(C)nn(-c2ccc(NC(=O)/C=C/C(=O)O)cc2)c1C
646318	0	Nc1ccc(OC(=O)Nc2ccc(O)cc2)cc1
646426	0	COc1cccc2c1C(=O)c1c(O)c3c(c(O)c1C2=O)C[C@](O)(C(C)=O)C[C@H]3O[C@@H]1C[C@@H](N)[C@@H](O)[C@@H](C)O1.Cl
646459	0	COCCn1c(C)cc(C2=NNC(=Nc3ccccc3F)SC2)c1C
646626	0	Cc1c(CCC(=O)NCCCC(=O)O)c(=O)oc2cc3oc4c(c3cc12)CCCC4
646706	0	Cc1cc(C)c2c(N)c(C(=O)Nc3ncc(C)s3)sc2n1
647111	0	CC(=O)Nc1ccc(SCC(=O)c2cc(C)n(-c3ccccc3F)c2C)cc1
647155	0	COC1=CC(=O)c2nc(Cl)ccc2C1=O
647227	0	Cn1c(=O)cc(OCCCC(=O)Nc2cc(-c3cn[nH]c3)ccn2)c2ccccc21
647356	0	CCCCCCCn1ccc(=N)cc1.I
647427	1	CCOc1ccccc1-n1c(SCC(=O)Nc2ccccc2C(=O)O)nc2ccccc2c1=O
647479	0	COc1ccc2cc3c(N)nn(C(=O)c4ccccc4[N+](=O)[O-])c3nc2c1
647549	0	CCOC(=O)Cc1nn(Cc2nc(-c3ccc(C#N)cc3)cs2)c(=O)c2ccccc12
647652	0	O=C(Nc1ccc(F)cc1)Nc1cc(OCC(F)(F)F)cc(OCC(F)(F)F)c1
647662	0	C/C(CC(C)(C)C1CCCCC1)=N\NC(N)=S
647700	1	O=C1C=CC2C3C(=O)N(c4ccccc4)C(=O)C3C1N2Cc1ccccc1
647709	0	C=C1CC2(OC1=O)c1ccccc1CCc1ccccc12
647727	0	CN1/C(=C\C(=O)C[n+]2ccc3ccccc3c2)C(C)(C)c2ccccc21.[Cl-]
647748	0	CC(C)(C)c1ccc(OCCC(=O)OCC(=O)NC2CC2)cc1
648347	0	O=C(O)c1ccc(N/N=C/c2ccc3nccnc3c2)cc1
648405	1	COc1ccc(Cl)cc1NS(=O)(=O)c1cccc(C(=O)NC2CCN(Cc3ccccc3)CC2)c1
648591	0	N#Cc1c(NC(=O)CCCC(=O)O)sc2c1CCCCC2
648601	1	C=CS(=O)(=O)N(Cc1ccc(F)cc1)C(=C)C(=O)OC
648610	0	COc1ccc(CC(=O)Nc2cccc(SC)c2)cc1OC
648690	0	S=C(NCc1ccc(Cl)cc1)Nc1ccncc1
648776	0	CCOc1ccc(-c2nc(CSCC(=O)N3CCN(c4cccc(OC)c4)CC3)c(C)o2)cc1
648809	0	CC(=O)N1CCCC(c2cc(C(=O)Nc3ccccc3)no2)C1
649030	0	COc1cccc(CNc2nc3cc(-c4cnn(Cc5ccccc5)c4)sc3c(=O)n2C)c1
649031	1	Cn1c(=O)cc(OCCCC(=O)Nc2cc(-c3ccncc3)ccn2)c2ccccc21
649098	0	O=C(c1ccc(S(=O)(=O)c2ccc(F)cc2)c([N+](=O)[O-])c1)N1CCCCCC1
649227	0	Cc1cc(C)nc(/N=C(\N)Nc2ccc(OCCC(C)C)cc2)n1
649706	1	CC(=O)c1cn(CCOc2cc(C)ccc2C)c2ccccc12
649767	0	COc1cc(NC(=O)c2cccs2)c(C(=O)OCC(=O)c2cc(C)n(-c3ccccc3)c2C)cc1OC
649840	0	CC1CCc2nc(NC(=O)C3COc4ccccc4O3)sc2C1
649849	1	C1COCCO1.O=C(Nc1nc(-c2ccc(S(=O)(=O)N3CCOCC3)cc2)cs1)c1ccccc1
649940	0	Brc1ccc2ncnc(NCc3ccccc3)c2c1
650128	0	C[C@H]1CCC/C=C/[C@@H]2C[C@H](O)C[C@H]2[C@@H](O)/C=C/C(=O)O1
650445	0	CC1CC(C)(C)Nc2ccc(OC(=O)c3ccco3)cc21
650651	0	CC1(C)C=Cc2ccc(O)c(C(=O)/C=C/c3ccccc3)c2O1
650901	0	COc1ccc(OC)c(CCNC(=O)C(C)n2nc(C)c3c(C)n(-c4ccc(C)cc4)nc3c2=O)c1
650963	0	Cc1cc(C)nc(SCC(=O)Nc2ccc(N3CCOCC3)c(Cl)c2)n1
650985	1	Cc1cc(C)cc(C(=O)NC(=S)Nc2ccc(-c3cc4ccccc4oc3=O)cc2)c1
651019	0	O=C(Nc1ccc(S(=O)(=O)N2CCCCC2)cc1)c1ccc(CN2CCc3ccccc3C2)cc1
651074	0	FC(F)(F)c1cnc(NNC(=S)Nc2ccccc2Cl)c(Cl)c1
651192	1	CC(=O)Nc1ccc(NC2=C/C(=N/S(=O)(=O)c3cccs3)c3ccccc3C2=O)cc1
651196	0	C=CCSc1nc2ccccc2n1C(=O)/C=C/c1cc(OC)c(OC)c(OC)c1
651433	1	CNC(=O)c1cc(Oc2ccc(NC(=O)Nc3ccc(Cl)c(C(F)(F)F)c3)cc2)ccn1.Cc1ccc(S(=O)(=O)O)cc1
651526	0	COc1ccccc1NS(=O)(=O)c1cc(NC(=O)c2ccc(Cl)nc2)ccc1Cl
651552	1	CCCCCCCCCCCCCCCC[n+]1cccc2ccccc21.[I-]
651572	0	CC(C)(C)c1ccc(Oc2ccc(NC(=O)C3CC=CCC3C(=O)O)cc2)cc1
651883	1	c1ccc(CCNc2ccnc3cc4ccccc4cc23)cc1
652021	0	O=S(=O)(c1cc(C(F)(F)F)ccc1Cl)N1CCN(c2ncnc3ccccc23)CC1
652457	0	CC(=O)c1c(C)n(C2CCCCC2)c2ccc(O)cc12
652603	0	Cc1ccc(C)c(N2CCN(C(=O)CCCCCn3c(=S)[nH]c4ccc(N5CCOCC5)cc4c3=O)CC2)c1
652610	1	O=c1[nH]c2ccccc2n1C1CCN(C(c2ccccc2OC(F)(F)F)c2nnnn2Cc2ccccc2)CC1
652627	1	Cc1[nH]nc2ncc(C(=O)c3ccccc3O)cc12
652633	0	CN(CCOc1ccc(Cl)cc1)C(=O)c1cccc(S(=O)(=O)N2CCN(Cc3ccccc3)CC2)c1
653794	0	Cc1ccc(S(=O)(=O)NCc2ccncc2)cc1C
654026	0	CCCCCCC[N+](CC)(CC)CCCCc1ccc(Cl)cc1.Cc1ccc(S(=O)(=O)[O-])cc1
654035	0	Cc1cc(-c2ccccc2)cc(-c2ccccc2)[n+]1CCc1ccccc1.[O-][Cl+3]([O-])([O-])[O-]
654198	0	Cc1cc(C(=O)COC(=O)C2=COCCO2)c(C)n1-c1ccccc1
654714	0	COc1ccc(-c2cc(-c3ccccc3)[n+](C)c(-c3ccccc3)c2)cc1.[O-][Cl+3]([O-])([O-])[O-]
654799	0	CC1CCCC=CC2CC(OC(=O)CN(C)C)CC2C(O)C=CC(=O)O1
654842	1	CCn1nc(C)c(CNC(=O)c2ccc(OC3CCN(Cc4ccccn4)CC3)cc2)c1C
654928	0	CCOC(=O)CC1CCCCN1C(=O)c1cc(COc2cccc3cnccc23)on1
655326	0	C(C#CCCCCCCCCC[n+]1ccccc1)#CCCCCCCCCC[n+]1ccccc1
655401	0	CC1Sc2ccc(S(=O)(=O)N3CCC(C(=O)Nc4ccc(Cl)cc4)CC3)cc2NC1=O
655414	0	CCCCC[n+]1cccc2c3ccccc3ccc21.[I-]
655586	1	Nc1cc(=O)[nH]c(SCc2ccc(Cl)cc2Cl)n1
655948	1	c1ccc(-c2csc3ncnc(NCC4COc5ccccc5O4)c23)cc1
656184	0	CCc1ccc(Nc2n[n+](-c3ccccc3)c(-c3c(Cl)cccc3Cl)s2)cc1.[Cl-]
657154	1	Cn1c(=O)cc(OCCCC(=O)Nc2cc(C(F)(F)F)ccn2)c2ccccc21
657457	1	CC1(C)N=C(N)N=C(N)N1c1ccc(Oc2ccc(Cl)cc2)c(Cl)c1.Cl
657698	0	Cc1ccc(-c2noc(CCCC(=O)NC3CCCC3)n2)cc1
657705	1	Cc1ccc(-c2csc(=Nc3cccnc3)n2CCCn2ccnc2)cc1C
657882	1	CCc1ccn2cc(-c3cc(-c4ccccc4)no3)nc2c1
658308	1	COc1ccc(-n2c(-c3ccc(Cl)cc3)c[n+]3c2CCc2ccccc2-3)cc1.[Br-]
658548	1	CC1=CC2C(C(O)CC3(C)C2CC(C)C32OCOC23COCO3)C2(C)C/C(=C\O)C(=O)C=C12
658691	0	NC(=O)c1cccc(-c2noc(-c3ccccc3F)n2)c1
658703	0	[2H]C(CCOS(N)(=O)=O)c1ccc(C(C)(C)C)cc1
658734	1	COc1ccc(-c2noc(CCCCC(=O)N3CCN(c4cc(C)ccc4C)CC3)n2)cc1
658914	1	C[N+](C)(C)CCC(=O)N1C/C(=C/c2ccccc2)C(=O)/C(=C\c2ccccc2)C1.[Br-]
658994	0	O=C1CCCCC1Sc1nnc(-c2ccc3c(c2)OCO3)o1
659111	0	COC(=O)c1ccc(-c2nc3cc(N)ccc3o2)cc1
659124	0	O=C(c1ccc(S(=O)(=O)c2cccc(Cl)c2)c([N+](=O)[O-])c1)N1CCN(c2ccccn2)CC1
659128	0	CCN=C1NN=C(c2cc(C)n(Cc3ccco3)c2C)CS1
659229	0	Cc1c(CCC(=O)N[C@@H](CC(C)C)C(=O)O)c(=O)oc2cc3oc4c(c3cc12)CCCC4
659230	0	CCOC(=O)[C@]12Cc3cc(Cl)ccc3[C@H]1N(C(C)C)C(=O)c1ccccc12
659352	0	O=C1C=C(c2c(O)ccc3ccccc23)c2ccccc2C1=O
659424	1	COc1ccc(-n2c(-c3ccc(Br)cc3)c[n+]3c2CCc2ccccc2-3)cc1.[Br-]
659453	0	Cc1sc2cc3c(c(C(=O)c4ccccc4)[n+]2c1C)-c1cccc2cccc-3c12.[Br-]
659499	0	CCC(CO)[n+]1c(C)cc(/C=C2\Sc3ccccc3N2Cc2ccccc2)cc1C.[Br-]
659505	0	C#CCN(C[C@@H]1[C@@H](OC(=O)NCc2ccccc2F)[C@@H](OC(=O)NCc2ccccc2F)Cn2c(=O)ccc(=O)n21)S(=O)(=O)c1ccc(C)cc1
659619	0	Cc1ccc(/C=C2\SC(=S)N(CCCC(=O)NNC(=O)c3ccccc3O)C2=O)cc1
659639	0	COc1ccc2cc3c(N)nn(C(=O)c4ccccc4Cl)c3nc2c1
659661	1	CCN1/C(=C/c2ccc3cc(C)cc(C)c3[n+]2CC)Sc2cc(C)ccc21.[I-]
659735	1	CC(=O)Nc1ccc(SCC(=O)c2cc(C)n(-c3ccccc3)c2C)cc1
659822	1	CCOc1ccc(-c2cc(CCCC(=O)NCCCOC)no2)cc1
659882	0	Cc1nc(SCc2cccc(C(=O)O)c2)nc2c1CCCC2
659917	1	CC1CCOC(=O)C=CC=CC(=O)OC2CC3OC4C5OC5(C)C(O)CC4(COC(=O)C1O)C2(C)C31CO1
659940	1	CC[C@@H](C)[C@H](NC(=O)CCc1c(C)c2cc3c4c(oc3c(C)c2oc1=O)CCCC4)C(=O)O
659975	0	Cc1cc(C(F)(F)F)c(C#N)c(SCC(=O)Nc2nc3ccccc3s2)n1
659991	1	CCN1/C(=C/c2ccc3cccc(C)c3[n+]2CC)Sc2ccccc21.[I-]
660194	1	COc1ccc(-[n+]2c(-c3ccccc3)cc(-c3ccccc3)cc2-c2ccccc2)cc1.[O-][Cl+3]([O-])([O-])[O-]
660202	1	COc1cccc(N2CCN(c3ncnc4c3[nH]c3ccccc34)CC2C)c1
660617	0	Cc1ccc(C(C)C)c(OCc2ccc(C(=O)N/N=C/c3ccc(O)c(O)c3)cc2)c1
660762	0	Cl.Nc1nonc1C(=O)NCCNCc1cc(Br)ccc1OCc1ccccc1F
660926	0	O=S(=O)(c1cc(F)ccc1F)N1CCN(c2ncnc3ccccc23)CC1
661004	1	Cc1ccc(Oc2ccc(OCC(=O)Nc3ccncc3)cc2)cc1
661005	0	CC(C)Nc1ncnc2ccc(Br)cc12
661007	0	CC1Cc2ccccc2N1c1ncnc(N)c1[N+](=O)[O-]
661039	0	O=C(c1ccc2c3c(cccc13)CC2)C1CCCN(Cc2ccncc2)C1
661336	0	O=C1C(N2CCOCC2)=C(n2nnc3ccccc32)C(=O)c2ccccc21
661482	0	COc1ccccc1NC(=S)N/N=C\c1c[nH]c2ccc(S(=O)(=O)N3CCCCC3)cc12
661484	0	O=C(NC1=NCCS1)C1COc2ccccc2O1
661535	1	Clc1ccc2nc(CNc3nc(N4CCOCC4)nc4c3ncn4-c3ccsc3)[nH]c2c1
661682	0	NC(=O)c1sc2nc3c(c(-c4ccccc4)c2c1N)CCC3
661707	0	Cc1cc(C)cc(Oc2ccc(N)cc2)c1
661767	0	Fc1ccc(NC(=S)NNc2ncc(C(F)(F)F)cc2Cl)c(F)c1
661791	0	C[C@@H]1O[C@@H](O[C@H]2C[C@@H](O)[C@]3(CO)[C@H]4[C@H](O)C[C@]5(C)[C@@H](C6COC(=O)C6)CC[C@]5(O)[C@@H]4CC[C@]3(O)C2)[C@H](O)[C@H](O)[C@H]1O
661798	0	CCCCCc1ccc(OCCCC[n+]2ccc(C)cc2)c(CCCCC)c1.[Cl-]
661897	0	O=C(NCc1cccnc1)/C(=C\c1ccc(-c2cccc(Cl)c2)o1)S(=O)(=O)c1ccccc1
661985	0	c1ccc2[nH]c(CNc3nc(N4CCOCC4)nc4c3ncn4-c3ccsc3)nc2c1
662097	0	COC(=O)C1=C(c2ccc(-c3ccccc3)c(F)c2)C[C@@H]2CC[C@H]1N2C(=O)N1CCCCC1
662159	0	Cc1ccc(C)c(S(=O)(=O)N2CCN(c3ncnc4sccc34)CC2)c1
662164	0	Cc1ccc(-c2cn3cc(C)ccc3n2)cc1
662193	1	O=C1CC(c2ccc3c(c2)OCCO3)Oc2ccc([N+](=O)[O-])cc21
662276	0	CC1CCN(c2ccc(-c3cccs3)nn2)CC1
662339	1	Cc1ccc(C(=O)O/N=C(\N)c2ccccn2)c(Cl)c1
662520	1	C[n+]1c2n(c3ccccc31)N=C(c1ccc(Br)cc1)CS2.[Br-]
662540	0	CCC(=O)Nc1cccc(C(=O)/C=C/c2cc(Br)ccc2OC)c1
662672	0	O=C(C(=Cc1ccccc1)CN1CCCCC1)c1ccccc1
662684	0	COc1cc(SC)ccc1C(=O)Nc1nc(C)cs1
662755	1	CC(C)c1ccc(-c2nc3ccccc3s2)cc1
662766	0	COc1ccc(CCNc2c(C)c(C)nc3ncnn23)cc1
662767	0	NC(=O)[C@H]1CC2(CC(c3cccc(NC(=O)COc4ccc(Cl)cc4)c3)=NO2)CN1C(=O)Cc1ccc([N+](=O)[O-])cc1
662835	0	Cc1ccc(C(=O)N/N=C/c2ccc([N+](=O)[O-])s2)cc1
662867	0	COc1ccc(OC)c(CCNC(=O)Cn2nc(C)c3c(C)n(-c4ccc(C)cc4)nc3c2=O)c1
662875	1	COc1ccc(NC(=O)c2cc(-c3cc(F)ccc3OC)n[nH]2)cc1OC
662965	0	CC(=O)N1c2ccc(S(=O)(=O)N3CCC(C(=O)Nc4cccc(C)n4)CC3)cc2CC1C
663146	1	CCOc1ccc(S(=O)(=O)NCc2ccncc2)cc1
663159	0	CC(=O)c1c(C)[nH]c(C(=O)OCC(=O)Nc2cccc(S(=O)(=O)N3CCCC3)c2)c1C
663168	1	Cn1c(CCN2CCN(c3ccccn3)CC2)nc2cc(NC(=O)COc3ccc(Cl)cc3)ccc21
663191	1	CC(=NNC(=S)Nc1ccc(C)cc1)c1ccccn1
663228	0	O=C(NC1CCCCCCC1)c1cc(COc2ccc3ncccc3c2)on1
663338	0	CN(C)CCOc1ccc2c(c1)C(=O)C(=Cc1ncc([N+](=O)[O-])n1C)C2.O=S(=O)(O)O
663373	1	Fc1ccc(NC(=S)N2CCCN(c3ccc(C(F)(F)F)cn3)CC2)c(F)c1
663609	0	COc1ccc(NS(=O)(=O)c2ccc(-c3coc(C)n3)cc2)cc1OC
663611	0	CC1(C)CC(N2CCCC2)=CC(=[N+]2CCCC2)C1.[I-]
663688	0	CCCn1c(C)cc(C(=O)CN2C(=O)c3ccccc3S2(=O)=O)c1C
663701	0	CC1(C)CC(N2CCCC2)=CC(=[N+]2CCCCC2)C1.[I-]
663857	0	CC(=NNC(=S)N1CCCCC1)c1ccccn1
663916	0	O=C(Nc1ccccc1)Nc1cc(OCC(F)(F)F)cc(OCC(F)(F)F)c1
664030	0	COc1ccc(-c2oc3ccc(N4CCOCC4)cc3c2C#CCO)cc1
664044	1	CCOc1cccc(/C=N/NC(=S)Nc2ccccc2[N+](=O)[O-])c1O
664077	0	Cc1ccc(OCCN2CCN(c3ncnc4sc(C)c(C)c34)CC2)cc1
664386	0	Cc1sc(NC(=O)c2ccco2)c(C(c2cccnc2)N2CCN(c3ccc(F)cc3)CC2)c1C
664633	0	Cc1ccc(S(=O)(=O)N2CCc3ccccc3CC2)cc1
664676	0	CC(Nc1ncnc2ccccc12)c1ccccc1
664713	0	CC(C)c1oc(=O)cc2c1[C@@H](O)[C@H]1OC(=O)[C@@]3(C)CC[C@@H](O)[C@@]2(C)C13
664728	0	CC1(c2ccc3ccccc3c2)NC(=O)N(CC(=O)N2CCN(Cc3ccc(C#N)cc3)CC2)C1=O
664797	0	Cc1ccc(S(=O)(=O)NCc2ccncc2)c(C)c1C
664890	0	S=C1Cc2ccccc2N1
664895	0	CCCCCCCCCCCCCCCC[n+]1ccccc1.O.[Cl-]
665013	1	CN(CCOc1ccc(Cl)cc1)C(=O)c1cccc(S(=O)(=O)N2CCN(c3ccc(F)cc3)CC2)c1
665015	0	CCOC(=O)C1=Nc2ccccc2C1=[N+]=[N-]
665044	0	O=C(Nc1sc2c(c1C(=O)O)CCCCC2)c1ccccc1
665128	0	Cc1ccc(Oc2ccc(C(=O)NCc3ccncc3)cc2)cc1
665160	0	CN(C)c1ccc2nc3ccc(=[N+](C)C)cc-3sc2c1.[Cl-]
665250	0	Cc1nn(C)c(C)c1CN(Cc1nc(CCC(C)C)no1)C(C)C
665421	0	O=C(Nc1nonc1NC(=O)c1cccs1)c1cccs1
665525	0	Cc1nc2ccc(NS(=O)(=O)c3ccc4c(c3)OCCO4)cc2s1
665571	0	CC(C)(C)c1ccc(C(=O)O/N=C(\N)c2ccccc2)cc1
665597	1	COc1ccc(NC(=O)COc2ccc(N(C)S(=O)(=O)c3ccc(Cl)cc3)cc2)cc1OC
665706	0	N#Cc1c(Br)n(C2OC(CO)C(O)C2O)c2ncnc(N)c12
665723	0	COc1ccc(CC(=O)Nc2cccc(S(=O)(=O)N3CCCCCC3)c2)cc1OC
665749	0	O=C(c1ccc2c3c(cccc13)C(=O)N(c1cccc(C(F)(F)F)c1)C2=O)N1CCN(Cc2ccccc2)CC1
665851	1	CCN(CC)S(=O)(=O)c1cc(NC(=O)CNc2cccc(S(=O)(=O)N3CCCC3)c2)ccc1C
665901	1	CCCCCCCCCCCCCCCC[n+]1ccccc1.O.[Br-]
665994	0	c1csc(CCNc2ncnc3sc4c(c23)CCC4)c1
666066	0	CC1(c2ccc3ccccc3c2)NC(=O)N(CC(=O)N2CCN(Cc3ccccc3)CC2)C1=O
666227	0	COc1ccc(NC(=O)C2Cc3c(-c4cccc(C(C)=O)c4)ccnc3O2)cc1OC
666253	0	Cc1ccc(S(=O)(=O)NCc2ccncc2)cc1
666580	0	Cc1cc(C(=O)COC(=O)c2ccccc2Br)c(C)n1CC1CCCO1
666638	0	O=C1c2ccccc2-n2c1nc1ccccc1c2=O
666815	0	O=C(Cc1ccc(Cl)cc1Cl)Nc1ccncc1
666941	1	[Cl-].c1ccc(-c2nn(-c3ccccc3)[n+](-c3ccccc3)n2)cc1
667208	0	Cc1ccc(NC(=O)C2=C(c3ccccc3)S(=O)(=O)CCS2(=O)=O)cc1
667213	0	CN(C)CCNc1ccc(CO)c2oc3ccc(O)cc3c(=O)c12
667316	1	CCc1ccc(-n2cc(-c3ccc(F)cc3)[n+]3c2SCCC3)cc1.[Br-]
667359	0	COc1ccccc1NS(=O)(=O)c1cccc(C(=O)NC2CCN(Cc3ccccc3)CC2)c1
667720	1	C/C(=N\NC(N)=S)C12CC3CC(CC(C3)C1)C2
669032	0	COc1ccc2c(c1)[nH]c1c(N3CCN(Cc4ccc5c(c4)OCO5)CC3)ncnc12
669092	0	C=C1C(=O)[C@]23C[C@H]1CCC2[C@@]1(C)C(C[C@@H]3O)[C@](C)(C(=O)OC)CC[C@@H]1O
669136	0	CCNc1nc(NC(C)(C)C)nc(SC(C(C)=O)C(C)=O)n1
675357	1	CCN(CC)S(=O)(=O)c1cccc(NC(=O)CNc2cccc(S(=O)(=O)N3CCCC3)c2)c1
675358	1	CCOC(=O)C1CCCN(S(=O)(=O)c2ccc(S(=O)(=O)N(CC)CC)cc2)C1
676047	1	COc1ccc2c(/C=C/c3cc[n+](C)cc3)c[nH]c2c1.[I-]
676301	1	CCCCNc1cc(C)nc(NCc2ccccc2)n1
679583	0	COC(=O)Cc1ccc(NC(=O)c2ccc(C(C)(C)C)cc2)cc1
683816	0	Cc1ccc(S(=O)(=O)CC2CSc3nc4ccccc4n32)cc1
684128	1	c1cnc2c(c1)ccc1cccnc12
684139	0	Cn1nc(C(C)(C)C)cc1C(=O)NCc1ccc2c(c1)OCO2
684194	0	Cc1nnsc1C(=O)NC1CCCc2c1cnn2-c1ccc(C(C)(C)C)cc1
684232	0	O=NN(CCc1ccncc1)c1ccc(OCc2ccccc2)cc1
685180	0	CCOC(=O)c1c2c(n(-c3ccc(OC)cc3)c1C)C(=O)C(=O)c1ccccc1-2
685884	0	Cc1cc(N2CCN(c3nc4ccccc4s3)CC2)n2ncnc2n1
687016	0	CC(=O)c1c(C)[nH]c(C(=O)COc2cc(C)ccc2C(C)C)c1C
687245	1	CC(C)(C)C(=O)Nc1cc2nn(-c3ccccc3)nc2cc1Cl
687246	1	Cc1sc2ncnc(NCCc3ccc(S(N)(=O)=O)cc3)c2c1C
691624	0	Cc1cccc(-n2ncc3c2CCCC3NC(=O)C2(C(N)=O)CC2)c1C
693427	0	CCCc1cc(=O)n2nc(N3CCC(C(=O)N4CCN(c5ccc(OC)cc5)CC4)CC3)sc2n1
693933	0	NC(Cc1ccc(F)cc1)c1csc(Nc2ncccn2)n1
693996	0	CCOc1ccccc1C(=O)Nc1cc2c(cc1N1CCCC1)n(CC)c(=O)n2CC
694001	0	Cc1cccc(/C=C(\c2nc3ccccc3[nH]2)S(=O)(=O)c2ccccc2)c1
694255	0	O=C(Nc1ccc(Oc2ccccc2)cc1)c1csc([C@H]2C[C@H](O)[C@@H](CO)O2)n1
695356	0	CCN1/C(=C/c2ccc3cc(C)ccc3[n+]2CC)Sc2ccccc21.[I-]
695453	1	CC(C)(C)c1ccc(CSc2cnn(C(C)(C)C)c(=O)c2Cl)cc1
696849	0	COc1ccc(/C=C2\SC(=O)N(CCCC(=O)Nc3ccc(C(=O)O)cc3)C2=O)cc1
697226	0	Cc1cc(C)c(CN2CCN(C(=O)Cn3cnc4c(NCc5ccccc5)ncnc43)CC2)c(C)c1
697235	0	COc1ccc(CCNc2ncnc3sc(C)cc23)cc1OC.Cl
698490	1	O=C(N/N=C/c1ccc(O)cc1)c1ccc(COc2cc(Cl)ccc2Cl)o1
699126	0	COc1ccc(-c2coc3c(C(=O)NCc4ccc(OC)c(OC)c4)cccc23)c(C)c1
699555	0	CC1(C)CC2CC(C)(CN2S(=O)(=O)c2ccc(C(=O)Nc3ccc(S(=O)(=O)N4CCOCC4)cc3)cc2)C1
699688	0	COc1ccc(NC(=O)c2cc(-c3cc(Cl)ccc3OC)n[nH]2)cc1OC
700080	0	Cc1cc(C)nc(NC(=O)c2ccc(COc3ccccc3Cl)cc2)c1
701172	0	CC(Nc1ncnc2sccc12)c1ccccc1
701191	1	c1ccc2c(c1)CCN(c1ncnc3c1[nH]c1ccccc13)C2
701960	0	O=C(Nc1ccc(S(=O)(=O)Nc2ccccc2)cc1)c1ccc(CN2CCOCC2)cc1
702723	1	CC(=O)N1CCN(c2ccc(Oc3ccc([N+](=O)[O-])c(C(F)(F)F)c3)cc2)CC1
702724	0	COc1cc2c(cc1OC)[C@@H]1C(=O)c3ccc4c(c3O[C@@H]1CO2)C[C@H](C(C)C)O4
703074	0	O=C(CN1C(=O)c2ccccc2S1(=O)=O)c1ccc(Cl)cc1Cl
703759	1	Cc1sc2ncnc(NCC3COc4ccccc4O3)c2c1C
704682	0	CCOc1ccc(Nc2cc(C)nc(-n3nc(C)cc3C)n2)cc1
705653	0	COc1ccc(OC)c(NC(=O)c2nnn(Cc3ccccc3C)c2N)c1
706653	0	Cn1nccc1C(=O)NC1CCCc2c1cnn2-c1ccc(F)cc1F
707701	0	Cn1nccc1C(=O)NC1CCCc2c1cnn2-c1ccc(C(C)(C)C)cc1
707760	0	CC(C)(C)c1ccc(-c2noc(CCC(N)=O)n2)cc1
708625	1	CCN(CC)S(=O)(=O)c1ccc(NC(=O)c2ccc(CN3CCOCC3)cc2)cc1
709430	0	O=C(Cn1cc(COc2ccc(C(=O)c3ccccc3)cc2)nn1)c1ccc(O)cc1
709498	1	COc1ccc(C)cc1NC(=O)c1nnn(Cc2cccc(C(F)(F)F)c2)c1N
710585	0	OCC1OC(n2ccc3c2ncn2ncnc32)C(O)C1O
710705	1	Cc1cccn2c(=O)c3cc(C(=O)NCCN4CCOCC4)c(=N)n(Cc4ccc(F)cc4)c3nc12
711025	1	CC(C)(C)c1ccc(Oc2ccc(N)cc2)cc1
712247	0	CC[C@@H](C(=O)[C@@H](C)[C@@H](O)[C@H](C)CCc1ccc(C)c(O)c1C(=O)[O-])[C@H]1O[C@](CC)([C@H]2CC[C@](O)(CC)[C@H](C)O2)C[C@@H]1C.[Na+]
713065	0	CN(CCc1ccccc1)C(=O)c1ccc(NC(=O)Cc2ccc(NC(=O)C3CCCN(C(=O)CCc4ccccc4)C3)cc2)cc1
713129	0	C#CC[N+](C)(C)CCCCCCCCCCCC.[Br-]
714273	0	CC(=O)OC(C)(C)/C=C/C(=O)C(C)(O)C1C(O)CC2(C)C3CC=C4C(CC(O)C(=O)C4(C)C)C3(C)C(=O)CC12C
716169	0	CC(=O)Oc1ccc(-c2ccc(C(=O)Nc3cccc(S(=O)(=O)N4CCOCC4)c3)cc2)cc1
717087	0	O=C(N/N=C(\c1ccccc1)c1cccnc1)c1cccc(F)c1
719338	0	NC(=Nc1nc(-c2ccccn2)cc2ccccc12)c1ccccn1
720633	1	Cc1nn(-c2nc3ccccc3[nH]2)c(=O)c2ccccc12
720645	1	Cc1cc(C(=O)NC2CCCc3c2cnn3-c2cccc(C)c2C)n(C)n1
720655	1	O=C(CSc1nnnn1C1CC2CCC1C2)Nc1ccnc2ccccc12
720660	1	CC(C)CCOc1cccc(OCC(=O)Nc2ccncc2)c1
720985	0	Cc1ccccc1C(=O)O/N=C/c1c(N2CCOCC2)n(C)c2ccccc12
721008	0	Cc1nn(-c2ccccc2Cl)c(Cl)c1/C=N/Nc1nc2ccccc2s1
723867	0	Nc1nc(N)nc(-c2cc(O)ccc2O)n1
724449	0	CCn1cc(/C=C/c2cc[n+](C)cc2)c2ccccc21.[I-]
726983	0	Cc1cc(C)cc(NS(=O)(=O)c2ccc3c(c2)c(=O)n(C)c(=O)n3C)c1
727588	1	NS(=O)(=O)c1ccc(Sc2nc3ccccc3s2)c([N+](=O)[O-])c1
727593	1	COc1ccc(CCNc2ncnc3c2oc2ccccc23)cc1OC.Cl
727658	1	CCOc1cc(S(=O)(=O)NCc2ccncc2)ccc1Cl
728950	1	O=C(CSc1nnc(-c2cccnc2)s1)Nc1ccnc2ccccc12
728962	1	Oc1[nH]c2ccc(Br)cc2c1N=NC(=S)N1CCOCC1
729793	0	CC(=O)c1cn(Cc2ccccc2C#N)c2ccccc12
729936	0	Cc1cc(C(=O)Nc2ccc(Cl)cc2)c(C)n1-c1ccccc1
731146	1	COc1ccc(NS(=O)(=O)c2cccc(NC(=O)c3ccc(Cl)nc3)c2)cc1
735851	0	Oc1[nH]c2ccccc2c1N=NC(=S)N1CCOCC1
736186	0	CN(C)c1ccc(/C=C/C=C/c2sc3ccccc3[n+]2C)cc1.[O-][Cl+3]([O-])([O-])[O-]
736314	0	CN(C)CCNC(=O)c1cccc2nc3cccc(F)c3nc12.Cl
736966	0	C=CCNC(=S)N/N=C(\C)c1ccccn1
737669	0	O=C(Nc1ccc(CSc2ccccc2)cc1)c1ccc(CN2CCOCC2)cc1
738018	0	COc1ccc(/C=N/OCC(=O)NC(c2ccccc2)c2ccccc2)cc1OC
738092	0	CCOC(=O)c1c2c(n(Cc3ccccc3)c1C)C(=O)C(=O)c1ccccc1-2
738196	0	CC(=O)c1c(C)[nH]c(C(=O)OCC(=O)Nc2ccc(Cl)cc2[N+](=O)[O-])c1C
742151	1	COc1ccc(C)cc1NS(=O)(=O)c1ccc(-c2cnc(C3CC3)o2)cc1
742527	0	COc1cc2c(c(OC)c1OC)-c1ccc(SC)c(=O)cc1C(NC=O)CC2
742820	1	Cc1ccc(NCCN(C)C)c2c(=O)c3cc(O)ccc3sc12
743472	0	c1ccc2cc3c(NCCN4CCOCC4)ccnc3cc2c1
743662	0	CN(Cc1ccccc1)C(=O)c1ccc(NC(=O)Cc2ccc(NC(=O)C3CCCN(C(=O)CCc4ccccc4)C3)cc2)cc1
744674	0	Nc1nc2ccccc2cc1C(=O)NCc1ccc(-c2ccccc2)cc1
744850	0	O=C(Nc1cccc(S(=O)(=O)Nc2ccc(Cl)cc2)c1)c1ccc(Cl)nc1
745583	0	O=C(CSc1nnc(Cn2nnc3ccccc32)o1)N(Cc1ccc(F)cc1)c1ccccc1
746058	0	O=C(N/N=C\c1ccc([N+](=O)[O-])s1)c1cncc(Br)c1
746082	0	COc1ccc(-c2c[n+](CC(=O)OC3CC(C)CCC3C(C)C)c3n2CCC3)cc1.[Cl-]
746405	0	O=S(=O)(NCC1CCCO1)c1ccc(-c2ccc(S(=O)(=O)NCC3CCCO3)cc2)cc1
746614	0	COc1ccc2cc3cc(C(=O)Nc4cc(OC)c(OC)c(OC)c4)oc3nc2c1
747204	1	CC(C)(C)c1ccc(C(=O)N2CCCCCC2=O)cc1
750059	1	Clc1cccc(CNc2ccn3nc(-c4ccc(OCc5ccccc5)cc4)cc3n2)c1
752487	0	C=C1C(=O)C2=CC1CCC(=O)C1(C)CCC(OC(C)=O)C(C)(C)C1CC2O
752492	0	Cc1ccc(-c2cn(-c3ccccc3)c3[n+]2CCCS3)cc1.[Br-]
752713	0	Cc1cc(O)c(/C=N/Nc2cccc(Cl)c2)c(=O)o1
753262	1	Cc1ccc(Nc2nc(N)nc(CCl)n2)c(C)c1
753633	0	OC[C@@H]1CN(Cc2ccc(-c3ccccc3)cc2)C[C@H](n2cnc3c(NC4CCC4)ncnc32)O1
753815	0	CC1(C)CC2CC(C)(CN2S(=O)(=O)c2ccc(C(=O)Nc3cccc(S(=O)(=O)N4CCOCC4)c3)cc2)C1
755449	1	Cc1nnsc1C(=O)NC1CCCc2c1cnn2-c1ccc(F)cc1F
755590	0	Cc1c(C(C)C)c(=O)n(-c2ccc(S(=O)(=O)NC3CCCCC3)cc2)n1C
756730	1	Cc1ccc(-c2csc(NC(=O)C3CCN(S(=O)(=O)c4cccs4)CC3)n2)cc1
757048	0	COCC1CCCN(C(=O)c2cc(COc3ccc4ncccc4c3)on2)C1
759147	0	Cc1cc(-n2c(C)cc(C(=O)CSc3ncnc4ccccc34)c2C)no1
759153	1	CS(=O)(=O)N1CCCC(c2nc(-c3ccc(S(=O)(=O)NCc4ccccc4)cc3)no2)C1
761637	0	CC(C)(C)c1ccc(C(=O)Nc2ccc(CC(=O)O)cc2)o1
761925	0	C1=C(CCNc2ncnc3c2[nH]c2ccccc23)CCCC1
762484	0	Cc1ccc2ccc3cccnc3c2n1
762594	0	CCCCNC(=O)COC(=O)c1c2c(nc3ccccc13)/C(=C/c1cccs1)CC2
763882	1	CN(C(=O)COc1ccccc1C(=O)NCCOc1ccccc1)c1ccccc1
764325	0	CCOC(=O)c1sc(N(Cc2ccccc2)C(=O)COC(=O)c2ccc(O)cc2)nc1C
764647	0	Cc1nc(CNS(=O)(=O)c2ccc(Oc3ccccc3)cc2)cs1
765802	0	CS(=O)(=O)N(CC(=O)N1CCN(Cc2ccc3c(c2)OCO3)CC1)Cc1ccc(Cl)cc1
765832	0	O=C(CN1C(=O)C(c2ccc(F)cc2)=NC12CCCC2)Nc1ccc(F)cc1
765926	0	CCOC(=O)C(=CNc1ccc(NC2=NCC(C)S2)cc1)C(=O)OCC
766646	0	CC(C)(C)C(=O)Nc1ccc(NC(=O)c2ccco2)nc1
766823	0	CSc1ccc(COC(=O)c2cc([N+](=O)[O-])ccc2N2CCOCC2)cc1
768965	0	COc1ccc(CNC(=O)c2cccc3c(-c4cnn(C)c4)coc23)cc1OC
769515	0	Cc1cccc(OCC(=O)Nc2ccncc2)c1C
771515	0	CC(=O)O[C@H]1C(=O)[C@@]2(C)C([C@H](OC(=O)c3ccccc3)[C@]3(O)C[C@H](OC(=O)[C@H](O)[C@@H](NC(=O)Cc4ccccc4)c4ccccc4)C(C)=C1C3(C)C)[C@]1(OC(C)=O)CO[C@@H]1C[C@@H]2O
771884	0	O=C(/C=C/Nc1ccccc1Br)c1ccccn1
773338	0	COc1cc(C)c(Br)cc1S(=O)(=O)NCc1ccncc1
774017	0	Cc1cccc2cc(C#N)c(SCC(=O)N3CC(=O)Nc4ccccc43)nc12
774024	0	Cc1nc2ccc(NC(=O)c3cc(S(=O)(=O)N(C)c4ccccc4)ccc3Cl)cc2s1
774798	1	CCOc1ccc2c(c1)sc(N)[n+]2Cc1cc(C)cc2cccnc12.[Br-]
775984	0	Cc1ccsc1C(=O)OCC(=O)c1cc(C)n(CC2CCCO2)c1C
776240	1	O=c1[nH]c2ccccc2n1C1CCN(C(c2ccccc2OC(F)(F)F)c2nnnn2-c2ccc3c(c2)OCCO3)CC1
776890	0	Cc1cc(C)c(S(=O)(=O)/N=C2/C=C(Sc3ncn[nH]3)C(=O)c3ccccc32)cc1C
778068	1	Cc1cc(NCCCCCCCNc2cc(C)nc3cc([N+](=O)[O-])ccc23)c2ccc([N+](=O)[O-])cc2n1
779251	0	Nc1ccc(Oc2ccccc2-c2ccccc2)cc1
779411	0	CC(=O)Nc1ccccc1OCC(=O)c1cc(C)n(Cc2cccs2)c1C
780996	1	CN1CCN(c2nc(-c3ccccc3O)nc3ccccc23)CC1
781247	1	Cc1cc(/C=C2\SC(=S)N(C)C2=O)c(C)n1-c1ccc(O)cc1
781738	0	S=C(Nc1ccccc1)Nc1ccc(OCc2ccc(Cl)cc2Cl)cc1
784757	0	Cc1ccc(S(=O)(=O)/C(=C/Cl)NC(=O)c2ccccc2)cc1
786590	0	COc1ccccc1N1CCN(C(=O)C2c3ccccc3Oc3ccccc32)CC1
786617	1	CCc1cc(-c2nnn(CCC3COCCO3)c2CC)ccc1-c1cn(Cc2ccc3ccccc3c2)nn1
786787	0	COc1ccc(Nc2ccncc2[N+](=O)[O-])cc1
787494	1	c1ccc(-c2nc(N3CCCCCC3)c3ccccc3n2)nc1
788928	1	NCC(=O)Nc1ccc(Cl)cc1C(=O)c1ccc[nH]1
789893	1	Nc1ccc(S(=O)(=O)NNC(=O)C(=O)NNc2ccccc2)cc1
789961	0	CCCCCCCCCCOC(=O)Cn1c(COc2ccccc2C)[n+](C)c2ccccc21.[Cl-]
790478	0	CC[C@H](CO)Nc1nc(Nc2cccc(Cl)c2)c2ncn(C(C)C)c2n1
790561	1	CCNc1nc(-c2sc(NC(=O)C(C)(C)C)nc2C)c(-n2cc(-c3ccccc3)nn2)s1
792334	1	CC1(C)N=C(N)N=C(N)N1CCCCc1ccccc1
792581	1	N#Cc1cccc(C=C(C(=O)c2ccccc2)c2ccccc2)c1
792632	1	O=C(N/N=C/c1ccc([N+](=O)[O-])o1)c1ccc(O)cc1
793640	0	Cc1cccc(NC(=O)c2cc(Cl)ccc2[N+](=O)[O-])c1
793761	1	CCOc1ccc(Br)cc1/C(C)=N\NC1=NCCN1.Cl
793991	1	COc1ccc(/C=N/NC(=O)c2[nH]c3ccc(Br)cc3c2-c2ccccc2)cc1
794433	1	Cc1ccc2nc(NC(=O)CSCC(=O)OCC(=O)c3ccccc3)sc2c1
794476	0	COC1/C=C/C=C(\C)Cc2cc(O)c(Cl)c(c2)N(C)C(=O)CC(OC(=O)C(C)C)C2(C)OC2C(C)C2CC1(O)NC(=O)O2
795858	0	O=C(Nc1ccc(N2CCN(Cc3ccccc3F)CC2)cc1)c1ccc([N+](=O)[O-])o1
796436	0	CCOC(=O)c1cc(C#N)c(N2CCN(C(=O)c3cccc(C(F)(F)F)c3)CC2)nc1C(F)(F)F
796599	0	O=C(COc1ccc(Cl)cc1Cl)Nc1ccccn1
796774	0	CCCCCc1c(CC)ncn1CCc1ccccc1OC.O=C(O)C(F)(F)F
797821	1	COc1ccc(CNC(=O)c2sc(=O)n(Cc3ccc(-c4ccccc4)cc3)c2C)cc1OC
798232	0	COc1ccc(NS(=O)(=O)c2ccc(-c3cnc(C4CC4)o3)cc2)cc1OC
799289	0	COc1ccccc1-c1nnc2sc(-c3ccc(N(C)C)cc3)nn12
799368	0	c1ccc(-c2ccc(-c3nc(-c4ccccn4)no3)cc2)cc1
800766	0	COc1ccc(Nc2ncnc3ccc(Br)cc23)c(OC)c1
801101	0	O=C(Nc1nccs1)c1ccc(S(=O)(=O)NCC2CCCCC2)cc1
801271	0	O=C(N/N=C/c1c[nH]c2ccccc12)c1[nH]c2ccc(Br)cc2c1-c1ccccc1
802584	0	OC[C@@H]1CN(Cc2ccc(-c3ccccc3)cc2)C[C@H](n2cnc3c(NCc4ccco4)ncnc32)O1
803313	0	COc1ccc(-n2nnnc2C(CCc2ccccc2)N2CCC(n3c(=O)[nH]c4ccccc43)CC2)cc1
803320	0	CCCOc1ccc(Cc2c(Cl)nc(SC)nc2NC)cc1
803928	0	COc1ccc(NS(=O)(=O)c2ccc3c(c2)OCCO3)cc1OC
804274	0	Cc1ccc(NC(=O)CSc2ccc3c(c2)OCCO3)c(O)c1
804682	0	Br.O=S(=O)(c1ccc(-c2csc(Nc3ccc(F)cc3)n2)cc1)N1CCCC1
805251	0	COc1ccc(-n2nnnc2C(c2cc3ccccc3o2)N2CCC(n3c(=O)[nH]c4ccccc43)CC2)cc1
805690	0	COc1ccc(NC(=O)Cn2c(C)cc(=O)c3ccccc32)cc1
807208	0	CNc1ncnc(Sc2nc(N)nc3nc[nH]c23)c1[N+](=O)[O-]
807557	0	CC(=O)CSc1nc(N)c(C#N)c(-c2cccs2)c1C#N
808844	0	COc1cc2c(OC(C)=O)c3c(c(-c4ccc5c(c4)OCO5)c2cc1OC)C(=O)OC3
814443	0	COc1ccc(-c2noc(CCCC(=O)NC3CCCC3)n2)cc1
817553	1	Cc1cc(C)c(SCCc2ccncc2)c(C)c1
818737	0	COc1ccccc1-n1nnnc1S(=O)(=O)Cc1ccc(Cl)cc1
818740	0	Nc1ccc(-c2cc3ccccc3oc2=O)cc1
822180	1	O=C(Nc1ccc2c(c1)CCCN2C(=O)c1ccco1)c1cc([N+](=O)[O-])ccc1Cl
822429	0	O=[N+]([O-])c1nn(-c2ccc3c(c2)OCCO3)n(O)c1=Nc1ccccc1
823402	0	O=C(CNc1cccc2ccccc12)N/N=C/c1ccc([N+](=O)[O-])o1
823638	0	COC(=O)CCn1nnc(-c2ccc(C(C)C)cc2)n1
823709	0	OC1(c2ccc(OC(F)F)cc2)CSC(=Nc2cccnc2)N1C1CC1
823973	0	O=C(CCCN1C(=O)/C(=C/c2ccccc2Cl)SC1=S)NNC(=O)c1ccccc1Cl
826117	1	CN(C)c1cc[n+](Cc2c(Cl)cccc2Cl)cc1.[Cl-]
826941	0	Cc1ccc(C(=O)Nc2sc3c(c2C(=O)O)CCCCC3)o1
829409	0	c1ccc(-c2nnc(-c3ccccn3)nc2NC2CCCCC2)cc1
830238	0	CN(C(=O)c1cccc(NC(=O)Cc2ccc(NC(=O)C3CCCN(C(=O)CCc4ccccc4)C3)cc2)c1)C1CCCCC1
830341	0	COc1ccc(-c2cn(-c3ccccc3)c3[n+]2CCS3)cc1.O.[Br-]
831366	0	Cn1cnc([N+](=O)[O-])c1Sc1nc(N)nc2c1ncn2C1OC(CO)C(O)C1O
833024	0	Cc1ccc(CSC(Nc2ccc(F)cc2)=C(C#N)C#N)cc1
833541	0	C#Cc1ccc(NC(=O)C2(C)CCN2C(=O)Cc2ccc(C(C)(C)C)cc2)cc1
834720	0	CCCn1c2c(c(=N)c3c1CCC3)CCCC2.I
835162	1	COc1cc(CSc2nnnn2-c2ccc(C)cc2)cc(OC)c1OC
837893	0	COCCn1c(SCCCC(=O)c2ccc(Br)cc2)nnc1-c1ccncc1
838079	0	COc1ccc(C(=O)Nc2ccc(S(=O)(=O)N3CCc4ccccc43)cc2)cc1
838555	1	Cc1ccc(C(=O)C(C(=O)/C=C/c2ccccc2)=C2SCCCS2)cc1
838877	1	COc1cc(/C=C/C(=O)c2ccc(C)cc2)ccc1OCC#N
839498	1	CC(=NNC(=S)N1CCN(c2ccccn2)CC1)c1nccs1
840339	0	Cc1c(C(C)C)c(=O)n(-c2ccc(S(=O)(=O)NCc3ccccc3)cc2)n1C
842058	0	COc1cc(C=NO)nc(-c2ccccn2)c1
843285	0	Nc1nc2ccc(Cl)cc2cc1C(=O)NCc1ccc(Oc2ccccc2)cc1
843604	0	CCN(CC)C1=CC(=[N+]2CCCC2)CC(C)(C)C1.[I-]
843652	0	COc1cccc(C2=CC(=O)CC(C)(C)C2)n1
844036	0	CC(C)C(=O)NC(c1ccc(Cl)cc1Cl)c1ccc2cccnc2c1O
844046	0	Nc1ccc(Oc2cccc(Oc3ccc(N)cc3)c2)cc1
844174	0	C=CCNc1nc2c(c(=O)n(C)c(=O)n2C)n1CCCCCC
845567	1	Cc1ccc(S(=O)(=O)Oc2ccccc2/C=N/NC(N)=S)cc1
845583	0	O=C(Cc1ccc(Cl)cc1Cl)Nc1ccncc1Cl
848023	1	Cc1nc2ccccc2n1Cc1ccc(Cl)cc1
848267	0	Clc1ccc(OCCN2CCN(c3ncnc4sccc34)CC2)cc1
848732	0	CCOc1cc(/C=C2\CCC/C(=C\c3cc(Cl)c(O)c(OCC)c3)C2=O)cc(Cl)c1O
848736	0	COc1ccc(-c2ccc(C(=O)NCc3ccncc3)c3occc23)c(C)c1
848793	0	O=c1c2ccc(Cl)cc2nc(-c2cccc(C(F)(F)F)c2)n1O
849577	0	O=C1C(SCCO)=C(SCCO)C(=O)c2ccccc21
851916	0	CN(C)S(=O)(=O)c1cccc(CSCc2cccc(S(=O)(=O)N(C)C)c2)c1
851992	0	NC(=O)c1ccc(N2CCN(S(=O)(=O)c3cccs3)CC2)c([N+](=O)[O-])c1
852704	0	Cc1ccc(N(Cc2cc(=O)[nH]c3ccccc23)C(=O)CCl)c(C)c1
852715	0	Cc1cccc(-n2ncc3c2CCCC3NC(=O)c2ccncc2)c1C
854128	0	COc1ccc(OC)c(Cc2cnc3nc(N)nc(N)c3c2C)c1.O=S(=O)(O)CCO
854418	1	CN1CCN(c2ccc(CNS(=O)(=O)Cc3cccc(C(F)(F)F)c3)cc2)CC1
854704	0	CCCOC(=O)c1[nH]c2c(c1C)C(=O)CC(c1cc(OC)c(OC)c(OC)c1)C2
854939	0	Clc1ccc(-c2nnc(CSc3nnc(-c4cccs4)n3Cc3ccccc3)o2)cc1
854958	1	COc1ccc2c(c1)/C(=C/c1cc(OC)c(OC)c(OC)c1)C(=O)N2
854968	1	O=C(COc1ccc(Nc2ccccc2)cc1)Nc1ccncc1
856019	0	Cc1cc(S(=O)(=O)NCc2ccncc2)c(C)cc1Br
856140	0	O=C(CSc1n[nH]c(-c2ccccn2)n1)Nc1ccc(Cl)cc1
856248	0	COc1ccc(C(=O)C2CCCN(Cc3cccn3-c3ccc(Cl)cn3)C2)c(OC)c1
856297	0	Cn1c2c(c(=O)n(C)c1=O)C(C(F)(F)F)(C(F)(F)F)N=C(CCC1CCCCC1)N2
856931	0	CC12CCC(O)CC1CCC1C2CCC2(C)C(C3=CC(=O)OC3)C(O)CC12O
856964	0	COC(=O)c1ccc(COC(=O)c2[nH]c(C)c(C(C)=O)c2C)o1
857537	0	Cc1cc(C)c(S(=O)(=O)/N=C2\C=C(Nc3ccc(C(=O)O)cc3)C(=O)c3ccccc32)c(C)c1
861664	1	Cc1cccc2sc(NNC(=O)c3ccc(S(=O)(=O)N4CC(C)CC(C)C4)cc3)nc12
864329	1	C[C@]12CC[C@H](O)C[C@H]1CC[C@@H]1C2CC[C@]2(C)[C@@H](C3=CC(=O)OC3)[C@@H](O)C[C@]12O
864333	0	Cc1nc2ccc(NC(=O)c3cccs3)cc2c(=O)n1Cc1ccc(Cl)cc1
866034	1	COc1ccc(NS(=O)(=O)c2ccc(NC(=O)c3ccc(N(C)S(C)(=O)=O)cc3)cc2)cc1
866500	1	Cc1ccc(CC(=O)Nc2ccncc2)cc1
866501	1	COc1ccc(/C=C/C(=O)c2cc(F)ccc2OC(=O)c2ccccc2C)cc1OC
866503	0	CCn1cc(CN(C)S(=O)(=O)c2ccc3ccccc3c2)c(C)n1
867936	0	c1ccc(-c2cccc(-c3ccccn3)n2)nc1
869237	0	CCOc1ccc(NC(=O)Cn2cc(C(C)=O)c3ccccc32)cc1
872287	0	COC1C(=O)CCC2(CO2)C1(O)C1(C)OC1CC=C(C)C
872375	0	Cc1cc(OCc2nc(N)nc(N)c2-c2ccc(Cl)c(Cl)c2)ccc1[N+](=O)[O-]
873949	1	CC[C@]1(O)C[C@@H]2CN(CCc3c([nH]c4ccccc34)[C@@](C(=O)OC)(c3cc4c(cc3OC)N(C)[C@H]3[C@@](O)(C(=O)OC)[C@H](OC(C)=O)[C@]5(CC)C=CCN6CC[C@]43[C@@H]65)C2)C1.O=S(=O)(O)O
874291	1	C=CCn1c(O)c(C(C)=NCc2cc(OC)cc(OC)c2)c(=O)[nH]c1=O
878169	0	COc1ccc(NC(=O)C2Cc3c(-c4ccc5c(c4)OCO5)ccnc3O2)cc1OC
878335	0	COc1cc(C2CC(=O)c3c([nH]c(C(=O)OCCOC(C)C)c3C)C2)cc(OC)c1OC
878541	0	CC(=O)O.Nc1nc(N)c2c(ccc3c2ccn3Cc2cccc([N+](=O)[O-])c2)n1
879195	1	Clc1ccc(-n2ncc3c(N4CCCCCC4)ncnc32)cc1
880868	0	COc1ccc(CC(=O)Nc2ccncc2Cl)cc1
881009	0	CCC(C)Nc1nc(-c2ccccn2)nc2ccccc12
881056	0	CS(=O)(=O)N1CCc2cc(-c3csc(NC(=O)Cc4cccs4)n3)ccc21
882562	0	CN(C)c1ccc(CNc2ncnc3sccc23)cc1
882953	0	COc1ccc(Oc2ccccc2/C=N/O)cc1
883348	1	Brc1ccc2c(c1)CN1CCCC1=N2
884295	0	S=C(NCCc1ccccc1)Nc1cccc2cnccc12
887625	0	CCCCCc1ccc(OCCCC[n+]2ccccc2)c(CCCCC)c1.[Cl-]
889102	0	CCc1c(C)nc2ncnn2c1NCCc1ccc(OC)cc1
889237	1	Cc1sc2ncnc(NCC(O)c3ccc([N+](=O)[O-])cc3)c2c1C
889424	0	[Br-].c1ccc(-n2c(-c3cccs3)c[n+]3c2CCc2ccccc2-3)cc1
890163	0	Cc1ccc(/C=C/C(=O)c2c(C)cc(C)[nH]c2=O)cc1
892017	1	CCCOC(c1ccccc1)(c1ccc(C(F)(F)F)cc1)C(Oc1nc(C)cc(C)n1)C(=O)O
892315	0	CC(O)CC(=O)OC[C@]12CC[C@@H]3[C@@]4(C)CCCC(C)(C)[C@@H]4CC[C@@]3(C)[C@@H]1CC(C1=CC(=O)OC1O)O2
892451	0	Cc1cc(C(=O)COC(=O)c2ccccc2O)c(C)n1CC1CCCO1
893110	1	CC[n+]1c(/C=C/N(C)c2ccccc2)sc2ccc(Cl)cc21.[O-][Cl+3]([O-])([O-])[O-]
893207	1	COc1ccc2[nH]c3c(C)c4cc[n+](C)cc4c(C)c3c2c1.[I-]
894181	1	CC(=O)NC(c1ccc(C(C)C)cc1)c1ccc2cccnc2c1O
894322	0	COc1ccc(-n2cc(-c3ccc(C)cc3)[n+]3c2SCC3)cc1.[Br-]
894520	1	COc1ccccc1C(=O)Nc1nc2ccccc2s1
895157	0	Cc1ccc(S(=O)(=O)[O-])cc1.c1cnc2c(c1)ccc1ccc[nH+]c12
895660	0	CCN(CC)CCn1c2ccccc2c2cnc(N)c(C#N)c21
898678	0	N=c1c2c(-c3ccccc3)c(-c3ccccc3)n(Cc3ccco3)c2ncn1CCO
899545	0	O=C(c1ccccc1)c1nn(-c2ccc(Cl)cc2)c(=O)cc1C(F)(F)F
900061	1	CC1CCC/C=C/C2CC(O)CC2C(O)/C=C/C(=O)O1
900795	0	Cc1[nH]c(=O)c(C(=O)/C=C/c2ccccc2)c2c1CCCC2
900801	0	CCCC(=O)NC(c1ccc(Cl)cc1)c1ccc2cccnc2c1O
900806	0	CCN1/C(=C/c2ccc3cc(C)ccc3[n+]2CC)Sc2cc(C)c(C)cc21.[I-]
900837	1	C=CCn1c(C)cc(C2=NNC(=NCC)SC2)c1C.Cl
901690	0	COc1ccc2[nH]c3c(C)c4ccncc4c(C)c3c2c1
902705	1	Br.N=c1ccn(CC(=O)c2ccc(-c3ccccc3)cc2)cc1
903862	0	CN(C)CCC(=O)N1C/C(=C/c2ccccc2)C(=O)/C(=C\c2ccccc2)C1.Cl
906542	1	CC[C@@]1(O)C(=O)OCc2c1cc1n(c2=O)Cc2cc3c(N)cccc3nc2-1
907197	1	Cc1ccc(C(=O)Nc2sc3c(c2C(=O)O)CCC(C)C3)o1
909943	0	Cn1c(=O)c2cc(NC(=O)CCc3ccc(O)cc3)ccc2n1Cc1cccc(C(F)(F)F)c1
910667	0	C[C@H]1[C@@H](OS(=O)(=O)O)C[C@@H]2C[C@H]([C@@H](O)c3cc(=O)[nH]c(=O)[nH]3)NC3=NC[C@H]1N32
913250	0	COc1ccc(/C=C2/CSC/C(=C/c3ccc(OC)c(OC)c3)C2=O)cc1OC
913304	0	COc1cccc(C(NC(C)=O)c2ccc3cccnc3c2O)c1
915026	0	COc1ccc(/C=C2\SC(=O)N(CCCC(=O)Nc3cc(Cl)ccc3C(=O)O)C2=O)cc1
915856	0	CCN(CC)CCC(=O)N1C/C(=C/c2ccccc2)C(=O)/C(=C\c2ccccc2)C1.Cl
917183	1	C=C1C(=O)[C@]23C[C@H]1CCC2[C@@]1(C)C(C[C@@H]3O)[C@](C)(C(=O)OC)CC[C@@H]1OC(C)=O
917237	0	CN(C)CCNc1ccc2nnn3c4ccc(O)cc4c(=O)c1c23
919526	1	CCc1ccc(/C=C/c2c[nH]c3ccccc23)[n+](CC)c1.[I-]
919665	0	C/C(=N\N=C(N)N)c1cc(Cl)ccc1Cl.CC(=O)O
920148	0	COc1ccc(OC)c2nc3c(C(=O)NCCN(C)C)cccc3nc12.Cl
921775	0	O=C1[C@@H]2Cc3c([nH]c4ccccc34)C(c3ccc([N+](=O)[O-])cc3)N2C(=O)CN1C1CC1
921932	0	CC(=NNC(=S)Nc1cccc(Cl)c1)c1ccccn1
921967	1	CNc1c2cccc(C)c2nc2c(C(=O)NCCN(C)C)cccc12.Cl
926663	0	CC[n+]1ccccc1/C=C1\Sc2ccc(C)cc2N1C.[I-]
927567	0	CCCCC(=O)NC(c1ccccc1Cl)c1ccc2cccnc2c1O
928277	1	CCC(=O)NC(c1ccc(Cl)cc1Cl)c1ccc2cccnc2c1O
929434	0	CCCCC(=O)NC(c1ccccc1)c1ccc2cccnc2c1O
929896	1	COc1ccc(S(=O)(=O)N2CCOCC2)cc1NC(=O)CCNC(=O)c1ccc([N+](=O)[O-])cc1
930040	0	CC1C/C(=C/c2ccncc2)C(=O)/C(=C/c2ccncc2)C1
931268	0	CC(=O)Nc1ccc(Nc2c3ccccc3nc3ccccc23)cc1
931812	0	C[n+]1c2n(c3ccccc31)N=C(c1ccc(-c3ccccc3)cc1)CS2.[Br-]
932064	0	[Cl-].c1ccc2c(c1)[I-]c1ccccc1-2
934786	1	NC(=O)c1cccc(-c2cnc(N)c(C(=O)c3cccnc3)n2)c1.O=C(O)C(F)(F)F
935238	0	O=C(OCC12CC3CC(CC(C3)C1)C2)c1ccc(NCc2cc(O)ccc2O)cc1
935927	0	O=C(Nc1ccc([N+](=O)[O-])cc1)c1ccc(Cn2cc([N+](=O)[O-])cn2)cc1
936105	1	COc1ccc(NC(=O)c2sc(=O)n(Cc3ccc(F)c(Cl)c3)c2C)cc1OC
936147	1	O=C1C=CC2(C=C1)O[C@H](Cc1ccccc1)[C@@H](Cc1ccccc1)O2
936270	1	NC(=S)NN=Cc1cc(-c2cccc(N)c2)ccn1
936435	1	Cc1ccc(S(=O)(=O)Nc2ccccc2C(=O)Nc2nc(-c3ccc(F)cc3)cs2)cc1
937247	0	COc1ccc(C(=O)Nc2nnc(Cc3cccs3)s2)cc1OC
937982	1	Nc1cc2ccncc2c2ccccc12
938100	0	CN(c1ncnc(N)c1[N+](=O)[O-])C1CCCCC1
939600	0	CCOc1cc(/C=C2\N=C(SC(C)C(N)=O)N(c3ccc(OC(F)F)cc3)C2=O)ccc1O
939709	0	CCC(C)n1ncn(-c2ccc(N3CCN(c4ccc(O)cc4)CC3)cc2)c1=O
939750	1	CC1(C)CC(N2CCN(Cc3ccccc3)CC2)=CC(=[N+]2CCCCC2)C1.[I-]
939827	0	COc1ccc(Cn2c(-c3ccc(C)cc3)c[n+]3ccccc23)cc1.[Br-]
940059	1	C=C1C(=O)C23CCC4C(C)(C(=O)OC)CCCC4(C)C2CCC1(O)C3
941921	0	COc1ccc(NC(=O)c2sc(=O)n(Cc3cccc(C(F)(F)F)c3)c2C)cc1OC
944164	1	Cn1cc(/C=C/c2cc[n+](C)cc2)c2cc(Cl)ccc21.[I-]
944383	0	COc1cc2nc(CN3CC=C(c4ccccc4)CC3)[nH]c(=O)c2cc1OC
945537	1	Cc1ccc2c(c1C)-c1c(ccc(C)c1C)C(=O)C2=O
945564	0	Cl.O=C1/C(=C\c2ccccc2)CN(C(=O)CCN2CCCCC2)C/C1=C/c1ccccc1
946742	0	COc1ccc(-c2c[n+]3c(n2-c2ccc(C)cc2)CCCCC3)cc1.[Br-]
946898	1	COc1ccc(CNC(=O)c2cccc3c(-c4cccc(C(N)=O)c4)coc23)cc1OC
947289	1	CCC[N+]1(CC#CCC(c2ccccc2)c2ccccc2)CCCCC1.[Br-]
947413	1	Cc1cc(C(=O)COC(=O)c2ccccc2O)c(C)n1Cc1cccs1
947532	0	O=C(N/N=C/c1c(O)ccc2ccccc12)c1[nH]ncc1Br
947809	0	O=[N+]([O-])c1cc(CN2CCN(c3ccccc3)CC2)c(O)c2ncccc12
948103	0	COc1cccc(/C=N\NC(=O)c2ccc(Cn3cc(Br)c([N+](=O)[O-])n3)o2)c1O
948294	1	CC[n+]1c(/C=C/N(C)c2ccccc2)oc2ccccc21.O=S(=O)([O-])CCO
950037	0	S=C(NN=C(c1ccccc1)c1ccccn1)N(Cc1ccccn1)Cc1ccccn1
951254	0	NC(=O)c1cc2ccncc2c2ccccc12
951643	1	CC(=O)Nc1sc2c(c1-c1nc3ccccc3s1)CN(C(C)C)CC2
951647	1	CN1C=C/C(=C\c2cc[n+](C)c3ccccc23)c2ccccc21.[I-]
951675	0	CCOC(=O)[C@]12Cc3cc(Cl)ccc3[C@H]1N(CC(=O)OC)C(=O)c1ccccc12
951679	1	CC1CN(S(=O)(=O)c2ccc(C(=O)NCCCn3ccnc3)cc2)CC(C)O1
952234	0	Nc1ncn([C@@H]2O[C@H](CO)[C@@H](O)[C@H]2O)c(=O)n1
952237	0	O=C(Nc1ccccc1Cl)/C(Cl)=C(\Cl)S(=O)c1ccccc1
952514	0	Cc1ccccc1C(=O)N1CCN(c2ccc(NC(=O)c3ccc4c(c3)OCO4)cc2)CC1
952584	0	CC[n+]1cc(C)ccc1/C=C/c1ccc(N(C)C)cc1.[I-]
956572	0	CC(C)(C)OC(=O)NCCCCCc1cn([C@@H](CO)C(=O)NCCCCCCCCCCC(=O)N2CCN(C(=O)OC(C)(C)C)CC2)nn1
958637	0	CCCC(=O)Nc1ccc(C(=O)N/N=C/c2ccc([N+](=O)[O-])o2)cc1
960954	1	CN(C)c1ccc(Sc2ccc3nc(N)nc(N)c3c2)cc1
961305	0	CC(=O)NC(c1ccc(Cl)cc1Cl)c1ccc2cccnc2c1O
966872	0	Cc1ccc(/C=C2/CNC/C(=C/c3ccc(C)cc3)C2=O)cc1.Cl
967677	1	COc1ccc(C=C2CS(=O)(=O)CC(=Cc3ccc(OC)cc3)C2=O)cc1
969014	0	CCn1c(C)cc(C(=O)COC(=O)c2ccccc2[N+](=O)[O-])c1C
969886	1	CCOC(=O)c1[nH]c2ccc(Cl)cc2c1N=NN1CCSCC1
971004	1	CCOC(=O)C(C(C)=O)c1c(Br)c(O)c(O)c2c(C(=O)c3ccc(C)cc3)coc12
972218	1	O=C(N/N=C/c1ccc(O)cc1O)c1ccc(CN2C(=O)c3cccc4cccc2c34)cc1
972436	0	Cc1ncc(CO)c(/C=N/NC(=O)c2cc3c(s2)CCCC3)c1O
972499	0	COc1cccc2c1C(=O)c1c(O)c3c(c(O)c1C2=O)C[C@@](O)(C(=O)CO)C[C@@H]3OC1CC(N)C(O)C(C)O1
972599	0	CCOc1cc(/C=C2\CN(CC)C/C(=C\c3ccc(O)c(OCC)c3)C2=O)ccc1O.Cl
972733	1	C=C1C(=O)C23C(O)C1CCC2C12CCCC(C)(COC(C)=O)C1C(O)C3(O)OC2
973007	0	C=C1C(=O)c2sccc2C(c2ccc(OC)c(OC)c2)C1COC(C)=O
973047	0	S=C(NCCCc1cnc[nH]1)NCCCN(Cc1ccc(Cl)cc1)c1ccc(Br)cn1
973892	1	COC1=CC(=O)c2c(ccc3ncnc(N)c23)C1=O
973989	1	NC(=S)NN=Cc1nccc2c(C(F)(F)C(F)(F)C(F)(F)F)cccc12
974101	0	CCC1(OC(=O)CN)C(=O)OCc2c1cc1n(c2=O)Cc2cc3ccccc3nc2-1.Cl
974271	1	O=C(NN=Cc1ccccc1O)NN=Cc1ccccc1O
974634	0	O=C(c1ccccc1)c1c2c(cc3sc4ccccc4[n+]13)-c1cccc3cccc-2c13.[Br-]
974969	1	Cc1cccc2cc(-c3ccccc3)c(-c3ccccc3)c[n+]12.[Br-]
975378	0	COc1cccc(/C=N/NC(=O)c2ccc(-c3ccccc3)cc2)c1O
975422	0	Cc1ccc2c(c1)c(/C=C/c1cc[n+](C)cc1)c(C)n2C.[I-]
975783	0	COc1ccc(-c2cn(-c3ccc(OC)cc3)c3[n+]2-c2ccccc2CC3)cc1.[Br-]
977647	0	COc1cccc(/C=N/Nc2ncnc3c2ncn3Cc2ccccc2)c1O
978050	1	O=c1c2ccccc2nc(N/N=C/c2c(O)ccc3ccccc23)n1O
979428	0	O=C(O)C1CCCN1c1nc(-c2ccc(Cl)c(Cl)c2)cc(C(F)(F)F)n1
979489	1	CN=c1scc(-c2ccccc2F)n1/N=C/c1ccc[nH]1
979491	0	Cc1ccc2c(C)c3ccc4ccccc4c3c[n+]2c1.[O-][Cl+3]([O-])([O-])O
979629	1	CCC(C)N(CC(=O)Nc1cccc(C)c1C)C(=O)CCl
979677	0	Cc1ccccc1CN1CC2=C(CCN(Cc3ccccc3)C2=O)N2CCN=C12
979678	0	CC(=O)NC(c1ccc2ccccc2c1)c1ccc2cccnc2c1O
979681	0	Cc1[nH]c2ccccc2c(=O)c1C(=O)/C=C/c1ccccc1
979820	0	C[C@H]1CCC/C=C/[C@@H]2C[C@H](O)C[C@H]2[C@H](O)[C@H](S(=O)c2ccc(O)cc2)CC(=O)O1
980159	0	Cc1ccc(NC(=O)[C@H](Cc2c[nH]c3ccccc23)NC(=O)[C@@H]2Cc3ccccc3CN2)c(C)c1
982623	1	N=c1c2c(-c3ccccc3)c(-c3ccccc3)n(Cc3ccccc3)c2ncn1CCO
983424	0	O=C(NN=Cc1c(O)ccc2ccccc12)c1ccncc1
984185	0	CC(C)c1oc(=O)cc2c1[C@@H](O)[C@H]1OC(=O)[C@@]3(C)C[C@@H](O)[C@@H](O)[C@@]2(C)C13
984403	0	CC(C)(C)c1ccc(C(=O)Nc2sc3c(c2C(=O)O)CCC3)cc1
984429	0	C[C@H]1CCC/C=C/[C@@H]2C[C@H](O)C[C@H]2[C@H](O)/C=C/C(=O)O1
984852	1	Cl.N=c1c2c(n(Cc3ccc(Cl)cc3)c3c1CCC3)CCC2
988923	0	CN(C(=O)OC(C)(C)C)c1ccc(-c2nc3ccccc3s2)cc1
990758	0	Oc1ccc(CCNc2ncnc3ccc(Cl)cc23)cc1
990988	0	CN(C)CCNc1ccc2ncn3c4ccc(O)cc4c(=O)c1c23.Cl
992531	1	N#Cc1sc2nccc(Nc3ccccc3)c2c1N
992688	1	CCC1(O)C(=O)OCc2c1cc1n(c2=O)Cc2cc3c(N)cccc3nc2-1
992804	0	CC1=C(CO)C(=O)OC([C@@H](C)C2CC[C@H]3C4C[C@H]5O[C@]56[C@@H](O)C=CC(=O)[C@]6(C)C4CC[C@]23C)C1
994072	0	CCN(CC)CCn1nc2c3c(cccc3c1=O)-c1ccccc1-2
997073	1	Cc1ccc(-c2cc3cccc[n+]3cc2-c2ccc(C)cc2)cc1.[Br-]
997438	0	O=C(Nc1nc(-c2ccccc2)cs1)c1ccccc1NS(=O)(=O)c1ccc(F)cc1
997451	0	C[C@@H]1C[C@@H]2O[C@H]2/C=C\C=C\C(=O)Cc2c(Cl)c(O)cc(O)c2C(=O)O1
998685	0	NC1=C(Br)C(=O)c2ncccc2C1=O
998900	0	Cc1cc(C2=NNC(=NC3CC3)SC2)c(C)n1-c1ccccc1F
999249	0	Cl.O=C1/C(=C\c2ccc(Cl)c(Cl)c2)CN(C(=O)CCN2CCOCC2)C/C1=C/c1ccc(Cl)c(Cl)c1
999529	1	CC(C)(C)C(=O)/C(=C/c1ccc(Cl)cc1)n1cncn1
1000253	0	COc1cc(NS(C)(=O)=O)ccc1Nc1c2ccccc2nc2ccccc12.Cl
1002870	0	Cc1cc(/C=c2/sc3nc4ccccc4n3c2=O)c(C)n1-c1ccccn1
1007873	0	COc1ccc(C2=Nn3c([n+](C)c4ccccc43)SC2)cc1.[Br-]
1010323	1	CCc1ccccc1Nc1nn2c(=O)c3ccc(C(=O)NCc4ccccn4)cc3nc2s1
1014406	0	COc1ccc(C(=O)N/N=C(\c2ccccc2)c2ccccn2)cc1
1014820	1	COc1ccc(NC(=O)c2cc(-c3cc(Cl)ccc3C)n[nH]2)cc1OC
1017506	0	CN1OC[C@@H]2CN[C@H](c3ccc(-c4cc5ccccc5o4)cc3)C[C@@H]21
1017691	0	Cc1ccnc2c1ccc1c(C)ccnc12.O
1017694	0	COc1cccc(/C=N/Nc2ncnc3scc(-c4ccccc4)c23)c1O
1017989	0	O=C(NC1CCCCC1)C(c1cccnc1)N(C(=O)CCl)c1ccccc1Cl
1021987	0	CCN(CC)c1ccc(/C=N/NC(=O)c2cccc(S(=O)(=O)N3CCOCC3)c2)c(O)c1
1040619	1	CC(=NNC(=S)N1CC2CCC(CC2)C1)c1ccccn1
1043221	0	Cc1nn(Cc2ccc(C(=O)Nc3nccs3)cc2)c(C)c1Cl
1043739	0	COc1cc(NC(=O)COc2cc(O)c3c(c2)OC(C)(C)CC3=O)cc(OC)c1OC
1046754	1	CCCCCCCCCCCCCCCCn1cc[n+](C)c1.[Br-]
1055931	1	COc1ccc(C(=O)NCCN(C)C)c2nc3ccccc3cc12.Cl
1072148	1	O=C1c2cccc3cc([N+](=O)[O-])cc(c23)C(=O)N1CCN1CCCC1
1073876	0	Cc1cc(C)c[n+](C(C)C(=O)c2ccc(-c3ccccc3)cc2)c1.[Br-]
1073957	0	CCc1nc(N)nc(N)c1-c1ccc(N(C)Cc2ccccc2)c([N+](=O)[O-])c1
1074929	0	COc1ccccc1-c1nnc(Sc2nc([N+](=O)[O-])nn2C)o1
1075907	0	Clc1ccc2c(c1)-c1ccccc1C1=NCCN12
1076022	1	Cc1c(C)c2cccnc2c2ncccc12
1076035	0	CC(C)(C)Nc1nc(-c2ccccn2)nc2ccccc12
1076183	0	CC(=NNC(=S)N1CCN(C2CCCCCC2)CC1)c1ccccn1
1076192	0	O=c1cnnc(N/N=C/c2ccccn2)[nH]1
1076445	0	CCCCC(=O)NC(c1ccc(Cl)cc1Cl)c1ccc2cccnc2c1O
1077464	0	CCOC(=O)c1ccc(NC(=O)c2ccc(C)c(S(=O)(=O)N3CCOCC3)c2)cc1
1078331	1	c1ccc(CNc2nc(-c3ccccn3)nc3ccccc23)cc1
1080609	1	NC(=S)NN=Cc1nccc2c(C(F)(F)F)cccc12
1081942	1	O=C(NCCc1ccccc1)c1ccc2c(c1)OCCCO2
1081951	0	CC1CCCN(c2ncnc3c2cnn3-c2ccc(Cl)cc2)C1
1082799	0	COc1ccccc1C(=O)Nc1nc2ccccc2[nH]1
1082978	0	CCOc1ccc(-n2c(-c3ccccc3)c[n+]3c2CCCCC3)cc1.[Br-]
1082996	0	NS(=O)(=O)c1ccc(NC(=O)/C=C/c2ccc3c(c2)OCO3)cc1
1086028	0	Oc1ccccc1N=Nc1nc(-c2ccccc2)c(-c2ccccc2)[nH]1
1086218	0	C=CC(=O)N1C/C(=C/c2ccc(Cl)cc2)C(=O)/C(=C\c2ccc(Cl)cc2)C1
1087128	0	Cc1ncc(CO)c(/C=N/Nc2ccc(C(F)(F)F)cn2)c1O
1087765	0	CCN1/C(=C\c2ccc3cc(C)ccc3[n+]2CC)Sc2cc(C)c(C)cc21.[I-]
1088487	0	Cc1ccnc2c1ccc1cccnc12
1088499	1	COC(=O)c1cc(O)cc(OC)c1Oc1cc(C)cc(O)c1C(=O)O
1088534	1	Nc1nc(=S)c2ncn([C@@H]3O[C@H](CO)[C@@H](O)[C@H]3O)c2[nH]1
1088553	0	COc1cc2c(cc1OC)C1C(=O)c3ccc4c(c3OC1CO2)CC(C(C)C)O4
1088558	0	CC[C@@]1(O)C(=O)OCc2c1cc1n(c2=O)Cc2cc3c(CN(C)C)c(O)ccc3nc2-1.Cl
1088565	0	CCC(C)(C)c1ccc(Oc2ccc(N)cc2)cc1
1088717	0	O=C(CCCN1C(=O)S/C(=C\c2ccccc2)C1=O)NNC(=O)c1ccccc1O
1088818	0	CC1(C)CC(N2CCN(c3ccccc3)CC2)=CC(=[N+]2CCCC2)C1.[I-]
1088819	0	CC(C)(C)c1ccc(C(=O)Nc2ccc(C(=O)NCc3cccnc3)cc2)cc1
1088821	0	OC[C@H]1O[C@@H](n2cnc3c(NCc4ccco4)ncnc32)[C@H](O)[C@@H]1O
1088985	0	CN(C)CCNc1ccc(CO)c2sc3ccc(O)cc3c(=O)c12
1090052	1	Cl.N=c1c2c(n(Cc3ccc(F)cc3)c3c1CCC3)CCCC2
1090053	1	COc1cccc2c1C(=O)c1c(O)c3c(c(O)c1C2=O)CC(O)(C(C)=NO)CC3OC1CC(N)C(O)C(C)O1
1091455	0	Br.CC(=O)c1cccc(N=c2scc(-c3ccc(S(=O)(=O)N4CCOCC4)cc3)n2CCO)c1
1091600	0	CCCCn1c2c(c(=N)c3c1CCC3)CCC2.I
1091676	0	CN(C)CCNC(=O)c1ccc(Cl)c2cc3ccccc3nc12.Cl
1091989	0	CC(NNC(=S)N1CCN(c2ccccn2)CC1)c1nccc2ccccc12
1093850	0	O=C(O)CSCC(=O)Nc1ccc(C2CCCCC2)cc1
1094049	0	CCN(CC)c1ccc(/C=N/NC(=O)c2c(Cl)cnn2C)c(O)c1
1094903	0	CC[n+]1ccc(/C=C/c2c[nH]c3ccccc23)cc1.[Cl-]
1096383	0	CCC(C)(C)c1ccc(OCCCC[n+]2ccccc2)c(C(C)(C)CC)c1.[Br-]
1098492	0	N#Cc1c(NC(=O)CSc2ncn[nH]2)sc2c1CCCCC2
1098513	0	O=C(NCCc1ccccc1F)c1ccc2c(c1)OCCO2
1099239	0	O=C(Nc1ccc(N2CCN(C(=O)c3ccco3)CC2)cc1)c1ccc2c(c1)OCO2
1100572	0	Cc1c(P(=S)(c2ccccc2)c2ccccc2)[n+]2ccccc2n1C/C=C/c1ccccc1.[Br-]
1101791	0	COc1ccc(NC(=O)c2cc(-c3cc(C)cc(F)c3)n[nH]2)cc1OC
1103893	0	CC(C)(C)N(Cc1ccc2c(c1)OCO2)C(=O)/C=C\S(=O)c1ccccc1
1104204	0	Cc1ccc2oc(/N=C(\N)NC(=O)C(C)(C)C)nc2c1
1104205	0	Cc1ccc(C(=O)Nc2sc3c(c2C(=O)O)CCCC3)o1
1104217	0	CC#CC[N+](C)(C)CCCCCCCCCCCC.[Br-]
1106353	0	O=C(c1cc(COc2cccc3cnccc23)on1)N1CCCC(CCCO)C1
1106355	0	CCCCCCCCNc1ncnc2ccccc12
1106359	0	COc1ccc(C(=O)Nc2cnn(Cc3ccc(Cl)cc3)c2)cc1OC
1106360	1	C=CC(=O)N1C/C(=C/c2ccc(F)cc2)C(=O)/C(=C\c2ccc(F)cc2)C1
1106361	1	CC(=NCc1ccc(F)cc1)c1c(O)n(C)c(=O)n(C)c1=O
1106362	0	COc1ccc(CNc2ncnc3ccccc23)cc1
1106576	0	COc1cccc(Cn2c(NCc3cccnc3)nc3c2c(=O)n(C)c(=O)n3C)c1
1111665	0	COc1cc2c(cc1OC)C(c1ccc(-c3ccc(Cl)cc3Cl)o1)=NCC2
1113672	0	CC(C)(C)c1ccc(C(=O)O/N=C(\N)c2ccccn2)cc1
1117945	0	Cl.N=c1c2c(n(Cc3ccccc3)c3c1CCC3)CCC2
1119204	0	Cc1ccc(O)c(N=Nc2nccs2)c1
1119768	0	Cc1cc(/C=N/n2cnnc2)c(C)n1-c1ccc(OCc2ccc(Cl)cc2Cl)cc1
1122592	0	C=CC(=O)N1C/C(=C/c2ccccc2)C(=O)/C(=C\c2ccccc2)C1
1129998	1	O=C(NCc1ccccc1)c1cccc(NC(=O)c2ccccc2)c1
1132644	0	Cc1ccc(S(=O)(=O)Nc2cc(Cl)c(O)c3ncccc23)cc1
1135870	0	CC1CCc2c(sc(NC(=O)CSc3ncn[nH]3)c2C#N)C1
1138680	1	Cc1cc(C)c2sc(NNC(=O)c3ccc(S(=O)(=O)N4CCc5ccccc5C4)cc3)nc2c1
1142837	0	CCOc1ccc(-c2c[n+]3c(n2-c2ccccc2)CCCCC3)cc1.[Br-]
1143231	1	Cc1ccc2[nH]c3nc(N/N=C/c4cccc(O)c4)nnc3c2c1
1147018	0	O=C(Nc1ccc(N2CCN(C(=O)c3ccccc3)CC2)cc1)c1ccc2c(c1)OCO2
1147047	0	[Cl-].c1ccc(C[n+]2cccc3c4ccccc4ccc32)cc1
1150669	1	Cc1ccc(C(=O)C[n+]2cc(-c3ccc(C)cc3)n3c2CCCCC3)cc1.[Br-]
1150803	1	O=C(N/N=C/c1cc2c3c(c1O)CCCN3CCC2)c1ccccc1O
1150831	1	COc1ccc(OCC(=O)N/N=C/c2ccc(O[C@@H]3O[C@H](CO)[C@@H](O)[C@H](O)[C@H]3O)cc2)cc1
1153671	0	O=C1/C(=C\c2ccc([N+](=O)[O-])cc2)CS(=O)(=O)C/C1=C/c1ccc([N+](=O)[O-])cc1
1155337	0	Nc1cc2c3c(cccc3c1)C(=O)N(CCN1CCCC1)C2=O
1161245	0	CC1Cc2cc(-c3csc(NC(=O)Cc4cccs4)n3)ccc2N1S(C)(=O)=O
1162385	0	Cc1c(C)c2ccc(OCC(=O)Nc3ccccn3)c(C)c2oc1=O
1163593	0	N=c1c2c(n(Cc3ccc(F)cc3)c3c1CCC3)CCC2
1163750	0	COc1ccccc1-n1cc([C@@H]2C[C@H]3CN(c4ccccc4)C(=O)[C@]34CCCN24)cn1
1163944	0	O=C(NCc1ccco1)c1cccc(NC(=O)c2ccccc2)c1
1164709	0	CCN(C(C)=O)c1cnc(C=NNC(N)=S)c2ccccc12
1165917	0	CN(C)CC1CCC/C(=C\c2ccc(OC(=O)c3ccc(Cl)cc3)cc2)C1=O.Cl
1167228	1	CCn1c(=NC(=O)CCS(=O)(=O)c2ccccc2)sc2cccc(OC)c21
1173783	0	CCCNC1=C(N(C(C)=O)c2cccc(F)c2)C(=O)c2ccccc2C1=O
1180676	0	COC(=O)C[C@]1(C(=O)OC)CN(C#N)N(c2ccc(Cl)cc2)C12c1ccccc1-c1ccccc12
1180861	0	CCCN(CC)c1ncnc2[nH]ncc12
1182584	0	CCOc1ccc(C(=O)Nc2cnn(Cc3ccc(Cl)c(Cl)c3)c2)cc1
1186128	0	Cc1ccc2[nH]cc(/C=C/c3cc[n+](C)cc3)c2c1.[I-]
1189447	1	COc1ccc(C[C@@H]2OC3(C=CC(=O)C=C3)O[C@H]2Cc2ccc(OC)cc2)cc1
1189450	1	CCN(CC)CCCNc1nc2ccccc2c2[nH]c3ccc(OC)cc3c12.Cl
1194328	0	Brc1ccc2c(c1)-c1ccccc1C1=NCCN12
1201125	0	O=c1c2ccccc2sc2ccc(C#CC3(O)CCCCC3)cc12
1201156	1	Cc1ccc(C(C)C)c(OCc2ccc(C(=O)N/N=C/c3ccc(O)cc3O)cc2)c1
1201904	1	CCCCCc1ccc(OCCCC[n+]2cccc(C)c2)c(CCCCC)c1.[Cl-]
1203818	0	COc1cc(Cn2c3ccc(NC(=O)CCc4ccc(O)cc4)cc3c(=O)n2C)ccc1F
1207794	1	Cn1nccc1C(=O)N/N=C/c1c(O)ccc2ccccc12
1207838	1	COc1cc2c3c(cccc3c1)C(=O)N(CCN1CCCC1)C2=O
1208078	0	CN(C)c1ccc(/C=C/c2ccc3ccccc3[n+]2C)cc1.[I-]
1208225	0	Cc1sc(NC(=O)/C=C/c2ccc3c(c2)OCO3)nc1-c1ccccc1
1208332	0	C(=NN1CCCCCC1)c1ccc2ccccc2n1
1211474	0	COc1ccccc1NC(=S)NN=C(C)c1ccccn1
1216381	0	O=[N+]([O-])c1ccc(N2CCOCC2)c2c1no[n+]2[O-]
1216732	0	COC(=O)c1c(NC(=O)c2cccc([N+](=O)[O-])c2)sc(C(N)=O)c1C
1216754	1	CC(C)(C)C(=O)/C(=C/c1ccncc1)n1cncn1
1222721	1	NC(=O)c1cc([N+](=O)[O-])ccc1NCc1ccc(O)cc1
1226236	0	COc1ccc(CNC(=O)c2cccc3c(-c4cccnc4)coc23)cc1OC
1230208	0	COc1ccc2c(c1)-c1c(ssc1=S)C(C)(C)N2
1231757	1	Cc1ccc2[nH]c(C)c(/C=C/c3cc[n+](C)cc3)c2c1.[I-]
1231799	0	OCC1OC(n2cnc3c(NCc4ccco4)ncnc32)C(O)C1O
1234088	1	O=NN(CC(=O)NNc1ccccc1)CC(=O)NNc1ccccc1
1235984	0	COc1cccc(/C=N/NC(=O)c2c(-c3ccccc3)noc2C)c1O
1236024	1	CCOc1ccc(-n2c(-c3ccc(Br)cc3)c[n+]3c2CCCCC3)cc1.[Br-]
1236342	0	Cc1ccc(/C=C/c2ccc(N(C)C)cc2)[n+](C)c1.[I-]
1236672	0	CCN1CCS/C1=C\C=C\C1=[N+](CC)CCS1.[I-]
1238357	1	O=C(/C=C/c1ccc(O)cc1)c1ccc(NC2=C(N3CCCCC3)C(=O)c3ccccc3C2=O)cc1
1240150	0	COc1ccc(S(=O)(=O)N2CCOCC2)cc1NC(=O)CCNC(=O)c1ccc(Br)cc1
1240200	0	Cc1ccc(-c2cc(-c3ccc(C)cc3)[n+](C)o2)cc1.[O-][Cl+3]([O-])([O-])[O-]
1242806	0	CC1(C)CC(N2CCCCC2)=CC(=[N+]2CCCCC2)C1.[I-]
1243312	0	Cc1cc(C(=O)NC2CCCc3c2cnn3-c2ccc(C)c(C)c2)n(C)n1
1243964	0	COc1ccc(-c2nsc3c(N4CCCCC4C)ncnc23)cc1
1244053	0	Cc1ccc2c(c1)N(C)/C(=C/c1cccc[n+]1C)S2.[I-]
1245647	0	O=C(CCC1CCCC1)Nc1ccc(C(=O)NCc2cccnc2)cc1
1245736	0	O=C1c2cc(F)ccc2-n2c1nc1ccccc1c2=O
1248999	0	CN(C)c1cc[n+](CC(=O)c2ccc(-c3ccccc3)cc2)cc1.[Cl-]
1251267	1	O=C(Nc1ccon1)c1nc[nH]c1C(=O)NCc1ccccc1
1252334	0	CCC1(OC(=O)CN(C)C)C(=O)OCc2c1cc1n(c2=O)Cc2cc3c(N)cccc3nc2-1.Cl
1254472	0	c1ccc(CCNc2nc(-c3ccccn3)nc3ccccc23)cc1
1254473	0	CCCCC(=O)NC(c1ccc(Cl)cc1)c1ccc2cccnc2c1O
1254477	0	COc1cc(C=CC(=O)c2cc(OC)c(OC)c(OC)c2)cc(OC)c1OC
1254489	1	COc1cc(OC)cc(-c2cc3nc(C)c(CCC(=O)O)c(C)n3n2)c1
1254624	0	COc1ccc2c(c1)c[n+](C)c1c3cc(OC)c(OC)cc3ccc21
1254872	0	Cc1cccc(C(=O)Nc2sc3c(c2C(=O)O)CCCC3)c1
1255859	0	Cc1ccc2ccc3ccc(C)nc3c2n1
1256424	0	CC(=NNC(=S)Nc1cccc(C)c1)c1ccccn1
1257531	0	CCN(CC)c1ccc2nc3ccccc3[n+](CC)c2c1.[I-]
1257997	0	COc1cccc(/C=N/Nc2ccc(C(=O)O)cc2)c1O
1260111	0	O=C(Nc1ccc(S(=O)(=O)N2CCCC2)cc1)c1ccc(CN2CCc3ccccc3C2)cc1
1264813	0	CCCc1ccc(-c2ccc(/C=C/C(=O)O)cc2)nc1
1265434	1	O=C(NCc1ccccc1)c1cccc(NC(=O)c2ccco2)c1
1265627	0	COc1cc(C(=O)/C=C/c2cccnc2)c([N+](=O)[O-])cc1OC
1266032	1	CN(C)CCN1C(=O)c2cccc3cc([N+](=O)[O-])cc(c23)C1=O
1267226	0	Cc1cc(C(=O)CN2C(=O)c3ccccc3S2(=O)=O)c(C)n1CC1CCCO1
1267735	0	CCC(NC(=O)CCc1c(C)c2cc3c4c(oc3cc2oc1=O)CCCC4)C(=O)O
1271305	0	COc1ccc(-c2nc(-c3ccccn3)no2)cc1
1272394	1	O=c1[nH]c(=O)n(C2C[C@H](O)[C@@H](CO)O2)cc1C(F)(F)F
1273302	0	O=C(N/N=C/c1cc(Cl)ccc1O)C(=O)Nc1ccccc1OC(F)(F)C(F)F
1275231	1	CN1CCN(c2ncnc3scc(-c4ccccc4Cl)c23)CC1
1276569	1	COc1ccccc1/C=C/C(=O)c1c2c(c(C)[nH]c1=O)CCCC2
1279154	0	COc1ccc2[nH]c(=O)c3c(c2c1)OC(C)(C)C=C3
1279932	0	Cl.c1ccc(CNc2ncnc3ccccc23)cc1
1281119	1	Cn1cc(C(=O)N/N=C/c2c(O)ccc3ccccc23)ccc1=O
1287749	0	Cc1ccc(-c2nc(-c3ccccn3)no2)cc1
1289394	0	Oc1ccc(-c2n[nH]c(=S)n2-c2ccc3c(c2)OCCO3)c(O)c1
1290059	0	COC(=O)C1CCCCN1C(=O)c1cc(COc2cccc3cnccc23)on1
1291067	0	O=C(NN=C(c1ccccc1)c1ccccn1)c1ccccc1
1291084	1	CCN(CC)S(=O)(=O)c1cccc(NC(=O)COC(=O)c2[nH]c(C)c(C(C)=O)c2C)c1
1293420	0	Brc1ccc2ncnc(NCc3cccnc3)c2c1
1295190	0	CCOC(=O)c1c(C)n(C)c2ccc(OC)c(NC(=O)c3cccs3)c12
1296154	0	Cl.OCCN1CCN(c2ncnc3ccc(Br)cc23)CC1
1296963	1	Cc1csc(CNc2ncnc3ccc(-c4ccoc4)cc23)c1
1299980	0	C/C(=N\NC(=O)C(C)Oc1ccc([N+](=O)[O-])cc1)c1ccccn1
1300245	0	CC(=O)c1ccc(-n2c(C)c(C(C)=O)c3cc(O)ccc32)cc1
1301702	0	Cc1cccc(-n2ncc3c(N(C)C4CCCCC4)ncnc32)c1
1303721	0	C=C1C(=O)[C@@]23[C@@H](CC[C@@H]1[C@H]2O)[C@]1(C)[C@@H](O)CCC(C)(C)[C@H]1C[C@H]3O
1304193	1	Cc1cccc(CNc2ncnc3ccc(-c4ccoc4)cc23)c1
1304231	0	O=C(CCc1ccccc1)NC(c1cccs1)c1cc(Cl)c2cccnc2c1O
1304330	1	O=C(/C=C/c1ccccc1)CC(O)(c1ccccc1)C(F)(F)F
1307598	0	CSCCC(c1nnnn1Cc1ccccc1)N1CCC(n2c(=O)[nH]c3ccccc32)CC1
1309471	0	c1nc(NCc2ccc3c(c2)OCO3)c2cc(-c3ccoc3)ccc2n1
1311013	1	C=CCN(CC=C)c1ncnc2[nH]ncc12
1312086	1	Cc1nnc(SCC(=O)N2CCC(c3noc4ccc(F)cc34)CC2)s1
1315623	1	CC(=NCc1cccc(Cl)c1)c1nc(-c2ccco2)oc1O
1316027	0	CCN1CCN(c2ncnc3ccc(Br)cc23)CC1
1316617	0	Cc1nn(-c2ccccc2)c(Cl)c1C(=O)N1CCN(c2ncnc3c2cnn3-c2ccccc2)CC1
1321013	1	COc1ccc(-n2c(=S)[nH]c3cc(C(=O)Nc4ccc(F)cc4)ccc3c2=O)c(OC)c1
1321677	1	COC1C(CO)OC(n2c3c(Cl)cccc3c3c4c(c5c6cccc(Cl)c6[nH]c5c32)C(=O)NC4=O)C(O)C1O
1322134	0	COc1ccc(CC(=O)Nc2cccc(-c3nnc(-c4ccccc4)o3)c2)cc1OC
1323359	0	CC(C)(CO)CNc1ccn2nccc2n1
1325822	0	Cc1ccccc1-c1cc(C(=O)Nc2sc(C(=O)OC(C)C)c(C)c2C#N)c2ccccc2n1
1327610	0	Nc1nc(=O)n(C2CC(O)C(CO)O2)cc1F
1331247	1	Cn1c(/C=C/c2cccc([N+](=O)[O-])c2)c([N+](=O)[O-])c(=O)n(C)c1=O
1338529	0	CC(C)=CC(O)C/C(C)=C/COc1ccc2ccc(=O)oc2c1
1339478	0	C/C(=N\NC(=O)c1nnn(-c2nonc2N)c1-c1ccccc1)c1ccccc1O
1342143	0	CN(C)CCNC(=O)c1cccc2nc3c(ccc4ccccc43)nc12.Cl
1344474	0	COc1cc(/C=C/C(=O)Nc2ccc(OC)c(S(=O)(=O)N3CCOCC3)c2)ccc1OCC#N
1344689	0	COc1cc2c(cc1O)C[C@H]1NCCc3cc4c(c-2c31)OCO4
1345012	1	c1cc(-c2cnc3cccnn23)c2cccnc2c1
1345238	1	Cl.Oc1ccc(Nc2nc(N3CCCC3)c3ccccc3n2)cc1
1346476	1	CC[n+]1ccccc1/C=C/c1ccc(N(C)C)cc1.[I-]
1346846	0	COc1ccc(-n2ncc3c(N(C)C4CCCCC4)ncnc32)cc1
1348232	1	O=c1cccc2c1c1cc[nH]c3ccc(=O)n2c31
1348878	0	CCOC(=O)c1c(C)c2c(=O)[nH]cnc2n1-c1ccccc1
1350142	0	Cn1c(=O)c2c(nc(NCc3ccco3)n2C/C=C/c2ccccc2)n(C)c1=O
1354104	0	c1ccc(CCc2nn3c(-c4ccncc4)nnc3s2)cc1
1355631	0	O=C(NC(=O)N1CCN(c2cccc(Cl)c2)CC1)c1ccccc1
1355640	0	COc1ccc(C(=O)N/N=C/c2cc(Br)ccc2O)cc1OC
1356309	0	O=c1c2ccccc2cnn1-c1nc2ccccc2[nH]1
1359156	0	O=C(Nc1ccc(N2CCN(C(=O)c3ccc(Cl)cc3)CC2)cc1)c1ccc2c(c1)OCCO2
1361234	0	CCN1CCN(c2ccc(Nc3ccnc4ccccc34)cc2)CC1
1362001	1	O=S(=O)(/C(=C\c1ccc(C(F)(F)F)cc1)c1nc2ccccc2[nH]1)c1ccccc1
1363188	0	Nc1ncnc(NCc2ccccc2)c1[N+](=O)[O-]
1373207	0	OCCNc1c2ccccc2nc2ccccc12
1379067	0	COc1ccc2cc3cc(C(=O)NCCc4ccc(OC)c(OC)c4)oc3nc2c1
1380879	0	Cc1ccc(S(=O)(=O)N2C[C@@H]3CCCC[C@@H]3[C@@H](C)[C@H]2c2cn(Cc3ccccc3)c3ncccc23)cc1
1380898	1	COc1ccc(Nc2ncnc3ccc(Br)cc23)cc1OC
1381611	1	Cc1c2ccncc2c(C)c2c1[nH]c1ccccc12
1382504	0	CCN(CC)S(=O)(=O)c1ccc(/C=C/C(=O)Nc2ccc(Br)cc2F)cc1
1384107	0	COc1ccc(-c2cc(=O)oc3cc(OC(=O)C4CCCCC4)c(Cl)cc23)cc1
1384245	0	CCCC(=O)NC(c1ccccc1OC)c1ccc2cccnc2c1O
1393528	1	Cc1cn([C@@H](CCCCNC(=O)OC(C)(C)C)C(=O)NCCCCCCCCCCC(=O)N2CCN(C(=O)OC(C)(C)C)CC2)nn1
1399755	1	CN(C)CC(C(=O)c1ccccc1)c1ccccc1.Cl
1400099	0	COc1ccc(-c2cn[nH]c2N)c(OC)c1
1405137	1	Cc1ccccc1C(=O)N1CCN(c2ccc(NC(=O)c3ccc4c(c3)OCCO4)cc2)CC1
1416037	0	COc1ccc2sc3c(=O)[nH]c4ccccc4c3c2c1
1416750	0	COc1ccc(-c2nc(-c3ccc(NC(=O)c4ccncc4)cc3)no2)cc1OC
1416790	0	Cc1ccc(C(=O)CN2C(=O)c3ccccc3S2(=O)=O)cc1
1418022	0	Cc1nn(Cc2cccc(F)c2)c(C)c1NC(=O)c1ccc(COc2ccccc2Cl)cc1
1418151	0	O=C1C=CC(=C(c2ccc(O)cc2)c2ccc(O)cc2)C=C1
1418293	0	Nc1ncc([N+](=O)[O-])c(N2CCCCCC2)n1
1424731	1	CS(=O)(=O)Nc1ccc(-c2cnc3cccnn23)cc1
1427983	0	CC(=C/c1ccccc1)/C=N/n1c(-c2ccncc2)n[nH]c1=S
1432458	0	COc1ccc(N(C(=O)CCl)C(C(=O)NC2CCCCC2)c2cccnc2)cc1
1432812	0	COc1ccc2c(c1)[nH]c1c(C)nccc12.Cl
1434960	0	N=c1c2c(-c3ccccc3)c(-c3ccccc3)n(Cc3ccco3)c2ncn1CCCO
1435137	0	Cc1cccc(C)c1-n1nnnc1C(CCc1ccccc1)N1CCC(n2c(=O)[nH]c3ccccc32)CC1
1435307	0	Cc1nc2sc(C(N)=O)c(N)c2c2c1CCCC2
1435354	0	c1cc(-c2nnc3sc(C4CCCCC4)nn23)ccn1
1440378	0	N=c1c2c(-c3ccccc3)c(-c3ccccc3)n(Cc3ccccc3)c2ncn1CCCO
1440852	0	Cc1ccc(CNc2ncnc3ccc(-c4ccoc4C)cc23)o1.O=C(O)C(F)(F)F
1442659	0	c1csc(C2=Nn3c(nnc3-c3ccncc3)SC2)c1
1445210	0	C/C(=N\Nc1ncnc2sc(C)c(C)c12)c1ccccn1
1446150	0	Cc1ccc(/C=N/NC(=O)C2=NNC(c3ccccc3)(c3ccccc3)C2)c(O)c1
1448653	0	Cc1c(Cl)c([N+](=O)[O-])nn1Cc1ccc(C(=O)N/N=C\c2cc(Cl)ccc2O)o1
1450063	0	Cc1cc(C)c2c(N)c3ccccc3nc2n1
1450426	1	CCOC(=O)C(=Cc1cc(=O)c(OC)co1)C(=O)OCC
1450611	1	CC1(Cc2ccc(Cl)cc2)C(=O)Nc2ccc(-c3cccnc3)cc21
1452801	1	COc1ccc(-c2csc(NC(=O)C3CCN(c4ncnc5sc(C)c(C)c45)CC3)n2)cc1OC
1455419	0	COC(=O)c1cc(C)nc2c1C(=O)C(=O)C=C2N1CCOCC1
1456592	1	COc1ccc2[nH]c3c(c2c1)CC(C)NC3=O
1460629	0	CC(C)CCNC(=O)C(c1ccncc1)N(Cc1cccs1)C(=O)Cn1nnc(-c2ccc(F)cc2)n1
1462058	0	COC(=O)c1cc(N/C(N)=N/c2nc(C)cc(C)n2)cc(C(=O)OC)c1
1468086	0	CC(C)Cn1c(N)c(C(=O)CSc2ccc3c(c2)OCCO3)c(=O)n(C)c1=O
1469432	0	Cc1ccc(Sc2c(C=O)c3ccccc3n2C)cc1
1471355	1	c1cncc(CNc2ncnc3ccc(-c4ccoc4)cc23)c1
1471730	0	CCOc1ccc(-n2c(C)c(C(C)=O)c3cc(O)ccc32)cc1
1472216	1	Cc1cc(C)c2nc3nc(C)c(C)cc3c(N)c2c1
1472218	1	O=C(Nc1ccc(N2CCN(C(=O)c3ccccc3F)CC2)cc1)c1cncc(Br)c1
1472220	1	CCCC(=O)NC(c1ccc(Cl)cc1Cl)c1ccc2cccnc2c1O
1472329	0	CCOc1ccc(-n2c(C)c(C(C)=O)c3cc(OC(C)=O)ccc32)cc1
1472663	1	Cn1nnnc1Sc1ncnc2scc(-c3cccc(Br)c3)c12
1472851	0	Cc1csc(-c2cc(C(=O)NCc3cc(C(F)(F)F)cc(C(F)(F)F)c3)n[nH]2)c1
1473245	0	CCn1c(Oc2ccccc2F)nc2c1c(=O)n(C)c(=O)n2C
1473436	0	O=C(Nc1ccc(S(=O)(=O)N2CCCCC2)cc1)c1ccc(CN2CCOCC2)cc1
1473969	1	CCN1CCS/C1=C/C=C/C1=[N+](CC)CCS1.[I-]
1474387	0	CCN(c1ccc(OC)cc1)c1ncnc2nc[nH]c12
1474457	0	O=C(NCc1ccco1)c1cccc(NC(=O)c2ccco2)c1
1475476	0	Cc1ccc2nc(NNC(=O)c3ccc(S(=O)(=O)N4CCc5ccccc5C4)cc3)sc2c1
1475780	0	CCCCC(=O)NC(c1cccs1)c1cc(Cl)c2cccnc2c1O
1475855	0	CCN(CC)CCCNc1ccc2ncn3c4ccc(O)cc4c(=O)c1c23.Cl
1476615	0	C=C1C(=O)OC2CC1C(O)CC(C)=CCCC(C)=CC(O)CC2C
1476993	0	O=C(/C(=C/c1ccc(Cl)cc1)c1nc2ccccc2[nH]1)c1cccs1
1477005	0	COc1ccc(C(C(=O)NC2CCCCC2)N(C(=O)CCl)c2ccc(C)cc2)cc1
1477188	0	CC1(Cc2cccc(F)c2)C(=O)Nc2ccc(-c3cccnc3)cc21
1477619	0	O=C(NNc1ccccc1)C(=O)NNc1ccccc1
1477777	1	NC(=O)N=Nc1c2[nH]c3ccccc3nc-2c2ccccc12
1478472	0	O=C(N/N=C/c1ccccc1O)c1cccc(C(F)(F)F)c1
1479487	0	O=C(N/N=C/c1cc(Br)ccc1O)c1ccncc1
1479685	0	CN(CC1CCCO1)S(=O)(=O)c1ccc(C(=O)Nc2nc3cc4c(cc3s2)OCO4)cc1
1480482	0	CCCN(CC(=O)Nc1ccccc1C)C(=O)CCl
1481412	0	NC(=O)c1sc2nccc(Nc3ccccc3)c2c1N
1482352	0	O=C(N/N=C/c1cc(Cl)cc(Cl)c1O)c1ccncc1
1483511	0	CN(C)C(=O)c1cccc(-c2cnc3sc(NCc4ccc5c(c4)OCO5)nn23)c1
1483512	0	CN(C)/C=C/C(=O)c1ccc2noc(-c3ccccc3)c2c1
1483761	1	CC1CC2=C(CC1/C=N/NC(N)=S)C(C)(C)CCC2
1485477	0	COc1ccc2[nH]c3c(c2c1)CCNC3=O
1485941	0	c1ccc(-c2noc(-c3ccc4c(c3)OCO4)n2)nc1
1486505	1	Cc1nc2ccc(NC(=O)c3ccc(Cl)c(S(=O)(=O)N(C)c4ccccc4)c3)cc2s1
1486794	0	Cc1nc(N)nc(N)c1-c1ccc(Cl)c(Cl)c1
1486985	0	CC(=O)c1cccc(NC(=O)Nc2cccnc2)c1
1487160	0	COc1cc(Cl)cc(/C=N\NC(=O)c2ccc3c(c2)OCO3)c1O
1488983	0	COc1ccc(CNc2nn3c(-c4cccc(C(=O)N(C)C)c4)cnc3s2)cc1
1489051	0	CCc1c(C)nc2ccc(Br)cc2c1SCCC#N
1489420	0	C#CCN(C[C@@H]1[C@@H](OC(=O)NCCCCCC)[C@@H](OC(=O)NCCCCCC)Cn2c(=O)ccc(=O)n21)S(=O)(=O)c1ccc(C)cc1
1493877	0	CN1CCN(c2ncnc3ccc(Br)cc23)CC1
1497062	0	O=C1c2cccc(OCc3ccc(F)cc3)c2CCN1Cc1ccc(F)cc1
1504737	1	Nc1nonc1-n1nnc(C(=O)N/N=C/c2cc(Br)ccc2O)c1CSC1=NCCS1
1504739	1	Cc1cc(CSc2ccccc2)ccc1NC(=O)c1ccc(CN2CCOCC2)cc1
1505783	0	CCN(CC)CCNc1nc2cc(OC)c(OC)cc2c2nc(-c3ccccc3)nn12
1505784	0	O=[N+]([O-])c1ccc2ncnc(Nc3ccc4c(c3)OCCO4)c2c1
1505905	0	O=C(N/N=C/c1ccccc1OC(=O)c1ccco1)c1ccc([N+](=O)[O-])cc1
1506472	0	Cc1cc(Sc2nnc(/N=C/N(C)C)s2)c2ccccc2n1
1507035	1	Cc1c(C(C)NC(=O)c2cc(COc3cccc4cnccc34)on2)cnn1C
1508818	0	Cc1cccc(N2CCN(S(=O)(=O)c3cc(-c4cc(C)no4)ccc3C)CC2C)c1
1509017	0	CSc1nc(N)nc2c1ncn2CC(=O)N1CCN(Cc2c(C)cc(C)cc2C)CC1
1511092	0	C[n+]1c2n(c3ccccc31)N=C(c1ccccc1)CS2.[Br-]
1511103	0	COc1ccc(-c2cncnc2-c2ccc(OC)cc2O)cc1
1511959	0	CN(Cc1ccc(OC(F)F)cc1)C(=O)c1cccc(S(=O)(=O)N2CCN(Cc3ccccc3)CC2)c1
1518980	0	c1ccc(CNc2ncnc3ccccc23)cc1
1520390	0	CC(C)Cn1c(N)c(C(=O)COC(=O)CC23CC4CC(CC(C4)C2)C3)c(=O)n(C)c1=O
1522490	0	COC(=O)C1=C(CN2CCCc3ccccc32)NC(=O)NC1c1ccc(F)cc1
1522597	0	Cn1c(=O)c2c(nc(Oc3ccc4ccccc4c3)n2C)n(C)c1=O
1527238	1	CN(Cc1nccs1)C(=O)c1cc(COc2cccc3cnccc23)on1
1527239	0	O=C(C1CCC(CNS(=O)(=O)c2cccs2)CC1)N1CCN(c2ccc(Cl)cc2)CC1
1531273	0	CN1CC(=O)N2C(c3cccc([N+](=O)[O-])c3)c3[nH]c4ccccc4c3C[C@H]2C1=O
1531402	1	CCN(CC)S(=O)(=O)c1cc(NC(=O)C2CCN(c3ncnc4sc(C)c(C)c34)CC2)ccc1Cl
1536777	0	COc1ccc(-c2cn[nH]c2-c2ccc(OC)cc2)cc1
1545968	0	O=[N+]([O-])c1ccc(C[n+]2cccc3c4ccccc4ccc32)cc1.[Br-]
1547781	1	Cc1ccc(-c2nnn(CC(=O)N(Cc3cccs3)C(C(=O)NC3CCCC3)c3ccncc3)n2)cc1
1560402	0	CN(c1ncnc(N)c1[N+](=O)[O-])C1CCS(=O)(=O)C1
1562623	1	C[C@H]1Cn2cnc(C(=O)Nc3cccc(Cl)c3)c2C(=O)N1
1566198	1	COc1cccc(N(C(=O)CCl)C(C(=O)NCCc2ccccc2)c2cccs2)c1
1567207	0	O=C(Nc1ccccc1Oc1ccccc1)c1cc([N+](=O)[O-])ccc1Cl
1582648	0	CN1CC(=O)N2C(c3ccc(Cl)cc3)c3[nH]c4ccccc4c3C[C@H]2C1=O
1583275	0	CC(C)c1ccc(-c2csc(NC(=O)c3cccs3)c2C(=O)O)cc1
1585636	0	NC(=O)C(C(=O)/C=C/c1ccc(Cl)cc1)=C1SCCS1
1587345	1	O=C1NC(=S)N/C1=C\c1cccnc1
1589731	1	CN(C)C=Nc1ncc2c3ccccc3n(CCN(C)C)c2c1C#N
1589774	0	COc1ccc(Nc2nc(N3CCCC3)nc3ccccc23)c(OC)c1
1590889	0	O=C(NC1CCCC1)C(c1ccccc1)N(Cc1ccco1)C(=O)Cc1cccs1
1602005	1	O=C(CCSc1nc2ccccc2s1)N/N=C/c1c(O)ccc2ccccc12
1602347	1	NC(=O)c1ccc(N2CCN(S(=O)(=O)c3ccccc3)CC2)c([N+](=O)[O-])c1
1604452	0	Nc1ccc(C(=O)N/N=C\c2cc(N=Nc3cccc4ccccc34)ccc2O)cc1
1610886	1	CCN(CC)CCNc1ccc(C)c2sc3ccc(O)cc3c(=O)c12
1611092	0	O=C1NC(=S)N/C1=C/c1cccnc1
1621141	0	COc1ccc(-c2coc3c(C(=O)Nc4cc(OC)c(OC)c(OC)c4)cccc23)c(C)c1
1622297	1	Clc1ccc(-c2csc3ncnc(NCCN4CCOCC4)c23)cc1
1627401	1	Cc1cc(C)nc(SCC(=O)Nc2ccnc3ccccc23)n1
1653621	0	Cc1nc2ccccc2c(N)c1C(=O)/C=C/c1ccccc1
1656924	0	COc1ccc(-n2c(NNC(C)=O)nc3sc4c(c3c2=O)CCCC4)cc1
1667643	0	N#CC(C#N)=NNc1ccc2cn[nH]c2c1
1715432	1	Cl.Oc1ccc(Nc2ncnc3scc(-c4ccccc4)c23)cc1
1716838	1	CCCCOC(=O)c1[nH]c2c(c1C)C(=O)CC(c1cc(OC)c(OC)c(OC)c1)C2
1721191	1	CCOC(=O)c1cc2sccc2n1CC(=O)N1CCc2ccccc21
1725625	0	CCCCc1ccc(NC(=O)c2ccc(N(C)S(C)(=O)=O)cc2)cc1
1736284	0	CCCCCCCCCCCCCCCCCCNc1ccn(C2OC(COP(=O)(O)OCC3OC(n4cc(F)c(=O)[nH]c4=O)CC3O)C(O)C2O)c(=O)n1
1738452	0	CN([C@@H](Cc1ccc(OS(=O)(=O)c2cccc3cnccc23)cc1)C(=O)N1CCN(c2ccccc2)CC1)S(=O)(=O)c1cccc2cnccc12
1740950	1	Brc1ccc2ncnc(NCc3ccco3)c2c1
1748303	1	C=Cc1ccc(CC2(C)C(=O)Nc3ccc(-c4cccnc4)cc32)cc1
1748426	0	CCN1CCN(S(=O)(=O)c2cc(OCC(=O)NC3CCCCC3)c(C)cc2Cl)CC1
1751796	1	CNc1cncc(-c2ccc(NS(C)(=O)=O)cc2)n1
1756351	1	O=C(Sc1cccc2cccnc12)c1ccc(F)cc1
1757274	1	O=C(Nc1nc(-c2ccc3ccccc3c2)cs1)C1CCN(S(=O)(=O)c2cccs2)CC1
1757570	1	Cc1cc(C)c(C#N)c(SCc2nnc(-c3ccccc3)o2)n1
1759638	1	Cc1oc2c(Cl)c(Cl)c(O)c(CN(C)C)c2c1C(=O)c1ccc(Cl)cc1
1759886	1	NC(=O)c1sc2nc3c(c(-c4ccco4)c2c1N)CCC3
1760601	1	COc1ccc(Cc2noc(CN3CCN(c4ccc(Cl)cn4)CC3)n2)cc1OC
1760987	1	COc1cc2ccccc2ccc1=NO
1767486	0	CC(C)c1ccc(-c2csc3ncnc(N4CCN(C)CC4)c23)cc1
1769385	0	Clc1ccc(CSc2nnc(-c3ccncc3)o2)cc1
1771880	0	Cc1csc(N=Cc2ccc([N+](=O)[O-])o2)n1
1773316	1	COCCNc1nc(Oc2cncc(Cl)c2)c2sccc2n1
1776080	0	Cn1nnnc1N=N/C(=N/Nc1ccccc1)c1ccccc1
1779937	1	COc1cccc2nc3c(C(=O)NCCN(C)C)cccc3cc12.Cl
1796835	0	COc1cc2oc(=O)cc(-c3ccc(-c4ccc(CO)cc4)cc3)c2c(OC)c1OC
1802773	1	O=c1[nH]c2ccccc2n1C1CCN(C(c2cccs2)c2nnnn2Cc2ccccc2)CC1
1805735	0	COc1ccc(NC(=O)COc2ccccc2Cc2ccccc2)cc1S(N)(=O)=O
1806255	0	O=C(Nc1cccc(S(=O)(=O)Nc2ccccc2Cl)c1)c1ccc(Cl)nc1
1811199	0	COc1cccc(N2CCN(c3c(C#N)c(C(F)(F)F)nn3C)CC2)c1
1811598	1	CC(C)c1nc(NCCO)c(C#N)c2c1CCCC2
1811924	1	CC(C)(C)OC(=O)NCCCCCNC(=O)c1nc[nH]c1C(=O)NCCCCCNC(=O)OC(C)(C)C
1824920	0	CC(=CCOc1ccc2ccc(=O)oc2c1)C1=CC(=O)C(C)(C)O1
1825884	0	O=C(Nc1ccc(C(=O)N2CCOCC2)cc1)Nc1cccc(C(F)(F)F)c1
1828296	1	Cc1ccccc1C(=O)N1CCN(c2ccc(NC(=O)CSc3ccc(Cl)cc3)cc2)CC1
1831782	0	Cc1[nH]ccc2c1[nH]c1cc(=O)ccc12
1836620	0	CC(CC(=O)Nc1ccc(Cl)c(S(=O)(=O)N2CCOCC2)c1)c1ccccc1
1838412	0	Cc1cc(C)c(CN2CCN(C(=O)Cn3cnc4c(OCc5ccccc5)ncnc43)CC2)c(C)c1
1842321	1	O=C(N/N=C/c1cc(Cl)ccc1O)c1ccc(Br)cc1
1843069	1	N#CC(C#N)c1ccnc2ccccc12
1847781	0	O=C(CCl)N(C1CCCC1)C1CCS(=O)(=O)C1
1851222	0	CC(C)Nc1ccc(Nc2ccnc3cc4ccccc4cc23)cc1
1853925	1	c1cc2c(cc1C1=NNC(=NC3CC3)SC1)OCCO2
1858684	1	CCCN1C=CC(=C2C(=O)c3ccccc3C2=O)C=C1
1861546	1	CC(=O)c1c(C)n(-c2ccccc2)c2ccc(O)cc12
1868423	0	O=C(CSC1=NCCS1)Nc1ccnc2ccccc12
1878864	1	OC[C@@H]1CN(Cc2ccncc2)C[C@H](n2cnc3c(N4CCN(c5ccccc5)CC4)ncnc32)O1
1880649	1	CC(=O)c1ccc(Nc2ncnc3ccc(Br)cc23)cc1
1881562	1	Cc1csc(SCC(=O)Nc2cccc3nsnc23)n1
1881759	0	CCOC(=O)c1ccccc1OC(=O)NNc1ccccc1
1883073	1	Nc1nc(=O)n(C2OC(CO)C(O)C2O)cc1F
1883291	1	CC(C)c1ccc(-c2nnn(CCC(=O)O)n2)cc1
1888848	1	CCc1cc(-c2[nH]ncc2-c2ccc3c(c2)OCO3)c(O)cc1O
1890004	0	COc1ccc(Cl)cc1Nc1nc(-c2sc(NC(=O)C(C)(C)C)nc2C)cs1
1895649	0	CC1(C)CCSC(/C=C/c2ccccc2)=N1
1898213	0	O=C(Nc1ccc([N+](=O)[O-])cc1)Nc1ccc(OC(F)F)c(Cl)c1
1901112	0	CC1Sc2ccc(Cl)cc2-c2nc(N)ncc21
1901314	0	COc1ccc(-n2c(C)c([N+](=O)[O-])c3ccc(O)c(CN4CCCCC4)c32)cc1.Cl
1904284	0	O=C(Nc1nc(-c2ccc(F)c(F)c2)cs1)c1ccc(OCC2CCCO2)cc1
1912517	0	COc1ccc2cc3cc(C(=O)NCc4cccs4)oc3nc2c1
1915589	1	O=C(CCCCC(=O)NN=Cc1ccccc1O)NN=Cc1ccccc1O
1917244	1	COc1ccc(-c2cc3nc(C)n(N)c(=O)c3s2)cc1
1922102	0	Cc1[nH]ccc2cc3nc4ccccc4c3cc12
1922279	0	COc1cc2cncc(Cc3ccc(Cl)cc3)c2cc1OC.CS(=O)(=O)O
1922551	0	O=C(N/N=C/c1cc(O)ccc1Br)c1cccnc1
1925774	0	OCCCNc1ncnc2scc(-c3ccc(Cl)cc3)c12
1930124	0	CCN(CC)c1ccc2cc(NC(=O)CCC(=O)O)c(=O)oc2c1
1930935	1	CCOc1cc(/C=C2\COc3ccccc3C2=O)cc(Br)c1OCC(=O)N(C)C
1931465	1	Cl.O=C(c1ccccc1)C(CN1CCCC1)c1ccccc1
1941609	1	CC(=O)Nc1ccc(S(=O)(=O)c2ccnc3cc(Cl)ccc23)cc1
1941714	0	Clc1ccc(-c2csc(=Nc3cccnc3)n2CCCn2ccnc2)cc1Cl
1943770	0	Cc1ccc2nc(NC(=O)CCCC(=O)O)sc2c1
1948833	1	COc1ccc(-c2cn[nH]c2-c2ccc(O)cc2O)cc1
1948928	1	Brc1ccc2ncnc(Nc3ccc(N4CCOCC4)cc3)c2c1
1949827	0	CC1=C(C(=O)OCc2ccc3c(c2)OCO3)C(c2ccc(O)c([N+](=O)[O-])c2)NC(=O)N1
1952616	0	COc1ccc2cc3c(N)nn(C(=O)c4ccc(F)cc4)c3nc2c1
1952659	1	COc1cccc(-c2ccc3ncnc(NCc4cccnc4)c3c2)c1
1954059	0	C#Cc1ccc(NC(=O)C2(C)CCN2C(=O)Cc2ccc(-c3ccccc3)cc2)cc1
1960480	0	COc1ccc2cc3c(N)nn(C(=O)c4cccc([N+](=O)[O-])c4)c3nc2c1
1962930	1	CCN(CC)c1ncnc2ccc(Br)cc12
1963940	0	Cc1ccc2cc3cc(C(=O)NCc4ccco4)oc3nc2c1
1964370	0	O=C1C(Nc2ccccc2)=C(N2CCCCC2)C(=O)c2ccccc21
1967479	1	Cc1ccc(C(=O)Nc2nc(-c3ccccn3)cs2)cc1S(=O)(=O)N1CCOCC1
1968392	1	Cc1cc(CNC(=O)c2cccc([N+](=O)[O-])c2C)c2ccccc2n1
1971769	1	CC(=O)c1cn(Cc2ccccc2F)c2ccccc12
1974654	0	CCOc1ccc(NC(=O)c2ccc(CN3CCc4ccccc4C3)cc2)cc1
1975791	0	Cc1ccc(-n2c(O)c(C=Nc3cc(C)on3)c3ccccc3c2=O)c(C)c1
1979096	0	COc1cccc(CN(C)C(=O)c2ccc(OCC(=O)Nc3cccc(C(F)(F)F)c3)c(OC)c2)c1
1983334	1	COc1cccc(/C=N/NC(=O)c2cc(-c3cccn3C)n[nH]2)c1O
1988485	0	CC(=O)N1CCCc2cc(S(=O)(=O)N3CCCC(C(=O)N4CCN(c5cccc(Cl)c5)CC4)C3)ccc21
1989712	0	CCCCCCn1c(NCC)nc2c1c(=O)n(C)c(=O)n2C
1991339	1	O=[N+]([O-])c1ccc(Oc2ccc(F)cc2)c2ccncc12
1994388	0	O=c1[nH]c(=O)n([C@H]2C[C@H](O)[C@@H](CO)O2)cc1F
1998339	1	CCOC(=O)C1CCN(C(=O)c2ccc(OCC(=O)Nc3cccc(C(F)(F)F)c3)c(OC)c2)CC1
1999904	1	CC1(Cc2ccc(F)cc2)C(=O)Nc2ccc(-c3cccnc3)cc21
2002841	0	COc1ccc2cc3c(N)nn(C(=O)c4ccc(Cl)c([N+](=O)[O-])c4)c3nc2c1
2006037	0	CC1=C(C(=O)OCc2ccc3c(c2)OCO3)C(c2cccc([N+](=O)[O-])c2)NC(=O)N1
2009461	0	CCOc1cc(/C=C(/C#N)c2ccc(Cl)cc2)cc(Cl)c1OCC(=O)O
2011756	0	O=[N+]([O-])c1ccc(O)c(/C=N/Nc2ccccn2)c1
2015821	0	CCOC(=O)NNC(=O)CCn1c2c(c3ccccc31)CCCC2
2018623	0	COc1ccc(C2=Nn3c(nnc3-c3ccncc3)SC2)cc1
2020836	0	c1csc(CNc2ncnc3ccc(-c4ccoc4)cc23)c1
2034627	0	Cn1c(Sc2ccc(Cl)cc2)c(C=O)c2ccccc21
2036464	1	O=C(NCc1ccccc1)c1csc(-c2cccnc2)n1
2037850	1	Cc1noc(/C=C/c2ccccn2)c1[N+](=O)[O-]
2040656	1	O=c1cc(-c2ccccc2Cl)oc2c([N+](=O)[O-])c(O)cc(O)c12
2046793	0	CCOc1cc(Br)cc(/C=N/NC(=O)c2cccnc2)c1O
2048059	0	Cc1cc(NC(=O)Cc2ccccc2)c2ccccc2n1
2048070	0	Nc1ccc(Cn2ccc3c4c(N)nc(N)nc4ccc32)cc1
2049751	0	CCc1ccc(N(CC)c2ncnc3nc[nH]c23)cc1
2052803	1	CC1CCCCN1c1ncnc(N)c1[N+](=O)[O-]
2055896	1	O=C(Nc1ccncc1)c1ccc(Cl)c(S(=O)(=O)N2CCc3ccccc32)c1
2056784	0	O=c1[nH]c2ccccc2n1C1CCN(C(CCc2ccccc2)c2nnnn2Cc2ccccc2)CC1
2058973	0	COCCn1c(C)cc(C(=O)COC(=O)c2ccccc2Br)c1C
2059325	0	COc1ccc(NS(=O)(=O)c2ccc(NC(=O)c3ccc(N(C)S(C)(=O)=O)cc3)cc2)c(OC)c1
2061050	0	CN1CCN(c2ccc(-c3ccc4ccccc4n3)cc2)CC1
2063649	0	CCC(=O)NC(c1ccc(C)cc1)c1ccc2cccnc2c1O
2064069	0	COc1cccc(Nc2ncnc3ccc(Br)cc23)c1
2072948	1	O=C(N/N=C\c1c(O)ccc2ccccc12)c1cncc(Br)c1
2079007	0	COc1ccc(-n2c(SC(C)C(=O)Nc3ncc(Cl)cc3Cl)nc3ccccc32)cc1
2079535	0	Cc1nc2c(o1)C(=O)c1ccccc1C2=Nc1ccccc1
2080976	0	Cc1nc(SCC(=O)Nc2nc3ccccc3s2)c(C#N)c(C)c1C
2082265	0	CC(=O)c1sc(NC(=O)C2(F)C(F)(F)C(F)(F)C(F)(F)C(F)(F)C2(F)F)nc1C
2082614	0	N#CC(c1ccc(Cl)cc1)c1ccc2c(C(F)(F)F)cc(C(F)(F)F)nc2n1
2083077	0	O=C(C=P(c1ccccc1)(c1ccccc1)c1ccccc1)c1ccccc1-c1ccccc1C(=O)C=P(c1ccccc1)(c1ccccc1)c1ccccc1
2083979	0	COc1ccc(Cc2nnc(N/N=C/c3ccccc3O)[nH]c2=O)cc1OC
2083990	0	O=[N+]([O-])c1ccc(O)c(/C=N/Nc2ccc(Cl)nn2)c1
2084142	1	CC1CCN(Cc2c(C(=O)N/N=C/c3cc(Br)ccc3O)nnn2-c2nonc2N)CC1
2085043	0	COc1ccc(-c2csc(NC(=O)c3ccccc3NS(=O)(=O)c3ccc(F)c(F)c3)n2)cc1
2085064	0	CC(C)C[C@H](NC(=O)c1nc[nH]c1C(=O)N1CCN(C(=O)OC(C)(C)C)CC1)C(=O)OC(C)(C)C
2085548	0	O=C(NCc1cccs1)c1nc2c(nnn2Cc2ccccc2Cl)c(=O)[nH]1
2085773	0	O=C1C(Nc2ccccc2)=C/C(=N/S(=O)(=O)c2cccs2)c2ccccc21
2086090	1	CCOc1cc(/C=C2\CN(C)C/C(=C\c3ccc(O)c(OCC)c3)C2=O)ccc1O.Cl
2086773	1	CC(=NNC(=S)N1CC2CCC(CC2)C1)c1nccs1
2087148	1	CCN(CC)c1ccc(/C=N/Nc2nc(C)cc(=O)[nH]2)c(O)c1
2089191	0	COc1cccc(NC(=O)Nc2nc(-c3ccc(OC)c(OC)c3)cs2)c1
2089406	0	CCOC(=O)c1c(NC(=O)c2c(-c3ccccc3)noc2C)sc(C)c1-c1ccccc1
2091092	1	Cc1ccc(C)c(CN2C(=O)c3ccccc3S(=O)c3ccc(C(=O)N4CCN(c5ccccn5)CC4)cc32)c1
2091399	0	O=C(N/N=C/c1c(O)ccc2ccccc12)c1cccc(C(F)(F)F)c1
2092142	1	CC1Cc2ccccc2N1S(=O)(=O)c1cccc(C(=O)N2CCN(c3ncccn3)CC2)c1
2092983	0	CC(C)(C)c1nnc(N/N=C/c2ccccc2O)n(N)c1=O
2093014	0	COC1CC(C)C(OC)c2cc(O)cc(c2O)NC(=O)C(C)=CC=CC(C)C(OC(N)=O)C(C)=CC(C)C1OC
2094064	0	Cc1ccc(C[n+]2c(-c3ccc(C)cc3)cc(-c3ccc(C)cc3)cc2-c2ccc(C)cc2)cc1.[O-][Cl+3]([O-])([O-])[O-]
2094416	0	CC1(C)CC[C@]2(C(=O)n3ccnc3)CC[C@]3(C)[C@H](C(=O)C=C4[C@@]3(C)CC[C@H]3C(C)(C)C(=O)C(C#N)=C[C@]43C)[C@@H]2C1
2094589	0	O=C1C(=O)c2ccccc2-c2ccccc21
2094919	0	COC(=O)c1cc2c(n1S(=O)(=O)c1ccc(C)cc1)C(=O)C(=O)c1[nH]cc(C(=O)OCc3ccccc3)c1-2
2095932	0	CC1=C(N2CC2)C(=O)C(CO)=C(N2CC2)C1=O
2097533	0	CC1=CC2OC3CC4OC(=O)C=CC=CC(=O)OCCC(C)C(O)C(=O)OCC2(CC1O)C4(C)C31CO1
2098617	0	Cc1[nH]nc2ccc(-c3cncc(OC[C@@H](N)Cc4c[nH]c5ccccc45)c3)cc12
2099133	0	CCOC(=O)N=Nc1c2ccccc2c2nc3no[nH]c3nc12
2099434	1	CCOc1ccc(-c2c(C)n(-c3ccc(OCC)cc3)c3[n+]2CCCCC3)cc1.[O-][Cl+3]([O-])([O-])[O-]
2100018	1	C=CC[n+]1ccc(/C=C2\C=Cc3cc(C)ccc3N2CC)c2ccccc21.[Br-]
2100087	0	CC(=NNc1nc2ccccc2o1)c1cc2ccccc2cn1
2100093	0	COCCn1c(C)cc(C2=NNC(=NC3CC3)SC2)c1C.Cl
2100255	0	CC(C)[C@H]1C(=O)O[C@H](C(C)C)C(=O)N(C)[C@@H](C(C)C)C(=O)O[C@H](C(C)C)C(=O)N(C)[C@@H](C(C)C)C(=O)O[C@H](C(C)C)C(=O)N1C
2100274	0	Br.CCCCCCCCCn1c2c(c(=N)c3c1CCC3)CCC2
2101615	0	C=C1C(=O)O[C@@H]2C[C@@H](C)[C@@H]3C=CC(=O)[C@@]3(C)[C@@H](O)[C@H]12
2102299	1	COC(=O)Cc1[nH]n(-c2nc3ccccc3s2)c(=O)c1C(C)=Nc1ccc(OC)cc1
2102349	0	COc1ccc(-c2[nH]ncc2-c2ccc3c(c2)OCCO3)c(O)c1
2102472	0	CCc1ccc2[nH]c3nc(N/N=C/c4cccc(O)c4)nnc3c2c1
2103651	0	CC(=O)Nc1sc2c(c1-c1nc3ccccc3s1)CCN(C(C)C)C2.Cl
2104373	0	Cc1cc(NC(c2ccc(Cl)cc2)c2ccc3cccnc3c2O)no1
2106159	1	CCN(CC)S(=O)(=O)c1ccc(N/N=C/c2ccc(O)cc2O)nc1
2108764	0	Nc1ncnc(N2CCc3ccccc32)c1[N+](=O)[O-]
2109084	0	CNc1ccc2ncc(-c3cccc(C(=O)N(C)C)c3)n2n1
2110030	1	COc1ccc(-n2c(C)c(C(C)=O)c3cc(OC(C)=O)ccc32)cc1
2110271	0	Cc1cc(N2CCOCC2)c2c(N)c(Br)cc(C)c2n1
2111906	1	Cc1cc(=O)[nH]c(N/N=C/c2cc(C)n(CC(F)(F)F)c2C)n1
2113280	0	S=c1[nH]nc(C2CCCCC2)n1/N=C/c1ccncc1
2114295	1	CNc1ccc2ncc(-c3ccc(OC)c(OC)c3)n2n1
2114988	0	CN(Cc1c(C(=O)N/N=C/c2ccccc2O)nnn1-c1nonc1N)C1CCCCC1
2116204	0	Clc1ccccc1C1=Nn2c(nnc2-c2ccncc2)SC1
2116208	0	Oc1ccc2ccccc2c1N=Nc1nccs1
2116584	0	c1ccc(CNc2c3ccccc3nc3ccccc23)cc1
2117532	0	CCN(CC)Cc1c(O)ccc2c([N+](=O)[O-])c(C)n(-c3ccc(OC)cc3)c12
2117968	0	CC1CCc2c(sc(NC(=O)c3cccs3)c2C(=O)O)C1
2118660	1	Cc1nn(Cc2ccc(Cl)cc2)c(C)c1NC(=O)c1cc(-c2ccc3c(c2)OCO3)on1
2122091	0	CCOc1ccc(Nc2ncnc3ccc([N+](=O)[O-])cc23)cc1
2122118	0	COc1ccc(OC)c(/C=C/c2ccnc3ccccc23)c1
2122192	1	CC(C)CC(=O)/C(=C\c1ccc(Cl)cc1Cl)n1cncn1
2123428	0	O=C1CN=C(c2ccc[nH]2)c2cc(Cl)ccc2N1
2123828	0	N=c1c2c(-c3ccccc3)c(-c3ccccc3)n(Cc3ccco3)c2ncn1CCCn1ccnc1
2124953	0	O=c1[nH]c(=O)n(C2OC(CO)C(O)C2O)cc1F
2125848	0	CC1CCN(Cc2c(C(=O)N/N=C/c3ccccc3O)nnn2-c2nonc2N)CC1
2125956	0	COc1ccc(-n2c(C)c(C(C)=O)c3cc(O)ccc32)cc1
2126160	0	C/C(=N\Nc1ccc2nncn2n1)c1ccccn1
2126594	0	COc1ccc(C(=O)CN2C(=O)c3ccccc3S2(=O)=O)cc1
2127262	0	c1ccc2c(-c3ccc4nncn4c3)cncc2c1
2128618	0	N#CC(C#N)=NNc1ccc(-n2ccc(C(F)(F)F)n2)cc1
2128937	0	Cn1c(/C=C/c2ccc(Cl)cc2Cl)c([N+](=O)[O-])c(=O)n(C)c1=O
2129703	0	CC(=O)OC1CC2C(C)(C)C(=O)C=CC2(C)C2CCC3(C)C(c4ccoc4)OC(=O)C4OC43C12C
2133777	0	C[C@H]1CCC[C@@H](O)CCC/C=C/c2cc(O)cc(O)c2C(=O)O1
2133840	0	Nc1ccc(-c2cnc(N)c(C(=O)c3cccnc3)n2)cn1.O=C(O)C(F)(F)F
2134372	1	CCCCC(=O)NC(c1ccc(N(C)C)cc1)c1ccc2cccnc2c1O
2139165	1	CC1=C(C(=O)OCc2ccc3c(c2)OCO3)C(c2ccccc2)NC(=O)N1
2140576	1	Cc1nnsc1C(=O)N/N=C/c1ccc2ccccc2c1O
2148671	0	CC(/C=C1\SC(=O)N(CCCC(=O)O)C1=O)=C\c1ccccc1
2150445	0	COC(=O)[C@]12OC[C@]34C([C@@H](O)[C@@H]1O)[C@]1(C)CC(=O)C(O)=C(C)[C@@H]1C[C@H]3OC(=O)[C@H](O)[C@@H]24
2151528	1	C(C#CCCCCCCCCC[n+]1ccccc1)#CCCCCCCCCC[n+]1ccccc1.Cc1ccc(S(=O)(=O)[O-])cc1
2151914	0	Cl.O=C1/C(=C/c2ccccc2)C[C@@]2(O)[C@H]3Cc4ccc(O)c5c4[C@@]2(CCN3CC2CC2)C1O5
2151983	0	O=C(N/N=C/c1sc(N2CCOCC2)nc1-c1ccccc1)c1cccc(S(=O)(=O)N2CCCC2)c1
2152026	1	O=[N+]([O-])c1ccc(NC(c2ccccc2)c2ccc3cccnc3c2O)cc1
2152178	0	CCCCC(=O)NC(c1ccc(N(CC)CC)cc1)c1ccc2cccnc2c1O
2152263	0	Cc1ccc(NC(=O)c2cc3ccccc3oc2=O)cc1S(=O)(=O)N(C)C
2155055	0	Cl.N=c1c2c(n(Cc3ccc(Cl)cc3Cl)c3c1CCC3)CCCC2
2155253	0	CC(C)(C)c1nnc(N/N=C/c2cc(Br)ccc2O)n(N)c1=O
2156570	0	N=c1c2c(-c3ccccc3)c(-c3ccccc3)n(Cc3ccccc3)c2ncn1CCCn1ccnc1
2161148	0	CC(=O)Nc1nc(-c2ccc3c(c2)CC(C)N3C(=O)C2CC2)c(C)s1
2162626	1	Cc1nnc(-c2ccccc2)c(=O)n1/N=C/c1c(O)ccc2ccccc12
2162753	0	CCOC(=O)c1ccc2c(c1)n(CC)c(/C=C/N(C)c1ccccc1)[n+]2CC.[I-]
2162790	0	O=C1C(F)=CC(COC(c2ccccc2)(c2ccccc2)c2ccccc2)OC1n1cc(F)c(=O)[nH]c1=O
2162991	0	CC(=NNC(=S)N1CCCC1)c1ccccn1
2166356	1	CCCCC(=O)NC(c1ccc(C(C)C)cc1)c1ccc2cccnc2c1O
2166675	1	CCN(CC)c1ccc(/C=N/NC(=O)c2nnn(-c3nonc3N)c2C(C)C)c(O)c1
2167979	1	O=C(CN1C(=O)c2ccccc2S1(=O)=O)N1CCc2ccccc21
2169532	0	O=C(NC1CCCCC1)C(c1cccnc1)N(C(=O)CCl)c1ccc(F)cc1
2175947	1	O=C(/C=C/c1ccc(Cl)cc1)NC(=S)Nc1ccc(NC(=O)c2ccco2)cc1
2178859	0	Cl.O=[N+]([O-])c1ccc2ncnc(N3CCN(Cc4ccc5c(c4)OCO5)CC3)c2c1
2185628	0	O=C(Nc1nc(-c2ccccc2)cs1)c1ccc(N2CCOCC2)c([N+](=O)[O-])c1
2186086	0	Cc1cc(=O)[nH]c(NN=Cc2cc(Br)ccc2O)n1
2187558	0	COc1ccc(C[C@H]2COC(=O)[C@@H]2Cc2ccc(OC3OC(CO)C(O)C(O)C3O)c(OC)c2)cc1OC
2189877	0	O=C(Nc1nc(-c2ccccc2)cs1)c1ccc2c(=O)n3c(nc2c1)CCCCC3
2190946	0	C[n+]1cc2c3c(ccc2c2ccc4cc5c(cc4c21)OCO5)OCO3
2192078	0	C=C1C(=O)O[C@@H]2C[C@@H](C)[C@@H]3C=CC(=O)[C@@]3(C)[C@@H](OC(C)=O)[C@H]12
2192241	0	COc1cc(/C=C2\COC/C(=C\c3cc(OC)c(OC)c(OC)c3)C2=O)cc(OC)c1OC
2192714	0	C[N+]1=C2C=CC=CC=C2SC12C([N+](=O)[O-])=CC(=[N+]([O-])[O-])C=C2[N+](=O)[O-]
2193089	0	COc1ccc(CCNc2c3ccccc3nc3ccccc23)cc1OC.Cl
2193280	0	Cc1sc(NC(=O)c2ccco2)c(C(c2cccnc2)N2CCC(C)CC2)c1C
2197921	0	COc1cccc(/C=N/NC(=O)c2cc3c(OC)cccc3[nH]2)c1O
2198525	1	COc1ccc(-c2noc(CCCC(=O)O)n2)cc1
2200281	0	CCCNC(=O)C1(C)CCCN(Cc2cccc(C#N)c2)C1
2202139	0	CCCn1ncc(/C=N/O)c1C
2202737	1	Cc1cccc(C)c1-n1nnnc1C(c1cc2ccccc2o1)N1CCC(n2c(=O)[nH]c3ccccc32)CC1
2203667	0	O=C(Nc1ccc(Cl)c(Cl)c1)c1cccc(S(=O)(=O)NCc2cccnc2)c1
2204429	0	Cc1sc(NC(=O)Cc2ccc3c(c2)OCO3)nc1-c1ccc2c(c1)CCN2C(=O)c1ccc(F)cc1
2204911	1	Cc1cccc(Nc2ncnc3ccc(Br)cc23)c1
2205478	0	CCN(CC)CCC(=O)Nc1cccc2c1C(=O)c1ccccc1C2=O.Cl
2205572	1	Cc1ccc2nc(-c3ccncc3)c(NC3CCCC3)n2c1
2206549	0	COc1ccc(CN2CCN(C(=O)c3ccc(S(=O)(=O)N4CCCCCC4)cc3)CC2)cc1
2207528	1	COc1cccc(CNc2nc3cc(-c4ccsc4)sc3c(=O)n2C)c1OC
2210633	1	COC(=O)C1=C(c2ccc(-c3ccccc3)c(F)c2)C[C@@H]2CC[C@H]1N2C(=O)NC1CC1
2211281	1	CCCc1c(C)nc2ccccc2c1SCCC#N
2211303	0	O=c1[nH]c2ccccc2n1C1CCN(C(c2cccs2)c2nnnn2-c2ccc3c(c2)OCCO3)CC1
2212582	0	CC(=O)c1ccc(S(=O)(=O)N2CCN(CCOc3ccc(Br)cc3)CC2)cc1
2212798	0	CCOC(=O)C1=C(c2ccc(OC)cc2)C(=O)c2ccccc2C1=O
2214004	1	N#Cc1c(NC(=O)CSc2ncn[nH]2)sc2c1CCCC2
2215518	0	Cc1cc(C2=NNC(=NC3CC3)SC2)c(C)n1Cc1ccco1
2218471	0	O=C(COC(=O)c1ccc[nH]c1=O)Nc1ccc(N2CCCCC2)cc1
2218973	0	CN1C(=O)[C@@]23C[C@]4(c5c[nH]c6ccccc56)c5ccccc5N(S(=O)(=O)c5ccccc5)[C@@H]4N2C(=O)[C@@H]1SS3
2219634	0	C=CC[n+]1c(-c2ccc(C)cc2)csc1Nc1ccc(NC(C)=O)cc1.[Br-]
2219678	0	O=C(c1cncc(Br)c1)N1CCc2ccccc2C1
2220183	0	COc1ccc([C@H]2CC(=O)C=C(c3ccnc4ccc(Cl)cc34)C2)cc1
2220729	0	O=C(COc1ccccc1O)NNc1ccccc1
2221702	0	Cc1ccccc1Cn1c(C)nc2ccccc21
2221957	1	CC(C)(C)NC(=O)C(c1ccncc1)N(Cc1cccs1)C(=O)Cn1nnc(-c2ccc(F)cc2)n1
2223155	1	CCOC(=O)N1CCC(Nc2ncnc3c2cnn3-c2ccc(C)cc2C)CC1
2223179	0	CCN(CC)c1ccc(/C=N/NC(=O)CCC(=O)NCc2ccccc2)c(O)c1
2223265	0	Cc1ccc(C(=O)O/N=C(\N)c2ccccn2)c(C)c1
2224379	1	Cn1c(/C(C#N)=C/c2ccc(-c3ccc(S(N)(=O)=O)cc3)o2)nc2ccccc21
2224947	0	OC[C@@H]1CN(Cc2ccc(-c3ccccc3)cc2)C[C@H](n2cnc3c(NCc4ccncc4)ncnc32)O1
2225578	0	CCc1nc(Cl)c(C#N)c2c1CCCC2
2227937	0	Cc1nc(N)c(CC(Br)CBr)c(Cl)n1
2228594	0	O=S(=O)(NCc1ccncc1)c1ccc(Br)s1
2229088	0	CCN(CC)S(=O)(=O)c1ccc(/C=C/C(=O)Nc2ccc(F)c(F)c2F)cc1
2230025	0	Cc1ccc(-c2n[nH]c(=S)n2/N=C/c2ccncc2)cc1
2230326	0	CCOC(=O)C(=Cc1ccccc1)C(=O)c1ccccc1
2231319	0	Cn1c(/C=C/c2ccc(Cl)cc2)c([N+](=O)[O-])c(=O)n(C)c1=O
2232224	0	CC[n+]1c(/C=C/Nc2ccccc2)oc2ccccc21.[I-]
2233014	0	CS(=O)(=O)N(CCC#N)Cc1ccc(/C=C2\C(=O)Nc3ccccc32)o1
2233895	0	CCOC(=O)Cc1csc(SCC(=O)c2c(N)n(CC(C)C)c(=O)n(C)c2=O)n1
2234647	0	COc1ccc(-c2c[n+]3c(n2-c2ccccc2)CCCCC3)cc1.[Br-]
2235425	0	CN(Cc1ccccc1)c1ncnc(N)c1[N+](=O)[O-]
2235477	0	Cc1cc(C)c2nc(NNC(=O)c3ccc(S(=O)(=O)N4CCc5ccccc5C4)cc3)sc2c1
2236092	0	CNC(=O)c1ccc(NC(=O)C2CCN(c3ncnc4sc(C)c(C)c34)CC2)cc1
2238454	0	Cc1ccc(S(=O)(=O)N(C)c2ccc(C(=O)N3CCN(Cc4ccc5c(c4)OCO5)CC3)cc2)cc1
2239463	1	COc1cccc(-c2ccc3ncnc(NCc4ccc5c(c4)OCO5)c3c2)c1
2239932	1	COc1ccc(-c2cn[nH]c2-c2ccc(OC)cc2O)cc1
2240759	1	CCCN(CCC)c1nc(-c2ccccn2)nc2ccccc12
2242454	0	Nc1ncnc(NCc2ccc(F)cc2)c1[N+](=O)[O-]
2242946	0	Oc1c(C(Nc2nc3ccccc3s2)c2ccco2)ccc2cccnc12
2246764	0	COc1cccc(/C=N/NC(=O)c2cc3c(OC)ccc(OC)c3[nH]2)c1O
2247934	0	Cc1sc2ncnc(N3CCC(C(=O)Nc4ccccc4C(C)(C)C)CC3)c2c1C
2250400	0	CC(=O)NC(c1ccc(C)cc1)c1cc(Cl)c2cccnc2c1O
2255011	0	CN(C(=O)COC(=O)/C=C/c1cccc([N+](=O)[O-])c1)C1CCS(=O)(=O)C1
2259110	0	COCCNC(=O)c1c[nH]c2ccc(S(=O)(=O)N3CCc4ccccc43)cc2c1=O
2260658	1	COc1ccc(N/N=C(\C#N)C(=N)SCc2ccccc2)cc1
2262864	0	c1ccc(CC2CCN(c3ncnc4sccc34)CC2)cc1
2279440	1	CCSCCc1nnc(NC(=O)Nc2cccc(C(F)(F)F)c2)s1
2289022	0	Cc1ccc(N(CCC#N)C(=O)CCl)cc1C
2291702	0	Cc1ccc(C(=O)NC2CCCc3c2cnn3-c2ccc(F)cc2F)cn1
2294766	0	CC(=O)NC(c1ccccc1)c1cc(Cl)c2cccnc2c1O
2302047	1	Cc1cc(=O)[nH]c(Nc2cccc(C(F)(F)F)c2)n1
2306089	0	Brc1cccc(CSc2nnc(-c3ccncc3)o2)c1
2307751	1	CC(=O)N(C(C)=O)c1ncc2c([nH]c3ccccc32)c1C#N
2309197	0	CSc1ccc(CN2CCN(Cc3ccc([N+](=O)[O-])cc3)CC2)cc1.O=C(O)C(=O)O
2312594	1	CCCCNc1nc2c(c(=O)n(C)c(=O)n2C)n1Cc1cccc(OC)c1
2314215	1	CC1CCc2c(sc3ncnc(N4CCOCC4)c23)C1
2317988	0	COc1ccccc1C(NC(C)=O)c1cc(Cl)c2cccnc2c1O
2318546	1	Cc1nc(N)c(C#N)c(-c2cccnc2)c1C
2318818	1	CCOC(=O)c1cccc(NS(=O)(=O)c2ccc(NC(C)=O)cc2)c1
2319604	0	CC(C)(C)c1cc(/C=N/O)cc(C(C)(C)C)c1O
2321976	0	COc1ccc(-c2cc(=O)oc3c(C)c(O)ccc23)cc1
2322061	0	COc1cccc(-c2nnc3sc(C4CCCCC4)nn23)c1
2323706	1	COc1ccc(Nc2ccnc3ccccc23)cc1.Cl
2326513	0	CC(C)(C)NC(=O)CSc1nc2ccc(NC(=O)CSc3nnnn3Cc3ccccc3)cc2s1
2326905	0	CN(Cc1cccnc1)C(=O)c1cc(COc2ccc3ncccc3c2)on1
2328694	1	CN1C(=O)[C@H](Cc2ccc([N+](=O)[O-])cc2)NC1=S
2328849	0	CC(=O)N1CCN(c2ncnc3ccccc23)CC1
2329643	0	Nc1nccc(-c2ccc(-n3cnc4ccccc43)cc2)n1
2330223	1	COc1cccc(NC(=O)CN(C)CC(=O)Nc2ccc(C)c([N+](=O)[O-])c2)c1
2330235	0	C=CCSc1nsc(NC(=O)Nc2cccc(C(C)=O)c2)n1
2330660	0	O=C(Nc1ccncc1)c1cccc(S(=O)(=O)N2CCc3ccccc32)c1
2332199	1	COc1cc(NC(=O)c2cccc3c(-c4cccnc4)coc23)cc(OC)c1OC
2332535	1	COc1ccc(CNC(=O)c2ccc(N3CCC4(CC3)CC(c3ccc(Cl)cc3)=NO4)c([N+](=O)[O-])c2)cc1
2336086	0	CCn1ccnc1CN(C)Cc1cn[nH]c1-c1ccc(OC)c(F)c1
2336182	0	c1ccc2c(-c3cncc4ccccc34)cncc2c1
2336835	1	Nc1c(Cl)ncnc1NCCc1ccc(O)cc1
2342756	0	Cc1ccc(C(C)C)c(OCc2ccc(C(=O)N/N=C/c3cccc(O)c3O)cc2)c1
2343076	0	COC(=O)c1c(C)oc2ccc(N(C(=O)c3ccncc3)S(=O)(=O)c3ccc(C)cc3C)cc12
2343643	0	COc1ccc(CCC(=O)Nc2ccc(Cl)c(S(=O)(=O)N3CCCC3)c2)cc1
2344311	1	CC(=O)Nc1ccc(OCC(=O)Nc2ccc(Cl)c(S(=O)(=O)N3CCOCC3)c2)cc1
2347030	0	COc1ccc(-n2cc(-c3ccccc3)[n+]3c2CCCCC3)cc1.[Br-]
2347431	0	Cc1sc2ncn3ncnc3c2c1C
2348147	0	COc1ccc(-c2cn[nH]c2-c2ccc(OCc3ccc([N+](=O)[O-])cc3)cc2O)cc1
2349797	1	Clc1cncc(Cl)c1N/N=C/c1ccncc1
2349949	0	Cc1oc(-c2ccc(Cl)cc2)nc1CS(=O)CC(=O)NCCCN1CCN(Cc2ccccc2)CC1
2351493	1	Cc1c(-c2ccccc2)oc2c(C(=O)N3CCN(c4ccc([N+](=O)[O-])cc4)CC3)cccc2c1=O
2352818	0	CN(C)c1ccc(/C=C/c2nc3ccccc3s2)cc1
2355337	0	O=C(O)CCCN1C(=O)/C(=C\c2ccco2)SC1=S
2357494	0	COC(=O)[C@@H]1[C@@H](C(=O)OC)C2(c3ccccc3-c3ccccc32)N(c2ccc(Cl)cc2)N1C#N
2358005	0	O=S(=O)(/C=C/C=C/S(=O)(=O)c1ccccc1)c1ccccc1
2359311	0	C[C@H]1CCC/C=C/C(=O)c2c(O)cc(O)cc2CC(=O)O1
2361547	1	Cc1cc(C(=O)CN2C(=O)c3ccccc3S2(=O)=O)c(C)n1C(C)C
2366523	0	O=C(CCCc1ccccc1)c1ccc2c(c1)OCCO2
2367182	0	O=C(COC(=O)CCN1C(=O)/C(=C\C=C\c2ccccc2)SC1=S)Nc1cc(F)ccc1F
2368087	0	Cc1cc(S(=O)(=O)c2ccc(Cl)cc2)nc(S(=O)(=O)c2ccc(Cl)cc2)c1C#N
2368804	1	Cc1ccccc1C(=O)N/N=C/c1ccc([N+](=O)[O-])s1
2369164	0	N#Cc1cc2c(nc1SCC(=O)N1CCOCC1)CCCCC2
2370102	1	Nc1ccc(Br)cc1C(=O)O
2370425	0	Cc1ccc2nc(-c3ccc4c(c3)OCCO4)cn2c1
2372624	0	CN(C)c1ccc(C=c2c3cc([N+](=O)[O-])ccc3n3c2cc(-c2ccccc2)[n+]3C)cc1.O=S(=O)([O-])C(F)(F)F
2374706	1	O=C(OC(c1ccccc1)c1nccc2ccccc12)c1ccccc1
2377706	0	CCS(=O)(=O)c1ncc(Cl)c(C(=O)Nc2ccc(S(=O)(=O)N3CCC(C)CC3)cc2)n1
2380628	1	COc1cccc2c(NCc3ccccc3)nc(-n3c(N)nc4ccccc43)nc12
2382050	0	CC(C)n1cc(/C=C/c2cc[n+](C)cc2)c2ccccc21.[I-]
2386027	0	O=C(Nc1ccc(Cn2cccn2)cc1)c1ccc(COc2cccc(Br)c2)cc1
2387611	0	Cc1ccc2nc(C)c3c(c2c1)N(c1ccc(F)cc1)CC3
2387818	1	COc1ccc(CNC(=O)c2cccc(S(=O)(=O)N3CCCCC3)c2)cc1OC
2388528	0	CCn1c(Oc2ccccc2C)nc2c1c(=O)n(C)c(=O)n2C
2390020	0	COc1cncc(-c2cnc3sc(NCCc4ccccn4)nn23)c1
2393027	0	O=Cc1cn(Cc2cccc([N+](=O)[O-])c2)c2ccccc12
2395136	0	c1ccc2c(-c3cccc4nccn34)cncc2c1
2397406	1	COc1ccc(NC(=O)/C(C#N)=C\c2cc(C)n(-c3ccc4c(c3)OCO4)c2C)cc1
2397695	0	O=C(Nc1ccc2c(c1)OCCO2)C(c1ccnc2ccccc12)N1CCN(c2ccc(C(F)(F)F)cn2)CC1
2400243	1	CC(=O)c1cccc(-c2csc3ncnc(Sc4nnnn4C)c23)c1
2401486	1	COc1cccc(OCCn2cc(C(C)=O)c3ccccc32)c1
2402326	1	COc1ccc(-c2csc(NC(=O)c3ccccc3NS(=O)(=O)c3ccc(C)cc3)n2)cc1
2403508	0	CCOC(=O)c1ccc(NC(=O)c2ccc(CN3CCc4ccccc4C3)cc2)cc1
2404411	0	CCCCCN1C=CC(=C2C(=O)c3ccccc3C2=O)C=C1
2404824	0	CCn1c(Cl)c(C=O)s/c1=N\S(=O)(=O)c1ccccc1
2405293	0	COc1ccc2c(c1)sc1nc(-c3ccccc3)cn12
2405728	0	C=C(C(=O)c1ccccc1)C(C)C(=C)C(=O)c1ccccc1
2405889	1	CC(C)(C)c1ccc(Oc2ccc(NC(=O)c3ccccc3C(=O)O)cn2)cc1
2408873	0	O=c1oc2ccccc2cc1-c1cn(-c2ccccc2)c(=S)[nH]1
2409536	0	Cc1sc(NC(=O)CCCC(=O)O)c(C(N)=O)c1-c1ccccc1
2409986	1	Cc1c([N+](=O)[O-])c2ccc(O)cc2n1-c1ccccc1
2410811	0	OC1c2cc(Br)ccc2N=C2CCCN21
2412068	0	Cc1cc(C)nc(/N=C(\N)Nc2ccc(-c3ccccc3)cc2)n1
2412986	0	Cc1cc(C)c2nc(NNC(=O)c3ccc(S(=O)(=O)N4CC(C)CC(C)C4)cc3)sc2c1
2414087	1	Cc1nn(C(C)(C)C)c(C)c1/C=N/OC(=O)Nc1ccc(Cl)c(Cl)c1
2423054	0	O=C(Nc1nc2cc3c(cc2s1)OCCO3)C1=COCCO1
2423420	0	N#Cc1ccccc1COc1ccc(/C=C/C(=O)O)cc1
2423474	0	CN1C2CCC1/C(=C/c1ccccn1)C(=O)/C2=C\c1ccccn1
2424149	0	Cc1ccc2nc(NC(=O)CSCC(=O)OCC(=O)c3ccc(Br)cc3)sc2c1
2425463	0	CCCCN1C=CC(=C2C(=O)c3ccccc3C2=O)C=C1
2425634	0	O=S(=O)(/C(=C/c1ccc(C(F)(F)F)cc1)c1nc2ccccc2[nH]1)c1ccccc1
2426360	1	O=C(CCl)Nc1ccc(C(=O)NCC2COc3ccccc3O2)cc1
2427072	0	CCOc1ccc(-c2noc(CCC(=O)O)n2)cc1
2429550	0	O=C1/C(=C/c2ccncc2)CCC/C1=C\c1ccncc1
2431180	0	C(=Cc1cnc2ccccc2n1)c1ccc2c(c1)OCO2
2432464	0	CN(c1ccc2nc3ccccc3c(=O)n2n1)C1CCCCC1
2433287	0	NC(=O)c1cc([N+](=O)[O-])ccc1NCc1ccc(N)cc1
2434155	0	COCCn1c(C)cc(C(=O)COC(=O)c2cccc(O)c2)c1C
2434777	0	CCc1ccc(/C=C2\SC(=S)N(CCCC(=O)NCCCN3CCOCC3)C2=O)cc1
2435336	0	C=CCN=C1NN=C(c2cc(C)n(CCOC)c2C)CS1.Cl
2438419	0	C(=N/Nc1nc2ccccc2s1)\c1ccccn1
2438769	0	Cc1ccoc1C(=O)Nc1ccc(CC(=O)O)cc1
2439674	0	Cc1cc(C2=NNC(=NC3CC3)SC2)c(C)n1-c1ccccc1
2440943	0	C=C1C(=O)[C@]23C[C@H]1CC[C@H]2[C@]1(C)CCC[C@@](C)(C(=O)OC)[C@H]1C[C@@H]3O
2441116	0	Nc1ccc(-c2ncc(-c3ccccc3)o2)cc1
2441134	0	COc1ccc2c(c1)/C(=C\c1cccc(/C=C3/C(=O)Nc4ccc(OC)cc43)n1)C(=O)N2
2443356	0	CC(=C\c1ccccc1)/C=C1/SC(=S)N(CCCC(=O)O)C1=O
2443590	0	CCCOc1ccc(/C=N/NC(=S)Nc2ccccc2[N+](=O)[O-])c(O)c1
2444453	0	Cl.OCCN(CCO)CC(O)COc1ccc(C23CC4CC(CC(C4)C2)C3)cc1
2444994	0	Cc1ccc(NC(=O)c2cc(C)n(-c3ccccc3)c2C)cc1
2445782	0	O=Cc1s/c(=N\S(=O)(=O)c2ccccc2)n(CCCCl)c1Cl
2446553	0	Cc1cc(C(=O)CSc2ccc(F)cc2)cc(C)c1OC(=S)N(C)C
2448286	0	Cc1scc(C(=O)N/N=C/c2ccc([N+](=O)[O-])o2)c1C
2448681	0	Nc1ccc(-c2nc3c(Cl)cc(N)cc3[nH]2)cc1
2449454	0	O=C(O)CCCc1ccc2c(c1)CCc1ccccc1-2
2449575	0	CC(C)(C)c1ccc(-c2noc(CCC(=O)Nc3cccnc3)n2)cc1
2452200	0	Cc1c(CCC(=O)O)c(=O)oc2cc3oc4c(c3cc12)CCCC4
2452505	0	CC(C)(C)n1ncc2c(=O)n(CC(=O)OCc3ccccc3)cnc21
2452652	0	C[C@@H]1C[C@@H]2O[C@H]2CCCCC(=O)Cc2cc(O)cc(O)c2C(=O)O1
2455255	0	CC(C)(C)c1ccc(Oc2ccc(N)cn2)cc1
2457290	0	O=C(Nc1ccc2nc3n(c(=O)c2c1)CCCCC3)c1c(F)ccc([N+](=O)[O-])c1F
2457693	0	Cc1ccc(C(=O)c2cccc(N)c2)cc1C
2459292	1	COc1cc(OC)c2nc(C)c3c(c2c1)N(c1ccc(O)cc1)CC3
2459710	0	Cc1c(CC(=O)NCCCC(=O)O)c(=O)oc2cc3c(cc12)CCC(C)(C)O3
2461136	1	CCc1ccc(-c2nnn(CCC(=O)OC)n2)cc1
2461800	0	O=C(c1ccncc1)c1ccc(N2CCN(C3CC(=O)N(Cc4cccs4)C3=O)CC2)cc1
2463081	0	O=C(c1cccs1)C1CCN(c2ncnc3sccc23)CC1
2463109	0	O=C(c1ccc(Cl)cc1)C1CCCN(Cc2cccc3ncccc23)C1
2464572	1	COc1cc2c(cc1OC)C(c1c(Cl)cccc1Cl)=NCC2
2464730	0	c1ccc2cc3[nH]c(CNc4nc(N5CCOCC5)nc5c4ncn5-c4ccsc4)nc3cc2c1
2465038	0	C=CCN=c1scc(-c2ccc3c(c2)NC(=O)CO3)n1/N=C(\C)c1ccccn1
2465549	0	Cc1c(CCC(=O)N2CCC(C(=O)O)CC2)c(=O)oc2cc3oc4c(c3cc12)CCCC4
2465861	0	CC(C)COc1ccc(C/C(N)=N/n2cnnc2)cc1
2466285	0	CCn1c(SCC(=O)c2[nH]c(C)c(C(C)=O)c2C)nnc1-c1cccs1
2466717	0	Cc1ccccc1CS(=O)(=O)Cc1ccc(C(=O)Nc2ccc(F)cc2)o1
2467166	0	COc1ccc(CCN(C)C(=O)c2cccc(S(=O)(=O)N3CCN(c4ccc(F)cc4)CC3)c2)cc1OC
2468789	0	Cc1ccc(NC(=O)c2ccc(Nc3c([N+](=O)[O-])cc([N+](=O)[O-])cc3[N+](=O)[O-])cc2)cc1
2471183	0	Cc1ccc(Cl)cc1N1CCN(C(=O)CN(C2CCCCC2)S(C)(=O)=O)CC1
2472113	0	Cc1oc(-c2ccc(Cl)cc2)nc1CN1CCCC(C(=O)NCc2cccnc2)C1
2475269	0	Cc1ccc(NCC(=O)Nc2cccc(S(=O)(=O)N(C)C)c2)cc1S(=O)(=O)N1CCCCCC1
2475524	0	COc1ccc(C(=O)N2CCN(c3ccc([N+](=O)[O-])c(NCCc4ccc(OC)c(OC)c4)c3)CC2)cc1
2476398	0	COC(=O)CCCNC(=O)CCc1nnc(-c2ccc(-c3ccccc3)cc2)o1
2477145	0	COc1ccc(/C=C2/SC(=S)N(CCC(=O)O)C2=O)cc1
2478568	0	Cc1ccc(/C=C2\SC(=S)N(CCCC(=O)NC3CCCC3)C2=O)cc1
2479901	0	CCOC(=O)N1CCC(NC(=O)c2ccc3c(c2)N(C)C(=O)/C(=C/c2cccc(OC)c2)S3)CC1
2483332	1	CC(=O)c1cccc(NS(=O)(=O)c2ccc(C(=O)Nc3ccccc3)cc2)c1
2486780	1	O=C(OC12CCCN(C1)/C(=C/c1ccncc1)C2)c1ccccc1
2488460	0	CCSc1nc2ccccc2n1C(=O)/C=C/c1ccc(OC)c(OC)c1
2488617	0	O=C(Nc1ccc(Oc2ccccc2)cc1)C1CCCN1S(=O)(=O)c1cccc2cccnc12
2489975	0	COc1ccccc1-c1cc2nc(-c3ccccc3)cc(N3CCN(C(=O)c4ccco4)CC3)n2n1
2494393	0	Cc1ccc(NC(=O)C2CCN(S(=O)(=O)c3ccc4c(c3)NC(=O)C(C)S4)CC2)cc1Cl
2494827	0	Cc1[nH]nc(C(F)(F)F)c1N=NN1CCOCC1
2499898	0	Clc1ccc(CN2CCN(N=Cc3ccncc3)CC2)cc1
2507867	0	COc1cc(/C=C2\COC/C(=C\c3ccc(O)c(OC)c3)C2=O)ccc1O
2514699	0	O=C(Nc1ccc(CN2CCS(=O)(=O)CC2)cc1)c1ccc(C(F)(F)F)cc1
2520263	0	CCn1c(SCc2ccc(Cl)cc2)nnc1-c1cnn(-c2ccccc2)c1C(F)(F)F
2520863	0	CC(=O)Nc1ccc(SCC(=O)c2cc(C)n(Cc3cccs3)c2C)cc1
2522096	0	Cc1nc2ncnn2c(N2CCN(c3cccc(C(F)(F)F)c3)CC2)c1C
2523069	0	COc1ccccc1OCc1ccc(C(=O)Nc2ccncc2)o1
2523900	0	COc1cc(CNc2ncnc3c2ncn3[C@H]2CN(Cc3ccc(-c4ccccc4)cc3)C[C@@H](CO)O2)cc(OC)c1OC
2524412	1	CNC(=O)c1cccn(Cc2ccc(C(F)(F)F)cc2)c1=O
2524440	0	S=C(Nc1ccc(Br)cc1)Nc1ccc2c(c1)OCCO2
2524461	1	COc1ccc(-c2cc3ccccc3oc2=O)cc1NC(=O)c1ccc([N+](=O)[O-])o1
2524772	0	N#CC(C#N)=C(Nc1ccc(F)cc1)SCc1cccc(Br)c1
2525677	0	Cc1cc(C)nc(/N=C(\N)Nc2ccc(OCc3ccccc3)cc2)n1
2526458	0	O=C(Nc1ccc(N2CCOCC2)c(Cl)c1)c1ccc([N+](=O)[O-])o1
2526930	0	Cc1ccc(Oc2ccccc2NC(=O)CSCC(=O)Nc2cc(C)on2)cc1
2527216	0	COc1ccc2c(c1)c(C(C)=O)c(C)n2CCc1ccccc1
2534340	0	O=C(c1cc(COc2ccc3ncccc3c2)on1)N1CCCCCC1
2535610	0	COc1ccc(OC)c(NC(=O)c2cc(-c3cc(F)ccc3OCC3CCCO3)n[nH]2)c1
2535819	0	CCOc1cc(CNCc2ccncc2)cc(Br)c1OCc1ccc(F)cc1.Cl
2536570	0	Cn1c(SCC(=O)NCCc2ccccc2)ncc(C(=O)Nc2ccccc2)c1=O
2536883	1	Cc1nn(-c2ccccc2)c(C)c1NC(=O)CCl
2537601	0	CCN1C(=O)c2cccc3c(S(=O)(=O)Nc4ccccc4O)ccc1c23
2537693	1	COc1cc(-c2cc(-c3ccc(O)cc3)nc(N)c2C#N)ccc1O
2537908	1	CCN(CC)S(=O)(=O)c1ccc(N2CCOCC2)c(NC(=O)c2[nH]c(C)c(C(C)=O)c2C)c1
2540242	0	COc1cc(C(=O)NC2CCN(C)CC2)ccc1Nc1ncc2c(n1)N(CCc1ccccc1)CCC(=O)N2C
2541754	1	COC(=O)C(C)Oc1cc(C)cc2oc(=O)c3c(c12)CCC3
2542040	1	COc1cc(C(=O)NC2CCN(C)CC2)ccc1Nc1ncc2c(n1)N(C1CCCCC1)CCC(=O)N2C
2545001	0	c1ccc(C2=Nn3c(nnc3-c3n[nH]c4c3CCC4)SC2)cc1
2546477	0	Cc1ccsc1CNc1ncnc2ccc(-c3c(C)noc3C)cc12
2548270	1	COCCn1c(C)cc(C2=NNC(=Nc3ccccc3)SC2)c1C
2548574	0	Cc1cc(OCC(=O)Nc2nccs2)c2c(C)c(C)c(=O)oc2c1
2550156	0	COc1cc(/C=N/Nc2snc(SC)c2C#N)ccc1O
2550807	0	Cc1ccc(-n2nc(C)c(NC(=O)CCl)c2C)cc1
2550943	0	CC(=O)N1CCc2c(sc(NC(=O)c3ccc([N+](=O)[O-])o3)c2C#N)C1
2551040	0	Cc1nc2cc(NCc3nc4ccccc4n3Cc3ccccc3)ccc2n1C
2552706	0	Cn1c(=O)n(C)c2cc(NC(=O)CCl)ccc21
2554360	0	Cc1ccc(S(=O)(=O)Nc2ccc3c(c2)n(C)c(=O)n3C)cc1
2558548	0	COc1ccc(N=C(NN)c2ccc3ccccc3n2)cc1
2560914	0	O=C(Nc1nc2ccc(F)cc2s1)c1ccc([N+](=O)[O-])o1
2564609	1	CN(CCCC(=O)Nc1ccncc1)S(=O)(=O)c1ccc(Cl)cc1
2564956	0	c1ccc(C(Cc2nc(-c3ccncc3)no2)c2ccccc2)cc1
2565517	0	COc1ccccc1CNc1nc(NCc2ccccc2OC)c2sccc2n1
2565633	0	O=S(=O)(c1ccc2c(c1)OCCO2)N1CCN(c2ncnc3sccc23)CC1
2566411	0	COc1cc(CNCc2ccncc2)cc(Br)c1OCc1ccccc1F.Cl
2569391	0	Cc1ccc(NC(=O)COc2ccc(N(C)C(=O)C(C)(C)C)cc2)cc1S(=O)(=O)N1CCCCC1
2569518	0	CCC(C)(C)c1ccc(OCCCC[n+]2cccc(C)c2)c(C(C)(C)CC)c1.[Br-]
2570042	1	O=C(Nc1ccc(Cl)c(S(=O)(=O)N2CCOCC2)c1)c1ccc(Cl)nc1
2570991	0	COc1ccc(-c2ocnc2C(=O)NCc2nn(-c3ccccc3)nc2C)cc1
2571013	0	CCN(CC)S(=O)(=O)c1ccc(Oc2ccc(S(=O)(=O)N(CC)CC)cc2)cc1
2571054	0	O=C(NCc1cccnc1)c1ccc(-c2ccc(F)c(F)c2)c2ccoc12
2571288	1	Cc1nc(Nc2ncc(C(=O)Nc3c(C)cccc3Cl)s2)cc(N2CCN(CCO)CC2)n1
2571309	0	Cc1cc(C(=O)NC2CCCc3c2cnn3-c2ccc(C(C)(C)C)cc2)nn1C
2572325	0	COc1ccc(-c2nsc3c(N4CCCCC4)ncnc23)cc1
2574158	0	CCOc1ccc(CN2CCN(C(=O)c3cccc4ccccc34)CC2)cc1.O=C(O)C(=O)O
2574593	0	Cc1ccc(CNC(=O)c2cc3c(C)nc4ccccc4c3o2)cc1
2576875	0	C#Cc1ccc(CN2CCC(C(=O)Nc3ccc(Oc4ccccc4)nc3)CC2)cc1
2577847	0	COC(=O)c1cnn(-c2ccc(Cl)cc2)c1/C=N/NC(N)=S
2580339	0	Cc1ccc(-c2c[n+](Cc3cccc(Cl)c3)c3n2CCC3)cc1.[Br-]
2583506	0	CCOC(=O)C1CCN(CC(=O)Nc2c(C(=O)OC)[nH]c3ccc(Cl)cc23)CC1
2583738	0	O=C(CSc1nnc(Cn2nnc3ccccc32)o1)N(Cc1ccc(Cl)cc1)c1ccccc1
2583815	0	COc1cccc(C(C)(O)c2nc(-c3ccc(S(C)(=O)=O)cc3)cs2)c1
2591522	0	Cl.Nc1nonc1C(=O)NCCNCc1cc(Br)ccc1OCc1ccc(F)cc1
2592154	0	COCCNC(=O)N1[C@H]2CC[C@@H]1C(C(=O)OC)=C(c1ccc(-c3ccccc3)c(F)c1)C2
2592745	0	CCN(CC)S(=O)(=O)c1ccc(NC(=O)c2ccc(N(C)S(C)(=O)=O)cc2)cc1
2594965	1	O=C(Nc1cccc(C(F)(F)F)c1)c1ccc2sc([C@H]3C[C@H](O)[C@@H](CO)O3)nc2c1
2595274	0	O=C(c1ccc(CSc2nc3ccncc3[nH]2)cc1)N1CCN(c2cccc(Cl)c2)CC1
2601191	0	COc1ccc(-c2cc(C)no2)cc1S(=O)(=O)N1CCN(c2cccc(C)c2)C(C)C1
2604177	0	CCN(CC)S(=O)(=O)c1cc(NC(=O)C(=O)c2c(-c3ccccc3)cc3ccccn23)ccc1C
2604427	0	CC(C)(O)C#Cc1ccc(C(=O)N2CCN(c3ccc([N+](=O)[O-])cc3)CC2)cc1
2608014	1	CCc1c(-c2ccccc2OC)ncn1Cc1cccc(-c2ccccc2)c1.O=C(O)C(F)(F)F
2610879	0	Cc1ccc(-n2ncc3c2CCCC3NC(=O)c2ocnc2C)cc1C
2616433	0	Cc1cc(N2CCCC2)ccc1NC(=O)COc1cccc(C(F)(F)F)c1
2620992	0	O=C(NC1CCN(Cc2ccccc2)CC1)c1ccc(S(=O)(=O)NCc2ccco2)cc1
2621280	0	O=C(Nc1ccc(Cl)cn1)C1CCN(S(=O)(=O)c2cccs2)CC1
2626966	1	NC(=O)c1ccccc1OCC(=O)N1CCC(Cc2ccccc2)CC1
2628256	0	Cc1cc(=O)[nH]c(SCC(=O)/C=C2\N(C)c3ccccc3C2(C)C)n1
2632827	0	O=C(COc1ccc(C(=O)c2ccccc2)cc1)Nc1cccnc1
2632862	0	O=C(Nc1ccc(S(=O)(=O)NCc2cccnc2)cc1)c1ccccc1Cl
2647474	0	O=C(c1ccccc1)c1ccc(Cn2cc(CCCO)nn2)cc1
2665652	0	COc1cc(OC)c(N(C)S(=O)(=O)c2cccc(C(=O)OCC(=O)c3c[nH]c4ccccc34)c2)cc1Cl
2667330	0	COc1ccc(C2=NS(=O)(=O)N(C)C(C(=O)N3CCc4ccccc4C3)=C2)cc1OC
2672891	0	CCN(CC)S(=O)(=O)c1ccc(N2CCN(c3ccccc3OC)CC2)c(N)c1
2673126	0	CN(CC(=O)Nc1ccccc1Cl)C(=O)c1cccc(S(=O)(=O)N2CCN(c3ccccc3)CC2)c1
2677582	0	NS(=O)(=O)c1ccc(CCNC(=O)c2ccc(Cl)c(S(=O)(=O)N3CCCCCC3)c2)cc1
2695552	0	COC(=O)c1ccc(CN2CCc3ccc(NC(=O)c4ccncc4)cc3C2)cc1
2708830	0	COCCn1c(C)cc(C(=O)COc2nc3ccccc3nc2C)c1C
2723768	1	CC(C)(C)CN1CCN(Cc2nc(-c3ccc(F)cc3)cs2)CC1CCO
2724385	1	CC(Oc1ccc(Br)cc1Cl)C(=O)Nc1ccncc1
2724387	1	CCc1ccc(CNC(=O)c2cc3c(C)nc4ccccc4c3o2)cc1
2725761	0	Cc1ccc(S(=O)(=O)N2CCN(c3ncnc4sccc34)CC2)cc1
2726694	0	COC(=O)[C@]12CCCCC=C1N(Cc1cccc3ccccc13)C(=O)[C@H](CC(=O)NCc1ccc(OC)c(OC)c1)C2
2727244	0	O=C(CNc1cccc(S(=O)(=O)N2CCCC2)c1)Nc1ccc(C(F)(F)F)cc1
2728476	0	C#Cc1ccc(NC(=O)C2(C)CCN2C(=O)Cc2ccc(C(C)C)cc2)cc1
2731123	0	Cc1cccc(Nc2nc(NCc3ccco3)c3ccccc3n2)c1.Cl
2731162	1	O=C(c1ccccc1)C1CCN(c2ncnc3sccc23)CC1
2731806	0	CC(C)(C)c1ccc(S(=O)(=O)N2CCCC(C(=O)N3CCN(Cc4ccccc4)CC3)C2)cc1
2732789	0	COc1ccc(CCNC(=S)N2CCC(C(=O)c3ccc(F)cc3)CC2)cc1OC
2733867	1	Cc1ccc(Cl)cc1S(=O)(=O)N1CCC(C(=O)NC2CCN(Cc3ccccc3)CC2)CC1
2735289	1	O=c1c2ccccc2oc2cc(C#CC3(O)CCCCC3)ccc12
2736527	0	CCc1cc2c(NC3CCCC3)ncnc2s1.Cl
2738595	0	COc1ccc2c(c1)CCCN2C(=O)C1CCCN(S(=O)(=O)c2ccc(C(C)(C)C)cc2)C1
2738599	1	COc1ccc(C(=O)c2ccccc2)c2c(O)ccc(C(=O)c3ccccc3)c12
2738924	0	CCN1/C(=C/c2ccc3cc(C)ccc3[n+]2C)Sc2ccc3sccc3c21.[I-]
2739269	0	CN(Cc1ccccc1)C(=O)c1cccc(NC(=O)Cc2ccc(NC(=O)C3CCN(C(=O)CCc4ccccc4)CC3)cc2)c1
2739435	1	O=C(OC12CCCN(C1)/C(=C/c1ccncc1)C2)c1ccco1
2739954	0	N#CCSc1nnc(-c2sc3ccccc3c2Cl)o1
2740735	0	Nc1cc(S(=O)(=O)c2ccc(N3CCCCC3)c(N)c2)ccc1N1CCCCC1
2740738	0	O=C(Nc1cccc(S(=O)(=O)c2cccc(NC(=O)c3ccco3)c2)c1)c1ccco1
2741354	0	O=Nc1ccc(O)c2ncccc12
2741355	0	O=C(Nc1ccc(N2CCN(c3ncccc3C(F)(F)F)CC2)nc1)c1cccs1
2741775	0	Cc1cc(C(=O)CSc2nnc3ccccn23)c(C)n1-c1ccccc1
2741895	0	CC1CCC2C(=O)N(c3ccc(Cc4ccncc4)cc3)C(=O)C2C1
2742154	0	CCNc1nc2c(c(=O)n(C)c(=O)n2C)n1Cc1ccc(Cl)cc1
2742284	1	COc1ccc(S(=O)(=O)NCc2cccnc2)cc1Br
2742400	1	CC(C)CNc1ncnc2c1ncn2[C@H]1CN(Cc2ccc(-c3ccccc3)cc2)C[C@@H](CO)O1
2742900	0	CN(CCOc1ccc(Cl)cc1)C(=O)c1cccc(S(=O)(=O)N2CCN(c3ccccc3)CC2)c1
2743488	0	COc1ccc(N2CCN(C(=O)CCCCCn3c(=S)[nH]c4ccc(N5CCOCC5)cc4c3=O)CC2)cc1
2745000	0	S=C(NCc1ccc(Cl)cc1)NC1CCN(Cc2ccccc2)CC1
2745456	0	Cc1cccc(NC(=O)CSc2nc3ccccc3c(=O)n2C)c1
2745569	0	COc1ccc(/C=C2\Sc3ccc(C(=O)N4CCN(Cc5ccccc5)CC4)cc3N(C)C2=O)cc1OC
2746548	1	CCC(=O)N1CCN(c2ccc(NC(=O)COc3ccccc3Cl)cc2)CC1
2747063	0	Cc1nc2c(cc1C(=O)/C=C/c1ccc(Br)cc1)CCCC2
2747143	0	CC(Sc1nc2ccccc2c(=O)n1C)C(=O)N(C)C1CCCCC1
2763486	0	CCc1ccc(-c2nc(CN3CCC(C(=O)N4CCN(c5ccccc5)CC4)CC3)c(C)o2)cc1
2763795	1	O=C(C(=O)c1cc(Br)ccc1O)c1cc(Br)ccc1O
2763796	1	CCCCn1c(SCc2ncc(-c3ccccc3)o2)nc2cc(S(N)(=O)=O)ccc21
2764765	0	CCOC(=O)c1c(-c2ccccc2)csc1NC(=O)CSc1nc(N)cc(N)n1
2766984	0	COc1ccc(-c2coc3c(C(=O)NCc4ccc(F)c(F)c4)cccc23)c(C)c1
2768224	0	FC(F)(F)c1cccc(Cc2noc(CN3CCC(c4ccncc4)CC3)n2)c1
2768229	0	COc1ccc(NC(=O)C2Cc3c(-c4ccc(Cl)cc4)ccnc3O2)cc1OC
2768569	0	CC(C)Cc1ccc(C(C)C(=O)Nc2ccccc2O)cc1
2772172	0	O=C(O)C(F)(F)F.O=S(=O)(c1ccc(CN2CCOCCOCCN(Cc3ccc(S(=O)(=O)C(F)(F)F)cc3)CCOCC2)cc1)C(F)(F)F
2777432	0	Cc1ccc(NC(=O)/C=C/c2ccc(S(=O)(=O)N3CCOCC3)cc2)cc1S(=O)(=O)N(C)C
2789307	0	CC1=CC(=O)C(C(C)C)=C/C1=N\OS(=O)(=O)c1ccccc1
2789467	0	Cc1ccnc(OC(C(=O)O)C(OCc2ccccc2)(c2ccccc2)c2ccc(C(F)(F)F)cc2)n1
2790044	0	O=C(Nc1ccc(S(=O)(=O)N2CCCC2)cc1)c1ccc(CN2CCOCC2)cc1
2790354	1	CC(=O)c1c(C(C)=O)c(C)n(Cc2ccc(Cl)cc2)c1C
2790473	1	Cc1cc(O)c2c(c1)C(=O)[C@@]13C(=C2O)C(=O)[C@H]2C(O)[C@@H]1[C@H]1C(O)[C@@H]3C(=O)C3=C(O)c4c(O)cc(C)cc4C(=O)[C@]321
2791872	1	Cn1nc(C(C)(C)C)cc1C(=O)NCc1cc(F)cc2c1OCOC2
2792371	1	COc1ccccc1NS(=O)(=O)c1cc(C(=O)NC2CCN(Cc3ccccc3)CC2)ccc1C.Cl
2793088	0	C[n+]1c2n(c3ccccc31)N=C(c1ccc(Cl)cc1)CS2.[Br-]
2794916	0	COc1ccc(N2CCN(c3ncnc4c3[nH]c3ccccc34)CC2)cc1
2795608	0	Cc1ccc(F)cc1CNC(=O)c1cc(COc2ccc3ncccc3c2)on1
2795668	1	Cl.N=C(N)SCc1cccc2ccccc12
2795678	0	CSc1cccc(NS(=O)(=O)c2ccc3c(c2)CCN3C(C)=O)c1
2795769	0	Cc1cc(C)c(C)c(S(=O)(=O)NCc2ccncc2)c1C
2797721	0	Cc1nc2ccccc2c2c1CC(C(C)(Cl)Br)O2
2797977	0	COc1ccc(-c2cc(N)n(S(=O)(=O)c3ccc(F)cc3)n2)cc1OC
2798075	0	CCc1nc2ccc(C(=O)Nc3cc(-c4ccccc4)ccc3OC)cn2c1N(C)Cc1nccs1
2799295	0	Cn1nc(-c2ccc(OCC(=O)N3CCN(Cc4ccccc4)CC3)cc2)c2ccccc2c1=O
2800172	0	O=C(NCc1ccncc1)c1ccc(-c2ccc(F)c(F)c2)c2ccoc12
2800173	0	CCC1CCCCN1C(=O)c1cc(COc2ccc3ncccc3c2)on1
2803060	0	COc1ccc(CC(=O)Nc2cccc(S(=O)(=O)N3CCCC3)c2)cc1OC
2803102	1	O=C(CCCN1C(=O)/C(=C/c2ccccc2Cl)SC1=S)Nc1ccccn1
2805189	0	Cc1cccc(N2CCN(C(=O)C3CCC(CNS(=O)(=O)c4cccs4)CC3)CC2)c1C
2805212	0	COCC1CCCCN1C(=O)c1cc(COc2ccc3ncccc3c2)on1
2805464	0	Fc1ccc(CN2CCN(c3ncc(Cc4ccccc4)cn3)CC2)c(Cl)c1
2805513	0	Cc1csc2ncnc(N3CCN(C(=O)Nc4ccc(OC(F)(F)F)cc4)CC3)c12
2807234	1	O=C(Nc1ccc(N2CCN(C(=O)c3ccco3)CC2)c(Cl)c1)c1cc2ccccc2o1
2808509	0	Cc1c(C(=O)NCc2ccc3c(c2)OCCO3)sc(=O)n1Cc1ccc(S(=O)(=O)N(C)C)cc1
2808610	0	CCc1cccc(NC(=O)Cc2ccc(OC)c(OC)c2)c1
2808629	0	Cc1nn(C)c(Cl)c1NC(=O)OCc1ccc(Cl)cc1Cl
2808819	0	COc1ccc(CCNC(=O)CCNC(=O)c2ccc([N+](=O)[O-])cc2)cc1
2809268	1	CC1(C(=O)Nc2ccccc2)CCN1C(=O)C1(c2ccc(Cl)cc2)CC1
[truncated: 3,508 more rows]

## Sheet: 4. VZV
Bioactivity dataset 4. VZV
cid	Activite	Canonical_smiles
3011383	1	Nc1cc(OC[C@H](CO)OCP(=O)(O)O)nc(N)n1
53357718	1	Nc1ncnc2c1ncn2CCOC(Cc1ccccc1)CP(=O)(O)O
135398513	1	Nc1nc2c(ncn2COCCO)c(=O)[nH]1
446727	1	O=c1[nH]c(=O)n([C@H]2C[C@H](O)[C@@H](CO)O2)cc1/C=C/Br
168280858	1	CC(CO)(Cn1cnc2c(=O)[nH]c(N)nc21)OCP(=O)(O)O.CCN(CC)CC
5271150	1	O=c1[nH]c(=O)n([C@H]2C[C@H](O)[C@@H](CO)O2)cc1C#CCCCCCCCCCBr
11517272	1	CCCCCCCCCCC#Cc1cc2cn([C@H]3C[C@H](O)[C@@H](CO)O3)c(=O)nc2o1
135398740	1	Nc1nc2c(ncn2COC(CO)CO)c(=O)[nH]1
11513676	1	C/C=C/C[C@@H](C)[C@@H](O)[C@H]1C(=O)N[C@@H](CC)C(=O)N(C)[C@H](C)C(=O)N(CC)[C@@H](C(C)C)C(=O)N[C@@H](C(C)C)C(=O)N(C)[C@@H](CC(C)C)C(=O)N[C@@H](C)C(=O)N[C@H](C)C(=O)N(C)[C@@H](CC(C)C)C(=O)N(C)[C@@H](CC(C)C)C(=O)N(C)[C@@H](C(C)C)C(=O)N1C
137641103	1	CC(C)(C)C(=O)OCOP(=O)([O-])COCCOc1cc(N)nc(N)n1.[Na+]
490385	1	[N-]=[N+]=NC(CI)c1cn(COC(CO)CO)c(=O)[nH]c1=O
480974	1	O=C1c2ccccc2N(Cc2ccccc2)S(=O)(=O)N1Cc1ccc(Cl)cc1
11752151	1	CC(=O)O[C@@H]1[C@H](C)O[C@@H](Oc2c(C)c3c4c(c2O)[C@@H](C)CC[C@@H]4[C@@H](C)C[C@H]3C=C(C)C)[C@@H](O)[C@@H]1O
10099039	1	CCCCCCCCCCCCCCCCOCCCOP(=O)(O)COCCn1cc(F)c(N)nc1=O
54728126	1	Cc1cc(O)c(C(c2cn([C@H]3C[C@H](O)[C@@H](CO)O3)c(=O)[nH]c2=O)c2c(O)cc(C)oc2=O)c(=O)o1
11675456	1	CCCCCCCCC#Cc1cc2cn([C@H]3C[C@H](O)[C@@H](CO)O3)c(=O)nc2o1
60167178	1	CCCc1ccc(C#CC#Cc2cn([C@H]3C[C@H](O)[C@@H](CO)O3)c(=O)[nH]c2=O)cc1
490383	1	[N-]=[N+]=NC(CBr)c1cn(COC(CO)CO)c(=O)[nH]c1=O
490381	1	[N-]=[N+]=NC(CCl)c1cn(COCCO)c(=O)[nH]c1=O
6479050	1	CC/C=C/c1cccc(-c2cc3cn([C@H]4C[C@H](O)[C@@H](CO)O4)c(=O)nc3o2)c1
136266873	1	CCCCCCCCCCCCCCCCOCCCOP(=O)(CO[C@H](CO)Cn1cnc2c(=O)[nH]c(N)nc21)OCCCOCCCCCCCCCCCCCCCC
60167321	1	O=c1[nH]c(=O)n([C@H]2C[C@H](O)[C@@H](CO)O2)cc1C#CC#Cc1ccccn1
493045	1	Nc1cc(OCCOCP(=O)(O)O)nc(N)n1
162661376	1	CCN(CC)CC.N#CC(CO)(Cn1cnc2c(=O)[nH]c(N)nc21)OCP(=O)(O)O
6482436	1	CC(C)(C)[Si](OC[C@H]1C[C@@H](Cn2cnc3c(Cl)nc(N)nc32)c2cn(Cc3ccccc3)nc21)(c1ccccc1)c1ccccc1
54728124	1	Cc1cc(O)c(C(c2cn([C@H]3C[C@H](O)[C@@H](CO)O3)c(=O)[nH]c2=O)c2c(O)cc(C)n(C)c2=O)c(=O)n1C
71452912	1	CC(C)(C)C(=O)OCOP(=O)(C/C=C/Cn1cnc2c(Cl)nc(N)nc21)OCOC(=O)C(C)(C)C
145981055	1	C#C[C@@]1(O)[C@@H](CO)O[C@@H](n2cc(Br)c3c(Cl)ccnc32)[C@@H]1O
490387	1	[N-]=[N+]=NC(CCl)c1cn(CCC(CO)CO)c(=O)[nH]c1=O
162652514	1	C[C@H](NP(=O)(OC[C@@]1(F)O[C@@H](n2ccc(N)nc2=O)C(F)(F)[C@@H]1O)Oc1ccccc1)C(=O)OCc1ccccc1
122192828	1	O=C(Cn1c(=O)ccn(CCCCCOc2ccc(Br)cc2)c1=O)Nc1ccc(Oc2ccccc2)cc1
480975	1	O=C1c2ccccc2N(Cc2ccc(Cl)cc2)S(=O)(=O)N1Cc1ccc(Cl)cc1
480979	1	O=C1c2ccccc2N(Cc2ccc(Cl)cc2)S(=O)(=O)N1Cc1ccccc1
490384	1	[N-]=[N+]=NC(CCl)c1cn(COC(CO)CO)c(=O)[nH]c1=O
490382	1	[N-]=[N+]=NC(CI)c1cn(COCCO)c(=O)[nH]c1=O
490380	1	[N-]=[N+]=NC(CBr)c1cn(COCCO)c(=O)[nH]c1=O
490386	1	[N-]=[N+]=NC(CBr)c1cn(CCC(CO)CO)c(=O)[nH]c1=O
490388	1	[N-]=[N+]=NC(CI)c1cn(CCC(CO)CO)c(=O)[nH]c1=O
492112	1	CCCCCCc1cc2cn([C@H]3C[C@H](O)[C@@H](CO)O3)c(=O)nc2o1
16756531	1	CCCCCCc1cnc(-c2cc3cn([C@H]4C[C@H](O)[C@@H](CO)O4)c(=O)nc3o2)nc1
145977385	1	Nc1nc(N)nc(OCCOCP(=O)(O)O)n1
137631493	1	C[C@H](NP(=O)(OCC(CO)OCn1cnc2c(=O)[nH]c(N)nc21)Oc1ccccc1)C(=O)OCc1ccccc1
135908417	1	C[C@H](NP(=O)(OCCOCn1cnc2c(=O)[nH]c(N)nc21)Oc1cccc2ccccc12)C(=O)OCc1ccccc1
44427747	1	CCCCCc1ccc(C#Cc2cn(C/C=C3\OC(=O)C(OCc4ccccc4)=C3OCc3ccccc3)c(=O)[nH]c2=O)cc1
5284373	1	C/C=C/C[C@@H](C)[C@@H](O)[C@H]1C(=O)N[C@@H](CC)C(=O)N(C)CC(=O)N(C)[C@@H](CC(C)C)C(=O)N[C@@H](C(C)C)C(=O)N(C)[C@@H](CC(C)C)C(=O)N[C@@H](C)C(=O)N[C@H](C)C(=O)N(C)[C@@H](CC(C)C)C(=O)N(C)[C@@H](CC(C)C)C(=O)N(C)[C@@H](C(C)C)C(=O)N1C
137654983	1	CC(C)(NP(=O)(OCC(CO)OCn1cnc2c(=O)[nH]c(N)nc21)Oc1ccccc1)C(=O)OCc1ccccc1
90662952	1	CCCCCCCCc1ccc(-c2cc3cn([C@H]4C[C@H](O)[C@@H](CO)O4)c(=O)nc3s2)cc1
44378805	1	O=c1[nH]c(=O)n([C@H]2CC(O)C(CO)S2)cc1I
145987204	1	C#C[C@@]1(O)[C@@H](CO)O[C@@H](n2cc(Cl)c3c(Cl)ccnc32)[C@@H]1O
11568210	1	CCCCCCCCCCC#Cc1cc2cn([C@@H]3O[C@H](CO)[C@@H](O)[C@H]3O)c(=O)nc2o1
135398748	1	Nc1nc2c(ncn2CCC(CO)CO)c(=O)[nH]1
5272229	1	CC(NC(=S)Nc1ccc(NC(=O)c2ccccc2F)cc1)c1csc2ccccc12
5271149	1	O=c1[nH]c(=O)n([C@H]2C[C@H](O)[C@@H](CO)O2)cc1C#CCCCCCCCCCCl
25258113	1	CCC1(Cc2ccccc2)OS(=O)(=O)C=C1OCc1ccccc1
137632270	1	CCOP(=O)(OCC)C1CC(Cn2c(=O)n(Cc3ccc(F)cc3)c(=O)c3ccccc32)ON1Cc1ccccc1
16735489	1	CC(=O)OC[C@H]1O[C@@H](n2cc(C#CI)c(=O)[nH]c2=O)[C@@H](OC(C)=O)[C@@H]1OC(C)=O
15986984	1	CCCCCCCCCCCCCCCCOCCCOP(=O)(O)CC/C=C\Cn1cc(C)c(=O)[nH]c1=O
136123436	1	Nc1nc2c(ncn2/C=C2/CC2(CO)CCP(=O)(O)O)c(=O)[nH]1
122192833	1	O=C(Cn1c(=O)ccn(CCCCOc2ccc(Br)cc2)c1=O)Nc1ccc(Oc2ccccc2)cc1
64988	1	Nc1nc(N)c2ncn(CCOCP(=O)(O)O)c2n1
3006050	1	COc1nc(N)nc2c1ncn2/C=C1/CC1(CO)CO
11779856	1	CCCOc1nc(N)nc2c1ncn2/C=C1/CC1(CO)CO
156015813	1	CCCCCOC(=O)[C@@H](NP(=O)(CO[C@@H](CF)COc1ncc(F)c(N)n1)Oc1ccccc1)C(C)C
492111	1	CCCCCc1cc2cn([C@H]3C[C@H](O)[C@@H](CO)O3)c(=O)nc2o1
10406438	1	O=c1[nH]c(=O)n([C@H]2C[C@H](O)[C@]3(CO)C[C@H]23)cc1I
44379067	1	CCCc1cn([C@H]2CC(O)C(CO)S2)c(=O)[nH]c1=O
6475209	1	O=c1[nH]c(=O)n([C@@H]2CO[C@H](CO)[C@H]2CO)cc1/C=C/Br
483947	1	O=c1[nH]c(=O)n([C@H]2C[C@H](O)[C@@H](CO)S2)cc1I
16756867	1	CCCCCc1cnc(-c2cc3cn([C@H]4C[C@H](O)[C@@H](CO)O4)c(=O)nc3o2)nc1
60167325	1	O=c1[nH]c(=O)n([C@H]2C[C@H](O)[C@@H](CO)O2)cc1C#CC#Cc1ccc(OC(F)(F)F)cc1
46876177	1	Cc1cn(C2O[C@H](CO)[C@@H](O)[C@@H]2O)c(=O)nc1OC(F)F
135908419	1	C[C@H](NP(=O)(OCCOCn1cnc2c(=O)[nH]c(N)nc21)Oc1ccccc1)C(=O)OCc1ccccc1
14885958	1	C#Cc1cn([C@@H]2O[C@H](CO)[C@@H](O)[C@@H]2O)c(=O)[nH]c1=O
456214	1	CC(C)[C@H](CO)Nc1nc(Nc2cccc(Cl)c2)c2ncn(C(C)C)c2n1
145966378	1	Cc1cn(C/C=C/CP(=O)(N[C@@H](C)C(=O)OC(C)C)Oc2ccccc2)c(=O)[nH]c1=O
493475	1	CCCCCCCCCCCCc1cc2cn([C@H]3C[C@H](O)[C@@H](CO)O3)c(=O)nc2o1
44378742	1	C=Cc1cn([C@H]2CC(O)C(CO)S2)c(=O)[nH]c1=O
6479051	1	CCC/C=C/c1cccc(-c2cc3cn([C@H]4C[C@H](O)[C@@H](CO)O4)c(=O)nc3o2)c1
137633694	1	CC(C)OC(=O)[C@H](C)NP(=O)(OCC(COP(=O)(N[C@@H](C)C(=O)OC(C)C)Oc1cccc2ccccc12)OCn1cnc2c(=O)[nH]c(N)nc21)Oc1cccc2ccccc12
484044	1	O=C(NCc1ccc(Cl)cc1)c1c[nH]c2c(F)cccc2c1=O
71452911	1	CC(C)(C)C(=O)OCOP(=O)(C/C=C/Cn1cnc2c(NC3CC3)nc(N)nc21)OCOC(=O)C(C)(C)C
16756643	1	CCCCCCCC/C=C/c1cc2cn([C@H]3C[C@H](O)[C@@H](CO)O3)c(=O)nc2o1
472172	1	C#Cc1cn([C@H]2C[C@H](O)[C@@H](CO)O2)c(=O)[nH]c1=O
456904	1	CCc1cn([C@H]2C[C@H](O)[C@@H](CO)S2)c(=O)[nH]c1=O
9953786	1	O=C(NCc1ccc(Cl)cc1)c1c[nH]c2sc(CN3CCOCC3)cc2c1=O
11588933	1	O=c1[nH]c(=O)n([C@H]2C[C@H](O)[C@@H](CO)O2)cc1C#CI
137656328	1	CCCCCCCCCCCCCCCCCCOCCOP(=O)(O)COCCn1cnc(N)nc1=O
476082	1	Nc1nc(NC2CC2)c2ncn(CCOCP(=O)(O)O)c2n1
136238816	1	CC(C)(C)C(=O)OCOP(=O)(C/C=C/Cn1cnc2c(=O)[nH]c(N)nc21)OCOC(=O)C(C)(C)C
45272643	1	O=c1c2ncn(CC3(CO)CC3CO)c2nc2[nH]c(-c3ccc(Br)s3)cn12
16735488	1	C[Si](C)(C)C#Cc1cn([C@H]2C[C@H](O)[C@@H](CO)O2)c(=O)[nH]c1=O
5272227	1	CC(NC(=S)Nc1ccc(NC(=O)c2ccccc2F)cc1)c1ccc(C#N)cc1
44379068	1	CCc1cn([C@H]2CC(O)C(CO)S2)c(=O)[nH]c1=O
5272239	1	Cc1cc(NC(=O)c2ccccc2F)ccc1NC(=S)NC(C)c1ccc(F)cc1
137656437	1	CC(C)(C)C(=O)OCOP(=O)(COCCOc1cc(N)nc(N)n1)OCOC(=O)C(C)(C)C
11779021	1	C#C[C@@]1(O)[C@@H](CO)O[C@@H](n2cnc3c(N)ncnc32)[C@@H]1O
54728125	1	Cc1cc(O)c(C(c2cn([C@H]3C[C@H](O)[C@@H](CO)O3)c(=O)[nH]c2=O)c2c(O)cc(C)[nH]c2=O)c(=O)[nH]1
54768471	1	CCOC(=O)[C@H](C)NP(=O)(COCCOc1cc(N)nc(N)n1)N[C@@H](C)C(=O)OCC
135972443	1	Nc1nc2c(ncn2[C@@H]2C(F)[C@H](CO)C2CO)c(=O)[nH]1
46232069	1	Cc1cc2c(c(=O)o1)C(c1cn([C@H]3C[C@H](O)[C@@H](CO)O3)c(=O)[nH]c1=O)C(C#N)=C(N)O2
145964624	1	COC(=O)[C@H](C)NP(=O)(C/C=C/Cn1cc(C)c(=O)[nH]c1=O)Oc1ccccc1
122100	1	Nc1ncnc2c1ncn2C1CC(CO)C1CO
14378496	1	Nc1ncnc2c1ncn2C1C[C@@H](CO)[C@@H]1CO
90665344	1	O=c1[nH]c(=O)n(C2C=CC(O)C2)cc1-c1cccs1
5272241	1	COc1cc(NC(=O)c2ccccc2F)ccc1NC(=S)NC(C)c1ccc(F)cc1
5272218	1	CC(NC(=S)Nc1ccc(NC(=O)c2ccccc2F)cc1)c1ccccc1
162662244	1	CC(=O)OC[C@H]1O[C@@H](n2cc3c(C#CC4(O)c5ccccc5-c5ccccc54)c(-c4ccc(C)cc4)oc3nc2=O)C[C@@H]1OC(C)=O
134382946	1	CCCCCOC(=O)C[C@H](NP(=O)(CO[C@H](CF)Cn1ccc(N)nc1=O)Oc1ccccc1)C(=O)OCCCCC
137638251	1	CC(C)(C)C(=O)OCOP(=O)(COCCn1cnc(N)nc1=O)OCOC(=O)C(C)(C)C
5272240	1	CC(NC(=S)Nc1ccc(NC(=O)c2ccccc2F)cc1Cl)c1ccc(F)cc1
44379245	1	C#CCc1cn([C@H]2CC(O)C(CO)S2)c(=O)[nH]c1=O
11581278	1	CCCCCCC#Cc1cc2cn([C@H]3C[C@H](O)[C@@H](CO)O3)c(=O)nc2o1
6482434	1	CC(C)(C)[Si](OC[C@H]1C[C@@H](Cn2cnc3c(N)ncnc32)c2cn(Cc3ccccc3)nc21)(c1ccccc1)c1ccccc1
162674735	1	CCCCCc1ccc(C#Cc2c(-c3ccc(CCCCC)cc3)oc3nc(=O)n([C@H]4C[C@H](OC(C)=O)[C@@H](COC(C)=O)O4)cc23)cc1
15986891	1	CCCCCCCCCCCCCCCCOCCCOP(=O)(O)CC/C=C\Cn1ccc(N)nc1=O
11516993	1	CCCCCCCCC#Cc1cc2cn([C@@H]3O[C@H](CO)[C@@H](O)[C@@H]3O)c(=O)nc2o1
135480766	1	Nc1nc2c(ncn2O[C@H](CO)CCO)c(=O)[nH]1
16732578	1	COc1cc(CC(C)(CF)OC(C)=O)nc(OC)n1
137631795	1	CCCOC(=O)[C@H](C)NP(=O)(OCC(CCn1cnc2c(OC)nc(N)nc21)COP(=O)(N[C@@H](C)C(=O)OCCC)Oc1cccc2ccccc12)Oc1cccc2ccccc12
134382869	1	CCCCCOC(=O)C[C@H](NP(=O)(CO[C@@H](CF)Cn1cnc2c(N)ncnc21)Oc1ccccc1)C(=O)OCCCCC
145986362	1	C#C[C@@]1(O)[C@@H](CO)O[C@@H](n2cc(I)c3c(Cl)ccnc32)[C@@H]1O
25257438	1	CCC1(Cc2ccccc2)OS(=O)(=O)C=C1OCc1ccc(Br)cc1
492107	1	C#CCCCc1cc2cn([C@H]3C[C@H](O)[C@@H](CO)O3)c(=O)nc2o1
137646406	1	CCOP(=O)(OCC)[C@@H]1C[C@@H](Cn2c(=O)n(C(=O)c3ccc(F)cc3)c(=O)c3ccccc32)ON1Cc1ccccc1
137646105	1	CC(C)(NP(=O)(OCC(COP(=O)(NC(C)(C)C(=O)OCc1ccccc1)Oc1ccccc1)OCn1cnc2c(=O)[nH]c(N)nc21)Oc1ccccc1)C(=O)OCc1ccccc1
135516822	1	Nc1nc2c(ncn2[C@H]2C[C@H](O)[C@@H](OCP(=O)(O)O)C2)c(=O)[nH]1
5271344	1	Nc1nc(N)c2ncn(/C=C3\CC3(CO)CO)c2n1
25257207	1	CCC1(Cc2ccccc2)OS(=O)(=O)C=C1OCCCCCCc1ccccc1
44582864	1	CCC/C=C/c1ccccc1-c1cc2cn([C@H]3C[C@H](O)[C@@H](CO)O3)c(=O)nc2o1
135926125	1	Nc1nc2c(ncn2COCCOP(=O)(N[C@@H](Cc2ccccc2)C(=O)OCc2ccccc2)Oc2ccccc2)c(=O)[nH]1
480973	1	O=C1c2ccccc2N(Cc2ccccc2Cl)S(=O)(=O)N1COCc1ccccc1
25257440	1	CCC1(Cc2ccccc2)OS(=O)(=O)C=C1OCc1ccc(C(C)(C)C)cc1
53249144	1	Cc1oc(=O)oc1COP(=O)(O)COCCn1cnc2c(N)ncnc21
44427744	1	O=C1O/C(=C\Cn2cc(C#Cc3ccc(Br)cc3)c(=O)[nH]c2=O)C(OCc2ccccc2)=C1OCc1ccccc1
155541068	1	CCCCc1cn(C[C@H](O)[C@H]2OC(=O)C(OCc3ccccc3)=C2OCc2ccccc2)nn1
480971	1	O=C1c2ccccc2N(Cc2ccccc2)S(=O)(=O)N1Cc1ccccc1
65275	1	COc1nc(N)nc2nc[nH]c12
25257680	1	CCC1(Cc2ccccc2)OS(=O)(=O)C=C1OCCc1ccccc1
162674763	1	CCCCCc1ccc(-c2oc3nc(=O)n([C@H]4C[C@H](OC(C)=O)[C@@H](COC(C)=O)O4)cc3c2C#CCO)cc1
25257894	1	CCC1(Cc2ccccc2)OS(=O)(=O)C=C1OCc1ccc(Cl)cc1
135908405	1	COC(=O)[C@H](C)NP(=O)(OCCOCn1cnc2c(=O)[nH]c(N)nc21)Oc1cccc2ccccc12
122193267	1	O=C1O/C(=C\Cn2cnc3ccn(C/C=C4\OC(=O)C(OCc5ccccc5)=C4OCc4ccccc4)c3c2=O)C(OCc2ccccc2)=C1OCc1ccccc1
137638691	1	CCOP(=O)(OCC)C1CC(Cn2c(=O)n(C(=O)c3ccc(F)cc3)c(=O)c3ccccc32)ON1Cc1ccccc1
162643167	1	CCCCCc1ccc(-c2oc3nc(=O)n([C@H]4C[C@H](OC(C)=O)[C@@H](COC(C)=O)O4)cc3c2C#Cc2ccc(C)cc2)cc1
25257893	1	CCC1(Cc2ccccc2)OS(=O)(=O)C=C1OCc1ccc(C(F)(F)F)cc1
122192845	1	CN(C(=O)Cn1c(=O)ccn(CCCCCOc2ccc(Br)cc2)c1=O)c1ccc(Oc2ccccc2)cc1
137641663	1	COc1nc(N)nc2c1ncn2CCC(COP(=O)(N[C@@H](C)C(=O)OCC(C)(C)C)Oc1cccc2ccccc12)COP(=O)(N[C@@H](C)C(=O)OCC(C)(C)C)Oc1cccc2ccccc12
155534038	1	CCCCCCCCCCc1cn(C[C@H](O)[C@H]2OC(=O)C(OCc3ccccc3)=C2OCc2ccccc2)nn1
145951735	1	CC(=O)C1=C(C)N(Cc2cn(Cc3ccc([N+](=O)[O-])cc3)nn2)C(=O)N(Cc2cn(Cc3ccc([N+](=O)[O-])cc3)nn2)C1c1ccccc1
44140464	1	O=c1c2ncn(COCCO)c2nc2[nH]c(-c3cccs3)cn12
137632844	1	CCOP(=O)(OCC)[C@@H]1C[C@@H](Cn2c(=O)n(C(=O)c3cccc(F)c3)c(=O)c3ccccc32)ON1Cc1ccccc1
137662294	1	CCOP(=O)(OCC)C1CC(Cn2c(=O)n(C(=O)c3cccc(F)c3)c(=O)c3ccccc32)ON1Cc1ccccc1
25257437	1	CCC1(Cc2ccccc2)OS(=O)(=O)C=C1OCc1ccc(F)cc1
5272219	1	CC(C)(NC(=S)Nc1ccc(NC(=O)c2ccccc2F)cc1)c1ccccc1
137649891	1	CCC(C)(C)COC(=O)[C@H](C)NP(=O)(OCC(CO)CCn1cnc2c(OC)nc(N)nc21)Oc1cccc2ccccc12
56663162	1	CC(CP(=O)(O)O)OCCn1ccc(=O)[nH]c1=O
480970	1	O=C1c2ccccc2N(COCc2ccccc2)S(=O)(=O)N1COCc1ccccc1
46875044	1	CCOC(=O)/C=C\C=C\[C@H]1OC(n2ccc(=O)[nH]c2=O)[C@H](O)[C@@H]1O
135422928	1	Nc1nc2c(ncn2OCC/C=C/P(=O)(O)O)c(=O)[nH]1
25257896	1	CCC1(Cc2ccccc2)OS(=O)(=O)C=C1OCc1ccccc1Cl
44590599	1	CCC1(Cc2ccccc2)OS(=O)(=O)CC1=O
15954514	1	CC1=NN(c2ccccc2)C(=O)C1C(c1cn([C@H]2C[C@H](O)[C@@H](CO)O2)c(=O)[nH]c1=O)C1C(=O)N(c2ccccc2)N=C1C
44140465	1	O=c1c2ncn(COCCO)c2nc2[nH]c(-c3ccc(Br)s3)cn12
11579992	1	Cc1cn([C@@H]2O[C@H](CO)[C@@H](O)C2(F)F)c(=O)[nH]c1=O
67781638	1	C=C(C)[C@@H]1CC[C@]2(C(=O)O)CC[C@]3(C)[C@H](CC[C@@H]4[C@@]5(C)CC(=O)C(=O)C(C)(C)[C@@H]5CC[C@]43C)[C@@H]12
11120681	1	O=c1nc2c(cn1[C@H]1C[C@H](O)[C@@H](CO)O1)Oc1ccccc1N2
493054	1	Nc1nc(OCCOCP(=O)(O)O)cc(=O)[nH]1
155517451	1	O=c1c2ncn(CCC(CO)CO)c2nc2[nH]c(-c3ccc(O)cc3)cn12
137661992	1	CCC(C)(C)COC(=O)[C@H](C)NP(=O)(OCC(CCn1cnc2c(OC)nc(N)nc21)COP(=O)(N[C@@H](C)C(=O)OCC(C)(C)CC)Oc1cccc2ccccc12)Oc1cccc2ccccc12
60167179	1	CCCCCCc1ccc(C#CC#Cc2cn([C@H]3C[C@H](O)[C@@H](CO)O3)c(=O)[nH]c2=O)cc1
44576695	1	CCCCCc1ccc(C#Cc2cn(C/C=C\CN3C(=O)c4ccccc4C3=O)c(=O)[nH]c2=O)cc1
164628867	1	CCCCCCCCOc1ccc2c(c1)N(C)c1nc(=O)n([C@H]3C[C@H](O)[C@@H](CO)O3)cc1O2
16732576	1	COc1nc(OC)c(Br)c(C(Br)Br)n1
145985709	1	Nc1nc2c(ncn2[C@@H]2C[C@H](OCP(=O)(O)O)C[C@H]2O)c(=O)[nH]1
145957212	1	COc1ccc(OC)c(C2C(C(C)=O)=C(C)N(Cc3cn(Cc4ccccc4)nn3)C(=O)N2Cc2cn(Cc3ccccc3)nn2)c1
70685525	1	Nc1ncnc2c1sc1ncn([C@H]3C[C@H](O)[C@@H](CO)O3)c12
137638700	1	CCCOC(=O)[C@H](C)NP(=O)(OCC(CO)CCn1cnc2c(OC)nc(N)nc21)Oc1cccc2ccccc12
60167326	1	Cc1cc(C#CC#Cc2cn([C@H]3C[C@H](O)[C@@H](CO)O3)c(=O)[nH]c2=O)ccc1F
44416677	1	CC1(C)CC(=O)C2=C(C1)OC(N)=C(C#N)C2c1cn([C@H]2C[C@H](O)[C@@H](CO)O2)c(=O)[nH]c1=O
137652939	1	COc1nc(N)nc2c1ncn2CCC(CO)COP(=O)(N[C@@H](C)C(=O)OC1CCCCC1)Oc1cccc2ccccc12
5272231	1	CC(NC(=S)Nc1ccc(NC(=O)c2ccccc2F)cc1)c1c[nH]c2ccccc12
25257441	1	CCC1(Cc2ccccc2)OS(=O)(=O)C=C1OCc1cccc(Cl)c1
401639	1	O=C1c2ccccc2N(Cc2ccccc2)S(=O)(=O)N1COCc1ccccc1
145990374	1	CC[C@@]1(O)[C@@H](CO)O[C@@H](n2cc(Cl)c3c(N)ncnc32)[C@@H]1O
457954	1	NC(=O)c1csc([C@@H]2O[C@H](CO)[C@@H](O)[C@H]2O)n1
122192832	1	O=C(Cn1c(=O)ccn(CCCOc2ccc(Br)cc2)c1=O)Nc1ccc(Oc2ccccc2)cc1
127032156	1	C#C[C@@]1(O)[C@@H](CO)O[C@@H](n2cnc3c(NCc4cccc(Cl)c4)nc(Cl)nc32)[C@@H]1O
136130200	1	CC1=C(/C=C/C(C)=C/C=C/C(C)=C/C=N/[N-]C(=S)[N-]C(=S)[N-]/N=C/C=C(C)/C=C/C=C(C)/C=C/C2=C(C)CCCC2(C)C)C(C)(C)CCC1.O.[Na+].[Na+].[Na+]
480981	1	O=C1c2ccccc2N(Cc2ccccc2Cl)S(=O)(=O)N1Cc1ccccc1Cl
5272230	1	CC(NC(=S)Nc1ccc(NC(=O)c2ccccc2F)cc1)c1ccc2ccccc2c1
493487	1	CCCCCCCc1ccc(-c2cc3cn([C@H]4C[C@H](O)[C@@H](CO)O4)c(=O)nc3o2)cc1
492109	1	C#CCCCCCCc1cc2cn([C@H]3C[C@H](O)[C@@H](CO)O3)c(=O)nc2o1
25257676	1	O=S1(=O)C=C(OCc2ccccc2)C(Cc2ccccc2)(Cc2ccccc2)O1
5270689	1	Cc1nn([C@H]2C[C@H](O)[C@@H](CO)S2)c(=O)[nH]c1=O
60172	1	Nc1ncnc2c1ncn2CCOCP(=O)(O)O
137648967	1	CCOP(=O)(OCC)C1CC(Cn2c(=O)n(Cc3ccccc3F)c(=O)c3ccccc32)ON1Cc1ccccc1
162672687	1	CC(=O)OC[C@H]1O[C@@H](n2cc3c(C#CCCCCn4c5ccccc5c5ccccc54)c(-c4ccc(C)cc4)oc3nc2=O)C[C@@H]1OC(C)=O
134382943	1	Nc1ccnc(OC[C@H](CF)OCP(=O)(O)O)n1
11438492	1	O=c1[nH]c(=O)n([C@H]2C[C@H](O)[C@]3(CO)C[C@H]23)cc1Br
470131	1	Nc1ncnc2c1ncn2[C@@H]1CO[C@H](CO)[C@H]1CO
122192837	1	O=C(Cn1c(=O)ccn(CCCCCOc2ccc(Br)cc2)c1=O)Nc1ccc(Cc2ccccc2)cc1
488247	1	[N-]=[N+]=NC(CCl)c1cn([C@H]2C[C@H](O)[C@@H](CO)O2)c(=O)[nH]c1=O
168289885	1	CC(=O)OC[C@H]1O[C@@H](n2cc(/C(Cl)=C\S(=O)(=O)c3ccc(C)cc3)c(=O)[nH]c2=O)C[C@@H]1OC(C)=O
162647843	1	CCCCCc1ccc(-c2oc3nc(=O)n([C@H]4C[C@H](OC(C)=O)[C@@H](COC(C)=O)O4)cc3c2C#CCCO)cc1
44378813	1	CC(C)c1cn([C@H]2CC(O)C(CO)S2)c(=O)[nH]c1=O
137661965	1	C[C@H](NP(=O)(OCC(COP(=O)(N[C@@H](C)C(=O)OCc1ccccc1)Oc1cccc2ccccc12)OCn1cnc2c(=O)[nH]c(N)nc21)Oc1cccc2ccccc12)C(=O)OCc1ccccc1
480977	1	O=C1c2ccccc2N(Cc2ccc(Cl)c(Cl)c2)S(=O)(=O)N1Cc1ccccc1
136219328	1	Cc1cc(C)c(/C=C/c2nc(N)[nH]c(=O)c2Br)c(C)c1
44378905	1	C#Cc1cn([C@H]2CC(O)C(CO)S2)c(=O)[nH]c1=O
45487935	1	CCCCCc1ccc(-c2cc3cn([C@@H]4O[C@H](CO)[C@@H](O)C4(F)F)c(=O)nc3o2)cc1
25257439	1	CCC1(Cc2ccccc2)OS(=O)(=O)C=C1OCc1ccc(C)cc1
25257206	1	CCC1(Cc2ccccc2)OS(=O)(=O)C=C1OCCCc1ccccc1
162668872	1	CC(=O)OC[C@H]1O[C@@H](n2cc3c(C#Cc4ccc(C)cc4)c(-c4ccc(C)cc4)oc3nc2=O)C[C@@H]1OC(C)=O
20841912	1	Cc1cn([C@H]2C[C@H](O)[C@@H](CO)O2)c(=O)c[n+]1[O-]
25257679	1	CCC1(Cc2ccccc2)OS(=O)(=O)C=C1OCC1CCCCC1
135541417	1	Nc1nc2c(ncn2C/C=C\CCP(=O)(O)O)c(=O)[nH]1
137640683	1	CC(C)(NP(=O)(OCC(COP(=O)(NC(C)(C)C(=O)OCc1ccccc1)Oc1cccc2ccccc12)OCn1cnc2c(=O)[nH]c(N)nc21)Oc1cccc2ccccc12)C(=O)OCc1ccccc1
60167463	1	O=c1[nH]c(=O)n([C@H]2C[C@H](O)[C@@H](CO)O2)cc1C#CC#CCO
11495737	1	CCCCCCCCCCC#Cc1cc2cn([C@@H]3O[C@H](CO)[C@@H](O)[C@@H]3O)c(=O)nc2o1
51041062	1	O=c1[nH]c(=O)n([C@H]2C[C@H](O)[C@@H](CO)O2)cc1-c1cn(-c2ccc(Oc3ccccc3)cc2)nn1
145982558	1	Cc1cn([C@H]2C[C@H](O)[C@@H](OCP(=O)(O)O)C2)c(=O)[nH]c1=O
16072395	1	Nc1ncnc2c1ncn2/C=C1/[C@@H](F)[C@H]1CO
511675	1	CCCCCCCOCCc1cc2cn([C@H]3C[C@H](O)[C@@H](CO)O3)c(=O)nc2o1
5271151	1	O=c1[nH]c(=O)n([C@H]2C[C@H](O)[C@@H](CO)O2)cc1C#CCCCCCCCCCI
60613	1	Nc1ccn(C[C@@H](CO)OCP(=O)(O)O)c(=O)n1
145959823	1	CC(=O)C1=C(C)N(Cc2cn(Cc3ccccc3)nn2)C(=O)N(Cc2cn(Cc3ccccc3)nn2)C1c1ccccc1
51040642	1	O=c1[nH]c(=O)n([C@H]2C[C@H](O)[C@@H](CO)O2)cc1-c1cn(-c2c(F)cccc2F)nn1
25257681	1	CCC1(Cc2ccccc2)OS(=O)(=O)C=C1OCCCCc1ccccc1
137656288	1	COc1nc(N)nc2c1ncn2CCC(CO)COP(=O)(N[C@@H](C)C(=O)OCC(C)(C)C)Oc1cccc2ccccc12
11647092	1	CCCCCCCCC#Cc1cc2cn([C@@H]3O[C@H](CO)[C@@H](O)[C@H]3O)c(=O)nc2o1
493477	1	O=c1nc2oc(CCCCCCCCCCl)cc2cn1[C@H]1C[C@H](O)[C@@H](CO)O1
51357423	1	CCCCCc1ccc(-c2cc3cn([C@H]4C[C@H](O)[C@@H](COC(=O)[C@H](Cc5ccccc5)NC(=O)[C@@H]5CCCN5C(=O)[C@@H](N)C(C)C)O4)c(=O)nc3o2)cc1
9979184	1	CCCCCc1ccc(-c2cc3cn([C@H]4C[C@H](O)[C@@H](CO)O4)c(=O)nc3s2)cc1
493476	1	O=c1nc2oc(CCCCCCCCCF)cc2cn1[C@H]1C[C@H](O)[C@@H](CO)O1
492115	1	CCCCCCCCCCc1cc2cn([C@H]3C[C@H](O)[C@@H](CO)O3)c(=O)nc2o1
51356862	1	CCCCCc1ccc(-c2cc3cn([C@H]4C[C@H](OC(=O)[C@@H](NC(=O)[C@@H]5CCCN5C(=O)[C@@H](N)C(C)C)C(C)C)[C@@H](CO)O4)c(=O)nc3o2)cc1
51357968	1	CCCCCc1ccc(-c2cc3cn([C@H]4C[C@H](O)[C@@H](COC(=O)[C@@H](NC(=O)[C@@H]5CCCN5C(=O)[C@@H](N)CCCCN)C(C)C)O4)c(=O)nc3o2)cc1
493473	1	CCCCCCCCCc1cc2cn([C@H]3C[C@H](O)[C@@H](CO)O3)c(=O)nc2o1
513140	1	CCCCOCCCCCCCCCc1cc2cn([C@H]3C[C@H](O)[C@@H](CO)O3)c(=O)nc2o1
493481	1	Cc1ccc(-c2cc3cn([C@H]4C[C@H](O)[C@@H](CO)O4)c(=O)nc3o2)cc1
45102702	1	CCCCCc1ccc(-c2cc3cn([C@@H]4O[C@H](CO)[C@@H](O)[C@@H]4F)c(=O)nc3o2)cc1
9870496	1	CN(Cc1cc2c(=O)c(C(=O)NCc3ccc(Cl)cc3)cn(C)c2s1)C[C@@H](O)c1cnccn1
492114	1	CCCCCCCCc1cc2cn([C@H]3C[C@H](O)[C@@H](CO)O3)c(=O)nc2o1
493482	1	CCCc1ccc(-c2cc3cn([C@H]4C[C@H](O)[C@@H](CO)O4)c(=O)nc3o2)cc1
51357146	1	CCCCCc1ccc(-c2cc3cn([C@H]4C[C@H](O)[C@@H](COC(=O)[C@H](CC(C)C)NC(=O)[C@@H]5CCCN5C(=O)[C@@H](N)C(C)C)O4)c(=O)nc3o2)cc1
513141	1	CCCCCOCCCCCCCCCc1cc2cn([C@H]3C[C@H](O)[C@@H](CO)O3)c(=O)nc2o1
90662954	1	CCCCc1ccc(-c2cc3cn([C@H]4C[C@H](O)[C@@H](CO)O4)c(=O)nc3s2)cc1
135972447	1	Nc1nc2c(ncn2[C@@H]2C[C@H](CO)C2CO)c(=O)[nH]1
136002157	1	Nc1nc2c(ncn2C2C[C@@H](CO)[C@@H]2CO)c(=O)[nH]1
15958371	1	CCCCCCCCCCCCCCCCOCCCOP(=O)(O)COCCn1cnc2c(NC3CC3)nc(N)nc21
493478	1	O=c1nc2oc(CCCCCCCCCBr)cc2cn1[C@H]1C[C@H](O)[C@@H](CO)O1
51353745	1	CCCCCc1ccc(-c2cc3cn([C@H]4C[C@H](O)[C@@H](COC(=O)[C@@H](NC(=O)[C@@H]5CCCN5C(=O)[C@@H](N)CC(=O)O)C(C)C)O4)c(=O)nc3o2)cc1
493479	1	O=c1nc2oc(CCCCCCCCCI)cc2cn1[C@H]1C[C@H](O)[C@@H](CO)O1
6479197	1	O=c1[nH]c(=O)n([C@@H]2CO[C@H](CO)O2)cc1/C=C/I
493488	1	CCCCCCCCc1ccc(-c2cc3cn([C@H]4C[C@H](O)[C@@H](CO)O4)c(=O)nc3o2)cc1
51357704	1	CCCCCc1ccc(-c2cc3cn([C@H]4C[C@H](O)[C@@H](COC(=O)[C@@H](NC(=O)[C@@H]5CCCN5C(=O)[C@@H](N)CC(N)=O)C(C)C)O4)c(=O)nc3o2)cc1
23519645	1	Nc1ccn([C@@H]2O[C@](F)(CO)[C@@H](O)C2(F)F)c(=O)n1
90662953	1	CCCCCCc1ccc(-c2cc3cn([C@H]4C[C@H](O)[C@@H](CO)O4)c(=O)nc3s2)cc1
16756528	1	CCCCCCc1ccc(-c2cc3cn([C@H]4C[C@H](O)[C@@H](CO)O4)c(=O)nc3o2)nc1
513144	1	O=c1nc2oc(CCCCCCCCCOCCCCCl)cc2cn1[C@H]1C[C@H](O)[C@@H](CO)O1
513142	1	CC(C)CCOCCCCCCCCCc1cc2cn([C@H]3C[C@H](O)[C@@H](CO)O3)c(=O)nc2o1
491953	1	O=C(NCc1ccc(Cl)cc1)c1cn2c(CCO)cc3cc(CN4CCOCC4)cc(c1=O)c32
60750	1	Nc1ccn([C@@H]2O[C@H](CO)[C@@H](O)C2(F)F)c(=O)n1
134382706	1	CCCCCOC(=O)C[C@H](NP(=O)(CO[C@H](CF)Cn1cnc2c(N)ncnc21)Oc1ccccc1)C(=O)OCCCCC
491954	1	O=C(NCc1ccc(Cl)cc1)c1cn2c(CCN3CCOCC3)cc3cc(CN4CCOCC4)cc(c1=O)c32
22012704	1	CC(NC(=O)Nc1ccc(NC(=O)c2ccccc2F)c(C#N)c1)c1ccc(F)cc1
10174031	1	CN(Cc1cc2c(=O)c(C(=O)NCc3ccc(Cl)cc3)cn(C)c2o1)C[C@@H](O)c1ccco1
10311242	1	Cc1c(CN(C)C[C@@H](O)c2ncccn2)sc2c(=O)c(C(=O)NCc3ccc(F)cc3)cn(C)c12
9805202	1	CN1C(=O)Cn2cc(C(=O)NCc3ccc(Cl)cc3)c(=O)c3cc(CN4CCOCC4)cc1c32
492113	1	CCCCCCCc1cc2cn([C@H]3C[C@H](O)[C@@H](CO)O3)c(=O)nc2o1
44582863	1	CC/C=C/c1ccc(-c2cc3cn([C@H]4C[C@H](O)[C@@H](CO)O4)c(=O)nc3o2)cc1
9906078	1	O=c1[nH]c(=O)n([C@H]2C[C@H](O)[C@]3(CO)C[C@H]23)cc1/C=C/Br
142433105	1	CCCCCOC(=O)[C@@H](NP(=O)(CO[C@H](CO)Cn1cnc2c(N)ncnc21)N[C@H](C(=O)OCCCCC)C(C)C)C(C)C
493042	1	CC(C)OP(=O)(COCCOc1cc(N)ncn1)OC(C)C
493050	1	Nc1nc(NC2CC2)cc(OCCOCP(=O)(O)O)n1
493049	1	Nc1nc(NC2CC2)cc(=O)n1CCOCP(=O)(O)O
493053	1	CN(C)c1cc(OCCOCP(=O)(O)O)nc(N)n1
135490839	1	Nc1cc(=O)[nH]c(SCCOCP(=O)(O)O)n1
493485	1	CCCCCc1ccc(-c2cc3cn([C@H]4C[C@H](O)[C@@H](CO)O4)c(=O)nc3o2)cc1
493041	1	Nc1cc(=O)n(CCOCP(=O)(O)O)cn1
44582865	1	CCC/C=C/c1ccc(-c2cc3cn([C@H]4C[C@H](O)[C@@H](CO)O4)c(=O)nc3o2)cc1
135442218	1	CN(C)c1cc(=O)[nH]c(N)n1
493486	1	CCCCCCc1ccc(-c2cc3cn([C@H]4C[C@H](O)[C@@H](CO)O4)c(=O)nc3o2)cc1
493484	1	CCCCc1ccc(-c2cc3cn([C@H]4C[C@H](O)[C@@H](CO)O4)c(=O)nc3o2)cc1
145992929	1	CCCCCOC(=O)[C@@H](NP1(=O)COC(Cn2cnc3c(N)ncnc32)CO1)C(C)CC
145982337	1	CCCCCOC(=O)[C@H](CC(C)C)NP1(=O)COC(Cn2cnc3c(N)ncnc32)CO1
3011371	1	CCOC(=O)Cc1c(N)nc(N)n(CCOCP(=O)(O)O)c1=O
11460885	1	C=CCc1c(N)nc(N)n(CCOCP(=O)(O)O)c1=O
3011375	1	Nc1nc(N)n(CCOCP(=O)(O)O)c(=O)c1-c1ccccc1
3011374	1	Cc1c(N)nc(N)nc1OCCOCP(=O)(O)O
493059	1	Nc1cc(SCCOCP(=O)(O)O)nc(N)n1
3011369	1	N#CCc1c(N)nc(N)n(CCOCP(=O)(O)O)c1=O
3011370	1	N#CCc1c(N)nc(N)nc1OCCOCP(=O)(O)O
3011367	1	Nc1nc(N)n(CCOCP(=O)(O)O)c(=O)c1Cc1ccccc1
493055	1	Nc1nc(OCCOCP(=O)(O)O)cc(OCCOCP(=O)(O)O)n1
493056	1	Nc1nc(OCCOCP(=O)(O)O)cc(=O)n1CCOCP(=O)(O)O
493057	1	CC(C)OP(=O)(COCCSc1cc(N)nc(N)n1)OC(C)C
11255143	1	C=CCc1c(N)nc(N)nc1OCCOCP(=O)(O)O
3011381	1	Nc1nc(N)c(Br)c(OCCOCP(=O)(O)O)n1
3011380	1	Nc1nc(N)c(CC(=O)O)c(OCCOCP(=O)(O)O)n1
3011368	1	Nc1nc(N)c(Cc2ccccc2)c(OCCOCP(=O)(O)O)n1
3011376	1	Nc1nc(N)c(-c2ccccc2)c(OCCOCP(=O)(O)O)n1
3011379	1	Nc1nc(N)n(CCOCP(=O)(O)O)c(=O)c1CC(=O)O
145993616	1	CCCCCOC(=O)CC[C@H](NP1(=O)COC(Cn2cnc3c(N)ncnc32)CO1)C(=O)OCCCCC
667554	1	O=c1[nH]c(=O)n([C@H]2O[C@@H](CO)[C@H](O)[C@H]2O)cc1/C=C/Br
44582845	1	C/C=C/c1ccc(-c2cc3cn([C@H]4C[C@H](O)[C@@H](CO)O4)c(=O)nc3o2)cc1
9938296	1	CN(Cc1cc2c3c(c1)c(=O)c(C(=O)NCc1ccc(Cl)cc1)cn3CC(=O)N2C)C[C@@H](O)c1cc2ccccc2o1
145991894	1	CCCCCOC(=O)[C@H](CCSC)NP1(=O)COC(Cn2cnc3c(N)ncnc32)CO1
145981493	1	CCCCCOC(=O)[C@H](C)NP1(=O)COC(Cn2cnc3c(N)ncnc32)CO1
493490	1	CCCCCCCCc1cc2cn([C@H]3C[C@H](O)[C@@H](CO)O3)c(=O)nc2s1
136232617	1	CCCCCCCCCCCCCCCCOCCCOP1(=O)CO[C@@H](Cn2cnc3c(=O)[nH]c(N)nc32)CO1
51357702	1	CCCCCc1ccc(-c2cc3cn([C@H]4C[C@H](O)[C@@H](COC(=O)[C@H](C)NC(=O)[C@@H]5CCCN5C(=O)[C@@H](N)C(C)C)O4)c(=O)nc3o2)cc1
46200812	1	O=C(Nc1c(F)c(F)c(-c2cccc(OC(F)(F)F)c2)c(F)c1F)c1ccsc1C(=O)O
145987024	1	CCCCCOC(=O)[C@H](Cc1ccccc1)NP1(=O)COC(Cn2cnc3c(N)ncnc32)CO1
44440881	1	CN(Cc1cc2c(=O)c(C(=O)NCc3cccc(Cl)c3)cn(C)c2s1)C[C@@H](O)c1ccccn1
10239290	1	Cc1c(CN(C)C[C@@H](O)c2ccccn2)sc2c(=O)c(C(=O)NCc3ccc(Cl)cc3)cn(C)c12
3011378	1	Nc1nc(N)c(C2CC2)c(OCCOCP(=O)(O)O)n1
145991052	1	CCCCCOC(=O)[C@@H](NP1(=O)COC(Cn2cnc3c(N)ncnc32)CO1)C(C)C
145986727	1	CCCCCOC(=O)C[C@H](NP1(=O)COC(Cn2cnc3c(N)ncnc32)CO1)C(=O)OCCCCC
136263937	1	CCCCCCCCCCCCCCCCOCCCOP(=O)(O)CO[C@H](CO)Cn1cnc2c(=O)[nH]c(N)nc21
44432250	1	CN(CC1=CC2C(=O)C(C(=O)NCc3ccc(Cl)cc3)=CN(C)C2S1)C[C@@H](O)c1ccccn1
512291	1	NC(=O)c1cn([C@@H]2O[C@H](CO)[C@@H](O)[C@@H]2F)c2ncnc(N)c12
492105	1	C=CCCCCCCc1cc2cn([C@H]3C[C@H](O)[C@@H](CO)O3)c(=O)nc2o1
5272228	1	CC(NC(=S)Nc1ccc(NC(=O)c2ccccc2F)cc1)c1cc2ccccc2o1
156011488	1	CCCCCOC(=O)[C@@H](NP(=O)(CO[C@@H](CF)COc1nccc(N)n1)Oc1ccccc1)C(C)C
44393080	1	CC(NC(=S)Nc1ccc(-c2cc(-c3ccnc4ccccc34)no2)cc1)c1ccc(F)cc1
44393063	1	CC(NC(=S)Nc1ccc(-c2cc(Cc3ccccc3)no2)cc1)c1ccc(F)cc1
50925435	1	Cc1cn(C/C=C/CP(=O)(OCOC(=O)C(C)(C)C)OCOC(=O)C(C)(C)C)c(=O)[nH]c1=O
136252883	1	CCCCCCCCCCCCCCCCOCCCOP(=O)(O)CCOCCn1cnc2c(=O)[nH]c(N)nc21
90662949	1	CCc1ccc(-c2cc3cn([C@H]4C[C@H](O)[C@@H](CO)O4)c(=O)nc3s2)cc1
135839365	1	Nc1nc2c(ncn2C2CC(CO)C2CO)c(=O)[nH]1
164615035	1	CCCCCCCCCOc1ccc2c(c1)Nc1nc(=O)n([C@H]3C[C@H](O)[C@@H](CO)O3)cc1O2
5272225	1	CC(NC(=S)Nc1ccc(NC(=O)c2ccccc2F)cc1)c1ccc(Cl)cc1
135542257	1	Nc1nc2c(ncn2C[C@@H](CO)OCP(=O)(O)O)c(=O)[nH]1
16756756	1	CCCCc1ccc(-c2cc3cn([C@H]4C[C@H](O)[C@@H](CO)O4)c(=O)nc3o2)nc1
135480705	1	Nc1nc2c(ncn2C[C@H]2COP(=O)(O)CO2)c(=O)[nH]1
44393167	1	CC(NC(=S)Nc1ccc(NC(=O)c2ccccc2F)c(CONc2ccccc2)c1)c1ccc(F)cc1
51356299	1	CCCCCc1ccc(-c2cc3cn([C@H]4C[C@H](OC(=O)[C@@H](NC(=O)[C@@H]5CCCN5C(=O)[C@@H](N)C(C)C)C(C)C)[C@@H](COC(=O)[C@@H](NC(=O)[C@@H]5CCCN5C(=O)[C@@H](N)C(C)C)C(C)C)O4)c(=O)nc3o2)cc1
90662946	1	CCCCCCCc1ccc(-c2cc3cn([C@H]4C[C@H](O)[C@@H](CO)O4)c(=O)nc3s2)cc1
493480	1	O=c1nc2oc(-c3ccccc3)cc2cn1[C@H]1C[C@H](O)[C@@H](CO)O1
24748860	1	CCCCCc1ccc(-c2cc3cn([C@H]4C[C@H](O)[C@@H](CO)C4)c(=O)nc3o2)cc1
137639298	1	CCCCCCCCCCCCCCCCNC(=O)[C@@H](N)Cc1ccc(OP(=O)(COCCn2cnc(N)nc2=O)Oc2ccc(C[C@H](N)C(=O)NCCCCCCCCCCCCCCCC)cc2)cc1
9889676	1	CC(NC(=S)Nc1ccc(NC(=O)c2cc3ccccc3cn2)cc1)c1ccc(F)cc1
23179377	1	O=c1[nH]c(=O)n(C2CC(O)C(CO)S2)cc1CCCl
5272249	1	CC(NC(=S)Nc1ccc(NC(=O)c2ccccc2F)c(C#N)c1)c1cc2ccccc2o1
5272235	1	CC(NC(=S)Nc1ccc(NC(=O)c2ccccc2F)c(C#N)c1)c1ccc(F)cc1
53357717	1	CC(CP(=O)(O)O)OCCn1cnc2c(N)ncnc21
71508384	1	Nc1ncc(Br)c2c1ncn2[C@@H]1C[C@H](O)[C@@H](O)[C@H]1O
137291665	1	CCCCCOC(=O)C[C@H](NP(=O)(CO[C@@H](CF)Cn1cnc2c(=O)[nH]c(N)nc21)Oc1ccccc1)C(=O)OCCCCC
6439190	1	O=c1[nH]c(=O)n([C@H]2C[C@@H](CO)[C@H](O)C2)cc1/C=C/Br
44378733	1	O=c1[nH]c(=O)n([C@H]2CC(O)C(CO)S2)cc1CCF
5272236	1	Cc1cc(NC(=S)NC(C)c2ccc(F)cc2)ccc1NC(=O)c1ccccc1F
16756529	1	CCCCCc1ccc(-c2cc3cn([C@H]4C[C@H](O)[C@@H](CO)O4)c(=O)nc3o2)cn1
5272224	1	C[C@@H](NC(=S)Nc1ccc(NC(=O)c2ccccc2F)cc1)c1ccc(Br)cc1
135542177	1	Nc1nc2c(ncn2CC2(CO)CC2CO)c(=O)[nH]1
16756530	1	CCCCCCc1ccc(-c2cc3cn([C@H]4C[C@H](O)[C@@H](CO)O4)c(=O)nc3o2)cn1
6479195	1	O=c1[nH]c(=O)n([C@@H]2CO[C@H](CO)O2)cc1/C=C/Cl
454239	1	O=C1N[C@H]2[C@H](O)[C@H](O)[C@@H](O)C[C@@H]2c2cc3c(cc21)OCO3
25190991	1	CCCCCc1ccc(-c2cc3cn([C@H]4C[C@H](O)[C@@H](COC(=O)[C@@H](NC(=O)[C@@H]5CCCN5C(=O)[C@@H](N)C(C)C)C(C)C)O4)c(=O)nc3o2)cc1
137659149	1	CC(C)C(=O)OCOP(=O)(COCCOc1cc(N)nc(N)n1)OCOC(=O)C(C)C
44378784	1	O=c1[nH]c(=O)n([C@H]2CC(O)C(CO)S2)cc1C1CC1
71460121	1	COc1nc(N)nc2c1ncn2C/C=C/CP(=O)(OCOC(=O)C(C)(C)C)OCOC(=O)C(C)(C)C
122192834	1	O=C(Cn1c(=O)ccn(CCCCCCOc2ccc(Br)cc2)c1=O)Nc1ccc(Oc2ccccc2)cc1
65049	1	Cc1cn([C@@H]2O[C@H](CO)[C@@H](O)[C@@H]2O)c(=O)[nH]c1=O
9955646	1	CCOc1cc(NC(=S)NC(C)c2ccc(F)cc2)ccc1NC(=O)c1ccccc1F
16756757	1	CCCCCc1ccc(-c2cc3cn([C@H]4C[C@H](O)[C@@H](CO)O4)c(=O)nc3o2)nc1
5271138	1	CC(NC(=S)Nc1ccc(NC(=O)c2ccccc2F)cc1)c1ccc(F)cc1
53248687	1	Nc1ccn(C[C@@H](CO)OCP(=O)(O)OCCOCCOCCOCCOCCOCCO)c(=O)n1
11253110	1	Cc1cn(/C=C2/CC2(F)CO)c(=O)[nH]c1=O
44591202	1	NC1C=CN(/C=C2/CC2(F)CO)C(=O)N1
11206609	1	Nc1ccn(/C=C2/CC2(F)CO)c(=O)n1
45269251	1	O=c1c2ncn(CC3(CO)CC3CO)c2nc2[nH]c(-c3ccco3)cn12
53249145	1	CCOCCOCCOCCOCCOCCOCCOP(=O)(O)CO[C@H](CO)Cn1ccc(N)nc1=O
484046	1	O=C(NCc1ccc(Cl)cc1)c1c[nH]c2ccc(C#CCO)cc2c1=O
164614303	1	CCCCCCCCCCOc1ccc2c(c1)Nc1nc(=O)n([C@H]3C[C@H](O)[C@@H](CO)O3)cc1O2
507244	1	O=c1nc2oc(-c3ccc(Br)cc3)cc2cn1[C@H]1C[C@H](O)[C@@H](CO)O1
15958370	1	CCCCCCCCCCCCCCCCOCCCOP(=O)(O)COCCn1cnc2c(N)nc(N)nc21
45270933	1	O=c1c2ncn(CC3(CO)CC3CO)c2nc2[nH]c(-c3cccs3)cn12
16735236	1	C[Si](C)(C)C#Cc1cn([C@@H]2O[C@H](CO)[C@@H](O)[C@@H]2O)c(=O)[nH]c1=O
145965077	1	Cc1cn(C/C=C/C[P@](=O)(N[C@@H](C)C(=O)OCc2ccccc2)Oc2ccccc2)c(=O)[nH]c1=O
134382709	1	CCCCCOC(=O)C[C@H](NP(=O)(CO[C@@H](CF)COc1nccc(N)n1)Oc1ccccc1)C(=O)OCCCCC
145972873	1	Cc1cn(C/C=C/C[P@@](=O)(N[C@@H](C)C(=O)OCc2ccccc2)Oc2ccccc2)c(=O)[nH]c1=O
472370	1	Nc1ccn([C@@H]2CO[C@H](CO)[C@H]2CO)c(=O)n1
5272226	1	CC(NC(=S)Nc1ccc(NC(=O)c2ccccc2F)cc1)c1ccc(Br)cc1
164616264	1	CCCCCCCCOc1ccc2c(c1)Nc1nc(=O)n([C@H]3C[C@H](O)[C@@H](CO)O3)cc1O2
145976238	1	Cc1cn(C/C=C/CP(=O)(OCOC(=O)C(C)C)OCOC(=O)C(C)C)c(=O)[nH]c1=O
44378906	1	C/C=C/c1cn([C@H]2CC(O)C(CO)S2)c(=O)[nH]c1=O
493474	1	CCCCCCCCCCCc1cc2cn([C@H]3C[C@H](O)[C@@H](CO)O3)c(=O)nc2o1
22012706	1	CC(NC(=O)Nc1ccc(NC(=O)c2ccccc2F)c(C#N)c1)c1cc2ccccc2o1
5272242	1	COc1ccccc1C(=O)Nc1ccc(NC(=S)NC(C)c2ccc(F)cc2)cc1
137291676	1	CCCCCOC(=O)C[C@H](NP(=O)(CO[C@H](CF)Cn1cnc2c(=O)[nH]c(N)nc21)Oc1ccccc1)C(=O)OCCCCC
11169170	1	C[C@H](NP(=O)(OC[C@H]1O[C@@H](n2ccc(N)nc2=O)C(F)(F)[C@@H]1O)Oc1ccccc1)C(=O)OCc1ccccc1
493483	1	CCc1ccc(-c2cc3cn([C@H]4C[C@H](O)[C@@H](CO)O4)c(=O)nc3o2)cc1
492106	1	C=CCCCCCCCCc1cc2cn([C@H]3C[C@H](O)[C@@H](CO)O3)c(=O)nc2o1
513143	1	O=c1nc2oc(CCCCCCCCCOCC3CCCC3)cc2cn1[C@H]1C[C@H](O)[C@@H](CO)O1
90662950	1	CCCc1ccc(-c2cc3cn([C@H]4C[C@H](O)[C@@H](CO)O4)c(=O)nc3s2)cc1
10195634	1	CN(Cc1cc2c(=O)c(C(=O)NCc3ccc(Cl)cc3)cn(C)c2o1)C[C@@H](O)c1ccccn1
16756864	1	CCCC#Cc1ccc(-c2cc3cn([C@H]4C[C@H](O)[C@@H](CO)O4)c(=O)nc3o2)cn1
5272234	1	COc1cc(NC(=S)NC(C)c2ccc(F)cc2)ccc1NC(=O)c1ccccc1F
6474951	1	O=c1[nH]c(=O)n([C@@H]2CO[C@H](CO)O2)cc1/C=C/Br
5272232	1	CC(NC(=S)Nc1ccc(NC(=O)c2ccccc2F)c(C(F)(F)F)c1)c1ccc(F)cc1
145980504	1	CCCCCOC(=O)C[C@@H](NP1(=O)COC(Cn2cnc3c(N)ncnc32)CO1)C(=O)OCCCCC
5272222	1	C[C@@H](NC(=S)Nc1ccc(NC(=O)c2ccccc2F)cc1)c1ccccc1
5272233	1	CC(NC(=S)Nc1cc(Br)c(NC(=O)c2ccccc2F)c(Br)c1)c1ccc(F)cc1
10072152	1	CC(NC(=S)Nc1ccc(NC(=O)c2ccc3ccccc3n2)cc1)c1ccc(F)cc1
10066295	1	[N-]=[N+]=NC(CCl)c1cn([C@@H]2O[C@H](CO)[C@@H](O)[C@@H]2O)c(=O)[nH]c1=O
507243	1	O=c1nc2oc(-c3ccc(Cl)cc3)cc2cn1[C@H]1C[C@H](O)[C@@H](CO)O1
10185854	1	O=C(NCc1ccc(Cl)cc1)c1cn2c(COCCO)cc3cc(CN4CCOCC4)cc(c1=O)c32
493633	0	O=C1NS(=O)(=O)N(COCc2ccccc2)c2ccccc21
493628	0	O=C1c2ccccc2NS(=O)(=O)N1COCCO
493632	0	CCCOCN1c2ccccc2C(=O)NS1(=O)=O
493627	0	C#CCOCN1C(=O)c2ccccc2NS1(=O)=O
493636	0	O=C1NS(=O)(=O)N(COCCO)c2ccccc21
466143	0	C#CCOCN1c2ccccc2C(=O)N(Cc2ccccc2)S1(=O)=O
135976849	0	Nc1nc2c(ncn2C2C=CC(CO)C(O)C2)c(=O)[nH]1
466142	0	O=C1c2ccccc2N(COCc2ccccc2)S(=O)(=O)N1Cc1ccccc1
44276333	0	O=c1[nH]c(=O)n(C2SC(O)C(O)C2O)cc1Cl
493062	0	CSc1nc(N)cc(OCCOCP(=O)(O)O)n1
493625	0	CC(=O)OCCOCN1C(=O)c2ccccc2NS1(=O)=O
493631	0	CC(=O)OCCOCN1c2ccccc2C(=O)N(Cc2ccccc2)S1(=O)=O
513266	0	Nc1ncnc2c1nnn2C[C@@H](CF)OCP(=O)(O)O
135435074	0	Nc1nc2c(nnn2CCOCP(=O)(O)O)c(=O)[nH]1
135483761	0	Nc1nc2nn(CCOCP(=O)(O)O)nc2c(=O)[nH]1
493052	0	CN(C)c1cc(=O)n(CCOCP(=O)(O)O)c(N)n1
455705	0	Nc1ncnc2nn(CCOCP(=O)(O)O)nc12
513272	0	Nc1nc(N)c2nnn(C[C@H](O)CO)c2n1
493047	0	Cc1cc(OCCOCP(=O)(O)O)nc(N)n1
493629	0	O=C1c2ccccc2NS(=O)(=O)N1Cc1ccccc1
72828	0	Nc1ccn([C@@H]2C=C(CO)[C@@H](O)[C@H]2O)c(=O)n1
493044	0	Nc1cc(=O)n(CCOCP(=O)(O)O)c(N)n1
135509791	0	Nc1nc(NC2CC2)cc(=O)[nH]1
493046	0	Cc1cc(=O)n(CCOCP(=O)(O)O)c(N)n1
44276345	0	O=c1[nH]c(=O)n(C2SC(O)C(O)C2O)cc1F
135668177	0	Nc1nc2c(ncn2COC(O)CCO)c(=O)[nH]1
44276267	0	O=c1[nH]c(=O)n(C2SC(O)C(O)C2O)cc1Br
493043	0	Nc1cc(OCCOCP(=O)(O)O)ncn1
493060	0	C[C@H](COc1cc(N)nc(N)n1)OCP(=O)(O)O
6312482	0	Nc1ncnc2c1ncn2/C=C1/CC1CO
6531437	0	Nc1ncnc2c1ncn2/C=C1\CC1CO
493061	0	C[C@@H](COc1cc(N)nc(N)n1)OCP(=O)(O)O
513270	0	Nc1ncnc2c1nnn2C[C@H](O)CO
135431272	0	Nc1cc(=O)[nH]cn1
493637	0	O=C(OCCOCN1c2ccccc2C(=O)N(Cc2ccccc2)S1(=O)=O)c1ccccc1
44337954	0	CC(C)(C)c1cn2c(=O)c3c(nc2[nH]1)N(COC(CO)CO)CN3
493634	0	CC(=O)OCCOCN1c2ccccc2C(=O)NS1(=O)=O
493626	0	O=C1c2ccccc2NS(=O)(=O)N1COCc1ccccc1
493635	0	O=C1c2ccccc2N(COCCO)S(=O)(=O)N1Cc1ccccc1
512367	0	Cc1ccn2c(CSCc3ccccc3)c(C)nc2c1
491419	0	Cc1cccn2c(CSCc3ccccc3)cnc12
512358	0	Cc1ccn2c(CSCc3ccccc3Cl)cnc2c1
512366	0	Cc1cccn2c(CSCc3ccccc3)c(-c3ccccc3)nc12
512361	0	FC(F)(F)c1cc(Cl)c2ncc(CSCc3ccccc3)n2c1
512362	0	Cc1ccc2ncc(CSCc3ccccc3)n2c1
501927	0	Cc1c(Br)cc(Br)c2ncc(CSCc3ccccc3)n12
491418	0	Cc1ccn2c(CSCc3ccccc3)cnc2c1
513267	0	Nc1ncnc2nn(C[C@@H](CF)OCP(=O)(O)O)nc12
5496275	0	C[C@H](Cn1nc2nc(N)nc(N)c2n1)OCP(=O)(O)O
513258	0	Nc1nc(N)c2nnn(C[C@@H](CO)OCP(=O)(O)O)c2n1
5496273	0	C[C@H](Cn1nnc2c(N)ncnc21)OCP(=O)(O)O
455703	0	Nc1ncnc2c1nnn2CCOCP(=O)(O)O
513256	0	Nc1nc(N)c2nnn(CCOCP(=O)(O)O)c2n1
5496274	0	C[C@H](Cn1nc2ncnc(N)c2n1)OCP(=O)(O)O
512363	0	Cc1ccc(C)n2c(CSCc3ccccc3)cnc12
512368	0	Cc1nc2ccccn2c1CSCc1ccccc1
512355	0	Cc1ccn2c(CSCCc3ccccc3)cnc2c1
512365	0	Cc1ccn2c(CSCc3ccccc3)c(-c3ccccc3)nc2c1
491420	0	Cc1cc(Br)cn2c(CSCc3ccccc3)cnc12
512364	0	Cc1cc(Br)c2ncc(CSCc3ccccc3)n2c1
512359	0	Cc1ccn2c(CSCc3ccc(Cl)cc3)cnc2c1
44338098	0	O=c1c2c(nc3[nH]c(-c4ccc(-c5ccccc5)cc4)cn13)N(COC(CO)CO)CN2
54729986	0	O=c1c(F)c(O)ccn1[C@@H]1O[C@H](CO)[C@@H](O)[C@H]1O
489670	0	[N-]=[N+]=NC1C(Cl)C(=O)NC(=O)N1[C@H]1C[C@H](O)[C@@H](CO)O1
65510	0	O=c1[nH]c(=O)n([C@H]2C[C@H](O)[C@@H](CO)O2)cc1Cl
3385	0	O=c1[nH]cc(F)c(=O)[nH]1
482497	0	Cc1cn([C@H]2S[C@H](CO)[C@@H](O)[C@@H]2O)c(=O)[nH]c1=O
5282192	0	O=c1[nH]c(=O)n([C@@H]2O[C@H](CO)[C@@H](O)[C@@H]2O)cc1/C=C/Br
21704	0	Nc1ncnc2c1ncn2[C@@H]1O[C@H](CO)[C@@H](O)[C@@H]1O
10715151	0	O=c1[nH]c(=O)n([C@H]2S[C@H](CO)[C@@H](O)[C@@H]2O)cc1I
482505	0	Nc1ncnc2c1ncn2[C@@H]1S[C@H](CO)[C@@H](O)[C@@H]1O
6475799	0	O=c1[nH]c(=O)n([C@@H]2S[C@H](CO)[C@@H](O)[C@@H]2O)cc1/C=C/Br
5274348	0	CCc1cn([C@@H]2S[C@H](CO)[C@@H](O)[C@@H]2O)c(=O)[nH]c1=O
489672	0	CC1(Cl)C(=O)NC(=O)N([C@H]2C[C@H](O)[C@@H](CO)O2)C1N=[N+]=[N-]
3011377	0	Nc1nc(N)n(CCOCP(=O)(O)O)c(=O)c1C1CC1
512356	0	Cc1ccn2c(CSC3CCCC3)cnc2c1
3011373	0	Cc1c(N)nc(N)n(CCOCP(=O)(O)O)c1=O
3011382	0	Nc1nc(N)c(Cl)c(OCCOCP(=O)(O)O)n1
135499552	0	Nc1nc2c(ncn2OCC/C=C\P(=O)(O)O)c(=O)[nH]1
6474330	0	Nc1nc(N)c2ncn(CC/C=C/P(=O)(O)O)c2n1
6474323	0	Nc1ncnc2c1ncn2OCC/C=C/P(=O)(O)O
6474311	0	Nc1ncnc2c1ncn2CC/C=C/P(=O)(O)O
482507	0	Nc1nc(N)c2ncn([C@@H]3S[C@H](CO)[C@@H](O)[C@@H]3O)c2n1
482506	0	Nc1nc(N)c2ncn([C@H]3S[C@H](CO)[C@@H](O)[C@@H]3O)c2n1
135398592	0	Nc1nc2c(ncn2[C@H]2C[C@H](O)[C@@H](CO)O2)c(=O)[nH]1
54729987	0	O=c1c(F)c(O)ccn1[C@H]1C[C@H](O)[C@@H](CO)O1
42637244	0	O=C1N([C@@H]2O[C@H](CO)[C@@H](O)[C@H]2O)C=CC(O)(c2ccccc2)C1(F)F
25197642	0	COC(=O)[C@H](C)NP(=O)(OCCCNC(=O)C(C)c1ccc(CC(C)C)cc1)Oc1ccc(Cl)cc1
25197514	0	COC(=O)[C@H](C)NP(=O)(OCCCNC(=O)C(C)c1cccc(Oc2ccccc2)c1)Oc1ccc(Cl)cc1
6478043	0	O=c1[nH]c(=O)n([C@@H]2O[C@H](CO)[C@@H](O)[C@H]2O)cc1/C=C/Br
9841193	0	C[C@]1(CO)O[C@@H](n2cc(/C=C/Br)c(=O)[nH]c2=O)C[C@@H]1O
90663531	0	C[C@@]1(CO)O[C@H](n2ccc(N)nc2=O)C[C@H]1O
46877020	0	C[C@]1(CO)OC(n2cc(/C=C/Br)c(=O)[nH]c2=O)[C@H](O)[C@@H]1O
44565555	0	CC(C(=O)NCCCO)c1cccc(Oc2ccccc2)c1
24282881	0	O=C(Cc1ccccc1Nc1c(Cl)cccc1Cl)NCCCO
25197644	0	COC(=O)[C@H](C)NP(=O)(OCCCNC(=O)C(C)c1cccc(C(=O)c2ccccc2)c1)Oc1ccc(Cl)cc1
25197643	0	COC(=O)[C@H](C)NP(=O)(OCCCNC(=O)Cc1c(C)n(C(=O)c2ccc(Cl)cc2)c2ccc(OC)cc12)Oc1ccc(Cl)cc1
24285940	0	CC(C)Cc1ccc(C(C)C(=O)NCCCO)cc1
25197645	0	COC(=O)[C@H](C)NP(=O)(OCCCNC(=O)Cc1ccccc1Nc1c(Cl)cccc1Cl)Oc1ccc(Cl)cc1
44565556	0	CC(C(=O)NCCCO)c1cccc(C(=O)c2ccccc2)c1
11546127	0	COc1ccc2c(c1)c(CC(=O)NCCCO)c(C)n2C(=O)c1ccc(Cl)cc1
451656	0	Nc1ncnc2c1ncn2[C@@H]1C[C@H](CO)[C@H]1CO
135453973	0	Nc1nc2c(ncn2[C@@H]2S[C@H](CO)[C@@H](O)[C@@H]2O)c(=O)[nH]1
97188	0	Nc1nc(N)c2ncn([C@H]3C[C@H](O)[C@@H](CO)O3)c2n1
6475797	0	O=c1[nH]c(=O)n([C@H]2S[C@H](CO)[C@@H](O)[C@@H]2O)cc1/C=C/Cl
482498	0	Cc1cn([C@@H]2S[C@H](CO)[C@@H](O)[C@@H]2O)c(=O)[nH]c1=O
482504	0	Nc1ncnc2c1ncn2[C@H]1S[C@H](CO)[C@@H](O)[C@@H]1O
6532420	0	O=c1[nH]c(=O)n([C@H]2S[C@H](CO)[C@@H](O)[C@@H]2O)cc1/C=C/Br
6475798	0	O=c1[nH]c(=O)n([C@@H]2S[C@H](CO)[C@@H](O)[C@@H]2O)cc1/C=C/Cl
482499	0	O=c1[nH]c(=O)n([C@@H]2S[C@H](CO)[C@@H](O)[C@@H]2O)cc1I
482495	0	CCc1cn([C@H]2S[C@H](CO)[C@@H](O)[C@@H]2O)c(=O)[nH]c1=O
512360	0	CCCSCc1cnc2cc(C)ccn12
42637318	0	C#CC1(O)C=CN([C@H]2C[C@H](O)[C@@H](CO)O2)C(=O)C1(F)F
44337871	0	Cc1cn2c(=O)c3c(nc2[nH]1)N(COCCO)CN3
10738995	0	CC(C)OP(=O)(CO[C@H](CO)Cn1nc2ncnc(N)c2n1)OC(C)C
513261	0	C[C@H](Cn1nnc2c(N)nc(N)nc21)OCP(=O)(O)O
513269	0	Nc1nc(N)c2nn(C[C@@H](CF)OCP(=O)(O)O)nc2n1
513257	0	Nc1ncnc2nn(C[C@@H](CO)OCP(=O)(O)O)nc12
135480698	0	C[C@H](Cn1nc2nc(N)[nH]c(=O)c2n1)OCP(=O)(O)O
44338200	0	O=c1c2c(nc3[nH]c(-c4ccc(-c5ccccc5)cc4)cn13)N(COCCO)CN2
44337953	0	Cc1cn2c(=O)c3c(nc2[nH]1)N(COCCO)C(Br)N3
44337972	0	Cc1cnc2[nH]c3c(c(=O)n12)NCN3COCCO
44337969	0	O=c1c2c(nc3[nH]c(-c4ccc(Br)cc4)cn13)N(COCCO)CN2
44338097	0	O=c1c2c(nc3[nH]c(-c4ccccc4)cn13)N(COC(CO)CO)CN2
44338214	0	O=c1c2c(nc3[nH]c(-c4ccccc4)cn13)N(COCCO)CN2
44337881	0	Cc1cn2c(=O)c3c(nc2[nH]1)N(COC(CO)CO)CN3
44337950	0	CC(C)(C)c1cn2c(=O)c3c(nc2[nH]1)N(COCCO)CN3
135400980	0	C[C@@H](Cn1nnc2c(=O)[nH]c(N)nc21)OCP(=O)(O)O
513268	0	Nc1nc(N)c2nnn(C[C@@H](CF)OCP(=O)(O)O)c2n1
42637316	0	CC1(O)C=CN([C@H]2C[C@H](O)[C@@H](CO)O2)C(=O)C1(F)F
42638110	0	NC(=O)Cc1ccn([C@@H]2O[C@H](CO)[C@@H](O)[C@@H]2O)c(=O)c1F
42637164	0	NC(=O)Cc1ccn([C@H]2C[C@H](O)[C@@H](CO)O2)c(=O)c1F
42637317	0	O=C1N([C@H]2C[C@H](O)[C@@H](CO)O2)C=CC(O)(c2ccccc2)C1(F)F
42637243	0	CC1(O)C=CN([C@@H]2O[C@H](CO)[C@@H](O)[C@H]2O)C(=O)C1(F)F
135480697	0	C[C@H](Cn1nnc2c(=O)[nH]c(N)nc21)OCP(=O)(O)O
10587450	0	Cc1ccn2c(CSC3CCCCC3)cnc2c1
513271	0	Nc1ncnc2nn(C[C@H](O)CO)nc12
512357	0	Cc1ccn2c(CSCC(F)(F)F)cnc2c1
4472114	0	O=c1[nH]c(=O)n(C2COC(CO)C(O)C2)cc1I
10019889	0	C=Cc1ccc(-c2cn([C@H]3C[C@H](O)[C@@H](CO)O3)c(=O)[nH]c2=O)s1
512323	0	O=c1[nH]c(=O)n([C@H]2C[C@H](O)[C@@H](CO)O2)cc1-c1cccs1
10409079	0	C[Si](C)(C)C#Cc1ccc(-c2cn([C@H]3C[C@H](O)[C@@H](CO)O3)c(=O)[nH]c2=O)s1
10316159	0	O=c1[nH]c(=O)n([C@H]2C[C@H](O)[C@@H](CO)O2)cc1-c1ccc([N+](=O)[O-])s1
46876720	0	O=c1[nH]c(=O)n(C2O[C@H](CO)[C@@H](O)[C@@H]2O)cc1-c1ccc(Cl)s1
46876710	0	O=c1[nH]c(=O)n(C2O[C@H](CO)[C@@H](O)[C@@H]2O)cc1-c1ccc(Br)s1
10382215	0	C#Cc1ccc(-c2cn([C@H]3C[C@H](O)[C@@H](CO)O3)c(=O)[nH]c2=O)s1
10094536	0	O=c1[nH]c(=O)n([C@H]2C[C@H](O)[C@@H](CO)O2)cc1-c1ccc(I)s1
515211	0	Cc1ccc(-c2cn([C@H]3C[C@H](O)[C@@H](CO)O3)c(=O)[nH]c2=O)s1
515215	0	O=c1[nH]c(=O)n([C@H]2C[C@H](O)[C@@H](CO)O2)cc1-c1ccoc1
515213	0	O=c1[nH]c(=O)n([C@H]2C[C@H](O)[C@@H](CO)O2)cc1-c1ccsc1
5905	0	O=c1[nH]c(=O)n([C@H]2C[C@H](O)[C@@H](CO)O2)cc1I
22910966	0	Nc1ccn(C2COC(CO)C(O)C2)c(=O)n1
135450943	0	Nc1nc2c(ncn2[C@@H]2CO[C@H](CO)[C@@H](O)C2)c(=O)[nH]1
492032	0	Nc1ncnc2c1ncn2[C@@H]1CO[C@H](CO)[C@@H](O)C1
22910962	0	Cc1cn(C2COC(CO)C(O)C2)c(=O)[nH]c1=O
515216	0	O=c1[nH]c(=O)n([C@H]2C[C@H](O)[C@@H](CO)O2)cc1-c1ccno1
3003375	0	COc1cc(OC)c(NC(=S)Nc2ccc(NC(C)=O)cc2)cc1Cl
3003376	0	COc1cc(OC)c(NC(=S)Nc2ccc(NC(=O)c3ccco3)cc2)cc1Cl
3006476	0	COc1cc(OC)c(NC(=S)Nc2ccc(NC(=O)c3ccco3)cc2C(F)(F)F)cc1Cl
3006469	0	O=C(Nc1ccc(NC(=S)Nc2cccc(C(F)(F)F)c2)cc1)c1ccco1
3006466	0	Cc1ccc(NC(=S)Nc2ccc(NC(=O)c3ccco3)cc2)cc1Cl
3003386	0	O=C(Nc1ccc(NC(=S)Nc2cc(C(F)(F)F)cc(C(F)(F)F)c2)cc1)c1cscn1
3006481	0	O=C(Nc1ccc(NC(=S)Nc2ccc(C(F)(F)F)c(Cl)c2)cc1)c1cscn1
3006480	0	O=C(Nc1ccc(NC(=S)Nc2cc(C(F)(F)F)cc(C(F)(F)F)c2)cc1)c1cocn1
3006472	0	COc1cc(OC)c(NC(=S)Nc2ccc(NC(=O)c3ccco3)c(OC)c2)cc1Cl
135446903	0	Nc1nc2c(ncn2COC[C@@H](O)CO)c(=O)[nH]1
135446904	0	Nc1nc2c(ncn2COC[C@H](O)CO)c(=O)[nH]1
135446919	0	Nc1nc2c(ncn2COCC(O)CO)c(=O)[nH]1
44277171	0	Cn1c[n+](COCCO)c2nc(N)nc([O-])c21.O=S(=O)(O)O
481076	0	Cc1cn2c(=O)c3ncn(COCCO)c3nc2[nH]1
5270680	0	Cc1cn2c(=O)c3ncn(COCCO)c3nc2n1C
135435032	0	CNc1nc2c(ncn2COCCO)c(=O)[nH]1
5270677	0	Cn1c(N)nc2c(ncn2COCCO)c1=O
3006473	0	COc1cc(OC)c(NC(=S)Nc2ccc(NC(=O)c3ccco3)cc2C)cc1Cl
3006478	0	O=C(Nc1ccc(NC(=S)Nc2ccc(C(F)(F)F)c(Cl)c2)cc1)c1ccccn1
3006463	0	CCC(=O)Nc1ccc(NC(=S)Nc2cc(Cl)c(OC)cc2OC)cc1
3006474	0	COc1cc(OC)c(NC(=S)Nc2ccc(NC(=O)c3ccco3)c(C)c2)cc1Cl
497006	0	O=[N+]([O-])c1cccc(S(=O)(=O)n2c(CCc3ccccn3)nc3cc(Cl)c(Cl)cc32)c1
497000	0	O=[N+]([O-])c1ccc(S(=O)(=O)n2c(CCc3ccccn3)nc3cc(Cl)c(Cl)cc32)cc1
497001	0	CC(C)S(=O)(=O)n1c(CCc2ccccn2)nc2ccccc21
497009	0	COC(=O)c1nc2ccccc2n1S(=O)(=O)c1ccccc1[N+](=O)[O-]
497005	0	O=[N+]([O-])c1cccc(S(=O)(=O)n2c(CCc3ccccn3)nc3ccccc32)c1
497004	0	O=[N+]([O-])c1ccc(S(=O)(=O)n2c(CCc3ccccn3)nc3cc(Cl)c(Cl)cc32)c([N+](=O)[O-])c1
15954710	0	COc1cc(OC)c(NC(=S)Nc2ccc(NC(=O)c3ccccc3)cc2)cc1Cl
497007	0	COC(=O)c1nc2ccccc2n1S(=O)(=O)c1ccc([N+](=O)[O-])cc1
3006467	0	O=C(Nc1ccc(NC(=S)Nc2ccc(Cl)c(C(F)(F)F)c2)cc1)c1ccco1
3006479	0	O=C(Nc1ccc(NC(=S)Nc2ccc(C(F)(F)F)c(Cl)c2)cc1)c1cocn1
3006477	0	COc1cc(OC)c(NC(=S)Nc2cc(OC)c(NC(=O)c3ccco3)cc2OC)cc1Cl
3006475	0	COc1cc(OC)c(NC(=S)Nc2ccc(NC(=O)c3ccco3)cc2C#N)cc1Cl
3006470	0	O=C(Nc1ccc(NC(=S)Nc2cc(C(F)(F)F)cc(C(F)(F)F)c2)cc1)c1ccco1
3006468	0	O=C(Nc1ccc(NC(=S)Nc2ccc(F)c(Cl)c2)cc1)c1ccco1
3006471	0	Cc1cccc(NC(=S)Nc2ccc(NC(=O)c3ccco3)cc2)c1
3003383	0	O=C(Nc1ccc(NC(=S)Nc2cc(C(F)(F)F)cc(C(F)(F)F)c2)cc1)c1csnn1
3006465	0	O=C(Nc1ccc(NC(=S)Nc2ccccc2)cc1)c1ccco1
5270681	0	Cc1cn2c([O-])c3c(nc2n1)[n+](COCCO)cn3C
44304707	0	COP(=O)(O)C(CO)Cn1cnc2c(N)nc(C)nc21
512350	0	CC1(C)CCCN1CC12CC3CC(CC(C3)C1)C2
10398047	0	C1CCC2(NC1)C1CC3CC(C1)CC2C3
10489838	0	CCN1CCCCC12C1CC3CC(C1)CC2C3
10331033	0	CN1CCCCC12C1CC3CC(C1)CC2C3
512342	0	CCCCN1CCCC1C12CC3CC(CC(C3)C1)C2
44340684	0	CN(C)C[C@H]1CCC(C23CC4CC(CC(C4)C2)C3)[C@H]1c1ccccc1
512344	0	CNC1(C23CC4CC(CC(C4)C2)C3)CCCC1
10846006	0	C1COCC2(N1)C1CC3CC(C1)CC2C3
512345	0	CN(C)C1(C23CC4CC(CC(C4)C2)C3)CCCC1
512351	0	C1CCC2(C1)CCCN2CC12CC3CC(CC(C3)C1)C2
511811	0	C1CNC(C23CC4CC(CC(C4)C2)C3)C1
512341	0	CCN1CCCC1C12CC3CC(CC(C3)C1)C2
512343	0	NC1(C23CC4CC(CC(C4)C2)C3)CCCC1
512352	0	C1CCC2(CC1)CCCN2CC12CC3CC(CC(C3)C1)C2
44340940	0	CN(C)C[C@@H]1CCC(C23CC4CC(CC(C4)C2)C3)[C@H]1c1ccccc1
512340	0	CN1CCCC1C12CC3CC(CC(C3)C1)C2
512353	0	CC(C)(C)C1CCCN1CC12CC3CC(CC(C3)C1)C2
511742	0	Cc1cccc2ncc(CSCCO)n12
511749	0	Cc1cccc2ncc(CSCC(C)O)n12
511751	0	Cc1c(Br)c(C)n2c(CSCc3ccccc3)cnc2c1Br
511740	0	COC(=O)c1nc2ccccn2c1CSCCO
511746	0	CCSCc1cnc2c(C)cccn12
326951	0	OCCSCc1cnc2ccccn12
511743	0	Cc1ccn2c(CSCC(C)O)cnc2c1
511754	0	Cc1c(Br)cn2c(CSCCO)cnc2c1Br
511748	0	Cc1cccn2c(CSCCO)cnc12
511741	0	CCSCc1cnc2cc(C)ccn12
511745	0	Cc1c(Br)cn2c(CSCc3ccccc3)cnc2c1Br
511756	0	Cc1ccn2c(CSCCCO)cnc2c1
511750	0	Cc1cccc2ncc(CSCC(O)CO)n12
511744	0	Cc1ccn2c(CSCC(O)CO)cnc2c1
37542	0	NC(=O)c1ncn([C@@H]2O[C@H](CO)[C@@H](O)[C@H]2O)n1
511755	0	OCCCSCc1cnc2c(Cl)cc(C(F)(F)F)cn12
511758	0	CC(O)CSCc1cnc2ncccn12
511757	0	c1ccc(CSCc2cnc3ncccn23)cc1
511753	0	CCOC(=O)CSCc1cnc2cc(C)ccn12
511752	0	Cc1c(Br)c(C)n2c(CSCCO)cnc2c1Br
71525012	0	O=c1ccn(CCOc2ccc(Cl)cc2)c(=O)n1Cc1ccccc1
5304848	0	O=c1ccn(CCOc2ccc3ccccc3c2)c(=O)n1Cc1ccccc1
71525015	0	Cc1ccc(OCCn2ccc(=O)n(Cc3ccccc3)c2=O)cc1C
5306011	0	Cc1ccc(Cn2c(=O)ccn(CCOc3ccc(C)cc3)c2=O)cc1
5306012	0	Cc1ccc(OCCn2ccc(=O)n(C(C)c3ccccc3)c2=O)cc1
5306010	0	CC(C)(C)c1ccc(OCCn2ccc(=O)n(Cc3ccccc3)c2=O)cc1
71525138	0	O=c1ccn(C/C=C/c2ccccc2)c(=O)n1Cc1cccc2ccccc12
5306016	0	Cc1ccc(OCCn2ccc(=O)n(Cc3cc(C)cc(C)c3)c2=O)cc1
71525136	0	O=c1ccn(C/C=C/c2ccccc2)c(=O)n1Cc1cc(Br)cc(Br)c1
71525097	0	Cc1cc(C)cc(Cn2c(=O)ccn(C/C=C/c3ccccc3)c2=O)c1
5302094	0	Cc1ccc(OCCn2cc(C)c(=O)n(Cc3ccccc3)c2=O)cc1
71524969	0	O=c1ccn(CCOc2ccccc2)c(=O)n1Cc1ccccc1
71525054	0	Cc1cc(C)cc(OCCn2ccc(=O)n(Cc3ccccc3)c2=O)c1
5303134	0	Cc1ccc(OCCn2ccc(=O)n(Cc3cc(C)ccc3C)c2=O)cc1
71525057	0	Cc1ccc(OCCn2ccc(=O)n(Cc3c(C)cc(C)cc3C)c2=O)cc1
71525011	0	O=c1ccn(CCOc2ccc(-c3ccccc3)cc2)c(=O)n1Cc1ccccc1
71525134	0	O=c1ccn(C/C=C/c2ccccc2)c(=O)n1Cc1cc(F)cc(F)c1
71525137	0	Cc1cc(Br)cc(Cn2c(=O)ccn(C/C=C/c3ccccc3)c2=O)c1
71525014	0	N#Cc1ccc(OCCn2ccc(=O)n(Cc3ccccc3)c2=O)cc1
71525010	0	Cc1ccc(OCCn2ccc(=O)n(Cc3ccccc3)c2=O)cc1
71525013	0	O=c1ccn(CCOc2ccc(F)cc2)c(=O)n1Cc1ccccc1
71525096	0	O=c1ccn(C/C=C/c2ccccc2)c(=O)n1Cc1ccccc1
136232613	0	CCCCCCCCCCCCCCCCOCCCOP(=O)(CCOCCn1cnc2c(=O)[nH]c(N)nc21)OCCCOCCCCCCCCCCCCCCCC
136232615	0	CCCCCCCCCCCCCCCCOCCCOP(=O)(O)CO[C@H](CO)Cn1cnc2c(=O)[nH]cnc21
136232614	0	CCCCCCCCCCCCCCCCOCCCOP(=O)(CO[C@H](CO)Cn1cnc2c(=O)[nH]cnc21)OCCCOCCCCCCCCCCCCCCCC
136232612	0	CCCCCCCCCCCCCCCCOCCCOP(=O)(CCOCCn1cnc2c(=O)[nH]cnc21)OCCCOCCCCCCCCCCCCCCCC
136232616	0	CCCCCCCCCCCCCCCCOCCCOP1(=O)CO[C@@H](Cn2cnc3c(=O)[nH]cnc32)CO1
136276914	0	CCCCCCCCCCCCCCCCOCCCOP(=O)(O)CCOCCn1cnc2c(=O)[nH]cnc21
71525055	0	Cc1ccc(OCCn2ccc(=O)n(Cc3ccccc3C)c2=O)cc1
71525095	0	Cc1ccc(OCCn2c(=O)n(Cc3ccccc3)c(=O)c3ccccc32)cc1
54729988	0	O=c1c(F)c(O)ccn1[C@@H]1O[C@H](CO)[C@@H](O)[C@@H]1O
71525056	0	Cc1ccc(OCCn2ccc(=O)n(Cc3cccc(C)c3)c2=O)cc1
71723318	0	C[C@H](O)C[C@H]1C[C@@H](n2cnc3c(N)ncnc32)[C@H](O)[C@@H]1O
71723319	0	C[C@@H](O)C[C@H]1C[C@@H](n2cnc3c(N)ncnc32)[C@H](O)[C@@H]1O
71722437	0	Cc1ccc(OCCCCCn2ccc(=O)[nH]c2=O)cc1
71722569	0	O=c1ccn(CCCCCOc2ccc(-c3ccccc3)cc2)c(=O)[nH]1
71722724	0	O=C(O)c1ccc(OCCCCCn2ccc(=O)[nH]c2=O)cc1
71722720	0	O=c1ccn(CCCOc2ccc(Br)cc2)c(=O)[nH]1
71722572	0	O=c1ccn(CCCCCOc2ccc(Cl)cc2)c(=O)[nH]1
71722435	0	Cc1ccccc1OCCCCCn1ccc(=O)[nH]c1=O
73350964	0	COc1ccc(-c2cc3cn(C4CC(CO)N(C)O4)c(=O)nc3o2)cc1
73347859	0	CCCCCc1ccc(-c2cc3cn(C4CC(CO)N(C)O4)c(=O)nc3o2)cc1
73350965	0	CN1OC(n2cc3cc(-c4ccccc4)oc3nc2=O)CC1CO
73352434	0	CN1OC(n2cc3ccoc3nc2=O)CC1CO
73355443	0	CCCc1cc2cn(C3CC(CO)N(C)O3)c(=O)nc2o1
71466640	0	C/C(=N\NC(=O)COc1cccc2ccccc12)c1ccc(C#N)cc1Br
9590064	0	C/C(=N\NC(=O)COc1cccc2ccccc12)c1ccccc1
136183922	0	COc1cc(/C=N/NC(=O)COc2cccc3ccccc23)cc(OC)c1O
76333932	0	C/C(=N\NC(=O)COc1cccc2ccccc12)c1ccccc1Br
9617358	0	O=C(COc1cccc2ccccc12)N/N=C/c1cccc(O)c1
71722571	0	CCCOC(=O)c1ccc(OCCCCCn2ccc(=O)[nH]c2=O)cc1
71722725	0	Nc1ccc(OCCCCCn2ccc(=O)[nH]c2=O)cc1
71722570	0	N#Cc1ccc(OCCCCCn2ccc(=O)[nH]c2=O)cc1
71722722	0	O=c1ccn(CCCCCCOc2ccc(Br)cc2)c(=O)[nH]1
71525135	0	O=c1ccn(C/C=C/c2ccccc2)c(=O)n1Cc1cc(Cl)cc(Cl)c1
71524970	0	Cc1ccccc1OCCn1ccc(=O)n(Cc2ccccc2)c1=O
71524971	0	Cc1cccc(OCCn2ccc(=O)n(Cc3ccccc3)c2=O)c1
5306013	0	Cc1ccc(OCCn2ccc(=O)n(CCc3ccccc3)c2=O)cc1
71524787	0	CCCCCCCCCCCCCCCCOCCCOP(=O)([O-])CO[C@H](C)Cn1cnc2c(N)nc(N)nc21.[Na+]
71508433	0	Cc1cnc(N)c2ncn([C@@H]3C[C@H](O)[C@@H](O)[C@H]3O)c12
71722439	0	CC(C)c1ccc(OCCCCCn2ccc(=O)[nH]c2=O)cc1
71722719	0	Cc1cn(CCCCCOc2ccc(Br)cc2)c(=O)[nH]c1=O
71722574	0	O=c1ccn(CCCCCOc2ccc([N+](=O)[O-])cc2)c(=O)[nH]1
71722434	0	O=c1ccn(CCCCCOc2ccccc2)c(=O)[nH]1
71722436	0	Cc1cccc(OCCCCCn2ccc(=O)[nH]c2=O)c1
71722438	0	Cc1cc(C)cc(OCCCCCn2ccc(=O)[nH]c2=O)c1
71722576	0	O=c1[nH]c(=O)n(CCCCCOc2ccc(Br)cc2)cc1I
71722573	0	O=c1ccn(CCCCCOc2ccc(Br)cc2)c(=O)[nH]1
71722440	0	CC(C)(C)c1ccc(OCCCCCn2ccc(=O)[nH]c2=O)cc1
71722575	0	O=c1[nH]c(=O)n(CCCCCOc2ccc(Br)cc2)cc1Br
71722723	0	O=c1ccn(CCCCCCCCOc2ccc(Br)cc2)c(=O)[nH]1
71722721	0	O=c1ccn(CCCCOc2ccc(Br)cc2)c(=O)[nH]1
136068698	0	O=c1[nH]cnc2c1ncn2CCOC(COCc1ccccc1)CP(=O)(O)O
56676853	0	O=c1ccn(CCOC(CO)CP(=O)(O)O)c(=O)[nH]1
56659702	0	CC(CP(=O)(O)O)OCCn1cnc2c(N)nc(N)nc21
56680174	0	Nc1ncnc2c1ncn2CCOC(COCc1ccccc1)CP(=O)(O)O
56673536	0	CC(CP(=O)(O)O)OCCn1ccc(N)nc1=O
56659703	0	Cc1cn(CCOC(CO)CP(=O)(O)O)c(=O)[nH]c1=O
56676852	0	Cc1cn(CCOC(C)CP(=O)(O)O)c(=O)[nH]c1=O
56673537	0	Nc1ncnc2c1ncn2CCOC(CO)CP(=O)(O)O
136026151	0	Nc1nc2c(ncn2CCOC(CO)CP(=O)(O)O)c(=O)[nH]1
136099207	0	Nc1nc2c(ncn2CCOC(COCc2ccccc2)CP(=O)(O)O)c(=O)[nH]1
136208038	0	O=c1[nH]cnc2c1ncn2CCOC(CO)CP(=O)(O)O
497008	0	CCOC(=O)c1nc2ccccc2n1S(=O)(=O)c1ccc([N+](=O)[O-])cc1
53232137	0	NC(=S)N/N=C/c1ccc(OC(F)(F)F)cc1
11543540	0	Nc1nc(=O)n(CCOCP(=O)(O)O)cc1F
53323191	0	CC(=O)OC[C@H]1O[C@@H](n2c(Br)nc3c(Cl)c(Cl)c(Cl)cc32)[C@H](OC(C)=O)[C@@H]1OC(C)=O
465094	0	OC[C@H]1O[C@@H](n2c(Br)nc3cc(Cl)c(Cl)cc32)[C@H](O)[C@@H]1O
53319245	0	CC(=O)OC[C@H]1O[C@@H](n2c(Cl)nc3c(Cl)c(Cl)c(Cl)cc32)[C@H](OC(C)=O)[C@@H]1OC(C)=O
54768282	0	CC(=O)Nc1ccn([C@H]2C[C@@H](O)CO2)c(=O)n1
6436743	0	CN(C)c1ccc(/C=N/NC(N)=S)cc1
53307132	0	Nc1ncnc2c1ncn2[C@H]1[C@H](O)[C@H](O)[C@@H](CO)C12CC2
46913823	0	Cc1cn([C@H]2C[C@@H](O)CO2)c(=O)[nH]c1=O
54768281	0	Nc1ncnc2c1ncn2[C@H]1C[C@@H](O)CO1
54768280	0	O=c1ccn([C@H]2C[C@@H](O)CO2)c(=O)[nH]1
54768283	0	Nc1ccn([C@H]2C[C@@H](O)CO2)c(=O)n1
56969518	0	CCOP(=O)(OCC)[C@@H]1C[C@@H](n2cc(-c3ccccn3)nn2)ON1C
56969732	0	CCOP(=O)(OCC)[C@@H]1C[C@H](n2cc(Cn3cnc4c(N)ncnc43)nn2)ON1C
56969516	0	CCOP(=O)(OCC)[C@@H]1C[C@@H](n2cc(-c3cccc(F)c3)nn2)ON1C
56969941	0	CCOP(=O)(OCC)[C@@H]1C[C@H](n2cc(-c3ccccn3)nn2)ON1C
56969736	0	CCOP(=O)(OCC)[C@@H]1C[C@H](n2cc(-c3cccc(F)c3)nn2)ON1C
56969293	0	CCOP(=O)(OCC)[C@@H]1C[C@@H](n2cc(Cn3ccc(NC(C)=O)nc3=O)nn2)ON1C
56969520	0	CCOP(=O)(OCC)[C@@H]1C[C@H](n2cc(Cn3ccc(=O)[nH]c3=O)nn2)ON1C
56969940	0	CCOP(=O)(OCC)[C@@H]1C[C@H](n2cc(-c3ccc(F)cc3F)nn2)ON1C
56969517	0	CCOP(=O)(OCC)[C@@H]1C[C@@H](n2cc(-c3ccc(F)cc3F)nn2)ON1C
56969292	0	CCOP(=O)(OCC)[C@@H]1C[C@@H](n2cc(Cn3cc(C)c(=O)[nH]c3=O)nn2)ON1C
56969294	0	CCOP(=O)(OCC)[C@@H]1C[C@@H](n2cc(Cn3cnc4c(N)ncnc43)nn2)ON1C
56969735	0	CCOP(=O)(OCC)[C@@H]1C[C@H](n2cc(-c3ccccc3F)nn2)ON1C
56969942	0	CCOP(=O)(OCC)[C@@H]1C[C@H](n2cc(-c3nccn3C)nn2)ON1C
56969072	0	CCOP(=O)(OCC)[C@@H]1C[C@@H](n2cc(Cn3ccc(=O)[nH]c3=O)nn2)ON1C
70690160	0	CCCCCCOc1nc(N)nc2c1ncn2/C=C1/CC1(CO)CO
56969296	0	CCOP(=O)(OCC)[C@@H]1C[C@@H](n2cc(-c3ccccc3)nn2)ON1C
56969297	0	CCOP(=O)(OCC)[C@@H]1C[C@@H](n2cc(-c3ccccc3F)nn2)ON1C
56969519	0	CCOP(=O)(OCC)[C@@H]1C[C@@H](n2cc(-c3nccn3C)nn2)ON1C
56969295	0	CCOP(=O)(OCC)[C@@H]1C[C@@H](n2cc(C(=O)OC)nn2)ON1C
56969734	0	CCOP(=O)(OCC)[C@@H]1C[C@H](n2cc(-c3ccccc3)nn2)ON1C
73124	0	Nc1ncnc2c1ncn2C[C@H](O)CO
56969731	0	CCOP(=O)(OCC)[C@@H]1C[C@H](n2cc(Cn3ccc(NC(C)=O)nc3=O)nn2)ON1C
65028	0	CCOC(=O)C1=C[C@@H](OC(CC)CC)[C@H](NC(C)=O)[C@@H](N)C1
56969733	0	CCOP(=O)(OCC)[C@@H]1C[C@H](n2cc(C(=O)OC)nn2)ON1C
56969521	0	CCOP(=O)(OCC)[C@@H]1C[C@H](n2cc(Cn3cc(C)c(=O)[nH]c3=O)nn2)ON1C
9611242	0	COc1cc(/C=N/NC(=O)COc2cccc3ccccc23)cc(OC)c1OC
9616655	0	O=C(COc1cccc2ccccc12)N/N=C/c1cccc(Cl)c1
76318431	0	O=C(OC1C=CC(n2ccc(=O)n(Cc3ccccc3)c2=O)C1)c1ccccc1
54342144	0	NC(=O)c1cnc([C@@H]2O[C@H](CO)[C@@H](O)[C@H]2O)s1
90673515	0	CS(=O)(=O)c1nc(N)c2nnn([C@H]3O[C@H](CO)[C@@H](O)[C@@H]3O)c2n1
90673514	0	CSc1nc(N)c2nnn([C@H]3O[C@H](CO)[C@@H](O)[C@@H]3O)c2n1
90673516	0	COc1nc(N)c2nnn([C@H]3O[C@H](CO)[C@@H](O)[C@@H]3O)c2n1
90673518	0	[N-]=[N+]=Nc1nc(N)c2nnn([C@H]3O[C@H](CO)[C@@H](O)[C@@H]3O)c2n1
90673513	0	CSc1nc(N)c2ncn([C@H]3O[C@H](CO)[C@@H](O)[C@@H]3O)c2n1
90673512	0	COc1nc(N)c2ncn([C@H]3O[C@H](CO)[C@@H](O)[C@@H]3O)c2n1
53672648	0	NNc1nc(N)c2ncn([C@H]3O[C@H](CO)[C@@H](O)[C@@H]3O)c2n1
90673517	0	NNc1nc(N)c2nnn([C@H]3O[C@H](CO)[C@@H](O)[C@@H]3O)c2n1
101875585	0	Nc1ncnc2c1ncn2[C@@H]1O[C@](F)(CO)[C@@H](F)[C@H]1O
118717403	0	Nc1ncnc2c1ncn2[C@@H]1O[C@](F)(CO)[C@H](F)[C@H]1O
118717404	0	Nc1ncnc2c1ncn2[C@@H]1O[C@@](F)(CO)[C@@H](F)[C@@H]1O
118717402	0	Nc1ncnc2c1ncn2[C@@H]1O[C@@](F)(CO)[C@H](F)[C@H]1O
444233	0	C[C@H]1O[C@@H](c2nc(C(N)=O)cs2)[C@H](O)[C@@H]1O
54517588	0	NC(=S)c1csc([C@@H]2O[C@H](CO)[C@@H](O)[C@H]2O)n1
10000206	0	CC(=O)OC[C@H]1O[C@@H](c2nc(C(N)=O)cs2)[C@H](OC(C)=O)[C@@H]1OC(C)=O
71736287	0	Clc1ccc2c(NCCCNc3ccnc(N4CCOCC4)n3)ccnc2c1
76310685	0	Clc1ccc2c(NCCCCCCCCCCNc3nccc(Cl)n3)ccnc2c1
76314306	0	Clc1ccc2c(NCCCOc3nccc(Cl)n3)ccnc2c1
71736284	0	Clc1ccc2c(NCCCNc3ccnc(Cl)n3)ccnc2c1
76336060	0	Clc1ccc2c(NCCCCNc3nccc(Cl)n3)ccnc2c1
76321598	0	Clc1ccc2c(NCCNc3ccnc(Cl)n3)ccnc2c1
71736286	0	Clc1ccc2c(NCCCNc3ccnc(N4CCCCC4)n3)ccnc2c1
76332442	0	Clc1ccc2c(NCCCCCCCCNc3ccnc(Cl)n3)ccnc2c1
76310684	0	Clc1ccc2c(NCCCCCCCCNc3nccc(Cl)n3)ccnc2c1
76325208	0	Clc1ccc2c(NCCCNc3nccc(N4CCNCC4)n3)ccnc2c1
335825	0	NC(=O)c1csc(-c2ccc(CO)o2)n1
76332441	0	Clc1ccc2c(NCCNc3nccc(Cl)n3)ccnc2c1
76336061	0	Clc1ccc2c(NCCCCCCCNc3nccc(Cl)n3)ccnc2c1
76321597	0	Clc1ccc2c(NCCCCCCCCCCCCNc3nccc(Cl)n3)ccnc2c1
824643	0	Clc1ccnc(N2CCOCC2)n1
76314307	0	Clc1ccc2c(NCCCNc3nccc(N4CCOCC4)n3)ccnc2c1
76310686	0	Clc1ccc2c(NCCCNc3nccc(N4CCCC4)n3)ccnc2c1
76328769	0	Clc1ccc2c(NCCCNc3nccc(N4CCCCC4)n3)ccnc2c1
71736285	0	Clc1ccc2c(NCCCNc3nccc(Cl)n3)ccnc2c1
168279388	0	Nc1nc(=O)n([C@@H]2CN[C@H](CO)[C@@H](O)C2)cc1F
137634213	0	CCOC(=O)[C@H](C)NP1(=O)OCC(OCn2cnc3c(=O)[nH]c(N)nc32)CO1
137642102	0	C[C@H](NP1(=O)OCC(OCn2cnc3c(Cl)nc(N)nc32)CO1)C(=O)OCc1ccccc1
138973459	0	O=c1ccn([C@@]23C[C@@H]2C[C@@H](CO)O3)c(=O)[nH]1
155531856	0	COP(=O)(N[C@@H](C)C(=O)OC(C)C)OC[C@@H]1C[C@H]2C[C@@]2(n2ccc(N)nc2=O)O1
155521727	0	Nc1ccn([C@@]23C[C@@H]2C[C@@H](CO)O3)c(=O)n1
155521551	0	COP(=O)(N[C@@H](C)C(=O)OC(C)C)OC[C@@H]1C[C@H]2C[C@@]2(n2ccc(=O)[nH]c2=O)O1
76322099	0	Cc1cc(C)cc(Cn2c(=O)ccn(C3C=CC(OC(=O)c4ccccc4)C3)c2=O)c1
76311212	0	Cc1ccc(Cn2c(=O)ccn(C3C=CC(OC(=O)c4ccccc4)C3)c2=O)cc1
198878	0	Cc1ccc(-[n+]2cc([O-])on2)cc1
135560497	0	C/C(=N\NC(=O)COc1cccc2ccccc12)c1ccc(O)cc1
9615931	0	O=C(COc1cccc2ccccc12)N/N=C/c1cccc([N+](=O)[O-])c1
9661449	0	C/C(=N\NC(=O)COc1cccc2ccccc12)c1cccc([N+](=O)[O-])c1
6870868	0	COc1ccc(/C=N/NC(=O)COc2cccc3ccccc23)cc1OC
9615930	0	O=C(COc1cccc2ccccc12)N/N=C/c1ccccc1[N+](=O)[O-]
19189957	0	COc1ccc(OC)c(/C=N/NC(=O)COc2cccc3ccccc23)c1
136135899	0	C/C(=N\NC(=O)COc1cccc2ccccc12)c1ccc(O)cc1O
9617324	0	O=C(COc1cccc2ccccc12)N/N=C/c1ccc(F)cc1
5530571	0	C/C(=N\NC(=O)COc1cccc2ccccc12)c1ccc([N+](=O)[O-])cc1
76315820	0	CCOc1ccc(/C=N/NC(=O)COc2cccc3ccccc23)cc1O
9629664	0	O=C(COc1cccc2ccccc12)N/N=C/c1ccccc1Br
9615919	0	O=C(COc1cccc2ccccc12)N/N=C/c1ccc([N+](=O)[O-])cc1
9661653	0	C/C(=N\NC(=O)COc1cccc2ccccc12)c1ccc(Cl)cc1
9610944	0	O=C(COc1cccc2ccccc12)N/N=C/c1ccc(Br)cc1
135613960	0	O=C(COc1cccc2ccccc12)N/N=C/c1ccccc1O
9556536	0	O=C(COc1cccc2ccccc12)N/N=C/c1ccccc1
6870631	0	COc1ccc(/C=N/NC(=O)COc2cccc3ccccc23)cc1
9656161	0	COc1ccc(/C=N/NC(=O)COc2cccc3ccccc23)cc1O
9640004	0	O=C(COc1cccc2ccccc12)N/N=C/C=C/c1ccccc1
9617301	0	O=C(COc1cccc2ccccc12)N/N=C/c1ccccc1Cl
135560476	0	O=C(COc1cccc2ccccc12)N/N=C/c1c(O)ccc2ccccc12
135411530	0	O=C(COc1cccc2ccccc12)N/N=C/c1c[nH]c2ccccc12
135603264	0	O=C(COc1cccc2ccccc12)N/N=C/c1ccc(O)cc1
76327135	0	Cc1ccc(-[n+]2noc([O-])c2CN2CCN(c3ccccc3)CC2)cc1
14063117	0	[O-]c1c[n+](-c2ccc(Cc3ccc(-[n+]4cc([O-])on4)cc3)cc2)no1
76309007	0	[O-]c1on[n+](-c2ccc(Cc3ccc(-[n+]4noc([O-])c4CN4CCN(c5cccc(Cl)c5Cl)CC4)cc3)cc2)c1CN1CCN(c2cccc(Cl)c2Cl)CC1
76312685	0	[O-]c1on[n+](-c2ccc(Cc3ccc(-[n+]4noc([O-])c4CN4CCN(C5=Nc6ccccc6Sc6ccccc65)CC4)cc3)cc2)c1CN1CCN(C2=Nc3ccccc3Sc3ccccc32)CC1
76319906	0	Cc1ccc(-[n+]2noc([O-])c2CN2CCN(c3cccc(Cl)c3Cl)CC2)cc1
76323562	0	Cc1ccc(-[n+]2noc([O-])c2CN2CCCCC2)cc1
76309009	0	Cc1ccc(-[n+]2noc([O-])c2CN2CCN(C)CC2)cc1
76323560	0	CN1CCN(Cc2c([O-])on[n+]2-c2ccc(Cc3ccc(-[n+]4noc([O-])c4CN4CCN(C)C(c5ccccc5)C4)cc3)cc2)CC1c1ccccc1
76319908	0	[O-]c1on[n+](-c2ccc(Cc3ccc(-[n+]4noc([O-])c4CN4CCN(c5ccccc5)CC4)cc3)cc2)c1CN1CCN(c2ccccc2)CC1
76334395	0	Cc1ccc(-[n+]2noc([O-])c2CN2CCN(C)C(c3ccccc3)C2)cc1
76309003	0	[O-]c1on[n+](-c2ccc(Cc3ccc(-[n+]4noc([O-])c4CN4CCCCC4)cc3)cc2)c1CN1CCCCC1
76330793	0	Cc1ccc(-[n+]2noc([O-])c2CN2CCNCC2)cc1
76334399	0	[O-]c1on[n+](-c2ccc(Cc3ccc(-[n+]4noc([O-])c4CN4CCNCC4)cc3)cc2)c1CN1CCNCC1
76309005	0	[O-]c1on[n+](-c2ccc(Cc3ccc(-[n+]4noc([O-])c4CN4CCN(c5cccc(Cl)c5)CC4)cc3)cc2)c1CN1CCN(c2cccc(Cl)c2)CC1
12710352	0	Cc1ccc(-[n+]2noc([O-])c2CN2CCOCC2)cc1
76334393	0	Cc1ccc(-[n+]2noc([O-])c2CN2CCN(C3=Nc4ccccc4Sc4ccccc43)CC2)cc1
76316210	0	CC(=O)N1CCN(Cc2c([O-])on[n+]2-c2ccc(Cc3ccc(-[n+]4noc([O-])c4CN4CCN(C(C)=O)CC4)cc3)cc2)CC1
76327133	0	CC(=O)N1CCN(Cc2c([O-])on[n+]2-c2ccc(C)cc2)CC1
76312683	0	Cc1ccc(-[n+]2noc([O-])c2CN2CCN(c3cccc(Cl)c3)CC2)cc1
9617322	0	O=C(COc1cccc2ccccc12)N/N=C/c1ccc(Cl)cc1
5335218	0	O=C(COc1cccc2ccccc12)N/N=C/c1cccc(Br)c1
9611260	0	CSc1ccc(/C=N/NC(=O)COc2cccc3ccccc23)cc1
9617313	0	Cc1ccc(/C=N/NC(=O)COc2cccc3ccccc23)cc1
135560498	0	C/C(=N\NC(=O)COc1cccc2ccccc12)c1ccccc1O
9619508	0	C/C(=N\NC(=O)COc1cccc2ccccc12)c1ccc(Br)cc1
46830304	0	O=C(NCc1ccc(Cl)cc1)c1cn2c(CCN(CCO)CCO)cc3cc(CN4CCOCC4)cc(c1=O)c32
46229324	0	CCc1nc(N)nc(=O)n1C[C@@H](CO)OCP(=O)(O)O
16110731	0	NC(N)=NC(=O)NC[C@@H](CO)OCP(=O)(O)O
16061444	0	CCCCCCCCCCCCCCCCOCCOP1(=O)CO[C@@H](Cn2cnc(N)nc2=O)CO1
44438037	0	Cc1cc(-c2ccccc2)c2ncc(CSCCc3ccccc3)n2c1
44438053	0	Cc1cc(-c2cccc(C#N)c2)cn2c(CSCCc3ccccc3)cnc12
44438047	0	COc1cccc(-c2cc(C)c3ncc(CSCCc4ccccc4)n3c2)c1
44438049	0	COc1ccc(-c2cc(C)c3ncc(CSCCc4ccccc4)n3c2)cc1
44438042	0	Cc1cc(-c2ccccc2O)cn2c(CSCCc3ccccc3)cnc12
44438055	0	Cc1cc(-c2cccc(F)c2)c2ncc(CSCCc3ccccc3)n2c1
44438043	0	Cc1cc(-c2cccc(O)c2)cn2c(CSCCc3ccccc3)cnc12
44438052	0	Cc1cc(-c2cccc([N+](=O)[O-])c2)c2ncc(CSCCc3ccccc3)n2c1
44438054	0	Cc1cc(-c2ccc(C#N)cc2)cn2c(CSCCc3ccccc3)cnc12
44438033	0	Cc1cc(I)c2ncc(CSCCc3ccccc3)n2c1
44438048	0	COc1cccc(-c2cc(C)cn3c(CSCCc4ccccc4)cnc23)c1
44438050	0	COc1ccc(-c2cc(C)cn3c(CSCCc4ccccc4)cnc23)cc1
23661573	0	Cc1cc(I)cn2c(CSCCc3ccccc3)cnc12
44438035	0	Cc1cc(Br)cn2c(CSCCc3ccccc3)cnc12
44438044	0	Cc1cc(-c2cccc(O)c2)c2ncc(CSCCc3ccccc3)n2c1
16754951	0	CC(C)(C)C(=O)OCOP1(=O)CO[C@@H](Cn2cnc(N)nc2=O)CO1
122873	0	Nc1ccn(C[C@H]2COP(=O)(O)CO2)c(=O)n1
135993365	0	Nc1nc2c([C@@H]3C=C(CO)[C@@H](O)[C@H]3O)c[nH]c2c(=O)[nH]1
16126689	0	Nc1ncnc2c([C@@H]3C=C(CO)[C@@H](O)[C@H]3O)c[nH]c12
44422395	0	Nc1ncc([C@@H]2C=C(CO)[C@@H](O)[C@H]2O)c(=O)[nH]1
44422400	0	O=c1[nH]cc([C@@H]2C=C(CO)[C@@H](O)[C@H]2O)c(=O)[nH]1
16754950	0	CCCCCCCCCCCCCCCCCCOP1(=O)CO[C@@H](Cn2cnc(N)nc2=O)CO1
44436718	0	CCCCCCCC/C=C/CCCCCCCCCCCCOP1(=O)CO[C@@H](Cn2cnc(N)nc2=O)CO1
16061427	0	Nc1ncn(C[C@H]2COP(=O)(O)CO2)c(=O)n1
16110080	0	Nc1ncn(C[C@@H](CO)OCP(=O)(O)O)c(=O)n1
44438051	0	Cc1cc(-c2cccc([N+](=O)[O-])c2)cn2c(CSCCc3ccccc3)cnc12
23661574	0	c1ccc(CCSCc2cnc3ccc(-c4ccccc4)cn23)cc1
44438038	0	Cc1cc(-c2ccsc2)cn2c(CSCCc3ccccc3)cnc12
44438045	0	Cc1cc(-c2ccc(O)cc2)cn2c(CSCCc3ccccc3)cnc12
44438036	0	Cc1cc(-c2ccccc2)cn2c(CSCCc3ccccc3)cnc12
44438046	0	Cc1cc(-c2ccc(O)cc2)c2ncc(CSCCc3ccccc3)n2c1
24814790	0	S=C(Nc1ccccc1)Nc1ccc(OCc2n[nH]c(=S)n2-c2ccccc2)cc1
24814650	0	CCn1c(COc2ccc(NC(=S)Nc3ccccc3)cc2)n[nH]c1=S
24814793	0	Nc1ccc(OCc2n[nH]c(=S)n2-c2ccccc2)cc1
44438039	0	Cc1cc(-c2ccsc2)c2ncc(CSCCc3ccccc3)n2c1
44438040	0	Cc1cc(-c2cccs2)cn2c(CSCCc3ccccc3)cnc12
44438041	0	Cc1cc(-c2cccs2)c2ncc(CSCCc3ccccc3)n2c1
16110734	0	Nc1ncn(CCOCP(=O)(O)O)c(=O)n1
24814937	0	C=CCNC(=S)Nc1ccc(OCc2n[nH]c(=S)n2-c2ccccc2)cc1
44387978	0	O=C(C(Cc1ccccc1)NC(=O)n1nnc2ccccc21)N1CCCC1
44388008	0	O=C(NC1CCCC1)C(Cc1ccccc1)NC(=O)n1nnc2ccccc21
9860116	0	O=C1NC(c2ccccc2)C(=O)N1Cc1ccccc1
44387982	0	CCC(C)C(NC(=O)n1nnc2ccccc21)C(=O)NCc1ccccc1
5273849	0	CC(C)C1NC(=O)N(C2CCCCC2)C1=O
14842479	0	O=C(NCc1ccccc1)C(Cc1ccccc1)NC(=O)n1nnc2ccccc21
5273850	0	CCC(C)C1NC(=O)N(C2CCCC2)C1=O
5273854	0	O=C1NC(c2ccccc2)C(=O)N1C1CCCC1
44387964	0	O=C(NC(c1ccccc1)c1ccccc1)C(NC(=O)n1nnc2ccccc21)c1ccccc1
44388091	0	CCC(C)C1NC(=O)N(Cc2ccccc2)C1=O
44387998	0	CCC(C)C(NC(=O)n1nnc2ccccc21)C(=O)NC(c1ccccc1)c1ccccc1
44387960	0	O=C(C(NC(=O)n1nnc2ccccc21)c1ccccc1)N1CCCCC1
42636965	0	C#CC1(O)C=CN([C@@H]2O[C@H](CO)[C@@H](O)[C@H]2O)C(=O)C1(F)F
42638109	0	NC(=O)Cc1ccn([C@@H]2O[C@H](CO)[C@@H](O)[C@H]2O)c(=O)c1F
5273848	0	CC(C)C1NC(=O)N(C2CCCC2)C1=O
44387976	0	CCC(C)C(NC(=O)n1nnc2ccccc21)C(=O)NC1CCCCC1
44387962	0	CC(C)C(NC(=O)n1nnc2ccccc21)C(=O)NC1CCCCC1
44387989	0	O=C(NC(c1ccccc1)c1ccccc1)C(Cc1ccccc1)NC(=O)n1nnc2ccccc21
44387959	0	O=C(NC1CCCCC1)C(Cc1ccccc1)NC(=O)n1nnc2ccccc21
14842475	0	O=C(NC1CCCCC1)C(NC(=O)n1nnc2ccccc21)c1ccccc1
21158011	0	CC(C)C(NC(=O)n1nnc2ccccc21)C(=O)NC1CCCC1
44388017	0	O=C(NCC1CCCCC1)C(NC(=O)n1nnc2ccccc21)c1ccccc1
44387968	0	CCC(C)C(NC(=O)n1nnc2ccccc21)C(=O)NC1CCCC1
5273851	0	CCC(C)C1NC(=O)N(C2CCCCC2)C1=O
16110732	0	C[C@H](Cn1cnc(N)nc1=O)OCP(=O)(O)O
44420631	0	NC1=NCN(C[C@@H](CO)CCP(=O)(O)O)C(=O)N1
137629162	0	N=C(NC=O)NC(=O)NC[C@@H](CO)OCP(=O)(O)O
16110729	0	Nc1ncn(C[C@H](O)CO)c(=O)n1
11580118	0	N#C/C=C/[C@H]1O[C@@H](n2cnc3c(N)ncnc32)[C@H](O)[C@@H]1O
16110740	0	Nc1ncn(C[C@H](CO)OCP(=O)(O)O)c(=O)n1
15151762	0	Nc1cnn(C[C@@H](CO)OCP(=O)(O)O)c(=O)n1
11536570	0	N#C/C=C\[C@H]1O[C@@H](n2cnc3c(N)ncnc32)[C@H](O)[C@@H]1O
11537088	0	N#C/C(Cl)=C\[C@H]1O[C@@H](n2cnc3c(N)ncnc32)[C@H](O)[C@@H]1O
24814932	0	CCn1c(COc2ccc(NC(=S)NC)cc2)n[nH]c1=S
24814647	0	CNC(=S)Nc1ccc(OCc2n[nH]c(=S)n2C)cc1
46229327	0	Nc1nc(-c2ccccc2)n(C[C@@H](CO)OCP(=O)(O)O)c(=O)n1
25110667	0	Cc1cc(Sc2ccc(O)cc2)c2ncc(CSCCc3ccccc3)n2c1
15986985	0	CCCCCCCCCCCCCCCCOCCCOP(=O)(O)CC/C=C\Cn1ccc(=O)[nH]c1=O
44225225	0	CCNC(=S)Nc1ccc(NS(C)(=O)=O)c(Oc2ccccc2)c1
44225221	0	CCCNC(=S)Nc1ccc(NS(C)(=O)=O)c(Oc2ccccc2)c1
44588593	0	Cc1cc(N2CCOCC2)c2ncc(CSCCc3ccccc3)n2c1
44588705	0	Cc1cc(-n2ccnc2)c2ncc(CSCCc3ccccc3)n2c1
44588982	0	Cc1cc(-c2ccsc2)cn2c(CSCc3ccccc3)cnc12
25110652	0	Cc1cc(-n2cccc2)cn2c(CSCc3ccccc3)cnc12
44588595	0	Cc1cc(N2CCCC2)c2ncc(CSCc3ccccc3)n2c1
44588708	0	Cc1cc(C#N)c2ncc(CSCCc3ccccc3)n2c1
44588985	0	Cc1cc(N2CCOCC2)cn2c(CSCCc3ccccc3)cnc12
44589008	0	Cc1cc(N2CCCC2=O)cn2c(CSCCc3ccccc3)cnc12
25110665	0	Cc1cc(Sc2ccc(N)cc2)cn2c(CSCCc3ccccc3)cnc12
44588727	0	Cc1cc(Sc2ccc(Cl)cc2)c2ncc(CSCCc3ccccc3)n2c1
44589032	0	Cc1cc(-n2ccc3ccccc32)cn2c(CSCCc3ccccc3)cnc12
44589033	0	Cc1cc(-n2ccc3cccnc32)cn2c(CSCCc3ccccc3)cnc12
44588594	0	Cc1cc(N2CCCC2)c2ncc(CSCCc3ccccc3)n2c1
44588596	0	Cc1cc(N2CCN(C)CC2)c2ncc(CSCCc3ccccc3)n2c1
44589009	0	Cc1cc(-n2cccc2)cn2c(CSCCc3ccccc3)cnc12
44588616	0	Cc1cc(-n2cccc2)c2ncc(CSCCc3ccccc3)n2c1
44589034	0	Cc1cc(C#N)cn2c(CSCCc3ccccc3)cnc12
44225222	0	CS(=O)(=O)Nc1ccc(NC(=S)NCCc2ccccc2)cc1Oc1ccccc1
11964538	0	O=c1c2ncn(CC3(CO)CC3CO)c2nc2[nH]c(-c3ccccc3)cn12
44140466	0	O=c1c2ncn(COCCO)c2nc2[nH]c(-c3ccco3)cn12
46229326	0	CCCCc1nc(N)nc(=O)n1C[C@@H](CO)OCP(=O)(O)O
46229325	0	CCCc1nc(N)nc(=O)n1C[C@@H](CO)OCP(=O)(O)O
46229715	0	Cc1nc(N)nc(=O)n1C[C@@H](CO)OCP(=O)(O)O
45269825	0	Cc1ccc(S(=O)(=O)N(CCOCP(=O)(O)O)Cn2cc(F)c(=O)[nH]c2=O)cc1
44225466	0	C=CCNC(=S)Nc1ccc(NS(C)(=O)=O)c(Oc2ccccc2)c1
44225467	0	CS(=O)(=O)Nc1ccc(NC(=S)NCc2ccccc2)cc1Oc1ccccc1
44225469	0	CS(=O)(=O)Nc1ccc(NC(=S)Nc2ccc([N+](=O)[O-])cc2)cc1Oc1ccccc1
44225223	0	CS(=O)(=O)Nc1ccc(NC(=S)NC2CCCCC2)cc1Oc1ccccc1
45273249	0	Cc1ccc(S(=O)(=O)N(CCOCP(=O)(O)O)Cn2ccc(=O)[nH]c2=O)cc1
45268966	0	Cc1ccc(S(=O)(=O)N(CCOCP(=O)(O)O)Cn2ccc(N)nc2=O)cc1
44187553	0	Cc1ccc(S(=O)(=O)N(CCOCP(=O)(O)O)Cn2cc(C)c(=O)[nH]c2=O)cc1
44589082	0	Cc1cc(-c2ccco2)c2ncc(CSCCc3ccccc3)n2c1
44589007	0	Cc1cc(N2CCN(C)CC2)cn2c(CSCCc3ccccc3)cnc12
24814933	0	C=CCNC(=S)Nc1ccc(OCc2n[nH]c(=S)n2CC)cc1
24814508	0	Cn1c(COc2ccc(N)cc2)n[nH]c1=S
24814794	0	CCNC(=S)Nc1ccc(OCc2n[nH]c(=S)n2C)cc1
24814934	0	C=CCn1c(COc2ccc(NC(=S)NC)cc2)n[nH]c1=S
24814935	0	C=CCNC(=S)Nc1ccc(OCc2n[nH]c(=S)n2CC=C)cc1
24814648	0	C=CCNC(=S)Nc1ccc(OCc2n[nH]c(=S)n2C)cc1
24814649	0	CCNC(=S)Nc1ccc(OCc2n[nH]c(=S)n2CC)cc1
24814651	0	C=CCn1c(COc2ccc(NC(=S)NCC)cc2)n[nH]c1=S
24814792	0	CCn1c(COc2ccc(N)cc2)n[nH]c1=S
24814652	0	C=CCn1c(COc2ccc(NC(=S)Nc3ccccc3)cc2)n[nH]c1=S
44588983	0	Cc1cc(-c2ccco2)cn2c(CSCCc3ccccc3)cnc12
24814646	0	C=CCn1c(COc2ccc(N)cc2)n[nH]c1=S
24814789	0	CCNC(=S)Nc1ccc(OCc2n[nH]c(=S)n2-c2ccccc2)cc1
24814936	0	CNC(=S)Nc1ccc(OCc2n[nH]c(=S)n2-c2ccccc2)cc1
24814795	0	Cn1c(COc2ccc(NC(=S)Nc3ccccc3)cc2)n[nH]c1=S
44589006	0	Cc1cc(N2CCCC2)cn2c(CSCCc3ccccc3)cnc12
44589081	0	Cc1cc(-c2ccsc2)c2ncc(CSCc3ccccc3)n2c1
44589083	0	Cc1cc(-c2ccoc2)c2ncc(CSCCc3ccccc3)n2c1
25110666	0	Cc1cc(-n2cccc2)c2ncc(CSCc3ccccc3)n2c1
44588706	0	Cc1cc(-n2ccc3ccccc32)c2ncc(CSCCc3ccccc3)n2c1
44588597	0	Cc1cc(N2CCCC2=O)c2ncc(CSCCc3ccccc3)n2c1
44589031	0	Cc1cc(-n2ccnc2)cn2c(CSCCc3ccccc3)cnc12
44588707	0	Cc1cc(-n2ccc3cccnc32)c2ncc(CSCCc3ccccc3)n2c1
44589035	0	Cc1cc(Sc2ccc(Cl)cc2)cn2c(CSCCc3ccccc3)cnc12
44588984	0	Cc1cc(-c2ccoc2)cn2c(CSCCc3ccccc3)cnc12
44589080	0	Cc1cc(Sc2ccc(O)cc2)cn2c(CSCCc3ccccc3)cnc12
497003	0	O=[N+]([O-])c1ccc(S(=O)(=O)n2c(CCc3ccccn3)nc3ccccc32)c([N+](=O)[O-])c1
162653200	0	O=c1ccn([C@@H]2O[C@](F)(CO)[C@@H](O)C2(F)F)c(=O)[nH]1
496999	0	O=[N+]([O-])c1ccc(S(=O)(=O)n2c(CCc3ccccn3)nc3ccccc32)cc1
492108	0	C#CCCCCc1cc2cn([C@H]3C[C@H](O)[C@@H](CO)O3)c(=O)nc2o1
135480764	0	Nc1nc2c(ncn2OC(CO)CCO)c(=O)[nH]1
168273075	0	C#CC(CO)(Cn1cc(C)c(=O)[nH]c1=O)OCP(=O)(O)O.CCN(CC)CC
168270789	0	C#CC(CO)(Cn1cnc2c(N)ncnc21)OCP(=O)(O)O.CCN(CC)CC
168278544	0	CC(CO)(Cn1cnc2c(N)ncnc21)OCP(=O)(O)O.CCN(CC)CC
162677160	0	CC(=O)OC[C@H]1O[C@@H](n2cc3c(C#CCCN4C(=O)c5ccccc5C4=O)c(-c4ccc(C)cc4)oc3nc2=O)C[C@@H]1OC(C)=O
488237	0	N#CNC(CCl)c1cn([C@H]2C[C@H](O)[C@@H](CO)O2)c(=O)[nH]c1=O
10422963	0	Nc1nc(F)c2ncn(/C=C3/CC3(CO)CO)c2n1
46876110	0	N#CNC(CBr)c1cn(C2O[C@H](CO)[C@@H](O)[C@@H]2O)c(=O)[nH]c1=O
44590828	0	CCC1(Cc2ccccc2)OS(=O)(=O)C=C1NCc1ccccc1
134382702	0	CCCCCOC(=O)C[C@H](NP(=O)(CO[C@@H](CF)Cn1ccc(N)nc1=O)Oc1ccccc1)C(=O)OCCCCC
480976	0	O=C1c2ccccc2N(Cc2cccc(Cl)c2)S(=O)(=O)N1Cc1ccccc1
6474952	0	O=c1[nH]c(=O)n([C@H]2CO[C@H](CO)O2)cc1/C=C/Br
137656604	0	C[C@H](NP(=O)(OCC(CCn1cnc2c(=O)[nH]c(/N=C/N(C)C)nc21)COP(=O)(N[C@@H](C)C(=O)OCc1ccccc1)Oc1ccccc1)Oc1ccccc1)C(=O)OCc1ccccc1
16756193	0	CCCc1ccc(C#Cc2cc3cn([C@H]4C[C@H](O)[C@@H](CO)O4)c(=O)nc3o2)cc1
137657318	0	CCOP(=O)(OCC)C1CC(Cn2c(=O)n(Cc3cccc(F)c3)c(=O)c3ccccc32)ON1C
90683381	0	Cc1ccc(-c2cn(C/C=C3\OC(=O)C(OCc4ccccc4)=C3OCc3ccccc3)nn2)cc1
122180134	0	CCCN1C(=O)c2cccc3cc(NC(=O)[C@@H]4C[C@@H](P(=O)(OCC)OCC)N(C)O4)cc(c23)C1=O
122180136	0	CCCCN1C(=O)c2cccc3cc(NC(=O)[C@@H]4C[C@@H](P(=O)(OCC)OCC)N(C)O4)cc(c23)C1=O
137650796	0	C[C@H](NP(=O)(OCC(CO)OCn1cnc2c(=O)[nH]c(N)nc21)Oc1cccc2ccccc12)C(=O)OCc1ccccc1
6479196	0	O=c1[nH]c(=O)n([C@H]2CO[C@H](CO)O2)cc1/C=C/Cl
56663186	0	COC(=O)[C@H](C)NP(=O)(OC[C@H]1O[C@@H](n2cc(I)c(=O)[nH]c2=O)C(F)(F)[C@@H]1O)Oc1cccc2ccccc12
76685072	0	CCOC(=O)[C@H](Cc1ccccc1)NP(=O)(COCCn1cnc(N)nc1=O)N[C@@H](Cc1ccccc1)C(=O)OCC
56665192	0	Nc1ncnc2c1ncn2CCOCP(=O)(OCCOCCCCCCCCCCO)OCCOCCCCCCCCCCO
145985310	0	CC(C)OC(=O)[C@H](C)NP(=O)(CO[C@H]1C[C@@H](n2cnc3c(=O)[nH]c(N)nc32)C[C@@H]1O)N[C@@H](C)C(=O)OC(C)C
145955644	0	C/C(=C\CP(=O)(N[C@@H](C)C(=O)OC(C)C)Oc1cccc2c1CCCC2)Cn1ccc(=O)[nH]c1=O
503310	0	O=c1[nH]c(=O)n([C@@H]2CO[C@H](CO)O2)cc1Br
6479198	0	O=c1[nH]c(=O)n([C@H]2CO[C@H](CO)O2)cc1/C=C/I
6474954	0	O=c1[nH]c(=O)n([C@@H]2CO[C@@H](CO)O2)cc1/C=C/Br
66377	0	CCc1cn([C@H]2C[C@H](O)[C@@H](CO)O2)c(=O)[nH]c1=O
5271148	0	O=c1[nH]c(=O)n([C@H]2C[C@H](O)[C@@H](CO)O2)cc1C#CCCCCCCCCCF
137657936	0	C[C@H](NP(=O)(OCC(CO)CCn1cnc2c(=O)[nH]c(N)nc21)Oc1cccc2ccccc12)C(=O)OCc1ccccc1
44582846	0	CC/C=C/c1ccccc1-c1cc2cn([C@H]3C[C@H](O)[C@@H](CO)O3)c(=O)nc2o1
513044	0	C#CCCCCCc1cc2cn([C@H]3C[C@H](O)[C@@H](CO)O3)c(=O)nc2o1
56683536	0	C[C@H](NP(=O)(OC[C@H]1O[C@@H](n2cc(I)c(=O)[nH]c2=O)C(F)(F)[C@@H]1O)Oc1cccc2ccccc12)C(=O)OCc1ccccc1
472185	0	Nc1nc(=O)n(CCOCP(=O)(O)O)cc1Br
122180133	0	CCCN1C(=O)c2cccc3cc(NC(=O)[C@H]4C[C@@H](P(=O)(OCC)OCC)N(C)O4)cc(c23)C1=O
122180135	0	CCCCN1C(=O)c2cccc3cc(NC(=O)[C@H]4C[C@@H](P(=O)(OCC)OCC)N(C)O4)cc(c23)C1=O
60167461	0	COc1cc(C#CC#Cc2cn([C@H]3C[C@H](O)[C@@H](CO)O3)c(=O)[nH]c2=O)cc(OC)c1
134382929	0	CCCCCOC(=O)C[C@H](NP(=O)(CO[C@H](CF)COc1nccc(N)n1)Oc1ccccc1)C(=O)OCCCCC
156010138	0	CCCCCOC(=O)[C@@H](NP(=O)(CO[C@H](CF)COc1nccc(N)n1)Oc1ccccc1)C(C)C
11617745	0	CCCCCCC#Cc1cc2cn([C@@H]3O[C@H](CO)[C@@H](O)[C@H]3O)c(=O)nc2o1
145962973	0	C/C(=C/CP(=O)(N[C@@H](C)C(=O)OC(C)C)Oc1cccc2ccccc12)Cn1cc(C)c(=O)[nH]c1=O
122180141	0	CCOP(=O)(OCC)[C@@H]1C[C@H](C(=O)Nc2cc3c4c(cccc4c2)C(=O)N(CCN(CC)CC)C3=O)ON1C
145961673	0	C/C(=C\CP(=O)(N[C@@H](C)C(=O)OCc1ccccc1)Oc1cccc2ccccc12)Cn1cc(C)c(=O)[nH]c1=O
16072392	0	Nc1ncnc2c1ncn2/C=C1/[C@@H](F)[C@@H]1CO
60167464	0	O=c1[nH]c(=O)n([C@H]2C[C@H](O)[C@@H](CO)O2)cc1C#CC#CCC1CCCC1
11523679	0	CCCCCCC#Cc1cc2cn([C@@H]3O[C@H](CO)[C@@H](O)[C@@H]3O)c(=O)nc2o1
56661755	0	Nc1ncnc2c1ncn2CCOCP(=O)(OCCCCCCCCCCO)OCCCCCCCCCCO
137654240	0	CCOP(=O)(OCC)[C@@H]1C[C@@H](Cn2c(=O)n(C(=O)c3ccccc3F)c(=O)c3ccccc32)ON1C
51040857	0	CC(C)(C)c1ccc(-n2cc(-c3cn([C@H]4C[C@H](O)[C@@H](CO)O4)c(=O)[nH]c3=O)nn2)cc1
156014826	0	CCCCCOC(=O)[C@@H](NP1(=O)CO[C@H](COc2nccc(N)n2)CO1)C(C)C
16756972	0	Cc1ccc(C#Cc2cc3cn([C@H]4C[C@H](O)[C@@H](CO)O4)c(=O)nc3o2)cc1
145961742	0	C/C(=C/CP(=O)(N[C@@H](C)C(=O)OC(C)C)Oc1cccc2c1CCCC2)Cn1cc(C)c(=O)[nH]c1=O
155531575	0	O=c1c2ncn(CCC(CO)CO)c2nc2[nH]c(-c3ccc4c(c3)OCO4)cn12
155550943	0	C[Si](C)(C)c1cn(C[C@H](O)[C@H]2OC(=O)C(OCc3ccccc3)=C2OCc2ccccc2)nn1
155546731	0	CC(C)(C)c1cn(C[C@H](O)[C@H]2OC(=O)C(OCc3ccccc3)=C2OCc2ccccc2)nn1
155525646	0	COc1ccccc1-c1cn(C/C=C2\OC(=O)C(OCc3ccccc3)=C2OCc2ccccc2)nn1
162669630	0	COCC#Cc1c(-c2ccc(C)cc2)oc2nc(=O)n([C@H]3C[C@H](OC(C)=O)[C@@H](COC(C)=O)O3)cc12
164623455	0	COc1ccc(C(OCCOCn2cc3c(nc2=O)N(C)c2ccccc2O3)(c2ccccc2)c2ccc(OC)cc2)cc1
164628704	0	CCCCCCCCCOc1ccc2c(c1)N(C)c1nc(=O)n([C@H]3C[C@H](O)[C@@H](CO)O3)cc1O2
164621364	0	COc1ccc(C(OCCOCN2C=C(Br)C(O)NC2=O)(c2ccccc2)c2ccc(OC)cc2)cc1
145966223	0	CCCCCCCCCCCCCCCOCCCOP(=O)(O)C/C=C/Cn1cc(C)c(=O)[nH]c1=O
168282507	0	C#CC(CO)(Cn1ccc(=O)[nH]c1=O)OCP(=O)(O)O.CCN(CC)CC
137644194	0	CC(C)(NP(=O)(OCC(CCn1cnc2c(=O)[nH]c(N)nc21)COP(=O)(NC(C)(C)C(=O)OCc1ccccc1)Oc1ccccc1)Oc1ccccc1)C(=O)OCc1ccccc1
488238	0	N#CNC(CBr)c1cn([C@H]2C[C@H](O)[C@@H](CO)O2)c(=O)[nH]c1=O
145953988	0	C/C(=C\CP(=O)(N[C@@H](C)C(=O)OC(C)C)Oc1cccc2ccccc12)Cn1ccc(=O)[nH]c1=O
137648791	0	C[C@H](NP(=O)(OCC(COP(=O)(N[C@@H](C)C(=O)OCc1ccccc1)Oc1cccc2ccccc12)SCn1cnc2c(=O)[nH]c(/N=C/N(C)C)nc21)Oc1cccc2ccccc12)C(=O)OCc1ccccc1
137662067	0	CCOP(=O)(OCC)[C@@H]1C[C@@H](Cn2c(=O)n(Cc3ccccc3)c(=O)c3ccccc32)ON1C
122180144	0	CCOP(=O)(OCC)[C@@H]1C[C@@H](C(=O)Nc2cc3c4c(cccc4c2)C(=O)N(CCN2CCCC2)C3=O)ON1C
122180142	0	CCOP(=O)(OCC)[C@@H]1C[C@@H](C(=O)Nc2cc3c4c(cccc4c2)C(=O)N(CCN(CC)CC)C3=O)ON1C
122180143	0	CCOP(=O)(OCC)[C@@H]1C[C@H](C(=O)Nc2cc3c4c(cccc4c2)C(=O)N(CCN2CCCC2)C3=O)ON1C
122192831	0	O=C(Cn1c(=O)ccn(CCCCCOc2ccc(-c3ccccc3)cc2)c1=O)Nc1ccc(Oc2ccccc2)cc1
145956822	0	CC(=O)C1=C(C)N(Cc2cn(Cc3ccc([N+](=O)[O-])cc3)nn2)C(=O)N(Cc2cn(Cc3ccc([N+](=O)[O-])cc3)nn2)C1c1ccc(OCc2cn(Cc3ccc([N+](=O)[O-])cc3)nn2)cc1
145972280	0	C[C@H](NP(=O)(C/C=C/Cn1cc(Cl)c(=O)[nH]c1=O)Oc1ccccc1)C(=O)OCc1ccccc1
137652428	0	CCOP(=O)(OCC)C1CC(Cn2c(=O)n(C(=O)c3ccccc3F)c(=O)c3ccccc32)ON1Cc1ccccc1
137637937	0	COc1nc(N)nc2c1ncn2CCC(COP(=O)(N[C@@H](C)C(=O)OCc1ccccc1)Oc1ccccc1)COP(=O)(N[C@@H](C)C(=O)OCc1ccccc1)Oc1ccccc1
137645402	0	CCOP(=O)(OCC)[C@@H]1C[C@@H](Cn2c(=O)n(Cc3ccc(F)cc3)c(=O)c3ccccc32)ON1C
137633957	0	CCOP(=O)(OCC)[C@@H]1C[C@@H](Cn2c(=O)n(Cc3ccccc3F)c(=O)c3ccccc32)ON1C
137647904	0	CCOP(=O)(OCC)C1CC(Cn2c(=O)n(Cc3ccccc3)c(=O)c3ccccc32)ON1Cc1ccccc1
137659862	0	CCOP(=O)(OCC)[C@@H]1C[C@@H](Cn2c(=O)n(C(=O)c3ccccc3)c(=O)c3ccccc32)ON1Cc1ccccc1
137635923	0	CCOP(=O)(OCC)[C@@H]1C[C@@H](Cn2c(=O)n(Cc3ccccc3F)c(=O)c3ccccc32)ON1Cc1ccccc1
137646138	0	CCOP(=O)(OCC)C1CC(Cn2c(=O)n(Cc3cccc(F)c3)c(=O)c3ccccc32)ON1Cc1ccccc1
137655062	0	COc1ccc(-c2nc(SC)nc(NCCCCNc3ccnc4cc(Cl)ccc34)c2C#N)cc1OC
137639302	0	C[C@H](NP(=O)(OCC(COP(=O)(N[C@@H](C)C(=O)OCc1ccccc1)Oc1ccccc1)OCn1cnc2c(=O)[nH]c(N)nc21)Oc1ccccc1)C(=O)OCc1ccccc1
137643323	0	CCOP(=O)(OCC)C1CC(Cn2c(=O)n(C(=O)c3ccccc3F)c(=O)c3ccccc32)ON1C
137642169	0	CCOP(=O)(OCC)[C@H]1C[C@@H](Cn2c(=O)n(C(=O)c3ccc(F)cc3)c(=O)c3ccccc32)ON1C
44273066	0	O=c1[nH]c(=O)n([C@@H]2C(F)[C@H](CO)C2CO)cc1/C=C/I
137657352	0	COC(=O)[C@H](C)NP(=O)(OCC(CO)CCn1cnc2c(OC)nc(N)nc21)Oc1cccc2ccccc12
137649786	0	CCOP(=O)(OCC)C1CC(Cn2c(=O)n(Cc3ccc(F)cc3)c(=O)c3ccccc32)ON1C
44319218	0	O=c1[nH]c(=O)n(C2CO[C@@H](CO)O2)cc1/C=C/Br
44339838	0	O=C(OCOCN1c2ccccc2C(=O)N(Cc2ccccc2)S1(=O)=O)c1ccccc1
122180140	0	CCOP(=O)(OCC)[C@@H]1C[C@@H](C(=O)Nc2cc3c4c(cccc4c2)C(=O)N(CCN(C)C)C3=O)ON1C
5272217	0	O=C(Nc1ccc(NC(=S)NCc2ccccc2)cc1)c1ccccc1F
9613008	0	CN(C)c1ccc(/C=N/Nc2nc(-c3ccc(F)cc3)cs2)cc1
135508841	0	COC(=O)[C@H](C)NP(=O)(OCCOCn1cnc2c(=O)[nH]c(N)nc21)Oc1ccccc1
137658997	0	CCOP(=O)(OCC)C1CC(Cn2c(=O)n(C(=O)c3cccc(F)c3)c(=O)c3ccccc32)ON1C
56676851	0	CCC(CP(=O)(O)O)OCCn1cnc2c(N)ncnc21
137658177	0	COc1nc(N)nc2c1ncn2CCC(CO)COP(=O)(N[C@@H](C)C(=O)OCc1ccccc1)Oc1ccccc1
11601323	0	CCCCCCC#Cc1cc2cn(C)c(=O)nc2o1
15340361	0	O=c1[nH]c(=O)n([C@@H]2O[C@H](CO)[C@@H](O)C2(F)F)cc1Br
137644343	0	COc1nc(N)nc2c1ncn2CCC(CO)COP(=O)(N[C@@H](C)C(=O)OCc1ccccc1)Oc1cccc2ccccc12
134382698	0	CCCCCOC(=O)C[C@H](NP(=O)(CO[C@H](CF)Cn1cc(C)c(=O)[nH]c1=O)Oc1ccccc1)C(=O)OCCCCC
137634393	0	CC(C)OC(=O)OCOP(=O)(COCCn1cnc(N)nc1=O)OCOC(=O)OC(C)C
44379288	0	O=c1[nH]c(=O)n([C@H]2CC(O)C(CO)S2)cc1CC(F)(F)F
44378972	0	COC(C)c1cn(C2CC(O)C(CO)S2)c(=O)[nH]c1=O
44378806	0	O=c1[nH]c(=O)n([C@H]2CC(O)C(CO)S2)cc1Br
480978	0	O=C1c2ccccc2N(Cc2ccccc2)S(=O)(=O)N1Cc1ccccc1Cl
480972	0	O=S1(=O)N=C(OCc2ccccc2)c2ccccc2N1Cc1ccccc1
480983	0	O=S1(=O)N=C(OCc2ccccc2)c2ccccc2N1Cc1ccc(Cl)c(Cl)c1
6474729	0	O=c1[nH]c(=O)n([C@H]2O[C@@H](CO)[C@H](O)[C@@H]2F)cc1/C=C/Br
6474728	0	O=c1[nH]c(=O)n([C@H]2O[C@@H](CO)[C@H](O)[C@H]2F)cc1/C=C/Br
53358789	0	O=c1[nH]c(=O)n([C@@H]2O[C@H](CO)[C@@H](O)C2(F)F)cc1I
51041060	0	O=c1[nH]c(=O)n([C@H]2C[C@H](O)[C@@H](CO)O2)cc1-c1cn(-c2ccc(OC(F)(F)F)cc2)nn1
51041061	0	O=c1[nH]c(=O)n([C@H]2C[C@H](O)[C@@H](CO)O2)cc1-c1cn(-c2ccc([N+](=O)[O-])cc2)nn1
51040643	0	O=c1[nH]c(=O)n([C@H]2C[C@H](O)[C@@H](CO)O2)cc1-c1cn(-c2cc(F)cc(F)c2)nn1
51040858	0	CCCCc1ccc(-n2cc(-c3cn([C@H]4C[C@H](O)[C@@H](CO)O4)c(=O)[nH]c3=O)nn2)cc1
15340362	0	O=c1[nH]c(=O)n([C@@H]2O[C@H](CO)[C@@H](O)C2(F)F)cc1Cl
56670045	0	COC(=O)[C@H](C)NP(=O)(OC[C@H]1O[C@@H](n2cc(I)c(=O)[nH]c2=O)C(F)(F)[C@@H]1O)Oc1ccccc1
56673561	0	C[C@H](NP(=O)(OC[C@H]1O[C@@H](n2cc(Cl)c(=O)[nH]c2=O)C(F)(F)[C@@H]1O)Oc1ccccc1)C(=O)OCc1ccccc1
56680197	0	C[C@H](NP(=O)(OC[C@H]1O[C@@H](n2cc(Br)c(=O)[nH]c2=O)C(F)(F)[C@@H]1O)Oc1ccccc1)C(=O)OCc1ccccc1
51040861	0	CSc1ccc(-n2cc(-c3cn([C@H]4C[C@H](O)[C@@H](CO)O4)c(=O)[nH]c3=O)nn2)cc1
16756295	0	CCCc1ccc(CCc2cc3cn([C@H]4C[C@H](O)[C@@H](CO)O4)c(=O)nc3o2)cc1
44378793	0	O=c1[nH]c(=O)n([C@H]2CC(O)C(CO)S2)cc1Cl
145951203	0	CC(=O)C1=C(C)N(Cc2cn(Cc3ccc([N+](=O)[O-])cc3)nn2)C(=O)NC1c1ccccc1
137646910	0	C[C@H](NP(=O)(OCC(CO)CCn1cnc2c(Cl)nc(N)nc21)Oc1ccccc1)C(=O)OCc1ccccc1
71456418	0	CCCCNc1nc(N)nc2c1ncn2C/C=C/CP(=O)(OCOC(=O)C(C)(C)C)OCOC(=O)C(C)(C)C
137661435	0	C[C@H](NP(=O)(OCC(CCn1cnc2c(Cl)nc(N)nc21)COP(=O)(N[C@@H](C)C(=O)OCc1ccccc1)Oc1ccccc1)Oc1ccccc1)C(=O)OCc1ccccc1
137637615	0	CCCCCCCCCCCCCCCCCCOCCNc1ncn(CCOCP(=O)(OCCOCCCCCCCCCCCCCCCCCC)OCCOCCCCCCCCCCCCCCCCCC)c(=O)n1
145962576	0	C/C(=C\CP(=O)(N[C@@H](C)C(=O)OC(C)C)Oc1cccc2ccccc12)Cn1cc(C)c(=O)[nH]c1=O
155543860	0	O=C1O/C(=C\Cn2cc(-c3ccc(Br)cc3)nn2)C(OCc2ccccc2)=C1OCc1ccccc1
16732890	0	COc1nc(CC(C)(O)c2ccc(F)cc2)c(C)c(OC)n1
122180137	0	CCOP(=O)(OCC)[C@@H]1C[C@H](C(=O)Nc2cc3c4c(cccc4c2)C(=O)N(CC(C)C)C3=O)ON1C
10461379	0	CCCCCCCCCCCCCCCCOCCCOP(=O)(O)COCCn1cc(Br)c(N)nc1=O
11391443	0	Nc1nc(F)c2ncn(/C=C3\CC3(CO)CO)c2n1
44378971	0	O=C1NC(=O)N(C2CC(O)C(CO)S2)C2CCCC12
44378732	0	C=C(C)c1cn([C@H]2CC(O)C(CO)S2)c(=O)[nH]c1=O
44386538	0	CCc1cn([C@@H]2C[C@@H](O)[C@H](CO)S2)c(=O)[nH]c1=O
135412761	0	Nc1nc2c(ncn2[C@@H]2CO[C@H](CO)[C@H]2CO)c(=O)[nH]1
5272906	0	CCc1nn([C@H]2C[C@H](O)[C@@H](CO)S2)c(=O)[nH]c1=O
50993639	0	Cc1cn(C/C=C\CP(=O)(OCOC(=O)C(C)(C)C)OCOC(=O)C(C)(C)C)c(=O)[nH]c1=O
54728123	0	CC(=O)OC[C@H]1O[C@@H](n2cc(C(c3c(O)cc(C)oc3=O)c3c(O)cc(C)oc3=O)c(=O)[nH]c2=O)C[C@@H]1OC(C)=O
71452910	0	CC(C)(C)C(=O)OCOP(=O)(C/C=C/Cn1cnc2c(=O)n3ccnc3[nH]c21)OCOC(=O)C(C)(C)C
137661674	0	CC(C)(C)C(=O)OCOP(=O)([O-])COCCn1cnc(N)nc1=O.[Na+]
56672131	0	Nc1ncnc2c1ncn2CCOCP(=O)(O)OCCOCCOCCOCCOCCOCCO
137652890	0	C[C@H](NP(=O)(OCC(CCn1cnc2c(=O)[nH]c(N)nc21)COP(=O)(N[C@@H](C)C(=O)OCc1ccccc1)Oc1ccccc1)Oc1ccccc1)C(=O)OCc1ccccc1
137638329	0	C[C@H](NP(=O)(OCC(CO)CCn1cnc2c(=O)[nH]c(N)nc21)Oc1ccccc1)C(=O)OCc1ccccc1
168290377	0	CC(CO)(Cn1ccc(N)nc1=O)OCP(=O)(O)O.CCN(CC)CC
155535881	0	O=c1c2ncn(CCC(CO)CO)c2nc2[nH]c(-c3ccc(C(F)(F)F)cc3)cn12
44427741	0	CCCCCC(O)C#Cc1cn(C/C=C2\OC(=O)C(OCc3ccccc3)=C2OCc2ccccc2)c(=O)[nH]c1=O
86578905	0	CCCCCCCC(=O)NCC#Cc1cn([C@H]2C[C@H](O)[C@@H](COP(=O)(N[C@@H](C)C(=O)OC)Oc3cccc4ccccc34)O2)c(=O)[nH]c1=O
44416395	0	CCOC(=O)/C(C#N)=C/c1cn([C@H]2C[C@H](O)[C@@H](CO)O2)c(=O)[nH]c1=O
145961262	0	C/C(=C\CP(=O)(N[C@@H](C)C(=O)OCc1ccccc1)Oc1ccccc1)Cn1cc(C)c(=O)[nH]c1=O
135885202	0	Nc1nc2c(ncn2/C=C2/C[C@H]2[C@@H](O)CO)c(=O)[nH]1
90665346	0	O=c1[nH]c(=O)n(C2C=CC(O)C2)cc1-c1cncs1
145963246	0	C/C(=C\CP(=O)(N[C@@H](C)C(=O)OCc1ccccc1)Oc1cccc2c1CCCC2)Cn1cc(C)c(=O)[nH]c1=O
71460123	0	CC(C)(C)C(=O)OCOP(=O)(C/C=C/Cn1cnc2c(NC3CC3)ncnc21)OCOC(=O)C(C)(C)C
53320362	0	C[C@H](NC(=O)[C@]1(Cc2ccccc2)CCN1C(=O)Oc1cccc2ccccc12)C(N)=O
54728121	0	CC(=O)OC[C@H]1O[C@@H](n2cc(C(c3c(O)cc(C)n(C)c3=O)c3c(O)cc(C)n(C)c3=O)c(=O)[nH]c2=O)C[C@@H]1OC(C)=O
51040859	0	O=c1[nH]c(=O)n([C@H]2C[C@H](O)[C@@H](CO)O2)cc1-c1cn(-c2ccc(Cl)cc2)nn1
46231998	0	CC(=O)OC[C@H]1O[C@@H](n2cc(C3C(C#N)=C(N)Oc4cc(C)oc(=O)c43)c(=O)[nH]c2=O)C[C@@H]1OC(C)=O
145963324	0	COc1ccc(OC)c(C2NC(=O)N(Cc3cn(Cc4ccc([N+](=O)[O-])cc4)nn3)C(C)=C2C(C)=O)c1
137656031	0	CC(C)OC(=O)OCOP(=O)(O)COCCn1cnc(N)nc1=O
145950924	0	CC(=O)C1=C(C)N(Cc2cn(Cc3ccccc3)nn2)C(=O)NC1c1ccc(OCc2cn(Cc3ccccc3)nn2)cc1
137632609	0	CCOP(=O)(OCC)[C@H]1C[C@@H](Cn2c(=O)n(C(=O)c3ccccc3)c(=O)c3ccccc32)ON1Cc1ccccc1
137660929	0	CC(C)OC(=O)[C@H](C)NP(=O)(OCC(CO)OCn1cnc2c(=O)[nH]c(N)nc21)Oc1cccc2ccccc12
137650259	0	CCOP(=O)(OCC)[C@H]1C[C@@H](Cn2c(=O)n(C(=O)c3ccccc3)c(=O)c3ccccc32)ON1C
24763817	0	Cc1cn([C@@H]2O[C@H](CO[Si](C)(C)C(C)(C)C(C)C)[C@@]3(OS(=O)(=O)C=C3NC(=O)NC(=O)c3ccccc3)[C@H]2O[Si](C)(C)C(C)(C)C)c(=O)n(C)c1=O
25107719	0	Cc1cn([C@@H]2O[C@H](CO[Si](C)(C)C(C)(C)C(C)C)[C@@]3(OS(=O)(=O)C=C3NC(=O)NC(=O)c3ccccc3)[C@H]2O[Si](C)(C)C(C)(C)C(C)C)c(=O)n(C)c1=O
122180139	0	CCOP(=O)(OCC)[C@@H]1C[C@H](C(=O)Nc2cc3c4c(cccc4c2)C(=O)N(CCN(C)C)C3=O)ON1C
11482796	0	COc1nc(N)nc2c1ncn2/C=C1\CC1(CO)CO
46876057	0	N#CNC(CI)c1cn(C2O[C@H](CO)[C@@H](O)[C@@H]2O)c(=O)[nH]c1=O
155522009	0	O=C1O/C(=C\Cn2cc(-c3cccc(O)c3)nn2)C(OCc2ccccc2)=C1OCc1ccccc1
164622782	0	CCCCCCCCCCOc1ccc2c(c1)N(C)c1nc(=O)n([C@H]3C[C@H](O)[C@@H](CO)O3)cc1O2
137638613	0	CCOP(=O)(OCC)[C@@H]1C[C@@H](Cn2c(=O)n(C(=O)c3ccc(F)cc3)c(=O)c3ccccc32)ON1C
44379243	0	COCc1cn(C2CC(O)C(CO)S2)c(=O)[nH]c1=O
137651276	0	COc1nc(N)nc2c1ncn2CCC(COP(=O)(N[C@@H](C)C(=O)OC1CCCCC1)Oc1cccc2ccccc12)COP(=O)(N[C@@H](C)C(=O)OC1CCCCC1)Oc1cccc2ccccc12
145966797	0	CCCCCCCCCCCCCCCOCCCOP(=O)(C/C=C/Cn1cc(C)c(=O)[nH]c1=O)OCOC(=O)OC(C)C
44378614	0	O=c1[nH]c(=O)n([C@H]2CC(O)C(CO)S2)cc1/C=C/Cl
44379244	0	COCCc1cn([C@H]2CC(O)C(CO)S2)c(=O)[nH]c1=O
44379223	0	CC(=O)c1cn(C2CC(O)C(CO)S2)c(=O)[nH]c1=O
44378895	0	O=c1[nH]c(=O)n([C@H]2CC(O)C(CO)S2)cc1C=C(F)F
155531244	0	CC(C)(C)c1cn(C/C=C2\OC(=O)C(OCc3ccccc3)=C2OCc2ccccc2)nn1
44427743	0	O=C1O/C(=C\Cn2cc(C#CCCc3ccccc3)c(=O)[nH]c2=O)C(OCc2ccccc2)=C1OCc1ccccc1
11436561	0	Nc1ncnc2c1ncn2/C=C1\CC1(CO)CO
122192838	0	O=C(Cn1c(=O)ccn(CCCCCOc2ccc(Br)cc2)c1=O)Nc1ccc(OCc2ccccc2)cc1
137632889	0	C[C@H](NP(=O)(OCC(CCn1cnc2c(=O)[nH]c(/N=C/N(C)C)nc21)COP(=O)(N[C@@H](C)C(=O)OCc1ccccc1)Oc1cccc2ccccc12)Oc1cccc2ccccc12)C(=O)OCc1ccccc1
44378965	0	O=c1[nH]c(=O)n([C@H]2CC(O)C(CO)S2)cc1[N+](=O)[O-]
492104	0	C=CCCCCc1cc2cn([C@H]3C[C@H](O)[C@@H](CO)O3)c(=O)nc2o1
6479049	0	C/C=C/c1cccc(-c2cc3cn([C@H]4C[C@H](O)[C@@H](CO)O4)c(=O)nc3o2)c1
56945006	0	CC(C)(C)C(=O)OCOP(=O)(C/C=C/Cn1cnc2c(N)ncnc21)OCOC(=O)C(C)(C)C
137634608	0	CCOP(=O)(OCC)[C@@H]1C[C@@H](Cn2c(=O)n(C(=O)c3ccccc3)c(=O)c3ccccc32)ON1C
70690161	0	COCCOc1nc(N)nc2c1ncn2/C=C1/CC1(CO)CO
60167462	0	CC(O)CC#CC#Cc1cn([C@H]2C[C@H](O)[C@@H](CO)O2)c(=O)[nH]c1=O
44379306	0	CC(O)c1cn(C2CC(O)C(CO)S2)c(=O)[nH]c1=O
42629966	0	C/C=C/c1ccccc1-c1cc2cn([C@H]3C[C@H](O)[C@@H](CO)O3)c(=O)nc2o1
134382692	0	CCCCCOC(=O)C[C@H](NP(=O)(CO[C@@H](CF)Cn1cc(C)c(=O)[nH]c1=O)Oc1ccccc1)C(=O)OCCCCC
71454687	0	CC(C)(C)C(=O)OCOP(=O)(C/C=C/Cn1cnc2c(N)nc(N)nc21)OCOC(=O)C(C)(C)C
135541418	0	CCCCCCCCCCCCCCCCOCCCOP(=O)(O)CC/C=C\Cn1cnc2c(=O)[nH]c(N)nc21
44319468	0	CC(C)[C@H]1CC[C@H](C)C[C@@H]1OC[C@@H]1OC(n2cc(/C=C/Br)c(=O)[nH]c2=O)CS1
135542259	0	Nc1nc2c(ncn2C[C@@H](CF)OCP(=O)(O)O)c(=O)[nH]1
9991657	0	Nc1ncnc2c1ncn2/C=C1/CC1(F)CO
3010084	0	O=C(Nc1ccc(NC(=S)NCc2cc(C(F)(F)F)cc(C(F)(F)F)c2)cn1)c1csnn1
3010079	0	O=C(Nc1ccc(NC(=S)NC(c2ccccc2)c2cc(C(F)(F)F)cc(C(F)(F)F)c2)cc1)c1csnn1
3010085	0	C[C@@H](NC(=S)Nc1ccc(NC(=O)c2cscn2)nc1)c1cc(C(F)(F)F)cc(C(F)(F)F)c1
3010078	0	CCCC(NC(=S)Nc1ccc(NC(=O)c2csnn2)cc1)c1cc(C(F)(F)F)cc(C(F)(F)F)c1
3010077	0	CCC(NC(=S)Nc1ccc(NC(=O)c2csnn2)cc1)c1cc(C(F)(F)F)cc(C(F)(F)F)c1
44427746	0	CCCCc1ccc(C#Cc2cn(C/C=C3\OC(=O)C(OCc4ccccc4)=C3OCc3ccccc3)c(=O)[nH]c2=O)cc1
44427745	0	Cc1ccc(C#Cc2cn(C/C=C3\OC(=O)C(OCc4ccccc4)=C3OCc3ccccc3)c(=O)[nH]c2=O)cc1
44427737	0	CCCCCC#Cc1cn(C/C=C2\OC(=O)C(OCc3ccccc3)=C2OCc2ccccc2)c(=O)[nH]c1=O
44427748	0	CCCCc1cc2cn(C/C=C3\OC(=O)C(OCc4ccccc4)=C3OCc3ccccc3)c(=O)nc2o1
60145348	0	Cc1nc(NCCCNc2ccnc3cc(Cl)ccc23)nc(-c2cccc([N+](=O)[O-])c2)c1C(=O)OC(C)C
60145502	0	Cc1nc(NCCCCNc2ccnc3cc(Cl)ccc23)nc(-c2ccccc2[N+](=O)[O-])c1C(=O)OC(C)C
72204121	0	CCOC(=O)c1c(C)nc(OCCCNc2ccnc3cc(Cl)ccc23)nc1-c1ccccc1
3010083	0	CCC(NC(=S)Nc1ccc(NC(=O)c2cscn2)cc1)c1cc(C(F)(F)F)cc(C(F)(F)F)c1
3010087	0	C[C@H](NC(=S)Nc1ccc(NC(=O)c2csnn2)nc1)c1cc(C(F)(F)F)cc(C(F)(F)F)c1
3010075	0	CC(NC(=S)Nc1ccc(NC(=O)c2csnn2)cc1)c1cc(C(F)(F)F)cc(C(F)(F)F)c1
44427738	0	CCCCCCC#Cc1cn(C/C=C2\OC(=O)C(OCc3ccccc3)=C2OCc2ccccc2)c(=O)[nH]c1=O
122192835	0	O=C(Cn1c(=O)ccn(CCCCCCCCOc2ccc(Br)cc2)c1=O)Nc1ccc(Oc2ccccc2)cc1
137657242	0	CSc1nc(NCCCCNc2ccnc3cc(Cl)ccc23)c(C#N)c(-c2ccc([N+](=O)[O-])cc2)n1
137638892	0	CSc1nc(OCCCNc2ccnc3cc(Cl)ccc23)c(C#N)c(-c2ccccc2)n1
137647603	0	CSc1nc(NCCCCNc2ccnc3cc(Cl)ccc23)c(C#N)c(-c2cccc([N+](=O)[O-])c2)n1
137641728	0	CCCCCCCCCCCCCCCCCCOCCOP(=O)(COCCn1cnc(N)nc1=O)OCCOCCCCCCCCCCCCCCCCCC
18463472	0	CC(C)(NC(=S)Nc1ccc(NC(=O)c2csnn2)cc1)c1cc(C(F)(F)F)cc(C(F)(F)F)c1
25257897	0	CCC1(Cc2ccccc2)OS(=O)(=O)C=C1OCc1ccc(Cl)c(Cl)c1
3010082	0	C[C@H](NC(=S)Nc1ccc(NC(=O)c2cscn2)cc1)c1cc(C(F)(F)F)cc(C(F)(F)F)c1
3010076	0	C[C@H](NC(=S)Nc1ccc(NC(=O)c2csnn2)cc1)c1cc(C(F)(F)F)cc(C(F)(F)F)c1
3010081	0	C[C@@H](NC(=S)Nc1ccc(NC(=O)c2cscn2)cc1)c1cc(C(F)(F)F)cc(C(F)(F)F)c1
3010086	0	C[C@H](NC(=S)Nc1ccc(NC(=O)c2cscn2)nc1)c1cc(C(F)(F)F)cc(C(F)(F)F)c1
72204119	0	Cc1nc(NCCCCNc2ccnc3cc(Cl)ccc23)nc(-c2ccccc2)c1C(=O)OC(C)C
72204307	0	CCOC(=O)c1c(C)nc(NCCCCNc2ccnc3cc(Cl)ccc23)nc1-c1ccc(F)cc1
72204118	0	COC(=O)c1c(C)nc(NCCCNc2ccnc3cc(Cl)ccc23)nc1-c1ccccc1
3010074	0	O=C(Nc1ccc(NC(=S)NCc2cc(C(F)(F)F)cc(C(F)(F)F)c2)cc1)c1csnn1
72204306	0	CCOC(=O)c1c(C)nc(NCCCCNc2ccnc3cc(Cl)ccc23)nc1-c1ccc(Cl)cc1
137636639	0	N#Cc1c(NCCCCNc2ccnc3cc(Cl)ccc23)nc(N2CCOCC2)nc1-c1ccccc1
72204120	0	CCOC(=O)c1c(C)nc(NCCCCNc2ccnc3cc(Cl)ccc23)nc1-c1ccccc1[N+](=O)[O-]
136244580	0	CCCCCc1nc(N)[nH]c(=O)c1Br
122192844	0	O=C(Cn1c(=O)ccn(Cc2ccc(Oc3ccc(Br)cc3)cc2)c1=O)Nc1ccc(Oc2ccccc2)cc1
2719	0	CCN(CC)CCCC(C)Nc1ccnc2cc(Cl)ccc12
137651709	0	COc1cc(-c2nc(SC)nc(NCCCCNc3ccnc4cc(Cl)ccc34)c2C#N)cc(OC)c1OC
137632078	0	CSc1nc(NCCCNc2ccnc3cc(Cl)ccc23)c(C#N)c(-c2ccccc2)n1
137642067	0	CSc1nc(NCCCCNc2ccnc3cc(Cl)ccc23)c(C#N)c(-c2ccccc2)n1
137645608	0	CSc1nc(NCCCCNc2ccnc3cc(Cl)ccc23)c(C#N)c(-c2ccc(C)cc2)n1
137633976	0	COc1ccc(-c2nc(SC)nc(NCCCCNc3ccnc4cc(Cl)ccc34)c2C#N)cc1
162647575	0	CCCCCc1ccc(C#Cc2c(-c3ccc(C)cc3)oc3nc(=O)n([C@H]4C[C@H](OC(C)=O)[C@@H](COC(C)=O)O4)cc23)cc1
472372	0	Nc1nc(=O)n([C@@H]2CO[C@H](CO)[C@H]2CO)cc1I
44427755	0	O=C1O/C(=C\Cn2cc3cc(-c4ccc(Br)cc4)oc3nc2=O)C(OCc2ccccc2)=C1OCc1ccccc1
44427742	0	C#CCCCC#Cc1cn(C/C=C2\OC(=O)C(OCc3ccccc3)=C2OCc2ccccc2)c(=O)[nH]c1=O
44427756	0	Cc1ccc(-c2cc3cn(C/C=C4\OC(=O)C(OCc5ccccc5)=C4OCc4ccccc4)c(=O)nc3o2)cc1
44427757	0	CCCCc1ccc(-c2cc3cn(C/C=C4\OC(=O)C(OCc5ccccc5)=C4OCc4ccccc4)c(=O)nc3o2)cc1
44427758	0	CCCCCc1ccc(-c2cc3cn(C/C=C4\OC(=O)C(OCc5ccccc5)=C4OCc4ccccc4)c(=O)nc3o2)cc1
44427754	0	O=C1O/C(=C\Cn2cc3cc(CCc4ccccc4)oc3nc2=O)C(OCc2ccccc2)=C1OCc1ccccc1
44427749	0	CCCCCc1cc2cn(C/C=C3\OC(=O)C(OCc4ccccc4)=C3OCc3ccccc3)c(=O)nc2o1
44427750	0	CCCCCCc1cc2cn(C/C=C3\OC(=O)C(OCc4ccccc4)=C3OCc3ccccc3)c(=O)nc2o1
44427751	0	CCCCCCCCc1cc2cn(C/C=C3\OC(=O)C(OCc4ccccc4)=C3OCc3ccccc3)c(=O)nc2o1
44427733	0	CCCCC#Cc1cn(C/C=C2\OC(=O)C(OCc3ccccc3)=C2OCc2ccccc2)c(=O)[nH]c1=O
44427739	0	CCCCCCCCC#Cc1cn(C/C=C2\OC(=O)C(OCc3ccccc3)=C2OCc2ccccc2)c(=O)[nH]c1=O
470132	0	Cc1cn([C@@H]2CO[C@H](CO)[C@H]2CO)c(=O)[nH]c1=O
15986890	0	CCCCCCCCCCCCCCCCOCCCOP(=O)(O)CC/C=C\Cn1cnc2c(N)ncnc21
16732730	0	COc1nc(C)c(-c2ccccc2)c(OC)n1
16732731	0	COc1nc(CC(C)(O)C(F)(F)F)c(-c2ccccc2)c(OC)n1
16732887	0	COc1cc(/C=C(\C)c2ccc(F)cc2)nc(OC)n1
136177300	0	COc1cc(/C=C(/O)c2ccc(F)cc2)nc(OC)n1
71601272	0	COC(=O)[C@@H](NP(=O)(Oc1ccccc1)O[C@H]1O[C@H](CO)[C@@H](O)C1(F)F)C(C)C
71601410	0	C[C@H](NP(=O)(Oc1cccc2ccccc12)O[C@H]1O[C@H](CO)[C@@H](O)C1(F)F)C(=O)OC1CCCCC1
71601270	0	COC(=O)[C@H](C)NP(=O)(Oc1ccccc1)O[C@H]1O[C@H](CO)[C@@H](O)C1(F)F
73356520	0	C[C@H](NP(=O)(Oc1ccccc1)O[C@@H]1O[C@H](CO)[C@@H](O)C1(F)F)C(=O)OC1CCCCC1
73350479	0	COC(=O)[C@H](C)NP(=O)(Oc1cccc2ccccc12)O[C@@H]1O[C@H](CO)[C@@H](O)C1(F)F
73351995	0	COC(=O)[C@@H](NP(=O)(Oc1cccc2ccccc12)O[C@@H]1O[C@H](CO)[C@@H](O)C1(F)F)C(C)C
73350478	0	C[C@H](NP(=O)(Oc1cccc2ccccc12)O[C@@H]1O[C@H](CO)[C@@H](O)C1(F)F)C(=O)OCC(C)(C)C
73356519	0	C[C@H](NP(=O)(Oc1ccccc1)O[C@@H]1O[C@H](CO)[C@@H](O)C1(F)F)C(=O)OCC(C)(C)C
71601269	0	C[C@H](NP(=O)(Oc1ccccc1)O[C@H]1O[C@H](CO)[C@@H](O)C1(F)F)C(=O)OCC(C)(C)C
73351994	0	COC(=O)[C@H](C)NP(=O)(Oc1ccccc1)O[C@@H]1O[C@H](CO)[C@@H](O)C1(F)F
73356521	0	COC(=O)[C@@H](NP(=O)(Oc1ccccc1)O[C@@H]1O[C@H](CO)[C@@H](O)C1(F)F)C(C)C
73351993	0	C[C@H](NP(=O)(Oc1cccc2ccccc12)O[C@@H]1O[C@H](CO)[C@@H](O)C1(F)F)C(=O)OC1CCCCC1
71601271	0	C[C@H](NP(=O)(Oc1ccccc1)O[C@H]1O[C@H](CO)[C@@H](O)C1(F)F)C(=O)OC1CCCCC1
72204308	0	CCOC(=O)c1cnc(NCCCCNc2ccnc3cc(Cl)ccc23)nc1C
136244490	0	CCCCc1nc(N)[nH]c(=O)c1Br
77843996	0	CCCCCCCC(=O)NCC#Cc1cn([C@H]2C[C@H](O)[C@@H](COP(=O)(N[C@@H](C)C(=O)OCc3ccccc3)Oc3ccccc3)O2)c(=O)[nH]c1=O
86578942	0	CCCCCCCC(=O)NCC#Cc1cn([C@H]2C[C@H](O)[C@@H](COP(=O)(N[C@@H](C)C(=O)OCc3ccccc3)Oc3cccc4ccccc34)O2)c(=O)[nH]c1=O
86578941	0	CCCCCCCC(=O)NCC#Cc1cn([C@H]2C[C@H](O)[C@@H](COP(=O)(N[C@@H](C)C(=O)OCC(C)C)Oc3cccc4ccccc34)O2)c(=O)[nH]c1=O
71601407	0	COC(=O)[C@@H](NP(=O)(Oc1cccc2ccccc12)O[C@H]1O[C@H](CO)[C@@H](O)C1(F)F)C(C)C
71601408	0	C[C@H](NP(=O)(Oc1cccc2ccccc12)O[C@H]1O[C@H](CO)[C@@H](O)C1(F)F)C(=O)OCC(C)(C)C
45487934	0	CCCCCc1ccc(-c2cc3cn([C@@H]4O[C@H](CO)[C@@H](O)[C@H]4F)c(=O)nc3o2)cc1
50993714	0	CC(C)(C)C(=O)OCOP(=O)(C/C=C/Cn1cc(Br)c(=O)[nH]c1=O)OCOC(=O)C(C)(C)C
60145346	0	CCOC(=O)c1c(C)nc(NCCCNc2ccnc3cc(Cl)ccc23)nc1C
60145026	0	CCOC(=O)c1c(C)nc(NCCNc2ccnc3cc(Cl)ccc23)nc1-c1ccccc1
60145028	0	CCOC(=O)c1c(C)nc(NCCCCNc2ccnc3cc(Cl)ccc23)nc1-c1ccccc1
60145500	0	Cc1nc(NCCNc2ccnc3cc(Cl)ccc23)nc(-c2ccccc2[N+](=O)[O-])c1C(=O)OC(C)C
60145027	0	CCOC(=O)c1c(C)nc(NCCCNc2ccnc3cc(Cl)ccc23)nc1-c1ccccc1
60145347	0	CCOC(=O)c1c(C)nc(NCCCCNc2ccnc3cc(Cl)ccc23)nc1C
60167324	0	O=c1[nH]c(=O)n([C@H]2C[C@H](O)[C@@H](CO)O2)cc1C#CC#Cc1ccc([N+](=O)[O-])cc1
71601409	0	COC(=O)[C@H](C)NP(=O)(Oc1cccc2ccccc12)O[C@H]1O[C@H](CO)[C@@H](O)C1(F)F
60167177	0	O=c1[nH]c(=O)n([C@H]2C[C@H](O)[C@@H](CO)O2)cc1C#CC#Cc1ccccc1
71458272	0	CC(C)(C)C(=O)OCOP(=O)(C/C=C/Cn1cnc2c(NC3CCCCC3)nc(N)nc21)OCOC(=O)C(C)(C)C
56945093	0	CC(C)c1ccc(Nc2ncnc3c2ncn3C/C=C/CP(=O)(OCOC(=O)C(C)(C)C)OCOC(=O)C(C)(C)C)cc1
71456420	0	CC(C)(C)C(=O)OCOP(=O)(C/C=C/Cn1cnc2c(Cl)ncnc21)OCOC(=O)C(C)(C)C
136238815	0	CC(C)(C)C(=O)OCOP(=O)(C/C=C/Cn1cnc2c(=O)[nH]cnc21)OCOC(=O)C(C)(C)C
71460122	0	CC(C)(C)C(=O)OCOP(=O)(C/C=C/Cn1cnc2c(NC3CCCCC3)ncnc21)OCOC(=O)C(C)(C)C
51040860	0	O=c1[nH]c(=O)n([C@H]2C[C@H](O)[C@@H](CO)O2)cc1-c1cn(-c2ccc(Br)cc2)nn1
168269372	0	C#CC(CO)(Cn1ccc(N)nc1=O)OCP(=O)(O)O.CCN(CC)CC
6474314	0	Nc1ncnc2c1ncn2CC(/C=C/P(=O)(O)O)CO
25256977	0	O=S1(=O)C=C(OCc2ccccc2)C2(CCc3ccccc3C2)O1
25257677	0	C=CCOC1=CS(=O)(=O)OC1(CC)Cc1ccccc1
25256976	0	CC(C)C1(Cc2ccccc2)OS(=O)(=O)C=C1OCc1ccccc1
11992134	0	N#CC1=C(N)OC2=C(C(=O)CCC2)C1c1cn([C@H]2C[C@H](O)[C@@H](CO)O2)c(=O)[nH]c1=O
137654248	0	CCOP(=O)(OCC)[C@@H]1C[C@@H](Cn2c(=O)n(C(=O)c3cccc(F)c3)c(=O)c3ccccc32)ON1C
122192839	0	O=C(Cn1c(=O)ccn(CCCCCOc2ccc(Br)cc2)c1=O)Nc1ccccc1
160355	0	CC[C@H](CO)Nc1nc(NCc2ccccc2)c2ncn(C(C)C)c2n1
131723	0	Cc1cn2c(=O)c3ncn(COC(CO)CO)c3nc2[nH]1
488239	0	N#CNC(CI)c1cn([C@H]2C[C@H](O)[C@@H](CO)O2)c(=O)[nH]c1=O
155537643	0	O=C1O/C(=C\Cn2cc(-c3cc(F)cc(F)c3)nn2)C(OCc2ccccc2)=C1OCc1ccccc1
44591243	0	NC1C=CN(/C=C2\CC2(F)CO)C(=O)N1
6536768	0	Nc1ccn(/C=C2\CC2(F)CO)c(=O)n1
135465936	0	Nc1nc2c(ncn2OCC(/C=C/P(=O)(O)O)CO)c(=O)[nH]1
15604878	0	CC1=NN(c2ccccc2)C(=O)/C1=C\c1cn([C@H]2C[C@H](O)[C@@H](CO)O2)c(=O)[nH]c1=O
44416697	0	N#CC(C#N)=Cc1cn([C@H]2C[C@H](O)[C@@H](CO)O2)c(=O)[nH]c1=O
476987	0	O=c1[nH]c(=O)n([C@@H]2CO[C@H](CO)O2)cc1I
135410376	0	Nc1nc2c(ncn2CC(/C=C/P(=O)(O)O)CO)c(=O)[nH]1
480980	0	O=C1c2ccccc2N(Cc2ccccc2Cl)S(=O)(=O)N1Cc1ccccc1
16756973	0	CCCCCc1ccc(C#Cc2cc3cn([C@H]4C[C@H](O)[C@@H](CO)O4)c(=O)nc3o2)cc1
145949869	0	CC(=O)C1=C(C)N(Cc2cn(Cc3ccccc3)nn2)C(=O)N(Cc2cn(Cc3ccccc3)nn2)C1c1ccc(N(C)C)cc1
145961829	0	C/C(=C/CP(=O)(N[C@@H](C)C(=O)OCc1ccccc1)Oc1cccc2c1CCCC2)Cn1cc(C)c(=O)[nH]c1=O
343428	0	Nc1ccn(COC(CO)CO)c(=O)n1
145987250	0	C#C[C@@]1(O)[C@@H](CO)O[C@@H](n2cc(Cl)c3c(N)ccnc32)[C@@H]1O
5272220	0	CCC(NC(=S)Nc1ccc(NC(=O)c2ccccc2F)cc1)c1ccc(F)cc1
16756645	0	CCCCCc1ccc(CCc2cc3cn([C@H]4C[C@H](O)[C@@H](CO)O4)c(=O)nc3o2)cc1
56668650	0	Nc1ncnc2c1ncn2CCOCP(=O)(O)OCCOCCCCCCCCCCO
70688130	0	CC(C)CSc1nc(N)nc2c1ncn2/C=C1/CC1(CO)CO
515113	0	COc1nc(N)nc2c1ncn2CCC(CO)CO
497010	0	COC(=O)c1nc2cc(Cl)c(Cl)cc2n1S(=O)(=O)c1ccc([N+](=O)[O-])cc1
135966066	0	Nc1nc2c(ncn2/C=C2\CC2(CO)CCP(=O)(O)O)c(=O)[nH]1
25257678	0	CCC1(Cc2ccccc2)OS(=O)(=O)C=C1OCC#N
492103	0	C=CCCCc1cc2cn([C@H]3C[C@H](O)[C@@H](CO)O3)c(=O)nc2o1
135432844	0	Nc1nc2c(ncn2CC/C=C/P(=O)(O)O)c(=O)[nH]1
70696459	0	CN(C)c1nc(N)nc2c1ncn2/C=C1/CC1(CO)CO
25257201	0	CCC1(Cc2ccccc2)OS(=O)(=O)C=C1OC
162644297	0	CCN(CC)CC.Cc1cn(CC(C#N)(CO)OCP(=O)(O)O)c(=O)[nH]c1=O
168277787	0	C#CC(CO)(Cn1cnc2c(=O)[nH]c(N)nc21)OCP(=O)(O)O.CCN(CC)CC
135480760	0	Nc1nc2c(ncn2OCC(O)CO)c(=O)[nH]1
25256974	0	CCC1(CC)OS(=O)(=O)C=C1OCc1ccccc1
145984867	0	CC(C)OC(=O)[C@H](C)NP(=O)(CO[C@@H]1C[C@@H](O)[C@H](n2cnc3c(=O)[nH]c(N)nc32)C1)N[C@@H](C)C(=O)OC(C)C
464205	0	C[C@H](Cn1cnc2c(N)ncnc21)OCP(=O)(O)O
145987778	0	CCc1cn([C@@H]2C[C@H](O)[C@@H](CO)O2)c(=O)c[n+]1[O-]
11666388	0	CCCCCCCCC#Cc1cc2cn(C)c(=O)nc2o1
11425738	0	Nc1nc(Cl)c2ncn(CCC(CO)CO)c2n1
472371	0	Cc1cn([C@@H]2CO[C@H](CO)[C@H]2CO)c(=O)nc1N
11528737	0	CCCCC#Cc1cc2cn(C)c(=O)nc2o1
56675521	0	Nc1ncnc2c1ncn2CCOCP(=O)(O)OCCCCCCCCC(O)CO
145986222	0	Cc1cn([C@@H]2C[C@H](OCP(=O)(O)O)C[C@H]2O)c(=O)[nH]c1=O
168269159	0	CCN(CC)CC.Cc1cn(CC(C)(CO)OCP(=O)(O)O)c(=O)[nH]c1=O
3006682	0	Nc1nc(N)c2ncn(/C=C3/CC3(CO)CO)c2n1
53319504	0	O=c1[nH]c(=O)n([C@H]2C[C@H](O)[C@@H](CO)O2)cc1-c1cn(-c2ccccc2)nn1
168295876	0	CC(CO)(Cn1ccc(=O)[nH]c1=O)OCP(=O)(O)O.CCN(CC)CC
473139	0	Nc1ncnc2c1ncn2OCCOCP(=O)(O)O
44273065	0	O=c1[nH]c(=O)n([C@@H]2C(F)[C@H](CO)C2CO)cc1/C=C/Br
488243	0	COC(CN=[N+]=[N-])c1cn([C@H]2C[C@H](O)[C@@H](CO)O2)c(=O)[nH]c1=O
16078858	0	Nc1ncnc2c1ncn2C/C=C\CCP(=O)(O)O
162661450	0	CCN(CC)CC.N#CC(CO)(Cn1cnc2c(N)ncnc21)OCP(=O)(O)O
162658895	0	CCN(CC)CC.N#CC(CO)(Cn1ccc(N)nc1=O)OCP(=O)(O)O
162666559	0	CCN(CC)CC.N#CC(CO)(Cn1ccc(=O)[nH]c1=O)OCP(=O)(O)O
56668651	0	Nc1ncnc2c1ncn2CCOCP(=O)(OCCOCCOCCOCCOCCOCCO)OCCOCCOCCOCCOCCOCCO
473461	0	Nc1ncnc2c1ncn2C[C@@H](CF)OCP(=O)(O)O
11588003	0	CCCCC#Cc1cc2cn([C@H]3C[C@H](O)[C@@H](CO)O3)c(=O)nc2o1
18650313	0	CCc1cn([C@H]2C[C@H](O)[C@@H](CO)O2)c(=O)c[n+]1[O-]
16756192	0	O=c1nc2oc(C#Cc3ccccc3)cc2cn1[C@H]1C[C@H](O)[C@@H](CO)O1
16756294	0	Cc1ccc(CCc2cc3cn([C@H]4C[C@H](O)[C@@H](CO)O4)c(=O)nc3o2)cc1
56658261	0	Nc1ncnc2c1ncn2CCOCP(=O)(OCCOCCCCCCCCC(O)CO)OCCOCCCCCCCCC(O)CO
489671	0	CC1(Br)C(=O)NC(=O)N([C@H]2C[C@H](O)[C@@H](CO)O2)C1N=[N+]=[N-]
25257895	0	CCC1(Cc2ccccc2)OS(=O)(=O)C=C1OCc1ccc(OC)cc1
50901484	0	CC(C)CC(=O)[C@@H](O)Cc1ccccc1
50993715	0	CC(C)(C)C(=O)OCOP(=O)(C/C=C\Cn1cc(Br)c(=O)[nH]c1=O)OCOC(=O)C(C)(C)C
11515791	0	CCCCC#Cc1cc2cn([C@@H]3O[C@H](CO)[C@@H](O)[C@H]3O)c(=O)nc2o1
56678864	0	CCOCCOCCOCCOCCOCCOCCOP(=O)(COCCn1cnc2c(N)ncnc21)OCCOCCOCCOCCOCCOCCOCC
3011372	0	CCOC(=O)Cc1c(N)nc(N)nc1OCCOCP(=O)(O)O
11515176	0	CCCCCCCCCCC#Cc1cc2cn(C)c(=O)nc2o1
11631626	0	CCCCC#Cc1cc2cn([C@@H]3O[C@H](CO)[C@@H](O)[C@@H]3O)c(=O)nc2o1
16078860	0	O=c1ccn(C/C=C\CCP(=O)(O)O)c(=O)[nH]1
16078862	0	Cc1cn(C/C=C\CCP(=O)(O)O)c(=O)[nH]c1=O
135965916	0	Nc1nc2c(ncn2/C=C2\CC23CCP(=O)(O)OC3)c(=O)[nH]1
135446846	0	Nc1nc2c(ncn2OCC(CO)CCP(=O)(O)O)c(=O)[nH]1
118718721	0	O=c1nc(-n2cncn2)ccn1C1S[C@@H](COCc2ccccc2)[C@H](OCc2ccccc2)[C@H]1OCc1ccccc1
118718716	0	Nc1ncnc2c1ncn2C1S[C@@H](COCc2ccccc2)[C@H](OCc2ccccc2)[C@H]1OCc1ccccc1
11145250	0	CC(=O)OC1S[C@@H](COCc2ccccc2)[C@H](OCc2ccccc2)[C@H]1OCc1ccccc1
118718717	0	Nc1ccn(C2S[C@@H](COCc3ccccc3)[C@H](OCc3ccccc3)[C@H]2OCc2ccccc2)c(=O)n1
118718719	0	C[C@@]1(n2ccc(N)nc2=O)CS[C@H](CO)O1
22209801	0	Nc1ccn(C2S[C@@H](CO)[C@H](O)[C@H]2O)c(=O)n1
492386	0	Cc1cn([C@@H]2S[C@@H](CO)[C@H](O)[C@H]2O)c(=O)[nH]c1=O
492383	0	O=c1ccn([C@H]2S[C@@H](CO)[C@H](O)[C@H]2O)c(=O)[nH]1
492384	0	O=c1ccn([C@@H]2S[C@@H](CO)[C@H](O)[C@H]2O)c(=O)[nH]1
492389	0	Nc1ncnc2c1ncn2[C@@H]1S[C@@H](CO)[C@H](O)[C@H]1O
492385	0	Cc1cn([C@H]2S[C@@H](CO)[C@H](O)[C@H]2O)c(=O)[nH]c1=O
492388	0	Nc1ncnc2c1ncn2[C@H]1S[C@@H](CO)[C@H](O)[C@H]1O
118718724	0	O=c1[nH]c(=O)n(C2S[C@@H](CO)[C@H](O)[C@H]2O)cc1Br
71717899	0	O=c1[nH]c(=O)n(C2S[C@@H](CO)[C@H](O)[C@H]2O)cc1F
118718720	0	O=c1[nH]c(=O)n(C2S[C@@H](CO)[C@H](O)[C@H]2O)cc1Cl
6478329	0	Cc1csc2nc([C@H](C)NC(=O)/C=C/c3c(Cl)cccc3Cl)oc(=O)c12
5272259	0	OCC(CO)CCn1cnc2cc(Cl)c(Cl)nc21
3009295	0	Nc1ncnc2c1ncn2OCC(CO)CCP(=O)(O)O
461343	0	Nc1ncnc2c1ncn2OCCCCP(=O)(O)O
71458128	0	NC(=O)c1ncn([C@@H]2O[C@H](CO)[C@@H](O)[C@H]2F)n1
71450956	0	NC(=O)c1ncn([C@H]2O[C@H](CO)[C@@H](O)[C@H]2F)n1
118718444	0	C=C1C[C@](OC)([C@H](O)C(=O)N[C@H]2OCO[C@H]3[C@@H]2O[C@@H]2COC(C)(C)O[C@H]2[C@@H]3OC)O[C@H](C)[C@@H]1C
118718439	0	C=C1C[C@](OC)([C@H](O)C(=O)N[C@@H]2OCO[C@H]3[C@@H]2O[C@@H]2COC(C)(C)O[C@H]2[C@@H]3OC)O[C@H](C)[C@@H]1C
5270781	0	OCC(CO)CCn1cnc2nc(Cl)c(Cl)cc21
6478344	0	Cc1csc2nc([C@H](C)NC(=O)/C=C/c3ccc(Cl)s3)oc(=O)c12
478848	0	Nc1nc(N)c2ncn([C@H]3CCC[C@H]3CO)c2n1
44276566	0	Nc1nc(N)c2nnn([C@H]3CCC[C@H]3CO)c2n1
6478338	0	Cc1cc(/C=C/C(=O)N[C@@H](C)c2nc3scc(C)c3c(=O)o2)c(C)s1
6478343	0	Cc1csc2nc([C@H](C)NC(=O)/C=C/c3ccc(Br)s3)oc(=O)c12
6478349	0	Cc1csc2nc([C@H](C)NC(=O)/C=C/c3ccnc4ccccc34)oc(=O)c12
6478320	0	Cc1csc2nc([C@H](C)NC(=O)/C=C/c3ccccc3)oc(=O)c12
497002	0	CC(C)S(=O)(=O)n1c(CCc2ccccn2)nc2cc(Cl)c(Cl)cc21
3009294	0	Nc1nc(N)c2ncn(OCCCCP(=O)(O)O)c2n1
19808598	0	Nc1nc(N)c2ncn(OCC(CO)CCP(=O)(O)O)c2n1
135966025	0	Nc1nc2c(ncn2/C=C2/CC23CCP(=O)(O)OC3)c(=O)[nH]1
135446845	0	Nc1nc2c(ncn2OCCCCP(=O)(O)O)c(=O)[nH]1
135435109	0	Nc1nc2c(ncn2/C=C2/CC23COP(=O)(O)OC3)c(=O)[nH]1
145985197	0	Nc1ncnc2c1ncn2[C@@H]1C[C@H](OCP(=O)(O)O)C[C@H]1O
25258114	0	CC1(Cc2ccccc2)OS(=O)(=O)C=C1OCc1ccccc1
488242	0	[N-]=[N+]=NCC(O)c1cn([C@H]2C[C@H](O)[C@@H](CO)O2)c(=O)[nH]c1=O
145983124	0	Nc1ccn([C@H]2C[C@H](O)[C@@H](OCP(=O)(O)O)C2)c(=O)n1
59795816	0	Nc1ccn([C@@H]2C[C@H](OCP(=O)(O)O)C[C@H]2O)c(=O)n1
473462	0	Nc1ncnc2c1ncn2C[C@H](CF)OCP(=O)(O)O
11174144	0	Nc1nc(NC2CC2)c2ncn(/C=C3\CC3(CO)CO)c2n1
11587603	0	Cc1cn(C[C@H](CF)OCP(=O)(O)O)c(=O)[nH]c1=O
11507634	0	Cc1cn(C[C@@H](CF)OCP(=O)(O)O)c(=O)[nH]c1=O
101656591	0	Nc1ccn(C[C@H](CF)OCP(=O)(O)O)c(=O)n1
135434793	0	Nc1nc2c(ncn2/C=C2\CC2(CO)CO)c(=O)[nH]1
135702462	0	Nc1nc2c(ncn2[C@H]2C[C@@H](CO)[C@@H]2CO)c(=O)[nH]1
135409256	0	Nc1nc2c(ncn2/C=C2/CC2(CO)CO)c(=O)[nH]1
71508432	0	Nc1ncc(Cl)c2c1ncn2[C@@H]1C[C@H](O)[C@@H](O)[C@H]1O
70696458	0	CC(C)Nc1nc(N)nc2c1ncn2/C=C1/CC1(CO)CO
70681754	0	CC(C)CNc1nc(N)nc2c1ncn2/C=C1/CC1(CO)CO
70683865	0	Nc1nc(NC2CCCCC2)c2ncn(/C=C3/CC3(CO)CO)c2n1
11548272	0	CCCCCCCCCCCCCCCCOCCCOP(=O)(O)COCCn1ccc(N)nc1=O
451929	0	Nc1ccn(CCOCP(=O)(O)O)c(=O)n1
53232136	0	NC(=S)N/N=C/c1ccc(Br)cc1F
57520880	0	Nc1ncc2ncn(/C=C3/CC3(CO)CO)c2n1
70686005	0	Nc1nc(SC2CCCC2)c2ncn(/C=C3/CC3(CO)CO)c2n1
70690162	0	CCCCSc1nc(N)nc2c1ncn2/C=C1/CC1(CO)CO
9973369	0	CCCSc1nc(N)nc2c1ncn2/C=C1/CC1(CO)CO
9972226	0	C=CCOc1nc(N)nc2c1ncn2/C=C1/CC1(CO)CO
70683864	0	CCCNc1nc(N)nc2c1ncn2/C=C1/CC1(CO)CO
70692319	0	Nc1nc(N2CCOCC2)c2ncn(/C=C3/CC3(CO)CO)c2n1
70692320	0	CCCCCCSc1nc(N)nc2c1ncn2/C=C1/CC1(CO)CO
70694377	0	CCCCNc1nc(N)nc2c1ncn2/C=C1/CC1(CO)CO
70694379	0	Nc1nc(N2CCCC2)c2ncn(/C=C3/CC3(CO)CO)c2n1
70688129	0	CNc1nc(N)nc2c1ncn2/C=C1/CC1(CO)CO
70694380	0	Nc1nc(OCC(F)(F)F)c2ncn(/C=C3/CC3(CO)CO)c2n1
30976	0	Nc1nc(N)c2[nH]cnc2n1
501705	0	O=c1nc2oc(CCc3ccccc3)cc2cn1[C@H]1C[C@H](O)[C@@H](CO)O1
135480761	0	Nc1nc2c(ncn2OCCC(O)CO)c(=O)[nH]1
5495576	0	Nc1ccn(/C=C2/CC2(CO)CO)c(=O)n1
3006047	0	Nc1ccn(/C=C2\CC2(CO)CO)c(=O)n1
53324053	0	C[C@H](NC(=O)[C@]1(Cc2ccccc2)CCN1C(=O)Oc1ccccc1)C(N)=O
10313073	0	NC(=O)C(N)O
489848	0	Nc1ncnc2c1ncn2NC(=O)COCP(=O)(O)O
6536769	0	Cc1cn(/C=C2\CC2(F)CO)c(=O)[nH]c1=O
44286506	0	Nc1ncnc2c1ncn2NCCOCP(=O)(O)O
136026542	0	Nc1nc2c(ncn2OCC#CP(=O)(O)O)c(=O)[nH]1
135511260	0	Nc1nc2c(ncn2[C@H]2C=C[C@@H](OCP(=O)(O)O)OC2)c(=O)[nH]1
135511261	0	Nc1nc2c(ncn2[C@@H]2C=C[C@H](OCP(=O)(O)O)OC2)c(=O)[nH]1
44282520	0	Nc1ccn(C2COC(CO)C(O)C2O)c(=O)n1
44282166	0	O=c1[nH]c(=O)n(C2COC(CO)C(O)C2O)cc1I
44282519	0	O=c1ccn(C2COC(CO)C(O)C2O)c(=O)[nH]1
22794317	0	O=c1c[n+]([O-])ccn1[C@@H]1C[C@H](O)[C@@H](CO)O1
135480765	0	Nc1nc2c(ncn2O[C@@H](CO)CCO)c(=O)[nH]1
25257204	0	CCC1(Cc2ccccc2)OS(=O)(=O)C=C1OCC(=O)OC
44280600	0	Nc1ncnc2c1ncn2C1C[C@H](CO)C1CO
25257435	0	CCC1(Cc2ccccc2)OS(=O)(=O)C=C1OC(=O)c1ccccc1
25256975	0	CCCC1(Cc2ccccc2)OS(=O)(=O)C=C1OCc1ccccc1
13604374	0	O=c1c[n+]([O-])ccn1[C@H]1C[C@H](O)[C@@H](CO)O1
3006039	0	Nc1ncnc2c1ncn2/C=C1/CC1(CO)CO
44273062	0	Nc1ccn([C@@H]2C(F)C(CO)[C@@H]2CO)c(=O)n1
6454221	0	Cc1cn([C@@H]2C[C@H](O)[C@@H](CO)O2)c(=O)c[n+]1[O-]
135480762	0	Nc1nc2c(ncn2OC[C@H](O)CO)c(=O)[nH]1
6319959	0	Cc1cn(/C=C2/CC2(CO)CO)c(=O)[nH]c1=O
5271343	0	Cc1cn(/C=C2\CC2(CO)CO)c(=O)[nH]c1=O
164609319	0	O=C1NC(O)C(Br)=CN1COCCO
164620757	0	CN1c2ccccc2Oc2cn([C@H]3C[C@H](O)[C@@H](CO)O3)c(=O)nc21
11778491	0	Nc1nc(Cl)c2ncn(/C=C3/CC3(CO)CO)c2n1
44427752	0	CCCCCC(O)c1cc2cn(C/C=C3\OC(=O)C(OCc4ccccc4)=C3OCc3ccccc3)c(=O)nc2o1
155541259	0	O=C1O/C(=C\Cn2cc(CCO)nn2)C(OCc2ccccc2)=C1OCc1ccccc1
145984706	0	Nc1ncnc2c1ncn2[C@H]1C[C@H](O)[C@@H](OCP(=O)(O)O)C1
136260455	0	CC(C)(O)Cc1nc(N)[nH]c(=O)c1Br
135440532	0	Nc1nc2c(ncn2/C=C2/CC2(F)CO)c(=O)[nH]1
135458117	0	Nc1nc2c(ncn2/C=C2\CC2(F)CO)c(=O)[nH]1
25256973	0	CC1(C(c2ccccc2)c2ccccc2)OS(=O)(=O)C=C1OCc1ccccc1
25258115	0	CC(C)CC1(Cc2ccccc2)OS(=O)(=O)C=C1OCc1ccccc1
25257205	0	CCC1(Cc2ccccc2)OS(=O)(=O)C=C1OC(c1ccccc1)c1ccccc1
25257436	0	CCC1(Cc2ccccc2)OS(=O)(=O)C=C1OCc1ccc([N+](=O)[O-])cc1
25257682	0	CCC1(Cc2ccccc2)OS(=O)(=O)C=C1OS(=O)(=O)c1ccc(C)cc1
135433410	0	Nc1nc2c(ncn2CCCCO)c(=O)[nH]1
53325363	0	C[C@H](NC(=O)[C@]1(Cc2ccccc2)CCN1S(=O)(=O)c1ccc2ccccc2c1)C(N)=O
56665191	0	Nc1ncnc2c1ncn2CCOCP(=O)(O)OCCOCCCCCCCCC(O)CO
101656590	0	Nc1ccn(C[C@@H](CF)OCP(=O)(O)O)c(=O)n1
46232068	0	CCn1c(C)cc2c(c1=O)C(c1cn([C@H]3C[C@H](O)[C@@H](CO)O3)c(=O)[nH]c1=O)C(C#N)=C(N)O2
135981162	0	Nc1nc2c(sc3ncn([C@H]4C[C@H](O)[C@@H](CO)O4)c32)c(=O)[nH]1
162668265	0	CC(=O)OC[C@H]1O[C@@H](n2cc3c(C#CCCO)c(-c4ccc(C)cc4)oc3nc2=O)C[C@@H]1OC(C)=O
46231999	0	Cc1cc2c(c(=O)n1C)C(c1cn([C@H]3C[C@H](O)[C@@H](CO)O3)c(=O)[nH]c1=O)C(C#N)=C(N)O2
145961122	0	C/C(=C\CP(=O)(N[C@@H](C)C(=O)OC(C)C)Oc1ccccc1)Cn1cc(C)c(=O)[nH]c1=O
3010089	0	Cc1cn(COC(CO)CO)c(=O)[nH]c1=O
23179385	0	O=c1[nH]c(=O)n(C2CC(O)C(CO)S2)cc1F
44379069	0	CCc1cn([C@@H]2CC(O)C(CO)S2)c(=O)[nH]c1=O
44379285	0	O=c1[nH]c(=O)n([C@H]2CC(O)C(CO)S2)cc1C(F)=C(Cl)Cl
44379070	0	O=c1[nH]c(=O)n([C@@H]2CC(O)C(CO)S2)cc1[N+](=O)[O-]
44378792	0	N#Cc1cn([C@H]2CC(O)C(CO)S2)c(=O)[nH]c1=O
44378595	0	COc1cn(C2CC(O)C(CO)S2)c(=O)[nH]c1=O
13964461	0	Cc1cn(COC(CO)CO)c(=O)nc1N
3000770	0	O=c1ccn(COC(CO)CO)c(=O)[nH]1
3010094	0	O=c1[nH]c(=O)n(COC(CO)CO)cc1Br
13964469	0	Nc1cn(COC(CO)CO)c(=O)[nH]c1=O
16729174	0	O=c1[nH]c(=O)n(COC(CO)CO)cc1I
13964471	0	CN(C)c1ccn(COC(CO)CO)c(=O)n1
44283739	0	Nc1nc(=O)n(COC(CO)CO)cc1I
472369	0	O=c1ccn([C@@H]2CO[C@H](CO)[C@H]2CO)c(=O)[nH]1
12357924	0	COc1nc(C)c(Br)c(OC)n1
51040856	0	CC(C)c1ccc(-n2cc(-c3cn([C@H]4C[C@H](O)[C@@H](CO)O4)c(=O)[nH]c3=O)nn2)cc1
44427753	0	C#CCCCc1cc2cn(C/C=C3\OC(=O)C(OCc4ccccc4)=C3OCc3ccccc3)c(=O)nc2o1
6536767	0	Nc1ncnc2c1ncn2/C=C1\CC1(F)CO
137645201	0	CCOP(=O)(OCC)[C@H]1C[C@@H](Cn2ccc(=O)n(C(=O)c3ccccc3)c2=O)ON1C
489669	0	[N-]=[N+]=NC1C(Br)C(=O)NC(=O)N1[C@H]1C[C@H](O)[C@@H](CO)O1
11460216	0	Nc1nc(Cl)c2ncn(/C=C3\CC3(CO)CO)c2n1
118706651	0	O=c1cnn(Cc2cn(C[C@H](OCc3ccccc3)[C@@H](O)P(=O)(OCc3ccccc3)OCc3ccccc3)nn2)c(=O)[nH]1
16072393	0	Nc1ncnc2c1ncn2/C=C1/[C@@H](CO)[C@H]1F
46216757	0	Cc1cc2c(c(=O)[nH]1)C(c1cn([C@H]3C[C@H](O)[C@@H](CO)O3)c(=O)[nH]c1=O)C(C#N)=C(N)O2
145962641	0	C/C(=C\CP(=O)(N[C@@H](C)C(=O)OCc1ccccc1)Oc1cccc2c1CCCC2)Cn1ccc(=O)[nH]c1=O
145961361	0	C/C(=C\CP(=O)(N[C@@H](C)C(=O)OCc1ccccc1)Oc1cccc2ccccc12)Cn1ccc(=O)[nH]c1=O
145956113	0	C/C(=C/CP(=O)(N[C@@H](C)C(=O)OC(C)C)Oc1cccc2c1CCCC2)Cn1ccc(=O)[nH]c1=O
145962249	0	C/C(=C\CP(=O)(N[C@@H](C)C(=O)OC(C)C)Oc1cccc2c1CCCC2)Cn1cc(C)c(=O)[nH]c1=O
145953010	0	COc1ccc(OC)c(C2NC(=O)N(Cc3cn(Cc4ccccc4)nn3)C(C)=C2C(C)=O)c1
137631405	0	C[C@H](NP(=O)(OCC(CCn1cnc2c(=O)[nH]c(N)nc21)COP(=O)(N[C@@H](C)C(=O)OCc1ccccc1)Oc1cccc2ccccc12)Oc1cccc2ccccc12)C(=O)OCc1ccccc1
137646467	0	C[C@H](NP(=O)(OCC(COP(=O)(N[C@@H](C)C(=O)OCc1ccccc1)Oc1ccccc1)SCn1cnc2c(=O)[nH]c(N)nc21)Oc1ccccc1)C(=O)OCc1ccccc1
135480717	0	Nc1nc2c(ncn2CSC(CO)CO)c(=O)[nH]1
137641771	0	CC(C)(NP(=O)(OCC(CO)OCn1cnc2c(=O)[nH]c(N)nc21)Oc1cccc2ccccc12)C(=O)OCc1ccccc1
137658728	0	CC(C)(NP(=O)(OCC(CO)CCn1cnc2c(=O)[nH]c(N)nc21)Oc1cccc2ccccc12)C(=O)OCc1ccccc1
137650554	0	CC(C)(NP(=O)(OCC(CO)CCn1cnc2c(=O)[nH]c(N)nc21)Oc1ccccc1)C(=O)OCc1ccccc1
137656172	0	CC(C)(NP(=O)(OCC(CCn1cnc2c(=O)[nH]c(N)nc21)COP(=O)(NC(C)(C)C(=O)OCc1ccccc1)Oc1cccc2ccccc12)Oc1cccc2ccccc12)C(=O)OCc1ccccc1
168271853	0	O=c1[nH]c(=O)n([C@@H]2CN[C@H](CO)[C@@H](O)C2)cc1I
25257203	0	CCC1(Cc2ccccc2)OS(=O)(=O)C=C1OCC=C(C)C
70681756	0	Nc1nc(OCc2ccccc2)c2ncn(/C=C3/CC3(CO)CO)c2n1
155568331	0	Cc1ccc(-c2cn3c(=O)c4ncn(CCC(CO)CO)c4nc3[nH]2)cc1
56668649	0	Nc1ncnc2c1ncn2CCOCP(=O)(O)OCCCCCCCCCCO
164624403	0	O=c1nc2c(cn1[C@H]1C=C[C@@H](O)C1)Oc1ccccc1N2
53322711	0	CC(C)CNC(=O)[C@H](C)NC(=O)[C@]1(Cc2ccccc2)CCN1C(=O)OCc1ccccc1
10086263	0	Nc1nc(NC2CC2)c2ncn(/C=C3/CC3(CO)CO)c2n1
155525804	0	COc1ccc(-c2cn3c(=O)c4ncn(CCC(CO)CO)c4nc3[nH]2)cc1
53318760	0	C[C@H](NC(=O)[C@]1(Cc2ccccc2)CCN1C(=O)OCc1ccccc1)C(=O)NC(C)(C)C
162643964	0	CC(=O)OC[C@H]1O[C@@H](n2cc3c(C#CCO)c(-c4ccc(C)cc4)oc3nc2=O)C[C@@H]1OC(C)=O
53318763	0	C[C@H](NC(=O)[C@]1(Cc2ccccc2)CCN1C(=O)OCc1ccc([N+](=O)[O-])cc1)C(N)=O
135967822	0	Nc1nc2ncn(/C=C3/[C@@H](CO)[C@H]3F)c2c(=O)[nH]1
56661756	0	CCOCCOCCOCCOCCOCCOCCOP(=O)(O)COCCn1cnc2c(N)ncnc21
472373	0	O=c1[nH]c(=O)n([C@@H]2CO[C@H](CO)[C@H]2CO)cc1I
155532787	0	O=c1c2ncn(CCC(CO)CO)c2nc2[nH]c(-c3ccc(Oc4ccccc4)cc3)cn12
135542260	0	Nc1nc2c(ncn2C[C@H](CF)OCP(=O)(O)O)c(=O)[nH]1
16078861	0	Nc1ccn(C/C=C\CCP(=O)(O)O)c(=O)n1
70690159	0	Nc1nc(NC2CCCC2)c2ncn(/C=C3/CC3(CO)CO)c2n1
135967824	0	Nc1nc2ncn(/C=C3\[C@H](F)[C@H]3CO)c2c(=O)[nH]1
16072394	0	Nc1ncnc2c1ncn2/C=C1\[C@H](F)[C@H]1CO
53320083	0	C[C@H](NC(=O)[C@@]1(Cc2ccccc2)CCN1C(=O)OCc1ccccc1)C(=O)NC(C)(C)C
70686006	0	Nc1nc(SCc2ccccc2)c2ncn(/C=C3/CC3(CO)CO)c2n1
70696460	0	CSc1nc(N)nc2c1ncn2/C=C1/CC1(CO)CO
70696461	0	CCCCCCCCSc1nc(N)nc2c1ncn2/C=C1/CC1(CO)CO
70694378	0	Nc1nc(NCc2ccccc2)c2ncn(/C=C3/CC3(CO)CO)c2n1
70686004	0	CC(C)Sc1nc(N)nc2c1ncn2/C=C1/CC1(CO)CO
66561486	0	CCCCCOc1nc(N)nc2c1ncn2/C=C1/CC1(CO)CO
71508385	0	Nc1ncc(I)c2c1ncn2[C@@H]1C[C@H](O)[C@@H](O)[C@H]1O
56665190	0	Nc1ncnc2c1ncn2CCOCP(=O)(OCCCCCCCCC(O)CO)OCCCCCCCCC(O)CO
135480763	0	Nc1nc2c(ncn2OC[C@@H](O)CO)c(=O)[nH]1
136177299	0	COc1cc(/C=C(/O)C(F)(F)F)nc(OC)n1
16732726	0	CC(O)(CF)Cc1cc(=O)[nH]c(=O)[nH]1
70853392	0	O=c1nc2c(cn1COCCO)Oc1ccccc1N2
145980265	0	C#C[C@@]1(O)[C@@H](CO)O[C@@H](n2ccc3c(Cl)ccnc32)[C@@H]1O
155519569	0	O=c1c2ncn(CCC(CO)CO)c2nc2[nH]c(-c3ccc(Cl)cc3)cn12
155524571	0	O=c1c2ncn(CCC(CO)CO)c2nc2[nH]c(-c3ccccc3)cn12
155558753	0	CCOc1ccc(-c2cn3c(=O)c4ncn(CCC(CO)CO)c4nc3[nH]2)cc1
155521687	0	O=c1c2ncn(CCC(CO)CO)c2nc2[nH]c(-c3ccc(F)cc3)cn12
155549138	0	COc1ccc(-c2cn(C/C=C3\OC(=O)C(OCc4ccccc4)=C3OCc3ccccc3)nn2)cc1
155562051	0	O=C1O[C@H]([C@@H](O)Cn2cc(C3CC3)nn2)C(OCc2ccccc2)=C1OCc1ccccc1
137641700	0	COP(=O)(O)COCCn1cnc(N)nc1=O
137647717	0	CCOP(=O)(OCC)[C@@H]1C[C@@H](Cn2c(=O)n(Cc3cccc(F)c3)c(=O)c3ccccc32)ON1C
137637476	0	CCOP(=O)(OCC)C1CC(Cn2c(=O)n(Cc3ccccc3)c(=O)c3ccccc32)ON1C
137652337	0	CCOP(=O)(OCC)[C@H]1C[C@@H](Cn2c(=O)n(Cc3ccccc3F)c(=O)c3ccccc32)ON1C
137660148	0	CSc1nc(-c2ccccc2)c(C#N)c(N2CCN(c3ccnc4cc(Cl)ccc34)CC2)n1
137641607	0	CSc1nc(-c2ccc([N+](=O)[O-])cc2)c(C#N)c(N2CCN(c3ccnc4cc(Cl)ccc34)CC2)n1
137637070	0	CCOC(=O)[C@H](Cc1ccccc1)NP(=O)(O)COCCn1cnc(N)nc1=O
145963264	0	C/C(=C\CP(=O)(N[C@@H](C)C(=O)OC(C)C)Oc1ccccc1)Cn1ccc(=O)[nH]c1=O
145952865	0	C/C(=C\CP(=O)(N[C@@H](C)C(=O)OCc1ccccc1)Oc1ccccc1)Cn1ccc(=O)[nH]c1=O
156018561	0	CCCCCOC(=O)[C@@H](NP(=O)(CO[C@@H](C)COc1nccc(N)n1)Oc1ccccc1)C(C)C
156017091	0	CCCCCOC(=O)[C@@H](NP1(=O)CO[C@H](COc2ncc(F)c(N)n2)CO1)C(C)C
156016016	0	CCCCCOC(=O)[C@@H](NP(=O)(CO[C@H](C)COc1nccc(N)n1)Oc1ccccc1)C(C)C
164623503	0	COc1ccc(C(OCCOCn2cc3c(nc2=O)Nc2ccccc2O3)(c2ccccc2)c2ccc(OC)cc2)cc1
162661207	0	CO[C@]1(COP(=O)(N[C@@H](C)C(=O)OCc2ccccc2)Oc2ccccc2)O[C@@H](n2ccc(N)nc2=O)C(F)(F)[C@@H]1O
162650339	0	CC(=O)OCC#Cc1c(-c2ccc(C)cc2)oc2nc(=O)n([C@H]3C[C@H](OC(C)=O)[C@@H](COC(C)=O)O3)cc12
164623124	0	CCCCCCCCCOc1ccc2c(c1)Nc1nc(=O)n(COCCO)cc1O2
164626042	0	CC(=O)OCCOCN1C=C(Br)C(O)NC1=O
162647033	0	CO[C@]1(CO)O[C@@H](n2ccc(=O)[nH]c2=O)C(F)(F)[C@@H]1O
164626347	0	CN1c2ccccc2Oc2cn(COCCO)c(=O)nc21
162668522	0	CO[C@]1(CO)O[C@@H](n2ccc(N)nc2=O)C(F)(F)[C@@H]1O
156013421	0	CCCCCOC(=O)[C@@H](NP(=O)(CO[C@H](C)COc1ncc(F)c(N)n1)Oc1ccccc1)C(C)C
156022189	0	CCCCCOC(=O)[C@@H](NP1(=O)CO[C@@H](COc2ncc(F)c(N)n2)CO1)C(C)C
156012412	0	CCCCOC(=O)[C@@H](NP(=O)(COC(C)COc1nccc(N)n1)Oc1ccccc1)C(C)C
156014501	0	CCCCCOC(=O)[C@@H](NP1(=O)CO[C@@H](COc2nccc(N)n2)CO1)C(C)C
134382682	0	Nc1ccnc(OC[C@@H](CF)OCP(=O)(O)O)n1
156014477	0	CCCCCOC(=O)[C@@H](NP(=O)(CO[C@@H](C)COc1ncc(F)c(N)n1)Oc1ccccc1)C(C)C
156018828	0	CCCCCOC(=O)[C@@H](NP(=O)(CO[C@H](CF)COc1ncc(F)c(N)n1)Oc1ccccc1)C(C)C
137638819	0	CCOP(=O)(OCC)[C@@H]1C[C@@H](Cn2ccc(=O)n(C(=O)c3ccccc3)c2=O)ON1C
145970273	0	C[C@H](NP(=O)(C/C=C/Cn1cc(F)c(=O)[nH]c1=O)Oc1ccccc1)C(=O)OCc1ccccc1
16732729	0	CC(O)(Cc1cc(=O)[nH]c(=O)[nH]1)C(F)(F)F
137028557	0	Nc1nc2c(ncn2C[Se]CCO)c(=O)[nH]1
135967821	0	Nc1nc2ncn(/C=C3/[C@@H](F)[C@H]3CO)c2c(=O)[nH]1
135967823	0	Nc1nc2ncn(/C=C3/[C@@H](F)[C@@H]3CO)c2c(=O)[nH]1
46231997	0	CCn1c(C)cc2c(c1=O)C(c1cn([C@H]3C[C@H](OC(C)=O)[C@@H](COC(C)=O)O3)c(=O)[nH]c1=O)C(C#N)=C(N)O2
16732889	0	COc1cc(CC(O)(c2ccc(F)cc2)c2ccc(F)cc2)nc(OC)n1
16732885	0	CC(=O)OC(C)(Cc1cc(=O)[nH]c(=O)[nH]1)Cc1ccccc1F
16732734	0	COc1cc(CC(C)(O)c2ccc(F)cc2)nc(OC)n1
16732728	0	COc1cc(CC(C)(O)C(F)(F)F)nc(OC)n1
135610881	0	COc1cc(/C=C(\O)C(F)(F)C(F)(F)F)nc(OC)n1
16732735	0	COc1cc(CC(C)(O)Cc2ccccc2F)nc(OC)n1
16732727	0	CC(=O)OC(C)(CF)Cc1cc(=O)[nH]c(=O)[nH]1
16732575	0	COc1nc(CBr)c(Br)c(OC)n1
16732577	0	COc1cc(CC(C)(O)CF)nc(OC)n1
46231996	0	CC(=O)OC[C@H]1O[C@@H](n2cc(C3C(C#N)=C(N)Oc4cc(C)[nH]c(=O)c43)c(=O)[nH]c2=O)C[C@@H]1OC(C)=O
54728122	0	CC(=O)OC[C@H]1O[C@@H](n2cc(C(c3c(O)cc(C)[nH]c3=O)c3c(O)cc(C)[nH]c3=O)c(=O)[nH]c2=O)C[C@@H]1OC(C)=O
46231929	0	CC(=O)OC[C@H]1O[C@@H](n2cc(C3C(C#N)=C(N)Oc4cc(C)n(C)c(=O)c43)c(=O)[nH]c2=O)C[C@@H]1OC(C)=O
122180138	0	CCOP(=O)(OCC)[C@@H]1C[C@@H](C(=O)Nc2cc3c4c(cccc4c2)C(=O)N(CC(C)C)C3=O)ON1C
71451094	0	CC(C)c1ccc(Nc2nc(N)nc3c2ncn3C/C=C/CP(=O)(OCOC(=O)C(C)(C)C)OCOC(=O)C(C)(C)C)cc1
136244491	0	COc1ccc(/C=C/c2nc(N)[nH]c(=O)c2Br)cc1OC
136244581	0	Nc1nc(CC(O)c2ccccc2C(F)(F)F)c(Br)c(=O)[nH]1
136260456	0	Nc1nc(CC(O)c2ccc(Cl)cc2)c(Br)c(=O)[nH]1
136239353	0	Nc1nc(CCc2ccccc2)c(Br)c(=O)[nH]1
135480617	0	CCCc1nc(N)[nH]c(=O)c1Br
53363994	0	CCCCCCCC(=O)NCC#Cc1cn([C@H]2C[C@H](O)[C@@H](CO)O2)c(=O)[nH]c1=O
122192827	0	O=C(Cn1c(=O)ccn(CCCCCOc2ccccc2)c1=O)Nc1ccc(Oc2ccccc2)cc1
71454686	0	C=CCNc1ncnc2c1ncn2C/C=C/CP(=O)(OCOC(=O)C(C)(C)C)OCOC(=O)C(C)(C)C
122192829	0	O=C(Cn1c(=O)ccn(CCCCCOc2cccc(Br)c2)c1=O)Nc1ccc(Oc2ccccc2)cc1
122192830	0	N#Cc1ccc(OCCCCCn2ccc(=O)n(CC(=O)Nc3ccc(Oc4ccccc4)cc3)c2=O)cc1
122192840	0	O=C(Cn1c(=O)ccn(CCCCCOc2ccc(Br)cc2)c1=O)Nc1ccc(C(=O)c2ccccc2)cc1
122192843	0	O=C(Cn1c(=O)ccn(COCCOCc2ccc(Br)cc2)c1=O)Nc1ccc(Oc2ccccc2)cc1
122192836	0	O=C(Cn1c(=O)c(I)cn(CCCCCOc2ccc(Br)cc2)c1=O)Nc1ccc(Oc2ccccc2)cc1
122192842	0	O=C(Cn1c(=O)ccn(CCCCOCc2ccc(Br)cc2)c1=O)Nc1ccc(Oc2ccccc2)cc1
122192841	0	O=C(Cn1c(=O)ccn(CCCCCCc2ccccc2)c1=O)Nc1ccc(Oc2ccccc2)cc1
137028558	0	Nc1nc2c(ncn2C[Se]C(CO)CO)c(=O)[nH]1
71456419	0	CCCCNc1ncnc2c1ncn2C/C=C/CP(=O)(OCOC(=O)C(C)(C)C)OCOC(=O)C(C)(C)C
70681755	0	CCOc1nc(N)nc2c1ncn2/C=C1/CC1(CO)CO
60167323	0	Nc1ccc(C#CC#Cc2cn([C@H]3C[C@H](O)[C@@H](CO)O3)c(=O)[nH]c2=O)cc1
60167465	0	O=c1[nH]c(=O)n([C@H]2C[C@H](O)[C@@H](CO)O2)cc1C#CC#CC1CC1
60167322	0	Nc1cccc(C#CC#Cc2cn([C@H]3C[C@H](O)[C@@H](CO)O3)c(=O)[nH]c2=O)c1
70683866	0	CCCCCCCCOc1nc(N)nc2c1ncn2/C=C1/CC1(CO)CO
66561485	0	CCCCOc1nc(N)nc2c1ncn2/C=C1/CC1(CO)CO
168297977	0	Cl.Cl.[O-][n+]1onc2ncnc(N3CC[N+]4(CC3)CC[N+]3(CCN(c5ncnc6no[n+]([O-])c56)CC3)CC4)c21

## Sheet: 5. EBV
Bioactivity dataset 5. EBV
cid	Activity	Canonical_smiles
5702697	1	CCN1/C(=C/C=C/C=C/c2sc3ccccc3[n+]2CC)Sc2ccccc21.[I-]
4294204	1	Cc1ccc(NC(=S)NC(=O)c2ccc(F)cc2)cc1S(=O)(=O)Nc1ccccc1Cl
3185712	1	Cc1ccccc1N(C(=O)c1snc(C(N)=O)c1N)C(C(=O)NCC1CCCO1)c1ccc(N(C)C)cc1
135459016	1	CCOc1cc(/C=N/NC(=O)C(=O)N/N=C/c2ccc(O)c(OCC)c2)ccc1O
3532333	1	O=C(CCn1c(=S)[nH]c2ccccc2c1=O)Nc1cccc(Cl)c1
3888169	1	Cc1[nH]n(C(N)=S)c(=O)c1N=Nc1ccc(Cl)cc1Cl
16830460	1	CN1CCN(c2ccc(-c3cccc(NC(=O)COc4ccc(Cl)cc4Cl)c3)nn2)CC1
3921421	1	Cc1cc(C)nc(OC(C(=O)O)C(OCCc2ccccc2)(c2ccccc2)c2ccccc2)n1
135400566	1	Cc1cc(C)n(/N=C/c2c[nH]c3ccccc23)c(=O)c1C#N
1314610	1	N#Cc1nc(-c2ccc(Cl)cc2)oc1NCc1cccc2c1OCO2
2514549	1	C=CCn1c(SCC(=O)NC(=O)NCc2ccco2)nc2sc(CC)cc2c1=O
2318631	1	CCOC(=O)c1cc2cc(CC(=O)c3ccc(OCC)cc3O)ccc2o1
9551225	1	COC(=O)c1cc(NC(=O)C2CCCN(S(=O)(=O)c3c(C)n[nH]c3C)C2)cc(C(=O)OC)c1
4434008	1	CCc1ccccc1N(C)S(=O)(=O)c1ccc2[nH]cc(C(=O)N3CCc4ccccc43)c(=O)c2c1
665752	1	COc1ccc(CCNC(=O)c2sc(=S)n(C)c2N)cc1
24793586	1	COc1ccc(-c2cn(Cc3ccc(C(=O)c4ccccc4)cc3)nn2)cc1
2933898	1	COC(=O)C1=C(C)NC2=C(C(=O)c3ccccc32)C1c1cccc(OC)c1
1363089	1	Cc1ccc2oc(-c3cccc(NC(=O)/C=C/c4cccc([N+](=O)[O-])c4)c3C)nc2c1
135550889	1	Cc1ccc(O)c(/C=N/NC(=O)COc2ccc3c(C)cc(=O)oc3c2)c1
2491877	1	CCn1c(SCC(=O)NC(=O)NCc2ccco2)nc2sc(C)c(C)c2c1=O
20923581	1	Cc1cccc(C)c1NC(=O)Cn1nnc(C(=O)Nc2ccc(F)cc2F)c1N
3139998	1	CN1C(=O)CC(C(=O)Nc2ccccc2F)SC1=Nc1ccc2c(c1)OCO2
5339079	1	Cc1nc(-c2ccccc2)nc2[nH]c(-c3ccccc3)cc(=O)c12
22519160	1	Cc1cccc(NC(=O)c2cc(S(=O)(=O)N3CCc4ccccc43)cn2C)c1C
3237822	1	Cc1ccccc1OCc1nc(-c2ccc(NC(=O)c3ccc4c(c3)OCO4)cc2)no1
2827888	1	Cc1cc(C)nc(NC(=O)NS(=O)(=O)Nc2ccc(Br)cn2)n1
2944641	1	COc1cc2c(cc1NC(=O)CSc1ccccc1)oc1ccccc12
2478762	1	Cc1c(C(=O)OCC(=O)Nc2ccc(S(N)(=O)=O)cc2)oc2c1ccc1ccccc12
15945026	1	COc1ccc(C2=[N+](C)CCn3cccc32)c(OC)c1.[I-]
662403	1	O=S(=O)(NCCSc1ccc(Cl)cc1)c1ccc2c(c1)OCCO2
135403797	1	O=c1c(O)cccc2cc(O)c(O)c(O)c12
5824722	1	Cc1ccc(S(=O)(=O)/N=C2\C=C(Nc3cccc(C(=O)O)c3)C(=O)c3ccccc32)cc1
2898241	1	Cc1cc2c(cc1C)C(c1ccccc1Br)CC(=O)N2
166804	1	CN(C)C(=O)CCCCCCCCC(=O)N(C)C
6145649	1	N#Cc1nc(/C=C/c2ccccc2)oc1NCCCN1CCOCC1
4411622	1	CCOC(=O)NN1C(=O)c2ccccc2NC1c1ccc(N(C)C)cc1
646707	1	O=C(Cn1nnc(-c2ccccc2NC(=O)c2cccs2)n1)Nc1ccccc1
1231130	1	Cc1cc(/C=C2\C(=O)NC(=O)N(c3ccccc3F)C2=O)c(C)n1-c1cc(C(=O)O)cc(C(=O)O)c1
16682613	1	NC1=NC[C@H](c2ccccc2)N1CCCCC1CCCCC1
6602954	1	COc1ccc(OC)c(N)c1.Cl
2997571	1	Cn1c(=O)c2c(ncn2CC(=O)Nc2nc(-c3ccccc3Cl)cs2)n(C)c1=O
5752755	1	O=c1/c(=C\c2cc([N+](=O)[O-])cc([N+](=O)[O-])c2O)sc2nc3ccccc3n12
3214708	1	CC(=O)Nc1ccc(S(=O)(=O)N2CCN(Cc3nc4sc(C)c(C)c4c(=O)[nH]3)CC2)cc1
2931962	1	CCC(C)NC(=O)c1ccc([N+](=O)[O-])c(Cl)c1
16759461	1	CC1(OC(=O)c2cnc3ccccc3n2)C(=O)C=C2C=C(C3CC3)OC=C2C1=O
651286	1	Cc1ccc(C(=O)CSc2nc(C)cc(SCc3nnc(-c4ccccc4)o3)n2)cc1
4649066	1	O=C(NCCc1c[nH]c2ccccc12)C1CCC(Cn2c(=S)[nH]c3ccccc3c2=O)CC1
1004321	1	COc1ccc(-c2ccc(C#N)c(SCC(=O)NCCc3ccccc3)n2)cc1OC
2932177	1	CCOc1ccc(C(=O)NCCCCNC(=O)c2ccc(OCC)cc2)cc1
3239326	1	COc1cccc(Cn2c(=S)[nH]c3ccc(N4CCOCC4)cc3c2=O)c1
2092666	1	CC(C)Cn1c(N)c(C(=O)COC(=O)c2ccc3c(c2)OCCO3)c(=O)n(C)c1=O
24747683	1	Cc1nc(Nc2cccc(Cl)c2)c2oc3ccccc3c2n1.Cl
3781553	1	C=CCNC(=S)Nc1c(C(=O)OC)[nH]c2cc(OC)ccc12
651208	1	Cc1cc(N)ccc1-n1c(C)ccc1C
2166682	1	COc1ccc2nc(NC(=O)CSc3nnc(C)s3)sc2c1
2112987	1	CCCN(CC(=O)Nc1ccc(C(N)=O)cc1)CC(=O)Nc1ccc(Cl)cc1Cl
5718631	1	CCN1/C(=C/C=C/c2oc3ccc4ccccc4c3[n+]2CC)Oc2ccc3ccccc3c21.Cc1ccc(S(=O)(=O)[O-])cc1
9548166	1	COC(=O)[C@H](Cc1ccccc1)NC(=O)O[C@H]1C(=O)c2ccc(OC)cc2O[C@@H]1c1ccc2c(c1)OCO2
3158412	1	COC(=O)C1=CN(Cc2ccc(OC)cc2)C=C(C(=O)OC)C1c1ccc(O)c(OC)c1
4575822	1	CCCCCNC(=O)c1c[nH]c2ccc(S(=O)(=O)N3CCC4(CC3)OCCO4)cc2c1=O
6220215	1	CC1=Nc2ccc(C)cc2/C1=C/c1c(N)n2oc(C)cc2nc1=O
2939231	1	N=Cc1c(O)n(-c2ccc(C34CC5CC(CC(C5)C3)C4)cc2)c(=O)[nH]c1=O
5350505	1	Nc1nnnn1/N=C/c1ccccc1OCc1ccccc1
12006043	1	Cc1cccc(NC(=O)CSc2ccc(-c3cccs3)nn2)c1C
4192032	1	C=CCn1c(=NC(=O)c2cc(-c3cccs3)nc3ccccc23)sc2cc(S(N)(=O)=O)ccc21
1095341	1	COc1ccc(Nc2nc(Cl)nc(NCc3ccco3)n2)c(OC)c1
1919699	1	Cc1ccc(/C=C2\SC(=S)N(CCC(=O)NNC(=O)c3ccc(O)cc3)C2=O)cc1
1977761	1	COc1ccc(C([O-])=Nc2ccc[n+](-c3nc4ccccc4nc3NS(=O)(=O)c3ccccc3)c2)cc1
2348253	1	O=C(COC(=O)c1ccc(CSc2ccc(Cl)cc2)cc1)Nc1ccccc1
6877457	1	COc1ccc(/C=C/C(=O)Oc2cccc(/C=N/NC(=O)c3cccc(F)c3)c2)cc1
2177684	1	CCC(=O)c1ccc(N2CCN(C(=O)COc3ccc(F)cc3)CC2)c(F)c1
2738836	1	O=C(NCc1csc(-c2cccs2)n1)Nc1cccc(Cl)c1
3231085	1	Cc1ccc2nc(-c3cccnc3SCC(=O)N3c4ccccc4CC3C)[nH]c2c1
1107365	1	O=C(Nc1ccc(Oc2ccc3c(c2)C(=O)N(c2ccc(O)cc2)C3=O)cc1)c1cccs1
1073207	1	COc1ccc(-n2nnnc2SCC(=O)c2ccc3c(c2)OCCO3)cc1
809243	1	O=C(COc1ccc2ccccc2c1)NNC(=O)Cc1ccccc1
1389133	1	COc1ccc(CNc2nc3c(c(=O)[nH]c(=O)n3C)n2Cc2ccccc2)cc1
3979258	1	CCCC(=O)N(Cc1cc(=O)[nH]c2ccccc12)c1ccccc1OC
1120548	1	CCOc1ccccc1N(CC(=O)Nc1ccc(OC)cc1)S(=O)(=O)c1ccccc1
652442	1	O=C(Nc1ccc(F)cc1)N(Cc1ccco1)Cc1cc2cc3c(cc2[nH]c1=O)OCO3
666779	1	COc1ccccc1CN1C(=O)[C@@H]2C(CC(N)=O)NC3(C(=O)Nc4c3ccc(Cl)c4C)[C@@H]2C1=O
15998034	1	COc1ccc(-n2nc(C(=O)NCC(=O)NCc3cccc(F)c3)c3ccccc3c2=O)cc1Cl
2411948	1	CCOC(=O)c1c(-c2ccc(C)o2)csc1NC(=S)NC(=O)c1ccc(F)cc1
135448748	1	CCn1c(O)c(/C=C2\C=Nc3ccccc32)sc1=O
1254657	1	O=C(NCc1ccc(-c2nc3ccccc3s2)cc1)c1cc2ccccc2o1
135609369	1	O=C(CCC(=O)Nc1ccc(Br)cc1)N/N=C/c1ccc(O)cc1
4337954	1	COc1ccc(NS(=O)(=O)c2ccc(O)c(NC(=O)c3ccc(S(=O)(=O)N4CCCCCC4)cc3)c2)cc1
24791945	1	COc1ccc(NC(=O)c2ccc3c(c2)CCN3S(=O)(=O)c2ccccc2)c(OC)c1
1202753	1	O=C(Nc1cccc(NC(=O)c2ccc(F)cc2)c1)c1ccc(F)cc1
1548055	1	O=C(Nc1cccc(NC(=O)c2ccc(Br)cc2)c1)c1ccccc1
1566250	1	CC(/C=C1\SC(=O)N(CC(=O)Nc2ccc(O)cc2)C1=O)=C\c1ccccc1
1320559	1	Cc1cc(CSc2ccccc2)ccc1NC(=O)c1cccc([N+](=O)[O-])c1
3216085	1	Cc1cnc(C(=O)Nc2ccc(S(=O)(=O)N(C(C)C)C(C)C)cc2)cn1
3303874	1	O=C(CC(C(=O)O)c1ccc(Cl)cc1Cl)c1ccc(Cl)cc1
3881108	1	O=C(Nc1cc(S(=O)(=O)N2CCOCC2)ccc1N1CCOCC1)c1ccc(Cl)nc1
2240902	1	COc1ccc(S(=O)(=O)Nc2cccc(C)n2)c2ccccc12
5760061	1	COc1cc(/C=C/c2[nH]c(=O)[nH]c(=O)c2[N+](=O)[O-])cc([N+](=O)[O-])c1O
2215308	1	C=CCOc1c(Cl)cc(CNc2ccc(N(C)C)cc2)cc1OC
2815701	1	Cc1ccc(S(=O)(=O)NC(=O)Nc2ccc(N(C)C)cc2)cc1
307157	1	CN(C)c1ccc(C=Nc2ccc(N(C)C)cc2)cc1
6099	1	CN(C)c1ccc2nc3ccc(=[N+](C)C)cc-3sc2c1.[Cl-]
2877674	1	O=C(Nc1cccc(-c2cn3ccccc3n2)c1)c1cc2ccccc2oc1=O
22514522	1	CCc1nn(CC(=O)N2CCN(C)CC2)c(=O)c2cccn12
1712296	1	O=C(O)/C(=C\c1ccc2ccccc2c1)c1cccc2ccccc12
3828328	1	CCN(CC)c1ccc(N=Cc2c(O)n(-c3ccc(OC)cc3)c(=O)[nH]c2=O)cc1
4142827	1	CC(=O)NC(CCS(C)(=O)=O)C(=O)Nc1ccc(Cl)c(Cl)c1
9551283	1	CCOc1cc(/C=C2/C(=O)ON=C2C)ccc1OCc1ccc(F)cc1
135517150	1	CCCCC(=O)N/N=C/c1c(O)n(CC)c(=S)[nH]c1=O
24978571	1	C#CCOCCOCCOCCNc1nc(N2CCN(C(=O)CCCCCCCCCCNC(=O)[C@H](CCCCN)n3cc(CCO)nn3)CC2)nc(N2CCN(C(=O)CCCCCCCCCCNC(=O)[C@H](CCCN=C(N)N)n3cc(C[C@@H](C)CC)nn3)CC2)n1
739576	1	Cc1cc(=O)oc(C)c1C(=O)OCC(=O)c1ccc(Cl)cc1
5310132	1	COc1ccc(-n2nnc3c(=O)n(CC(=O)N4CCCc5ccccc54)cnc32)cc1
271296	1	CC1=CC(=O)c2c(O)ccc(O)c2C1=O
8024088	1	CC1CCN(C(=O)COC(=O)c2n[nH]c(=O)c3ccccc23)CC1
4080346	1	CC(C(=O)OCC(=O)c1ccc(Br)cc1)N1C(=O)C2C3C=CC(C3)C2C1=O
2091677	1	CCOC(=O)c1c(NC(=O)Cn2nc(C(=O)O)c3ccccc3c2=O)sc(CC)c1C
2320287	1	CC(C)c1ccc(NC(=O)COc2ccc(S(=O)(=O)N3CCOCC3)cc2)cc1
2321749	1	CN(C)c1ccc(N=Cc2cccn2C)cc1
2187659	1	CN(C)c1ccc(N/C=C/C(=O)C(C)(C)C)cc1
1017323	1	CCOc1cc(CNc2ccc(N(C)C)cc2)cc(Br)c1OCC(=O)NC(C)(C)C
794739	1	CCN(CC)c1ccc(C=Nc2ccc(N(C)C)cc2)c(O)c1
2783649	1	CC1=[N+](C)c2ccc3ccccc3c2C1(C)C
794172	1	CCN(CC)c1ccc(N=Cc2ccccc2[N+](=O)[O-])cc1
16875665	1	CCN(CC)c1ccc2nc3ccccc3[n+](CC)c2c1.[I-]
2828403	1	CCCCOP(=O)(OCCCC)/C(C#N)=C(/C)O
5458171	1	Cl.O=C1c2c(O)ccc(O)c2C(=O)c2c(NCCNCCO)ccc(NCCNCCO)c21
16192643	1	Cl.Nc1ccc(N(CCO)CCO)cc1
895662	1	CN(C)c1ccc(NC(=O)Oc2ccccc2)cc1
3241163	1	CC1=C(C#N)C(=O)N(C)C(=O)C1=Nc1ccc(N(C)C)cc1
9916275	1	CCN(CC)c1ccc2c(-c3ccc(S(=O)(=O)[O-])cc3S(=O)(=O)[O-])c3ccc(=[N+](CC)CC)cc-3oc2c1.[Na+]
604063	1	CC1=NN(c2ccccc2)C(=O)C1C=Nc1ccc(N(C)C)cc1
25102590	1	Cl.NCCC1CCCC(CCN)N1
9549472	1	CN1/C(=C\C=C\C2=[N+](C)c3ccc4ccccc4c3C2(C)C)C(C)(C)c2ccccc21.[O-][Cl+3]([O-])([O-])[O-]
2315873	1	CN(C)c1ccc(N2CN=C3SCC(=O)N3C2)cc1
1711910	1	CN(C)c1ccc(N/C=C/C(=O)C(F)(F)F)cc1
70371	1	Cc1c(C=O)c(=O)n(-c2ccccc2)n1C
3239318	1	CC1=C(C#N)C(=O)N(CCCO)C(=O)C1=Nc1ccc(N(C)C)cc1
672376	1	CC1=C(C#N)C(=O)N(CCO)C(=O)C1=Nc1ccc(N(C)C)cc1
781700	1	Cc1ccc(C=Nc2ccc(N(C)C)cc2)o1
781698	1	CN(C)c1ccc(N=Cc2ccco2)cc1
95168	1	CC(C)=CCc1c2c(c3occ(-c4ccc(O)cc4)c(=O)c3c1O)C=CC(C)(C)O2
1216341	1	Cc1ccc2nnnc(-c3ccccc3)c2c1
5281767	1	COc1cc(/C=C/C(=O)/C=C(O)/C=C/c2ccc(O)c(OC)c2)ccc1O
2220997	1	Cc1ccc(-c2cc(C(=O)NCCCN3CCOCC3)c3ccc(Cl)c(C)c3n2)cc1
1228857	1	O=C1Nc2ccc(Br)cc2/C1=C/c1ccc(C(=O)O)cc1
16189029	1	CCOC(=O)C1(CC2CC2)CCN(C(=O)c2cc(OC)nc3ccccc23)CC1
24791314	1	COc1ccc(C(=O)N(C)CCCC2CCCC2)cc1OC1CCN(C(C)C)CC1
720233	1	O=c1c(Cl)c(Cl)cnn1Cc1ccccc1Cl
6874331	1	COc1cc(/C=N/NC(N)=S)ccc1OCC(=O)Nc1ccc(C)cc1
2964886	1	O=C(CCCCCN1C(=O)CCC1=O)Nc1ccc2c(c1)OCCO2
2123444	1	CCn1c(CSc2n[nH]c(N)n2)nc2cc(C(=O)O)ccc21
714733	1	Cc1cccc(C)c1NC(=S)NCCc1ccccn1
16191792	1	CCOC(=O)C1(Cc2ccccc2)CCN(Cc2cccn2-c2nccs2)CC1
5766620	1	CN1C(=O)/C(=C/c2ccco2)SC1=Nc1cccc(C(=O)O)c1
1489267	1	COc1ccc(Cn2c(SCc3ccc(C)cc3)nc3cc(OC)c(OC)cc3c2=N)cc1Cl
135504379	1	Cc1ccc(S(=O)(=O)/N=C2/NC(=O)/C(=C/c3cc([N+](=O)[O-])ccc3O)S2)cc1
16682542	1	CCO.Nc1nc(N)c2cc(Sc3ccc4ccccc4c3)ccc2n1
2007472	1	COc1ccc(NC(=O)CSc2nc3sc4c(c3c(=O)n2-c2ccc(OC)cc2)CCN(C)C4)cc1
1947033	1	Cc1ccc(NC(=O)CSCC#N)cc1
24761368	1	CCOC(=O)c1c(CSc2ccc(CC)cc2)oc2ccc(O)c(CN(C)C)c12.Cl
2838487	1	CCOC(=O)C1CCCCN1Cc1ccc(OC)c(OC)c1
1457777	1	O=C(Nn1c(C2CCC2)nc2ccccc2c1=O)c1cccs1
1913403	1	CCC(=O)Nc1ccc(Nc2nc(Cl)nc(Nc3ccc(NC(=O)CC)cc3)n2)cc1
16745536	1	COc1cc([C@@H]2c3cc4c(cc3[C@@H](O)[C@@H](CO)[C@@H]2CO)OCO4)cc(OC)c1O[Si](C)(C)C(C)(C)C
1906043	1	CN1C(=O)/C(=C/C=C/c2ccco2)C(=O)NC1=S
3751094	1	CCN(CC)c1ccc(N=Cc2c(O)n(-c3cc(OC)ccc3OC)c(=O)[nH]c2=O)cc1
1613877	1	O=C(O)c1ccc(-c2ccc(/C=c3/sc4nc5ccccc5n4c3=O)o2)cc1Cl
24747730	1	CCCCCCCCCC[N+](C)(C)CC/C=C1/c2ccccc2Sc2ccc(Cl)cc21.[Br-]
1918388	1	O=C1NC(=O)N(Cc2ccco2)C(=O)/C1=C/C=C/c1ccco1
1996373	1	COc1ccc(Cn2c(N)c(S(=O)(=O)c3cccs3)c3nc4ccccc4nc32)cc1
11948794	1	COc1cc(CNCCc2c[nH]c3ccccc23)ccc1OCc1ccc(F)cc1.Cl
5322407	1	COc1ccc(NS(=O)(=O)c2ccc3c(c2)[C@H]2C=CC[C@H]2[C@@H](c2ccc(C(=O)O)cc2)N3)cc1
666868	1	CCOC(=O)c1ccc(NC(=O)CCc2nc(-c3ccc(C)cc3)no2)cc1
22829045	1	COc1ccc(S(=O)(=O)/N=C2\C=C(Nc3ccc(O)cc3)C(=O)c3ccccc32)cc1
5458165	1	NC(=O)c1cc[n+](CC2=C(C(=O)[O-])N3C(=O)[C@@H](NC(=O)C(c4ccccc4)S(=O)(=O)[O-])[C@H]3SC2)cc1.[Na+]
1149305	1	Cc1ccccc1OCc1nnc(SCC(=O)NCc2ccco2)n1C
4085011	1	O=c1[nH]c2ccccc2c(=O)n1-c1ccc(Cl)cc1Cl
2831623	1	CCNc1c([N+](=O)[O-])c(=O)oc2ccccc12
16195500	1	N=C1/C(=C/c2ccc(-c3cccc(C(=O)O)c3)o2)C(=O)N=C2SC=C(c3ccccc3)N12
11102	1	CCCCCCCCCCCCCCCC[N+](C)(C)CCN(Cc1ccc(OC)cc1)c1ncccn1.[Br-]
4235926	1	COc1ccc(C2=NN(C(C#N)c3ccc(OC)cc3)C(c3ccccc3)C2)cc1
4071864	1	CCC(=O)Nc1nc2ccc3sc(C)nc3c2s1
24817473	1	COCC1CCCCN1C(=O)c1ccc2nc(Cc3ccc(OC)c(OC)c3)oc2c1
16681957	1	C/C=C\C=C\C(=O)N1CC2(CC(c3cccc(NC(=O)CC)c3)=NO2)C[C@H]1C(N)=O
1309824	1	Cc1nn(CC(=O)Nc2ccc(C(=O)N3CCCCC3)cc2)c(=O)c2ccccc12
2707016	1	NC(=O)c1ccc(NC(=O)CSc2nnc(-c3ccc4c(c3)OCO4)o2)cc1
348130	1	COc1cc(O)c2c(c1)OC(c1ccc(O)cc1)CC2=O
1349228	1	Cc1ccc(OCC(=O)NC(=S)Nc2cccc(NC(=O)c3ccccc3)c2)cc1
1992940	1	Nc1nc(SCc2ccc(Cl)cc2Cl)nc2nc3c(cc12)CCCC3
2873940	1	CCOc1ccc2nc(SC3CC(=O)N(c4ccccc4)C3=O)sc2c1
20846819	1	COc1ccc(/C=N/NC(=O)c2ccc(Br)cc2)cc1Cn1cc(Cl)cn1
708625	1	COc1ccccc1C(=O)Nc1nc2ccccc2s1
24983186	1	COc1ccc(NC(=O)CN(C)C(=O)c2cc(-c3ccc(OC)cc3)nc3ccccc23)cc1
6115882	1	O=C1/C(=C\c2ccc(O)cc2)SC(=S)N1c1cccnc1
839472	1	CCc1nccn1S(=O)(=O)c1cccc([N+](=O)[O-])c1
2350093	1	Cc1c(NC(=O)COC(=O)c2cc(-c3ccc(-c4ccccc4)cc3)nc3ccccc23)c(=O)n(-c2ccccc2)n1C
5064912	1	C=CCn1c(=NC(=O)C2COc3ccccc3O2)sc2cc(S(N)(=O)=O)ccc21
711110	1	O=c1c2ccccc2nc2c3ccccc3c(NCc3ccco3)nn12
2341545	1	O=C(Cn1nc(C(=O)O)c2ccccc2c1=O)Nc1nc(-c2ccccc2)cs1
24790032	1	CCOC(=O)[C@@H]1[C@H]2COc3cc(OC)ccc3[C@H]2N2C(=O)N(c3cccc(Cl)c3)C(=O)[C@]12C
4371160	1	COc1ccc(S(=O)(=O)N2CCOCC2)cc1NC(=O)c1ccccc1-c1ccc(C(F)(F)F)cc1
24981956	1	CCOc1ccc(NC(=O)c2ccc(NC(=O)COC(=O)c3ccc(NC(=O)CC#N)cc3)cc2)cc1
9643743	1	O=S1(=O)N=C(N(CCO)/N=C/c2ccc(Br)cc2)c2ccccc21
3237615	1	COc1cccc(CNC(=O)c2cc3oc4ccccc4c3n2C)c1OC
1926759	1	CCCCn1c(CN2C(=O)c3ccccc3C2=O)nc2ccccc2c1=O
3245260	1	O=C(CSc1nc2c(c(=O)n1-c1ccc(Br)cc1)SCC2)Nc1nccs1
1490418	1	COc1ccc(S(=O)(=O)NNC(=O)c2cc3c4ccccc4n(C)c3s2)cc1
4112671	1	O=C(NCCC1=CCCCC1)C1CCC(CNc2nc(=S)[nH]c3ccccc23)CC1
24793636	1	CCOC(=O)Cc1ccc(NC(=O)NNC(=O)c2cc3sccc3[nH]2)cc1
3240236	1	CC(C)NC(=O)C1CC(=O)N(c2ccc(F)c(Cl)c2)C1
1844438	1	O=C(Nc1ccc2oc(=O)ccc2c1)c1ccc(-c2cccc(Cl)c2)o1
2302638	1	O=S(=O)(NCCOc1ccccc1)c1ccc2ccccc2c1
3192879	1	O=C(NNC(=O)C1CCN(S(=O)(=O)c2ccc(Cl)cc2)CC1)c1ccc(S(=O)(=O)N2CCCCC2)cc1
659700	1	N#Cc1c2ncn(CC(=O)c3ccc(Br)cc3)c(=O)c2c2n1CCC2
3157351	1	CCC(=O)Nc1nnc(SCC(=O)c2ccc3c(c2)Cc2ccccc2-3)s1
3802184	1	O=c1[nH]c(=S)[nH]c2c1C(c1ccc(Br)cc1)c1c([nH]c(=S)[nH]c1=O)O2
2529637	1	O=C(CSc1nc2ncc(Cl)cc2[nH]1)c1c[nH]c2ccccc12
2125817	1	O=C(NCc1ccc(Cl)cc1)c1ccccc1CCc1ccccc1
646642	1	Cc1cccc(OCc2nnc(SCC(=O)Nc3cc(C)on3)n2C)c1
841941	1	S=C(NCc1ccco1)Nc1ccc(Cl)cc1
4113455	1	C=CCn1c(=NC(=O)c2sc3ccccc3c2Cl)sc2cc(S(N)(=O)=O)ccc21
2084086	1	O=C(NC(=S)Nn1cnc2c(cnn2-c2ccccc2)c1=O)c1ccc(Oc2ccccc2)cc1
15944835	1	Cc1ccc(N2CC(C(=O)Nc3nnc(SCC(=O)Nc4nc(C)cs4)s3)CC2=O)cc1
24792028	1	COc1cc(C)ccc1OCc1cc(C(=O)N2CCC(c3ccc(F)cc3)C2)no1
872665	1	CCOc1ccc2nc3ccc4[nH]onc4c3c2c1
2358203	1	O=C1COc2ccc(C(=O)COC(=O)c3cc(S(=O)(=O)NCc4ccccc4)ccc3O)cc2N1
1402210	1	O=c1[nH]c(=O)n(CCc2ccccc2)c(O)c1C=NCc1ccc2c(c1)OCO2
1448428	1	Cc1nn(CC(=O)NCc2cccc3ccccc23)c(=O)c2ccccc12
817359	1	CC(=O)c1ccc(NC(=S)NC(=O)Cc2ccc(Cl)cc2)cc1
3227796	1	COc1ccc(-n2ncc3c(=O)n(CC(=O)N4c5ccccc5CC4C)cnc32)cc1
790305	1	CC(=O)CCc1c(C)nc2ccc(C(=O)O)cc2c1Cl
656122	1	COc1ccc2nc3sc(C(=O)NCc4cccs4)c(N)c3cc2c1
5340350	1	O=C(N/C(=C/c1ccc(Br)cc1)c1nc2ccccc2[nH]1)c1ccco1
7119398	1	Cc1ccccc1-c1nsc(SCC(=O)Nc2ccc3c(c2)OCO3)n1
9586709	1	Cc1ccc(/C(N)=N/OC(=O)c2ccc3ccccc3c2)cc1
898979	1	COC(=O)c1c(NC(=O)c2ccccc2)sc2c1CC(C)(C)OC2
1371168	1	Cc1ccnc(NS(=O)(=O)c2ccc(NC(=O)c3cc(-c4ccc(Br)cc4)nc4ccccc34)cc2)n1
22548467	1	COc1cccc(N2CCN(S(=O)(=O)c3cc4c(cc3Cl)NC(=O)CO4)CC2)c1
135476847	1	CCOC(=O)C1=C(C)Nc2nc(SCC)nn2C1c1ccc(OC)cc1
4191632	1	O=C(CCCCCn1c(=S)[nH]c2ccccc2c1=O)NCc1ccc2c(c1)OCO2
2983542	1	Cc1ccc(Nc2nc(Oc3ccc(OCc4ccccc4)nn3)nc(N3CCOCC3)n2)cc1
12004618	1	Cc1ccc(-n2cccc2/C=C2/C(=N)N3C(=NC2=O)SN=C3S(C)(=O)=O)cc1Cl
16194166	1	Cn1c2ccccc2c2cnn(CC(=O)Nc3ccccc3Br)c(=O)c21
6260087	1	Cc1ccc(S(=O)(=O)N(CC(=O)N/N=C\c2cccs2)c2cccc3cccnc23)cc1
5960658	1	COc1ccc(/C=C/C(=O)Nc2ccccc2C(F)(F)F)cc1
16745868	1	CCCNC(=O)c1ccc2c(=O)c(O)c(-c3ccc(OC)cc3)[nH]c2c1
3244464	1	O=C(Cc1ccc(-n2cccc2)cc1)NCc1cccs1
5094887	1	Cc1ccc(C)c(NC(=O)C(Sc2nc3ccccc3c(=O)n2CC(C)C)c2ccccc2)c1
24978983	1	CCOc1ccc(NC(=O)CN(C)C(=O)/C=C/c2ccc(S(=O)(=O)N3CCCCCC3)cc2)cc1OCC
2157342	1	CCOC(=O)c1[nH]c2ccccc2c1NC(=O)c1ccc2c(c1)OCO2
9550090	1	COCCCNC(=O)c1ccc(Cn2c(=O)c3ccccc3n(Cc3ccccc3C#N)c2=O)cc1
2242822	1	CCOc1ccc(C)cc1S(=O)(=O)Nc1cc(OC)c(Cl)cc1OC
1981152	1	COc1ccc(/C=C/C(=O)NC(=S)Nc2ccc(S(N)(=O)=O)cc2)cc1
3207506	1	Cc1ccc2nc(SCC(=O)NCc3cccs3)c(C#N)cc2c1
1306656	1	O=C(Nc1cccc(C(=O)Nc2ccc(Br)cc2)c1)c1ccccc1
3586727	1	CCNc1ccc(C(=O)OC(C(=O)NC(N)=O)C(C)C)cc1[N+](=O)[O-]
2917753	1	CCOC(=O)c1sc(N2C(=O)C(O)=C(C(=O)c3ccc(C)o3)C2c2cccc([N+](=O)[O-])c2)nc1C
2571370	1	Cc1ccc(S(=O)(=O)N2CCC(C(=O)OCC(=O)N3CCc4ccccc43)CC2)cc1
24819873	1	Cc1ccccc1NC(=O)Cc1nc(COC(=O)c2cc(Cl)ccc2O)cs1
2115409	1	COc1ccc(NC(=O)COC(=O)c2ccc(OCc3ccccc3Cl)c(OC)c2)c(OC)c1
1862100	1	CSc1nsc(SCC(=O)Nc2nc3ccc(C)cc3s2)n1
2220147	1	O=C(CCn1cnc2ccccc2c1=O)Nc1nc(-c2ccc(Br)cc2)cs1
6892904	1	O=C(N/N=C/c1ccc(-c2ccc(S(=O)(=O)Nc3ncccn3)cc2)o1)c1cc2ccccc2cc1O
135418650	1	COc1ccc(N=C2NC(=O)/C(=C/C=C/c3ccccc3)S2)cc1
4432356	1	CCN(CC)S(=O)(=O)c1cc(NC(=O)CSc2nc3c(cc2C#N)C(=O)CC(C)(C)C3)ccc1C
2364133	1	NC(=O)c1ccc(NC(=O)COC(=O)/C=C/c2ccc3c(c2)OCO3)cc1
5513575	1	N=C1/C(=C\c2ccc(-c3cccc(C(=O)O)c3)o2)C(=O)N=C2SC=C(c3ccccc3)N12
24791978	1	COc1cc(C(=O)NC2CC(C)(C)Cc3c2cnn3-c2ccccc2)cc(OC)c1OC
1450278	1	Cc1cc(C)c2cc(C#N)c(SCC(=O)Nc3ccc4c(c3)OCO4)nc2c1
6889164	1	O=C(N/N=C/c1ccc(F)cc1)c1cc(-c2ccc3c(c2)OCO3)n[nH]1
2447752	1	Cc1cc(C)n(-c2ccc(C(=O)OCC(=O)NC(c3ccccc3)c3ccccc3)cc2)n1
12006289	1	Br.O=C(CSc1nc2ccccc2c(=O)n1-c1ccccc1)c1cccc([N+](=O)[O-])c1
5212443	1	O=C(NCC1OCCc2ccccc21)c1ccc(NC(=O)c2ccc(Cl)cc2)cc1
3302103	1	Cn1c(N)c(C(=O)COC(=O)CSc2cccc3cccc(Cl)c23)c(=O)n(C)c1=O
653834	1	O=C(CSc1nnc2c3c4c(sc3ncn12)CCCC4)NCc1ccco1
1523408	1	CCN1C(=O)c2cccc3c(S(=O)(=O)Nc4ccc(OC)cc4OC)ccc1c23
712214	1	Cc1ccnc(SCC(=O)N2CCc3ccccc32)n1
16682266	1	CN(C)c1ccc(/C=C/C=C/c2sc3ccccc3[n+]2C)cc1.[O-][Cl+3]([O-])([O-])[O-]
712283	1	N#Cc1nc(N)nc(N(c2ccccc2)c2ccccc2)n1
20959264	1	CC(=O)Nc1ccc(S(=O)(=O)Nc2c(NC3CCCCC3)c3ccccc3oc2=O)cc1
1002458	1	COc1ccc(-c2ccc(C#N)c(SCC(=O)NC3CC3)n2)cc1OC
1432534	1	O=C(CSc1ncccc1-c1nc2ccccc2[nH]1)N1CCc2ccccc21
2212827	1	Cn1c(CNC(=O)c2ccc(Cl)c(Cl)c2)nnc1SCC(=O)Nc1sc2c(c1C#N)CCCC2
3239575	1	CCCCCn1c(=O)[nH]c2cc(C(=O)NCc3ccc4c(c3)OCO4)ccc2c1=O
20968686	1	CC1CCCCC1NC(=O)C1CCC(CNS(=O)(=O)c2ccccc2)CC1
6466120	1	Cc1ccc(NC(=O)NCc2ccc3c(c2)OCO3)cc1C
1217293	1	COc1ccc(C(=O)COC(=O)c2ccc(NC(=O)c3ccccc3)cc2)cc1
4455991	1	CCOC(=O)N1CCc2c(sc(NC(=O)C3COc4ccccc4O3)c2C(N)=O)C1
2207017	1	NS(=O)(=O)c1ccc(NC(=S)Nc2ccn(Cc3cccc4ccccc34)n2)cc1
659694	1	COC(=O)c1ccc(Nc2cc(C)nc(-c3ccccc3O)n2)cc1
649505	1	O=C(Nc1ccc2c(c1)OCO2)C1CCN(c2ccc(S(=O)(=O)N3CCOCC3)cc2)CC1
2252839	1	Cc1cccc(NC(=O)CN2C(=O)S/C(=C\c3cc(C)n(C)c3C)C2=O)c1
4043922	1	Cc1ccc2nc3c(c(C(=O)OC4CCOC4=O)c2c1)CCCC3
1472461	1	Cc1cc(C)c2c(-n3cccc3)c(C(=O)NNS(=O)(=O)c3ccc(Cl)cc3)sc2n1
1272394	1	COc1ccc(C(=O)Nc2nnc(Cc3cccs3)s2)cc1OC
5310369	1	CCOc1ccc(-n2nnc3c(=O)n(CC(=O)c4ccccc4)cnc32)cc1
2946430	1	O=C(NCC1OCCc2ccccc21)c1ccc(NC(=O)c2cccc(Br)c2)cc1
6906743	1	COc1cccc(/C=N/NC(=O)c2ccc(CN3c4cccc5cccc(c45)S3(=O)=O)cc2)c1
3132120	1	Cc1ccc2nc(NC(=O)CSCC(=O)OCC(=O)c3ccc(Br)cc3)sc2c1
1255215	1	CCn1c(SCC(=O)c2c[nH]c3ccccc23)nnc1-c1cccs1
3900506	1	CC1CC(C)CN(C(=O)c2cccc(S(=O)(=O)Nc3cc(C(F)(F)F)ccc3Cl)c2)C1
1489562	1	Cc1cccc(-c2cc3c(N=O)c4ccccc4c-3n[nH]2)c1
3516389	1	CCOCCCn1c(SCC(=O)NCc2ccco2)nc2c(sc3ccccc32)c1=O
2437830	1	Cc1ccc(-c2nc(SCC(=O)Nc3ccccc3OC(F)F)c3c(C)c(C(=O)O)sc3n2)cc1
11958493	1	CCOc1cccc(SCc2noc(C(=O)NC(C)C)c2C(=O)O)c1
1460286	1	Cc1sc2nc(SCC(=O)Nc3ccccc3F)[nH]c(=O)c2c1C
1965991	1	CC1=CC2=NC(=O)/C(=C\c3ccc(-c4cccc(Cl)c4)o3)C(=N)N2O1
2829508	1	Cc1cccc(C)c1NC(=O)C(NC(=O)CN1C(=O)c2ccccc2C1=O)c1ccccc1
659752	1	Cc1ccc(C)n1Cc1ccc(C(=O)O)cc1
9551157	1	CCOc1ccc(NC(=O)c2cc3cc4ccc(OC)cc4nc3o2)cc1
2214925	1	CCn1c(Cc2ccccc2)nnc1SCC(=O)Nc1ccc2c(c1)OCCO2
6882095	1	COc1ccc(/C=N/n2cnc3c([nH]c4ccccc43)c2=O)cc1CO
1245647	1	NC(=O)c1c(-c2ccc(Cl)cc2Cl)csc1NC(=O)Cc1ccccc1
858970	1	Cc1ccc(C(=O)CSc2nnc(-c3c[nH]c4ccccc34)o2)cc1
1616361	1	Cc1ccc(C(=O)COC(=O)CNC(=O)c2ccc(N3C(=O)c4ccccc4C3=O)cc2)cc1C
2192587	1	CCN1C(=O)/C(=C2/C=Cc3cc(C)ccc3N2CC)N(C)C1=S
6619321	1	C=CCn1c(=O)c2ccc(C(=O)NCc3ccccc3)cc2n(Cc2ccccc2)c1=O
4010129	1	C=CCOc1ccc(-c2nc3c(c(=O)[nH]c(=O)n3Cc3ccccc3)n2CCCOC)cc1
135467614	1	O=C(Cn1c(O)c(/C=C2\C=Nc3ccc(Br)cc32)sc1=O)N1CCCC1
2205293	1	O=C(Cc1cccc2ccccc12)Nc1ccc(-c2cc3ccccc3oc2=O)cc1
15944876	1	Cc1ccc(NC(=O)Cn2cc(S(=O)(=O)c3ccc(F)cc3)c(=O)c3cc(F)ccc32)cc1
4054648	1	COc1ccc(CNC(=O)CN2C(=O)C3CCCN3c3ncc(Cl)cc32)cc1
2679217	1	COc1ccc2oc(C(=O)Nc3nccs3)c(C)c2c1
1846698	1	Cc1ccc2oc(-c3ccc(C)c(NC(=S)NC(=O)c4cccs4)c3)nc2c1
2315524	1	Cc1ccc(-c2nn(-c3ccccc3)cc2/C=C2\SC(=S)N(CCCCCC(=O)O)C2=O)o1
3241513	1	COc1ccc(-n2nc(C(=O)Nc3ccc4c(c3)OCO4)c3ccccc3c2=O)c(OC)c1
876145	1	Cc1ccccc1OCC(=O)Nc1ccc2c(c1)Cc1ccccc1-2
5349041	1	O=C(N/N=C\c1ccc(CNS(=O)(=O)c2ccc(Cl)cc2)o1)C(=O)Nc1ccc(Oc2ccccc2)cc1
4112670	1	O=C(NCCc1ccc(Cl)cc1)C1CCC(CNc2nc(=S)[nH]c3ccccc23)CC1
4340364	1	O=C(NCc1ccc2c(c1)OCO2)C1CCC(CNS(=O)(=O)c2ccc(Cl)cc2)CC1
1107886	1	Cc1ccc(N(Cc2ccc(C(=O)NC3CCCCC3)cc2)S(C)(=O)=O)cc1C
16822022	1	O=c1[nH]cc(S(=O)(=O)N2CCN(c3cccc(C(F)(F)F)c3)CC2)c(=O)[nH]1
6517214	1	COc1ccccc1/C=C1\SC(=S)N(NS(=O)(=O)c2ccc(C)cc2)C1=O
24980587	1	CCCCN(C(=O)c1cccc(-n2cccc2)c1)c1c(N)n(Cc2ccccc2)c(=O)[nH]c1=O
4378441	1	O=C(Nc1ccc2oc(-c3ccc4ccccc4c3)nc2c1)c1ccc2c(c1)OCCO2
4317586	1	COC(=O)C1=C(N)N(c2ccccc2C(F)(F)F)C2=C(C(=O)CCC2)C1c1ccc2c(c1)OCO2
647237	1	Cc1ccc(C(=O)CSc2nnc(CNc3ccc(C)cc3C)o2)cc1
3297297	1	COc1ccc(O)c(-c2cc(C(F)(F)C(F)F)nc(-c3ccccc3)n2)c1
2840067	1	Br.Cc1ccc(Nc2nc(-c3ccc(S(=O)(=O)N4CCOCC4)cc3)cs2)cc1Cl
135479533	1	O=C(N/N=C/c1ccc(O)cc1)c1nc(-c2ccccc2)n(-c2ccccc2)n1
1073612	1	N#C/C(=C\c1cn(Cc2ccccc2C#N)c2ccccc12)C(=O)NCc1cccs1
1340468	1	CCC(=O)Nc1cccc(NC(=S)NC(=O)c2cc3ccccc3o2)c1
3239874	1	O=C(Cn1cnc2c(nnn2Cc2ccc(Cl)cc2)c1=O)OCc1ccccc1
2202	1	O=C1c2c(O)cccc2Cc2cccc(O)c21
1858274	1	Cc1ccc(O)c(-c2cc(C(=O)NCc3ccccc3)[nH]n2)c1
2121076	1	NC(=O)c1cc(-c2ccccc2)sc1NC(=O)Cc1ccc(S(=O)(=O)N2CCOCC2)s1
2916390	1	O=S(=O)(Nc1nc(-c2ccccc2)cs1)c1cc(Cl)ccc1Cl
3457989	1	Cc1ccc(NC(=O)c2sc3ncn(CC(=O)N4CCN(c5ccccn5)CC4)c(=O)c3c2C)cc1Cl
24687269	1	Cc1cccnc1NC(=O)c1ccc(S(=O)(=O)N2CCC(C)CC2)cc1
1017543	1	CCOC(=O)c1ccc(NC(=O)Cn2c(-c3nonc3N)nc3ccccc32)cc1
4385691	1	O=C(COC(=O)c1ccc(CNS(=O)(=O)c2ccc(F)c(Cl)c2)cc1)NCC1CCCCC1
3192484	1	O=C(c1ccccc1F)N1CCN(S(=O)(=O)c2ccc(S(=O)(=O)N3CCCCCC3)cc2)CC1
4519805	1	Cc1ccc(S(=O)(=O)N(C(=N)N)c2nc(N(C)C)nc(N(C)C)n2)cc1
2370545	1	COc1ccc(-c2csc(NC(=O)COC(=O)Cc3ccccc3)n2)cc1OC
2471485	1	NS(=O)(=O)c1ccc(NC(=O)/C=C/c2cn(-c3ccccc3)nc2-c2cccc(Cl)c2)cc1
135521462	1	Cc1ccc(NC(=O)C2CC(=O)N/C(=N/N=C/c3ccco3)S2)cc1C
6886843	1	O=C(N/N=C/c1ccc2c(c1)OCO2)c1cc2ccccc2o1
5334401	1	O=C1S/C(=C\c2ccccc2)C(=O)N1CC(O)Cn1c2ccccc2c2ccccc21
9597154	1	COc1cccc(/C=N/NC(=O)C(=O)Nc2ccccc2OC(F)(F)C(F)F)c1
54682936	1	CN(C)[C@@H]1C(=O)C(C(N)=O)=C(O)[C@@]2(O)C(=O)C3=C(O)c4c(O)cccc4[C@@](C)(O)[C@H]3[C@H](O)[C@@H]12.O
652267	1	CC1CCN(S(=O)(=O)c2ccc(NC(=O)Cn3nnc(-c4ccccc4)n3)cc2)CC1
805894	1	COC(=O)c1sc(NC(=O)COc2ccc(OC)cc2)nc1C
135498036	1	CC(=O)C(/C=N/c1cc(-c2ccc(C)cc2)nn1-c1ccccc1)=C(\C)O
654231	1	N#Cc1ccccc1OCC(=O)Nc1c(C(=O)C2CC2)oc2ccccc12
2140504	1	N#Cc1cc2c(nc1SCC(=O)Nc1nccs1)CCCCC2
24892500	1	COCCn1c(SCC(=O)Nc2ccccc2OC)nc2c([nH]c3ccccc32)c1=O
876296	1	CCOc1ccc(NC(=O)c2ccc(C#CC(C)(C)O)cc2)cc1
651829	1	Cc1sc2nc(SCC(=O)NCc3ccco3)n(CCc3ccccc3)c(=O)c2c1C
653914	1	COc1ccc(-c2nnn(CC(=O)N(CC(=O)NCCC(C)C)Cc3cccs3)n2)cc1OC
15988663	1	COc1ccc(OC)c(-c2cc(C(=O)NCc3ccc(Cl)cc3)no2)c1
4094372	1	O=c1c2cc(N3CCOCC3)ccc2[nH]c(=S)n1Cc1cccc(Cl)c1
2123745	1	CCn1c(CSc2nnc(-c3ccncc3)n2C)nc2cc(C(=O)O)ccc21
2891964	1	O=C(c1ccc(S(=O)(=O)N2CCCCCC2)cc1)N1CCC(CN2C(=O)c3cccc4cccc(c34)C2=O)CC1
3970866	1	CCOC(=O)c1ccc(NC(=O)C2CC(=O)Nc3nc4ccccc4n32)cc1
54683760	1	CCn1c(=O)c(C(=O)NCc2ccc(OC)c(OC)c2)c(O)c2ccccc21
2658094	1	CN(CC(=O)Nc1ccc(Cl)c(Cl)c1)CC(=O)Nc1ccc2c(c1)OCO2
6602956	1	CCn1c(CSc2nnc(-c3cccnc3)n2-c2ccccc2C)nc2cc(C(=O)O)ccc21.Cl
832284	1	CCN(CC)c1ccc(N=Cc2ccc([N+](=O)[O-])o2)cc1
663844	1	O=C1c2ccccc2-c2onc3ccc(NCCCn4ccnc4)c1c23
1192514	1	CCOC(=O)Cc1csc(NC(=O)COc2ccccc2OCC)n1
1832377	1	COc1cccc(NC(=S)N2CCc3cc(OC)c(OC)cc3C2)c1
24789877	1	O=C(NCCCN1CCOCC1)c1ccc(/C=C2\Oc3ccccc3N(Cc3ccccc3F)C2=O)cc1
1394220	1	CC1(C)Cc2c(sc(NC(=O)COc3cccc4ccccc34)c2C#N)C(C)(C)N1
5740156	1	O=C(COc1ccccc1/C=C\c1[nH]c(=O)[nH]c(=O)c1[N+](=O)[O-])Nc1ccccc1
144529	1	CC1(C)CC(=O)C=C(c2ccc(-c3ccccc3)cc2)C1
3231104	1	Cc1ccc2nc(-c3ccc(SCC(=O)Nc4nc(C)cs4)nc3)[nH]c2c1
24978563	1	C#CCOCCOCCOCCNc1nc(N2CCN(C(=O)CCCCCCCCCCNC(=O)[C@H](CCCCN)n3cc(CCCC(=O)O)nn3)CC2)nc(N2CCN(C(=O)CCCCCCCCCCNC(=O)[C@H](CCCN=C(N)N)n3cc(C[C@@H](C)CC)nn3)CC2)n1
24978595	1	C#CCOCCOCCOCCNc1nc(N2CCN(C(=O)CCCCCCCCCCNC(=O)Cn3cc(CCCCCN)nn3)CC2)nc(N2CCN(C(=O)CCCCCCCCCCNC(=O)Cn3cc(CCCCCN)nn3)CC2)n1
460749	1	Cn1nc(-c2ccc(Cl)cc2)nc2c(=O)n(C)c(=O)nc1-2
1833641	1	CCN(CC)CCOC(=O)c1ccc(N/C=C(/C#N)c2nc(-c3ccc(OC)cc3)cs2)cc1
266331	1	O=C(Nc1csnn1)c1csnn1
5953984	1	O=C(NN1C(=O)/C(=C/C=C/c2ccco2)SC1=S)c1ccccc1O
107794	1	NC(Cc1cc(O)c(O)cc1O)C(=O)O
3546540	1	COc1ccc(N2CCN(C(=O)CN3C(=O)COc4ccccc43)CC2)cc1
2765086	1	O=C(Nc1ccc(N2CCCC2)cc1)C(Cl)c1ccccc1
970760	1	Cc1ccc([N+](=O)[O-])cc1NC(=O)C1CCN(S(C)(=O)=O)CC1
5740058	1	C#CCOc1c(/C=C\c2nc(O)c([N+](=O)[O-])c(=O)[nH]2)cc(Br)cc1OC
24892023	1	COc1cc2nc(N(CCCN(C)C)C(=O)c3ccc(S(=O)(=O)N4CCc5ccccc54)cc3)sc2cc1OC.Cl
25163006	1	C#CCOCCOCCOCCNc1nc(N2CCN(C(=O)CCCCCCCCCCNC(=O)[C@H](CCCCN)n3cc(C[C@@H](C)CC)nn3)CC2)nc(N2CCN(C(=O)CCCCCCCCCCNC(=O)[C@@H]([C@H](C)O)n3cc(C)nn3)CC2)n1
46496151	1	Cc1ccc(C(=O)Nc2ccc(C(=O)N/N=C/c3ccncc3)cc2)cc1
23724230	1	CCC(=C/c1sc2ccc3ccccc3c2[n+]1C)/C=C1\Sc2ccc3ccccc3c2N1C.[Cl-]
2030134	1	O=C1NC(=S)S/C1=C\c1coc2ccc(O)cc2c1=O
5739979	1	Cc1cccc(NC(=O)COc2ccc(/C=C\c3[nH]c(=O)[nH]c(=O)c3[N+](=O)[O-])cc2)c1
16428168	1	O=C(CCN1C(=O)/C(=C\c2ccco2)SC1=S)Nc1ccc(C(=O)O)c(O)c1
2571625	1	Cc1cccc(NC(=O)CCNC(=O)c2ccco2)c1
988533	1	O=c1[nH]c(=S)n(-c2ccccc2F)c(O)c1C=Nc1ccc(N2CCOCC2)cc1
655274	1	CCCC(=O)Nc1ccc2oc(-c3cccnc3)nc2c1
3381553	1	C=CCn1c(O)c(C=Nc2ccc(N(CC)CC)cc2)c(=O)[nH]c1=O
6050449	1	O=C(O)CCn1cc(/C=C/C(=O)c2ccc(Cl)cc2)c(-c2ccc(Br)cc2)n1
24816490	1	Cc1nc(Nc2cnc(/C=C/c3cc(C(=O)Nc4cccc(C(F)(F)F)c4)ccc3C)cn2)cc(N2CCNCC2)n1.O=C(O)C(F)(F)F
3241741	1	Cc1ccc(-n2nc(C(=O)NCc3ccco3)c3c4ccccc4n(C)c3c2=O)cc1
18579402	1	CCOc1ccc(NC(=O)CSc2nccn(-c3ccc4c(c3)OCCO4)c2=O)cc1
24792840	1	CN1CCN(CCCNC(=O)c2ccc(/C=C3\Oc4ccccc4N(Cc4ccc(Cl)cc4)C3=O)cc2)CC1
3627083	1	Cc1ccc(O)c(CNCCNCc2cc(C)ccc2O)c1
2818532	1	O=c1[nH]c(-c2ccc(Cl)cc2)nc(=S)[nH]1
908963	1	COc1cccc(=O)c2c(C)n(-c3ccc(C(=O)O)cc3)c(C)c12
25163020	1	C#CCOCCOCCOCCNc1nc(N2CCN(C(=O)CCCCCCCCCCNC(=O)Cn3cc(CCCCCN)nn3)CC2)nc(N2CCN(C(=O)CCCCCCCCCCNC(=O)Cn3cc(C[C@@H](C)O)nn3)CC2)n1
460747	1	Cc1nc2c(=O)n(C)c(=O)nc-2n(C)n1
796420	1	Oc1ccc(N=Cc2ccc(-c3cccs3)s2)cc1
2999917	1	CCCCC1(C)NC(=O)N(CC(=O)Nc2ccc(S(=O)(=O)N3CCOCC3)cc2)C1=O
1475987	1	COc1ccc(Sc2nc3ccccc3n3c(C(F)(F)F)nnc23)cc1
1450417	1	COc1ccc2nc(SCC(=O)Nc3cc(C)on3)c(C#N)cc2c1
2211690	1	O=C(Nc1ccc2oc(-c3ccncc3)nc2c1)c1ccc2c(c1)OCO2
459078	1	Cc1ccc(C)n1-c1ccc(C(=O)O)cc1
1160447	1	O=C(Nc1ccc(-c2nc3ccc(NC(=O)c4cccs4)cc3[nH]2)cc1)c1cccs1
3497737	1	CCN(CC)C(=O)c1ccc2c(c1)C1C(Cl)C(Sc3ccccc3[N+](=O)[O-])CC1C(C(=O)O)N2
16196440	1	C#CCOCCOCCOCCNc1nc(N2CCN(C(=O)[C@H](Cc3cc4ccccc4[nH]3)n3cc([C@@H](N)Cc4ccc(O)cc4)nn3)CC2)nc(N2CCN(C(=O)[C@H](Cc3cc4ccccc4[nH]3)n3cc([C@@H](N)C(C)CC)nn3)CC2)n1.Cl
5336979	1	O=c1[nH]c(/C=C/c2ccc(Cl)cc2Cl)c([N+](=O)[O-])c(=O)[nH]1
891297	1	O=C1CC(=O)N(Cc2ccco2)C(=S)N1
24983085	1	C#CCOCCOCCOCCNc1nc(N2CCN(C(=O)CCCCCCCCCCNC(=O)[C@H](CCCCN)n3cc(CCO)nn3)CC2)nc(N2CCN(C(=O)CCCCCCCCCCNC(=O)[C@H](CCCCN)n3cc(C[C@@H](C)CC)nn3)CC2)n1
3491956	1	CCC(C)Nc1nc(-c2c[nH]c3ccccc23)cs1
1095027	1	Nc1ccc(N2CCOCC2)c2nonc12
874557	1	COc1ccc(CCC(=O)Nc2ccc3c(c2)OCCO3)cc1
776845	1	Cc1cc(C(=O)O)ccc1-n1c(C)ccc1C
24761551	1	CCN(CC)c1ccc(/C=C/c2ccc3ccc(OC)cc3[n+]2CC)cc1.[I-]
2334194	1	CCOC(=O)c1c(NS(=O)(=O)c2ccccc2)n(CCCOC)c2nc3ccccc3nc12
24978573	1	C#CCOCCOCCOCCNc1nc(N2CCN(C(=O)CCCCCCCCCCNC(=O)Cn3cc(C[C@@H](C)O)nn3)CC2)nc(N2CCN(C(=O)CCCCCCCCCCNC(=O)[C@H](CCCN=C(N)N)n3cc(C[C@@H](C)CC)nn3)CC2)n1
25162995	1	C#CCOCCOCCOCCNc1nc(N2CCN(C(=O)CCCCCCCCCCNC(=O)[C@H](CCCCN)n3cc(C)nn3)CC2)nc(N2CCN(C(=O)CCCCCCCCCCNC(=O)[C@H]([C@@H](C)CC)n3cc(CCCCN=C(N)N)nn3)CC2)n1
835173	1	O=C(O)c1cccc(-n2cccc2/C=C/[N+](=O)[O-])c1
1942142	1	C=CCn1c(NS(=O)(=O)c2ccccc2)c(S(=O)(=O)c2ccc(C)cc2)c2nc3ccccc3nc21
6237926	1	O=C(CN1C(=O)/C(=C/c2ccco2)SC1=S)Nc1ccc(C(=O)O)c(O)c1
15945060	1	O=C(OCC1O[C@@H](OC(=O)c2cc(O)c(O)c(O)c2)[C@@H](OC(=O)c2cc(O)c(O)c(O)c2)[C@@H](OC(=O)c2cc(O)c(O)c(O)c2)[C@@H]1OC(=O)c1cc(O)c(O)c(O)c1)c1cc(O)c(O)c(O)c1
1095028	1	Nc1ccc(N2CCCCC2)c2nonc12
16189474	1	CCN1CCN(CCNC(=O)c2ccc(/C=C3/Sc4ccccc4N(Cc4cccc(C)c4)C3=O)cc2)CC1
947839	1	O=C(/C=C/c1ccco1)NC(=S)Nc1ccc(C(=O)O)cc1
272529	1	O=C1C=C(N2CCOCC2)c2ccccc2C1=O
25163004	1	C#CCOCCOCCOCCNc1nc(N2CCN(C(=O)CCCCCCCCCCNC(=O)[C@H](CCCCN)n3cc(C[C@@H](C)CC)nn3)CC2)nc(N2CCN(C(=O)CCCCCCCCCCNC(=O)[C@@H](CCC(=O)O)n3cc(CCCCCN)nn3)CC2)n1
5824720	1	CCc1ccc(S(=O)(=O)/N=C2\C=C(Nc3ccc(C(=O)O)cc3)C(=O)c3ccccc32)cc1
24983210	1	C#CCOCCOCCOCCNc1nc(N2CCN(C(=O)CCCCCCCCCCNC(=O)Cn3cc(CCCCCN)nn3)CC2)nc(N2CCN(C(=O)CCCCCCCCCCNC(=O)[C@H](CO)n3cc(CCCCCN)nn3)CC2)n1
24978568	1	C#CCOCCOCCOCCNc1nc(N2CCN(C(=O)CCCCCCCCCCNC(=O)[C@H](CCCCN)n3cc(C)nn3)CC2)nc(N2CCN(C(=O)CCCCCCCCCCNC(=O)[C@H](CCCN=C(N)N)n3cc(C[C@@H](C)CC)nn3)CC2)n1
5703486	1	COc1cc(/C=C2\COC/C(=C\c3ccc(O)c(OC)c3)C2=O)ccc1O
2998761	1	Cn1c(=O)c2cc(NCc3ccccc3)nnc2n(C)c1=O
23675739	1	Cc1cc(C)c(Nc2cc(S(=O)(=O)[O-])c(N)c3c2C(=O)c2ccccc2C3=O)c(C)c1.[Na+]
2954299	1	CC(C)OC(=O)c1cc(NC(=S)Nc2ccc([N+](=O)[O-])cc2)cc(C(=O)OC(C)C)c1
6859174	1	Nc1nnnn1/N=C/c1ccc(F)cc1
671424	1	O=C1C(=Cc2ccc(Br)o2)C(=O)c2ccccc21
931219	1	Nc1nc(Nc2ccccc2F)sc1C(=O)c1ccccc1
16190838	1	CC(C)Oc1ccc(CCNC(=O)CC2C(=O)NCCN2C)cc1
972486	1	COc1ccc(C(=O)Nc2ccc(C(=O)Nc3cccnc3)cc2)cc1
2900882	1	COc1ccc(NC(=O)CCN2CCCC(C)C2)cc1
15944990	1	OC(CNCCC1C=Nc2ccccc21)Cn1c2ccc(Cl)cc2c2cc(Cl)ccc21
1221200	1	Cc1ccc(-n2[nH]c(C)c(C=Nc3ccc4[nH]c(=O)[nH]c4c3)c2=O)cc1C
5766967	1	O=C(O)c1cc(Cl)ccc1-c1ccc(/C=C/c2cc(C(F)(F)F)[nH]c(=O)n2)o1
16242656	1	O=C(O)C(=O)O.OC(Cn1cnnc1)c1ccccc1
6515925	1	C/C(N)=C(/C#N)C(=O)CSc1nnc(COc2cc(C)ccc2C)o1
17579079	1	O=C(CCCN1C(=O)/C(=C\c2ccco2)SC1=S)Nc1ccc(O)cc1C(=O)O
1426215	1	Cc1cc(=O)n2c(C(=O)Nc3ccc(C)c(C)c3)c(C(=O)Nc3ccccc3)sc2n1
1587345	1	CC1C/C(=C\c2cccnc2)C(=O)/C(=C/c2cccnc2)C1
651969	1	CC(C)(C)n1nnnc1C(c1cccc(C#N)c1)N1CCCc2ccccc21
2102825	1	CN(C)c1ccc(C(=O)OCC(=O)Nc2ccc(S(N)(=O)=O)cc2)cc1
3140438	1	Cc1ccc2sc(NC(=O)CSc3nc(C)cc(C)c3C#N)nc2c1
652912	1	COc1cccc2c1NC(C(=O)O)C1CC=CC21
2999671	1	CCn1c(CSc2nccn2C)nc2cc(C(=O)O)ccc21
44142437	1	COc1cc(C#Cc2c(-c3cncn3C)n(C)c3ccc(-c4ccc(OC)c(OC)c4)cc23)cc(OC)c1
1094274	1	Cn1c(SCC(=O)N2CCN(c3ccccc3)CC2)nnc1-c1ccncc1
1967839	1	CCN(CC)c1ccc(N=Cc2c(O)n(-c3ccccc3)c(=O)[nH]c2=O)cc1
16195575	1	CCN(CC)CCn1c(SCC(=O)Nc2ccc(F)cc2)nc2c(sc3ccccc32)c1=O.Cl
1474457	1	Cc1nc2c(-c3ccc(F)cc3)cnn2c(N)c1-c1ccc(F)cc1
753169	1	COc1ccc(NC(=S)Nc2ccc3nsnc3c2)cc1
2238361	1	Cc1ccccc1NC(=O)Nc1nc2ccc(S(C)(=O)=O)cc2s1
4870506	1	Cn1c(CCN2CCN(c3ccccn3)CC2)nc2cc(NC(=O)COc3ccc([N+](=O)[O-])cc3)ccc21
8070698	1	Cc1c(C)n(Cc2ccccc2)c2ncnc(NN)c12
44142442	1	COc1cc(C#Cc2c(-c3cncn3C)n(C)c3ccc(-c4cnc(OC)nc4)cc23)cc(OC)c1
5322711	1	O=C1/C(=C/c2cccnc2)CCC/C1=C\c1cccnc1
3136304	1	COc1cccc(NS(=O)(=O)c2ccc3c(c2)C2C=CCC2C(c2ccc(C(=O)O)cc2)N3)c1
5739891	1	CCOc1cc(/C=C\c2[nH]c(=O)[nH]c(=O)c2[N+](=O)[O-])ccc1OC(C)CC
6602975	1	CC1=CC(C)(C)Nc2ccccc21.Cl
1295575	1	COC(=O)c1ccc(NC(=O)c2ccc(NC(=O)c3ccco3)cc2)cc1
1976446	1	N=C1/C(=C\c2coc3ccccc3c2=O)C(=O)N=C2SC(c3ccncc3)=NN12
12004877	1	CC(C)c1onc(C(=O)N(C)Cc2ccccc2)c1[N+](=O)[O-]
135779762	1	COc1cc(/C=C2\S/C(=N/S(=O)(=O)Cc3ccccc3)NC2=O)c([N+](=O)[O-])cc1OC
44142144	1	Cn1nnnc1Sc1ncnc2scc(-c3cc4ccccc4o3)c12
665843	1	NC(=O)CSc1nc2sc3c(c2c2ncnn12)CCCC3
708043	1	Cc1ccsc1C=Nc1ccc(O)cc1
9644147	1	C/C(=N\NC(=S)NCCc1ccccc1)c1ccc(C#N)cc1
1804865	1	CCc1ccc(N2C(=O)NC(=O)/C(=C\c3cc(C)n(-c4cc(C(=O)O)cc(C(=O)O)c4)c3C)C2=O)cc1
3741391	1	CCN(CC)c1ccc(N=Cc2c(O)n(Cc3ccco3)c(=O)[nH]c2=O)cc1
3471858	1	Cc1ccc(-c2nn(-c3ccccc3)cc2C(=O)O)o1
8323	1	Nc1ccc(O)c2c1C(=O)c1ccccc1C2=O
6687	1	N=C1CCC(=N)c2c1c(O)c1ccccc1c2O
16746137	1	CCN1CCN(Cc2ccc(NC(=O)c3cc(NC(=O)c4cc5cccc(OC)c5o4)cc(OC)c3)cc2C(F)(F)F)CC1
2104886	1	CCn1c(CSc2nnc(-c3ccncc3)n2CCOC)nc2cc(C(=O)O)ccc21
23723977	1	CCOC(=O)C1(CCOc2ccccc2)CCN(C(=O)CCSC)CC1
2935661	1	CN(C)CCOc1ccccc1-c1ccccc1.O=C(O)C(=O)O
3969022	1	CCOc1ccccc1-n1c(O)c(C=Nc2ccc(N(CC)CC)cc2)c(=O)[nH]c1=O
4688385	1	CC(=O)NC1=C(Nc2ccc(N(C)C)cc2)C(=O)c2ccccc2C1=O
24978586	1	C#CCOCCOCCOCCNc1nc(N2CCN(C(=O)CCCCCCCCCCNC(=O)[C@H](CO)n3cc(CCCCCN)nn3)CC2)nc(N2CCN(C(=O)CCCCCCCCCCNC(=O)[C@@H](CCC(=O)O)n3cc(CCCCCN)nn3)CC2)n1
135498006	1	Cn1c(O)c(/C=N/N2CCCCC2)c(=O)[nH]c1=O
5729339	1	NC1=NC(=O)/C(=C/c2ccc(-c3ccc(S(N)(=O)=O)cc3)o2)S1
24892413	1	CCc1ccc2nc(N(CCCN(C)C)C(=O)c3ccc(S(=O)(=O)N4CCCc5ccccc54)cc3)sc2c1.Cl
2201978	1	Cc1cccc(N2C(=O)NC(=O)/C(=C/c3ccc([N+](=O)[O-])o3)C2=O)c1
695535	1	O=C(Nc1ccccc1Sc1ccccc1)c1ccccc1F
2932700	1	CCC(Oc1ccccc1)C(=O)Nc1nc2ccccc2[nH]1
1822015	1	CCc1nnc(NS(=O)(=O)c2ccc(NC(=S)NC(=O)/C=C/c3ccccc3)cc2)s1
1402102	1	COc1ccc(Nc2nc(C)nc3c2oc2ccccc23)c(OC)c1
1098907	1	Cc1ccc(C(=O)O)cc1N1C(=O)c2cccc3c([N+](=O)[O-])ccc(c23)C1=O
2478956	1	CCCCNC(=O)/C(C#N)=C/c1ccc(-c2ccc(S(=O)(=O)N3CCOCC3)cc2)o1
665509	1	CCc1nc(SCC(=O)Nc2nccs2)c2oc3ccccc3c2n1
5725793	1	O=C(/C=C/c1ccc(NC(=O)c2ccccc2-c2ccccc2C(=O)O)cc1)c1ccccc1
5433262	1	Cc1ccc(S(=O)(=O)/N=C2/C=C(Sc3ncn[nH]3)C(=O)c3ccccc32)cc1
16745808	1	COc1cc(NC(=O)c2csc(N)n2)cc(C(=O)Nc2cccc(C(F)(F)F)c2)c1
221125	1	O=C(O)CC1OCC=C2CN3CCC45C6=CC(=O)C(=O)C([N+](=O)[O-])=C6NC4C1C2CC35
1909010	1	O=C1NC(=O)N(c2ccccc2)C(=O)/C1=C\c1ccc([N+](=O)[O-])o1
16188817	1	CCOc1ccc(N2C(=O)/C(=C/c3ccccc3)N=C2SC)cc1
3157646	1	O=C(NCCO)Nc1ccc2nc(-c3ccco3)c(-c3ccco3)nc2c1
5737231	1	O=C1/C(=C\c2c(NCCOCCO)nc3ccccn3c2=O)SC(=S)N1Cc1ccco1
2458943	1	CSc1nnc(SCc2nc3sc(C(=O)O)c(C)c3c(=O)[nH]2)s1
5719375	1	CC[n+]1c(/C=C/N(C)c2ccccc2)n(-c2ccccc2)c2ccc(-c3nc4ccccc4s3)cc21.[I-]
44142374	1	COc1cc(OC)cc(-c2c(C#Cc3ccsc3)c3cc(-c4ccc(C(N)=O)cc4)ccc3n2C)c1
1014950	1	O=C(COc1ccc(Br)cc1Br)NC(=S)N1CCCc2ccccc21
7498672	1	O=C(Nc1ccc2c(c1)CCCN2C(=O)c1cccs1)c1c(F)cccc1Cl
3192040	1	CCCCNC(=S)N1CCN(C(c2ccccc2)c2ccccc2)CC1
92766	1	COC(=O)[C@@H]1[C@@H](O)CC[C@H]2CN3CCc4c([nH]c5ccccc45)[C@@H]3C[C@H]12
3244798	1	Cn1c2ccccc2c(=O)n2c(=O)c3ccccc3cc12
1622435	1	CCCOc1ccc(-c2csc3ncn(Cc4ccc(C(=O)O)cc4)c(=O)c23)cc1
16188433	1	CC1C/C(=C/c2ccncc2)C(=O)/C(=C/c2ccncc2)C1
16211935	1	COc1cccc2c1C(=O)c1c(O)c3c(c(O)c1C2=O)C[C@](O)(C(C)=O)C[C@H]3O[C@@H]1C[C@@H](N)[C@@H](O)[C@@H](C)O1.Cl
1871781	1	C=CCOc1ccc(/C=C2\SC(=S)N(N3CCOCC3)C2=O)cc1
3904348	1	CCN(CCO)c1ccc(NC(=S)Nc2cccc(S(=O)(=O)N(C)C)c2)cc1
2214811	1	O=C(Nc1ccc2nc(-c3ccco3)c(-c3ccco3)nc2c1)N1CCCCCC1
908952	1	CCOc1cccc(=O)c2c(C)n(-c3ccc(C(=O)O)cc3)c(C)c12
16745799	1	CCN1CCN(Cc2ccc(NC(=O)c3ccc(C)c(NC(=O)C(=O)c4c[nH]c5ccccc45)c3)cc2C(F)(F)F)CC1
2084159	1	CC(C)(C(=O)Nc1nccs1)c1ccccc1
833981	1	COc1ccc(Br)cc1CNc1ccc(O)cc1
1833916	1	CCN(CC)CCOC(=O)c1ccc(N/C=C(/C#N)c2nc(-c3cccc(OC)c3)cs2)cc1
5740112	1	O=c1[nH]c(/C=C\c2cccc(Cl)c2)nc(O)c1[N+](=O)[O-]
1974579	1	COc1ccc(/C=C/C(=O)NC(=S)Nc2ccc(S(=O)(=O)N=C(N)N)cc2)cc1OC
1262714	1	O=C(Nc1cccc(C(=O)N2CCCCCC2)c1)c1ccco1
25163001	1	C#CCOCCOCCOCCNc1nc(N2CCN(C(=O)CCCCCCCCCCNC(=O)[C@H](CCCCN)n3cc(C)nn3)CC2)nc(N2CCN(C(=O)CCCCCCCCCCNC(=O)[C@@H]([C@H](C)O)n3cc(C)nn3)CC2)n1
24789456	1	C[C@H]1CCC(=O)N([C@H](COc2ccccc2)Cc2ccccc2)CC1
661092	1	c1ccc(-n2ncc3c(N4CCN(c5ccccn5)CC4)nc(N4CCCCCC4)nc32)cc1
657611	1	N#CC(C#N)=c1ccc2c(c1)NC1(CCCCC1)N=2
660442	1	CN1CCc2c(sc3c2C(=O)NC(c2ccccn2)N3)C1
24892529	1	CCC(C)Sc1cc(-c2nc3ccc(C)cn3c2NCc2ccccc2)ccc1OC.O=C(O)C(F)(F)F
16759501	1	COC/C=C/C1=CC2=CC(=O)C(C)(OC(=O)c3cnc4ccccc4n3)C(=O)C2=CO1
15945171	1	[O-][Cl+3]([O-])([O-])[O-].c1ccc(-c2[nH]c[n+](CC3CO3)c2-c2ccccc2)cc1
3478173	1	Nc1c(O)ccc2c1C(=O)c1ccccc1C2=O
24747725	1	CCCCCCCCCCC[N+](C)(C)CC/C=C1/c2ccccc2Sc2ccc(Cl)cc21.[Br-]
16727376	1	O=c1[nH]c(Nc2ccccc2)cc2cc(Br)ccc12
4801125	1	CC1CCCC(NC(=O)COC(=O)c2cccc(S(=O)(=O)N3CCCCC3)c2)C1C
3180109	1	Cc1ccc(C(C(=O)NC2CCCC2)N(Cc2ccc3c(c2)OCO3)C(=O)c2snc(C(N)=O)c2N)cc1
3101746	1	COC(=O)c1cc(C)nc2c1C(=O)C(=O)C=C2N1CCOCC1
6023693	1	Cc1ccccc1NC1=C/C(=N\S(=O)(=O)c2ccc(C(=O)O)cc2)c2ccccc2C1=O
2126515	1	CCc1nnc(NC(=O)[C@@H](NC(=O)c2cc(OC)cc(OC)c2)C(C)C)s1
24982496	1	O.O=C(O)CCC1c2cc3c4cc2OC2Oc5cc6c(cc51)C(CCC(=O)O)c1cc5c7cc1OC(O6)c1cc6cc(c1)Oc1cc(cc(C(=O)O)c1)Oc1cc8cc(c1)C(Oc1cc(c(cc1C5CCC(=O)O)C3CCC(=O)O)OC(O4)c1cc(cc(c1)Oc1cc(cc(C(=O)O)c1)O8)Oc1cc(cc(C(=O)O)c1)Oc1cc(cc2c1)Oc1cc(cc(C(=O)O)c1)O6)O7
2199876	1	Clc1ccc(OCCSc2ncccn2)c(Br)c1
5307602	1	Cc1cc(Nc2cccc(F)c2)n2nc(C)nc2n1
3115076	1	O=C(O)c1cccc2c1NC(C(=O)O)C1CC(Sc3ccccc3[N+](=O)[O-])C(Cl)C21
653078	1	CN(C(=O)c1cccc(C#N)c1)c1nnc(C2CCCO2)s1
2259	1	O=C(O)C1=CC(=C(c2ccc(O)c(C(=O)O)c2)c2ccc(O)c(C(=O)O)c2)C=CC1=O
829764	1	CCN(CC)c1ccc2oc(=O)c(C)nc2c1
6466147	1	CCc1ccc(C(C)NC(=O)c2ccncc2)cc1
16682486	1	OCC[n+]1c2ccccc2nc2ccc(N3CCOCC3)cc21.[O-][Cl+3]([O-])([O-])[O-]
2792013	1	CCC(C(=O)O)n1cnc2scc(-c3ccc(C)c(C)c3)c2c1=O
135870952	1	CCCCn1c(N)c(N(CCOC)C(=O)CCCc2nc3ccccc3c(=O)[nH]2)c(=O)[nH]c1=O
5309223	1	CCCN(CCC)C(=O)COc1cc(=O)n(CC)c2ccccc12
24983076	1	C#CCOCCOCCOCCNc1nc(N2CCN(C(=O)CCCCCCCCCCNC(=O)[C@H]([C@@H](C)CC)n3cc(CCCCN=C(N)N)nn3)CC2)nc(N2CCN(C(=O)CCCCCCCCCCNC(=O)[C@@H](CCSC)n3cc(CCO)nn3)CC2)n1
25163022	1	C#CCOCCOCCOCCNc1nc(N2CCN(C(=O)CCCCCCCCCCNC(=O)[C@H](CCCCN)n3cc(C[C@@H](C)CC)nn3)CC2)nc(N2CCN(C(=O)CCCCCCCCCCNC(=O)[C@H]([C@@H](C)CC)n3cc(CCCCN=C(N)N)nn3)CC2)n1
1040280	1	O=[N+]([O-])c1cc(Br)c(O)c(C=Nc2ccc(N3CCOCC3)cc2)c1
851542	1	COc1cc(CNc2ccc(N3CCCC3)cc2)cc(Cl)c1OC
5730769	1	Cc1ccccc1OCCNC(=O)/C=C/c1ccccc1
3120976	1	CC1(C)CC(=O)C2=C(C1)OC(N)=C(C#N)C2c1ccccc1[N+](=O)[O-]
23723533	1	COc1cccc2c1OCC(CN1CCN(Cc3ccccc3F)C(CCO)C1)=C2
24747454	1	CC(C)N1CCN(S(=O)(=O)c2ccc3ccccc3c2)CC1.O=C(O)C(=O)O
25161400	1	C#CCOCCOCCOCCNc1nc(N2CCN(C(=O)CCCCCCCCCCNC(=O)[C@H](CO)n3cc(CCCCCN)nn3)CC2)nc(N2CCN(C(=O)CCCCCCCCCCNC(=O)[C@H](CCCN=C(N)N)n3cc(C[C@@H](C)CC)nn3)CC2)n1
5756985	1	CCC(/C=C1\Sc2ccc(OC)cc2N1CC)=C\c1sc2ccc(OC)cc2[n+]1CCCS(=O)(=O)[O-]
2885134	1	CCOc1ccc2nc3cc(NCc4ccc(OC)cc4)ccc3c(N)c2c1
12006243	1	COc1cc(NC(=O)C2=C(N3CCOCC3)/C(=C\c3ccc(N(C)C)cc3)CCC2)cc(OC)c1OC
2354936	1	CS(=O)(=O)c1ccc2nc(NC(=O)c3ccc(NS(=O)(=O)c4ccc(F)c(F)c4)cc3)sc2c1
16129778	1	O=C(OC[C@H]1O[C@@H](OC(=O)c2cc(O)c(O)c(OC(=O)c3cc(O)c(O)c(O)c3)c2)[C@H](OC(=O)c2cc(O)c(O)c(OC(=O)c3cc(O)c(O)c(O)c3)c2)[C@@H](OC(=O)c2cc(O)c(O)c(OC(=O)c3cc(O)c(O)c(O)c3)c2)[C@@H]1OC(=O)c1cc(O)c(O)c(OC(=O)c2cc(O)c(O)c(O)c2)c1)c1cc(O)c(O)c(OC(=O)c2cc(O)c(O)c(O)c2)c1
2044775	1	O=C(O)CCCN1C(=O)/C(=C/C=C/c2ccco2)SC1=S
665187	1	COC(=O)CSc1nnc([C@H](Cc2ccccc2)NC(=O)OC(C)(C)C)o1
3453217	1	O=C(O)C1Nc2c(O)cc(Cl)c([N+](=O)[O-])c2C2C=CCC12
24978565	1	C#CCOCCOCCOCCNc1nc(N2CCN(C(=O)CCCCCCCCCCNC(=O)[C@H](CCCCN)n3cc(C[C@@H](C)CC)nn3)CC2)nc(N2CCN(C(=O)CCCCCCCCCCNC(=O)[C@H](CCCCN)n3cc(C[C@@H](C)CC)nn3)CC2)n1
1980018	1	CN(C)c1ccc(N/C=C/C(=O)c2ccco2)cc1
7217786	1	COc1ccc(Cl)cc1C(=O)Nc1cccc(-c2ccc3nncn3n2)c1
5994065	1	O=C(O)CC(C(=O)O)N1C(=O)/C(=C/C=C/c2ccco2)SC1=S
25163050	1	C#CCOCCOCCOCCNc1nc(N2CCN(C(=O)CCCCCCCCCCNC(=O)[C@H](CCCN=C(N)N)n3cc(C[C@@H](C)CC)nn3)CC2)nc(N2CCN(C(=O)CCCCCCCCCCNC(=O)[C@@H]([C@H](C)O)n3cc(C)nn3)CC2)n1
12005023	1	O=C1NC(=S)S/C1=C\c1ccc(SCc2ccco2)o1
683793	1	CC(=O)Nc1cccc(NC(=O)COc2ccccc2C)c1
16192283	1	CCOC(=O)C1(Cc2cccc(OC)c2)CCN(CC=C(C)C)CC1
712768	1	Cn1cnc2c1c(=O)n(Cc1ccccc1C#N)c(=O)n2C
24981563	1	C#CCOCCOCCOCCNc1nc(N2CCN(C(=O)CCCCCCCCCCNC(=O)[C@H](CO)n3cc(CCCSC)nn3)CC2)nc(N2CCN(C(=O)CCCCCCCCCCNC(=O)[C@H](CCCN=C(N)N)n3cc(C[C@@H](C)CC)nn3)CC2)n1
5320418	1	Cc1cc(O)c(C=O)c2c1C(=O)Oc1c(CO)c(O)c3c(c1O2)C(O)OC3=O
6602716	1	Cc1cccc2c1NC(C)CC2C.Cl
1163448	1	COc1ccc(N2CCN(S(=O)(=O)c3ccc(OC)cc3)CC2)cc1
6393068	1	CC(C)C(C(=O)O)N1C(=O)/C(=C/C=C/c2ccco2)SC1=S
25163023	1	C#CCOCCOCCOCCNc1nc(N2CCN(C(=O)CCCCCCCCCCNC(=O)[C@H](CO)n3cc(CCCSC)nn3)CC2)nc(N2CCN(C(=O)CCCCCCCCCCNC(=O)[C@H]([C@@H](C)CC)n3cc(CCCCN=C(N)N)nn3)CC2)n1
25161401	1	C#CCOCCOCCOCCNc1nc(N2CCN(C(=O)CCCCCCCCCCNC(=O)[C@H](CCCN=C(N)N)n3cc(C[C@@H](C)CC)nn3)CC2)nc(N2CCN(C(=O)CCCCCCCCCCNC(=O)[C@H]([C@@H](C)CC)n3cc(CCCCN=C(N)N)nn3)CC2)n1
755971	1	CCOc1ccc(CNc2ccc(N3CCCC3)cc2)cc1
762122	1	Cc1ccc(C)n1-c1ccc(N(C)C)cc1
6603137	1	Cl.Nc1ccc(N2CCCCCC2)cc1
665493	1	COc1cccc(OC)c1-c1nn2c(-c3cc(-c4ccccc4)n[nH]3)nnc2s1
2169720	1	CCCCc1ccc(NC(=O)OC)cc1
3137773	1	Cc1ccn(CC(C)C(=O)O)n1
16196638	1	C#CCOCCOCCOCCNc1nc(N2CCOCC2)nc(N2CCN(C(=O)[C@H](CCCCN)n3cc([C@@H](N)CO)nn3)CC2)n1.Cl
4971	1	C=Cc1c(C)c2cc3[nH]c(cc4nc(cc5nc(cc1[nH]2)C(C)=C5CCC(=O)O)C(CCC(=O)O)=C4C)c(C)c3C=C
1378022	1	Cc1ccccc1-n1c(O)c(C=Nc2ccc(N(C)C)cc2)c(=O)[nH]c1=O
3245701	1	CCOC(=O)N1CCN(c2cc(NCCC(=O)O)c3c4c(onc24)-c2ccccc2C3=O)CC1
6899637	1	Fc1ccc(/C=N/NC2=Nc3cccc4cccc2c34)cc1
135903069	1	Cc1cc(-c2ccc(N=Nc3c(S(=O)(=O)[O-])cc4cc(S(=O)(=O)[O-])cc(N)c4c3O)c(C)c2)ccc1N=Nc1c(S(=O)(=O)[O-])cc2cc(S(=O)(=O)[O-])cc(N)c2c1O.[Na+]
4529300	1	C=CCn1c(O)c(C(CC)=Nc2ccc(N(C)C)cc2)c(=O)[nH]c1=O
681280	1	CCN(CC)c1ccc(N=Cc2cc(Br)ccc2O)cc1
681212	1	CCN(CC)c1ccc(N=Cc2c(C)[nH]c3ccccc23)cc1
692801	1	CCN(CC)c1ccc(N=Cc2ccc(N(CC)CC)cc2O)cc1
24793709	1	Cc1cccc(NC(=O)CCNS(=O)(=O)c2ccc3[nH]c(=O)oc3c2)c1
24747947	1	COCCNC(=O)c1cc(-c2ccccc2)nn1CC1CC(c2cccnc2)=NO1
3358745	1	Nc1cc(C(=O)O)c(N)c2c1C(=O)c1ccccc1C2=O
3217510	1	CCOC(=O)C1(C)NC(c2cccc(C)c2)C2C(=O)N(c3ccccc3)C(=O)C21
5141546	1	CN(C(=O)COC(=O)c1ccc2ccccc2n1)C1CCS(=O)(=O)C1
135437679	1	CCN(CC)c1ccc(N=C2C(=O)Nc3ccccc32)cc1
5281952	1	CC[n+]1c(/C=C/C=C/c2ccc(N(C)C)cc2)sc2ccccc21.[O-][Cl+3]([O-])([O-])[O-]
24789635	1	O=C(O)CCNc1cc(N2CCN(C(=O)c3ccco3)CC2)c2noc3c2c1C(=O)c1ccccc1-3
24983198	1	C#CCOCCOCCOCCNc1nc(N2CCN(C(=O)CCCCCCCCCCNC(=O)[C@H]([C@@H](C)CC)n3cc(CCCCCN)nn3)CC2)nc(N2CCN(C(=O)CCCCCCCCCCNC(=O)[C@H]([C@@H](C)CC)n3cc(CCCCN=C(N)N)nn3)CC2)n1
1676177	1	CN(C)c1ccc(N=C/C=C2\N(C)c3ccccc3C2(C)C)cc1
780343	1	CCOc1ccc2c(=O)c(Oc3ccccc3)c(C)oc2c1
25162994	1	C#CCOCCOCCOCCNc1nc(N2CCN(C(=O)CCCCCCCCCCNC(=O)[C@H](CCCN=C(N)N)n3cc(C[C@@H](C)CC)nn3)CC2)nc(N2CCN(C(=O)CCCCCCCCCCNC(=O)[C@@H](CCSC)n3cc(CCO)nn3)CC2)n1
3239469	1	O=C(O)CCCNc1cc(N2CCC3(CC2)OCCO3)c2noc3c2c1C(=O)c1ccccc1-3
25162926	1	C=Cc1c(C)c2cc3[nH]c(cc4nc(cc5nc(cc1[nH]2)C(C)=C5CCC(=O)[O-])C(CCC(=O)[O-])=C4C)c(C)c3C=C.[Na+]
24978588	1	C#CCOCCOCCOCCNc1nc(N2CCN(C(=O)CCCCCCCCCCNC(=O)[C@H]([C@@H](C)CC)n3cc(CCCCN=C(N)N)nn3)CC2)nc(N2CCN(C(=O)CCCCCCCCCCNC(=O)[C@H]([C@@H](C)CC)n3cc(CCCCN=C(N)N)nn3)CC2)n1
1552017	1	CN1/C(=C\C(=O)c2ccco2)C(C)(C)c2ccccc21
5052536	1	O=C(O)CCCNc1cc(N2CCN(C(=O)c3ccco3)CC2)c2noc3c2c1C(=O)c1ccccc1-3
1405560	1	C=CCn1c(O)c(C(C)=Nc2ccc(N(C)C)cc2)c(=O)[nH]c1=O
2965680	1	CC(NC(=O)c1cc(-c2cccnc2)nc2ccc(Br)cc12)C1CCCO1
5742213	1	O=c1c2ccccc2nc(/C=C/c2ccccn2)n1-c1ccccc1
2964000	1	O=C(COc1ccc(S(=O)(=O)NC2CCCCC2)cc1Cl)NCC1CCCO1
6626061	1	COc1cccc(-n2cc(C(=O)NC(C)C)c3ccccc3c2=O)c1
1006677	1	Cc1ccc(S(=O)(=O)N(C)c2ccccc2C(=O)N2CCCC2)cc1
698101	1	CC(=O)O/C(=C\c1cn(C(C)=O)c2ccccc12)C(=O)O
7514097	1	O=C(O)CCNc1ccc(NCCC(=O)O)c2c1C(=O)c1ccccc1C2=O
979664	1	CCOc1cc(CNc2ccc(N3CCCC3)cc2)cc(Cl)c1OC
1318887	1	CCOC(=O)c1cc2c(C)n(-c3ccc(N(C)C)cc3)c(C)c2cc(C(=O)OCC)c1=O
25163019	1	C#CCOCCOCCOCCNc1nc(N2CCN(C(=O)CCCCCCCCCCNC(=O)[C@H](CCCN=C(N)N)n3cc(C[C@@H](C)CC)nn3)CC2)nc(N2CCN(C(=O)CCCCCCCCCCNC(=O)[C@@H]([C@H](C)CC)n3cc(CCCCCN)nn3)CC2)n1
24398675	1	COCCCN(C(=O)c1cc2c(s1)CCCCC2)c1c(N)n(Cc2ccccc2)c(=O)[nH]c1=O
308136	1	CC(=O)Nc1ccc2[nH]c(C)cc(=O)c2c1
3700152	1	O=C(Nc1cccc2ccccc12)NC1CCCCC1O
2004750	1	Nc1c(C(=O)NCc2ccc(F)cc2)c2nc3ccccc3nc2n1CCCN1CCOCC1
741770	1	O=C(O)c1ccc2c(c1)C(=O)/C(=C\c1ccco1)C2=O
669699	1	CN(C)c1ccc(NC(=O)N2CCOCC2)cc1
4297390	1	O=C(O)CC(NC(=O)CCc1ccccc1)c1ccc(Cl)cc1
6023694	1	O=C(O)c1ccc(S(=O)(=O)/N=C2\C=C(Nc3ccccc3F)C(=O)c3ccccc32)cc1
776361	1	CCNc1ccc2noc3c2c1C(=O)c1ccccc1-3
2188632	1	CN(C)c1ccc(N/C=C/C(=O)c2ccccc2)cc1
6763	1	O=C1C(=O)c2ccccc2-c2ccccc21
3334662	1	O=C(Nc1ccc(C(F)(F)F)cc1)C1CC(=O)N(c2ccc3c(c2)OCCO3)C1
24983039	1	C#CCOCCOCCOCCNc1nc(N2CCN(C(=O)CCCCCCCCCCNC(=O)[C@H]([C@@H](C)CC)n3cc(CCCCCN)nn3)CC2)nc(N2CCN(C(=O)CCCCCCCCCCNC(=O)[C@@H]([C@H](C)CC)n3cc(CCCCCN)nn3)CC2)n1
73677	1	COc1cc(C)c2c(c1C=O)Oc1c(c(C)c(O)c3c1C(O)OC3=O)OC2=O
3218952	1	Cc1sc2nc(C(C)C)nc(SCC(=O)NC3CC3)c2c1C
804043	1	CCOc1ccc(NC(=S)Nc2ccc3nsnc3c2)cc1
8895416	1	CC(=O)c1sc(NC(=O)c2oc3ccc(F)cc3c2C)nc1C
3366808	1	CCOC1(OCC)N=C(N)C2(C#N)C(c3cccc(C)c3)C12C#N
3096032	1	Nc1cc2nsnc2cc1Br
24978587	1	C#CCOCCOCCOCCNc1nc(N2CCN(C(=O)CCCCCCCCCCNC(=O)[C@H]([C@@H](C)CC)n3cc(CCCCN=C(N)N)nn3)CC2)nc(N2CCN(C(=O)CCCCCCCCCCNC(=O)[C@@H]([C@H](C)O)n3cc(C)nn3)CC2)n1
6901505	1	O=C(O)c1ccc(N/N=C/C2=C(N3CCOCC3)/C(=C\c3ccccc3)CC2)cc1
2231744	1	Cc1ccc(NC(=O)CCc2nnc(SCC(=O)Nc3ccccc3C)n2C)cc1Cl
1557339	1	Cc1ccccc1N1C(=O)/C(=C/c2ccco2)C(=O)NC1=S
16476111	1	NS(=O)(=O)c1ccc(NC(=O)c2cccc(N3C(=O)c4ccccc4C3=O)c2)cc1
5739594	1	N#C/C(=C/c1ccc(-c2cc(C(=O)O)cc(C(=O)O)c2)o1)c1nc2ccccc2s1
6602899	1	Cl.OCCN(CCO)CC(O)Cn1c2ccccc2c2ccccc21
5282412	1	CC1(C)C(/C=C/C=C/C=C/C=C2\N(CCCCS(=O)(=O)[O-])c3ccc4ccccc4c3C2(C)C)=[N+](CCCCS(=O)(=O)[O-])c2ccc3ccccc3c21.[Na+]
6375556	1	CC(C(=O)O)N1C(=O)/C(=C/C=C/c2ccco2)SC1=S
2301472	1	O=C(NCCCO)Nc1ccc2nc(-c3ccco3)c(-c3ccco3)nc2c1
254021	1	Nc1ccc2c(c1)C(=O)C(=O)c1ccccc1-2
16196630	1	C#CCOCCOCCOCCNc1nc(N2CCN(C(=O)C([C@@H](C)CC)n3cc(C(N)CC(C)C)nn3)CC2)nc(N2CCN(C(=O)[C@H](CCC(=O)O)n3cc(C(N)[C@H](C)CC)nn3)CC2)n1.Cl
2458404	1	O=C(CSc1ncnc2scc(-c3ccccc3)c12)N1CCN(Cc2ccc3c(c2)OCO3)CC1
730421	1	NC(=O)c1cccc(NC(=S)Nc2ccccc2)c1
66541	1	Cn1ncnc2c(=O)n(C)c(=O)nc1-2
5952293	1	O=C(O)CC(C(=O)O)N1C(=O)/C(=C/c2ccc(-c3nc4ccccc4s3)o2)SC1=S
24761053	1	C[n+]1c2ccccc2nc2ccc(NCCO)cc21.[O-][Cl+3]([O-])([O-])[O-]
2997948	1	N#Cc1c(N2CCCC2)nc(N)c2c(N)nc(N3CCCC3)cc12
5702699	1	CCN1/C(=C/C=C/C=C/C=C/c2sc3ccccc3[n+]2CC)Sc2ccccc21.[I-]
3776127	1	COc1ccc(CCn2c(O)c(C=Nc3ccc(NC(C)=O)cc3)c(=O)[nH]c2=O)cc1OC
3850620	1	CCOC(=O)C1Nc2ccc(C(=O)O)cc2C2C=CCC12
66063	1	CN1CCC(OC(c2ccccc2)c2ccccc2)CC1.Cl
4343679	1	CC(=O)Nc1ccc2c(c1)C(C)(C)C(C)N2C
24978599	1	C#CCOCCOCCOCCNc1nc(N2CCN(C(=O)CCCCCCCCCCNC(=O)Cn3cc(CCCCCN)nn3)CC2)nc(N2CCN(C(=O)CCCCCCCCCCNC(=O)[C@H]([C@@H](C)CC)n3cc(CCCCN=C(N)N)nn3)CC2)n1
24983074	1	C#CCOCCOCCOCCNc1nc(N2CCN(C(=O)CCCCCCCCCCNC(=O)Cn3cc(CCCCCN)nn3)CC2)nc(N2CCN(C(=O)CCCCCCCCCCNC(=O)[C@@H](CCC(=O)O)n3cc(CCCCCN)nn3)CC2)n1
9550113	1	CCCC1=NN2C(=N)/C(=C\c3ccc(SCc4ccco4)o3)C(=O)N=C2S1
2416879	1	O=C1/C(=C/c2ccc(C(=O)O)cc2)CCC/C1=C\c1ccc(C(=O)O)cc1
4014739	1	Cc1[nH]c2c(C)cccc2c1CCNS(=O)(=O)c1cc([N+](=O)[O-])ccc1Cl
24978594	1	C#CCOCCOCCOCCNc1nc(N2CCN(C(=O)CCCCCCCCCCNC(=O)[C@H]([C@@H](C)CC)n3cc(CCCCCN)nn3)CC2)nc(N2CCN(C(=O)CCCCCCCCCCNC(=O)[C@@H](CCSC)n3cc(CCO)nn3)CC2)n1
12004742	1	CCC(/C=C1\Sc2ccc(OC)cc2N1CCO)=C\c1sc2ccc(OC)cc2[n+]1CCO.[Cl-]
24983199	1	C#CCOCCOCCOCCNc1nc(N2CCN(C(=O)CCCCCCCCCCNC(=O)Cn3cc(CCCCCN)nn3)CC2)nc(N2CCN(C(=O)CCCCCCCCCCNC(=O)[C@@H](CCSC)n3cc(CCO)nn3)CC2)n1
2467360	1	O=C(CSc1nnc(-c2ccc(OC(F)F)cc2)o1)NCc1cccs1
443939	1	COc1cccc2c1C(=O)c1c(O)c3c(c(O)c1C2=O)C[C@@](O)(C(=O)CO)C[C@@H]3O[C@H]1C[C@H](N)[C@H](O)[C@H](C)O1.Cl
2190927	1	CN(C)c1ccc(N/C=C/C(=O)c2ccc(F)cc2)cc1
5923363	1	CC1=C(C#N)C(=O)N(C2CCS(=O)(=O)C2)C(=O)/C1=C\c1ccco1
3606210	1	CCOC(=O)C(C)Sc1ncc(-c2ccccc2)cn1
969565	1	COc1ccc(-c2nc(N)n(C(=O)c3cccs3)n2)cc1
1798249	1	COc1cc(CNc2ccc(N3CCCC3)cc2)ccc1OCc1ccccc1F
6027441	1	N#C/C(=C\c1ccc([N+](=O)[O-])o1)C(=O)Nc1ccc(F)cc1
1203912	1	O=C(O)c1ccc2c(c1)[C@@H]1C=CC[C@@H]1[C@H](c1ccccn1)N2
6621129	1	CCc1ccccc1NC(=S)N(CCCN1CCOCC1)Cc1ccccn1
6393804	1	O=C1/C(=C/C=C/c2ccco2)SC(=S)N1NS(=O)(=O)c1ccccc1
1251421	1	COc1ccc(C(=O)N(C)c2c(C)n(C)n(-c3ccccc3)c2=O)cc1OC
2494887	1	Cc1cccc(NCC(=O)Nc2cccc(C)c2C)c1C
24980591	1	COC(=O)c1ccc(CNC(=O)CNC(=O)c2sc3ccccc3c2Cl)cc1
24978583	1	C#CCOCCOCCOCCNc1nc(N2CCN(C(=O)CCCCCCCCCCNC(=O)Cn3cc(CCCCCN)nn3)CC2)nc(N2CCN(C(=O)CCCCCCCCCCNC(=O)[C@H]([C@@H](C)CC)n3cc(CCCCCN)nn3)CC2)n1
10860295	1	CNc1ccc2nc3ccccc3[n+](C)c2c1.[O-][Cl+3]([O-])([O-])[O-]
659413	1	O=C1c2ccccc2-c2onc3ccc(NCc4ccco4)c1c23
247228	1	O=C(Nc1cccc(-c2nc3ccccc3[nH]2)c1)c1ccc(C(=O)Nc2cccc(-c3nc4ccccc4[nH]3)c2)cc1
6902581	1	C=CCN=c1scc(-c2ccccc2)n1/N=C/c1ccccn1
213329	1	Cc1ccc(C)n1-c1cccc(C(=O)O)c1
2264590	1	O=C1/C(=C/c2ccc(O)cc2)SC(=S)N1Cc1cccnc1
1216145	1	O=[N+]([O-])c1cc(Cc2ccccc2)cc(C=Nc2ccc(N3CCOCC3)cc2)c1O
24871268	1	CC[N+](C)(CC)CCC[n+]1c(-c2ccccc2)c2cc(N)ccc2c2ccc(N)cc21.[I-]
597363	1	CC(=O)Nc1cc(OC(C)=O)c2nonc2c1OC(C)=O
24789562	1	Cc1cccc(CN2C(=O)/C(=C\c3ccc(C(=O)NCCCN4CCN(C)CC4)cc3)Oc3ccccc32)c1
9549698	1	CC1=NN(c2cccc(C(=O)O)c2)C(=O)/C1=C\C=C\c1ccco1
664864	1	Cc1ccc(S(=O)(=O)N2CCN(c3nc(C(C)C)c4c(c3C#N)CC(C)(C)OC4)CC2)cc1
25162997	1	C#CCOCCOCCOCCNc1nc(N2CCN(C(=O)CCCCCCCCCCNC(=O)[C@H](CCCCN)n3cc(C)nn3)CC2)nc(N2CCN(C(=O)CCCCCCCCCCNC(=O)[C@@H]([C@H](C)CC)n3cc(CCCCCN)nn3)CC2)n1
24978566	1	C#CCOCCOCCOCCNc1nc(N2CCN(C(=O)CCCCCCCCCCNC(=O)[C@H](CCCCN)n3cc(C[C@@H](C)CC)nn3)CC2)nc(N2CCN(C(=O)CCCCCCCCCCNC(=O)[C@H](CCCN=C(N)N)n3cc(C[C@@H](C)CC)nn3)CC2)n1
65348	1	COc1cccc2c1C(=O)c1c(O)c3c(c(O)c1C2=O)C[C@@](O)(C(=O)CO)C[C@@H]3O[C@H]1C[C@H](N)[C@@H](O)[C@H](C)O1.Cl
906542	1	Cn1nc(-c2ccccn2)nc2c(=O)n(C)c(=O)nc1-2
1427493	1	COc1ccc(-c2coc3c(CN4CCCCC4)c(O)c(CN4CCCCC4)c(O)c3c2=O)cc1
1072934	1	CC(C)N(C(=O)Nc1ccc2nsnc2c1)C(C)C
16682517	1	CCN(CC)CCOC(=O)c1ccc(N/C=C(/C#N)c2nc(-c3ccc(OC)c(OC)c3)cs2)cc1
5351121	1	N/C(=N\OC(=O)COc1ccc(Br)cc1Cl)c1ccccn1
647501	1	CCn1nc(-c2ccccc2)nc2c(=O)n(C)c(=O)nc1-2
5922856	1	O=C(NN1C(=O)/C(=C/C=C/c2ccco2)SC1=S)c1ccncc1
1608674	1	COc1ccc(OC)c(N2C(=O)/C(=C/c3ccco3)C(=O)NC2=S)c1
4120603	1	COc1ccc(CCNC(=O)C2c3ccccc3C(=O)N2CCC(C)C)cc1OC
1798295	1	COc1cc(CNc2ccc(N3CCCC3)cc2)ccc1OCc1ccccc1
854635	1	c1coc(-c2nc(-c3ccco3)c(-c3ccco3)nc2-c2ccco2)c1
24820068	1	CC(=O)c1cccc(NC(=O)NNC(=O)c2ccc3ccccc3c2)c1
2133793	1	O=S(=O)(Nc1cc(Sc2cccc3cccnc23)c(O)c2ccccc12)c1ccc(F)cc1
2554659	1	c1coc(-c2nnc(-c3ccco3)nn2)c1
2229869	1	COc1ccc(C(=O)Nc2ccc3c(c2)C(=O)NC3=O)cc1
1075778	1	COc1ccc(Cc2nnc(NC(=O)Nc3ccccc3)s2)cc1OC
649546	1	COc1ccc(-c2ccc(Nc3ccc(S(=O)(=O)N4CCCC4)cc3)nn2)cc1OC
3704436	1	O=[N+]([O-])c1ccccc1NCCNc1ncc(C(F)(F)F)cc1Cl
2083663	1	O=C(Nc1ccc(S(=O)(=O)Nc2nccs2)cc1)c1ccc(N2C(=O)c3ccccc3C2=O)cc1
3192796	1	O=C(Cn1nnc(-c2ccccc2NC(=O)c2ccccc2)n1)Nc1ccc2c(c1)OCCO2
3176094	1	CC(C)CNC(=S)N(Cc1ccco1)Cc1cc2cc3c(cc2[nH]c1=O)OCCO3
2958807	1	NS(=O)(=O)c1ccc(NC(=S)NC(=O)c2ccc3c(c2)OCO3)cc1
2397780	1	Cc1nn(Cc2ccccc2)c(Cl)c1C(=O)OCC(=O)Nc1cccc2ccccc12
135584543	1	COc1ccc(NC(=O)CSc2nc3nc(C)cc(C)c3c(=O)[nH]2)cc1
3807270	1	COC(=O)C(C(=O)OC)c1ccc(NC(=O)c2cccc(Cl)c2)cc1
6876434	1	CCn1cc(/C=N/NC(=O)c2cc3c(ccc4ccccc43)o2)c2ccccc21
2873328	1	O=C(Nc1cccc(Cl)c1Cl)C1CC(=O)N(c2ccc(Br)cc2)C1
135521437	1	COC(=O)c1ccc2c(=O)[nH]c(CSc3nc(-c4ccc(F)cc4)cs3)nc2c1
2830804	1	O=c1c(C(c2ccccc2)c2c(O)sc3ccccc3c2=O)c(O)sc2ccccc12
4557247	1	Cc1cc(C)cc(NC(=O)Cn2c(-c3ccccc3Cl)nc3ccccc32)c1
2380888	1	O=C(CSc1n[nH]c(=O)[nH]c1=O)NC1CC1
16193924	1	NS(=O)(=O)c1ccc(CCNC(=O)C2CCC(CNS(=O)(=O)c3ccc(Br)s3)CC2)cc1
6874395	1	O=C(N/N=C/c1ccc(COc2ccc(Br)cc2)o1)c1ccco1
2997583	1	CC1(c2ccccc2)NC(=O)N(CCN2C(=O)c3ccccc3C2=O)C1=O
22333945	1	CCc1ccc(NC(=O)CCCNC(=O)Cn2cnc3sc(C)c(C)c3c2=O)cc1
6888970	1	O=C(N/N=C/c1cccc([N+](=O)[O-])c1)c1cc(-c2ccc3c(c2)OCO3)n[nH]1
1635288	1	Cc1ccc(N2CCN(C3=NC(=O)/C(=C\c4cn[nH]c4-c4ccccc4)S3)CC2)cc1
677049	1	O=C(CSc1nc2ccccc2s1)Nc1nccs1
3366877	1	O=C(CCCCCNc1nc(=S)[nH]c2ccccc12)NCCc1ccc(Cl)cc1
2085772	1	COC(=O)c1cc(NC(=O)Cn2c(=O)oc3ccccc32)cc(C(=O)OC)c1
2450652	1	Cc1ccc(S(=O)(=O)N2CCN(C(=S)NCCc3ccccc3)CC2)cc1
2237034	1	COc1ccc(CNc2nc(NCc3ccc(OC)cc3)n(C(C)=O)n2)cc1
2866203	1	COc1ccc(N=Cc2c(O)n(-c3ccc(OC)cc3)c(=O)c3ccccc23)cc1
6079611	1	COc1ccccc1CNC(=O)c1ccc2nc3[nH]c4ccccc4c3nc2c1
6493294	1	CCOC(=O)c1sc(NC(=O)COc2ccc3c(c2)OCO3)nc1C
1011147	1	COc1ccc(C(=O)Nc2cccc(NC(=O)c3ccc(OC)cc3OC)n2)c(OC)c1
2385410	1	NS(=O)(=O)c1ccc(NC(=O)COC(=O)/C(=C/c2cccs2)c2cccs2)cc1
7202836	1	O=C(Nc1nc2cc3c(cc2s1)OCCO3)c1ccc(N2C(=O)CCC2=O)cc1
6469913	1	COc1ccc(CNC(=O)Nc2ccc(C)cc2C)cc1
5826369	1	CCOc1ccc(NC(=O)C(=O)N/N=C\c2ccc(CNS(=O)(=O)c3ccccc3)o2)cc1
4293555	1	CN1CCN(c2nc(-c3ccccn3)nc3ccccc23)CC1
3160911	1	Cc1c(C#N)c(N)nc2c3c(sc12)NC(=O)CC3c1ccccc1
4091977	1	COC(=O)c1ccc2c(=O)n(CCCCCC(=O)NCc3ccc4c(c3)OCO4)c(=O)[nH]c2c1
5454921	1	C/C(=N\NC(=O)c1c(Br)c(C)nn1C)c1ccc(NC(=O)c2ccoc2C)cc1
24687714	1	COc1ccc2oc(C(=O)OCC(=O)Nc3cc(S(=O)(=O)N4CCOCC4)ccc3C)c(C)c2c1
1073562	1	N#C/C(=C\c1cn(Cc2ccccc2F)c2ccccc12)C(=O)NCc1ccco1
20846801	1	O=C(N/N=C/c1cccs1)c1cccc(NC(=O)c2ccc(Cl)cc2)c1
5342516	1	Cc1cccc(OCC(=O)N/N=C\C=C\c2ccc3c(c2)OCO3)c1C
12005165	1	CCCN1Cc2cccc(C(=O)Nc3ccc(-c4nc5ccccc5[nH]4)cc3)c2C1=O
3609290	1	COC(=O)C1CSC(C(=O)OC)N1C(=O)Nc1ccccc1
2107050	1	CC(=O)c1ccc(N2CCN(C(=S)Nc3cccc(Cl)c3)CC2)cc1
899193	1	COc1ccc(C(=O)Nc2ccc(C3(C#N)CCCC3)cc2)cc1
16195337	1	COc1ccc2nc(NC(=O)CC3Oc4ccccc4NC3=O)sc2c1
1725562	1	Cc1ccccc1NC(=O)CN1C(=O)N/C(=C\c2ccc(N3CCOCC3)c(F)c2)C1=O
1475428	1	COc1ccc(CNS(=O)(=O)NCc2ccc(C)cc2)cc1
1239901	1	O=C(NN1C(=O)c2ccc3c4c(ccc(c24)C1=O)CC3)c1ccc(Br)cc1
5137918	1	Cc1ccc(NC(=O)CCCN2C(=O)c3cccc4cccc(c34)C2=O)cc1
6883686	1	O=C(CN(c1ccccc1)S(=O)(=O)c1ccccc1)N/N=C/c1ccc(OC2CSC2)cc1
654287	1	COc1cccc(NC(=O)C2CCCN(S(=O)(=O)c3ccc(-n4cnnn4)cc3)C2)c1
2366935	1	O=C(COC(=O)/C=C/c1ccccc1)Nc1cc(C(F)(F)F)ccc1N1CCOCC1
1432744	1	CCc1nnc(NC(=O)CSc2ccc(-c3nc4ccccc4[nH]3)cn2)s1
2319752	1	NS(=O)(=O)c1ccc(NC(=O)/C=C/c2cccs2)cc1
2810155	1	Cc1ccccc1C(=O)Nc1nc2c(C)csc2c(=O)s1
984329	1	O=C(CNS(=O)(=O)c1cccc(Cl)c1)Nc1ccc(-c2nc3ccccc3s2)cc1
5770444	1	COc1ccc2[nH]c3nc(SCc4nnc(-c5ccc(C)cc5)o4)nnc3c2c1
3196620	1	COc1ccc(N(C(=O)c2ccco2)C(C(=O)NC2CCCC2)c2cccs2)c(OC)c1
136951	1	COc1ccc(NC(=O)Nc2ccc(OC)cc2)cc1
1557000	1	COc1ccc(/C=C2\SC(=O)N(CC(=O)NNC(=O)c3ccccc3O)C2=O)cc1
667115	1	Nc1c(C(=O)Nc2ccccc2)sc2nc(-c3ccco3)ccc12
644789	1	COc1ccc(C(=O)Nc2ccccc2-c2nnn(CC(=O)NCc3ccco3)n2)cc1
2484700	1	CCOC(=O)Nc1ccc2c(COC(=O)CN(C)S(=O)(=O)c3ccc(C)cc3)cc(=O)oc2c1
306644	1	COc1ccc(NC(=O)c2ccc(C(=O)Nc3ccc(OC)cc3OC)cc2)c(OC)c1
3216929	1	COCCN(Cc1cc2cc(C)cc(C)c2nc1Cl)C(=O)Nc1ccccc1
7256141	1	COc1ccc(/C=C2/NC(=O)N(CC(=O)Nc3cccc(C)c3)C2=O)cc1O
1317157	1	CCC(=O)Nc1ccc(Cl)c(NC(=S)NC(=O)COc2ccc(Cl)cc2)c1
2966346	1	CCC(=O)Nc1ccc(C(=O)Nc2ccc3c(c2)C(=O)N(CC2CCCO2)C3=O)cc1
16196760	1	CN(C)c1cc[n+](/C(C(=S)Nc2ccc(SC(F)F)cc2)=C(/[O-])c2ccccc2)cc1
6902783	1	CCNC(=S)N/N=C/c1c(C)nn(-c2cccc(Cl)c2)c1Cl
2815209	1	c1ccc(-c2csc(-c3ccc(-c4csnn4)cc3)n2)cc1
1176243	1	CCOc1ccc2nc(SCC(=O)NNC(=O)c3ccco3)c(C)cc2c1
135549849	1	COC(=O)C(=N/Nc1ccccc1C(=O)OC)/C(C)=N/O
1077887	1	COc1cc(NC(=O)c2ccc(Br)cc2)c(OC)cc1NC(=O)c1ccccc1
5308327	1	COc1ccc(OC)c(NC(=O)CS(=O)(=O)Cc2nc(-c3ccccc3C)oc2C)c1
4073618	1	Cc1ccc(N2C(=O)CC(N(CCc3ccccc3)C(=S)Nc3ccc(N(C)C)cc3)C2=O)cc1
2102674	1	Cc1cc(NC(=O)CSc2nc3ccccc3c(=O)n2Cc2ccc(F)cc2)no1
2936409	1	Cc1cccc(NC(=O)c2ccc(N3C(=O)C4C5C=CC(C6CC56)C4C3=O)cc2)c1
1229516	1	Cn1cc(/C=C2/SC(=O)N(CC(=O)Nc3ccc4c(c3)OCO4)C2=O)c2ccccc21
4459696	1	Cc1ccc(NC(=O)CSc2nnc(NC(=O)c3ccc(S(=O)(=O)N4CCOCC4)cc3)s2)cc1
24686908	1	CCCCN(C(=O)c1cc(CC)c(C)s1)c1c(N)n(CC(C)C)c(=O)[nH]c1=O
1485286	1	Cc1ccc(C(=O)NNC(=O)c2cc3cc4ccccc4nc3s2)cc1
135450627	1	COc1cccc(N2CC(O)=C(c3nc4ccccc4c(=O)[nH]3)C2=N)c1
9550126	1	CCOC(=O)N1CCN(S(=O)(=O)c2ccc(F)c(C(=O)Nc3cccc(Cl)c3C)c2)CC1
135512174	1	O=c1[nH]c(CN2CCN(S(=O)(=O)c3ccc4ccccc4c3)CC2)nc2ccccc12
15944851	1	Cc1cc(NC(=O)CSc2nnc(NC(=O)C3CC(=O)N(c4ccccc4)C3)s2)no1
1582676	1	CC(=O)Nc1ccc(S(=O)(=O)Nc2ccc(S(=O)(=O)Nc3ncccn3)cc2)cc1
3124009	1	COc1ccc(C(=O)Nc2ccccc2C(=O)NC(Cc2ccc(O)cc2)C(=O)NNC(=O)c2ccccc2)cc1
2668983	1	CN(C(=O)COC(=O)c1cc2c(s1)CCCCC2)c1ccccc1
12004839	1	CCOC(=O)c1ccc(N2CCN(c3ccc(F)cc3)CC2)c(NC(=O)Nc2cccc(OC)c2)c1
1151719	1	COc1ccc(C(=O)NNC(=O)CSc2nnc(COc3ccc4ccccc4c3)n2C)cc1
898321	1	COc1ccc(-c2csc(N3C(=O)CNC3=S)n2)cc1
778164	1	CC(=O)c1cc(C)ccc1OC(=O)c1cccc2nc(C)oc12
777365	1	O=C1NC(=S)N(c2ccc(F)cc2)C(=O)/C1=C/c1ccco1
23640978	1	O=C1[C@H]2[C@@H](C(=O)N1C1CCCCC1)[C@@H](c1ccc(F)cc1)N1C(=O)N(c3cccc(F)c3)C(=O)[C@@]21Cc1ccccc1
5310148	1	COc1ccc(-c2cn3c(C)c(C(=O)NCc4ccc5c(c4)OCO5)sc3n2)cc1
935459	1	O=C(NCC(F)(F)F)Nc1cccnc1
24982558	1	CC(=O)Nc1ccc(NC(=O)C(C)OC(=O)c2oc3ccccc3c2C)cc1
12005074	1	COc1ccccc1Nc1ncc(C(=O)Nc2ccc(OC)c(OC)c2)c2ccccc12
12004940	1	Cc1cccc(NC(=O)Cn2c(=O)n(Cc3ccccc3)c(=O)c3c(C)c(C)sc32)c1
24979178	1	CCc1noc(C)c1C(=O)Nc1cc(S(=O)(=O)N2CCOCC2)ccc1OCC(F)(F)F
3238390	1	COc1cc(-c2nc3n(n2)C(c2cccc(OC)c2OC)C2=C(CCCC2=O)N3)cc(OC)c1OC
1416738	1	O=C(NC(=S)Nc1ccc(S(=O)(=O)N2CCCCCC2)cc1)c1cccs1
24654209	1	O=C(COC(=O)c1cc(Cl)ccc1Cl)Nc1ccc2[nH]c(=O)[nH]c2c1
3134427	1	Cc1ccc2c(c1)N1C(=O)c3ccccc3C1C1=C(CC(C)(C)CC1=O)N2
658989	1	COc1cc(Cn2c(N)c(C#N)c3nc4ccccc4nc32)cc(OC)c1
2214803	1	Cc1ccc(-c2nc3ccccc3[nH]2)cc1NC(=O)c1sc2cc(Cl)ccc2c1Cl
1506893	1	O=C(COc1ccccc1)NCc1ccc(-n2cccc2)cc1
16027935	1	COc1cccc(N2CCN(S(=O)(=O)c3ccc(-c4cnc(C5CC5)o4)cc3)CC2)c1
940652	1	O=C1N=C(N2CCCCC2)S/C1=C\c1cn[nH]c1-c1ccccc1
6457206	1	COc1cc(CNC2CCCCCCC2)cc(Cl)c1OC.Cl
2965901	1	O=C(CNC(=O)c1ccco1)NCC(=O)OCc1ccc(C(=O)Oc2ccc(Cl)cc2)cc1
4460240	1	COc1ccc(NC(=O)Nc2ccccc2F)cc1Cl
1180751	1	O=C(Nc1cccnc1)c1sc(Nc2ccccc2)nc1-c1ccccc1
2477922	1	CC(C)CNC(=O)NC(=O)COC(=O)c1cc(F)cc(F)c1
644686	1	COCCn1c(Cc2ccccc2)nnc1SCC(=O)NC(C)C
649312	1	CCn1nnc(-c2ccccc2NC(=O)c2cccc(-n3cnnn3)c2)n1
666440	1	Cc1ccc(-c2nn3c(-c4ccco4)nnc3c3ccccc23)cc1S(=O)(=O)NCC1CCCO1
718437	1	COC(=O)CSc1nc(C)c2ccc(OC)cc2n1
4690281	1	COc1ccccc1CNC(=O)C1CCN(C(=O)N(C)C)CC1
980180	1	CCCC(=O)Nc1ccc2nc(SCC(=O)Nc3ccc(N4CCOCC4)c(Cl)c3)sc2c1
2380760	1	COc1cc(NC(=O)COC(=O)/C=C/c2ccccc2Cl)cc(OC)c1
19798339	1	COc1ccc(NC(=O)NCc2ccc3c(c2)OCO3)c(OC)c1
2944700	1	O=C(COc1ccc2c(c1)OCO2)Nc1ccc2c(c1)oc1ccccc12
1140059	1	COc1ccc(-n2c(SCC(=O)Nc3ccccc3)nnc2-c2ccc(NS(=O)(=O)c3ccc(C)cc3)cc2)cc1
2945846	1	O=C(NCC1OCCc2ccccc21)c1ccc(NC(=O)c2ccc(Cl)cc2Cl)cc1
2204949	1	COc1cc(NC(=S)NC(=O)c2cc(C)cc(C)c2)ccc1NC(=O)c1cccs1
1273132	1	O=C(Nc1cccc(NC(=O)c2cccs2)c1)c1ccc(Br)cc1
2048505	1	Cc1ccc2c(c1)[nH]c1c(=O)n(Cc3ccco3)cnc12
6050117	1	COc1ccc(/C=C/C(=O)c2c(C)nc3ccccn23)cc1
1342894	1	O=C(NC(=S)Nc1ccc(NC(=O)c2cccs2)cc1)c1cc2ccccc2o1
3195571	1	Cc1ccc(S(=O)(=O)N2CCCC(C(=O)Nc3ccc(NC(=O)c4ccccn4)cc3)C2)cc1
2186725	1	COc1ccc(NC(=O)c2cccc(NC(=O)c3ccccc3)c2)cc1
1331611	1	O=C(Nc1cccc(C(F)(F)F)c1)c1ccc2nc(-c3ccco3)c(-c3ccco3)nc2c1
9555944	1	NC(=S)N/N=C/c1ccc(/C=N/NC(N)=S)cc1
1297668	1	Cc1cccc(C)c1NC(=O)COc1ccc2c(C)c(Cc3ccccc3)c(=O)oc2c1
9564324	1	COC(=O)COc1ccc(/C=N/NC(=O)c2ccc(N(Cc3ccccc3)S(C)(=O)=O)cc2)cc1
1623368	1	Cc1cccc(N2CCN(C3=NC(=O)/C(=C\c4cn[nH]c4-c4ccccc4)S3)CC2)c1
2418391	1	CCCn1c(C)cc(/C=C(\C#N)C(=O)OCC(=O)Nc2cccc(OC)c2)c1C
6898403	1	COC(=O)c1ccc(COc2ccccc2/C=N/NS(=O)(=O)c2ccc(C)cc2)cc1
2207359	1	O=C(NNC(=O)c1ccc(NC(=O)c2ccccc2)cc1)c1ccc(F)cc1
24819746	1	Cc1ccc(S(=O)(=O)N(C)C)cc1NC(=O)COC(=O)CCCOc1ccccc1
2944240	1	CCC(=O)N1CCN(c2ccccc2NC(=O)COc2ccc(C(C)C)cc2)CC1
4870211	1	CC(=O)Nc1ccc(NC(=O)c2cc(=O)c3cc(C)c(C)cc3o2)cc1
12005311	1	CCCCN(CC)CCNC(=O)CN1C(=O)COc2ccc(S(=O)(=O)N3CCCC3)cc21
702038	1	N#Cc1c2c(c(NCc3cccnc3)n3c1nc1ccccc13)CCC2
25102455	1	CCOC(=O)[C@H]1[C@H]2COc3ccc(Cl)cc3[C@@H]2N2C(=O)c3ccc(Cl)cc3NC(=O)[C@@]12C
5925253	1	COc1cc(C(=O)NNC(=S)NC(=O)/C=C/c2ccccc2)cc(OC)c1OC
2825037	1	C=CCNC(=S)NNC(=O)c1ccccc1
2108163	1	CCOC(=O)c1cc(-c2ccccc2)sc1NC(=O)COC(=O)c1cccc(S(N)(=O)=O)c1
1944711	1	Cc1cccc(-c2noc(CCC(=O)Nc3ccc(C(N)=O)cc3)n2)c1
2370402	1	CCOc1cc(C(=O)OCC(=O)c2c(N)n(C)c(=O)n(C)c2=O)cc(OCC)c1OCC
3479316	1	CC1=CC(=C(C#N)C#N)C=C(C)N1CCN1CCN(C(=O)Nc2ccc(Cl)c(Cl)c2)CC1
16193334	1	Nc1c(C(=O)NCc2ccc3c(c2)OCO3)nnn1Cc1cccc(F)c1
977032	1	O=C(Nc1cccc(-c2nnc(-c3ccccc3)o2)c1)C1CCCCC1
135497974	1	Cc1cc(C(=O)N/N=C/c2cc(N=Nc3ccccc3)ccc2O)n[nH]1
12004901	1	O=C(Nc1cc(F)cc(F)c1)c1ccc(NCCc2ccccc2)c([N+](=O)[O-])c1
5677350	1	N#Cc1ccc(N2Cc3ccccc3/C2=N/C(=O)Nc2ccc(Cl)cc2)cc1
15945459	1	COc1ccc(-c2nc(SCC(=O)Nc3nccs3)c(-c3ccc(Cl)cc3)[nH]2)cc1
18109116	1	CCOc1ccc2oc(C(=O)NNC(=O)c3ccccc3O)c(C)c2c1
5988153	1	COc1ccc(NS(=O)(=O)c2cc(NC(=O)/C=C/c3cccs3)ccc2N2CCOCC2)cc1
2546296	1	Cc1ccc2nc(-c3ccc(NC(=O)CN(C)S(=O)(=O)c4ccccc4)cc3)sc2c1
7386060	1	Nc1c(C(=O)Nc2ccc3c(c2)OCCO3)nnn1Cc1cccc(Cl)c1
3255312	1	CC(=O)Nc1ccc(NC(=O)Cc2sc(-c3cccnc3)nc2-c2ccc(C)cc2)cc1
2122192	1	CC(C)Cn1c(N)c(C(=O)CSc2ccc3c(c2)OCCO3)c(=O)n(C)c1=O
2579414	1	CS(=O)(=O)c1ccc(Cl)c(NC(=O)Cc2c(F)cccc2Cl)c1
1392245	1	COc1ccc2nc(NC(=O)c3cccc(-c4cc5ccccc5oc4=O)c3)sc2c1
645586	1	CC1CCN(S(=O)(=O)c2ccc(-c3nnc(SCc4cccnc4)o3)cc2)CC1
15994429	1	CCCCCNC(=O)C1CCC(Cn2c(=S)[nH]c3ccccc3c2=O)CC1
3173956	1	Cc1ccc2[nH]c(=O)c(CN(Cc3cccs3)C(=S)NCC3CCCO3)cc2c1
6484583	1	COc1ccc(S(=O)(=O)N2CCOCC2)cc1NC(=O)c1ccc(Cl)cc1
1213087	1	COc1ccc(-c2csc(N3C(=N)SCC3=O)n2)cc1
3921069	1	Cc1ccccc1OCc1nnc(SCC(=O)Nc2ccc3nc(SCC(=O)Nc4ccccc4)sc3c2)n1C
2393360	1	COc1ccc(Nc2nnc(SCC(=O)c3cc4ccccc4o3)s2)cc1
1293053	1	Cc1cc(Cl)ccc1OCC(=O)NC(=S)Nc1ccccc1N1CCOCC1
2535806	1	O=C(CNC(=O)c1ccc(-c2ccccc2)cc1)OCc1c(F)cccc1Cl
3236222	1	CN(C)c1ccc(NC(=O)Cn2c(=O)n(Cc3ccccc3)c(=O)c3ccccc32)cc1
20855583	1	Cc1cc(C)cc(NC(=O)C2CCCN(S(=O)(=O)c3c(C)noc3C)C2)c1
1507365	1	COc1ccccc1NC(=O)Cn1c2ccccc2c2nc3n(c(=O)c21)CCS3
5760273	1	CN(C)c1ccc(/C=C(\C#N)C(=O)NCc2ccco2)cc1
742820	1	NS(=O)(=O)c1ccc(NC(=O)/C=C/c2ccc3c(c2)OCO3)cc1
2591156	1	Cc1cc(NC(=O)CSc2nc(-c3ccc(F)cc3)cs2)no1
15944938	1	CC(=O)c1ccc(NC(=O)COC(=O)c2c3c(nc4ccccc24)/C(=C\c2cccs2)CCC3)cc1
2866618	1	O=C1CC(SC(=NCc2ccc3c(c2)OCO3)Nc2ccccc2)C(=O)N1c1ccccc1
4271663	1	Cc1ccc(C(=O)NC(=S)Nc2ccc3[nH]c(=O)[nH]c3c2)cc1
3557584	1	COC(=O)c1cn(NC(=O)Cc2ccc(Cl)c(Cl)c2)c(=O)c2ccccc12
4797029	1	COc1ccc(Cl)cc1NC(=O)CN1CCN(S(=O)(=O)c2ccc(F)cc2)CC1
1081765	1	Cc1ccc(-c2nnn(CC(=O)NCCc3ccc4c(c3)OCO4)n2)cc1
2092670	1	Cc1csc(NC(=O)COc2ccc3c(C)cc(=O)oc3c2)n1
2196118	1	COc1ccc(C(=O)NC(=S)N(C)Cc2ccccc2)cc1Br
1894994	1	O=C(c1ccccc1)c1ccc2nc(-c3ccc(NC(=O)c4ccccc4Br)cc3)[nH]c2c1
2676980	1	O=C(Cn1cnc2ccccc2c1=O)Nc1nc2ccccc2s1
2764134	1	N#CCC(=N)N1CCN(c2cccc(Cl)c2)CC1
646096	1	Cc1ccc2c(c1)C1C=CCC1C(C(=O)O)N2
2423140	1	COc1ccccc1N(C)S(=O)(=O)c1ccc(C(=O)NC2=NCCS2)cc1
1004339	1	COc1ccc(-c2ccc(C#N)c(SCC(=O)NCc3ccco3)n2)cc1OC
8438517	1	O=C(NCCc1ccc(F)cc1)c1ccc2c(=O)n3c(nc2c1)CCC3
24982004	1	CCN(CC(=O)Nc1ccccc1OC)C(=O)c1cc(-c2ccccc2)nn1-c1ccccc1
2123860	1	CCn1c(CSc2nnc3ccccn23)nc2cc(C(=O)O)ccc21
5290955	1	CN1C(=O)N(C)C2(c3ccccc3)Nn3c(s/c(=C/c4ccco4)c3=O)=NC12c1ccccc1
3231099	1	CCc1nnc(NC(=O)CSc2ccc(-c3nc4ccc(C)cc4[nH]3)cn2)s1
2530567	1	CCOC(=O)/C=c1\s/c(=C\c2ccc(C)cc2)c(=O)n1CC(=O)NCc1ccco1
135590194	1	CC(=O)Nc1ccc(/C=C/c2nc(-c3ccccc3O)n[nH]2)cc1
7202588	1	COC(=O)c1ccc2nc(NC(=O)CCS(=O)(=O)c3ccccc3)sc2c1
3798879	1	CCOc1ccc(C(=O)NC(=S)Nc2ccc(NC(=O)C(C)C)cc2)cc1[N+](=O)[O-]
754129	1	CCOC(=O)C1CCN(Cc2ccc(Cl)c(Cl)c2)CC1
135437622	1	COc1ccc(/C(C)=N\Nc2nc(-c3ccccc3)cc(=O)[nH]2)cc1
2564184	1	COCCOC(=O)c1c(NC(=O)CNc2ccc(C)c(F)c2)sc(C(N)=O)c1C
1452563	1	COc1ccccc1C(=O)Nc1ccc(-c2nnn(CC(=O)NCc3ccco3)n2)cc1
2050103	1	CNc1cncc(C(=O)O)c1
15945306	1	CCOc1ccc(C(=O)N[C@H](C(=O)Nc2cccc(S(=O)(=O)N3CCCCC3)c2)C(C)C)cc1
9547773	1	COc1cccc(-c2cc(=O)c3cc(NC(=O)c4ccc(N(C)C)cc4)ccc3[nH]2)c1
2347772	1	COc1ccc(OC)c(NC(=O)COC(=O)/C=C/c2ccc(Cl)cc2)c1
1176870	1	COc1ccccc1NC(=S)N(Cc1ccco1)Cc1cc2cc(C)ccc2[nH]c1=O
7501513	1	CCn1c(SCC(=O)NCCc2ccccc2)nc2c([nH]c3ccccc32)c1=O
4105081	1	Cc1ccccc1NC(=S)N=Nc1c(O)n(C)c2ccc(S(=O)(=O)N3CCOCC3)cc12
5994795	1	COc1cc(/C(C)=N/NC(=O)c2cnn(-c3ccccc3)c2C(F)(F)F)cc(OC)c1OC
3786764	1	CCC(=O)NC(=S)Nc1ccc(NC(=O)c2ccc(C)c([N+](=O)[O-])c2)cc1
1157096	1	C=CCn1c(SCC(=O)NCc2ccco2)nc2sc(C)c(C)c2c1=O
1770084	1	Cc1cc(N2CCOCC2)ccc1/C=C1\NC(=O)N(CC(=O)Nc2ccccc2C)C1=O
16805986	1	Cc1ccc(C2CC(c3cccs3)=NN2C(=O)CSc2nc(=O)n3cc(C)ccc3n2)cc1
2439147	1	Cc1cccc(NC(=O)CNC(=O)COc2ccc(C(=O)c3ccc(F)cc3)cc2)c1C
1503136	1	CSc1ccccc1NC(=O)Cn1nnc(-c2ccc(S(C)(=O)=O)cc2)n1
16195533	1	CC(=O)Nc1ccc(NC(=O)CSc2ccc(-c3cccs3)nn2)cc1
20903283	1	CC(=O)N1c2ccc(S(=O)(=O)NCC3CCC(C(=O)NC4CCCCC4)CC3)cc2CC1C
989841	1	O=C(CSc1nc2ccccc2c(=O)n1-c1ccccc1)N1CCc2ccccc21
2305037	1	CCOc1ccc(NC(=O)CC(=O)Nc2ccc(OCC)cc2)cc1
3243917	1	Cc1nn(Cc2ccccc2)c(C)c1NC(=O)c1cc(-c2ccc3c(c2)OCO3)on1
9568634	1	COc1ccccc1NC(=O)c1cc2ccccc2o/c1=N\O
2487493	1	CC(=O)c1c(C)[nH]c(C(=O)OCC(=O)Nc2sc3c(c2C#N)CCCC3)c1C
2559652	1	COc1cccc(Nc2nnc(SCn3nnc4ccccc4c3=O)s2)c1
1261892	1	NS(=O)(=O)c1ccc(CCNC(=O)c2cc(-c3ccccn3)nc3ccc(Br)cc23)cc1
3239431	1	Cc1c(NS(=O)(=O)c2ccc3c(c2)CCN3C(=O)C2CC2)c(=O)n(-c2ccccc2)n1C
1078194	1	Cc1ccc(OCC(=O)Nc2ccc(S(=O)(=O)Nc3ccccn3)cc2)cc1C
5064411	1	Cc1ccc(NC(=O)CCn2c(=S)oc3ccccc32)cc1
944832	1	S=c1nc[nH]c2c1[nH]c1ccc(Cl)cc12
993137	1	CC(=O)c1sc(NC(=O)COc2ccc(Br)cc2)nc1C
2334129	1	CCOC(=O)c1ccc(-c2csc(NC(=O)CN3CCC(C)CC3)n2)cc1
1971610	1	CC(=O)NC(=S)Nc1ccc(NC(=S)NC(=O)/C=C/c2ccco2)cc1
4608040	1	O=C(Nc1ccc(-c2nc3ccccc3s2)cc1)C1=COCCO1
23724422	1	CC[n+]1ccc(/C=C/c2c[nH]c3ccccc23)cc1.[Cl-]
3645201	1	COC(=O)C1=C(CSc2nc3ccccc3s2)NC(=O)NC1c1ccc(F)cc1
3583939	1	CCn1c(CNC(=O)C23CC4CC(CC(C4)C2)C3)nnc1SCC(=O)Nc1nnc(C)s1
654089	1	O=C(O)C1Nc2c(O)cccc2C2C=CCC12
5860225	1	COC(=O)c1cn(NC(=O)/C=C/c2cc(OC)ccc2OC)c(=O)c2ccccc12
2575423	1	Cc1ccccc1Nc1nc(N)nc(CSc2nc3ccccc3c(=O)n2CCCO)n1
1308956	1	CCOc1ccc(NC(=O)c2cccc(NC(=O)c3ccccc3)c2)cc1
659708	1	Cc1ccc(OCc2nnc(NC(=O)c3ccco3)s2)c(C)c1
2388576	1	COc1cc(NC(=O)COC(=O)/C=C/c2ccc(Cl)cc2Cl)cc(OC)c1
2478794	1	Cc1cc(NC(=O)COC(=O)c2oc3c(ccc4ccccc43)c2C)no1
1365524	1	Cc1cc2nc(-c3cccc(NC(=O)c4ccc(Br)o4)c3)oc2cc1C
647992	1	Cn1c(C(=O)N2CCN(c3nc4ccccc4s3)CC2)cc2sccc21
24789320	1	CCCNC(=O)c1ccc(N2CCC3(CC2)CC(c2ccccc2)=NO3)c(N)c1
914928	1	Cc1ccc2[nH]c3c(=O)n(Cc4ccco4)cnc3c2c1
2432845	1	O=C(Nc1ccc2c(c1)CCC2)c1cc(=O)[nH]c2ccccc12
5165670	1	CCOc1ccc(NC(=O)CCC(=O)NNC(=O)COc2ccc(C)cc2Br)cc1
651184	1	CCn1c(COc2ccccc2C)nnc1SCC(=O)Nc1cc(C)on1
2079240	1	Cc1ccc(/C=C/C2=Cc3c(sc(NC(=O)CSc4n[nH]c(N)n4)c3C#N)C(C)(C)C2)o1
995141	1	Cc1ccc(C)c(NC(=O)Cn2nc(-c3ccccc3)nc2-c2ccccc2)c1
2981556	1	CCOc1ccc(N2C(=O)CC(NC3CCN(C(=O)c4cccc(Cl)c4)CC3)C2=O)cc1
5999204	1	C/C(=N\NC(=O)c1c(Br)cnn1C)c1ccc(NC(=O)c2ccc(F)cc2)cc1
135752415	1	COc1ccc(O)c(/C=N/NC(=O)CCC(=O)Nc2ccc(C)cc2)c1
5926713	1	N#C/C(=N\Nc1cccc(C(F)(F)F)c1)C(=O)c1csc(-c2cccnc2)n1
2137161	1	Cc1ccc(-n2c(=O)c3ccc(C(=O)NCc4ccco4)cc3n(Cc3ccccc3C#N)c2=O)cc1
7786271	1	O=C(COC(=O)c1cc(Br)ccc1O)Nc1ccc2c(c1)OCCO2
3861485	1	COc1cc(NC(=O)c2ccc(C)c([N+](=O)[O-])c2)ccc1NC(=O)c1ccco1
24817919	1	CCCCn1c(N)c(N(CCC(C)C)C(=O)c2cc(-c3ccco3)nc3ccccc23)c(=O)[nH]c1=O
15944862	1	COc1ccc(C(=O)CSc2nnc(NC(=O)C3CC(=O)N(c4cccc(OC)c4)C3)s2)cc1
4216073	1	COc1ccccc1NS(=O)(=O)c1cc(NC(=O)c2ccc3ccccc3n2)ccc1Cl
9564362	1	COc1ccc2cc(/C=N/NC(=O)c3ccc(CN(c4ccc(C)c(C)c4)S(C)(=O)=O)cc3)c(Cl)nc2c1
3713405	1	C=CCOC(=O)C1=C(C)NC(C)=C(C(=O)OCC=C)C1c1cn(-c2ccccc2)nc1-c1ccco1
3949859	1	CC1CC(C)CN(S(=O)(=O)c2ccc(C(=O)NCc3ccc4c(c3)OCO4)cc2)C1
735091	1	Nc1nc(-c2ccc3c(c2)CCCC3)cs1
4989136	1	O=C(NCCCCCCNC(=O)c1ccc(Br)s1)c1ccc(Br)s1
135415423	1	COc1ccc(N2CC(O)=C(c3nc4ccccc4s3)C2=N)cc1
650604	1	Cc1csc(NC(=O)CSc2nc3sc(C)c(C)c3c(=O)[nH]2)n1
16195488	1	O=C(Nc1ccccc1F)c1cc2c(s1)-c1ccccc1S(=O)(=O)C2
9597341	1	CCOc1ccc(N(CC(=O)N/N=C(\C)c2cccc(NC(C)=O)c2)S(=O)(=O)c2ccccc2)cc1
9593324	1	O=C(COc1ccc(/C=N/NC(=O)c2ccc(O)cc2)cc1)Nc1ccc([N+](=O)[O-])cc1
7206330	1	Cc1ccc(NC(=O)CSc2ccc(-c3ccc4c(c3)OCO4)nn2)cc1F
1390460	1	O=C(CN1C(=O)S/C(=C\C=C\c2ccccc2)C1=O)Nc1ccc(O)cc1
2497379	1	Cc1oc(-c2ccccc2)nc1C(=O)Nc1nccs1
1475690	1	Cc1cc(C)c(S(C)(=O)=O)c(N(C)NC(=O)c2ccc(Cl)c(Cl)c2)n1
3178012	1	COC(=O)c1ccc(NC(=O)Cn2nc(-c3ccncc3)nc2SCC(=O)Nc2nccs2)cc1
662198	1	CCOc1ccc(C2C=C(c3ccc(C)cc3)Nc3nnnn32)cc1
16195613	1	CCOc1ccc(-n2c(=O)c3sccc3n(CC(=O)Nc3cccc(OC)c3)c2=O)cc1
6876832	1	O=C(CSCc1ccc(Cl)cc1)N/N=C/c1ccc(OCC(=O)Nc2ccccc2)cc1
3236272	1	COc1ccc(-c2cc(C(=O)Nc3c(C)nn(Cc4ccccc4Cl)c3C)no2)cc1
4130415	1	CCc1ccccc1NC(=S)N=Nc1c(O)n(C)c2ccc(S(=O)(=O)N3CCOCC3)cc12
2241766	1	Nc1nnc(SCC(=O)Nc2ccc3nc(SCC(=O)Nc4ccccc4)sc3c2)s1
6470199	1	COc1ccccc1NC(=O)Nc1ccc(C(N)=O)cc1
2808514	1	Cc1csc2ncnc(N3CCN(C(=S)Nc4ccc(C(F)(F)F)cc4)CC3)c12
3238250	1	COc1cccc(-c2cc(C(=O)Nc3cnn(Cc4ccc(F)cc4)c3)no2)c1
3241551	1	COc1ccc(CN2CC(C(=O)N3CCOCC3)CC2=O)cc1
2367787	1	COc1cccc(-n2c(SCC(=O)c3c[nH]c4ccccc34)nc3ccccc3c2=O)c1
2421432	1	CN(c1ccc(OCC(=O)Nc2nc3ccccc3s2)cc1)S(=O)(=O)c1ccccc1
1001148	1	Cc1cccc(N(CC(=O)Nc2ccc(-c3nc4ccc(C)cc4s3)cc2)S(C)(=O)=O)c1
6903130	1	CCOc1ccc(/C=N/NC(=O)c2ccc(CSc3nc4ccccc4[nH]3)cc2)cc1
3237034	1	Cc1ccc(-n2nc3c(c2NC(=O)c2ccc4c(c2)OCO4)CSC3)cc1
5071511	1	COc1ccc(-c2csc(NC(=S)NC(=O)c3ccc(S(=O)(=O)N(C)C)cc3)n2)cc1OC
711247	1	O=C(OCCN1C(=O)c2ccccc2C1=O)c1ccccc1
5758990	1	O=C(N/C(=C\c1ccc(Br)cc1)c1nc2ccccc2[nH]1)c1ccco1
648722	1	CC(OCc1ccccc1)C(NC(=O)OC(C)(C)C)C(=O)NCC1CCCO1
2309203	1	O=C(NCCCCNC(=O)c1ccc(Br)s1)c1ccc(Br)s1
2371823	1	CCc1cccc(CC)c1NC(=O)COC(=O)/C(C#N)=C/c1ccc(OC)cc1
1260008	1	NC(=O)c1nn(-c2ccccc2)nc1NC(=O)Cn1nnc(-c2ccccc2)n1
16190017	1	COc1ccc(CC2(CO)CCN(Cc3ccc(NC(C)=O)cc3)CC2)cc1
7125637	1	Nc1c(C(=O)NC2CC2)sc2nc3c(c(-c4ccco4)c12)CC/C3=C/c1ccco1
1442414	1	CC(C)(C)c1nc(SCC(=O)Nc2ccc3c(c2)OCCO3)c2ccccc2n1
3241201	1	COC(=O)c1ccc(Cn2cnc3c(cnn3-c3ccc(Cl)cc3)c2=O)o1
2999893	1	C=CCn1c(SCC(=O)NC(=O)NCc2ccco2)nc2sc(C)c(C)c2c1=O
135466646	1	CCOC(=O)Cc1cc(=O)[nH]c(/N=C(\N)Nc2ccc(C)cc2C)n1
3238290	1	CCOC(=O)c1oc2ccccc2c1NC(=O)c1ccc(S(=O)(=O)N(C)C)cc1
15944850	1	CC(=O)Nc1ccc(NC(=O)CSc2ccc(-c3ccc4c(c3)OCO4)nn2)cc1
135443068	1	Cc1cc(N/N=C/c2c(O)ccc3ccccc23)nc(-c2ccccc2O)n1
9592266	1	O=[N+]([O-])c1cccc(/C=N/Nc2nc(NCc3ccccc3)nc(N3CCOCC3)n2)c1
4293014	1	Cc1ccc(S(=O)(=O)NCC2CCC(C(=O)NC3CCCCC3)CC2)cc1
1572935	1	CCOC(=O)c1cnc(SCc2nc(N)nc(Nc3ccc(F)cc3)n2)nc1N
3153622	1	COc1ccc(OC)c(NC(=O)C2CCCN(S(=O)(=O)c3ccc(-n4cnnn4)cc3)C2)c1
3130874	1	O=C(CSc1nc2ccc(NC(=O)CSc3nnnn3-c3ccccc3)cc2s1)Nc1ccccc1
2489851	1	O=c1c2ccccc2nc(SCc2nc3ccccc3s2)n1Cc1ccco1
2102981	1	COc1cc(CC(=O)Nc2sc3c(c2C(N)=O)CCCC3)cc(OC)c1OC
135505315	1	O=C(CCSc1nc2ccccc2s1)N/N=C/c1c(O)ccc2ccccc12
2462585	1	N#Cc1ccsc1NC(=O)COC(=O)c1cc2ccccc2cc1O
5949904	1	COc1ccccc1/C=C/C(=O)OCC(=O)c1c(N)n(C)c(=O)n(C)c1=O
2948144	1	COC(=O)Cc1c(C)c2ccc(OCC(=O)N3CCCC(C)C3)c(C)c2oc1=O
6214002	1	COc1ccc2cc(C(=O)/C=C/c3cc(OC)c(OC)c(OC)c3)ccc2c1
2964209	1	CC1CCCC(C)N1S(=O)(=O)c1ccc(NC(=O)CCn2cnc3ccccc3c2=O)cc1
1338304	1	Cc1cccc(COC(=O)Nc2ccc(NC(=O)c3ccccc3Cl)cc2)c1
1452464	1	CCS(=O)(=O)N1CCN(S(=O)(=O)c2ccc(S(=O)(=O)NC3CC3)cc2)CC1
4658446	1	O=C(CCn1c(=S)oc2ccccc21)Nc1ccc(F)cc1
647541	1	O=C(Cn1nnc(-c2ccc(CN3CCOCC3)cc2)n1)Nc1nc(-c2ccccc2)cs1
6407175	1	Cc1ccc(-c2nnc(NCc3nc4ccccc4[nH]3)c3ccccc23)cc1S(=O)(=O)N(C)C
3228200	1	CCOc1ccc(Nc2ncnc3c2nnn3Cc2ccccc2)cc1
2611589	1	COc1ccccc1Nc1nnc(SCC(=O)NC(=O)Nc2ccc3c(c2)OCCO3)s1
2224537	1	O=C(CCn1c(=O)oc2ccccc21)Nc1cccc(Cl)c1
3529029	1	O=C(CSc1cn(Cc2ccccc2)c2ccccc12)Nc1nccs1
2205156	1	O=C(CSc1n[nH]c(-c2ccco2)n1)Nc1sc2c(c1C(=O)Nc1ccccc1)CCCC2
2862265	1	CC(=O)C1=C(C)NC(SCC(=O)c2ccc(-c3ccccc3)cc2)=C(C#N)C1c1cccnc1
2149377	1	CCOC(=O)COc1cccc2c(=O)n(CC(=O)N3CCc4ccccc43)ccc12
6223687	1	COc1ccccc1/C=C(/CC(=O)NCc1ccc2c(c1)OCO2)c1nc2ccccc2s1
3239116	1	COc1ccc(-c2cc(C(=O)Nc3cnn(Cc4ccccc4C)c3)no2)cc1OC
2470048	1	Cc1cc(C)n(-c2ccc(Cl)c(C(=O)OCC(N)=O)n2)n1
4612059	1	COc1ccccc1NS(=O)(=O)c1cccc(-n2c(O)c(C=Nc3ccccc3C(=O)O)c3ccccc3c2=O)c1
6162320	1	C/C(=N/NC(=O)c1ccncc1)c1ccc(NC(=O)c2ccc(Cl)cc2Cl)cc1
3236124	1	CCOC(=O)c1oc2ccccc2c1NC(=O)c1ccc(S(=O)(=O)N2CCCC2)cc1
3237561	1	O=C(CCCCCn1c(=S)[nH]c2cc3c(cc2c1=O)OCO3)N1CCN(Cc2ccccc2)CC1
3190224	1	Cc1ccc(C(C(=O)NCC2CCCO2)N(Cc2ccccc2F)C(=O)Cn2nnc(-c3cccs3)n2)cc1
1563977	1	O=C1c2ccccc2C(=O)N1CCCCN(C(=O)c1cc2ccccc2oc1=O)c1ccc(Cl)cc1
1478322	1	CCOc1[nH]n(-c2ccc(Cl)cc2)c(=O)c1C=Nc1ccc(O)cc1
1335528	1	COc1ccc(Cc2nnc(NC(=O)Nc3ccccc3F)s2)cc1OC
2452051	1	N#Cc1ccc(CSc2nnc(NC(=O)c3ccc4ncsc4c3)s2)cc1
16019326	1	Cc1ccc(NC(=O)CSc2ccc(-c3ccccn3)nn2)cc1F
1019054	1	CCN(CC)S(=O)(=O)c1ccc(C(=O)NN(C)C2=NS(=O)(=O)c3ccccc32)cc1
135439779	1	COC(=O)c1cc(Nc2cc(C)c3ccc(O)cc3n2)cc(C(=O)OC)c1
1293859	1	O=C(CSC(=S)N1CCCCC1)Nc1nc(-c2ccccc2)c(-c2ccccc2)o1
3244269	1	Cc1cccc(N2CCN(S(=O)(=O)c3ccc4c(c3)n(C)c(=O)c(=O)n4C)CC2C)c1
3333649	1	COc1ccc(S(=O)(=O)N2CCCCC2)cc1NC(=O)c1cccs1
1320621	1	COc1cc(NC(=O)c2ccccc2)c(OC)cc1NC(=O)Cc1ccc(Br)cc1
1608030	1	CC(/C=C1\SC(=S)N(c2ccc(C(=O)O)cc2)C1=O)=C\c1ccccc1
9608112	1	CN=C1SC(CC(=O)Nc2c(C)cccc2C)C(=O)N1/N=C/c1cccs1
9620626	1	CS(=O)(=O)N(CC(=O)N/N=C/c1ccc(OCC(=O)N2CCOCC2)cc1)c1ccccc1Cl
1348626	1	Cc1ccc(-c2nc3ccccc3o2)cc1NC(=S)NC(=O)c1cccs1
18578892	1	Nc1c(C(=O)Nc2ccc3c(c2)OCCO3)nnn1Cc1cccc(Br)c1
6372599	1	CCOC(=O)N/N=C(/C)c1ccc([N+](=O)[O-])o1
1348408	1	CC(=O)c1cccc(NC(=O)c2ccc(-c3ccccc3[N+](=O)[O-])o2)c1
2089374	1	O=c1c2ccccc2nnn1CSc1nnc(Nc2ccccc2)s1
2388964	1	O=C(COC(=O)c1cc(NS(=O)(=O)c2cccs2)ccc1O)Nc1cc(Cl)ccc1Cl
15944700	1	O=C(Nc1cc(Cl)cc(Cl)c1)c1ccc(Cn2c(=O)[nH]c3ccsc3c2=O)cc1
2223899	1	COc1ccc(NC(=S)Nc2cc(-c3ccccc3)[nH]n2)cc1Cl
2222341	1	CC(C)C(=O)Nc1ccc(C(=O)NNC(=O)CCCOc2ccc(Cl)cc2Cl)cc1
1615432	1	O=C(CNC(=O)c1ccc(N2C(=O)c3ccccc3C2=O)cc1)OCC(=O)c1ccc(Cl)cc1
694360	1	N#Cc1c(-c2cccs2)cc(C2CC2)nc1SCC(N)=O
647747	1	COC(=O)c1cccc(S(=O)(=O)N2CCC(NC(=O)Nc3cccc(F)c3)CC2)c1
1337930	1	Cc1ccc(C)c(N(CC(=O)Nc2ccc(-c3nc4ccc(C)cc4s3)cc2)S(C)(=O)=O)c1
3242371	1	COc1ccc(-c2cc(CCCC(=O)NCCc3ccc(OC)cc3OC)no2)cc1
3260314	1	COc1ccc2c(c1)c(CC(=O)Nc1cccc(S(N)(=O)=O)c1)c(C)n2C(=O)c1ccc(Cl)cc1
5310080	1	Cc1c(C(=O)NCc2ccc3c(c2)OCO3)sc2nc(-c3ccc(F)cc3)cn12
16218404	1	O=C(O)c1cc(O)c2c(c1)[C@H]([C@H]1c3cc(C(=O)O)cc(O)c3C(=O)c3c(O[C@@H]4O[C@H](CO)[C@@H](O)[C@H](O)[C@H]4O)cccc31)c1cccc(OC3O[C@H](CO)[C@@H](O)[C@H](O)[C@H]3O)c1C2=O
2108618	1	CCOc1ccc(NC(=O)c2ccc(NC(=S)NC3CC3)cc2)cc1
959048	1	CSc1nc2ccc(NC(=O)c3ccc(Cl)s3)cc2s1
794912	1	NC(=O)c1cccc(NC(=O)Nc2ccc(Cl)cc2)c1
3244833	1	O=C(CCCn1c(SCC(=O)c2ccc(F)cc2)nc2ccccc2c1=O)NCc1ccco1
135534216	1	CCOc1ccc(Nc2nnc(SCc3nc4ccccc4c(=O)[nH]3)s2)cc1
4050233	1	CC1CCN(C(=O)c2ccc(SCc3ccccc3F)c([N+](=O)[O-])c2)CC1
3236471	1	CCOc1ccc(OCC)c(NC(=O)C(NS(=O)(=O)c2ccc3c(c2)oc(=O)n3C)C(C)C)c1
647777	1	O=C(Nc1ccc(S(=O)(=O)N2CCC(C(=O)NC3CCCCC3)CC2)cc1)c1ccco1
652023	1	COc1ccc(N2CCN(S(=O)(=O)c3ccc(C(=O)NCc4ccco4)cc3)CC2)cc1
5718958	1	Cc1[nH]c2ccccc2c1/C=C/C(=O)c1ccncc1
9551101	1	O=S(=O)(c1ccc2nc(-c3ccccc3)[nH]c2c1)N1CCN(c2ccc(Cl)cc2)CC1
2814075	1	O=C(Nc1ccc(NC(=O)c2ccccc2O)cc1)Nc1ccc(F)cc1F
9675211	1	C(=N/Nc1nc(N2CCCC2)nc(N2CCCC2)n1)\c1ccccc1OCc1ccccc1
6851027	1	Cc1ccc(S(=O)(=O)/N=C(\N)Nc2nc(C)c3cc(C)c(C)cc3n2)cc1
4780145	1	COc1ccccc1N1CCN(c2ccc([N+](=O)[O-])cc2Cl)CC1
3236801	1	COc1ccc(CNC(=O)CCCCCn2c(SCC#N)nc3cc4c(cc3c2=O)OCO4)cc1
15997153	1	COc1cc(NC(=O)C2Cc3ccccc3CN2S(C)(=O)=O)cc(OC)c1
1208555	1	O=C(c1ccc(CN2CCc3ccccc3C2)cc1)N1CCc2ccccc2C1
2384970	1	CCN(CC)S(=O)(=O)c1ccc(C(=O)Nc2nnc(NC(=S)Nc3ccccc3)s2)cc1
3240856	1	CC(C)Cn1cc(C(=O)NCc2cccs2)c2c3ccccc3n(C)c2c1=O
135464585	1	Cc1ccc(N=Nc2ccc(O)c(/C=N\NC(=O)c3ccc(N)cc3)c2)cc1C
3244417	1	Cc1ccc(NC(=O)Cn2c(=O)n(CCCC(=O)NCc3ccco3)c(=O)c3ccccc32)cc1
4092119	1	O=S(=O)(Nc1nc2ccccc2nc1Nc1cccc(S(=O)(=O)N2CCCCC2)c1)c1ccccc1
6851018	1	Cc1ccc(S(=O)(=O)/N=C(\N)Nc2nc(C)c3ccc(C)cc3n2)cc1
1132169	1	N#C/C(=C\c1cn(CCOc2ccccc2)c2ccccc12)C(=O)NCc1cccs1
12004437	1	Cc1ccc(NC(=O)CN2C(=O)N/C(=C/c3cccn3-c3ccc(C(=O)O)cc3)C2=O)cc1
2352656	1	CCn1c2ccccc2c2cc(NC(=O)COC(=O)c3ccccc3F)ccc21
931915	1	COc1ccc2c(c1)[nH]c1c(=O)n(Cc3ccco3)cnc12
1585282	1	COc1ccc2nc(NC(=O)CSc3nnc(N)s3)sc2c1
4993378	1	O=C(CSc1nc2ccccc2c(=O)n1-c1ccccc1)c1c[nH]c2ccccc12
12004818	1	Cc1ccccc1NC(=O)Cn1c(=O)n(Cc2ccccc2)c(=O)c2c(C)c(C)sc21
2089683	1	CN(Cc1ccccc1)S(=O)(=O)c1ccc(Cl)c(C(=O)NCc2ccc3c(c2)OCO3)c1
2866311	1	COc1cc(C(=O)Nc2cccc(-c3nc4cc(C)ccc4o3)c2C)cc(OC)c1OC
9635811	1	CCN(/N=C/c1ccc(Cl)cc1)c1cc(=O)n(C)c(=O)[nH]1
2156259	1	O=C(CSc1nc2c([nH]c3ccccc32)c(=O)n1-c1cccc(Cl)c1)N1CCOCC1
2199814	1	O=C(Nc1nnc(CC(c2ccccc2)c2ccccc2)s1)c1ccco1
2213056	1	Cc1ccc(-c2nn3c(C)nnc3s2)cc1NC(=O)c1ccc(-c2ccc(Cl)cc2Cl)o1
6874537	1	Cc1nn(C)c(C(=O)N/N=C/c2ccc(-c3ccccc3)cc2)c1Cl
18567790	1	CS(=O)(=O)c1ccc(-c2cccc(NC(=O)c3ccc(Br)o3)c2)nn1
6885502	1	Cc1cc(C(=O)N/N=C/c2ccc(-c3cccc(Br)c3)o2)n[nH]1
2998933	1	Cc1nn(-c2ccccc2)c2sc(C(=O)OCn3nnc4ccccc4c3=O)cc12
1132164	1	Cc1ccccc1OCCn1cc(/C=C(\C#N)C(=O)NCc2ccco2)c2ccccc21
2375307	1	O=C(NC(=S)NCc1nc2ccccc2[nH]1)c1ccc(F)cc1
1584561	1	O=C(CCN1C(=O)/C(=C/c2cccs2)SC1=S)NC1=NCCS1
9597126	1	O=C(CCC(=O)Nc1ccc(Br)cc1)N/N=C/c1ccc(F)cc1
2922391	1	CCCCNCCOCCOc1ccccc1-c1ccccc1.O=C(O)C(=O)O
3604340	1	COc1n[nH]c(C(=O)Nc2nc3ccccc3s2)c1[N+](=O)[O-]
9657955	1	CC(NC(=O)COc1ccc(/C=N/NC(=O)C(=O)Nc2ccccc2Br)cc1)c1ccccc1
4212053	1	O=C(CSc1nnc(-c2ccc(O)cc2)o1)Nc1ccc2c(c1)OCCO2
5281600	1	O=c1cc(-c2ccc(O)c(-c3c(O)cc(O)c4c(=O)cc(-c5ccc(O)cc5)oc34)c2)oc2cc(O)cc(O)c12
889089	1	Cc1ccc2oc(-c3cccc(NC(=O)Cc4cccs4)c3)nc2c1
5206844	1	COc1ccc(NC(=O)CCC(=O)c2cccs2)cc1S(=O)(=O)Nc1ccc(Cl)cc1
9566530	1	COc1cc(C(=O)Oc2ccc(/C=N/NC(=O)c3ccncc3)cc2)cc(OC)c1OC
4878043	1	Cc1cc(C(=O)CN2C(=O)NC3(CCCc4sccc43)C2=O)c(C)n1-c1ccc(Cl)cc1
3466680	1	Cc1onc(-c2c(Cl)cccc2Cl)c1C(=O)NC(=S)Nc1sc2c(c1C(N)=O)CCC(C)C2
2371427	1	Cc1cc(C(=O)OCC(=O)Nc2nc(-c3ccccc3)cs2)c(C)o1
2952917	1	CC(=O)c1cccc(NC(=S)N2CCN(CCN3C(=O)c4cccc5cccc(c45)C3=O)CC2)c1
6896419	1	CCOc1ccc(/C=N/NC(=O)C(=O)NCc2ccco2)cc1
3189806	1	Cc1nnc(NC(=O)CSc2ncnc3scc(-c4ccccc4)c23)s1
1048733	1	COc1ccc(NC(=O)c2ccc(OC(=S)N(C)c3ccc(OC)cc3)cc2)cc1
2567228	1	CCc1c(C)sc2nc(SCC(=O)Nc3cc(C)on3)n(CCOC)c(=O)c12
1580330	1	CC(/C=C1\SC(=S)N(CCC(=O)Nc2ccc(O)cc2)C1=O)=C\c1ccccc1
992681	1	CCCc1cc2c(cc1NC(=O)c1ccc(Br)cc1)OCO2
5540880	1	CC(=O)/C(=N\Nc1cccc(Cl)c1)Sc1nnc(-c2ccccc2)n1-c1ccccc1
135427531	1	CCOc1ccc(N=C2NC(=O)C(CC(=O)Nc3ccc(OC)cc3)S2)cc1
2898064	1	Cc1ccc(C(=O)COC(=O)CNC(=O)CN2C(=O)c3ccccc3C2=O)cc1
2984275	1	O=C(CC(Sc1n[nH]c(-c2ccccc2)n1)c1ccccc1)NCc1ccccc1
2938005	1	Cc1ccc2nc(-c3ccc(NC(=O)C(C)N4C(=O)c5ccccc5C4=O)cc3)sc2c1
1838100	1	COc1ccc(NC(=O)c2cc(-c3cc(Cl)ccc3O)n[nH]2)c(OC)c1
5073725	1	C=CCNC(=O)c1ccc(Cn2c(=S)[nH]c3cc4c(cc3c2=O)OCO4)cc1
578730	1	COc1ccc(Cc2c(Cl)ncnc2Cl)cc1
22548404	1	COc1ccc(N2CCN(S(=O)(=O)c3cc4c(cc3C)NC(=O)CO4)CC2)cc1
4530290	1	N#Cc1ccc(NC(=O)COC(=O)C2Cc3ccccc3CN2C(=O)c2ccccc2)cc1
3849521	1	c1ccc(-c2ccc(C3=Nn4c(nnc4-c4cc(-c5ccccc5)n[nH]4)SC3)cc2)cc1
16746049	1	COc1cccc(C(=O)Nc2nc3c(ccc4onc(-c5ccccc5[N+](=O)[O-])c43)s2)c1
24980727	1	CCc1cc(C(=O)N(CC(C)C)c2c(N)n(Cc3ccccc3)c(=O)[nH]c2=O)sc1C
5101824	1	Cc1cc2cc(CNC(=O)c3ccc(S(=O)(=O)N4CCCC4)cc3)ccc2n1C
2208939	1	Cc1c(Cl)cccc1NC(=O)c1ccc(OCC(=O)NCc2ccccc2)cc1
16682062	1	O=[N+]([O-])c1ccc(C[n+]2cc(-c3ccc(Cl)c(Cl)c3)n3c2CCCCC3)cc1.[Br-]
1257113	1	COc1ccc(NC(=O)c2cc(-c3cccnc3)nc3c(C)c(C)ccc23)c(OC)c1
659918	1	CCCOc1cccc(-c2nnc(N)s2)c1
3918932	1	Cc1ccc(S(=O)(=O)N2CCOCC2)cc1NC(=O)CSc1nc2ccccc2c(=O)n1Cc1ccccc1
7189900	1	COc1cccc(OC)c1C(=O)Nc1nc2cc3c(cc2s1)OCO3
5344977	1	CO/N=C(/c1nonc1N)N1CCN(c2ccc([N+](=O)[O-])cc2)CC1
135481332	1	O=C1N/C(=C\c2ccccc2)C(O)=C1C=NCc1ccccc1
2726311	1	CN(C)C(=O)Oc1noc2cc(Cl)ccc12
654684	1	CCOc1ccc2nc(NCCNC(=O)Nc3ccccc3)c(C#N)cc2c1
1140634	1	Cc1cccc(NC(=O)/C(C#N)=C/c2cn(CC(=O)NCc3ccco3)c3ccccc23)c1C
653288	1	Cc1ccc2nc(-c3cccc(NC(=O)c4ccc5c(c4)OCCO5)c3)oc2c1
1769695	1	NC(=O)c1ccccc1NC(=O)c1cccc(C(=O)Nc2ccccc2C(N)=O)n1
7386168	1	Nc1c(C(=O)Nc2ccc3c(c2)OCCO3)nnn1Cc1cccc(F)c1
653445	1	Cc1ccc2c(c1)nnn2C1CCN(S(=O)(=O)c2ccc(C(=O)NC3CCCC3)cc2)CC1
5347052	1	CCOc1ccc(NC(=O)CCC(=O)N/N=C/c2ccc3c(c2)OCO3)cc1
1266096	1	Cc1ccc2nc(NC(=O)c3ccc(N4C(=O)CCC4=O)cc3)sc2c1
3224511	1	CCOc1cccc(NC(=O)Cn2nc(-c3ccc4c(c3)OCCO4)ccc2=O)c1
895328	1	CCc1nn(-c2ccccc2)c(=S)c2ccccc12
5931213	1	CCOc1ccc(/C=N/NC(=O)c2nnn(-c3nonc3N)c2-c2ccc(OCC)cc2)cc1
4110531	1	C#CCn1c(=NC(=O)c2sc3ccccc3c2Cl)sc2cc(S(N)(=O)=O)ccc21
5341360	1	Cc1cccc(C(=O)N/N=C/c2ccc(OC3CSC3)cc2)c1
4656900	1	COc1ccc(Nc2nc(N(C)c3ccccc3)nc(N)c2[N+](=O)[O-])cc1
2530041	1	Cn1c(=O)c(C(=O)CSc2nnc(Nc3ccccc3)s2)c(N)n(Cc2ccccc2)c1=O
2412605	1	CC(=O)Nc1ccc(S(=O)(=O)NCC(=O)OCc2cc(=O)oc3ccc4ccccc4c23)cc1
2335783	1	Cc1ccc2nc(-c3ccc(NC(=O)COC(=O)c4ccc(Br)o4)cc3)sc2c1
3960250	1	O=C(NCCc1c[nH]c2ccccc12)C(=O)Nc1ccccc1
9640315	1	COc1cccc(-c2c(C(=O)N/N=C(\C)c3ccc(Cl)s3)nnn2-c2nonc2N)c1
6863792	1	O=C(CSc1nnc(SCc2ccc(Cl)cc2)s1)N/N=C/c1c(Cl)cccc1Cl
1482514	1	CNC(=S)NNC(=O)c1sccc1OCc1cccc(C(F)(F)F)c1
3240214	1	COc1cccc(-n2nnc3c(=O)n(Cc4ccc(Br)cc4)cnc32)c1
2553288	1	COc1ccccc1Nc1nnc(SCC(=O)Nc2cc(C)on2)s1
2124160	1	O=C1COc2ccc(C(=O)COC(=O)C3CCN(S(=O)(=O)c4cccs4)CC3)cc2N1
718625	1	O=C(Nc1ccc2oc(-c3ccccc3)nc2c1)c1ccccc1F
8035262	1	COc1ccc(-c2nonc2NC(=O)c2oc3ccc(F)cc3c2C)cc1OC
2209187	1	Cc1ccc(CN(c2ccc(C(=O)NCc3ccc4c(c3)OCO4)cc2)S(C)(=O)=O)cc1
2998968	1	Cc1cc(C(=O)CSc2nc3ccccc3n2CCC#N)c(C)n1Cc1cccs1
2886983	1	CCCCOc1ccc(C(=O)Nc2ccc(C)cc2[N+](=O)[O-])cc1
5807013	1	Cc1cccc(NC(=O)CN2C(=O)N/C(=C\c3ccc(N4CCOCC4)cc3)C2=O)c1
2448091	1	COc1ccc(C(=O)N2C(=O)c3ccc(N)cc3C2=O)cc1
2554265	1	CSc1cccc(NC(=O)NCc2cccc(CNC(=O)Nc3cccc(SC)c3)c2)c1
3158154	1	N#Cc1c(NC(=O)C2CC(c3ccccc3O)=NO2)sc2c1CCC2
16193211	1	Cc1ccc(Nc2nc3ccccc3n3nnnc23)cc1
876940	1	Cc1cc(C)c2cccc(NC(=S)NC(=O)c3ccccc3)c2n1
18581286	1	O=C(Nc1ccc(-c2ccc(N3CCCCC3)nn2)cc1)c1ccc(Br)o1
18282351	1	COc1ccc(CCNC(=S)N2CCN(S(=O)(=O)c3ccc(F)cc3)CC2)cc1
856007	1	c1cc2ccc3ccc(-n4cnnn4)c4ccc(c1)c2c34
9596674	1	Cc1cccc(C(=O)Oc2ccccc2/C=N/Nc2ccc([N+](=O)[O-])cc2)c1
15944899	1	Cc1ccc(N2CC(C(=O)Nc3nnc(SCC(=O)Nc4cc(C)on4)s3)CC2=O)cc1
663542	1	O=C(CSc1ncnc2c1oc1ccccc12)Nc1cccc(F)c1
795655	1	COc1ccc(N2CCN(C(=S)Nc3ccc(F)cc3)CC2)cc1
3189957	1	O=S(=O)(NCc1ccccc1)c1ccc(S(=O)(=O)N(Cc2cccs2)CC2CCCO2)cc1
9593909	1	COc1ccc2cc(/C=N/NC(=O)CN(c3ccccc3)S(=O)(=O)c3ccccc3)c(Cl)nc2c1
1975791	1	Cc1cc(/C=C2\SC(=S)N(C)C2=O)c(C)n1-c1ccccc1O
3189797	1	Cc1ccc(-c2csc3ncnc(SCC(=O)Nc4nnc(C)s4)c23)cc1
24685395	1	O=C(CCc1nc2sc3c(c2c(=O)[nH]1)CCCC3)Nc1ccccc1Cl
2998640	1	Cc1cc(C(=O)CSc2nnnn2-c2ccccc2)c(C)n1CC1CCCO1
1073734	1	Cc1ccc(C(=O)Nc2nc3ccc(S(C)(=O)=O)cc3s2)cc1C
1397416	1	O=C1N=C(N2CCN(c3ccccc3)CC2)S/C1=C\c1cn[nH]c1-c1ccccc1
2305429	1	CCOC(=O)N=S(=O)(Oc1ccc([N+](=O)[O-])cc1)c1ccccc1
1209501	1	Cn1c(=O)n(C)c2cc(/C=C3/NC(=O)N(Cc4ccccc4)C3=O)ccc21
9637108	1	Cc1cccc(/C=N/NC(=O)c2cc3c(s2)-c2ccccc2CC3)c1
2865047	1	NC(=O)C[N+]1(CC#CC(O)(c2ccccc2)c2ccccc2)CCCC1.[I-]
3167530	1	Cc1sc2ncnc(SCC(=O)NNC(=O)COc3cccc4ccccc34)c2c1C
3804919	1	COC(=O)Cc1c(C)c2ccc(OC3CCCCC3=O)c(C)c2oc1=O
1132167	1	N#C/C(=C\c1cn(CCOc2ccccc2F)c2ccccc12)C(=O)NCc1cccs1
3798147	1	Cc1ccc(Nc2nc(NCC3CCCO3)nc(N)c2[N+](=O)[O-])cc1C
3510578	1	Cc1nn(Cc2ccccc2)c(Cl)c1C(=O)OC(C)C(=O)Nc1ccc(F)cc1Cl
1611638	1	CCOC(=O)Cc1csc(NC(=O)CSc2nc(N)c3c(C)c(C)sc3n2)n1
2738521	1	Cc1cc(N2CCN(CC(O)C(F)(F)F)CC2)c2ccccc2n1
2363932	1	CCOc1ncccc1C(=O)OCC(=O)Nc1ccc(C(N)=O)cc1
4909006	1	O=C(COc1ccccc1)N=C1SC2CS(=O)(=O)CC2N1Cc1ccccc1
741043	1	COc1ccccc1C(=O)Nc1nnc(-c2ccc(F)cc2)s1
24819832	1	COCCOC(=O)c1c(NC(=O)COC(=O)Cc2cccc(OC)c2)sc(C(N)=O)c1C
11920923	1	Cc1cc(=O)oc2c3c(cc(OCC(=O)N4CCC[C@H]4C(=O)O)c12)OC(C)(C)CC3
11958641	1	O=C(NCc1ccc2c(c1)OCO2)C12CN(Cc3ccccc3)CC1C(c1cccc([N+](=O)[O-])c1)=NO2
1930028	1	COc1ccc(NC(=S)NNC(=S)Nc2cccc(C(F)(F)F)c2)cc1
7270392	1	COc1ccc2oc(C(=O)OCC(=O)Nc3ccc(NC(C)=O)cc3)c(C)c2c1
1387730	1	COc1ccc(CC(=O)NNc2ncnc3c2cnn3-c2ccc(C)cc2)cc1
7209840	1	CC1(C)NC(=O)N(CC(=O)OCC(=O)c2ccc(F)cc2)C1=O
5207632	1	CCOC(=O)CC(NC(=O)C1c2ccccc2Oc2ccccc21)c1ccccc1Cl
2998337	1	Cc1ccc(-n2nnnc2SCC(=O)c2cc(C)n(CC3CCCO3)c2C)cc1
16549413	1	COc1ccc(NC(=O)COc2ccc3c(C)cc(=O)oc3c2)cc1S(=O)(=O)N1CCCCC1
2388844	1	Cc1ccc(-c2csc(NC(=O)COC(=O)c3cccc(S(=O)(=O)N4CCOCC4)c3)n2)cc1
6461111	1	Cc1cc2c(Nc3ccc(C(=O)O)cc3)ncnc2s1.Cl
22513425	1	Cc1ccccc1CNC(=O)C1CCN(c2nnc(N3CCCC3=O)s2)CC1
1231499	1	COc1cc(OC)c(/C=C2\SC(=O)N(CC(=O)Nc3ccccc3F)C2=O)c(OC)c1
2392023	1	CCOC(=O)c1c(C)[nH]c(C(=O)COC(=O)CNC(=O)c2ccc(Cl)cc2Cl)c1C
12005386	1	CCCCOc1ccc(C(=O)Nn2c(-c3cccs3)nc3ccccc3c2=O)cc1
4057115	1	Oc1ccc(N=Nc2ccccc2C(F)(F)F)c2cccnc12
2383061	1	CCOC(=O)c1c(C)[nH]c(C(=O)OCC(=O)Nc2ccc(OC)c(Cl)c2)c1C
6497572	1	CCc1ccc(N2CC(C(=O)Nc3ccc(S(=O)(=O)NCC4CCCO4)cc3)CC2=O)cc1
16218503	1	O=C(O)c1cc(O)c2c(c1)[C@@H]([C@H]1c3cc(C(=O)O)cc(O)c3C(=O)c3c(O[C@@H]4O[C@H](CO)[C@@H](O)[C@H](O)[C@H]4O)cccc31)c1cccc(OC3O[C@H](CO)[C@@H](O)[C@H](O)[C@H]3O)c1C2=O
4415331	1	NS(=O)(=O)c1ccc(NC(=O)c2ccc(S(=O)(=O)N3CCc4ccccc43)cc2)cc1
3186499	1	CCc1nnc(NC(=O)CSc2nc3cc4c(cc3cc2C)OCCO4)s1
6737843	1	O=C(Nc1ccc(-c2nc3ccccc3o2)cc1)c1ccc(N2C(=O)C3C4C=CC(C4)C3C2=O)cc1
135426834	1	COC(=O)c1ccc(=O)c2nc3/c(=C/O)c(O)cc(=O)c3[nH]c12
1922038	1	COCCCNC(=O)c1c(N)n(-c2ccc(S(N)(=O)=O)cc2)c2nc3ccccc3nc12
1929332	1	COc1ccc(C(=O)N/C(=C/c2cccc3ccccc23)C(=O)NCCc2c[nH]c3ccccc23)cc1OC
6470017	1	COc1ccc(C)cc1NC(=O)NCc1ccccn1
4436088	1	COc1ccc(-n2c(SCC(=O)NCC3CCCO3)nc3c([nH]c4ccccc43)c2=O)cc1
2350046	1	Cn1c(O)c(N=NC(=O)c2cc(-c3cccs3)nc3ccccc23)c2ccccc21
1563234	1	CCCOC(=O)c1cccc(NC(=O)COc2ccc([N+](=O)[O-])cc2)c1
3827697	1	COc1cc(C2C(C#N)=C(N)N(c3sc4c(c3C#N)CCCC4)C3=C2C(=O)CC(C)(C)C3)cc(OC)c1OC
650562	1	Cc1ccc(NC(=O)CSc2nnc(-c3ccc(S(=O)(=O)N4CCCC4)cc3)o2)cc1C
3231725	1	COc1ccc(Cn2cccc(NC(=O)Nc3cccc(C#N)c3)c2=O)cc1
939549	1	CCOC(=O)c1cnc(SCc2cccc3ccccc23)nc1N
804241	1	O=C(Nc1ccc2ccccc2c1)Nc1ccc2snnc2c1
2112396	1	CNS(=O)(=O)c1cccc(C(=O)OCC(=O)Nc2ccc(-c3nc4ccc(C)cc4s3)cc2)c1
2909852	1	CCOP(=O)(c1ccccc1)C(O)c1ccc(F)cc1
4780144	1	COCCn1cnnc1SCC(=O)Nc1cc(OC)c([N+](=O)[O-])cc1C
135401318	1	O=C(/C(=N/N=C/c1ccc(O)c(O)c1O)c1ccccc1)c1ccccc1
2096957	1	CCOC(=O)c1c(C)[nH]c(C(=O)COC(=O)CCS(=O)(=O)c2ccc(C)cc2)c1C
980277	1	Cn1nnnc1SCc1ccc(C(=O)Nc2ccc(Br)cc2)cc1
9551498	1	CO/C([O-])=N/c1c[n+](-c2ccc(Cl)cc2)no1
16190944	1	Cn1nccc1C(=O)N1CCCC(C(=O)c2cccc3ccccc23)C1
1235821	1	Cc1cc(NC(=O)CSc2nc(-c3ccc(Cl)cc3)cs2)no1
7205727	1	O=C(CSc1ccc(-c2ccccc2)nn1)c1ccccc1
4058958	1	COCCNC(=O)c1ccc(-n2c(SCc3cc(F)ccc3F)nc3ccccc3c2=O)cc1
16193672	1	CC1=CC2=NC(=O)/C(=C\c3cn(C)c4ccccc34)C(=N)N2O1
3925560	1	Cc1ccc2nc(-c3ccc(NC(=O)CN4C(=O)NC(C)(c5ccc(OC(F)F)cc5)C4=O)cc3)sc2c1
778905	1	Cc1ccc2cccc(NC(=S)NC(=O)c3ccnn3C)c2n1
2569452	1	COc1ccc(CNC(=S)N2CCN(S(=O)(=O)c3cccc(F)c3)CC2)cc1
[truncated: 313,670+ more rows]

## Sheet: 6. HIV
Bioactivity dataset 6. HIV
[truncated: 1,920 more rows]

[truncated: 3 more sheets: 7. IL-1β, 8. TNF-α, 9. CAL-27]
