# Supplementary material for: Development of Machine Learning Models for Precise Prediction of Bioactive Supramolecular Nucleoside Hydrogels
Source: Research Square preprint supplement (doi:10.21203/rs.3.rs-6888838/v1), 2025-07-10
Supplement: Supplementary file 9 [file 9568ff41947e4edb4b17d8f2.xlsx]

## Sheet: 1. Toxicology
Supplementary Data 4. The optimal combination of descriptors of each algorithm
Bioactivity dataset 1. Biological toxicology
Descriptprs-Original (n=2851)	Descriptprs-Wilcoxon (n=584)	Descriptprs-Spearman (n=148)	Descriptprs-RFE (XGBoost, n=47)	Descriptprs-DT (n=148)	Descriptprs-LR (n=129)	Descriptprs-RF (n=5)
MW	piID	piID	piID	piID	piID	MATS3p
AMW	piPC06	GATS1i	GATS1i	GATS1i	GATS1i	F07[C-F]
Sp	piPC05	C%	P_VSA_p_3	C%	C%	CATS2D_06_DD
Si	piPC07	P_VSA_p_3	LOGP99	P_VSA_p_3	P_VSA_p_3	nArNH2
Mp	piPC04	LOGP99	Mp	LOGP99	LOGP99	nRCO
Mi	piPC03	SpMax1_Bh(p)	P_VSA_charge_7	SpMax1_Bh(p)	SpMax1_Bh(p)
GD	piPC08	Mi	MATS1p	Mi	Mi
nAT	piPC09	Mp	SpMax1_Bh(m)	Mp	Mp
nSK	piPC02	P_VSA_charge_7	Fsp3	P_VSA_charge_7	P_VSA_charge_7
nAA	piPC10	MCD	GATS1m	MCD	MCD
nTA	PCD	MATS1p	P_VSA_MR_7	MATS1p	MATS1p
nBT	MeanDD	SpMax1_Bh(m)	SHED_DL	SpMax1_Bh(m)	SpMax1_Bh(m)
nBO	TPC	Fsp3	P_VSA_s_6	Fsp3	Fsp3
nBM	MPC05	P_VSA_LogP_3	nR10	P_VSA_LogP_3	P_VSA_LogP_3
SCBO	nCsp2	H%	nR09	H%	H%
RBN	GATS1i	JGI6	RBF	JGI6	PW2
RBF	Wap	PW2	P_VSA_LogP_8	PW2	GATS1m
nDB	MPC07	GATS1m	C-006	GATS1m	GATS8p
nTB	MPC06	GATS8p	nCconj	GATS8p	CATS2D_03_AL
nAB	MPC08	CATS2D_03_AL	P_VSA_LogP_4	CATS2D_03_AL	GATS7i
nH	piPC01	GATS7i	F04[C-N]	GATS7i	GATS2m
nC	SCBO	GATS2m	P_VSA_charge_11	GATS2m	CATS2D_04_AL
nN	nBM	LOC	nArOH	LOC	CATS2D_05_AL
nO	MPC09	CATS2D_04_AL	NaaaC	CATS2D_04_AL	P_VSA_LogP_5
nP	C%	CATS2D_05_AL	S3K	CATS2D_05_AL	P_VSA_charge_9
nS	TRS	P_VSA_LogP_5	O-057	P_VSA_LogP_5	C-025
nF	Rperim	P_VSA_charge_9	nR=Cs	P_VSA_charge_9	P_VSA_charge_6
nCL	MPC04	C-025	P_VSA_charge_10	C-025	CATS2D_02_AL
nBR	MPC03	P_VSA_charge_6	MATS1m	P_VSA_charge_6	P_VSA_s_3
nI	PW5	CATS2D_02_AL	P_VSA_charge_1	CATS2D_02_AL	Rbrid
nB	nR06	P_VSA_s_3	nArX	P_VSA_s_3	P_VSA_MR_7
nHM	nCIR	Rbrid	F06[C-N]	Rbrid	GATS4i
nHet	SpMax2_Bh(m)	P_VSA_MR_7	nCrt	P_VSA_MR_7	GATS6p
nX	nCIC	JGI4	F05[C-Cl]	JGI4	QED
H%	P_VSA_p_3	GATS4i	MDEC-44	GATS4i	P_VSA_s_6
C%	MWC05	SHED_DL	MaxdssC	SHED_DL	GATS5p
N%	P_VSA_v_3	GATS6p	P_VSA_charge_5	GATS6p	GATS7m
O%	MWC07	QED	C-040	QED	nR10
X%	MWC06	P_VSA_s_6	C-034	P_VSA_s_6	CATS2D_07_DL
nCsp3	LOGP99	GATS5p	C-039	GATS5p	GATS2p
nCsp2	MWC09	GATS7m	P_VSA_MR_8	GATS7m	SAscore
nCsp	MWC08	nR10	CATS2D_00_NN	nR10	nR09
Fsp3	MWC04	CATS2D_07_DL	nRNR2	CATS2D_07_DL	RBF
max_conj_path	SpMin1_Bh(i)	GATS2p	nArNO2	GATS2p	MATS7p
nStructures	TWC	CATS2D_06_DL	s4_relPathLength_2	CATS2D_06_DL	P_VSA_LogP_8
totalcharge	MWC03	SAscore	nArNH2	SAscore	SRW09
nCIC	MPC10	nR09	nRCO	nR09	C-006
nCIR	MWC10	RBF		RBF	nCconj
TRS	SRW08	MATS7p		MATS7p	CATS2D_08_DL
Rperim	SpMax1_Bh(p)	P_VSA_LogP_8		P_VSA_LogP_8	P_VSA_LogP_4
Rbrid	SRW06	SRW09		SRW09	GATS3m
MCD	SRW10	C-006		C-006	F04[C-N]
RFD	Pol	nCconj		nCconj	JGI5
RCI	GATS1p	CATS2D_08_DL		CATS2D_08_DL	SHED_AA
NRS	SpMax1_Bh(i)	P_VSA_LogP_4		P_VSA_LogP_4	GATS6m
NNRS	SpMax2_Bh(p)	GATS3m		GATS3m	P_VSA_LogP_2
nSpiro	MPC02	F04[C-N]		F04[C-N]	P_VSA_charge_11
nBridgeHead	P_VSA_ppp_L	JGI5		JGI5	MATS2m
nR03	P_VSA_e_2	SHED_AA		SHED_AA	nArOH
nR04	SRW04	GATS6m		GATS6m	MATS8i
nR05	D/Dtr06	P_VSA_LogP_2		P_VSA_LogP_2	MDEC-34
nR06	MWC02	P_VSA_charge_11		P_VSA_charge_11	minssCH2
nR07	F01[C-C]	MATS2m		MATS2m	NNRS
nR08	LOGPcons	nArOH		nArOH	NaaaC
nR09	ATS3m	MATS8i		MATS8i	nX
nR10	GGI4	MaxssCH2		MaxssCH2	MATS8m
nR11	MPC01	MDEC-34		MDEC-34	S3K
nR12	nBO	minssCH2		minssCH2	O-057
nBnz	SRW02	NNRS		NNRS	nR=Cs
ARR	MWC01	NaaaC		NaaaC	nDB
AP	max_conj_path	nX		nX	P_VSA_charge_10
D/Dtr03	MaxDD	MATS8m		MATS8m	P_VSA_m_4
D/Dtr04	ATS2m	S3K		S3K	CATS2D_09_DL
D/Dtr05	F02[C-C]	O-057		O-057	MATS1m
D/Dtr06	MR99	nR=Cs		nR=Cs	P_VSA_charge_1
D/Dtr07	MRcons	nDB		nDB	B10[O-O]
D/Dtr08	nCb-	minsOH		minsOH	CATS2D_00_DD
D/Dtr09	nCar	P_VSA_charge_10		P_VSA_charge_10	nArX
D/Dtr10	PW4	P_VSA_m_4		P_VSA_m_4	F06[C-N]
D/Dtr11	ATS4m	CATS2D_09_DL		CATS2D_09_DL	GATS4m
D/Dtr12	SpMin2_Bh(i)	MATS1m		MATS1m	nCq
Pol	nAB	P_VSA_charge_1		P_VSA_charge_1	NdssC
LPRS	nAA	B10[O-O]		B10[O-O]	MATS2p
MSD	CID	F04[C-Cl]		F04[C-Cl]	nLevel8
SPI	Mi	CATS2D_00_DD		CATS2D_00_DD	O%
ECC	P_VSA_i_2	nArX		nArX	GATS5m
AECC	Mp	F06[C-N]		F06[C-N]	nCrq
DECC	P_VSA_ppp_cyc	GATS4m		GATS4m	nCrt
MDDD	BID	nCq		nCq	F06[C-Cl]
UNIP	P_VSA_charge_7	NdssC		NdssC	NsCH3
CENT	MW	minsCH3		minsCH3	F05[C-Cl]
VAR	ATS5m	MATS2p		MATS2p	nR=Ct
ICR	nSK	nLevel8		nLevel8	s1_size
MaxTD	P_VSA_ppp_con	O%		O%	B04[C-C]
MeanTD	P_VSA_s_4	GATS5m		GATS5m	MDEC-44
MaxDD	F05[C-C]	minaasC		minaasC	MaxdssC
MeanDD	SpMax2_Bh(i)	nCrq		nCrq	JGI1
Wap	LPRS	nCrt		nCrt	T(N..Cl)
S1K	CATS2D_00_LL	F06[C-Cl]		F06[C-Cl]	P_VSA_LogP_6
S2K	P_VSA_MR_6	NsCH3		NsCH3	CATS2D_05_AA
S3K	ATS1m	F05[C-Cl]		F05[C-Cl]	MaxssO
PHI	F03[C-C]	JGI3		JGI3	s2_numSharedNeighbors
PW2	PW3	nR=Ct		nR=Ct	JGI2
PW3	nBnz	s1_size		s1_size	MATS7m
PW4	SpMax6_Bh(m)	CATS2D_06_AA		CATS2D_06_AA	s4_numSharedNeighbors
PW5	CATS2D_03_LL	B04[C-C]		B04[C-C]	MATS6m
MAXDN	nC	MDEC-44		MDEC-44	nArOR
MAXDP	CATS2D_05_LL	nCp		nCp	H-052
DELS	CATS2D_06_LL	O-060		O-060	C-005
BAC	NaasC	MaxdssC		MaxdssC	minssssC
LOC	SpMax3_Bh(m)	JGI1		JGI1	N-073
MWC01	GGI6	T(N..Cl)		T(N..Cl)	P_VSA_MR_5
MWC02	P_VSA_m_2	B03[C-C]		B03[C-C]	C-040
MWC03	SpMax7_Bh(m)	P_VSA_LogP_6		P_VSA_LogP_6	C-003
MWC04	F06[C-C]	CATS2D_05_AA		CATS2D_05_AA	MaxaaN
MWC05	UNIP	P_VSA_charge_5		P_VSA_charge_5	C-039
MWC06	MCD	MaxssO		MaxssO	O-056
MWC07	SpMax5_Bh(m)	s2_numSharedNeighbors		s2_numSharedNeighbors	P_VSA_MR_8
MWC08	GGI2	JGI2		JGI2	CATS2D_00_NN
MWC09	ECC	MATS7m		MATS7m	CATS2D_07_AA
MWC10	SpMin1_Bh(p)	s4_numSharedNeighbors		s4_numSharedNeighbors	T(Cl..Cl)
SRW02	RCI	MATS6m		MATS6m	nRNR2
SRW03	ATS2p	nArOR		nArOR	B05[N-N]
SRW04	F04[C-C]	H-052		H-052	nArNO2
SRW05	AP	C-005		C-005	s4_relPathLength_2
SRW06	ATS6m	minssssC		minssssC	F07[C-F]
SRW07	GGI5	N-073		N-073	CATS2D_06_DD
SRW08	GGI3	P_VSA_MR_5		P_VSA_MR_5	nArNH2
SRW09	ATS1p	C-040		C-040	nRCO
SRW10	CENT	C-003		C-003
MPC01	GD	MaxaaN		MaxaaN
MPC02	MATS1p	C-034		C-034
MPC03	SpMax4_Bh(m)	CATS2D_01_AA		CATS2D_01_AA
MPC04	SpMax8_Bh(m)	C-039		C-039
MPC05	ARR	O-056		O-056
MPC06	P_VSA_ppp_ar	P_VSA_MR_8		P_VSA_MR_8
MPC07	VAR	CATS2D_00_NN		CATS2D_00_NN
MPC08	ATS7m	CATS2D_07_AA		CATS2D_07_AA
MPC09	SpMax1_Bh(m)	T(Cl..Cl)		T(Cl..Cl)
MPC10	Fsp3	nRNR2		nRNR2
piPC01	ATS3p	B05[N-N]		B05[N-N]
piPC02	CATS2D_02_LL	nArNO2		nArNO2
piPC03	GGI7	s4_relPathLength_2		s4_relPathLength_2
piPC04	C-026	MATS3p		MATS3p
piPC05	NaaCH	F07[C-F]		F07[C-F]
piPC06	C-024	CATS2D_06_DD		CATS2D_06_DD
piPC07	SpMax6_Bh(p)	nArNH2		nArNH2
piPC08	F07[C-C]	nRCO		nRCO
piPC09	CATS2D_04_LL
piPC10	MDDD
TWC	SaaCH
TPC	SpMax7_Bh(p)
piID	nCbH
PCD	CATS2D_07_LL
CID	ATS4p
BID	JGI8
ATS1m	ATS5p
ATS2m	SHED_LL
ATS3m	NRS
ATS4m	SpMax8_Bh(p)
ATS5m	GGI8
ATS6m	ATS6p
ATS7m	MaxTD
ATS8m	MATS1i
ATS1p	Sp
ATS2p	ATS8m
ATS3p	SpMax5_Bh(p)
ATS4p	SpMin2_Bh(p)
ATS5p	AECC
ATS6p	P_VSA_LogP_3
ATS7p	ATS7p
ATS8p	ATSC7i
ATS1i	ATSC5p
ATS2i	ATSC7p
ATS3i	ATSC6p
ATS4i	ATSC5i
ATS5i	CATS2D_01_LL
ATS6i	MeanTD
ATS7i	ATSC8p
ATS8i	ATSC6i
ATSC1m	H%
ATSC2m	ATSC8i
ATSC3m	SpMin6_Bh(i)
ATSC4m	JGI7
ATSC5m	ATSC4i
ATSC6m	MSD
ATSC7m	JGI6
ATSC8m	SpMin7_Bh(i)
ATSC1p	ATS8p
ATSC2p	PW2
ATSC3p	GATS1m
ATSC4p	ATSC4p
ATSC5p	ICR
ATSC6p	GATS8p
ATSC7p	SpMax3_Bh(p)
ATSC8p	ATSC8m
ATSC1i	SpMin5_Bh(i)
ATSC2i	GATS8i
ATSC3i	ATSC3i
ATSC4i	CATS2D_03_AL
ATSC5i	SpMin3_Bh(i)
ATSC6i	SpMax4_Bh(p)
ATSC7i	MaxaaCH
ATSC8i	SpMax7_Bh(i)
MATS1m	SpMax8_Bh(i)
MATS2m	F08[C-C]
MATS3m	GGI1
MATS4m	GATS7i
MATS5m	ATSC7m
MATS6m	SpMin2_Bh(m)
MATS7m	JGI9
MATS8m	ATSC5m
MATS1p	S1K
MATS2p	SpMax6_Bh(i)
MATS3p	GATS8m
MATS4p	ATSC6m
MATS5p	SHED_AL
MATS6p	GATS2m
MATS7p	GATS7p
MATS8p	SpMin8_Bh(i)
MATS1i	ATSC3p
MATS2i	SpMin8_Bh(p)
MATS3i	LOC
MATS4i	nBT
MATS5i	B08[C-C]
MATS6i	GGI9
MATS7i	DECC
MATS8i	CATS2D_07_AL
GATS1m	CATS2D_04_AL
GATS2m	SpMin4_Bh(i)
GATS3m	B07[C-C]
GATS4m	CATS2D_05_AL
GATS5m	SpMin8_Bh(m)
GATS6m	SPI
GATS7m	P_VSA_LogP_5
GATS8m	SpMin7_Bh(p)
GATS1p	SpMax3_Bh(i)
GATS2p	ATS8i
GATS3p	SpMin1_Bh(m)
GATS4p	ATSC2i
GATS5p	P_VSA_charge_9
GATS6p	SpMax5_Bh(i)
GATS7p	SaasC
GATS8p	ATS1i
GATS1i	C-025
GATS2i	ATS7i
GATS3i	SpMin7_Bh(m)
GATS4i	minaaCH
GATS5i	SpMin6_Bh(p)
GATS6i	P_VSA_charge_6
GATS7i	ATSC4m
GATS8i	CATS2D_02_AL
GGI1	SpMin3_Bh(p)
GGI2	CATS2D_06_AL
GGI3	CATS2D_08_LL
GGI4	CATS2D_08_AL
GGI5	MaxaasC
GGI6	P_VSA_s_3
GGI7	nAT
GGI8	AMW
GGI9	SpMax4_Bh(i)
GGI10	SpMin6_Bh(m)
JGI1	Rbrid
JGI2	P_VSA_MR_7
JGI3	F07[C-O]
JGI4	RFD
JGI5	ATSC1i
JGI6	F08[C-O]
JGI7	ATS6i
JGI8	Si
JGI9	JGI4
JGI10	SpMin5_Bh(p)
JGT	GATS4i
SpMax1_Bh(m)	F09[C-C]
SpMax2_Bh(m)	ATSC2p
SpMax3_Bh(m)	B09[C-C]
SpMax4_Bh(m)	SHED_DL
SpMax5_Bh(m)	DELS
SpMax6_Bh(m)	SpMin4_Bh(p)
SpMax7_Bh(m)	F06[C-O]
SpMax8_Bh(m)	ATS5i
SpMax1_Bh(p)	CATS2D_03_DL
SpMax2_Bh(p)	CATS2D_09_AL
SpMax3_Bh(p)	F09[C-O]
SpMax4_Bh(p)	JGI10
SpMax5_Bh(p)	GATS6p
SpMax6_Bh(p)	B08[C-O]
SpMax7_Bh(p)	QED
SpMax8_Bh(p)	GATS4p
SpMax1_Bh(i)	B06[C-C]
SpMax2_Bh(i)	ATSC3m
SpMax3_Bh(i)	F05[C-O]
SpMax4_Bh(i)	B09[C-O]
SpMax5_Bh(i)	SpMin3_Bh(m)
SpMax6_Bh(i)	CATS2D_09_LL
SpMax7_Bh(i)	P_VSA_s_6
SpMax8_Bh(i)	SpMin5_Bh(m)
SpMin1_Bh(m)	MAXDP
SpMin2_Bh(m)	GGI10
SpMin3_Bh(m)	CATS2D_02_DL
SpMin4_Bh(m)	B07[C-O]
SpMin5_Bh(m)	QEDu
SpMin6_Bh(m)	GATS5p
SpMin7_Bh(m)	GATS6i
SpMin8_Bh(m)	GATS7m
SpMin1_Bh(p)	ATS3i
SpMin2_Bh(p)	nR10
SpMin3_Bh(p)	CATS2D_07_DL
SpMin4_Bh(p)	D/Dtr10
SpMin5_Bh(p)	CATS2D_04_DL
SpMin6_Bh(p)	ATS2i
SpMin7_Bh(p)	ATS4i
SpMin8_Bh(p)	GATS2p
SpMin1_Bh(i)	B10[C-C]
SpMin2_Bh(i)	CATS2D_06_DL
SpMin3_Bh(i)	ATSC1p
SpMin4_Bh(i)	H-047
SpMin5_Bh(i)	SAscore
SpMin6_Bh(i)	SpMin4_Bh(m)
SpMin7_Bh(i)	F10[C-C]
SpMin8_Bh(i)	nR09
P_VSA_LogP_1	D/Dtr09
P_VSA_LogP_2	nHet
P_VSA_LogP_3	CATS2D_05_DL
P_VSA_LogP_4	F04[C-O]
P_VSA_LogP_5	F03[C-O]
P_VSA_LogP_6	B06[C-O]
P_VSA_LogP_7	B05[C-C]
P_VSA_LogP_8	B10[C-O]
P_VSA_MR_1	P_VSA_ppp_ter
P_VSA_MR_2	RBF
P_VSA_MR_3	F10[C-O]
P_VSA_MR_4	MATS7p
P_VSA_MR_5	P_VSA_LogP_8
P_VSA_MR_6	SRW09
P_VSA_MR_7	C-006
P_VSA_MR_8	SRW07
P_VSA_m_1	nCconj
P_VSA_m_2	S2K
P_VSA_m_3	CATS2D_08_DL
P_VSA_m_4	P_VSA_LogP_4
P_VSA_m_5	F02[C-O]
P_VSA_v_1	D/Dtr05
P_VSA_v_2	GATS5i
P_VSA_v_3	mindO
P_VSA_v_4	GATS3m
P_VSA_e_1	nR05
P_VSA_e_2	SRW05
P_VSA_e_3	MaxdO
P_VSA_e_4	F04[C-N]
P_VSA_e_5	MATS7i
P_VSA_e_6	F03[C-N]
P_VSA_p_1	P_VSA_v_2
P_VSA_p_2	GATS2i
P_VSA_p_3	JGI5
P_VSA_p_4	SHED_AA
P_VSA_i_1	P_VSA_p_2
P_VSA_i_2	GATS6m
P_VSA_i_3	P_VSA_LogP_2
P_VSA_i_4	P_VSA_charge_11
P_VSA_s_1	MATS2m
P_VSA_s_2	nArOH
P_VSA_s_3	P_VSA_i_3
P_VSA_s_4	MATS8i
P_VSA_s_5	MaxssCH2
P_VSA_s_6	MATS3m
P_VSA_ppp_L	MATS8p
P_VSA_ppp_P	MDEC-34
P_VSA_ppp_N	P_VSA_MR_1
P_VSA_ppp_D	ATSC2m
P_VSA_ppp_A	minssCH2
P_VSA_ppp_ar	MATS4i
P_VSA_ppp_con	NNRS
P_VSA_ppp_hal	MATS4p
P_VSA_ppp_cyc	NaaaC
P_VSA_ppp_ter	P_VSA_ppp_A
P_VSA_charge_1	SaaaC
P_VSA_charge_2	minaaaC
P_VSA_charge_3	MaxaaaC
P_VSA_charge_4	NssCH2
P_VSA_charge_5	nX
P_VSA_charge_6	MATS8m
P_VSA_charge_7	S3K
P_VSA_charge_8	B04[C-N]
P_VSA_charge_9	O-057
P_VSA_charge_10	nR=Cs
P_VSA_charge_11	B05[C-O]
P_VSA_charge_12	nDB
P_VSA_charge_13	minsOH
P_VSA_charge_14	MaxsOH
nCp	P_VSA_ppp_hal
nCs	P_VSA_charge_10
nCt	MDEC-24
nCq	P_VSA_m_4
nCrs	T(O..O)
nCrt	SssCH2
nCrq	C-016
nCar	nCsp3
nCbH	nHAcc
nCb-	CATS2D_09_DL
nCconj	MATS1m
nR=Cp	P_VSA_charge_1
nR=Cs	B10[O-O]
nR=Ct	F04[C-Cl]
n=C=	CATS2D_00_DD
nR#CH/X	X%
nR#C-	CATS2D_00_AA
nROCN	nArX
nArOCN	F10[O-O]
nRNCO	F02[C-N]
nArNCO	F06[C-N]
nRSCN	B06[C-N]
nArSCN	P_VSA_ppp_D
nRNCS	B04[C-Cl]
nArNCS	GATS4m
nRCOOH	nCq
nArCOOH	C-004
nRCOOR	nHM
nArCOOR	P_VSA_LogP_7
nRCONH2	NdssC
nArCONH2	minsCH3
nRCONHR	MATS6p
nArCONHR	SdsCH
nRCONR2	MATS2p
nArCONR2	NssssC
nROCON	nLevel8
nArOCON	nHDon
nRCOX	nLevel7
nArCOX	O%
nRCSOH	P_VSA_i_4
nArCSOH	nLevel9
nRCSSH	GATS5m
nArCSSH	MaxdsCH
nRCOSR	minaasC
nArCOSR	NdsCH
nRCSSR	mindsCH
nArCSSR	P_VSA_m_3
nRCHO	H-050
nArCHO	ATSC1m
nRCO	SHED_DA
nArCO	F03[C-Cl]
nCONN	nCrq
nC=O(O)2	nCrt
nN=C-N<	F02[C-Cl]
nC(=N)N2	MaxsCl
nRC=N	F06[C-Cl]
nArC=N	minsCl
nRCNO	NsCH3
nArCNO	SdO
nRNH2	F05[C-Cl]
nArNH2	JGI3
nRNHR	nH
nArNHR	P_VSA_p_1
nRNR2	B06[C-Cl]
nArNR2	P_VSA_e_5
nN-N	SsOH
nN=N	nR=Ct
nRCN	C-017
nArCN	B03[C-N]
nN+	F07[C-Cl]
nNq	B05[C-Cl]
nRNHO	s1_size
nArNHO	Cl-089
nRNNOx	SsCl
nArNNOx	B02[C-Cl]
nRNO	s1_relSize
nArNO	B03[C-Cl]
nRNO2	SsCH3
nArNO2	B07[C-Cl]
nN(CO)2	CATS2D_06_AA
nC=N-N<	B04[C-C]
nROH	MaxsCH3
nArOH	nLevel6
nOHp	MDEC-14
nOHs	MDEC-44
nOHt	nCp
nROR	O-060
nArOR	F05[C-N]
nROX	B04[C-O]
nArOX	nCL
nO(C=O)2	MaxdssC
nH2O	nCs
nSH	NsCl
nC=S	F01[C-Cl]
nRSR	B07[C-N]
nRSSR	P_VSA_e_1
nSO	JGI1
nS(=O)2	P_VSA_s_2
nSOH	T(N..Cl)
nSOOH	P_VSA_m_1
nSO2OH	P_VSA_v_1
nSO3OH	P_VSA_e_4
nSO2	F07[C-N]
nSO3	B03[C-C]
nSO4	P_VSA_LogP_6
nSO2N	CATS2D_05_AA
nPO3	MATS6i
nPO4	P_VSA_charge_5
nPR3	B01[C-Cl]
nP(=O)O2R	MATS4m
nP(=O)R3/nPR5	B08[C-N]
nCH2RX	MaxssO
nCHR2X	F08[C-Cl]
nCR3X	nN
nR=CHX	nTA
nR=CRX	B08[C-Cl]
nR#CX	s2_numSharedNeighbors
nCHRX2	P_VSA_e_3
nCR2X2	nROH
nR=CX2	JGI2
nCRX3	B05[C-N]
nArX	T(O..Cl)
nCXr	MATS7m
nCXr=	s4_numSharedNeighbors
nCconjX	MATS6m
nAziridines	F08[C-N]
nOxiranes	nArOR
nThiranes	H-052
nAzetidines	minssO
nOxetanes	SdssC
nThioethanes	C-005
nBeta-Lactams	P_VSA_LogP_1
nPyrrolidines	minssssC
nOxolanes	F01[C-O]
ntH-Thiophenes	C-002
nPyrroles	B03[C-O]
nPyrazoles	B02[C-N]
nImidazoles	B06[O-O]
nFuranes	nO
nThiophenes	F06[O-O]
nOxazoles	T(N..N)
nIsoxazoles	N-073
nThiazoles	P_VSA_MR_5
nIsothiazoles	C-040
nTriazoles	C-003
nPyridines	MaxaaN
nPyridazines	P_VSA_charge_8
nPyrimidines	minaaN
nPyrazines	CATS2D_00_DA
n135-Triazines	NsOH
n124-Triazines	C-034
nHDon	CATS2D_01_AA
nHAcc	N%
C-001	s3_numSharedNeighbors
C-002	C-039
C-003	N-075
C-004	SssssC
C-005	B01[C-N]
C-006	nArCO
C-007	nLevel5
C-008	SaaN
C-009	O-056
C-010	P_VSA_MR_8
C-011	CATS2D_00_NN
C-012	NaaN
C-013	CATS2D_07_AA
C-014	T(Cl..Cl)
C-015	P_VSA_ppp_N
C-016	SHED_AN
C-017	nRNR2
C-018	ringChiralCenter
C-019	B05[N-N]
C-020	nCt
C-021	F05[N-N]
C-022	nArNO2
C-023	s4_relPathLength_2
C-024	N-068
C-025	MATS3p
C-026	F07[C-F]
C-027	B07[C-F]
C-028	F09[C-Cl]
C-029	s2_pathLength
C-030	B09[C-Cl]
C-031	CATS2D_06_DD
C-032	N-076
C-033	nArNH2
C-034	nRCO
C-035	SHED_DN
C-036	MAXDN
C-037	SssO
C-038	T(O..F)
C-039	F01[C-N]
C-040	N-069
C-041	JGT
C-042
C-043
C-044
H-046
H-047
H-048
H-049
H-050
H-051
H-052
H-053
H-054
H-055
O-056
O-057
O-058
O-059
O-060
O-061
O-062
O-063
Se-064
Se-065
N-066
N-067
N-068
N-069
N-070
N-071
N-072
N-073
N-074
N-075
N-076
N-077
N-078
N-079
F-081
F-082
F-083
F-084
F-085
Cl-086
Cl-087
Cl-088
Cl-089
Cl-090
Br-091
Br-092
Br-093
Br-094
Br-095
I-096
I-097
I-098
I-099
I-100
F-101
Cl-102
Br-103
I-104
S-106
S-107
S-108
S-109
S-110
Si-111
B-112
P-115
P-116
P-117
P-118
P-119
P-120
SsCH3
SdCH2
SssCH2
StCH
SdsCH
SaaCH
SsssCH
SddC
StsC
SdssC
SaasC
SaaaC
SssssC
SsNH2
SssNH
SdNH
SsssN
SdsN
SaaN
StN
SsNH3+
SssNH2+
SdNH2+
SsssNH+
SssssN+
SddsN
SaadN
SaasN
SaaNH
SsOH
SdO
SssO
SaaO
SsPH2
SssPH
SsssP
SdsssP
SddsP
SsssssP
SsSH
SdS
SssS
SaaS
SdssS
SddssS
SssssssS
SsF
SsCl
SsBr
SsI
SsLi
SssBe
SssssBe-
SsBH2
SssBH
SsssB
SssssB-
SsGeH3
SssGeH2
SsssGeH
SssssGe
SsAsH2
SssAsH
SsssAs
SsssssAs
SdsssAs
SddsAs
SsSeH
SdSe
SssSe
SaaSe
SdssSe
SssssssSe
SddssSe
SsSnH3
SssSnH2
SsssSnH
SssssSn
SsPbH3
SssPbH2
SsssPbH
SssssPb
SsSiH3
SssSiH2
SsssSiH
SssssSi
NsCH3
NdCH2
NssCH2
NtCH
NdsCH
NaaCH
NsssCH
NddC
NtsC
NdssC
NaasC
NaaaC
NssssC
NsNH2
NssNH
NdNH
NsssN
NdsN
NaaN
NtN
NsNH3+
NssNH2+
NdNH2+
NsssNH+
NssssN+
NddsN
NaadN
NaasN
NaaNH
NsOH
NdO
NssO
NaaO
NsPH2
NssPH
NsssP
NdsssP
NddsP
NsssssP
NsSH
NdS
NssS
NaaS
NdssS
NddssS
NssssssS
NsF
NsCl
NsBr
NsI
NsLi
NssBe
NssssBe-
NsBH2
NssBH
NsssB
NssssB-
NsGeH3
NssGeH2
NsssGeH
NssssGe
NsAsH2
NssAsH
NsssAs
NsssssAs
NdsssAs
NddsAs
NsSeH
NdSe
NssSe
NaaSe
NdssSe
NssssssSe
NddssSe
NsSnH3
NssSnH2
NsssSnH
NssssSn
NsPbH3
NssPbH2
NsssPbH
NssssPb
NsSiH3
NssSiH2
NsssSiH
NssssSi
minsCH3
mindCH2
minssCH2
mintCH
mindsCH
minaaCH
minsssCH
minddC
mintsC
mindssC
minaasC
minaaaC
minssssC
minsNH2
minssNH
mindNH
minsssN
mindsN
minaaN
mintN
minsNH3+
minssNH2+
mindNH2+
minsssNH+
minssssN+
minddsN
minaadN
minaasN
minaaNH
minsOH
mindO
minssO
minaaO
minsPH2
minssPH
minsssP
mindsssP
minddsP
minsssssP
minsSH
mindS
minssS
minaaS
mindssS
minddssS
minssssssS
minsF
minsCl
minsBr
minsI
minsLi
minssBe
minssssBe-
minsBH2
minssBH
minsssB
minssssB-
minsGeH3
minssGeH2
minsssGeH
minssssGe
minsAsH2
minssAsH
minsssAs
minsssssAs
mindsssAs
minddsAs
minsSeH
mindSe
minssSe
minaaSe
mindssSe
minssssssSe
minddssSe
minsSnH3
minssSnH2
minsssSnH
minssssSn
minsPbH3
minssPbH2
minsssPbH
minssssPb
minsSiH3
minssSiH2
minsssSiH
minssssSi
MaxsCH3
MaxdCH2
MaxssCH2
MaxtCH
MaxdsCH
MaxaaCH
MaxsssCH
MaxddC
MaxtsC
MaxdssC
MaxaasC
MaxaaaC
MaxssssC
MaxsNH2
MaxssNH
MaxdNH
MaxsssN
MaxdsN
MaxaaN
MaxtN
MaxsNH3+
MaxssNH2+
MaxdNH2+
MaxsssNH+
MaxssssN+
MaxddsN
MaxaadN
MaxaasN
MaxaaNH
MaxsOH
MaxdO
MaxssO
MaxaaO
MaxsPH2
MaxssPH
MaxsssP
MaxdsssP
MaxddsP
MaxsssssP
MaxsSH
MaxdS
MaxssS
MaxaaS
MaxdssS
MaxddssS
MaxssssssS
MaxsF
MaxsCl
MaxsBr
MaxsI
MaxsLi
MaxssBe
MaxssssBe-
MaxsBH2
MaxssBH
MaxsssB
MaxssssB-
MaxsGeH3
MaxssGeH2
MaxsssGeH
MaxssssGe
MaxsAsH2
MaxssAsH
MaxsssAs
MaxsssssAs
MaxdsssAs
MaxddsAs
MaxsSeH
MaxdSe
MaxssSe
MaxaaSe
MaxdssSe
MaxssssssSe
MaxddssSe
MaxsSnH3
MaxssSnH2
MaxsssSnH
MaxssssSn
MaxsPbH3
MaxssPbH2
MaxsssPbH
MaxssssPb
MaxsSiH3
MaxssSiH2
MaxsssSiH
MaxssssSi
CATS2D_00_DD
CATS2D_01_DD
CATS2D_02_DD
CATS2D_03_DD
CATS2D_04_DD
CATS2D_05_DD
CATS2D_06_DD
CATS2D_07_DD
CATS2D_08_DD
CATS2D_09_DD
CATS2D_00_DA
CATS2D_01_DA
CATS2D_02_DA
CATS2D_03_DA
CATS2D_04_DA
CATS2D_05_DA
CATS2D_06_DA
CATS2D_07_DA
CATS2D_08_DA
CATS2D_09_DA
CATS2D_00_DP
CATS2D_01_DP
CATS2D_02_DP
CATS2D_03_DP
CATS2D_04_DP
CATS2D_05_DP
CATS2D_06_DP
CATS2D_07_DP
CATS2D_08_DP
CATS2D_09_DP
CATS2D_00_DN
CATS2D_01_DN
CATS2D_02_DN
CATS2D_03_DN
CATS2D_04_DN
CATS2D_05_DN
CATS2D_06_DN
CATS2D_07_DN
CATS2D_08_DN
CATS2D_09_DN
CATS2D_00_DL
CATS2D_01_DL
CATS2D_02_DL
CATS2D_03_DL
CATS2D_04_DL
CATS2D_05_DL
CATS2D_06_DL
CATS2D_07_DL
CATS2D_08_DL
CATS2D_09_DL
CATS2D_00_AA
CATS2D_01_AA
CATS2D_02_AA
CATS2D_03_AA
CATS2D_04_AA
CATS2D_05_AA
CATS2D_06_AA
CATS2D_07_AA
CATS2D_08_AA
CATS2D_09_AA
CATS2D_00_AP
CATS2D_01_AP
CATS2D_02_AP
CATS2D_03_AP
CATS2D_04_AP
CATS2D_05_AP
CATS2D_06_AP
CATS2D_07_AP
CATS2D_08_AP
CATS2D_09_AP
CATS2D_00_AN
CATS2D_01_AN
CATS2D_02_AN
CATS2D_03_AN
CATS2D_04_AN
CATS2D_05_AN
CATS2D_06_AN
CATS2D_07_AN
CATS2D_08_AN
CATS2D_09_AN
CATS2D_00_AL
CATS2D_01_AL
CATS2D_02_AL
CATS2D_03_AL
CATS2D_04_AL
CATS2D_05_AL
CATS2D_06_AL
CATS2D_07_AL
CATS2D_08_AL
CATS2D_09_AL
CATS2D_00_PP
CATS2D_01_PP
CATS2D_02_PP
CATS2D_03_PP
CATS2D_04_PP
CATS2D_05_PP
CATS2D_06_PP
CATS2D_07_PP
CATS2D_08_PP
CATS2D_09_PP
CATS2D_00_PN
CATS2D_01_PN
CATS2D_02_PN
CATS2D_03_PN
CATS2D_04_PN
CATS2D_05_PN
CATS2D_06_PN
CATS2D_07_PN
CATS2D_08_PN
CATS2D_09_PN
CATS2D_00_PL
CATS2D_01_PL
CATS2D_02_PL
CATS2D_03_PL
CATS2D_04_PL
CATS2D_05_PL
CATS2D_06_PL
CATS2D_07_PL
CATS2D_08_PL
CATS2D_09_PL
CATS2D_00_NN
CATS2D_01_NN
CATS2D_02_NN
CATS2D_03_NN
CATS2D_04_NN
CATS2D_05_NN
CATS2D_06_NN
CATS2D_07_NN
CATS2D_08_NN
CATS2D_09_NN
CATS2D_00_NL
CATS2D_01_NL
CATS2D_02_NL
CATS2D_03_NL
CATS2D_04_NL
CATS2D_05_NL
CATS2D_06_NL
CATS2D_07_NL
CATS2D_08_NL
CATS2D_09_NL
CATS2D_00_LL
CATS2D_01_LL
CATS2D_02_LL
CATS2D_03_LL
CATS2D_04_LL
CATS2D_05_LL
CATS2D_06_LL
CATS2D_07_LL
CATS2D_08_LL
CATS2D_09_LL
SHED_DD
SHED_DA
SHED_DP
SHED_DN
SHED_DL
SHED_AA
SHED_AP
SHED_AN
SHED_AL
SHED_PP
SHED_PN
SHED_PL
SHED_NN
SHED_NL
SHED_LL
T(N..N)
T(N..O)
T(N..S)
T(N..P)
T(N..F)
T(N..Cl)
T(N..Br)
T(N..I)
T(O..O)
T(O..S)
T(O..P)
T(O..F)
T(O..Cl)
T(O..Br)
T(O..I)
T(S..S)
T(S..P)
T(S..F)
T(S..Cl)
T(S..Br)
T(S..I)
T(P..P)
T(P..F)
T(P..Cl)
T(P..Br)
T(P..I)
T(F..F)
T(F..Cl)
T(F..Br)
T(F..I)
T(Cl..Cl)
T(Cl..Br)
T(Cl..I)
T(Br..Br)
T(Br..I)
T(I..I)
B01[C-C]
B01[C-N]
B01[C-O]
B01[C-S]
B01[C-P]
B01[C-F]
B01[C-Cl]
B01[C-Br]
B01[C-I]
B01[C-B]
B01[C-Si]
B01[C-X]
B01[N-N]
B01[N-O]
B01[N-S]
B01[N-P]
B01[N-F]
B01[N-Cl]
B01[N-Br]
B01[N-I]
B01[N-B]
B01[N-Si]
B01[N-X]
B01[O-O]
B01[O-S]
B01[O-P]
B01[O-F]
B01[O-Cl]
B01[O-Br]
B01[O-I]
B01[O-B]
B01[O-Si]
B01[O-X]
B01[S-S]
B01[S-P]
B01[S-F]
B01[S-Cl]
B01[S-Br]
B01[S-I]
B01[S-B]
B01[S-Si]
B01[S-X]
B01[P-P]
B01[P-F]
B01[P-Cl]
B01[P-Br]
B01[P-I]
B01[P-B]
B01[P-Si]
B01[P-X]
B01[F-F]
B01[F-Cl]
B01[F-Br]
B01[F-I]
B01[F-B]
B01[F-Si]
B01[F-X]
B01[Cl-Cl]
B01[Cl-Br]
B01[Cl-I]
B01[Cl-B]
B01[Cl-Si]
B01[Cl-X]
B01[Br-Br]
B01[Br-I]
B01[Br-B]
B01[Br-Si]
B01[Br-X]
B01[I-I]
B01[I-B]
B01[I-Si]
B01[I-X]
B01[B-B]
B01[B-Si]
B01[B-X]
B01[Si-Si]
B01[Si-X]
B01[X-X]
B02[C-C]
B02[C-N]
B02[C-O]
B02[C-S]
B02[C-P]
B02[C-F]
B02[C-Cl]
B02[C-Br]
B02[C-I]
B02[C-B]
B02[C-Si]
B02[C-X]
B02[N-N]
B02[N-O]
B02[N-S]
B02[N-P]
B02[N-F]
B02[N-Cl]
B02[N-Br]
B02[N-I]
B02[N-B]
B02[N-Si]
B02[N-X]
B02[O-O]
B02[O-S]
B02[O-P]
B02[O-F]
B02[O-Cl]
B02[O-Br]
B02[O-I]
B02[O-B]
B02[O-Si]
B02[O-X]
B02[S-S]
B02[S-P]
B02[S-F]
B02[S-Cl]
B02[S-Br]
B02[S-I]
B02[S-B]
B02[S-Si]
B02[S-X]
B02[P-P]
B02[P-F]
B02[P-Cl]
B02[P-Br]
B02[P-I]
B02[P-B]
B02[P-Si]
B02[P-X]
B02[F-F]
B02[F-Cl]
B02[F-Br]
B02[F-I]
B02[F-B]
B02[F-Si]
B02[F-X]
B02[Cl-Cl]
B02[Cl-Br]
B02[Cl-I]
B02[Cl-B]
B02[Cl-Si]
B02[Cl-X]
B02[Br-Br]
B02[Br-I]
B02[Br-B]
B02[Br-Si]
B02[Br-X]
B02[I-I]
B02[I-B]
B02[I-Si]
B02[I-X]
B02[B-B]
B02[B-Si]
B02[B-X]
B02[Si-Si]
B02[Si-X]
B02[X-X]
B03[C-C]
B03[C-N]
B03[C-O]
B03[C-S]
B03[C-P]
B03[C-F]
B03[C-Cl]
B03[C-Br]
B03[C-I]
B03[C-B]
B03[C-Si]
B03[C-X]
B03[N-N]
B03[N-O]
B03[N-S]
B03[N-P]
B03[N-F]
B03[N-Cl]
B03[N-Br]
B03[N-I]
B03[N-B]
B03[N-Si]
B03[N-X]
B03[O-O]
B03[O-S]
B03[O-P]
B03[O-F]
B03[O-Cl]
B03[O-Br]
B03[O-I]
B03[O-B]
B03[O-Si]
B03[O-X]
B03[S-S]
B03[S-P]
B03[S-F]
B03[S-Cl]
B03[S-Br]
B03[S-I]
B03[S-B]
B03[S-Si]
B03[S-X]
B03[P-P]
B03[P-F]
B03[P-Cl]
B03[P-Br]
B03[P-I]
B03[P-B]
B03[P-Si]
B03[P-X]
B03[F-F]
B03[F-Cl]
B03[F-Br]
B03[F-I]
B03[F-B]
B03[F-Si]
B03[F-X]
B03[Cl-Cl]
B03[Cl-Br]
B03[Cl-I]
B03[Cl-B]
B03[Cl-Si]
B03[Cl-X]
B03[Br-Br]
B03[Br-I]
B03[Br-B]
B03[Br-Si]
B03[Br-X]
B03[I-I]
B03[I-B]
B03[I-Si]
B03[I-X]
B03[B-B]
B03[B-Si]
B03[B-X]
B03[Si-Si]
B03[Si-X]
B03[X-X]
B04[C-C]
B04[C-N]
B04[C-O]
B04[C-S]
B04[C-P]
B04[C-F]
B04[C-Cl]
B04[C-Br]
B04[C-I]
B04[C-B]
B04[C-Si]
B04[C-X]
B04[N-N]
B04[N-O]
B04[N-S]
B04[N-P]
B04[N-F]
B04[N-Cl]
B04[N-Br]
B04[N-I]
B04[N-B]
B04[N-Si]
B04[N-X]
B04[O-O]
B04[O-S]
B04[O-P]
B04[O-F]
B04[O-Cl]
B04[O-Br]
B04[O-I]
B04[O-B]
B04[O-Si]
B04[O-X]
B04[S-S]
B04[S-P]
B04[S-F]
B04[S-Cl]
B04[S-Br]
B04[S-I]
B04[S-B]
B04[S-Si]
B04[S-X]
B04[P-P]
B04[P-F]
B04[P-Cl]
B04[P-Br]
B04[P-I]
B04[P-B]
B04[P-Si]
B04[P-X]
B04[F-F]
B04[F-Cl]
B04[F-Br]
B04[F-I]
B04[F-B]
B04[F-Si]
B04[F-X]
B04[Cl-Cl]
B04[Cl-Br]
B04[Cl-I]
B04[Cl-B]
B04[Cl-Si]
B04[Cl-X]
B04[Br-Br]
B04[Br-I]
B04[Br-B]
B04[Br-Si]
B04[Br-X]
B04[I-I]
B04[I-B]
B04[I-Si]
B04[I-X]
B04[B-B]
B04[B-Si]
B04[B-X]
B04[Si-Si]
B04[Si-X]
B04[X-X]
B05[C-C]
B05[C-N]
B05[C-O]
B05[C-S]
B05[C-P]
B05[C-F]
B05[C-Cl]
B05[C-Br]
B05[C-I]
B05[C-B]
B05[C-Si]
B05[C-X]
B05[N-N]
B05[N-O]
B05[N-S]
B05[N-P]
B05[N-F]
B05[N-Cl]
B05[N-Br]
B05[N-I]
B05[N-B]
B05[N-Si]
B05[N-X]
B05[O-O]
B05[O-S]
B05[O-P]
B05[O-F]
B05[O-Cl]
B05[O-Br]
B05[O-I]
B05[O-B]
B05[O-Si]
B05[O-X]
B05[S-S]
B05[S-P]
B05[S-F]
B05[S-Cl]
B05[S-Br]
B05[S-I]
B05[S-B]
B05[S-Si]
B05[S-X]
B05[P-P]
B05[P-F]
B05[P-Cl]
B05[P-Br]
B05[P-I]
B05[P-B]
B05[P-Si]
B05[P-X]
B05[F-F]
B05[F-Cl]
B05[F-Br]
B05[F-I]
B05[F-B]
B05[F-Si]
B05[F-X]
B05[Cl-Cl]
B05[Cl-Br]
B05[Cl-I]
B05[Cl-B]
B05[Cl-Si]
B05[Cl-X]
B05[Br-Br]
B05[Br-I]
B05[Br-B]
B05[Br-Si]
B05[Br-X]
B05[I-I]
B05[I-B]
B05[I-Si]
B05[I-X]
B05[B-B]
B05[B-Si]
B05[B-X]
B05[Si-Si]
B05[Si-X]
B05[X-X]
B06[C-C]
B06[C-N]
B06[C-O]
B06[C-S]
B06[C-P]
B06[C-F]
B06[C-Cl]
B06[C-Br]
B06[C-I]
B06[C-B]
B06[C-Si]
B06[C-X]
B06[N-N]
B06[N-O]
B06[N-S]
B06[N-P]
B06[N-F]
B06[N-Cl]
B06[N-Br]
B06[N-I]
B06[N-B]
B06[N-Si]
B06[N-X]
B06[O-O]
B06[O-S]
B06[O-P]
B06[O-F]
B06[O-Cl]
B06[O-Br]
B06[O-I]
B06[O-B]
B06[O-Si]
B06[O-X]
B06[S-S]
B06[S-P]
B06[S-F]
B06[S-Cl]
B06[S-Br]
B06[S-I]
B06[S-B]
B06[S-Si]
B06[S-X]
B06[P-P]
B06[P-F]
B06[P-Cl]
B06[P-Br]
B06[P-I]
B06[P-B]
B06[P-Si]
B06[P-X]
B06[F-F]
B06[F-Cl]
B06[F-Br]
B06[F-I]
B06[F-B]
B06[F-Si]
B06[F-X]
B06[Cl-Cl]
B06[Cl-Br]
B06[Cl-I]
B06[Cl-B]
B06[Cl-Si]
B06[Cl-X]
B06[Br-Br]
B06[Br-I]
B06[Br-B]
B06[Br-Si]
B06[Br-X]
B06[I-I]
B06[I-B]
B06[I-Si]
B06[I-X]
B06[B-B]
B06[B-Si]
B06[B-X]
B06[Si-Si]
B06[Si-X]
B06[X-X]
B07[C-C]
B07[C-N]
B07[C-O]
B07[C-S]
B07[C-P]
B07[C-F]
B07[C-Cl]
B07[C-Br]
B07[C-I]
B07[C-B]
B07[C-Si]
B07[C-X]
B07[N-N]
B07[N-O]
B07[N-S]
B07[N-P]
B07[N-F]
B07[N-Cl]
B07[N-Br]
B07[N-I]
B07[N-B]
B07[N-Si]
B07[N-X]
B07[O-O]
B07[O-S]
B07[O-P]
B07[O-F]
B07[O-Cl]
B07[O-Br]
B07[O-I]
B07[O-B]
B07[O-Si]
B07[O-X]
B07[S-S]
B07[S-P]
B07[S-F]
B07[S-Cl]
B07[S-Br]
B07[S-I]
B07[S-B]
B07[S-Si]
B07[S-X]
B07[P-P]
B07[P-F]
B07[P-Cl]
B07[P-Br]
B07[P-I]
B07[P-B]
B07[P-Si]
B07[P-X]
B07[F-F]
B07[F-Cl]
B07[F-Br]
B07[F-I]
B07[F-B]
B07[F-Si]
B07[F-X]
B07[Cl-Cl]
B07[Cl-Br]
B07[Cl-I]
B07[Cl-B]
B07[Cl-Si]
B07[Cl-X]
B07[Br-Br]
B07[Br-I]
B07[Br-B]
B07[Br-Si]
B07[Br-X]
B07[I-I]
B07[I-B]
B07[I-Si]
B07[I-X]
B07[B-B]
B07[B-Si]
B07[B-X]
B07[Si-Si]
B07[Si-X]
B07[X-X]
B08[C-C]
B08[C-N]
B08[C-O]
B08[C-S]
B08[C-P]
B08[C-F]
B08[C-Cl]
B08[C-Br]
B08[C-I]
B08[C-B]
B08[C-Si]
B08[C-X]
B08[N-N]
B08[N-O]
B08[N-S]
B08[N-P]
B08[N-F]
B08[N-Cl]
B08[N-Br]
B08[N-I]
B08[N-B]
B08[N-Si]
B08[N-X]
B08[O-O]
B08[O-S]
B08[O-P]
B08[O-F]
B08[O-Cl]
B08[O-Br]
B08[O-I]
B08[O-B]
B08[O-Si]
B08[O-X]
B08[S-S]
B08[S-P]
B08[S-F]
B08[S-Cl]
B08[S-Br]
B08[S-I]
B08[S-B]
B08[S-Si]
B08[S-X]
B08[P-P]
B08[P-F]
B08[P-Cl]
B08[P-Br]
B08[P-I]
B08[P-B]
B08[P-Si]
B08[P-X]
B08[F-F]
B08[F-Cl]
B08[F-Br]
B08[F-I]
B08[F-B]
B08[F-Si]
B08[F-X]
B08[Cl-Cl]
B08[Cl-Br]
B08[Cl-I]
B08[Cl-B]
B08[Cl-Si]
B08[Cl-X]
B08[Br-Br]
B08[Br-I]
B08[Br-B]
B08[Br-Si]
B08[Br-X]
B08[I-I]
B08[I-B]
B08[I-Si]
B08[I-X]
B08[B-B]
B08[B-Si]
B08[B-X]
B08[Si-Si]
B08[Si-X]
B08[X-X]
B09[C-C]
B09[C-N]
B09[C-O]
B09[C-S]
B09[C-P]
B09[C-F]
B09[C-Cl]
B09[C-Br]
B09[C-I]
B09[C-B]
B09[C-Si]
B09[C-X]
B09[N-N]
B09[N-O]
B09[N-S]
B09[N-P]
B09[N-F]
B09[N-Cl]
B09[N-Br]
B09[N-I]
B09[N-B]
B09[N-Si]
B09[N-X]
B09[O-O]
B09[O-S]
B09[O-P]
B09[O-F]
B09[O-Cl]
B09[O-Br]
B09[O-I]
B09[O-B]
B09[O-Si]
B09[O-X]
B09[S-S]
B09[S-P]
B09[S-F]
B09[S-Cl]
B09[S-Br]
B09[S-I]
B09[S-B]
B09[S-Si]
B09[S-X]
B09[P-P]
B09[P-F]
B09[P-Cl]
B09[P-Br]
B09[P-I]
B09[P-B]
B09[P-Si]
B09[P-X]
B09[F-F]
B09[F-Cl]
B09[F-Br]
B09[F-I]
B09[F-B]
B09[F-Si]
B09[F-X]
B09[Cl-Cl]
B09[Cl-Br]
B09[Cl-I]
B09[Cl-B]
B09[Cl-Si]
B09[Cl-X]
B09[Br-Br]
B09[Br-I]
B09[Br-B]
B09[Br-Si]
B09[Br-X]
B09[I-I]
B09[I-B]
B09[I-Si]
B09[I-X]
B09[B-B]
B09[B-Si]
B09[B-X]
B09[Si-Si]
B09[Si-X]
B09[X-X]
B10[C-C]
B10[C-N]
B10[C-O]
B10[C-S]
B10[C-P]
B10[C-F]
B10[C-Cl]
B10[C-Br]
B10[C-I]
B10[C-B]
B10[C-Si]
B10[C-X]
B10[N-N]
B10[N-O]
B10[N-S]
B10[N-P]
B10[N-F]
B10[N-Cl]
B10[N-Br]
B10[N-I]
B10[N-B]
B10[N-Si]
B10[N-X]
B10[O-O]
B10[O-S]
B10[O-P]
B10[O-F]
B10[O-Cl]
B10[O-Br]
B10[O-I]
B10[O-B]
B10[O-Si]
B10[O-X]
B10[S-S]
B10[S-P]
B10[S-F]
B10[S-Cl]
B10[S-Br]
B10[S-I]
B10[S-B]
B10[S-Si]
B10[S-X]
B10[P-P]
B10[P-F]
B10[P-Cl]
B10[P-Br]
B10[P-I]
B10[P-B]
B10[P-Si]
B10[P-X]
B10[F-F]
B10[F-Cl]
B10[F-Br]
B10[F-I]
B10[F-B]
B10[F-Si]
B10[F-X]
B10[Cl-Cl]
B10[Cl-Br]
B10[Cl-I]
B10[Cl-B]
B10[Cl-Si]
B10[Cl-X]
B10[Br-Br]
B10[Br-I]
B10[Br-B]
B10[Br-Si]
B10[Br-X]
B10[I-I]
B10[I-B]
B10[I-Si]
B10[I-X]
B10[B-B]
B10[B-Si]
B10[B-X]
B10[Si-Si]
B10[Si-X]
B10[X-X]
F01[C-C]
F01[C-N]
F01[C-O]
F01[C-S]
F01[C-P]
F01[C-F]
F01[C-Cl]
F01[C-Br]
F01[C-I]
F01[C-B]
F01[C-Si]
F01[C-X]
F01[N-N]
F01[N-O]
[truncated: 854 more rows]

## Sheet: 2. P. gingivalis
Supplementary Data 4. The optimal combination of descriptors of each algorithm
Bioactivity dataset 1. Biological toxicology
Descriptprs-Original (n=4143)	Descriptprs-Wilcoxon (n=1503)	Descriptprs-Spearman (n=87)	Descriptprs-XGBoost （n=59)	Descriptprs-DT (n=78)	Descriptprs-RFE (LR, n=34)	Descriptprs-RF (n=5)
MW	GATS4s	GATS4s	GATS4s	CATS2D_04_AA	GATS4s	GATS4s
AMW	ChiA_B(s)	ChiA_B(s)	ChiA_B(s)	P_VSA_charge_12	phLevel2	ChiA_B(s)
Sv	GATS2v	GATS2v	GATS2v	nCs	minaasC	GATS2v
Se	phLevel2	phLevel2	phLevel2	MATS1s	MATS5s	phLevel2
Sp	ChiA_B(e)	SM1_Dz(Z)	SM1_Dz(Z)	minaasC	Eta_epsi_5	SM1_Dz(Z)
Si	AMW	GATS2m	GATS2m	MATS3i	SpMin2_Bh(s)	GATS2m
Mv	s3_relPathLength_2	MATS3e	MATS3e	MATS5s	P_VSA_charge_5	MATS3e
Me	s3_phRelSize_2	CATS2D_04_AA	P_VSA_charge_12	Eta_epsi_5	MATS4p	CATS2D_04_AA
Mp	s3_phRelSize	P_VSA_charge_12	MATS1s	SIC3	VE1_B(e)	P_VSA_charge_12
Mi	s4_relPathLength_2	nCs	minaasC	IC1	nArX	MATS1s
GD	SpPosA_B(m)	MATS1s	MATS5s	SpMin2_Bh(s)	nCconj	minaasC
nAT	ChiA_B(m)	minaasC	Eta_epsi_5	P_VSA_charge_5	VE1sign_B(p)	MATS3i
nSK	ChiA_B(i)	MATS3i	SIC3	MATS4p	VE1sign_H2	MATS5s
nAA	s3_relPathLength	MATS5s	IC1	SpDiam_B(s)	B06[N-O]	Eta_epsi_5
nTA	SpPosA_B(e)	Eta_epsi_5	SpMin2_Bh(s)	F04[O-O]	GATS6i	SIC3
nBT	C-026	SIC3	P_VSA_charge_5	VE1_B(e)	P_VSA_s_5	IC1
nBO	s2_relSize	IC1	MATS4p	nArX	SM02_EA(dm)	SpMin2_Bh(s)
nBM	s3_numSharedNeighbors	SpMin2_Bh(s)	SpDiam_B(s)	H-052	MATS4i	MATS4p
SCBO	phLevel1	P_VSA_charge_5	F04[O-O]	NssCH2	J_D/Dt	SpDiam_B(s)
RBN	GATS4e	MATS4p	VE1_B(e)	P_VSA_MR_5	JGI9	F04[O-O]
RBF	Eta_D_epsiA	SpDiam_B(s)	nArX	MATS4s	P_VSA_charge_4	VE1_B(e)
nDB	s3_phSize	F04[O-O]	NssCH2	nCconj	MATS8i	nArX
nTB	Eta_epsi_A	VE1_B(e)	P_VSA_MR_5	GATS6m	GATS6e	P_VSA_MR_5
nAB	s2_size	nArX	MATS4s	VE1sign_B(p)	nHM	MATS4s
nH	s2_relPathLength	H-052	nCconj	VE1sign_H2	SpMin1_Bh(m)	nCconj
nC	s3_pathLength	NssCH2	GATS6m	B06[N-O]	F10[N-O]	GATS6m
nN	nRCONHR	P_VSA_MR_5	VE1sign_B(p)	CATS2D_07_AA	MaxaasC	VE1sign_B(p)
nO	SpDiam_B(v)	MATS4s	VE1sign_H2	GATS6i	GATS8v	VE1sign_H2
nP	s3_relSize	nCconj	GATS6i	B05[N-N]	P_VSA_charge_6	GATS6i
nS	SpDiam_B(p)	GATS6m	GATS6p	P_VSA_s_5	SpMin2_Bh(m)	GATS6p
nF	SM1_Dz(Z)	VE1sign_B(p)	SM02_EA(dm)	CATS2D_04_DA	CATS2D_04_LL	SM02_EA(dm)
nCL	GATS2i	VE1sign_H2	GATS5e	GATS6p	CATS2D_04_DD	GATS5e
nBR	s2_pathLength	B06[N-O]	MATS4i	SM02_EA(dm)	GATS3i	MATS4i
nI	SM1_Dz(m)	CATS2D_07_AA	MATS8e	GATS5e	P_VSA_charge_13	MATS8e
nB	s2_relPathLength_2	GATS6i	JGI9	MATS4i		J_D/Dt
nHM	Eta_D_epsiB	B05[N-N]	F02[C-O]	MATS8e		JGI9
nHet	ATSC1e	P_VSA_s_5	GATS7s	F02[C-O]		F02[C-O]
nX	H%	CATS2D_04_DA	P_VSA_charge_4	GATS7s		GATS7s
H%	Me	GATS6p	Eta_betaS_A	P_VSA_charge_4		Eta_betaS_A
C%	C-008	SM02_EA(dm)	MATS8i	Eta_betaS_A		MATS8i
N%	ChiA_B(v)	GATS5e	GATS6e	MATS8i		GATS6e
O%	P_VSA_charge_7	MATS4i	P_VSA_LogP_4	GATS6e		P_VSA_LogP_4
X%	s4_relPathLength	MATS8e	nHM	P_VSA_LogP_4		nHM
nCsp3	s34_phRelSize	J_D/Dt	SpMin1_Bh(m)	nHM		SpMin1_Bh(m)
nCsp2	P_VSA_s_6	JGI9	MATS6p	CATS2D_03_AA		MATS7p
nCsp	SpMAD_EA(dm)	F02[C-O]	MATS8m	SpMin1_Bh(m)		MATS6p
Fsp3	maxDistfromCC	GATS7s	Chi_D/Dt	MATS7p		F10[N-O]
max_conj_path	meanDistFromCC	P_VSA_charge_4	SPP	MATS6p		MATS8m
nStructures	nLevel3	Eta_betaS_A	PJI2	nTA		Chi_D/Dt
totalcharge	SpDiam_B(e)	MATS8i	MaxaasC	F10[N-O]		SPP
nCIC	SpDiam_B(i)	GATS6e	GATS8v	MATS8m		MaxaasC
nCIR	SpDiam_B(m)	P_VSA_LogP_4	P_VSA_charge_6	Chi_D/Dt		GATS8v
TRS	s3_numRotBonds	nHM	SpMin2_Bh(m)	SPP		P_VSA_charge_6
Rperim	GATS2m	CATS2D_03_AA	CATS2D_08_AA	PJI2		SpMin2_Bh(m)
Rbrid	Mv	SpMin1_Bh(m)	mindO	MaxaasC		minssCH2
MCD	SpMax5_Bh(s)	MATS7p	GATS3i	GATS8v		CATS2D_08_AA
RFD	s3_size	MATS6p	JGI5	P_VSA_charge_6		mindO
RCI	SpMax_B(i)	nTA	GATS6v	SpMin2_Bh(m)		CATS2D_04_LL
NRS	SpMax7_Bh(s)	F10[N-O]	SpMAD_X	minssCH2		GATS3m
NNRS	GATS1v	MATS8m		CATS2D_08_AA		GATS3i
nSpiro	ChiA_B(p)	Chi_D/Dt		mindO		P_VSA_charge_13
nBridgeHead	s4_pathLength	SPP		B10[N-N]		JGI5
nR03	F03[N-O]	PJI2		CATS2D_04_LL		GATS6v
nR04	phLevel3	MaxaasC		GATS3m		JGI10
nR05	SpPosA_B(i)	GATS8v		CATS2D_04_DD		GATS3s
nR06	s4_phRelSize_2	P_VSA_charge_6		C-006		SpMAD_X
nR07	SpMax_B(e)	SpMin2_Bh(m)		GATS3i
nR08	Eig02_EA(dm)	minssCH2		P_VSA_charge_13
nR09	SpMax_B(m)	CATS2D_08_AA		JGI5
nR10	SM12_AEA(ri)	mindO		CATS2D_05_DA
nR11	Eig02_EA(bo)	B10[N-N]		GATS6v
nR12	N-072	CATS2D_04_LL		JGI10
nBnz	CATS2D_02_AL	GATS3m		nCp
ARR	DLS_04	CATS2D_04_DD		Eta_D_epsiD
AP	MATS3e	C-006		GATS3s
D/Dtr03	Eta_L_A	GATS3i		CATS2D_05_DL
D/Dtr04	SM09_EA(bo)	P_VSA_charge_13		SpMAD_X
D/Dtr05	AVS_B(m)	JGI5		C-005
D/Dtr06	s34_phSize	CATS2D_05_DA
D/Dtr07	SpMAD_EA(bo)	GATS6v
D/Dtr08	C-040	JGI10
D/Dtr09	SpMax_B(v)	nCp
D/Dtr10	chiralPhMoment	Eta_D_epsiD
D/Dtr11	s34_size	GATS3s
D/Dtr12	SM11_EA(bo)	CATS2D_05_DL
ZM1	Fsp3	SpMAD_X
ZM1V	SM10_EA(bo)	C-005
ZM1Kup	SM05_EA(bo)
ZM1Mad	SM07_EA(bo)
ZM1Per	SpMax8_Bh(s)
ZM1MulPer	SM03_EA(bo)
ZM2	SpMax6_Bh(s)
ZM2V	P_VSA_MR_7
ZM2Kup	SM12_EA(bo)
ZM2Mad	GATS2p
ZM2Per	P_VSA_charge_2
ZM2MulPer	P_VSA_LogP_2
ON0	s4_numRotBonds
ON0V	GATS1m
ON1	Eta_B
ON1V	GGI3
Qindex	SM08_EA(bo)
BBI	nLevel1
DBI	nLevel4
SNar	P_VSA_ppp_A
HNar	SM06_EA(bo)
GNar	DELS
Xt	minsssCH
Dz	s4_phRelSize
Ram	nLevel2
BLI	ATSC1s
Pol	chiralMoment
LPRS	s4_size
MSD	SpMax_AEA(bo)
SPI	Eig01_AEA(bo)
PJI2	TPSA(Tot)
ECC	SM13_EA(bo)
AECC	CATS2D_04_AA
DECC	DLS_cons
MDDD	P_VSA_charge_12
UNIP	s4_phSize
CENT	NsssCH
VAR	SpDiam_EA(ri)
ICR	SM1_Dz(e)
MaxTD	nCb-
MeanTD	s34_relSize
MaxDD	SpMax_B(p)
MeanDD	nCs
SMTI	SpMax4_Bh(s)
SMTIV	SpMax2_Bh(m)
GMTI	CATS2D_00_AA
GMTIV	SpMaxA_EA(dm)
Xu	SM08_AEA(bo)
CSI	SM15_EA(bo)
Wap	GGI6
S1K	SM14_EA(bo)
S2K	Eig02_AEA(bo)
S3K	SpMax_EA(bo)
PHI	SM11_AEA(ri)
PW2	Eig01_EA(bo)
PW3	s4_relSize
PW4	SM11_AEA(dm)
PW5	SM6_B(m)
MAXDN	Eig02_EA(ed)
MAXDP	MATS1s
DELS	Eig02_AEA(ed)
TIE	SM15_EA(ed)
Psi_i_s	CATS2D_03_DD
Psi_i_A	SM13_EA(ed)
Psi_i_0	SM14_EA(ed)
Psi_i_1	ChiralCenter
Psi_i_t	SAacc
Psi_i_1s	SpDiam_EA(bo)
Psi_e_A	nCrs
Psi_e_0	SM12_EA(ed)
Psi_e_1	GGI2
Psi_e_t	NaasC
BAC	ATSC8e
LOC	SpMax1_Bh(m)
MWC01	Eig05_AEA(dm)
MWC02	SPI
MWC03	AVS_B(e)
MWC04	SM11_EA(ed)
MWC05	s4_numSharedNeighbors
MWC06	AVS_B(s)
MWC07	CATS2D_06_AA
MWC08	minaasC
MWC09	P_VSA_v_2
MWC10	ATSC4e
SRW02	Eta_beta_A
SRW03	ringChiralCenter
SRW04	DLS_05
SRW05	B03[N-O]
SRW06	ATSC7e
SRW07	Mp
SRW08	ATSC6e
SRW09	Eta_FL_A
SRW10	SM10_EA(ed)
MPC01	SM2_B(s)
MPC02	SM07_AEA(bo)
MPC03	Eig07_AEA(dm)
MPC04	nLevel5
MPC05	SHED_AA
MPC06	SM04_EA(bo)
MPC07	HyWi_B(s)
MPC08	SM10_AEA(dm)
MPC09	SpMax_EA(ed)
MPC10	ATSC5e
piPC01	Eig01_EA(ed)
piPC02	SM3_B(s)
piPC03	s2_numRotBonds
piPC04	SM03_EA
piPC05	Eig04_EA(bo)
piPC06	SM14_AEA(ri)
piPC07	MATS3i
piPC08	Eig02_EA
piPC09	SM10_AEA(bo)
piPC10	SM09_EA(ed)
TWC	Eta_F_A
TPC	MATS5s
piID	GGI1
PCR	X5A
PCD	AVS_B(i)
CID	SM1_Dz(p)
BID	SpDiam_EA(ed)
X0	SpMax3_Bh(s)
X1	ATSC3e
X2	TPSA(NO)
X3	SM07_EA(ed)
X4	GATS1i
X5	SM08_EA(ed)
X0A	SM06_AEA(bo)
X1A	nLevel6
X2A	SM15_AEA(ed)
X3A	Eig01_AEA(ed)
X4A	SpMax_AEA(ed)
X5A	Eta_epsi_5
X0v	SM14_AEA(ed)
X1v	GATS1p
X2v	nHet
X3v	Eta_betaP_A
X4v	SM13_AEA(ed)
X5v	ZM1MulPer
X0Av	Eig02_AEA(ri)
X1Av	SpMax_EA(ri)
X2Av	SpMax_A
X3Av	Eig01_EA(ri)
X4Av	SM5_B(m)
X5Av	SM05_EA
X0sol	SM05_AEA(bo)
X1sol	SM1_Dz(v)
X2sol	SM06_EA(ed)
X3sol	SpDiam_L
X4sol	Ram
X5sol	max_conj_path
XMOD	SM08_EA
RDCHI	SsssCH
RDSQ	SM12_AEA(ed)
X1Kup	ZM1V
X1Mad	SIC3
X1Per	SM05_EA(ed)
X1MulPer	QED
ISIZ	SM03_EA(ed)
IAC	SM15_AEA(ri)
AAC	Eig05_EA(bo)
IDE	piPC06
IDM	ZM1Kup
IDDE	SpMAD_EA(ed)
IDDM	SM12_EA
IDET	SpMAD_AEA(ri)
IDMT	IC1
IVDE	SpDiam_AEA(ri)
IVDM	SM07_EA
Ges	piPC10
rGes	SM14_EA
S0K	SM15_EA
HVcpx	Eta_D_beta_A
HDcpx	SM04_EA(ed)
Uindex	SM13_EA
Vindex	piPC07
Xindex	ZM1Per
Yindex	Eig09_AEA(dm)
BertzCT	SM1_B(s)
IC0	P_VSA_LogP_5
IC1	SpAbs_B(s)
IC2	SpPos_B(s)
IC3	Psi_i_s
IC4	SM11_AEA(ed)
IC5	SpMax_AEA(ri)
TIC0	SM07_AEA(ed)
TIC1	SM06_AEA(ed)
TIC2	Eig01_AEA(ri)
TIC3	SM10_AEA(ed)
TIC4	SM11_EA
TIC5	CATS2D_04_AL
SIC0	ESOL
SIC1	QEDu
SIC2	SM09_AEA(ed)
SIC3	SM4_B(m)
SIC4	SM08_AEA(ed)
SIC5	SM10_EA
CIC0	PCR
CIC1	SM09_EA
CIC2	SpMin2_Bh(s)
CIC3	nHAcc
CIC4	SM04_AEA(bo)
CIC5	piPC04
BIC0	PCD
BIC1	piPC05
BIC2	TIE
BIC3	AAC
BIC4	Eig06_EA(bo)
BIC5	IC0
J_A	ChiA_H2
SpPos_A	P_VSA_charge_5
SpPosA_A	LOGP99
SpPosLog_A	SM06_EA
SpMax_A	SpMax_EA
SpMaxA_A	SpDiam_EA
SpDiam_A	SM09_AEA(bo)
SpAD_A	Eig01_EA
SpMAD_A	piPC09
Ho_A	GGI9
EE_A	SpMax1_Bh(e)
VE1_A	P_VSA_charge_3
VE2_A	Eig08_AEA(dm)
VE3_A	piPC08
VE1sign_A	Eig06_AEA(dm)
VE2sign_A	ZM2Per
VR1_A	ZM2MulPer
VR2_A	Eig09_AEA(ed)
VR3_A	SIC4
Wi_D	ATSC2e
WiA_D	SpDiam_A
AVS_D	SpMin1_Bh(s)
H_D	SpMAD_EA
Chi_D	X1A
ChiA_D	MATS4p
J_D	nCsp3
HyWi_D	Psi_i_t
SpPos_D	ZM2Kup
SpPosA_D	ZM2V
SpPosLog_D	SM05_AEA(ed)
SpMax_D	ATS4s
SpMaxA_D	SpMax1_Bh(v)
SpDiam_D	AVS_B(v)
SpAD_D	P_VSA_p_2
SpMAD_D	EE_B(m)
Ho_D	SpDiam_B(s)
SM2_D	piPC03
SM3_D	Eig02_EA(ri)
SM4_D	SM03_EA(ri)
SM5_D	Eta_epsi_4
SM6_D	P_VSA_ppp_con
VE1_D	SM6_B(e)
VE2_D	SpMax1_Bh(p)
VE3_D	SM04_AEA(ed)
VE1sign_D	SM6_B(p)
VE2sign_D	piID
VR1_D	CATS2D_08_AL
VR2_D	SIC5
VR3_D	SM13_AEA(ri)
Acon	s2_numSharedNeighbors
QW_L	SpAD_B(s)
TI1_L	Eig03_EA(bo)
TI2_L	ATSC7s
STN_L	ATSC8s
SpPos_L	F04[O-O]
SpPosA_L	nCsp2
SpPosLog_L	CATS2D_07_AL
SpMax_L	VE1_B(e)
SpMaxA_L	SM02_EA(ed)
SpDiam_L	nArX
SpAD_L	SpDiam_H2
SpMAD_L	SM3_B(m)
Ho_L	SRW10
EE_L	IC2
SM2_L	X4A
SM3_L	SM15_EA(ri)
SM4_L	VE1_A
SM5_L	H-052
SM6_L	Q2
VE1_L	SM6_L
VE2_L	SpMax_H2
VE3_L	SM03_AEA(ri)
VE1sign_L	Eig08_EA(ed)
VE2sign_L	CATS2D_03_DA
VE3sign_L	GGI5
VR1_L	Eig06_AEA(bo)
VR2_L	SM10_EA(ri)
VR3_L	ZM1Mad
AVS_X	NssCH2
H_X	X5Av
Chi_X	Eta_betaP
ChiA_X	SM05_EA(ri)
J_X	AVS_B(p)
HyWi_X	P_VSA_MR_5
SpPos_X	ZM2Mad
SpPosA_X	Eta_D_beta
SpPosLog_X	SM6_B(v)
SpMax_X	SpPosA_B(v)
SpMaxA_X	SM03_AEA(ed)
SpDiam_X	C%
SpAD_X	Eig07_AEA(ed)
SpMAD_X	Eig09_AEA(bo)
Ho_X	s3_numAroBonds
EE_X	MATS4s
SM2_X	Wi_B(s)
SM3_X	ATS3m
SM4_X	VE2_D/Dt
SM5_X	SM12_EA(ri)
SM6_X	nCconj
VE1_X	nLevel8
VE2_X	Eig08_AEA(ed)
VE3_X	nLevel7
VE1sign_X	s4_numAroBonds
VE2sign_X	SM09_EA(ri)
VR1_X	SM14_EA(ri)
VR2_X	LOGPcons
VR3_X	SM04_EA
Wi_H2	SM07_EA(ri)
WiA_H2	C-033
AVS_H2	MWC10
Chi_H2	TWC
ChiA_H2	Ges
J_H2	Eig10_AEA(ed)
HyWi_H2	SM4_B(s)
SpPos_H2	SM13_EA(ri)
SpPosA_H2	Eig08_AEA(bo)
SpPosLog_H2	s2_phRelSize
SpMax_H2	GATS4p
SpMaxA_H2	SM6_B(i)
SpDiam_H2	ATS4m
SpAD_H2	MWC08
SpMAD_H2	SM11_EA(ri)
Ho_H2	GGI10
EE_H2	SM03_AEA(dm)
SM2_H2	Eig09_EA
SM3_H2	SM5_B(s)
SM4_H2	MWC09
SM5_H2	SM6_H2
SM6_H2	IC3
VE1_H2	Eig09_AEA(ri)
VE2_H2	MWC07
VE3_H2	s2_phSize
VE1sign_H2	SM5_B(p)
VE2sign_H2	SRW08
VR1_H2	Eig04_AEA(dm)
VR2_H2	SM1_Dz(i)
VR3_H2	SM03_AEA(bo)
Wi_Dt	P_VSA_LogP_6
WiA_Dt	P_VSA_s_3
AVS_Dt	B03[N-N]
H_Dt	nBM
Chi_Dt	Eig07_EA(bo)
ChiA_Dt	Uc
J_Dt	SM5_B(e)
HyWi_Dt	GGI4
SpPos_Dt	MWC06
SpPosA_Dt	SM06_EA(ri)
SpPosLog_Dt	SM6_B(s)
SpMax_Dt	SM08_EA(ri)
SpMaxA_Dt	Eig08_EA
SpDiam_Dt	SM02_AEA(dm)
SpAD_Dt	Eta_F
SpMAD_Dt	Eig10_AEA(dm)
Ho_Dt	SM5_L
SM2_Dt	Chi0_EA(dm)
SM3_Dt	Eig08_EA(bo)
SM4_Dt	CATS2D_03_AL
SM5_Dt	BertzCT
SM6_Dt	MPC06
VE1_Dt	ARR
VE2_Dt	Qneg
VE3_Dt	Qtot
VE1sign_Dt	Qpos
VE2sign_Dt	MWC05
VR1_Dt	SM2_B(m)
VR2_Dt	SM02_EA(bo)
VR3_Dt	IDDE
Wi_D/Dt	Ho_B(s)
WiA_D/Dt	VE2_B(s)
AVS_D/Dt	X3A
H_D/Dt	piPC02
Chi_D/Dt	MPC04
ChiA_D/Dt	AVS_H2
J_D/Dt	X4sol
HyWi_D/Dt	SM5_H2
SpPos_D/Dt	Ui
SpPosA_D/Dt	ATS7s
SpPosLog_D/Dt	HyWi_B(m)
SpMax_D/Dt	SpMax_L
SpMaxA_D/Dt	P_VSA_ppp_hal
SpDiam_D/Dt	Eta_epsi_2
SpAD_D/Dt	SM5_B(v)
SpMAD_D/Dt	AP
Ho_D/Dt	H-048
EE_D/Dt	ALOGP
SM2_D/Dt	CIC5
SM3_D/Dt	Eig09_EA(ri)
SM4_D/Dt	Eig12_AEA(ed)
SM5_D/Dt	SpMax1_Bh(i)
SM6_D/Dt	ATS3s
VE1_D/Dt	SM02_AEA(ed)
VE2_D/Dt	ATS2m
VE3_D/Dt	SM5_B(i)
VE1sign_D/Dt	H_Dz(m)
VE2sign_D/Dt	H_Dz(Z)
VR1_D/Dt	VE1_H2
VR2_D/Dt	SssCH2
VR3_D/Dt	ALOGP2
Wi_Dz(Z)	MAXDN
WiA_Dz(Z)	MATS4e
AVS_Dz(Z)	Eig05_AEA(bo)
H_Dz(Z)	EE_L
Chi_Dz(Z)	SRW06
ChiA_Dz(Z)	Eig08_AEA(ri)
J_Dz(Z)	Eig14_AEA(ed)
HyWi_Dz(Z)	SM02_AEA(ri)
SpAbs_Dz(Z)	GATS6m
SpPos_Dz(Z)	Eig07_EA(ed)
SpPosA_Dz(Z)	VE1sign_B(p)
SpPosLog_Dz(Z)	Eig07_EA
SpMax_Dz(Z)	SM15_AEA(bo)
SpMaxA_Dz(Z)	GGI8
SpDiam_Dz(Z)	Eig06_AEA(ed)
SpAD_Dz(Z)	Eig13_AEA(ed)
SpMAD_Dz(Z)	SM4_B(e)
Ho_Dz(Z)	VE1sign_H2
SM1_Dz(Z)	B06[N-O]
SM2_Dz(Z)	Eig04_AEA(bo)
SM3_Dz(Z)	Eta_D_epsiC
SM4_Dz(Z)	PW2
SM5_Dz(Z)	Eig03_AEA(bo)
SM6_Dz(Z)	Eig07_AEA(bo)
VE1_Dz(Z)	CATS2D_07_AA
VE2_Dz(Z)	Eig09_EA(bo)
VE3_Dz(Z)	PW3
VE1sign_Dz(Z)	SpAD_EA(ed)
VE2sign_Dz(Z)	X%
VR1_Dz(Z)	ATS8s
VR2_Dz(Z)	MWC04
VR3_Dz(Z)	VE1sign_A
Wi_Dz(m)	CATS2D_02_AA
WiA_Dz(m)	Eig09_EA(ed)
AVS_Dz(m)	SM04_AEA(ri)
H_Dz(m)	ATS2s
Chi_Dz(m)	H_Dz(e)
ChiA_Dz(m)	SM4_B(p)
J_Dz(m)	CIC4
HyWi_Dz(m)	MaxaasN
SpAbs_Dz(m)	minaasN
SpPos_Dz(m)	Eig06_EA
SpPosA_Dz(m)	CIC3
SpPosLog_Dz(m)	SM14_AEA(bo)
SpMax_Dz(m)	ATS8m
SpMaxA_Dz(m)	MPC03
SpDiam_Dz(m)	SIC2
SpAD_Dz(m)	ATS7m
SpMAD_Dz(m)	SM4_L
Ho_Dz(m)	SM1_B(m)
SM1_Dz(m)	X2Av
SM2_Dz(m)	SM4_B(i)
SM3_Dz(m)	MPC05
SM4_Dz(m)	SpMAD_B(m)
SM5_Dz(m)	SM4_H2
SM6_Dz(m)	Chi1_EA(dm)
VE1_Dz(m)	GATS6i
VE2_Dz(m)	SpMax5_Bh(m)
VE3_Dz(m)	Eig08_EA(ri)
VE1sign_Dz(m)	EE_B(e)
VE2sign_Dz(m)	SaasN
VR1_Dz(m)	Eta_FL
VR2_Dz(m)	H_Dz(i)
VR3_Dz(m)	Qindex
Wi_Dz(v)	SM04_EA(ri)
WiA_Dz(v)	MPC07
AVS_Dz(v)	Eta_beta
H_Dz(v)	Eig05_EA
Chi_Dz(v)	SM13_AEA(bo)
ChiA_Dz(v)	B05[N-N]
J_Dz(v)	ATS6s
HyWi_Dz(v)	ATS1m
SpAbs_Dz(v)	SM4_B(v)
SpPos_Dz(v)	F06[N-O]
SpPosA_Dz(v)	nX
SpPosLog_Dz(v)	Eig11_AEA(ed)
SpMax_Dz(v)	Chi_Dt
SpMaxA_Dz(v)	P_VSA_s_5
SpDiam_Dz(v)	GATS4i
SpAD_Dz(v)	SpMAD_AEA(bo)
SpMAD_Dz(v)	CATS2D_04_DA
Ho_Dz(v)	EE_B(i)
SM1_Dz(v)	Eig05_AEA(ed)
SM2_Dz(v)	Eig06_AEA(ri)
SM3_Dz(v)	X2sol
SM4_Dz(v)	Pol
SM5_Dz(v)	SpDiam_AEA(bo)
SM6_Dz(v)	Psi_e_1
VE1_Dz(v)	SpMax2_Bh(e)
VE2_Dz(v)	SM02_AEA(bo)
VE3_Dz(v)	GMTIV
VE1sign_Dz(v)	SM3_B(e)
VE2sign_Dz(v)	NaasN
VR1_Dz(v)	SM3_H2
VR2_Dz(v)	GATS6p
VR3_Dz(v)	nAA
Wi_Dz(e)	nAB
WiA_Dz(e)	EE_H2
AVS_Dz(e)	H_Dz(v)
H_Dz(e)	Eig05_AEA(ri)
Chi_Dz(e)	Eig03_AEA(ed)
ChiA_Dz(e)	Eig07_AEA(ri)
J_Dz(e)	SM02_EA(dm)
HyWi_Dz(e)	GATS5e
SpAbs_Dz(e)	SpPos_B(m)
SpPos_Dz(e)	MPC09
SpPosA_Dz(e)	S0K
SpPosLog_Dz(e)	Psi_i_1s
SpMax_Dz(e)	ATS1s
SpMaxA_Dz(e)	ON0
SpDiam_Dz(e)	X3sol
SpAD_Dz(e)	MPC10
SpMAD_Dz(e)	Eig07_EA(ri)
Ho_Dz(e)	Eig06_EA(ed)
SM1_Dz(e)	s2_phRelSize_2
SM2_Dz(e)	SM15_AEA(dm)
SM3_Dz(e)	ZM2
SM4_Dz(e)	NssNH
SM5_Dz(e)	Ho_B(m)
SM6_Dz(e)	MWC03
VE1_Dz(e)	SpAbs_B(m)
VE2_Dz(e)	Eig10_EA(ed)
VE3_Dz(e)	SM3_L
VE1sign_Dz(e)	SM05_AEA(ri)
VE2sign_Dz(e)	VE3_B(e)
VR1_Dz(e)	MATS4i
VR2_Dz(e)	EE_B(v)
VR3_Dz(e)	H_D/Dt
Wi_Dz(p)	SM02_EA
WiA_Dz(p)	BBI
AVS_Dz(p)	MPC02
H_Dz(p)	MATS8e
Chi_Dz(p)	SM2_B(e)
ChiA_Dz(p)	X4
J_Dz(p)	X4Av
HyWi_Dz(p)	VR2_D/Dt
SpAbs_Dz(p)	nCIR
SpPos_Dz(p)	BIC3
SpPosA_Dz(p)	MaxssCH2
SpPosLog_Dz(p)	GGI7
SpMax_Dz(p)	Eig11_AEA(dm)
SpMaxA_Dz(p)	EE_B(p)
SpDiam_Dz(p)	VE2_X
SpAD_Dz(p)	SpAD_EA(bo)
SpMAD_Dz(p)	HyWi_B(e)
Ho_Dz(p)	MPC08
SM1_Dz(p)	VE2sign_B(p)
SM2_Dz(p)	SpPosA_B(p)
SM3_Dz(p)	Eig10_AEA(bo)
SM4_Dz(p)	VR2_B(v)
SM5_Dz(p)	Wi_B(m)
SM6_Dz(p)	LLS_02
VE1_Dz(p)	D/Dtr05
VE2_Dz(p)	SM3_B(i)
VE3_Dz(p)	P_VSA_charge_11
VE1sign_Dz(p)	VR2_X
VE2sign_Dz(p)	SM04_AEA(dm)
VR1_Dz(p)	Eig10_EA
VR2_Dz(p)	BLTA96
VR3_Dz(p)	BLTD48
Wi_Dz(i)	BLTF96
WiA_Dz(i)	MLOGP
AVS_Dz(i)	XMOD
H_Dz(i)	SRW04
Chi_Dz(i)	VR2_Dz(p)
ChiA_Dz(i)	Eig10_EA(bo)
J_Dz(i)	SpPosA_Dt
HyWi_Dz(i)	SpAD_AEA(ed)
SpAbs_Dz(i)	SpMAD_Dt
SpPos_Dz(i)	SRW07
SpPosA_Dz(i)	X2A
SpPosLog_Dz(i)	arLevel3
SpMax_Dz(i)	CATS2D_09_AL
SpMaxA_Dz(i)	IC4
SpDiam_Dz(i)	VE3_H2
SpAD_Dz(i)	VR2_B(s)
SpMAD_Dz(i)	VR2_B(p)
Ho_Dz(i)	SpMaxA_Dt
SM1_Dz(i)	nLevel9
SM2_Dz(i)	SM2_B(i)
SM3_Dz(i)	F05[N-N]
SM4_Dz(i)	VE2_B(p)
SM5_Dz(i)	MW
SM6_Dz(i)	VR2_A
VE1_Dz(i)	ATS6m
VE2_Dz(i)	Eig06_EA(ri)
VE3_Dz(i)	X3
VE1sign_Dz(i)	Ho_B(e)
VE2sign_Dz(i)	Mi
VR1_Dz(i)	MeanDD
VR2_Dz(i)	nCar
VR3_Dz(i)	WiA_Dt
Wi_B(m)	VR2_D
WiA_B(m)	ATSC3s
AVS_B(m)	J_D/Dt
Chi_B(m)	ATSC4s
ChiA_B(m)	VR2_Dz(e)
J_B(m)	VR2_Dz(m)
HyWi_B(m)	VR2_Dz(Z)
SpAbs_B(m)	VR2_H2
SpPos_B(m)	SRW09
SpPosA_B(m)	VE1_Dz(Z)
SpPosLog_B(m)	VE1_Dz(m)
SpMax_B(m)	SpAbs_B(e)
SpMaxA_B(m)	GATS5s
SpDiam_B(m)	N-073
SpAD_B(m)	SM2_B(p)
SpMAD_B(m)	VR2_Dz(v)
Ho_B(m)	VR2_Dz(i)
EE_B(m)	Eig15_AEA(ed)
SM1_B(m)	Eta_R
SM2_B(m)	HyWi_B(i)
SM3_B(m)	Eig12_AEA(bo)
SM4_B(m)	SpMAD_B(p)
SM5_B(m)	VE1_Dz(i)
SM6_B(m)	VR2_L
VE1_B(m)	Eig05_EA(ed)
VE2_B(m)	SM14_AEA(dm)
VE3_B(m)	SM2_B(v)
VE1sign_B(m)	Eig11_AEA(bo)
VE2sign_B(m)	Eig13_AEA(dm)
VR1_B(m)	ZM1
VR2_B(m)	SM3_B(v)
VR3_B(m)	MWC02
Wi_B(v)	B05[O-O]
WiA_B(v)	B04[O-O]
AVS_B(v)	EE_B(s)
Chi_B(v)	SM11_AEA(bo)
ChiA_B(v)	SMTIV
J_B(v)	Eig03_EA
HyWi_B(v)	SM07_AEA(ri)
SpAbs_B(v)	Eig12_EA(ed)
SpPos_B(v)	X2
SpPosA_B(v)	H_Dz(p)
SpPosLog_B(v)	VE1_D
SpMax_B(v)	SM12_AEA(dm)
SpMaxA_B(v)	Eig03_EA(ed)
SpDiam_B(v)	Ho_B(i)
SpAD_B(v)	VE3_A
SpMAD_B(v)	Eig13_AEA(bo)
Ho_B(v)	P_VSA_v_3
EE_B(v)	P_VSA_p_3
SM1_B(v)	VR2_B(e)
SM2_B(v)	VR2_B(m)
SM3_B(v)	RDSQ
SM4_B(v)	HyWi_B(v)
SM5_B(v)	VE1_Dz(e)
SM6_B(v)	JGI9
VE1_B(v)	ATS5m
VE2_B(v)	SpAbs_B(i)
VE3_B(v)	Eig13_EA(ri)
VE1sign_B(v)	Eig10_AEA(ri)
VE2sign_B(v)	SpMax2_Bh(v)
VR1_B(v)	SpAD_EA(dm)
VR2_B(v)	Wi_B(e)
VR3_B(v)	F02[C-O]
Wi_B(e)	VR2_B(i)
WiA_B(e)	Chi1_EA(ri)
AVS_B(e)	PW4
Chi_B(e)	CATS2D_05_AL
ChiA_B(e)	CATS2D_06_AL
J_B(e)	HyWi_B(p)
HyWi_B(e)	DLS_02
SpAbs_B(e)	Eig05_EA(ri)
SpPos_B(e)	VR2_Dt
SpPosA_B(e)	ATS5s
SpPosLog_B(e)	Eta_betaS
SpMax_B(e)	RPCG
SpMaxA_B(e)	TIC1
SpDiam_B(e)	Wi_H2
SpAD_B(e)	H_X
SpMAD_B(e)	SCBO
Ho_B(e)	SpAbs_B(v)
EE_B(e)	piPC01
SM1_B(e)	CATS2D_01_AA
SM2_B(e)	Dz
SM3_B(e)	SM3_B(p)
SM4_B(e)	Ho_B(p)
SM5_B(e)	Eig11_EA(bo)
SM6_B(e)	SpMax2_Bh(p)
VE1_B(e)	Wi_B(i)
VE2_B(e)	X0sol
VE3_B(e)	SM2_L
VE1sign_B(e)	SpAD_AEA(bo)
VE2sign_B(e)	SpPos_B(e)
VR1_B(e)	SpAbs_B(p)
VR2_B(e)	MATS2i
VR3_B(e)	SpAD_AEA(dm)
Wi_B(p)	P_VSA_charge_10
WiA_B(p)	Eig03_EA(dm)
AVS_B(p)	SpAD_AEA(ri)
Chi_B(p)	ChiA_Dt
ChiA_B(p)	SpAD_B(m)
J_B(p)	Eig15_AEA(dm)
HyWi_B(p)	SpPosLog_B(s)
SpAbs_B(p)	Eig12_EA(bo)
SpPos_B(p)	SpAD_L
SpPosA_B(p)	SpMax2_Bh(i)
SpPosLog_B(p)	Wi_B(v)
SpMax_B(p)	VE3_B(m)
SpMaxA_B(p)	SM1_B(e)
SpDiam_B(p)	Eig13_AEA(ri)
SpAD_B(p)	Ho_B(v)
SpMAD_B(p)	SpPos_Dt
Ho_B(p)	SpAD_Dt
EE_B(p)	SM08_AEA(ri)
SM1_B(p)	Eig10_EA(ri)
SM2_B(p)	Eig13_EA(ed)
SM3_B(p)	SpAD_EA
SM4_B(p)	AVS_Dt
SM5_B(p)	GATS7s
SM6_B(p)	SM3_Dt
VE1_B(p)	SM4_Dt
VE2_B(p)	SpMaxA_B(s)
VE3_B(p)	SpPos_B(i)
VE1sign_B(p)	SpMax_Dt
VE2sign_B(p)	SM6_Dt
VR1_B(p)	X1Av
VR2_B(p)	BLI
VR3_B(p)	VR1_D/Dt
Wi_B(i)	VE1_Dz(v)
WiA_B(i)	SpPos_B(p)
AVS_B(i)	SM5_Dt
Chi_B(i)	F09[C-N]
ChiA_B(i)	Ho_Dt
J_B(i)	HyWi_H2
HyWi_B(i)	VE3_B(i)
SpAbs_B(i)	Wi_B(p)
SpPos_B(i)	H_D
SpPosA_B(i)	Wi_Dt
SpPosLog_B(i)	SpMax7_Bh(m)
SpMax_B(i)	SpPos_B(v)
SpMaxA_B(i)	SIC1
SpDiam_B(i)	JGI4
SpAD_B(i)	VR1_B(p)
SpMAD_B(i)	SpAD_B(p)
Ho_B(i)	VR1_B(v)
EE_B(i)	arLevel2
SM1_B(i)	Eig12_AEA(ri)
SM2_B(i)	X5sol
SM3_B(i)	HDcpx
SM4_B(i)	Infective-80
SM5_B(i)	VR1_X
SM6_B(i)	SRW05
VE1_B(i)	VE3_Dt
VE2_B(i)	HyWi_Dt
VE3_B(i)	X1sol
VE1sign_B(i)	SM2_Dt
VE2sign_B(i)	MLOGP2
VR1_B(i)	CMC-80
VR2_B(i)	VR1_A
VR3_B(i)	X0
Wi_B(s)	TPC
WiA_B(s)	nR05
AVS_B(s)	F02[N-O]
Chi_B(s)	P_VSA_charge_4
ChiA_B(s)	VE3_D
J_B(s)	J_Dt
HyWi_B(s)	Eig14_AEA(bo)
SpAbs_B(s)	VR1_H2
SpPos_B(s)	IDDM
SpPosA_B(s)	VE3_Dz(e)
SpPosLog_B(s)	VE3_Dz(Z)
SpMax_B(s)	VE3_Dz(m)
SpMaxA_B(s)	IDM
SpDiam_B(s)	VE3_Dz(v)
SpAD_B(s)	VE3_Dz(i)
SpMAD_B(s)	SM02_EA(ri)
Ho_B(s)	VR3_D/Dt
EE_B(s)	SpDiam_Dt
SM1_B(s)	Eig03_AEA(ri)
SM2_B(s)	SpAD_B(e)
SM3_B(s)	SHED_AL
SM4_B(s)	SpPosLog_Dt
SM5_B(s)	C-034
SM6_B(s)	Eta_betaS_A
VE1_B(s)	X4v
VE2_B(s)	Eig12_EA
VE3_B(s)	Ho_Dz(p)
VE1sign_B(s)	SM06_AEA(dm)
VE2sign_B(s)	BID
VR1_B(s)	SM5_X
VR2_B(s)	VR1_B(e)
VR3_B(s)	SpAD_B(v)
ATS1m	nBnz
ATS2m	VR1_D
ATS3m	Wap
ATS4m	VR1_L
ATS5m	SpMax6_Bh(m)
ATS6m	SpPos_L
ATS7m	MWC01
ATS8m	Eig13_EA
ATS1v	MPC01
ATS2v	SRW02
ATS3v	SM07_AEA(dm)
ATS4v	SpPosLog_B(m)
ATS5v	nBO
ATS6v	VR1_Dz(Z)
ATS7v	MATS8i
ATS8v	VR1_Dz(m)
ATS1e	VR1_Dz(p)
ATS2e	VE3_X
ATS3e	VR1_B(m)
ATS4e	VR1_Dz(i)
ATS5e	VR1_Dz(v)
ATS6e	VR1_B(s)
ATS7e	VR1_Dz(e)
ATS8e	SpPosLog_B(e)
ATS1p	SpMax8_Bh(m)
ATS2p	VE1sign_B(v)
ATS3p	Ho_L
ATS4p	VR1_B(i)
ATS5p	CATS2D_08_DL
ATS6p	SpMax4_Bh(m)
ATS7p	VE3_B(v)
ATS8p	VE2_L
ATS1i	DLS_06
ATS2i	VE2sign_L
ATS3i	SM1_B(i)
ATS4i	SM2_H2
ATS5i	SpDiam_AEA(ed)
ATS6i	GATS6e
ATS7i	X3Av
ATS8i	SpAD_H2
ATS1s	VR3_B(v)
ATS2s	SpPos_H2
ATS3s	J_X
ATS4s	EE_A
ATS5s	P_VSA_LogP_4
ATS6s	VR3_X
ATS7s	nHM
ATS8s	SpAD_B(i)
ATSC1m	CATS2D_03_AA
ATSC2m	CID
ATSC3m	SpMin1_Bh(m)
ATSC4m	Chi_X
ATSC5m	VR3_Dz(m)
ATSC6m	Eig12_EA(ri)
ATSC7m	SpPosLog_B(i)
ATSC8m	VR3_Dz(Z)
ATSC1v	VR3_Dz(e)
ATSC2v	VE2_Dz(p)
ATSC3v	VR3_D
ATSC4v	SM03_EA(dm)
ATSC5v	Ho_D
ATSC6v	VR3_Dz(v)
ATSC7v	TRS
ATSC8v	VR3_Dz(i)
ATSC1e	VR3_A
ATSC2e	nSK
ATSC3e	VR3_Dz(p)
ATSC4e	SpPosA_L
ATSC5e	VR3_L
ATSC6e	SpPosLog_L
ATSC7e	SpPosLog_B(p)
ATSC8e	Chi1_AEA(dm)
ATSC1p	Chi1_EA
ATSC2p	Chi1_AEA(ed)
ATSC3p	Chi1_AEA(bo)
ATSC4p	IC5
ATSC5p	Chi1_AEA(ri)
ATSC6p	VR3_B(m)
ATSC7p	VE1_L
ATSC8p	VR1_Dt
ATSC1i	VE1sign_L
ATSC2i	SpPosLog_X
ATSC3i	VR3_B(p)
ATSC4i	SpPosLog_B(v)
ATSC5i	VR3_B(e)
ATSC6i	VR3_H2
ATSC7i	Ho_Dz(v)
ATSC8i	MATS7p
ATSC1s	MATS6p
ATSC2s	VR3_B(s)
ATSC3s	SpPosLog_H2
ATSC4s	Psi_e_0
ATSC5s	Chi_B(v)
ATSC6s	Eta_alpha
ATSC7s	Eig14_EA(ed)
ATSC8s	SM09_AEA(ri)
MATS1m	VR3_B(i)
MATS2m	Chi0_EA(ri)
MATS3m	Eig11_EA(ed)
MATS4m	SM06_AEA(ri)
MATS5m	VE3sign_L
MATS6m	VE3_L
MATS7m	GD
MATS8m	nCIC
MATS1v	GATS7e
MATS2v	SpPosLog_A
MATS3v	VE3_Dz(p)
MATS4v	SpMaxA_X
MATS5v	ATSC6s
MATS6v	VE1_B(i)
MATS7v	nTA
MATS8v	EE_X
MATS1e	Eta_LR
MATS2e	SpAD_EA(ri)
MATS3e	SM1_B(v)
MATS4e	Chi_B(p)
MATS5e	X1
MATS6e	HyWi_X
MATS7e	Ho_A
MATS8e	VR3_Dt
MATS1p	Ho_H2
MATS2p	VE1_B(m)
MATS3p	Eta_epsi_3
MATS4p	SpMax5_Bh(v)
MATS5p	SM1_B(p)
MATS6p	Xt
MATS7p	X5
MATS8p	SNar
MATS1i	GMTI
MATS2i	VE1_Dz(p)
MATS3i	J_A
MATS4i	VE1_Dt
MATS5i	CENT
MATS6i	VE2_Dt
MATS7i	MDEN-23
MATS8i	SpPos_A
MATS1s	SpAD_A
MATS2s	O-060
MATS3s	WiA_B(p)
MATS4s	Uindex
MATS5s	SpMaxA_AEA(ri)
MATS6s	Eta_epsi
MATS7s	DLS_01
MATS8s	F10[N-O]
GATS1m	LPRS
GATS2m	IVDM
GATS3m	Chi_B(i)
GATS4m	Eig14_EA(ri)
GATS5m	ATS8e
GATS6m	Ho_X
GATS7m	MATS8m
GATS8m	Chi0_AEA(bo)
GATS1v	SpPosLog_D
GATS2v	Chi_B(m)
GATS3v	Chi0_AEA(dm)
GATS4v	Chi0_AEA(ri)
GATS5v	SpMAD_B(e)
GATS6v	Chi0_AEA(ed)
GATS7v	Chi0_EA
GATS8v	SpMaxA_L
GATS1e	SpMaxA_EA(ri)
GATS2e	IDET
GATS3e	WiA_B(i)
GATS4e	MATS6i
GATS5e	SpAD_X
GATS6e	SpPos_X
GATS7e	Chi_D/Dt
GATS8e	Eig14_AEA(dm)
GATS1p	SpMaxA_AEA(dm)
GATS2p	Eig03_EA(ri)
GATS3p	WiA_B(v)
GATS4p	Chi_B(e)
GATS5p	SpMax5_Bh(p)
GATS6p	VE3_D/Dt
GATS7p	X3v
GATS8p	SpMax5_Bh(e)
GATS1i	SMTI
GATS2i	WiA_B(e)
GATS3i	Eig12_AEA(dm)
GATS4i	VE2_Dz(v)
GATS5i	TIC2
GATS6i	SpPosLog_Dz(p)
GATS7i	Ho_Dz(i)
GATS8i	WiA_D/Dt
GATS1s	P_VSA_m_4
GATS2s	SpMAD_B(v)
GATS3s	SpPosLog_Dz(i)
GATS4s	SPP
GATS5s	BIC4
GATS6s	QW_L
GATS7s	SM05_EA(dm)
GATS8s	SpPosLog_D/Dt
GGI1	Psi_i_0
GGI2	Chi_H2
GGI3	SpMAD_AEA(ed)
GGI4	SpMaxA_A
GGI5	IDMT
GGI6	SpMin3_Bh(i)
GGI7	SpPosLog_Dz(v)
GGI8	Wi_D
GGI9	Xu
GGI10	SM2_X
JGI1	Eig15_AEA(bo)
JGI2	MATS5e
JGI3	P_VSA_MR_6
JGI4	ON1
JGI5	VE2_B(v)
JGI6	ATS8v
JGI7	BIC2
JGI8	Eig14_EA(bo)
JGI9	SpPosLog_Dz(e)
JGI10	Psi_e_t
JGT	S1K
SpMax1_Bh(m)	VE2_B(m)
SpMax2_Bh(m)	PJI2
SpMax3_Bh(m)	AMR
SpMax4_Bh(m)	SpPosLog_Dz(Z)
SpMax5_Bh(m)	qnmax
SpMax6_Bh(m)	SpMin6_Bh(v)
SpMax7_Bh(m)	SpMin6_Bh(e)
SpMax8_Bh(m)	SpPosLog_Dz(m)
SpMax1_Bh(v)	Psi_i_1
SpMax2_Bh(v)	WiA_H2
SpMax3_Bh(v)	MaxaasC
SpMax4_Bh(v)	GATS8v
SpMax5_Bh(v)	Eig13_EA(bo)
SpMax6_Bh(v)	BIC5
SpMax7_Bh(v)	Ho_Dz(e)
SpMax8_Bh(v)	J_H2
SpMax1_Bh(e)	Eig14_AEA(ri)
SpMax2_Bh(e)	ChiA_D
SpMax3_Bh(e)	J_B(v)
SpMax4_Bh(e)	J_B(p)
SpMax5_Bh(e)	SpMax3_Bh(m)
SpMax6_Bh(e)	P_VSA_charge_6
SpMax7_Bh(e)	SpMin2_Bh(m)
SpMax8_Bh(e)	SM4_X
SpMax1_Bh(p)	minssCH2
SpMax2_Bh(p)	ATS4v
SpMax3_Bh(p)	SpMaxA_H2
SpMax4_Bh(p)	Eig04_AEA(ed)
SpMax5_Bh(p)	CATS2D_08_AA
SpMax6_Bh(p)	X1Mad
SpMax7_Bh(p)	mindO
SpMax8_Bh(p)	B10[N-N]
SpMax1_Bh(i)	SpMin6_Bh(p)
SpMax2_Bh(i)	SpMaxA_B(i)
SpMax3_Bh(i)	P_VSA_ppp_L
SpMax4_Bh(i)	Chi_B(s)
SpMax5_Bh(i)	J_B(e)
SpMax6_Bh(i)	MRcons
SpMax7_Bh(i)	VE3_B(s)
SpMax8_Bh(i)	X2v
SpMax1_Bh(s)	MR99
SpMax2_Bh(s)	J_B(m)
SpMax3_Bh(s)	X0v
SpMax4_Bh(s)	J_B(i)
SpMax5_Bh(s)	WiA_B(m)
SpMax6_Bh(s)	SM12_AEA(bo)
SpMax7_Bh(s)	Eig04_EA
SpMax8_Bh(s)	SpMaxA_B(p)
SpMin1_Bh(m)	AVS_D
SpMin2_Bh(m)	Chi0_EA(bo)
SpMin3_Bh(m)	C-002
SpMin4_Bh(m)	Wi_D/Dt
SpMin5_Bh(m)	VE2_Dz(i)
SpMin6_Bh(m)	SM6_X
SpMin7_Bh(m)	SM3_D
SpMin8_Bh(m)	SpMax3_Bh(v)
SpMin1_Bh(v)	Chi0_EA(ed)
SpMin2_Bh(v)	SpMaxA_EA
SpMin3_Bh(v)	CATS2D_04_LL
SpMin4_Bh(v)	P_VSA_ppp_ar
SpMin5_Bh(v)	F07[C-C]
SpMin6_Bh(v)	SpMax3_Bh(p)
SpMin7_Bh(v)	SM08_AEA(dm)
SpMin8_Bh(v)	Eig14_EA
SpMin1_Bh(e)	Chi1_EA(bo)
SpMin2_Bh(e)	SpMin6_Bh(i)
SpMin3_Bh(e)	VE2sign_A
SpMin4_Bh(e)	SpMaxA_B(v)
SpMin5_Bh(e)	VE2sign_H2
SpMin6_Bh(e)	SM4_D
SpMin7_Bh(e)	SM6_D
SpMin8_Bh(e)	F05[O-O]
SpMin1_Bh(p)	VE2_D
SpMin2_Bh(p)	SM5_D
SpMin3_Bh(p)	SpPos_D
SpMin4_Bh(p)	SpMax_D
SpMin5_Bh(p)	SpAD_D
SpMin6_Bh(p)	GATS3m
SpMin7_Bh(p)	VE2_Dz(m)
SpMin8_Bh(p)	VE2_Dz(Z)
SpMin1_Bh(i)	SpMaxA_B(e)
SpMin2_Bh(i)	ATSC8i
SpMin3_Bh(i)	SM13_AEA(dm)
SpMin4_Bh(i)	ATS1v
SpMin5_Bh(i)	VE2_Dz(e)
SpMin6_Bh(i)	Eig04_EA(ed)
SpMin7_Bh(i)	SpMin7_Bh(v)
SpMin8_Bh(i)	Eig15_EA(ed)
SpMin1_Bh(s)	Eta_C
SpMin2_Bh(s)	SM10_AEA(ri)
SpMin3_Bh(s)	Eig11_EA(ri)
SpMin4_Bh(s)	F08[C-N]
SpMin5_Bh(s)	SM2_D
SpMin6_Bh(s)	HyWi_D
SpMin7_Bh(s)	SpMin1_Bh(i)
SpMin8_Bh(s)	Wi_Dz(e)
P_VSA_LogP_1	ATS3v
P_VSA_LogP_2	ATS7v
P_VSA_LogP_3	Wi_Dz(i)
P_VSA_LogP_4	Wi_Dz(v)
P_VSA_LogP_5	X5v
P_VSA_LogP_6	MaxDD
P_VSA_LogP_7	UNIP
P_VSA_LogP_8	Eig11_AEA(ri)
P_VSA_MR_1	Rperim
P_VSA_MR_2	Eig11_EA
P_VSA_MR_3	MATS8s
P_VSA_MR_4	SM05_AEA(dm)
P_VSA_MR_5	TI1_L
P_VSA_MR_6	SM09_AEA(dm)
P_VSA_MR_7	Wi_Dz(m)
P_VSA_MR_8	Wi_Dz(Z)
P_VSA_m_1	Eig15_EA
P_VSA_m_2	Eig15_EA(ri)
P_VSA_m_3	ATS5v
P_VSA_m_4	F-084
P_VSA_m_5	Neoplastic-80
P_VSA_v_1	Eig04_AEA(ri)
P_VSA_v_2	SpMin3_Bh(e)
P_VSA_v_3	SpDiam_D
P_VSA_v_4	HyWi_D/Dt
P_VSA_e_1	Eig04_EA(ri)
P_VSA_e_2	GATS4v
P_VSA_e_3	VE2_B(i)
P_VSA_e_4	ATS8i
P_VSA_e_5	F10[N-N]
P_VSA_e_6	Ho_Dz(Z)
P_VSA_p_1	Ho_Dz(m)
P_VSA_p_2	SpMAD_B(i)
P_VSA_p_3	H_Dt
P_VSA_p_4	IAC
P_VSA_i_1	SpMin5_Bh(i)
P_VSA_i_2	TIC0
P_VSA_i_3	F06[C-C]
P_VSA_i_4	Sv
P_VSA_s_1	CATS2D_04_DD
P_VSA_s_2	Wi_Dz(p)
P_VSA_s_3	VE3_B(p)
P_VSA_s_4	SpPos_D/Dt
P_VSA_s_5	MATS6e
P_VSA_s_6	SpAD_D/Dt
P_VSA_ppp_L	Eig15_AEA(ri)
P_VSA_ppp_P	SM04_EA(dm)
P_VSA_ppp_N	RDCHI
P_VSA_ppp_D	SpMax4_Bh(e)
P_VSA_ppp_A	ATSC7i
P_VSA_ppp_ar	P_VSA_e_2
P_VSA_ppp_con	SpMaxA_AEA(ed)
P_VSA_ppp_hal	SpMax8_Bh(e)
P_VSA_ppp_cyc	DBI
P_VSA_ppp_ter	TIC3
P_VSA_charge_1	ATS6v
P_VSA_charge_2	SpMin6_Bh(m)
P_VSA_charge_3	J_B(s)
P_VSA_charge_4	C-006
P_VSA_charge_5	F02[C-C]
P_VSA_charge_6	SpMin8_Bh(p)
P_VSA_charge_7	ATS8p
P_VSA_charge_8	SAtot
P_VSA_charge_9	ATS2v
P_VSA_charge_10	SpMax6_Bh(v)
P_VSA_charge_11	Ho_D/Dt
P_VSA_charge_12	ECC
P_VSA_charge_13	MATS4v
P_VSA_charge_14	gmax
Eta_alpha	Eig03_AEA(dm)
Eta_alpha_A	F04[C-C]
Eta_epsi	SpMax5_Bh(i)
Eta_epsi_A	STN_L
Eta_betaS	SHED_DA
Eta_betaS_A	CSI
Eta_betaP	VE2_H2
Eta_betaP_A	SpMaxA_AEA(bo)
Eta_beta	VE1_D/Dt
Eta_beta_A	PDI
Eta_C	Eig15_EA(bo)
Eta_C_A	ATSC8p
Eta_L	GATS3i
Eta_L_A	B06[C-F]
Eta_R	SM3_Dz(v)
Eta_F	ChiA_Dz(e)
Eta_F_A	CIC2
Eta_LR	Chi1_EA(ed)
Eta_FL	SpMax3_Bh(e)
Eta_FL_A	SpMin7_Bh(p)
Eta_B	WiA_B(s)
Eta_B_A	Hypertens-80
Eta_sh_p	VvdwMG
Eta_sh_y	SM5_Dz(v)
Eta_sh_x	ATS7p
Eta_D_AlphaA	Vx
Eta_D_AlphaB	SM3_Dz(e)
Eta_epsi_2	SpDiam_D/Dt
Eta_epsi_3	AVS_Dz(v)
Eta_epsi_4	ATSC8m
Eta_epsi_5	P_VSA_LogP_3
Eta_D_epsiA	nLevel10
Eta_D_epsiB	P_VSA_charge_13
Eta_D_epsiC	AVS_Dz(e)
Eta_D_epsiD	SpMax8_Bh(i)
Eta_psi1	SpMax2_Bh(s)
Eta_D_psiA	ATS6e
Eta_D_psiB	JGI5
Eta_D_beta	SpAbs_Dz(v)
Eta_D_beta_A	VE2_A
SpMax_EA	SM3_Dz(i)
SpMaxA_EA	ATSC6i
SpDiam_EA	RNCG
SpAD_EA	F05[C-C]
SpMAD_EA	ChiA_D/Dt
SpMax_EA(ed)	SpMax6_Bh(p)
SpMaxA_EA(ed)	ATS4p
SpDiam_EA(ed)	SpMax4_Bh(i)
SpAD_EA(ed)	SM07_EA(dm)
SpMAD_EA(ed)	Xindex
SpMax_EA(bo)	B10[N-O]
SpMaxA_EA(bo)	SM3_Dz(p)
SpDiam_EA(bo)	SM6_Dz(e)
SpAD_EA(bo)	SM5_Dz(e)
SpMAD_EA(bo)	SM4_Dz(e)
SpMax_EA(dm)	VvdwZAZ
SpMaxA_EA(dm)	SpAbs_Dz(e)
SpDiam_EA(dm)	SpPos_Dz(e)
SpAD_EA(dm)	CATS2D_05_DA
SpMAD_EA(dm)	SpMax_Dz(e)
SpMax_EA(ri)	GATS6v
SpMaxA_EA(ri)	F03[C-S]
SpDiam_EA(ri)	SpAD_Dz(e)
SpAD_EA(ri)	ATS5p
SpMAD_EA(ri)	Acon
SpMax_AEA(ed)	AVS_Dz(i)
SpMaxA_AEA(ed)	ChiA_Dz(i)
SpDiam_AEA(ed)	SpPos_Dz(v)
SpAD_AEA(ed)	SM4_Dz(v)
SpMAD_AEA(ed)	SM6_Dz(v)
SpMax_AEA(bo)	ATS6i
SpMaxA_AEA(bo)	SpMaxA_D/Dt
SpDiam_AEA(bo)	SpMax_Dz(v)
SpAD_AEA(bo)	P_VSA_i_2
SpMAD_AEA(bo)	BIC1
SpMax_AEA(dm)	SM5_Dz(i)
SpMaxA_AEA(dm)	SpAD_Dz(v)
SpDiam_AEA(dm)	ATS7e
SpAD_AEA(dm)	F06[C-F]
SpMAD_AEA(dm)	B07[C-S]
SpMax_AEA(ri)	B06[C-S]
SpMaxA_AEA(ri)	HyWi_Dz(e)
SpDiam_AEA(ri)	SpMax_Dz(i)
SpAD_AEA(ri)	ATS1p
SpMAD_AEA(ri)	AVS_D/Dt
Chi0_EA	SpPos_Dz(i)
Chi1_EA	ATS5e
Chi0_EA(ed)	B07[N-F]
Chi1_EA(ed)	SpAD_Dz(i)
Chi0_EA(bo)	SM2_D/Dt
Chi1_EA(bo)	SpMax8_Bh(v)
Chi0_EA(dm)	X1v
Chi1_EA(dm)	SM6_Dz(i)
Chi0_EA(ri)	Psi_e_A
Chi1_EA(ri)	Psi_i_A
Chi0_AEA(ed)	ATSC5i
Chi1_AEA(ed)	SM4_Dz(i)
Chi0_AEA(bo)	SpMin2_Bh(p)
Chi1_AEA(bo)	ChiA_Dz(Z)
Chi0_AEA(dm)	ChiA_Dz(m)
Chi1_AEA(dm)	VAR
Chi0_AEA(ri)	ATS5i
Chi1_AEA(ri)	SpMin8_Bh(i)
SM02_EA	X0Av
SM03_EA	VE1sign_B(i)
SM04_EA	SpAbs_Dz(i)
SM05_EA	JGI10
SM06_EA	ChiA_Dz(v)
SM07_EA	BAC
SM08_EA	SpMin8_Bh(v)
SM09_EA	SM2_Dz(e)
SM10_EA	NaaCH
SM11_EA	SM09_EA(dm)
SM12_EA	SM4_D/Dt
SM13_EA	SpMax7_Bh(e)
SM14_EA	SM2_Dz(v)
SM15_EA	SM6_D/Dt
SM02_EA(ed)	AVS_Dz(m)
SM03_EA(ed)	HyWi_Dz(v)
SM04_EA(ed)	AVS_Dz(Z)
SM05_EA(ed)	nCp
SM06_EA(ed)	Vindex
SM07_EA(ed)	SM5_D/Dt
SM08_EA(ed)	ATS6p
SM09_EA(ed)	EE_D/Dt
SM10_EA(ed)	SpMax_D/Dt
SM11_EA(ed)	SpMax4_Bh(v)
SM12_EA(ed)	Eta_D_epsiD
SM13_EA(ed)	SpAbs_Dz(p)
SM14_EA(ed)	SpPosA_B(s)
SM15_EA(ed)	SpDiam_Dz(v)
SM02_EA(bo)	T(O..S)
SM03_EA(bo)	F02[C-S]
SM04_EA(bo)	F02[C-F]
SM05_EA(bo)	P_VSA_s_4
SM06_EA(bo)	SM3_Dz(m)
SM07_EA(bo)	T(N..S)
SM08_EA(bo)	SM3_Dz(Z)
SM09_EA(bo)	HyWi_Dz(i)
SM10_EA(bo)	SpMax7_Bh(v)
SM11_EA(bo)	SpMax8_Bh(p)
SM12_EA(bo)	T(N..F)
SM13_EA(bo)	HyWi_Dz(m)
SM14_EA(bo)	HyWi_Dz(Z)
SM15_EA(bo)	SpAD_Dz(p)
SM02_EA(dm)	SM6_Dz(Z)
SM03_EA(dm)	SM4_Dz(Z)
SM04_EA(dm)	SM4_Dz(m)
SM05_EA(dm)	TIC5
SM06_EA(dm)	SpAD_Dz(Z)
SM07_EA(dm)	SpAD_Dz(m)
SM08_EA(dm)	SpPos_Dz(Z)
SM09_EA(dm)	SpAbs_Dz(Z)
SM10_EA(dm)	SpAbs_Dz(m)
SM11_EA(dm)	SpPos_Dz(m)
SM12_EA(dm)	SM6_Dz(m)
SM13_EA(dm)	F07[N-F]
SM14_EA(dm)	B01[C-S]
SM15_EA(dm)	F03[C-C]
SM02_EA(ri)	B03[C-S]
SM03_EA(ri)	B05[C-S]
SM04_EA(ri)	B02[C-S]
SM05_EA(ri)	GATS6s
SM06_EA(ri)	GATS3s
SM07_EA(ri)	SpMax_Dz(m)
SM08_EA(ri)	SM3_D/Dt
SM09_EA(ri)	SpMax_Dz(Z)
SM10_EA(ri)	SpDiam_Dz(i)
SM11_EA(ri)	TIC4
SM12_EA(ri)	SpMin2_Bh(i)
SM13_EA(ri)	SM5_Dz(p)
SM14_EA(ri)	SM5_Dz(Z)
SM15_EA(ri)	SpMin8_Bh(e)
SM02_AEA(ed)	SpPos_Dz(p)
SM03_AEA(ed)	nC
SM04_AEA(ed)	SM11_EA(dm)
SM05_AEA(ed)	ON0V
SM06_AEA(ed)	D/Dtr06
SM07_AEA(ed)	AVS_Dz(p)
SM08_AEA(ed)	SM2_Dz(i)
SM09_AEA(ed)	SM5_Dz(m)
SM10_AEA(ed)	P_VSA_ppp_ter
SM11_AEA(ed)	SpMax_Dz(p)
SM12_AEA(ed)	F08[C-F]
SM13_AEA(ed)	SpDiam_Dz(e)
SM14_AEA(ed)	SpMax_B(s)
SM15_AEA(ed)	SM13_EA(dm)
SM02_AEA(bo)	SpMax3_Bh(i)
SM03_AEA(bo)	SM6_Dz(p)
SM04_AEA(bo)	nS
SM05_AEA(bo)	MeanTD
SM06_AEA(bo)	WiA_D
SM07_AEA(bo)	CATS2D_05_DL
SM08_AEA(bo)	S2K
SM09_AEA(bo)	ATS1e
SM10_AEA(bo)	SM4_Dz(p)
SM11_AEA(bo)	ATS2p
SM12_AEA(bo)	X1Kup
SM13_AEA(bo)	HyWi_Dz(p)
SM14_AEA(bo)	SM2_Dz(m)
SM15_AEA(bo)	ATSC6p
SM02_AEA(dm)	SM15_EA(dm)
SM03_AEA(dm)	SpDiam_Dz(m)
SM04_AEA(dm)	SM2_Dz(Z)
SM05_AEA(dm)	SpDiam_Dz(Z)
SM06_AEA(dm)	ATSC7p
SM07_AEA(dm)	SpMax6_Bh(e)
SM08_AEA(dm)	LLS_01
SM09_AEA(dm)	CATS2D_06_DA
SM10_AEA(dm)	F08[C-C]
SM11_AEA(dm)	SpMin5_Bh(e)
SM12_AEA(dm)	SM2_Dz(p)
SM13_AEA(dm)	ATSC5p
SM14_AEA(dm)	SssNH
SM15_AEA(dm)	SpMax1_Bh(s)
SM02_AEA(ri)	SpMin5_Bh(p)
SM03_AEA(ri)	ATSC4i
SM04_AEA(ri)	ATSC4p
SM05_AEA(ri)	ChiA_Dz(p)
SM06_AEA(ri)	X1MulPer
SM07_AEA(ri)	SpMax7_Bh(i)
SM08_AEA(ri)	Eta_psi1
SM09_AEA(ri)	SM06_EA(dm)
SM10_AEA(ri)	Eta_D_psiA
SM11_AEA(ri)	F07[C-S]
SM12_AEA(ri)	SpMAD_X
SM13_AEA(ri)	SpPosA_X
SM14_AEA(ri)	C-005
SM15_AEA(ri)	Sp
Eig01_EA	X1Per
Eig02_EA	P_VSA_i_1
Eig03_EA	ATS3p
Eig04_EA	F10[C-F]
Eig05_EA	SpMaxA_D
Eig06_EA	SpMAD_D
Eig07_EA	SpPosA_D
Eig08_EA	SpMax6_Bh(i)
Eig09_EA	ATS7i
Eig10_EA	VE1_B(v)
Eig11_EA	CATS2D_03_LL
Eig12_EA	F01[C-F]
Eig13_EA	F03[C-F]
Eig14_EA	nF
Eig15_EA	F01[C-C]
Eig01_EA(ed)	NsF
Eig02_EA(ed)	P_VSA_e_6
Eig03_EA(ed)	SpDiam_Dz(p)
Eig04_EA(ed)	F07[C-N]
Eig05_EA(ed)	SpMax7_Bh(p)
Eig06_EA(ed)	SpMAD_B(s)
Eig07_EA(ed)
Eig08_EA(ed)
Eig09_EA(ed)
Eig10_EA(ed)
Eig11_EA(ed)
Eig12_EA(ed)
Eig13_EA(ed)
Eig14_EA(ed)
Eig15_EA(ed)
Eig01_EA(bo)
Eig02_EA(bo)
Eig03_EA(bo)
Eig04_EA(bo)
Eig05_EA(bo)
Eig06_EA(bo)
Eig07_EA(bo)
Eig08_EA(bo)
Eig09_EA(bo)
Eig10_EA(bo)
Eig11_EA(bo)
Eig12_EA(bo)
Eig13_EA(bo)
Eig14_EA(bo)
Eig15_EA(bo)
Eig01_EA(dm)
Eig02_EA(dm)
Eig03_EA(dm)
Eig04_EA(dm)
Eig05_EA(dm)
Eig06_EA(dm)
Eig07_EA(dm)
Eig08_EA(dm)
Eig09_EA(dm)
Eig10_EA(dm)
Eig11_EA(dm)
Eig12_EA(dm)
Eig13_EA(dm)
Eig14_EA(dm)
Eig15_EA(dm)
Eig01_EA(ri)
Eig02_EA(ri)
Eig03_EA(ri)
Eig04_EA(ri)
Eig05_EA(ri)
Eig06_EA(ri)
Eig07_EA(ri)
Eig08_EA(ri)
Eig09_EA(ri)
Eig10_EA(ri)
Eig11_EA(ri)
Eig12_EA(ri)
Eig13_EA(ri)
Eig14_EA(ri)
Eig15_EA(ri)
Eig01_AEA(ed)
Eig02_AEA(ed)
Eig03_AEA(ed)
Eig04_AEA(ed)
Eig05_AEA(ed)
Eig06_AEA(ed)
Eig07_AEA(ed)
Eig08_AEA(ed)
Eig09_AEA(ed)
Eig10_AEA(ed)
Eig11_AEA(ed)
Eig12_AEA(ed)
Eig13_AEA(ed)
Eig14_AEA(ed)
Eig15_AEA(ed)
Eig01_AEA(bo)
Eig02_AEA(bo)
Eig03_AEA(bo)
Eig04_AEA(bo)
Eig05_AEA(bo)
Eig06_AEA(bo)
Eig07_AEA(bo)
Eig08_AEA(bo)
Eig09_AEA(bo)
Eig10_AEA(bo)
Eig11_AEA(bo)
Eig12_AEA(bo)
Eig13_AEA(bo)
Eig14_AEA(bo)
Eig15_AEA(bo)
Eig01_AEA(dm)
Eig02_AEA(dm)
Eig03_AEA(dm)
Eig04_AEA(dm)
Eig05_AEA(dm)
Eig06_AEA(dm)
Eig07_AEA(dm)
Eig08_AEA(dm)
Eig09_AEA(dm)
Eig10_AEA(dm)
Eig11_AEA(dm)
Eig12_AEA(dm)
Eig13_AEA(dm)
Eig14_AEA(dm)
Eig15_AEA(dm)
Eig01_AEA(ri)
Eig02_AEA(ri)
Eig03_AEA(ri)
Eig04_AEA(ri)
Eig05_AEA(ri)
Eig06_AEA(ri)
Eig07_AEA(ri)
Eig08_AEA(ri)
Eig09_AEA(ri)
Eig10_AEA(ri)
Eig11_AEA(ri)
Eig12_AEA(ri)
Eig13_AEA(ri)
Eig14_AEA(ri)
Eig15_AEA(ri)
nCp
nCs
nCt
nCq
nCrs
nCrt
nCrq
nCar
nCbH
nCb-
nCconj
nR=Cp
nR=Cs
nR=Ct
n=C=
nR#CH/X
nR#C-
nROCN
nArOCN
nRNCO
nArNCO
nRSCN
nArSCN
nRNCS
nArNCS
nRCOOH
nArCOOH
nRCOOR
nArCOOR
nRCONH2
nArCONH2
nRCONHR
nArCONHR
nRCONR2
nArCONR2
nROCON
nArOCON
nRCOX
nArCOX
nRCSOH
nArCSOH
nRCSSH
nArCSSH
nRCOSR
nArCOSR
nRCSSR
nArCSSR
nRCHO
nArCHO
nRCO
nArCO
nCONN
nC=O(O)2
nN=C-N<
nC(=N)N2
nRC=N
nArC=N
nRCNO
nArCNO
nRNH2
nArNH2
nRNHR
nArNHR
nRNR2
nArNR2
nN-N
nN=N
nRCN
nArCN
nN+
nNq
nRNHO
nArNHO
nRNNOx
nArNNOx
nRNO
nArNO
nRNO2
nArNO2
nN(CO)2
nC=N-N<
nROH
nArOH
nOHp
nOHs
nOHt
nROR
nArOR
nROX
nArOX
nO(C=O)2
nH2O
nSH
nC=S
nRSR
nRSSR
nSO
nS(=O)2
nSOH
nSOOH
nSO2OH
nSO3OH
nSO2
nSO3
nSO4
nSO2N
nPO3
nPO4
nPR3
nP(=O)O2R
nP(=O)R3/nPR5
nCH2RX
nCHR2X
nCR3X
nR=CHX
nR=CRX
nR#CX
nCHRX2
nCR2X2
nR=CX2
nCRX3
nArX
nCXr
nCXr=
nCconjX
nAziridines
nOxiranes
nThiranes
nAzetidines
nOxetanes
nThioethanes
nBeta-Lactams
nPyrrolidines
nOxolanes
ntH-Thiophenes
nPyrroles
nPyrazoles
nImidazoles
nFuranes
nThiophenes
nOxazoles
nIsoxazoles
nThiazoles
nIsothiazoles
nTriazoles
nPyridines
nPyridazines
nPyrimidines
nPyrazines
n135-Triazines
n124-Triazines
nHDon
nHAcc
C-001
C-002
C-003
C-004
C-005
C-006
C-007
C-008
C-009
C-010
C-011
C-012
C-013
C-014
C-015
C-016
C-017
C-018
C-019
C-020
C-021
C-022
C-023
C-024
C-025
C-026
C-027
C-028
C-029
C-030
C-031
C-032
C-033
C-034
C-035
C-036
C-037
C-038
C-039
C-040
C-041
C-042
C-043
C-044
H-046
H-047
H-048
H-049
H-050
H-051
H-052
H-053
H-054
H-055
O-056
O-057
O-058
O-059
O-060
O-061
O-062
O-063
Se-064
Se-065
N-066
N-067
N-068
N-069
N-070
N-071
N-072
N-073
N-074
N-075
N-076
N-077
N-078
N-079
F-081
F-082
F-083
F-084
F-085
Cl-086
Cl-087
Cl-088
Cl-089
Cl-090
Br-091
Br-092
Br-093
Br-094
Br-095
I-096
I-097
I-098
I-099
I-100
F-101
Cl-102
Br-103
I-104
S-106
S-107
S-108
S-109
S-110
Si-111
B-112
P-115
P-116
P-117
P-118
P-119
P-120
SsCH3
SdCH2
SssCH2
StCH
SdsCH
SaaCH
SsssCH
SddC
StsC
SdssC
SaasC
SaaaC
SssssC
SsNH2
SssNH
SdNH
SsssN
SdsN
SaaN
StN
SsNH3+
SssNH2+
SdNH2+
SsssNH+
SssssN+
SddsN
SaadN
SaasN
SaaNH
SsOH
SdO
SssO
SaaO
SsPH2
SssPH
SsssP
SdsssP
SddsP
SsssssP
SsSH
SdS
SssS
SaaS
SdssS
SddssS
SssssssS
SsF
SsCl
SsBr
SsI
SsLi
SssBe
SssssBe-
SsBH2
SssBH
SsssB
SssssB-
SsGeH3
SssGeH2
SsssGeH
SssssGe
SsAsH2
SssAsH
SsssAs
SsssssAs
SdsssAs
SddsAs
SsSeH
SdSe
SssSe
SaaSe
SdssSe
SssssssSe
SddssSe
SsSnH3
SssSnH2
SsssSnH
SssssSn
SsPbH3
SssPbH2
SsssPbH
SssssPb
SsSiH3
SssSiH2
SsssSiH
SssssSi
NsCH3
NdCH2
NssCH2
NtCH
NdsCH
NaaCH
NsssCH
NddC
NtsC
NdssC
NaasC
NaaaC
NssssC
NsNH2
NssNH
NdNH
NsssN
NdsN
NaaN
NtN
NsNH3+
NssNH2+
NdNH2+
NsssNH+
NssssN+
NddsN
[truncated: 2,146 more rows]

## Sheet: 3. HSV-1
Supplementary Data 4. The optimal combination of descriptors of each algorithm
Bioactivity dataset 1. Biological toxicology
Descriptprs-Original (n=3719)	Descriptprs-Wilcoxon (n=166)	Descriptprs-Spearman (n=58)	Descriptprs -XGBoost (n=31)	Descriptprs-DT (n=57)	Descriptprs-RFE (LR, n=51)	Descriptprs-RF (n=5)
MW	SAscore	SAscore	SAscore	WiA_D/Dt	SAscore	JGI4
AMW	WiA_D/Dt	WiA_D/Dt	WiA_D/Dt	J_D/Dt	WiA_D/Dt	ChiA_B(e)
Se	J_D/Dt	J_D/Dt	J_D/Dt	GATS3m	GATS3m	GATS7m
Sp	SpMaxA_D/Dt	GATS3m	GATS3m	P_VSA_charge_1	P_VSA_charge_1	MATS1i
Si	Chi_D/Dt	P_VSA_charge_1	P_VSA_charge_1	QED	QED	SpMAD_EA(ri)
Me	GATS3m	QED	QED	CATS2D_04_LL	CATS2D_04_LL
Mp	P_VSA_charge_1	CATS2D_04_LL	CATS2D_04_LL	JGI8	JGI8
Mi	NNRS	JGI8	JGI8	F04[O-O]	F04[O-O]
GD	QED	F04[O-O]	F04[O-O]	HVcpx	HVcpx
nAT	RCI	HVcpx	HVcpx	nR=Cs	nR=Cs
nSK	CATS2D_04_LL	nR=Cs	nR=Cs	JGI9	JGI9
nAA	Rbrid	JGI9	JGI9	Eta_B	Eta_B
nTA	SpPosA_D/Dt	Eta_B	Eta_B	CATS2D_02_AL	CATS2D_02_AL
nBT	SpMAD_D/Dt	CATS2D_02_AL	CATS2D_02_AL	Eta_B_A	Eta_B_A
nBO	RFD	Eta_B_A	Eta_B_A	CATS2D_07_DL	CATS2D_07_DL
nBM	JGI8	CATS2D_07_DL	CATS2D_08_DL	B03[C-S]	B03[C-S]
SCBO	F04[O-O]	B03[C-S]	GATS2m	CATS2D_06_LL	CATS2D_06_LL
RBN	QEDu	CATS2D_06_LL	minssNH	piPC09	piPC09
RBF	HVcpx	piPC09	CATS2D_04_AA	SM11_AEA(dm)	SM11_AEA(dm)
nDB	nR=Cs	SM11_AEA(dm)	GATS4m	CATS2D_08_DL	CATS2D_08_DL
nTB	JGI9	CATS2D_08_DL	max_conj_path	SpMax_H2	SpMax_H2
nAB	B04[O-O]	SpMax_H2	MATS4e	PW5	GATS2m
nH	Eta_B	PW5	GGI4	GATS2m	SpMAD_AEA(bo)
nC	CATS2D_02_AL	GATS2m	VE2sign_B(p)	minssNH	C-006
nN	Eta_B_A	minssNH	Eig06_EA(bo)	SpMAD_AEA(bo)	CATS2D_04_AA
nO	CATS2D_07_DL	SpMAD_AEA(bo)	nCconj	C-006	GATS4m
nP	B03[C-S]	C-006	P_VSA_ppp_D	CATS2D_04_AA	max_conj_path
nS	CATS2D_06_LL	CATS2D_04_AA	MATS1m	GATS4m	GGI4
nF	nCIR	GATS4m	CENT	max_conj_path	VE2sign_B(p)
nCL	piPC09	max_conj_path	MaxssssC	MATS4e	nR10
nBR	SM11_AEA(dm)	MATS4e	GATS7m	GGI4	F03[C-C]
nI	Eig02_EA(ed)	GGI4		VE2sign_B(p)	MATS3m
nB	CATS2D_05_LL	VE2sign_B(p)		nR10	Eig06_EA(bo)
nHM	Eig02_AEA(ed)	nR10		F03[C-C]	NRS
nHet	C-016	F03[C-C]		MATS3m	RBF
nX	CATS2D_08_DL	MATS3m		Eig06_EA(bo)	CATS2D_04_DA
H%	SpMax_H2	Eig06_EA(bo)		NRS	P_VSA_ppp_D
C%	IDE	NRS		nCconj	MATS1m
N%	PW5	nCconj		RBF	CATS2D_09_DL
O%	SpDiam_H2	RBF		CATS2D_04_DA	GATS1e
X%	SdsCH	CATS2D_04_DA		P_VSA_ppp_D	CENT
nCsp3	GATS2m	P_VSA_ppp_D		MATS1m	N-072
nCsp2	minssNH	MATS1m		CATS2D_09_DL	MaxssssC
nCsp	TI2_L	CATS2D_09_DL		GATS1e	F02[N-O]
Fsp3	SpMAD_AEA(bo)	GATS1e		CENT	SpMax1_Bh(i)
max_conj_path	C-006	CENT		N-072	SHED_DD
nStructures	piPC08	N-072		MaxssssC	JGI4
totalcharge	CATS2D_04_AA	MaxssssC		F02[N-O]	ChiA_B(e)
nCIC	NdsCH	F02[N-O]		SpMax1_Bh(i)	GATS7m
nCIR	MaxdsCH	SpMax1_Bh(i)		P_VSA_m_4	MATS1i
TRS	F03[C-S]	P_VSA_m_4		SHED_DD	SpMAD_EA(ri)
Rperim	piPC10	SHED_DD		CATS2D_07_AL
Rbrid	SM10_AEA(bo)	CATS2D_07_AL		JGI4
MCD	Eig02_EA	JGI4		ChiA_B(e)
RFD	GATS4m	ChiA_B(e)		GATS7m
RCI	mindsCH	GATS7m		MATS1i
NRS	Eig02_AEA(ri)	MATS1i		SpMAD_EA(ri)
NNRS	SpMax_A	SpMAD_EA(ri)
nSpiro	B04[C-S]
nBridgeHead	B05[C-S]
nR03	SpDiam_A
nR04	F05[C-S]
nR05	max_conj_path
nR06	MATS4e
nR07	F06[C-S]
nR08	T(O..S)
nR09	ChiA_D/Dt
nR10	GGI4
nR11	ChiA_H2
nR12	MeanDD
nBnz	VE2sign_B(p)
ARR	MaxssNH
AP	SM14_EA(ri)
D/Dtr03	SM13_EA(ri)
D/Dtr04	SM12_EA(ri)
D/Dtr05	Eig02_EA(ri)
D/Dtr06	SM15_EA(ri)
D/Dtr07	SM11_EA(ri)
D/Dtr08	SpMAD_EA(ed)
D/Dtr09	MPC06
D/Dtr10	SM10_EA(ri)
D/Dtr11	B06[C-S]
D/Dtr12	SssNH
Pol	piPC07
LPRS	Chi_D
MSD	nR10
SPI	SpMAD_L
ECC	F03[C-C]
AECC	Eig02_AEA(bo)
DECC	F02[C-C]
MDDD	MATS3m
UNIP	SM09_EA(ri)
CENT	piPC06
VAR	SpMAD_AEA(ed)
ICR	MPC08
MaxTD	F04[C-C]
MeanTD	Eig06_EA(bo)
MaxDD	NRS
MeanDD	D/Dtr10
Wap	MPC09
S1K	AECC
S2K	MWC10
S3K	SM08_EA(ri)
PHI	B01[C-S]
PW2	WiA_D
PW3	MPC05
PW4	F02[C-S]
PW5	MSD
MAXDN	nCconj
MAXDP	AVS_D/Dt
DELS	MPC07
TIE	F04[C-S]
BAC	TWC
LOC	RBF
MWC01	SM07_EA(ri)
MWC02	VE1sign_B(p)
MWC03	CATS2D_04_DA
MWC04	MWC09
MWC05	P_VSA_ppp_D
MWC06	nS
MWC07	SpPosA_X
MWC08	SpMAD_X
MWC09	MATS1m
MWC10	piID
SRW02	Eig01_EA(ri)
SRW03	SpMax_EA(ri)
SRW04	F01[C-S]
SRW05	SpDiam_EA(ri)
SRW06	CATS2D_09_DL
SRW07	GATS1e
SRW08	SpDiam_L
SRW09	CENT
SRW10	N-072
MPC01	MaxssssC
MPC02	SAdon
MPC03	piPC05
MPC04	F02[N-O]
MPC05	SpMax1_Bh(i)
MPC06	SM06_EA(ri)
MPC07	B02[C-S]
MPC08	SssssC
MPC09	piPC04
MPC10	P_VSA_m_4
piPC01	B07[C-S]
piPC02	PW4
piPC03	SHED_DD
piPC04	NssNH
piPC05	F06[C-C]
piPC06	CATS2D_07_AL
piPC07	AVS_X
piPC08	SM6_H2
piPC09	MWC08
piPC10	Chi_Dz(e)
TWC	JGI4
TPC	F07[C-S]
piID	ChiA_B(e)
PCR	MPC04
PCD	T(N..S)
CID	GATS7m
BID	SpMax_D/Dt
ISIZ	EE_D/Dt
IAC	SM6_D/Dt
AAC	MATS1i
IDE	SM5_D/Dt
IDM	SpMAD_EA(ri)
IDDE	Eig06_AEA(bo)
IDDM
IDET
IDMT
IVDE
IVDM
HVcpx
HDcpx
Uindex
Vindex
Xindex
Yindex
IC0
IC1
IC2
IC3
IC4
IC5
TIC0
TIC1
TIC2
TIC3
TIC4
TIC5
SIC0
SIC1
SIC2
SIC3
SIC4
SIC5
CIC0
CIC1
CIC2
CIC3
CIC4
CIC5
BIC0
BIC1
BIC2
BIC3
BIC4
BIC5
J_A
SpPos_A
SpPosA_A
SpPosLog_A
SpMax_A
SpMaxA_A
SpDiam_A
SpAD_A
SpMAD_A
Ho_A
EE_A
Wi_D
WiA_D
AVS_D
H_D
Chi_D
ChiA_D
J_D
HyWi_D
SpPos_D
SpPosA_D
SpPosLog_D
SpMax_D
SpMaxA_D
SpDiam_D
SpAD_D
SpMAD_D
Ho_D
SM2_D
SM3_D
SM4_D
SM5_D
SM6_D
Acon
QW_L
TI1_L
TI2_L
STN_L
SpPos_L
SpPosA_L
SpPosLog_L
SpMax_L
SpMaxA_L
SpDiam_L
SpAD_L
SpMAD_L
Ho_L
EE_L
SM2_L
SM3_L
SM4_L
SM5_L
SM6_L
AVS_X
H_X
Chi_X
ChiA_X
J_X
HyWi_X
SpPos_X
SpPosA_X
SpPosLog_X
SpMax_X
SpMaxA_X
SpDiam_X
SpAD_X
SpMAD_X
Ho_X
EE_X
SM2_X
SM3_X
SM4_X
SM5_X
SM6_X
Wi_H2
WiA_H2
AVS_H2
Chi_H2
ChiA_H2
J_H2
HyWi_H2
SpPos_H2
SpPosA_H2
SpPosLog_H2
SpMax_H2
SpMaxA_H2
SpDiam_H2
SpAD_H2
SpMAD_H2
Ho_H2
EE_H2
SM2_H2
SM3_H2
SM4_H2
SM5_H2
SM6_H2
Wi_Dt
WiA_Dt
AVS_Dt
H_Dt
Chi_Dt
ChiA_Dt
J_Dt
HyWi_Dt
SpPos_Dt
SpPosA_Dt
SpPosLog_Dt
SpMax_Dt
SpMaxA_Dt
SpDiam_Dt
SpAD_Dt
SpMAD_Dt
Ho_Dt
SM2_Dt
SM3_Dt
SM4_Dt
SM5_Dt
SM6_Dt
Wi_D/Dt
WiA_D/Dt
AVS_D/Dt
H_D/Dt
Chi_D/Dt
ChiA_D/Dt
J_D/Dt
HyWi_D/Dt
SpPos_D/Dt
SpPosA_D/Dt
SpPosLog_D/Dt
SpMax_D/Dt
SpMaxA_D/Dt
SpDiam_D/Dt
SpAD_D/Dt
SpMAD_D/Dt
Ho_D/Dt
EE_D/Dt
SM2_D/Dt
SM3_D/Dt
SM4_D/Dt
SM5_D/Dt
SM6_D/Dt
Wi_Dz(Z)
WiA_Dz(Z)
AVS_Dz(Z)
H_Dz(Z)
Chi_Dz(Z)
ChiA_Dz(Z)
J_Dz(Z)
HyWi_Dz(Z)
SpAbs_Dz(Z)
SpPos_Dz(Z)
SpPosA_Dz(Z)
SpPosLog_Dz(Z)
SpMax_Dz(Z)
SpMaxA_Dz(Z)
SpDiam_Dz(Z)
SpAD_Dz(Z)
SpMAD_Dz(Z)
Ho_Dz(Z)
SM1_Dz(Z)
SM2_Dz(Z)
SM3_Dz(Z)
SM4_Dz(Z)
SM5_Dz(Z)
SM6_Dz(Z)
Wi_Dz(m)
WiA_Dz(m)
AVS_Dz(m)
H_Dz(m)
Chi_Dz(m)
ChiA_Dz(m)
J_Dz(m)
HyWi_Dz(m)
SpAbs_Dz(m)
SpPos_Dz(m)
SpPosA_Dz(m)
SpPosLog_Dz(m)
SpMax_Dz(m)
SpMaxA_Dz(m)
SpDiam_Dz(m)
SpAD_Dz(m)
SpMAD_Dz(m)
Ho_Dz(m)
SM1_Dz(m)
SM2_Dz(m)
SM3_Dz(m)
SM4_Dz(m)
SM5_Dz(m)
SM6_Dz(m)
Wi_Dz(e)
WiA_Dz(e)
AVS_Dz(e)
H_Dz(e)
Chi_Dz(e)
ChiA_Dz(e)
J_Dz(e)
HyWi_Dz(e)
SpAbs_Dz(e)
SpPos_Dz(e)
SpPosA_Dz(e)
SpPosLog_Dz(e)
SpMax_Dz(e)
SpMaxA_Dz(e)
SpDiam_Dz(e)
SpAD_Dz(e)
SpMAD_Dz(e)
Ho_Dz(e)
SM1_Dz(e)
SM2_Dz(e)
SM3_Dz(e)
SM4_Dz(e)
SM5_Dz(e)
SM6_Dz(e)
Wi_Dz(p)
WiA_Dz(p)
AVS_Dz(p)
H_Dz(p)
Chi_Dz(p)
ChiA_Dz(p)
J_Dz(p)
HyWi_Dz(p)
SpAbs_Dz(p)
SpPos_Dz(p)
SpPosA_Dz(p)
SpPosLog_Dz(p)
SpMax_Dz(p)
SpMaxA_Dz(p)
SpDiam_Dz(p)
SpAD_Dz(p)
SpMAD_Dz(p)
Ho_Dz(p)
SM1_Dz(p)
SM2_Dz(p)
SM3_Dz(p)
SM4_Dz(p)
SM5_Dz(p)
SM6_Dz(p)
Wi_Dz(i)
WiA_Dz(i)
AVS_Dz(i)
H_Dz(i)
Chi_Dz(i)
ChiA_Dz(i)
J_Dz(i)
HyWi_Dz(i)
SpAbs_Dz(i)
SpPos_Dz(i)
SpPosA_Dz(i)
SpPosLog_Dz(i)
SpMax_Dz(i)
SpMaxA_Dz(i)
SpDiam_Dz(i)
SpAD_Dz(i)
SpMAD_Dz(i)
Ho_Dz(i)
SM1_Dz(i)
SM2_Dz(i)
SM3_Dz(i)
SM4_Dz(i)
SM5_Dz(i)
SM6_Dz(i)
Wi_B(m)
WiA_B(m)
AVS_B(m)
Chi_B(m)
ChiA_B(m)
J_B(m)
HyWi_B(m)
SpAbs_B(m)
SpPos_B(m)
SpPosA_B(m)
SpPosLog_B(m)
SpMax_B(m)
SpMaxA_B(m)
SpDiam_B(m)
SpAD_B(m)
SpMAD_B(m)
Ho_B(m)
EE_B(m)
SM1_B(m)
SM2_B(m)
SM3_B(m)
SM4_B(m)
SM5_B(m)
SM6_B(m)
VE1_B(m)
VE2_B(m)
VE3_B(m)
VE1sign_B(m)
VE2sign_B(m)
VR1_B(m)
VR2_B(m)
VR3_B(m)
Wi_B(e)
WiA_B(e)
AVS_B(e)
Chi_B(e)
ChiA_B(e)
J_B(e)
HyWi_B(e)
SpAbs_B(e)
SpPos_B(e)
SpPosA_B(e)
SpPosLog_B(e)
SpMax_B(e)
SpMaxA_B(e)
SpDiam_B(e)
SpAD_B(e)
SpMAD_B(e)
Ho_B(e)
EE_B(e)
SM1_B(e)
SM2_B(e)
SM3_B(e)
SM4_B(e)
SM5_B(e)
SM6_B(e)
VE1_B(e)
VE2_B(e)
VE3_B(e)
VE1sign_B(e)
VE2sign_B(e)
VR1_B(e)
VR2_B(e)
VR3_B(e)
Wi_B(p)
WiA_B(p)
AVS_B(p)
Chi_B(p)
ChiA_B(p)
J_B(p)
HyWi_B(p)
SpAbs_B(p)
SpPos_B(p)
SpPosA_B(p)
SpPosLog_B(p)
SpMax_B(p)
SpMaxA_B(p)
SpDiam_B(p)
SpAD_B(p)
SpMAD_B(p)
Ho_B(p)
EE_B(p)
SM1_B(p)
SM2_B(p)
SM3_B(p)
SM4_B(p)
SM5_B(p)
SM6_B(p)
VE1_B(p)
VE2_B(p)
VE3_B(p)
VE1sign_B(p)
VE2sign_B(p)
VR1_B(p)
VR2_B(p)
VR3_B(p)
Wi_B(i)
WiA_B(i)
AVS_B(i)
Chi_B(i)
ChiA_B(i)
J_B(i)
HyWi_B(i)
SpAbs_B(i)
SpPos_B(i)
SpPosA_B(i)
SpPosLog_B(i)
SpMax_B(i)
SpMaxA_B(i)
SpDiam_B(i)
SpAD_B(i)
SpMAD_B(i)
Ho_B(i)
EE_B(i)
SM1_B(i)
SM2_B(i)
SM3_B(i)
SM4_B(i)
SM5_B(i)
SM6_B(i)
VE1_B(i)
VE2_B(i)
VE3_B(i)
VE1sign_B(i)
VE2sign_B(i)
VR1_B(i)
VR2_B(i)
VR3_B(i)
ATS1m
ATS2m
ATS3m
ATS4m
ATS5m
ATS6m
ATS7m
ATS8m
ATS1e
ATS2e
ATS3e
ATS4e
ATS5e
ATS6e
ATS7e
ATS8e
ATS1p
ATS2p
ATS3p
ATS4p
ATS5p
ATS6p
ATS7p
ATS8p
ATS1i
ATS2i
ATS3i
ATS4i
ATS5i
ATS6i
ATS7i
ATS8i
ATSC1m
ATSC2m
ATSC3m
ATSC4m
ATSC5m
ATSC6m
ATSC7m
ATSC8m
ATSC1e
ATSC2e
ATSC3e
ATSC4e
ATSC5e
ATSC6e
ATSC7e
ATSC8e
ATSC1p
ATSC2p
ATSC3p
ATSC4p
ATSC5p
ATSC6p
ATSC7p
ATSC8p
ATSC1i
ATSC2i
ATSC3i
ATSC4i
ATSC5i
ATSC6i
ATSC7i
ATSC8i
MATS1m
MATS2m
MATS3m
MATS4m
MATS5m
MATS6m
MATS7m
MATS8m
MATS1e
MATS2e
MATS3e
MATS4e
MATS5e
MATS6e
MATS7e
MATS8e
MATS1p
MATS2p
MATS3p
MATS4p
MATS5p
MATS6p
MATS7p
MATS8p
MATS1i
MATS2i
MATS3i
MATS4i
MATS5i
MATS6i
MATS7i
MATS8i
GATS1m
GATS2m
GATS3m
GATS4m
GATS5m
GATS6m
GATS7m
GATS8m
GATS1e
GATS2e
GATS3e
GATS4e
GATS5e
GATS6e
GATS7e
GATS8e
GATS1p
GATS2p
GATS3p
GATS4p
GATS5p
GATS6p
GATS7p
GATS8p
GATS1i
GATS2i
GATS3i
GATS4i
GATS5i
GATS6i
GATS7i
GATS8i
GGI1
GGI2
GGI3
GGI4
GGI5
GGI6
GGI7
GGI8
GGI9
GGI10
JGI1
JGI2
JGI3
JGI4
JGI5
JGI6
JGI7
JGI8
JGI9
JGI10
JGT
SpMax1_Bh(m)
SpMax2_Bh(m)
SpMax3_Bh(m)
SpMax4_Bh(m)
SpMax5_Bh(m)
SpMax6_Bh(m)
SpMax7_Bh(m)
SpMax8_Bh(m)
SpMax1_Bh(e)
SpMax2_Bh(e)
SpMax3_Bh(e)
SpMax4_Bh(e)
SpMax5_Bh(e)
SpMax6_Bh(e)
SpMax7_Bh(e)
SpMax8_Bh(e)
SpMax1_Bh(p)
SpMax2_Bh(p)
SpMax3_Bh(p)
SpMax4_Bh(p)
SpMax5_Bh(p)
SpMax6_Bh(p)
SpMax7_Bh(p)
SpMax8_Bh(p)
SpMax1_Bh(i)
SpMax2_Bh(i)
SpMax3_Bh(i)
SpMax4_Bh(i)
SpMax5_Bh(i)
SpMax6_Bh(i)
SpMax7_Bh(i)
SpMax8_Bh(i)
SpMin1_Bh(m)
SpMin2_Bh(m)
SpMin3_Bh(m)
SpMin4_Bh(m)
SpMin5_Bh(m)
SpMin6_Bh(m)
SpMin7_Bh(m)
SpMin8_Bh(m)
SpMin1_Bh(e)
SpMin2_Bh(e)
SpMin3_Bh(e)
SpMin4_Bh(e)
SpMin5_Bh(e)
SpMin6_Bh(e)
SpMin7_Bh(e)
SpMin8_Bh(e)
SpMin1_Bh(p)
SpMin2_Bh(p)
SpMin3_Bh(p)
SpMin4_Bh(p)
SpMin5_Bh(p)
SpMin6_Bh(p)
SpMin7_Bh(p)
SpMin8_Bh(p)
SpMin1_Bh(i)
SpMin2_Bh(i)
SpMin3_Bh(i)
SpMin4_Bh(i)
SpMin5_Bh(i)
SpMin6_Bh(i)
SpMin7_Bh(i)
SpMin8_Bh(i)
P_VSA_LogP_1
P_VSA_LogP_2
P_VSA_LogP_3
P_VSA_LogP_4
P_VSA_LogP_5
P_VSA_LogP_6
P_VSA_LogP_7
P_VSA_LogP_8
P_VSA_MR_1
P_VSA_MR_2
P_VSA_MR_3
P_VSA_MR_4
P_VSA_MR_5
P_VSA_MR_6
P_VSA_MR_7
P_VSA_MR_8
P_VSA_m_1
P_VSA_m_2
P_VSA_m_3
P_VSA_m_4
P_VSA_m_5
P_VSA_v_1
P_VSA_v_2
P_VSA_v_3
P_VSA_v_4
P_VSA_e_1
P_VSA_e_2
P_VSA_e_3
P_VSA_e_4
P_VSA_e_5
P_VSA_e_6
P_VSA_p_1
P_VSA_p_2
P_VSA_p_3
P_VSA_p_4
P_VSA_i_1
P_VSA_i_2
P_VSA_i_3
P_VSA_i_4
P_VSA_s_1
P_VSA_s_2
P_VSA_s_3
P_VSA_s_4
P_VSA_s_5
P_VSA_s_6
P_VSA_ppp_L
P_VSA_ppp_P
P_VSA_ppp_N
P_VSA_ppp_D
P_VSA_ppp_A
P_VSA_ppp_ar
P_VSA_ppp_con
P_VSA_ppp_hal
P_VSA_ppp_cyc
P_VSA_ppp_ter
P_VSA_charge_1
P_VSA_charge_2
P_VSA_charge_3
P_VSA_charge_4
P_VSA_charge_5
P_VSA_charge_6
P_VSA_charge_7
P_VSA_charge_8
P_VSA_charge_9
P_VSA_charge_10
P_VSA_charge_11
P_VSA_charge_12
P_VSA_charge_13
P_VSA_charge_14
Eta_alpha
Eta_alpha_A
Eta_epsi
Eta_epsi_A
Eta_betaS
Eta_betaS_A
Eta_betaP
Eta_betaP_A
Eta_beta
Eta_beta_A
Eta_C
Eta_C_A
Eta_L
Eta_L_A
Eta_R
Eta_F
Eta_F_A
Eta_LR
Eta_FL
Eta_FL_A
Eta_B
Eta_B_A
Eta_sh_p
Eta_sh_y
Eta_sh_x
Eta_D_AlphaA
Eta_D_AlphaB
Eta_epsi_2
Eta_epsi_3
Eta_epsi_4
Eta_epsi_5
Eta_D_epsiA
Eta_D_epsiB
Eta_D_epsiC
Eta_D_epsiD
Eta_psi1
Eta_D_psiA
Eta_D_psiB
Eta_D_beta
Eta_D_beta_A
SpMax_EA
SpMaxA_EA
SpDiam_EA
SpAD_EA
SpMAD_EA
SpMax_EA(ed)
SpMaxA_EA(ed)
SpDiam_EA(ed)
SpAD_EA(ed)
SpMAD_EA(ed)
SpMax_EA(bo)
SpMaxA_EA(bo)
SpDiam_EA(bo)
SpAD_EA(bo)
SpMAD_EA(bo)
SpMax_EA(dm)
SpMaxA_EA(dm)
SpDiam_EA(dm)
SpAD_EA(dm)
SpMAD_EA(dm)
SpMax_EA(ri)
SpMaxA_EA(ri)
SpDiam_EA(ri)
SpAD_EA(ri)
SpMAD_EA(ri)
SpMax_AEA(ed)
SpMaxA_AEA(ed)
SpDiam_AEA(ed)
SpAD_AEA(ed)
SpMAD_AEA(ed)
SpMax_AEA(bo)
SpMaxA_AEA(bo)
SpDiam_AEA(bo)
SpAD_AEA(bo)
SpMAD_AEA(bo)
SpMax_AEA(dm)
SpMaxA_AEA(dm)
SpDiam_AEA(dm)
SpAD_AEA(dm)
SpMAD_AEA(dm)
SpMax_AEA(ri)
SpMaxA_AEA(ri)
SpDiam_AEA(ri)
SpAD_AEA(ri)
SpMAD_AEA(ri)
Chi0_EA
Chi1_EA
Chi0_EA(ed)
Chi1_EA(ed)
Chi0_EA(bo)
Chi1_EA(bo)
Chi0_EA(dm)
Chi1_EA(dm)
Chi0_EA(ri)
Chi1_EA(ri)
Chi0_AEA(ed)
Chi1_AEA(ed)
Chi0_AEA(bo)
Chi1_AEA(bo)
Chi0_AEA(dm)
Chi1_AEA(dm)
Chi0_AEA(ri)
Chi1_AEA(ri)
SM02_EA
SM03_EA
SM04_EA
SM05_EA
SM06_EA
SM07_EA
SM08_EA
SM09_EA
SM10_EA
SM11_EA
SM12_EA
SM13_EA
SM14_EA
SM15_EA
SM02_EA(ed)
SM03_EA(ed)
SM04_EA(ed)
SM05_EA(ed)
SM06_EA(ed)
SM07_EA(ed)
SM08_EA(ed)
SM09_EA(ed)
SM10_EA(ed)
SM11_EA(ed)
SM12_EA(ed)
SM13_EA(ed)
SM14_EA(ed)
SM15_EA(ed)
SM02_EA(bo)
SM03_EA(bo)
SM04_EA(bo)
SM05_EA(bo)
SM06_EA(bo)
SM07_EA(bo)
SM08_EA(bo)
SM09_EA(bo)
SM10_EA(bo)
SM11_EA(bo)
SM12_EA(bo)
SM13_EA(bo)
SM14_EA(bo)
SM15_EA(bo)
SM02_EA(dm)
SM03_EA(dm)
SM04_EA(dm)
SM05_EA(dm)
SM06_EA(dm)
SM07_EA(dm)
SM08_EA(dm)
SM09_EA(dm)
SM10_EA(dm)
SM11_EA(dm)
SM12_EA(dm)
SM13_EA(dm)
SM14_EA(dm)
SM15_EA(dm)
SM02_EA(ri)
SM03_EA(ri)
SM04_EA(ri)
SM05_EA(ri)
SM06_EA(ri)
SM07_EA(ri)
SM08_EA(ri)
SM09_EA(ri)
SM10_EA(ri)
SM11_EA(ri)
SM12_EA(ri)
SM13_EA(ri)
SM14_EA(ri)
SM15_EA(ri)
SM02_AEA(ed)
SM03_AEA(ed)
SM04_AEA(ed)
SM05_AEA(ed)
SM06_AEA(ed)
SM07_AEA(ed)
SM08_AEA(ed)
SM09_AEA(ed)
SM10_AEA(ed)
SM11_AEA(ed)
SM12_AEA(ed)
SM13_AEA(ed)
SM14_AEA(ed)
SM15_AEA(ed)
SM02_AEA(bo)
SM03_AEA(bo)
SM04_AEA(bo)
SM05_AEA(bo)
SM06_AEA(bo)
SM07_AEA(bo)
SM08_AEA(bo)
SM09_AEA(bo)
SM10_AEA(bo)
SM11_AEA(bo)
SM12_AEA(bo)
SM13_AEA(bo)
SM14_AEA(bo)
SM15_AEA(bo)
SM02_AEA(dm)
SM03_AEA(dm)
SM04_AEA(dm)
SM05_AEA(dm)
SM06_AEA(dm)
SM07_AEA(dm)
SM08_AEA(dm)
SM09_AEA(dm)
SM10_AEA(dm)
SM11_AEA(dm)
SM12_AEA(dm)
SM13_AEA(dm)
SM14_AEA(dm)
SM15_AEA(dm)
SM02_AEA(ri)
SM03_AEA(ri)
SM04_AEA(ri)
SM05_AEA(ri)
SM06_AEA(ri)
SM07_AEA(ri)
SM08_AEA(ri)
SM09_AEA(ri)
SM10_AEA(ri)
SM11_AEA(ri)
SM12_AEA(ri)
SM13_AEA(ri)
SM14_AEA(ri)
SM15_AEA(ri)
Eig01_EA
Eig02_EA
Eig03_EA
Eig04_EA
Eig05_EA
Eig06_EA
Eig07_EA
Eig08_EA
Eig09_EA
Eig10_EA
Eig11_EA
Eig12_EA
Eig13_EA
Eig14_EA
Eig15_EA
Eig01_EA(ed)
Eig02_EA(ed)
Eig03_EA(ed)
Eig04_EA(ed)
Eig05_EA(ed)
Eig06_EA(ed)
Eig07_EA(ed)
Eig08_EA(ed)
Eig09_EA(ed)
Eig10_EA(ed)
Eig11_EA(ed)
Eig12_EA(ed)
Eig13_EA(ed)
Eig14_EA(ed)
Eig15_EA(ed)
Eig01_EA(bo)
Eig02_EA(bo)
Eig03_EA(bo)
Eig04_EA(bo)
Eig05_EA(bo)
Eig06_EA(bo)
Eig07_EA(bo)
Eig08_EA(bo)
Eig09_EA(bo)
Eig10_EA(bo)
Eig11_EA(bo)
Eig12_EA(bo)
Eig13_EA(bo)
Eig14_EA(bo)
Eig15_EA(bo)
Eig01_EA(dm)
Eig02_EA(dm)
Eig03_EA(dm)
Eig04_EA(dm)
Eig05_EA(dm)
Eig06_EA(dm)
Eig07_EA(dm)
Eig08_EA(dm)
Eig09_EA(dm)
Eig10_EA(dm)
Eig11_EA(dm)
Eig12_EA(dm)
Eig13_EA(dm)
Eig14_EA(dm)
Eig15_EA(dm)
Eig01_EA(ri)
Eig02_EA(ri)
Eig03_EA(ri)
Eig04_EA(ri)
Eig05_EA(ri)
Eig06_EA(ri)
Eig07_EA(ri)
Eig08_EA(ri)
Eig09_EA(ri)
Eig10_EA(ri)
Eig11_EA(ri)
Eig12_EA(ri)
Eig13_EA(ri)
Eig14_EA(ri)
Eig15_EA(ri)
Eig01_AEA(ed)
Eig02_AEA(ed)
Eig03_AEA(ed)
Eig04_AEA(ed)
Eig05_AEA(ed)
Eig06_AEA(ed)
Eig07_AEA(ed)
Eig08_AEA(ed)
Eig09_AEA(ed)
Eig10_AEA(ed)
Eig11_AEA(ed)
Eig12_AEA(ed)
Eig13_AEA(ed)
Eig14_AEA(ed)
Eig15_AEA(ed)
Eig01_AEA(bo)
Eig02_AEA(bo)
Eig03_AEA(bo)
Eig04_AEA(bo)
Eig05_AEA(bo)
Eig06_AEA(bo)
Eig07_AEA(bo)
Eig08_AEA(bo)
Eig09_AEA(bo)
Eig10_AEA(bo)
Eig11_AEA(bo)
Eig12_AEA(bo)
Eig13_AEA(bo)
Eig14_AEA(bo)
Eig15_AEA(bo)
Eig01_AEA(dm)
Eig02_AEA(dm)
Eig03_AEA(dm)
Eig04_AEA(dm)
Eig05_AEA(dm)
Eig06_AEA(dm)
Eig07_AEA(dm)
Eig08_AEA(dm)
Eig09_AEA(dm)
Eig10_AEA(dm)
Eig11_AEA(dm)
Eig12_AEA(dm)
Eig13_AEA(dm)
Eig14_AEA(dm)
Eig15_AEA(dm)
Eig01_AEA(ri)
Eig02_AEA(ri)
Eig03_AEA(ri)
Eig04_AEA(ri)
Eig05_AEA(ri)
Eig06_AEA(ri)
Eig07_AEA(ri)
Eig08_AEA(ri)
Eig09_AEA(ri)
Eig10_AEA(ri)
Eig11_AEA(ri)
Eig12_AEA(ri)
Eig13_AEA(ri)
Eig14_AEA(ri)
Eig15_AEA(ri)
nCp
nCs
nCt
nCq
nCrs
nCrt
nCrq
nCar
nCbH
nCb-
nCconj
nR=Cp
nR=Cs
nR=Ct
n=C=
nR#CH/X
nR#C-
nROCN
nArOCN
nRNCO
nArNCO
nRSCN
nArSCN
nRNCS
nArNCS
nRCOOH
nArCOOH
nRCOOR
nArCOOR
nRCONH2
nArCONH2
nRCONHR
nArCONHR
nRCONR2
nArCONR2
nROCON
nArOCON
nRCOX
nArCOX
nRCSOH
nArCSOH
nRCSSH
nArCSSH
nRCOSR
nArCOSR
nRCSSR
nArCSSR
nRCHO
nArCHO
nRCO
nArCO
nCONN
nC=O(O)2
nN=C-N<
nC(=N)N2
nRC=N
nArC=N
nRCNO
nArCNO
nRNH2
nArNH2
nRNHR
nArNHR
nRNR2
nArNR2
nN-N
nN=N
nRCN
nArCN
nN+
nNq
nRNHO
nArNHO
nRNNOx
nArNNOx
nRNO
nArNO
nRNO2
nArNO2
nN(CO)2
nC=N-N<
nROH
nArOH
nOHp
nOHs
nOHt
nROR
nArOR
nROX
nArOX
nO(C=O)2
nH2O
nSH
nC=S
nRSR
nRSSR
nSO
nS(=O)2
nSOH
nSOOH
nSO2OH
nSO3OH
nSO2
nSO3
nSO4
nSO2N
nPO3
nPO4
nPR3
nP(=O)O2R
nP(=O)R3/nPR5
nCH2RX
nCHR2X
nCR3X
nR=CHX
nR=CRX
nR#CX
nCHRX2
nCR2X2
nR=CX2
nCRX3
nArX
nCXr
nCXr=
nCconjX
nAziridines
nOxiranes
nThiranes
nAzetidines
nOxetanes
nThioethanes
nBeta-Lactams
nPyrrolidines
nOxolanes
ntH-Thiophenes
nPyrroles
nPyrazoles
nImidazoles
nFuranes
nThiophenes
nOxazoles
nIsoxazoles
nThiazoles
nIsothiazoles
nTriazoles
nPyridines
nPyridazines
nPyrimidines
nPyrazines
n135-Triazines
n124-Triazines
nHDon
nHAcc
C-001
C-002
C-003
C-004
C-005
C-006
C-007
C-008
C-009
C-010
C-011
C-012
C-013
C-014
C-015
C-016
C-017
C-018
C-019
C-020
C-021
C-022
C-023
C-024
C-025
C-026
C-027
C-028
C-029
C-030
C-031
C-032
C-033
C-034
C-035
C-036
C-037
C-038
C-039
C-040
C-041
C-042
C-043
C-044
H-046
H-047
H-048
H-049
H-050
H-051
H-052
H-053
H-054
H-055
O-056
O-057
O-058
O-059
O-060
O-061
O-062
O-063
Se-064
Se-065
N-066
N-067
N-068
N-069
N-070
N-071
N-072
N-073
N-074
N-075
N-076
N-077
N-078
N-079
F-081
F-082
F-083
F-084
F-085
Cl-086
Cl-087
Cl-088
Cl-089
Cl-090
Br-091
Br-092
Br-093
Br-094
Br-095
I-096
I-097
I-098
I-099
I-100
F-101
Cl-102
Br-103
I-104
S-106
S-107
S-108
S-109
S-110
Si-111
B-112
P-115
P-116
P-117
P-118
P-119
P-120
SsCH3
SdCH2
SssCH2
StCH
SdsCH
SaaCH
SsssCH
SddC
StsC
SdssC
SaasC
SaaaC
SssssC
SsNH2
SssNH
SdNH
SsssN
SdsN
SaaN
StN
SsNH3+
SssNH2+
SdNH2+
SsssNH+
SssssN+
SddsN
SaadN
SaasN
SaaNH
SsOH
SdO
SssO
SaaO
SsPH2
SssPH
SsssP
SdsssP
SddsP
SsssssP
SsSH
SdS
SssS
SaaS
SdssS
SddssS
SssssssS
SsF
SsCl
SsBr
SsI
SsLi
SssBe
SssssBe-
SsBH2
SssBH
SsssB
SssssB-
SsGeH3
SssGeH2
SsssGeH
SssssGe
SsAsH2
SssAsH
SsssAs
SsssssAs
SdsssAs
SddsAs
SsSeH
SdSe
SssSe
SaaSe
SdssSe
SssssssSe
SddssSe
SsSnH3
SssSnH2
SsssSnH
SssssSn
SsPbH3
SssPbH2
SsssPbH
SssssPb
SsSiH3
SssSiH2
SsssSiH
SssssSi
NsCH3
NdCH2
NssCH2
NtCH
NdsCH
NaaCH
NsssCH
NddC
NtsC
NdssC
NaasC
NaaaC
NssssC
NsNH2
NssNH
NdNH
NsssN
NdsN
NaaN
NtN
NsNH3+
NssNH2+
NdNH2+
NsssNH+
NssssN+
NddsN
NaadN
NaasN
NaaNH
NsOH
NdO
NssO
NaaO
NsPH2
NssPH
NsssP
NdsssP
NddsP
NsssssP
NsSH
NdS
NssS
NaaS
NdssS
NddssS
NssssssS
NsF
NsCl
NsBr
NsI
NsLi
NssBe
NssssBe-
NsBH2
NssBH
NsssB
NssssB-
NsGeH3
NssGeH2
NsssGeH
NssssGe
NsAsH2
NssAsH
NsssAs
NsssssAs
NdsssAs
NddsAs
NsSeH
NdSe
NssSe
NaaSe
NdssSe
NssssssSe
NddssSe
NsSnH3
NssSnH2
NsssSnH
NssssSn
NsPbH3
NssPbH2
NsssPbH
NssssPb
NsSiH3
NssSiH2
NsssSiH
NssssSi
minsCH3
mindCH2
minssCH2
mintCH
mindsCH
minaaCH
minsssCH
minddC
mintsC
mindssC
minaasC
minaaaC
minssssC
minsNH2
minssNH
mindNH
minsssN
mindsN
minaaN
mintN
minsNH3+
minssNH2+
mindNH2+
minsssNH+
minssssN+
minddsN
minaadN
minaasN
minaaNH
minsOH
mindO
minssO
minaaO
minsPH2
minssPH
minsssP
mindsssP
minddsP
minsssssP
minsSH
mindS
minssS
minaaS
mindssS
minddssS
minssssssS
minsF
minsCl
minsBr
minsI
minsLi
minssBe
minssssBe-
minsBH2
minssBH
minsssB
minssssB-
minsGeH3
minssGeH2
minsssGeH
minssssGe
minsAsH2
minssAsH
minsssAs
minsssssAs
mindsssAs
minddsAs
minsSeH
mindSe
minssSe
minaaSe
mindssSe
minssssssSe
minddssSe
minsSnH3
minssSnH2
minsssSnH
minssssSn
minsPbH3
minssPbH2
minsssPbH
minssssPb
minsSiH3
minssSiH2
minsssSiH
minssssSi
gmin
MaxsCH3
MaxdCH2
MaxssCH2
MaxtCH
MaxdsCH
MaxaaCH
MaxsssCH
MaxddC
MaxtsC
MaxdssC
MaxaasC
MaxaaaC
MaxssssC
MaxsNH2
MaxssNH
MaxdNH
MaxsssN
MaxdsN
MaxaaN
MaxtN
MaxsNH3+
MaxssNH2+
MaxdNH2+
MaxsssNH+
MaxssssN+
MaxddsN
MaxaadN
MaxaasN
MaxaaNH
MaxsOH
MaxdO
MaxssO
MaxaaO
MaxsPH2
MaxssPH
MaxsssP
MaxdsssP
MaxddsP
MaxsssssP
MaxsSH
MaxdS
MaxssS
MaxaaS
MaxdssS
MaxddssS
MaxssssssS
MaxsF
MaxsCl
MaxsBr
MaxsI
MaxsLi
MaxssBe
MaxssssBe-
MaxsBH2
MaxssBH
MaxsssB
MaxssssB-
MaxsGeH3
MaxssGeH2
MaxsssGeH
MaxssssGe
MaxsAsH2
MaxssAsH
MaxsssAs
MaxsssssAs
MaxdsssAs
MaxddsAs
MaxsSeH
MaxdSe
MaxssSe
MaxaaSe
MaxdssSe
MaxssssssSe
MaxddssSe
MaxsSnH3
MaxssSnH2
MaxsssSnH
MaxssssSn
MaxsPbH3
MaxssPbH2
MaxsssPbH
MaxssssPb
MaxsSiH3
MaxssSiH2
MaxsssSiH
MaxssssSi
gmax
CATS2D_00_DD
CATS2D_01_DD
CATS2D_02_DD
CATS2D_03_DD
CATS2D_04_DD
CATS2D_05_DD
CATS2D_06_DD
CATS2D_07_DD
CATS2D_08_DD
CATS2D_09_DD
CATS2D_00_DA
CATS2D_01_DA
CATS2D_02_DA
CATS2D_03_DA
CATS2D_04_DA
CATS2D_05_DA
CATS2D_06_DA
CATS2D_07_DA
CATS2D_08_DA
CATS2D_09_DA
CATS2D_00_DP
CATS2D_01_DP
CATS2D_02_DP
CATS2D_03_DP
CATS2D_04_DP
CATS2D_05_DP
CATS2D_06_DP
CATS2D_07_DP
CATS2D_08_DP
CATS2D_09_DP
CATS2D_00_DN
CATS2D_01_DN
CATS2D_02_DN
CATS2D_03_DN
CATS2D_04_DN
CATS2D_05_DN
CATS2D_06_DN
CATS2D_07_DN
CATS2D_08_DN
CATS2D_09_DN
CATS2D_00_DL
CATS2D_01_DL
CATS2D_02_DL
CATS2D_03_DL
CATS2D_04_DL
CATS2D_05_DL
CATS2D_06_DL
CATS2D_07_DL
CATS2D_08_DL
CATS2D_09_DL
CATS2D_00_AA
CATS2D_01_AA
CATS2D_02_AA
CATS2D_03_AA
CATS2D_04_AA
CATS2D_05_AA
CATS2D_06_AA
CATS2D_07_AA
CATS2D_08_AA
CATS2D_09_AA
CATS2D_00_AP
CATS2D_01_AP
CATS2D_02_AP
CATS2D_03_AP
CATS2D_04_AP
CATS2D_05_AP
CATS2D_06_AP
CATS2D_07_AP
CATS2D_08_AP
CATS2D_09_AP
CATS2D_00_AN
CATS2D_01_AN
CATS2D_02_AN
CATS2D_03_AN
CATS2D_04_AN
CATS2D_05_AN
CATS2D_06_AN
CATS2D_07_AN
CATS2D_08_AN
CATS2D_09_AN
CATS2D_00_AL
CATS2D_01_AL
CATS2D_02_AL
CATS2D_03_AL
CATS2D_04_AL
CATS2D_05_AL
CATS2D_06_AL
CATS2D_07_AL
CATS2D_08_AL
CATS2D_09_AL
CATS2D_00_PP
CATS2D_01_PP
CATS2D_02_PP
CATS2D_03_PP
CATS2D_04_PP
CATS2D_05_PP
CATS2D_06_PP
CATS2D_07_PP
CATS2D_08_PP
CATS2D_09_PP
CATS2D_00_PN
CATS2D_01_PN
CATS2D_02_PN
CATS2D_03_PN
CATS2D_04_PN
CATS2D_05_PN
CATS2D_06_PN
CATS2D_07_PN
CATS2D_08_PN
CATS2D_09_PN
CATS2D_00_PL
CATS2D_01_PL
CATS2D_02_PL
CATS2D_03_PL
CATS2D_04_PL
CATS2D_05_PL
CATS2D_06_PL
CATS2D_07_PL
CATS2D_08_PL
CATS2D_09_PL
CATS2D_00_NN
CATS2D_01_NN
CATS2D_02_NN
CATS2D_03_NN
CATS2D_04_NN
CATS2D_05_NN
CATS2D_06_NN
CATS2D_07_NN
CATS2D_08_NN
CATS2D_09_NN
CATS2D_00_NL
CATS2D_01_NL
CATS2D_02_NL
CATS2D_03_NL
CATS2D_04_NL
CATS2D_05_NL
CATS2D_06_NL
CATS2D_07_NL
CATS2D_08_NL
CATS2D_09_NL
CATS2D_00_LL
[truncated: 1,722 more rows]

## Sheet: 4. VZV
Supplementary Data 4. The optimal combination of descriptors of each algorithm
Bioactivity dataset 1. Biological toxicology
Descriptprs-Original (n=3904)	Descriptprs-Wilcoxon (n=1422)	Descriptprs-Spearman (n=194)	Descriptprs-RFE (XGBoost, n=38)	Descriptprs-DT (n=194)	Descriptprs-LR( n=125)	Descriptprs-RF (n=5)
MW	s4_pathLength	s4_pathLength	s4_pathLength	s4_pathLength	s4_pathLength	GATS5m
AMW	maxDistfromCC	SHED_DL	SHED_DL	SHED_DL	SHED_DL	GATS8p
Sv	meanDistFromCC	mindO	phLevel3	mindO	mindO	MATS7i
Se	s4_size	TIE	minssCH2	TIE	phLevel3	nCt
Sp	s4_numRotBonds	phLevel3	F04[N-O]	phLevel3	NdssC	nRCOOR
Si	chiralMoment	NdssC	P_VSA_LogP_6	NdssC	nROR
Mv	s4_relPathLength	nROR	SM12_AEA(dm)	nROR	minssCH2
Me	s4_relSize	minssCH2	P_VSA_e_5	minssCH2	F01[C-O]
Mp	s34_size	IC5	nR=Ct	IC5	P_VSA_LogP_6
Mi	SHED_DL	F05[C-O]	VE1sign_B(p)	F05[C-O]	MATS4e
GD	nLevel10	F01[C-O]	VE2sign_Dt	F01[C-O]	F06[O-O]
nAT	mindO	F04[N-O]	SpMaxA_EA(dm)	F04[N-O]	nCs
nSK	s4_relPathLength_2	P_VSA_LogP_6	CATS2D_07_LL	P_VSA_LogP_6	MaxsOH
nAA	s34_relSize	SM12_AEA(dm)	NssCH2	SM12_AEA(dm)	P_VSA_charge_1
nTA	nLevel8	SHED_DA	MaxdssC	SHED_DA	nR=Ct
nBT	nLevel9	P_VSA_e_5	CATS2D_07_DL	P_VSA_e_5	F02[N-O]
nBO	TIE	MATS4e	F03[C-N]	MATS4e	mindssC
nBM	SPI	SAscore	LOC	SAscore	VE1sign_B(p)
SCBO	nLevel7	F06[O-O]	CATS2D_07_DA	F06[O-O]	MATS6e
RBN	phLevel3	nCs	CATS2D_02_AL	nCs	ARR
RBF	NdssC	MaxsOH	D/Dtr09	MaxsOH	VE2sign_Dt
nDB	nROR	P_VSA_charge_1	Eig03_EA(dm)	P_VSA_charge_1	CATS2D_09_DL
nTB	s3_relPathLength_2	nR=Ct	gmin	nR=Ct	CATS2D_07_LL
nAB	minssCH2	F02[N-O]	s3_numAroBonds	F02[N-O]	NssCH2
nH	IC5	mindssC	CATS2D_02_DL	mindssC	MaxdssC
nC	F05[C-O]	CATS2D_06_AA	P_VSA_charge_12	CATS2D_06_AA	CATS2D_04_LL
nN	phLevel1	CATS2D_08_AA	F10[N-O]	CATS2D_08_AA	CATS2D_07_DL
nO	MaxdO	VE1sign_B(p)	nCp	VE1sign_B(p)	P_VSA_LogP_3
nP	IDDE	MATS6e	GATS4m	MATS6e	F03[C-N]
nS	F01[C-O]	ARR	F02[C-N]	ARR	nOxolanes
nF	SpPosA_Dz(m)	VE2sign_Dt	MaxsCH3	VE2sign_Dt	F04[O-O]
nCL	SpMAD_Dz(m)	CATS2D_09_DL	arLevel2	CATS2D_09_DL	H-054
nBR	SpPosA_Dz(Z)	SpMaxA_EA(dm)	CATS2D_07_AP	SpMaxA_EA(dm)	CATS2D_07_DA
nI	SpMAD_Dz(Z)	CATS2D_04_AA	CATS2D_03_AA	CATS2D_04_AA	VE1_B(m)
nB	F04[N-O]	CATS2D_07_LL	F09[N-P]	CATS2D_07_LL	C-002
nHM	P_VSA_LogP_6	NssCH2	SpDiam_AEA(dm)	NssCH2	CATS2D_04_DD
nHet	SpMaxA_Dz(m)	MaxdssC	SpMax_AEA(bo)	MaxdssC	QEDu
nX	SpMaxA_Dz(Z)	CATS2D_04_LL	VE1sign_A	CATS2D_04_LL	MATS6v
H%	F07[C-O]	CATS2D_07_DL		CATS2D_07_DL	H-046
C%	IC4	minaaaC		minaaaC	D/Dtr09
N%	Eta_L	P_VSA_LogP_3		P_VSA_LogP_3	CATS2D_03_DA
O%	nLevel5	F03[C-N]		F03[C-N]	B02[N-O]
X%	GGI7	P_VSA_LogP_2		P_VSA_LogP_2	IC2
nCsp3	ChiralCenter	LOC		LOC	mindsN
nCsp2	SM12_AEA(dm)	CATS2D_08_DL		CATS2D_08_DL	Eig03_EA(dm)
nCsp	Eig03_EA(ed)	B09[O-O]		B09[O-O]	CATS2D_06_DA
Fsp3	F02[C-O]	SpPosA_D/Dt		SpPosA_D/Dt	GATS6e
max_conj_path	WiA_Dz(m)	nOxolanes		nOxolanes	C-040
nStructures	WiA_Dz(Z)	F04[O-O]		F04[O-O]	nOHs
totalcharge	nLevel3	H-054		H-054	D/Dtr05
nCIC	SHED_DA	CATS2D_07_DA		CATS2D_07_DA	gmin
nCIR	P_VSA_i_3	VE1_B(m)		VE1_B(m)	MATS4m
TRS	GGI3	C-002		C-002	C-018
Rperim	DELS	CATS2D_04_DD		CATS2D_04_DD	MaxdsCH
Rbrid	ATSC5m	QEDu		QEDu	P_VSA_charge_12
MCD	nDB	CATS2D_02_AL		CATS2D_02_AL	C-041
RFD	SpMaxA_Dz(i)	B07[O-O]		B07[O-O]	C-019
RCI	SpMAD_Dz(i)	MATS6v		MATS6v	GATS3m
NRS	SpPosA_Dz(i)	B07[N-O]		B07[N-O]	F10[N-O]
NNRS	Eta_C	Eig03_AEA(dm)		Eig03_AEA(dm)	nCp
nSpiro	P_VSA_e_5	H-046		H-046	MATS5v
nBridgeHead	Eig03_EA	D/Dtr09		D/Dtr09	CATS2D_04_AL
nR03	SM11_AEA(bo)	CATS2D_03_DA		CATS2D_03_DA	nR=Cs
nR04	MATS4e	GATS2v		GATS2v	MATS4i
nR05	SHED_AL	B02[N-O]		B02[N-O]	GATS4m
nR06	Chi_Dz(m)	s4_numAroBonds		s4_numAroBonds	BIC5
nR07	Chi_Dz(Z)	IC2		IC2	SpPosA_B(i)
nR08	C-008	mindsN		mindsN	MATS3v
nR09	SpMaxA_Dz(e)	B08[O-O]		B08[O-O]	SpMin1_Bh(p)
nR10	SpMAD_Dz(e)	MATS6m		MATS6m	C-009
nR11	SpPosA_Dz(e)	Eig03_EA(dm)		Eig03_EA(dm)	AVS_B(m)
nR12	MDDD	CATS2D_06_DA		CATS2D_06_DA	SpMax1_Bh(i)
nBnz	DECC	N%		N%	GATS6m
ARR	MaxTD	B09[C-O]		B09[C-O]	F02[C-N]
AP	VAR	J_D/Dt		J_D/Dt	P_VSA_MR_5
D/Dtr03	HVcpx	GATS6e		GATS6e	minaasC
D/Dtr04	Eig03_AEA(ri)	C-040		C-040	P_VSA_charge_2
D/Dtr05	TIC0	nOHs		nOHs	MATS5m
D/Dtr06	IAC	D/Dtr05		D/Dtr05	VE2sign_B(e)
D/Dtr07	ATS3e	P_VSA_s_3		P_VSA_s_3	B03[N-O]
D/Dtr08	IC3	gmin		gmin	CATS2D_09_AA
D/Dtr09	P_VSA_m_3	CATS2D_08_DA		CATS2D_08_DA	P_VSA_MR_2
D/Dtr10	F08[C-O]	Eig05_EA(dm)		Eig05_EA(dm)	arLevel2
D/Dtr11	gmax	s3_numAroBonds		s3_numAroBonds	Eig02_EA(dm)
D/Dtr12	Eig03_AEA(ed)	CATS2D_02_DL		CATS2D_02_DL	N-073
Pol	Eta_C_A	MATS4m		MATS4m	JGI10
LPRS	WiA_Dz(i)	C-018		C-018	CATS2D_01_AA
MSD	AECC	GATS4e		GATS4e	B01[N-N]
SPI	GGI5	MaxdsCH		MaxdsCH	P_VSA_charge_10
ECC	SpMin4_Bh(i)	P_VSA_charge_12		P_VSA_charge_12	nOHp
AECC	ICR	CATS2D_04_DL		CATS2D_04_DL	GATS7p
DECC	TIC1	C-041		C-041	C-043
MDDD	J_B(p)	C-019		C-019	CATS2D_07_AP
UNIP	ATS3i	GATS3m		GATS3m	N-072
CENT	J_B(v)	F10[N-O]		F10[N-O]	CATS2D_03_AA
VAR	nCconj	nCp		nCp	B01[C-O]
ICR	WiA_Dz(e)	MATS5v		MATS5v	MATS2p
MaxTD	SM3_Dz(m)	CATS2D_04_AL		CATS2D_04_AL	CATS2D_05_DA
MeanTD	SM3_Dz(Z)	B06[N-O]		B06[N-O]	JGI2
MaxDD	Ho_Dz(i)	MaxaaN		MaxaaN	JGI5
MeanDD	SAscore	nR=Cs		nR=Cs	CATS2D_07_AA
Wap	J_B(i)	B05[N-O]		B05[N-O]	C-005
S1K	F03[C-O]	MATS4i		MATS4i	MaxssCH2
S2K	GGI1	GATS4m		GATS4m	CATS2D_05_AA
S3K	SM5_Dz(m)	GATS3p		GATS3p	JGI3
PHI	SM5_Dz(Z)	CATS2D_06_DL		CATS2D_06_DL	F09[N-P]
PW2	SpMin4_Bh(v)	BIC5		BIC5	nPyridines
PW3	SpMax_Dz(m)	SpPosA_B(i)		SpPosA_B(i)	SpDiam_AEA(dm)
PW4	SM3_Dz(i)	CATS2D_09_DA		CATS2D_09_DA	F01[N-O]
PW5	J_B(e)	MATS3v		MATS3v	SpMax_AEA(bo)
MAXDN	SpMax_Dz(Z)	SpMin1_Bh(p)		SpMin1_Bh(p)	F04[N-S]
MAXDP	SM6_Dz(m)	C-009		C-009	O-060
DELS	SM6_Dz(Z)	MATS2v		MATS2v	B03[N-N]
TIE	SpPos_Dz(m)	AVS_B(m)		AVS_B(m)	SM11_EA(dm)
BAC	SpAD_Dz(m)	SpMax1_Bh(i)		SpMax1_Bh(i)	C-007
LOC	VE2_Dt	MCD		MCD	F07[N-P]
MWC01	SpPos_Dz(Z)	GATS6m		GATS6m	VE1sign_A
MWC02	SpAD_Dz(Z)	F02[C-N]		F02[C-N]	C-026
MWC03	J_B(m)	P_VSA_MR_5		P_VSA_MR_5	JGI7
MWC04	SpAbs_Dz(m)	minaasC		minaasC	B10[C-F]
MWC05	SM4_Dz(m)	P_VSA_charge_2		P_VSA_charge_2	P_VSA_LogP_5
MWC06	IDE	MATS5m		MATS5m	GATS5m
MWC07	SpAbs_Dz(Z)	VE2sign_B(e)		VE2sign_B(e)	GATS8p
MWC08	SM4_Dz(Z)	MaxsCH3		MaxsCH3	nCt
MWC09	AVS_Dz(m)	B03[N-O]		B03[N-O]	nRCOOR
MWC10	AVS_Dz(Z)	CATS2D_09_AA		CATS2D_09_AA
SRW02	SM2_Dz(m)	P_VSA_MR_2		P_VSA_MR_2
SRW03	SM2_Dz(Z)	arLevel2		arLevel2
SRW04	F06[O-O]	B08[C-O]		B08[C-O]
SRW05	SpMaxA_Dz(v)	MATS6p		MATS6p
SRW06	SpMin4_Bh(e)	Eig02_EA(dm)		Eig02_EA(dm)
SRW07	SM5_Dz(i)	B05[C-O]		B05[C-O]
SRW08	MAXDP	N-073		N-073
SRW09	SpPosA_Dz(v)	JGI10		JGI10
SRW10	HyWi_Dz(m)	CATS2D_01_AA		CATS2D_01_AA
MPC01	Chi_Dz(i)	MATS4v		MATS4v
MPC02	HyWi_Dz(Z)	SHED_PL		SHED_PL
MPC03	nCs	B01[N-N]		B01[N-N]
MPC04	S1K	MATS3m		MATS3m
MPC05	SpMAD_Dz(v)	P_VSA_charge_10		P_VSA_charge_10
MPC06	SpDiam_Dz(m)	H-049		H-049
MPC07	SpDiam_Dz(Z)	SRW09		SRW09
MPC08	F06[C-O]	nOHp		nOHp
MPC09	TIC3	GATS7p		GATS7p
MPC10	SpMax_Dz(i)	C-033		C-033
piPC01	TIC2	C-043		C-043
piPC02	Chi1_EA(bo)	CATS2D_07_AP		CATS2D_07_AP
piPC03	TIC5	N-072		N-072
piPC04	SM6_Dz(i)	B03[N-S]		B03[N-S]
piPC05	SM3_Dz(e)	B03[C-O]		B03[C-O]
piPC06	ATSC3m	CATS2D_03_AA		CATS2D_03_AA
piPC07	TIC4	B01[C-O]		B01[C-O]
piPC08	s2_size	MATS2p		MATS2p
piPC09	SpPos_Dz(i)	CATS2D_05_DA		CATS2D_05_DA
piPC10	Eta_epsi	JGI2		JGI2
TWC	SpAD_Dz(i)	F07[C-N]		F07[C-N]
TPC	SpAbs_Dz(i)	JGI5		JGI5
piID	VE2_H2	CATS2D_07_AA		CATS2D_07_AA
PCR	MaxsOH	C-005		C-005
PCD	SM4_Dz(i)	MaxssCH2		MaxssCH2
CID	SpPosA_Dz(p)	CATS2D_05_AA		CATS2D_05_AA
BID	J_A	JGI3		JGI3
ISIZ	s4_phSize	MATS8e		MATS8e
IAC	Ho_Dz(e)	F09[N-P]		F09[N-P]
AAC	P_VSA_charge_1	nPyridines		nPyridines
IDE	SpMAD_Dz(p)	SpDiam_AEA(dm)		SpDiam_AEA(dm)
IDM	AVS_Dz(i)	F01[N-O]		F01[N-O]
IDDE	SM5_Dz(e)	B04[N-O]		B04[N-O]
IDDM	J_X	P_VSA_charge_5		P_VSA_charge_5
IDET	SpMaxA_Dz(p)	SpMax_AEA(bo)		SpMax_AEA(bo)
IDMT	PHI	F04[N-S]		F04[N-S]
IVDE	Chi_Dz(e)	GATS2e		GATS2e
IVDM	Ho_Dz(v)	O-060		O-060
HVcpx	SM3_Dz(p)	SpMax_A		SpMax_A
HDcpx	SM2_Dz(i)	B03[N-N]		B03[N-N]
Uindex	SpMax_Dz(e)	SM11_EA(dm)		SM11_EA(dm)
Vindex	HyWi_Dz(i)	C-007		C-007
Xindex	nLevel1	F07[N-P]		F07[N-P]
Yindex	F09[C-O]	B07[C-O]		B07[C-O]
IC0	SM6_Dz(e)	MATS5i		MATS5i
IC1	SpPos_Dz(e)	VE1sign_A		VE1sign_A
IC2	SpAD_Dz(e)	C-026		C-026
IC3	SpAbs_Dz(e)	JGI7		JGI7
IC4	P_VSA_ppp_ter	minsssN		minsssN
IC5	ChiA_Dz(m)	B10[C-F]		B10[C-F]
TIC0	nO	T(N..S)		T(N..S)
TIC1	SM5_Dz(p)	MATS1v		MATS1v
TIC2	SpAbs_Dz(p)	P_VSA_LogP_5		P_VSA_LogP_5
TIC3	SM4_Dz(e)	B08[C-C]		B08[C-C]
TIC4	ChiA_Dz(Z)	GATS5m		GATS5m
TIC5	Eig06_AEA(dm)	GATS8p		GATS8p
SIC0	J_H2	MATS7i		MATS7i
SIC1	SpPosA_D	nCt		nCt
SIC2	SpMAD_D	nRCOOR		nRCOOR
SIC3	SpMaxA_EA(bo)
SIC4	s3_pathLength
SIC5	Ho_Dz(m)
CIC0	SpMaxA_D
CIC1	VE2_A
CIC2	SM3_Dz(v)
CIC3	AVS_Dz(e)
CIC4	Ho_Dz(Z)
CIC5	SpMax_Dz(p)
BIC0	SpAD_Dz(p)
BIC1	ECC
BIC2	SpPos_Dz(p)
BIC3	MW
BIC4	WiA_Dz(v)
BIC5	SpAD_D/Dt
J_A	SpPos_D/Dt
SpPos_A	AVS_D/Dt
SpPosA_A	SM2_Dz(e)
SpPosLog_A	SpDiam_Dz(i)
SpMax_A	Wi_Dz(m)
SpMaxA_A	SM6_Dz(p)
SpDiam_A	Ho_Dz(p)
SpAD_A	Wi_Dz(Z)
SpMAD_A	Uindex
Ho_A	WiA_B(p)
EE_A	HyWi_Dz(e)
VE1_A	MSD
VE2_A	SM4_Dz(p)
VE3_A	AVS_Dz(p)
VE1sign_A	WiA_B(v)
VE2sign_A	NsssCH
VR1_A	P_VSA_ppp_A
VR2_A	SM5_Dz(v)
VR3_A	Ho_D/Dt
Wi_D	ChiA_D/Dt
WiA_D	VE2_Dz(Z)
AVS_D	VE2_Dz(m)
H_D	VE2_Dz(e)
Chi_D	SM3_D/Dt
ChiA_D	Eig03_EA(ri)
J_D	SM4_D/Dt
HyWi_D	WiA_Dz(p)
SpPos_D	SpMax_D/Dt
SpPosA_D	SM6_D/Dt
SpPosLog_D	EE_D/Dt
SpMax_D	SM5_D/Dt
SpMaxA_D	SM2_Dz(p)
SpDiam_D	SpDiam_Dz(e)
SpAD_D	VE2_Dz(i)
SpMAD_D	ChiA_Dz(i)
Ho_D	chiralPhMoment
SM2_D	GGI4
SM3_D	SM1_B(m)
SM4_D	SpMax_Dz(v)
SM5_D	SM2_D/Dt
SM6_D	ATS4e
VE1_D	H_Dt
VE2_D	HyWi_Dz(p)
VE3_D	Wi_Dz(i)
VE1sign_D	ATS7m
VE2sign_D	HyWi_D/Dt
VR1_D	SpAbs_Dz(v)
VR2_D	nR=Ct
VR3_D	C-017
Acon	SM6_Dz(v)
QW_L	SpDiam_D/Dt
TI1_L	SpPos_Dz(v)
TI2_L	ATS5e
STN_L	SpAD_Dz(v)
SpPos_L	SpMin4_Bh(p)
SpPosA_L	Chi0_EA(bo)
SpPosLog_L	ATS5i
SpMax_L	Wi_D/Dt
SpMaxA_L	SpMax4_Bh(i)
SpDiam_L	WiA_D
SpAD_L	AVS_Dz(v)
SpMAD_L	SM4_Dz(v)
Ho_L	Wi_Dz(e)
EE_L	SpDiam_Dz(p)
SM2_L	MeanTD
SM3_L	VE2_Dz(v)
SM4_L	ATSC2p
SM5_L	Wi_Dz(p)
SM6_L	ChiA_Dz(e)
AVS_X	nCsp3
H_X	SpMaxA_EA(ed)
Chi_X	GGI6
ChiA_X	MDEO-12
J_X	ATSC4e
HyWi_X	WiA_B(i)
SpPos_X	HyWi_Dz(v)
SpPosA_X	SM2_Dz(v)
SpPosLog_X	SM3_D
SpMax_X	GGI9
SpMaxA_X	SM5_D
SpDiam_X	Chi_Dz(v)
SpAD_X	SpMax_D
SpMAD_X	SM04_AEA(ri)
Ho_X	Eig09_EA(ed)
EE_X	VE2_B(v)
SM2_X	ATS4i
SM3_X	SM6_D
SM4_X	Wi_Dz(v)
SM5_X	SpAD_D
SM6_X	SpPos_D
Wi_H2	Eig08_AEA(dm)
WiA_H2	ChiA_Dz(p)
AVS_H2	SpPosLog_Dz(m)
Chi_H2	SpDiam_Dz(v)
ChiA_H2	SpPosLog_Dz(Z)
J_H2	SM4_D
HyWi_H2	SpMax4_Bh(e)
SpPos_H2	AVS_D
SpPosA_H2	F02[N-O]
SpPosLog_H2	SM4_X
SpMax_H2	ATS8m
SpMaxA_H2	Se
SpDiam_H2	SpDiam_D
SpAD_H2	SM2_D
SpMAD_H2	S2K
Ho_H2	HyWi_D
EE_H2	SpMaxA_B(i)
SM2_H2	SpMaxA_B(v)
SM3_H2	nLevel6
SM4_H2	Ho_D
SM5_H2	ATS2e
SM6_H2	WiA_B(e)
VE1_H2	VE3_B(m)
VE2_H2	ChiA_Dz(v)
VE3_H2	Chi0_EA(dm)
VE1sign_H2	Chi_B(p)
VE2sign_H2	VE2_B(p)
VR1_H2	ATS1e
VR2_H2	ATS1m
VR3_H2	SpMaxA_B(e)
Wi_Dt	ATSC1p
WiA_Dt	SpPosLog_Dz(i)
AVS_Dt	SpPosLog_D/Dt
H_Dt	Wi_D
Chi_Dt	SpPosLog_Dz(p)
ChiA_Dt	SM1_B(e)
J_Dt	VE2_Dz(p)
HyWi_Dt	SpPosLog_Dz(e)
SpPos_Dt	UNIP
SpPosA_Dt	VE2_D
SpPosLog_Dt	IDMT
SpMax_Dt	SpPosLog_Dz(v)
SpMaxA_Dt	P_VSA_s_6
SpDiam_Dt	SM6_X
SpAD_Dt	s3_size
SpMAD_Dt	Chi_B(v)
Ho_Dt	SpMaxA_L
SM2_Dt	Chi_D
SM3_Dt	Eig09_AEA(ed)
SM4_Dt	B06[O-O]
SM5_Dt	SpMaxA_AEA(ed)
SM6_Dt	SM2_X
VE1_Dt	Si
VE2_Dt	SpMax4_Bh(p)
VE3_Dt	Chi_B(i)
VE1sign_Dt	ChiA_D
VE2sign_Dt	GD
VR1_Dt	ISIZ
VR2_Dt	nAT
VR3_Dt	T(O..O)
Wi_D/Dt	WiA_H2
WiA_D/Dt	SpMaxA_AEA(dm)
AVS_D/Dt	ATS4m
H_D/Dt	mindssC
Chi_D/Dt	SpMax4_Bh(v)
ChiA_D/Dt	Ho_X
J_D/Dt	Eta_R
HyWi_D/Dt	S3K
SpPos_D/Dt	SpPosLog_D
SpPosA_D/Dt	SpPos_B(m)
SpPosLog_D/Dt	LPRS
SpMax_D/Dt	ATSC3p
SpMaxA_D/Dt	ATS6m
SpDiam_D/Dt	ATSC4m
SpAD_D/Dt	Chi_B(e)
SpMAD_D/Dt	MDEO-11
Ho_D/Dt	H-048
EE_D/Dt	Eta_B
SM2_D/Dt	Sv
SM3_D/Dt	CATS2D_06_AA
SM4_D/Dt	BAC
SM5_D/Dt	Eig07_AEA(dm)
SM6_D/Dt	CENT
Wi_Dz(Z)	ATS1i
WiA_Dz(Z)	ATSC3v
AVS_Dz(Z)	VE3_B(e)
H_Dz(Z)	EE_X
Chi_Dz(Z)	Chi_B(m)
ChiA_Dz(Z)	CATS2D_08_AA
J_Dz(Z)	VE1sign_B(p)
HyWi_Dz(Z)	IDET
SpAbs_Dz(Z)	VvdwMG
SpPos_Dz(Z)	Vx
SpPosA_Dz(Z)	ATS2i
SpPosLog_Dz(Z)	WiA_B(m)
SpMax_Dz(Z)	MATS6e
SpMaxA_Dz(Z)	nBT
SpDiam_Dz(Z)	Chi_Dz(p)
SpAD_Dz(Z)	SpPosLog_B(m)
SpMAD_Dz(Z)	QW_L
Ho_Dz(Z)	minsOH
SM1_Dz(Z)	GGI8
SM2_Dz(Z)	SM1_B(i)
SM3_Dz(Z)	ATS5m
SM4_Dz(Z)	ATSC5v
SM5_Dz(Z)	HyWi_X
SM6_Dz(Z)	SpMaxA_AEA(bo)
VE1_Dz(Z)	HDcpx
VE2_Dz(Z)	ATS2m
VE3_Dz(Z)	VE3_B(i)
VE1sign_Dz(Z)	ATSC2m
VE2sign_Dz(Z)	ARR
VR1_Dz(Z)	SpMaxA_X
VR2_Dz(Z)	nSK
VR3_Dz(Z)	SpMaxA_B(p)
Wi_Dz(m)	VE2sign_Dt
WiA_Dz(m)	P_VSA_p_2
AVS_Dz(m)	VR3_Dz(i)
H_Dz(m)	nLevel2
Chi_Dz(m)	VR3_Dz(Z)
ChiA_Dz(m)	VR3_Dz(m)
J_Dz(m)	VR3_Dz(e)
HyWi_Dz(m)	VR3_D
SpAbs_Dz(m)	Eta_D_beta
SpPos_Dz(m)	Eig11_AEA(dm)
SpPosA_Dz(m)	Eig09_AEA(dm)
SpPosLog_Dz(m)	Sp
SpMax_Dz(m)	VR3_Dz(v)
SpMaxA_Dz(m)	SpPosLog_X
SpDiam_Dz(m)	VR3_Dz(p)
SpAD_Dz(m)	VR3_Dt
SpMAD_Dz(m)	ATSC4v
Ho_Dz(m)	Eta_betaS
SM1_Dz(m)	VR3_B(v)
SM2_Dz(m)	IDM
SM3_Dz(m)	VR3_B(p)
SM4_Dz(m)	SpPosLog_B(e)
SM5_Dz(m)	ATSC6m
SM6_Dz(m)	ATS1v
VE1_Dz(m)	VR3_B(i)
VE2_Dz(m)	VR3_H2
VE3_Dz(m)	SpPos_X
VE1sign_Dz(m)	Chi_H2
VE2sign_Dz(m)	SpAD_X
VR1_Dz(m)	VR3_B(e)
VR2_Dz(m)	VR3_A
VR3_Dz(m)	Chi0_EA(ed)
Wi_Dz(v)	VE3_Dz(p)
WiA_Dz(v)	BID
AVS_Dz(v)	VR3_B(m)
H_Dz(v)	VR1_Dz(e)
Chi_Dz(v)	VR1_Dz(i)
ChiA_Dz(v)	ATSC5p
J_Dz(v)	Eig09_EA
HyWi_Dz(v)	SM03_AEA(dm)
SpAbs_Dz(v)	Eta_LR
SpPos_Dz(v)	SpPos_B(e)
SpPosA_Dz(v)	SpPosLog_L
SpPosLog_Dz(v)	VR1_Dz(m)
SpMax_Dz(v)	VR1_Dz(Z)
SpMaxA_Dz(v)	VR1_D
SpDiam_Dz(v)	SpAD_L
SpAD_Dz(v)	VR1_Dt
SpMAD_Dz(v)	Eig10_AEA(ed)
Ho_Dz(v)	VE3_D
SM1_Dz(v)	SpPosLog_Dt
SM2_Dz(v)	SpMaxA_EA
SM3_Dz(v)	SpPosLog_B(i)
SM4_Dz(v)	VR1_Dz(v)
SM5_Dz(v)	Eig10_AEA(dm)
SM6_Dz(v)	F03[O-O]
VE1_Dz(v)	SpAbs_B(m)
VE2_Dz(v)	SpMaxA_A
VE3_Dz(v)	SpMaxA_AEA(ri)
VE1sign_Dz(v)	IVDM
VE2sign_Dz(v)	Chi0_AEA(dm)
VR1_Dz(v)	Chi0_AEA(bo)
VR2_Dz(v)	Chi0_AEA(ri)
VR3_Dz(v)	Chi0_AEA(ed)
Wi_Dz(e)	Chi0_EA
WiA_Dz(e)	ATS2v
AVS_Dz(e)	VR1_Dz(p)
H_Dz(e)	SpPosLog_B(p)
Chi_Dz(e)	SpPosLog_H2
ChiA_Dz(e)	VE3_Dz(v)
J_Dz(e)	Wi_B(m)
HyWi_Dz(e)	Chi0_EA(ri)
SpAbs_Dz(e)	Ho_B(m)
SpPos_Dz(e)	SpPosLog_A
SpPosA_Dz(e)	VE3_Dz(Z)
SpPosLog_Dz(e)	VE3_Dz(m)
SpMax_Dz(e)	nH
SpMaxA_Dz(e)	SpMin6_Bh(p)
SpDiam_Dz(e)	EE_A
SpAD_Dz(e)	VE3_Dz(i)
SpMAD_Dz(e)	Ho_H2
Ho_Dz(e)	SM1_B(v)
SM1_Dz(e)	VE3_Dz(e)
SM2_Dz(e)	Eta_alpha
SM3_Dz(e)	SM15_AEA(bo)
SM4_Dz(e)	Eig07_EA
SM5_Dz(e)	ATS4v
SM6_Dz(e)	CID
VE1_Dz(e)	ATS5v
VE2_Dz(e)	GGI10
VE3_Dz(e)	ATSC8e
VE1sign_Dz(e)	SpPosLog_B(v)
VE2sign_Dz(e)	VR1_B(v)
VR1_Dz(e)	HyWi_B(m)
VR2_Dz(e)	ATSC2v
VR3_Dz(e)	VR1_H2
Wi_Dz(p)	VR1_B(p)
WiA_Dz(p)	VR1_A
AVS_Dz(p)	SpPos_H2
H_Dz(p)	SpAD_H2
Chi_Dz(p)	SpMax6_Bh(m)
ChiA_Dz(p)	CATS2D_09_DL
J_Dz(p)	Ho_B(e)
HyWi_Dz(p)	Chi1_EA(ed)
SpAbs_Dz(p)	H_D
SpPos_Dz(p)	SpMaxA_H2
SpPosA_Dz(p)	SpMaxA_EA(dm)
SpPosLog_Dz(p)	Eig10_EA(ri)
SpMax_Dz(p)	ATS3v
SpMaxA_Dz(p)	Eig10_AEA(ri)
SpDiam_Dz(p)	SAacc
SpAD_Dz(p)	ATSC4p
SpMAD_Dz(p)	ATSC1m
Ho_Dz(p)	IDDM
SM1_Dz(p)	Ho_L
SM2_Dz(p)	CATS2D_04_AA
SM3_Dz(p)	SpAD_AEA(ed)
SM4_Dz(p)	SpPos_B(i)
SM5_Dz(p)	ATSC7m
SM6_Dz(p)	SpMax7_Bh(m)
VE1_Dz(p)	ATS1p
VE2_Dz(p)	VR1_B(i)
VE3_Dz(p)	VR1_B(e)
VE1sign_Dz(p)	s34_phSize
VE2sign_Dz(p)	ATS6e
VR1_Dz(p)	CATS2D_07_LL
VR2_Dz(p)	SM04_AEA(dm)
VR3_Dz(p)	Eig10_EA
Wi_Dz(i)	SpMin3_Bh(i)
WiA_Dz(i)	SpMax6_Bh(e)
AVS_Dz(i)	AP
H_Dz(i)	s2_pathLength
Chi_Dz(i)	Ho_B(i)
ChiA_Dz(i)	SM4_L
J_Dz(i)	P_VSA_v_2
HyWi_Dz(i)	F04[C-O]
SpAbs_Dz(i)	Pol
SpPos_Dz(i)	Eig12_EA
SpPosA_Dz(i)	SM06_AEA(dm)
SpPosLog_Dz(i)	Eig09_AEA(ri)
SpMax_Dz(i)	SpMin3_Bh(e)
SpMaxA_Dz(i)	Eig11_AEA(ri)
SpDiam_Dz(i)	VR1_B(m)
SpAD_Dz(i)	SpMin4_Bh(m)
SpMAD_Dz(i)	SpMaxA_EA(ri)
Ho_Dz(i)	Eig14_AEA(dm)
SM1_Dz(i)	Eig08_EA(ed)
SM2_Dz(i)	SM03_AEA(ri)
SM3_Dz(i)	VE3_Dt
SM4_Dz(i)	Eig08_AEA(ed)
SM5_Dz(i)	Eig09_EA(ri)
SM6_Dz(i)	SM5_L
VE1_Dz(i)	MWC01
VE2_Dz(i)	MPC01
VE3_Dz(i)	SRW02
VE1sign_Dz(i)	nBO
VE2sign_Dz(i)	s2_relPathLength_2
VR1_Dz(i)	SpPos_L
VR2_Dz(i)	ATS2p
VR3_Dz(i)	Wi_B(e)
Wi_B(m)	Eig06_EA(ri)
WiA_B(m)	Chi1_EA(ri)
AVS_B(m)	Eig12_EA(ed)
Chi_B(m)	SM07_AEA(ri)
ChiA_B(m)	Eig07_AEA(ri)
J_B(m)	EE_H2
HyWi_B(m)	Wi_H2
SpAbs_B(m)	SM3_L
SpPos_B(m)	Ho_A
SpPosA_B(m)	NssCH2
SpPosLog_B(m)	Eig07_EA(ri)
SpMax_B(m)	ATSC8m
SpMaxA_B(m)	SpAbs_B(e)
SpDiam_B(m)	SpMin3_Bh(m)
SpAD_B(m)	Eig06_AEA(ri)
SpMAD_B(m)	SpAD_A
Ho_B(m)	SpPos_A
EE_B(m)	SRW04
SM1_B(m)	HyWi_H2
SM2_B(m)	SM2_H2
SM3_B(m)	Eig04_AEA(ed)
SM4_B(m)	Wi_Dt
SM5_B(m)	Eig06_EA
SM6_B(m)	SM14_AEA(bo)
VE1_B(m)	SM08_AEA(ri)
VE2_B(m)	Eig13_EA(ed)
VE3_B(m)	Chi_X
VE1sign_B(m)	HyWi_B(e)
VE2sign_B(m)	SM1_B(p)
VR1_B(m)	Eig11_EA
VR2_B(m)	SM05_AEA(dm)
VR3_B(m)	EE_L
Wi_B(v)	MaxdssC
WiA_B(v)	SpPos_B(v)
AVS_B(v)	SM2_L
Chi_B(v)	SM02_EA
ChiA_B(v)	MWC02
J_B(v)	SpAbs_B(i)
HyWi_B(v)	Eig12_AEA(dm)
SpAbs_B(v)	MPC02
SpPos_B(v)	SpMin3_Bh(v)
SpPosA_B(v)	ATS6i
SpPosLog_B(v)	Eig12_AEA(ed)
SpMax_B(v)	SM02_AEA(ed)
SpMaxA_B(v)	Chi1_AEA(ed)
SpDiam_B(v)	Chi1_AEA(bo)
SpAD_B(v)	Chi1_AEA(dm)
SpMAD_B(v)	Chi1_EA
Ho_B(v)	Chi1_AEA(ri)
EE_B(v)	Eig15_AEA(ri)
SM1_B(v)	SM06_AEA(ri)
SM2_B(v)	Eig11_EA(ed)
SM3_B(v)	ATS5p
SM4_B(v)	MPC10
SM5_B(v)	Wi_B(i)
SM6_B(v)	CATS2D_04_LL
VE1_B(v)	Eig15_AEA(dm)
VE2_B(v)	ringChiralCenter
VE3_B(v)	SM13_AEA(dm)
VE1sign_B(v)	Eig04_EA(ed)
VE2sign_B(v)	Eig11_EA(ri)
VR1_B(v)	ATSC8p
VR2_B(v)	Eig11_AEA(ed)
VR3_B(v)	SpAD_AEA(bo)
Wi_B(e)	ATS7v
WiA_B(e)	Eig15_EA(bo)
AVS_B(e)	ATS6v
Chi_B(e)	CATS2D_07_DL
ChiA_B(e)	SM3_H2
J_B(e)	Eig13_AEA(dm)
HyWi_B(e)	ATS8e
SpAbs_B(e)	SpAD_AEA(dm)
SpPos_B(e)	SM03_EA
SpPosA_B(e)	SpMin6_Bh(v)
SpPosLog_B(e)	SM6_L
SpMax_B(e)	SpMin6_Bh(i)
SpMaxA_B(e)	H_X
SpDiam_B(e)	SpPos_B(p)
SpAD_B(e)	ATSC6v
SpMAD_B(e)	P_VSA_MR_1
Ho_B(e)	SpAD_EA(ed)
EE_B(e)	ATS3m
SM1_B(e)	SpMax6_Bh(i)
SM2_B(e)	VE1_D
SM3_B(e)	SpMax3_Bh(p)
SM4_B(e)	Eig12_AEA(ri)
SM5_B(e)	Eig13_EA(bo)
SM6_B(e)	VE1_Dz(p)
VE1_B(e)	ATSC6p
VE2_B(e)	SsOH
VE3_B(e)	nTA
VE1sign_B(e)	Eig07_EA(ed)
VE2sign_B(e)	SM02_AEA(ri)
VR1_B(e)	ATS4p
VR2_B(e)	Eig15_AEA(ed)
VR3_B(e)	ATSC1v
Wi_B(p)	MWC04
WiA_B(p)	Eig13_EA
AVS_B(p)	SM07_AEA(dm)
Chi_B(p)	SpMin5_Bh(i)
ChiA_B(p)	Eig12_EA(ri)
J_B(p)	Ho_B(v)
HyWi_B(p)	SM4_H2
SpAbs_B(p)	SsssCH
SpPos_B(p)	SpMin7_Bh(i)
SpPosA_B(p)	SpAbs_B(v)
SpPosLog_B(p)	SpMax3_Bh(v)
SpMax_B(p)	SpAD_EA
SpMaxA_B(p)	MWC03
SpDiam_B(p)	ATSC6e
SpAD_B(p)	Eig13_AEA(ri)
SpMAD_B(p)	O-059
Ho_B(p)	SpMax6_Bh(v)
EE_B(p)	SpMax7_Bh(e)
SM1_B(p)	SpAD_AEA(ri)
SM2_B(p)	Wi_B(v)
SM3_B(p)	SM05_AEA(ri)
SM4_B(p)	Eig10_EA(ed)
SM5_B(p)	SpAbs_B(p)
SM6_B(p)	Eig05_AEA(dm)
VE1_B(p)	ATS8v
VE2_B(p)	SM2_B(m)
VE3_B(p)	Eig08_EA
VE1sign_B(p)	SM02_AEA(dm)
VE2sign_B(p)	Eig13_EA(ri)
VR1_B(p)	SpMax3_Bh(e)
VR2_B(p)	Eig15_AEA(bo)
VR3_B(p)	SpMin5_Bh(e)
Wi_B(i)	SM02_EA(ri)
WiA_B(i)	HyWi_B(i)
AVS_B(i)	SRW06
Chi_B(i)	ATS3p
ChiA_B(i)	Eig13_AEA(bo)
J_B(i)	Eig15_EA
HyWi_B(i)	SM09_AEA(dm)
SpAbs_B(i)	minaaaC
SpPos_B(i)	ATSC3i
SpPosA_B(i)	SpMin3_Bh(p)
SpPosLog_B(i)	Eig14_AEA(ri)
SpMax_B(i)	Eig14_EA(bo)
SpMaxA_B(i)	AVS_Dt
SpDiam_B(i)	Ho_B(p)
SpAD_B(i)	SpAD_EA(ri)
SpMAD_B(i)	Wi_B(p)
Ho_B(i)	SpAD_B(m)
EE_B(i)	SpMin6_Bh(e)
SM1_B(i)	SpAD_B(p)
SM2_B(i)	MR99
SM3_B(i)	MRcons
SM4_B(i)	Eig13_AEA(ed)
SM5_B(i)	ChiA_Dt
SM6_B(i)	SM08_AEA(dm)
VE1_B(i)	Eig14_EA
VE2_B(i)	SM03_AEA(ed)
VE3_B(i)	VE3_H2
VE1sign_B(i)	SM10_AEA(ri)
VE2sign_B(i)	Eig15_EA(ed)
VR1_B(i)	P_VSA_LogP_3
VR2_B(i)	Eig03_AEA(bo)
VR3_B(i)	MPC09
ATS1m	ATS7e
ATS2m	SpMAD_EA(bo)
ATS3m	SM3_Dt
ATS4m	HyWi_Dt
ATS5m	VE1_Dz(v)
ATS6m	Eig12_EA(bo)
ATS7m	F05[C-C]
ATS8m	SM5_Dt
ATS1v	SpMax_Dt
ATS2v	SM6_Dt
ATS3v	ATS8p
ATS4v	SM4_Dt
ATS5v	SM2_Dt
ATS6v	Eig14_EA(ri)
ATS7v	F10[C-O]
ATS8v	SAdon
ATS1e	VE3_B(p)
ATS2e	Eig07_AEA(ed)
ATS3e	SpPos_Dt
ATS4e	SpAD_Dt
ATS5e	ATS6p
ATS6e	MWC05
ATS7e	ATS7p
ATS8e	Eig15_EA(ri)
ATS1p	SM03_EA(ri)
ATS2p	VE3_A
ATS3p	SM04_EA
ATS4p	SpMax8_Bh(m)
ATS5p	SdO
ATS6p	F03[C-N]
ATS7p	SM09_AEA(ri)
ATS8p	Eig14_EA(ed)
ATS1i	HyWi_B(v)
ATS2i	Eig08_AEA(ri)
ATS3i	SpMax8_Bh(e)
ATS4i	SpMin5_Bh(v)
ATS5i	Eig08_EA(ri)
ATS6i	P_VSA_LogP_2
ATS7i	MaxaaaC
ATS8i	SpMin5_Bh(p)
ATSC1m	P_VSA_MR_3
ATSC2m	Eig14_AEA(bo)
ATSC3m	SM5_H2
ATSC4m	CATS2D_05_LL
ATSC5m	SM2_B(e)
ATSC6m	SpMax7_Bh(v)
ATSC7m	P_VSA_ppp_D
ATSC8m	VE3_B(v)
ATSC1v	SpMin7_Bh(e)
ATSC2v	CIC0
ATSC3v	HyWi_B(p)
ATSC4v	VE2_B(i)
ATSC5v	ATSC1i
ATSC6v	SpDiam_Dt
ATSC7v	VE1_Dz(i)
ATSC8v	ATS8i
ATSC1e	SpAD_B(v)
ATSC2e	SpMin8_Bh(p)
ATSC3e	SpMax7_Bh(i)
ATSC4e	LOC
ATSC5e	Chi1_EA(dm)
ATSC6e	s2_phSize
ATSC7e	CATS2D_06_LL
ATSC8e	F07[C-C]
ATSC1p	TPC
ATSC2p	CATS2D_08_DL
ATSC3p	ATSC4i
ATSC4p	MPC03
ATSC5p	B09[O-O]
ATSC6p	ATSC8v
ATSC7p	MWC06
ATSC8p	VE1_Dz(e)
ATSC1i	SpMax3_Bh(i)
ATSC2i	SssO
ATSC3i	SpMax5_Bh(e)
ATSC4i	Eig14_AEA(ed)
ATSC5i	Eig04_AEA(bo)
ATSC6i	Eig11_EA(bo)
ATSC7i	ATSC5i
ATSC8i	SpMax5_Bh(v)
MATS1m	SM6_H2
MATS2m	SM02_EA(ed)
MATS3m	SpAD_B(e)
MATS4m	SpAD_B(i)
MATS5m	RBN
MATS6m	SpMin8_Bh(m)
MATS7m	SpPosA_D/Dt
MATS8m	SpMAD_D/Dt
MATS1v	SpMin7_Bh(p)
MATS2v	TPSA(NO)
MATS3v	MPC06
MATS4v	VE1_Dz(Z)
MATS5v	Wap
MATS6v	nC
MATS7v	s2_relSize
MATS8v	H_Dz(e)
MATS1e	VE1_Dz(m)
MATS2e	SHED_LL
MATS3e	MPC04
MATS4e	VE2_B(e)
MATS5e	nOxolanes
MATS6e	F04[O-O]
MATS7e	SpMax5_Bh(p)
MATS8e	SRW08
MATS1p	H_Dz(m)
MATS2p	SM2_B(i)
MATS3p	H-054
MATS4p	Eta_beta_A
MATS5p	CATS2D_07_DA
MATS6p	Ho_Dt
MATS7p	MPC08
MATS8p	H_Dz(Z)
MATS1i	SM04_EA(ri)
MATS2i	ATS7i
MATS3i	SM3_B(e)
MATS4i	Eta_FL_A
MATS5i	MaxDD
MATS6i	SpMax6_Bh(p)
MATS7i	SpMax5_Bh(m)
MATS8i	Acon
GATS1m	SpMax7_Bh(p)
GATS2m	NssO
GATS3m	H_D/Dt
GATS4m	CATS2D_08_LL
GATS5m	CATS2D_00_AA
GATS6m	CATS2D_04_DA
GATS7m	Eig11_AEA(bo)
GATS8m	ATSC7p
GATS1v	SpMax5_Bh(i)
GATS2v	SpMin7_Bh(m)
GATS3v	Eig05_AEA(ed)
GATS4v	B03[O-O]
GATS5v	SM02_AEA(bo)
GATS6v	EE_B(e)
GATS7v	SM1_Dz(e)
GATS8v	SM2_B(v)
GATS1e	VE1_B(m)
GATS2e	SM2_B(p)
GATS3e	MPC07
GATS4e	MWC07
GATS5e	SpMin7_Bh(v)
GATS6e	SpMax8_Bh(i)
GATS7e	C-002
GATS8e	F02[C-C]
GATS1p	SpMin8_Bh(v)
GATS2p	F04[C-C]
GATS3p	CATS2D_04_DD
GATS4p	SpMaxA_B(m)
GATS5p	SpMax8_Bh(v)
GATS6p	Eig12_AEA(bo)
GATS7p	nLevel4
GATS8p	SHED_AA
GATS1i	CATS2D_02_AA
GATS2i	MPC05
GATS3i	H_Dz(i)
GATS4i	Eig05_EA(ed)
GATS5i	SM14_AEA(dm)
GATS6i	SpMin6_Bh(m)
GATS7i	s2_phRelSize_2
GATS8i	MWC08
GGI1	QEDu
GGI2	H_Dz(v)
GGI3	Eig06_EA(ed)
GGI4	SM15_AEA(dm)
GGI5	SM1_Dz(p)
GGI6	ATSC3e
GGI7	O-058
GGI8	VE1_Dt
GGI9	CATS2D_02_AL
GGI10	ATSC2i
JGI1	B07[O-O]
JGI2	SM04_AEA(ed)
JGI3	SM3_B(p)
JGI4	EE_B(p)
JGI5	MATS6v
JGI6	B07[N-O]
JGI7	Eig03_AEA(dm)
JGI8	SM3_B(m)
JGI9	H-046
JGI10	SpMin5_Bh(m)
JGT	D/Dtr09
SpMax1_Bh(m)	SpMax8_Bh(p)
SpMax2_Bh(m)	F01[C-C]
SpMax3_Bh(m)	Eig05_EA(ri)
SpMax4_Bh(m)	ATSC7v
SpMax5_Bh(m)	CATS2D_03_DA
SpMax6_Bh(m)	VE2_B(m)
SpMax7_Bh(m)	SM3_B(v)
SpMax8_Bh(m)	Eig10_AEA(bo)
SpMax1_Bh(v)	Eig04_EA(ri)
SpMax2_Bh(v)	GATS2v
SpMax3_Bh(v)	Eig05_AEA(ri)
SpMax4_Bh(v)	B02[N-O]
SpMax5_Bh(v)	P_VSA_v_1
SpMax6_Bh(v)	P_VSA_m_1
SpMax7_Bh(v)	SpMaxA_D/Dt
SpMax8_Bh(v)	SM3_B(i)
SpMax1_Bh(e)	Eig04_AEA(ri)
SpMax2_Bh(e)	VE1sign_Dt
SpMax3_Bh(e)	Eig09_AEA(bo)
SpMax4_Bh(e)	s4_numAroBonds
SpMax5_Bh(e)	Eig10_EA(bo)
SpMax6_Bh(e)	P_VSA_p_1
SpMax7_Bh(e)	EE_B(v)
SpMax8_Bh(e)	Eig06_AEA(ed)
SpMax1_Bh(p)	TWC
SpMax2_Bh(p)	P_VSA_e_1
SpMax3_Bh(p)	MWC09
SpMax4_Bh(p)	SHED_DD
SpMax5_Bh(p)	IC2
SpMax6_Bh(p)	SaaaC
SpMax7_Bh(p)	P_VSA_s_2
SpMax8_Bh(p)	EE_B(i)
SpMax1_Bh(i)	EE_B(m)
SpMax2_Bh(i)	SM1_Dz(Z)
SpMax3_Bh(i)	mindsN
SpMax4_Bh(i)	Eta_L_A
SpMax5_Bh(i)	F06[C-C]
SpMax6_Bh(i)	Eig08_AEA(bo)
SpMax7_Bh(i)	Eig09_EA(bo)
SpMax8_Bh(i)	Eta_betaP_A
SpMin1_Bh(m)	SM1_Dz(m)
SpMin2_Bh(m)	MDEO-22
SpMin3_Bh(m)	Eig06_AEA(bo)
SpMin4_Bh(m)	B08[O-O]
SpMin5_Bh(m)	F09[O-O]
SpMin6_Bh(m)	Eig04_EA
SpMin7_Bh(m)	SM12_AEA(bo)
SpMin8_Bh(m)	MaxdsN
SpMin1_Bh(v)	VE1_B(i)
SpMin2_Bh(v)	SM13_AEA(bo)
SpMin3_Bh(v)	Eig05_EA
SpMin4_Bh(v)	nHAcc
SpMin5_Bh(v)	MWC10
SpMin6_Bh(v)	F08[C-C]
SpMin7_Bh(v)	SM03_AEA(bo)
SpMin8_Bh(v)	s2_relPathLength
SpMin1_Bh(e)	SRW10
SpMin2_Bh(e)	MATS6m
SpMin3_Bh(e)	SpMin8_Bh(i)
SpMin4_Bh(e)	s3_relPathLength
SpMin5_Bh(e)	VE1_B(e)
SpMin6_Bh(e)	Eig03_EA(dm)
SpMin7_Bh(e)	SpMax_H2
SpMin8_Bh(e)	ATSC8i
SpMin1_Bh(p)	CATS2D_06_DA
SpMin2_Bh(p)	piPC01
SpMin3_Bh(p)	SCBO
SpMin4_Bh(p)	ATSC7i
SpMin5_Bh(p)	WiA_D/Dt
SpMin6_Bh(p)	Eig05_AEA(bo)
SpMin7_Bh(p)	CATS2D_08_AL
SpMin8_Bh(p)	TPSA(Tot)
SpMin1_Bh(i)	nHDon
SpMin2_Bh(i)	s3_numRotBonds
SpMin3_Bh(i)	Chi_Dt
SpMin4_Bh(i)	NaaaC
SpMin5_Bh(i)	SpMin8_Bh(e)
SpMin6_Bh(i)	H-050
SpMin7_Bh(i)	MaxssO
SpMin8_Bh(i)	N%
P_VSA_LogP_1	B09[C-O]
P_VSA_LogP_2	nROH
P_VSA_LogP_3	F07[O-O]
P_VSA_LogP_4	VE1sign_B(v)
P_VSA_LogP_5	J_D/Dt
P_VSA_LogP_6	ATSC6i
P_VSA_LogP_7	ATSC7e
P_VSA_LogP_8	Chi_D/Dt
P_VSA_MR_1	SM4_B(e)
P_VSA_MR_2	s3_phRelSize_2
P_VSA_MR_3	SM04_AEA(bo)
P_VSA_MR_4	GATS6e
P_VSA_MR_5	SpMax4_Bh(m)
P_VSA_MR_6	O-056
P_VSA_MR_7	SdsN
P_VSA_MR_8	C-040
P_VSA_m_1	H_Dz(p)
P_VSA_m_2	P_VSA_LogP_7
P_VSA_m_3	s3_phSize
P_VSA_m_4	nOHs
P_VSA_m_5	D/Dtr05
P_VSA_v_1	SM05_EA
P_VSA_v_2	SpDiam_H2
P_VSA_v_3	NdsN
P_VSA_v_4	P_VSA_s_3
P_VSA_e_1	s4_phRelSize
P_VSA_e_2	minsssCH
P_VSA_e_3	gmin
P_VSA_e_4	Eig04_AEA(dm)
P_VSA_e_5	NsOH
P_VSA_e_6	CATS2D_00_DA
P_VSA_p_1	CATS2D_08_DA
P_VSA_p_2	Eig07_AEA(bo)
P_VSA_p_3	F08[O-O]
P_VSA_p_4	SM05_EA(ri)
P_VSA_i_1	F09[C-C]
P_VSA_i_2	SM05_AEA(ed)
P_VSA_i_3	CATS2D_00_DD
P_VSA_i_4	SM4_B(p)
P_VSA_s_1	Eig08_EA(bo)
P_VSA_s_2	Eig05_EA(dm)
P_VSA_s_3	Fsp3
P_VSA_s_4	AVS_B(i)
P_VSA_s_5	s3_numAroBonds
P_VSA_s_6	CATS2D_02_DL
P_VSA_ppp_L	SM06_EA(ri)
P_VSA_ppp_P	QED
P_VSA_ppp_N	SM06_EA
P_VSA_ppp_D	NdO
P_VSA_ppp_A	CATS2D_00_LL
P_VSA_ppp_ar	SpAD_EA(bo)
P_VSA_ppp_con	MATS4m
P_VSA_ppp_hal	MaxsssCH
P_VSA_ppp_cyc	CATS2D_07_AL
P_VSA_ppp_ter	C-018
P_VSA_charge_1	GATS4e
P_VSA_charge_2	SpMaxA_Dt
P_VSA_charge_3	SpPosA_Dt
P_VSA_charge_4	SpMAD_Dt
P_VSA_charge_5	Yindex
P_VSA_charge_6	MaxdsCH
P_VSA_charge_7	SM4_B(m)
P_VSA_charge_8	SM4_B(v)
P_VSA_charge_9	P_VSA_charge_12
P_VSA_charge_10	SM4_B(i)
P_VSA_charge_11	SM05_AEA(bo)
P_VSA_charge_12	T(N..O)
P_VSA_charge_13	Eta_F
P_VSA_charge_14	SM5_B(e)
Eta_alpha	CATS2D_04_DL
Eta_alpha_A	s3_relSize
Eta_epsi	SM5_B(p)
Eta_epsi_A	SM1_Dz(v)
Eta_betaS	C-041
Eta_betaS_A	Vindex
Eta_betaP	Eig04_EA(dm)
Eta_betaP_A	TI2_L
Eta_beta	mindsCH
Eta_beta_A	SdsCH
Eta_C	GATS6v
Eta_C_A	F10[C-C]
Eta_L	C-019
Eta_L_A	MeanDD
Eta_R	GGI2
Eta_F	GATS3m
Eta_F_A	WiA_Dt
Eta_LR	F10[N-O]
Eta_FL	nCp
Eta_FL_A	P_VSA_charge_8
Eta_B	MATS5v
Eta_B_A	Eta_D_beta_A
Eta_sh_p	CATS2D_01_LL
Eta_sh_y	J_Dz(Z)
Eta_sh_x	J_Dz(m)
Eta_D_AlphaA	CATS2D_04_AL
Eta_D_AlphaB	SpMax3_Bh(m)
Eta_epsi_2	B06[N-O]
Eta_epsi_3	phLevel2
Eta_epsi_4	MaxaaN
Eta_epsi_5	nR=Cs
Eta_D_epsiA	B05[N-O]
Eta_D_epsiB	SM5_B(v)
Eta_D_epsiC	Xindex
Eta_D_epsiD	minaaN
Eta_psi1	MATS4i
Eta_D_psiA	SM5_B(m)
Eta_D_psiB	SpMAD_B(i)
Eta_D_beta	nHet
Eta_D_beta_A	MAXDN
SpMax_EA	SpMAD_B(e)
SpMaxA_EA	CATS2D_09_LL
SpDiam_EA	nCrs
SpAD_EA	ATSC5e
SpMAD_EA	GATS4m
SpMax_EA(ed)	SM06_AEA(bo)
SpMaxA_EA(ed)	Eig07_EA(bo)
SpDiam_EA(ed)	GATS3p
SpAD_EA(ed)	s2_phRelSize
SpMAD_EA(ed)	CATS2D_06_DL
SpMax_EA(bo)	BIC5
SpMaxA_EA(bo)	SpPosA_B(i)
SpDiam_EA(bo)	SM06_AEA(ed)
SpAD_EA(bo)	PCR
SpMAD_EA(bo)	CATS2D_09_DA
SpMax_EA(dm)	MATS3v
SpMaxA_EA(dm)	CIC1
SpDiam_EA(dm)	J_Dz(i)
SpAD_EA(dm)	AVS_B(e)
SpMAD_EA(dm)	SM6_B(p)
SpMax_EA(ri)	SaaN
SpMaxA_EA(ri)	SpMin1_Bh(p)
SpDiam_EA(ri)	NdsCH
SpAD_EA(ri)	C-009
SpMAD_EA(ri)	MATS2v
SpMax_AEA(ed)	SM07_EA(ri)
SpMaxA_AEA(ed)	SM5_B(i)
SpDiam_AEA(ed)	AVS_B(m)
SpAD_AEA(ed)	CATS2D_03_LL
SpMAD_AEA(ed)	SIC0
SpMax_AEA(bo)	Eig06_EA(bo)
SpMaxA_AEA(bo)	B10[N-O]
SpDiam_AEA(bo)	SpMax1_Bh(i)
SpAD_AEA(bo)	F10[C-N]
SpMAD_AEA(bo)	J_Dz(e)
SpMax_AEA(dm)	s34_phRelSize
SpMaxA_AEA(dm)	MCD
SpDiam_AEA(dm)	TI1_L
SpAD_AEA(dm)	B10[C-O]
SpMAD_AEA(dm)	N-075
SpMax_AEA(ri)	Hy
SpMaxA_AEA(ri)	B04[O-O]
SpDiam_AEA(ri)	Eig04_EA(bo)
SpAD_AEA(ri)	SM14_AEA(ri)
SpMAD_AEA(ri)	GATS6m
Chi0_EA	SM07_EA
Chi1_EA	F02[C-N]
Chi0_EA(ed)	SM08_EA(ri)
Chi1_EA(ed)	P_VSA_MR_5
Chi0_EA(bo)	SM6_B(m)
Chi1_EA(bo)	minaasC
Chi0_EA(dm)	SM6_B(e)
Chi1_EA(dm)	SpMAD_B(v)
Chi0_EA(ri)	P_VSA_charge_2
Chi1_EA(ri)	P_VSA_ppp_ar
Chi0_AEA(ed)	MATS5m
Chi1_AEA(ed)	VE2sign_B(e)
Chi0_AEA(bo)	NaaN
Chi1_AEA(bo)	CATS2D_09_AL
Chi0_AEA(dm)	MaxsCH3
Chi1_AEA(dm)	Eig02_AEA(ri)
Chi0_AEA(ri)	B03[N-O]
Chi1_AEA(ri)	F03[C-C]
SM02_EA	SM10_AEA(bo)
SM03_EA	Eig02_EA
SM04_EA	minssO
SM05_EA	J_Dz(p)
SM06_EA	CATS2D_09_AA
SM07_EA	P_VSA_MR_2
SM08_EA	ChiA_B(i)
SM09_EA	GATS3v
SM10_EA	N-074
SM11_EA	SM03_EA(ed)
SM12_EA	arLevel2
SM13_EA	SM6_B(v)
SM14_EA	B08[C-O]
SM15_EA	Mv
SM02_EA(ed)	MATS6p
SM03_EA(ed)	SpMAD_B(p)
SM04_EA(ed)	ATSC2e
SM05_EA(ed)	ChiA_B(m)
SM06_EA(ed)	SM07_AEA(bo)
SM07_EA(ed)	minaaCH
SM08_EA(ed)	SM15_AEA(ri)
SM09_EA(ed)	Eig05_EA(bo)
SM10_EA(ed)	SM08_EA
SM11_EA(ed)	Eig02_EA(dm)
SM12_EA(ed)	B05[C-O]
SM13_EA(ed)	SpMAD_B(m)
SM14_EA(ed)	VE2sign_B(m)
SM15_EA(ed)	SM07_AEA(ed)
SM02_EA(bo)	Eig02_EA(ri)
SM03_EA(bo)	N-073
SM04_EA(bo)	BIC0
SM05_EA(bo)	J_Dz(v)
SM06_EA(bo)	D/Dtr06
SM07_EA(bo)	SM09_EA(ri)
SM08_EA(bo)	s4_phRelSize_2
SM09_EA(bo)	BIC4
SM10_EA(bo)	F07[N-O]
SM11_EA(bo)	JGI10
SM12_EA(bo)	nAB
SM13_EA(bo)	CATS2D_01_AA
SM14_EA(bo)	ChiA_B(p)
SM15_EA(bo)	B10[C-N]
SM02_EA(dm)	MATS4v
SM03_EA(dm)	SM1_Dz(i)
SM04_EA(dm)	SM04_EA(ed)
SM05_EA(dm)	SHED_PL
SM06_EA(dm)	ChiA_B(v)
SM07_EA(dm)	B01[N-N]
SM08_EA(dm)	minsCH3
SM09_EA(dm)	MATS3m
SM10_EA(dm)	P_VSA_charge_10
SM11_EA(dm)	SpAD_EA(dm)
SM12_EA(dm)	SM02_EA(bo)
SM13_EA(dm)	piPC02
SM14_EA(dm)	GATS4v
SM15_EA(dm)	nAA
SM02_EA(ri)	SM10_EA(ri)
SM03_EA(ri)	H-049
SM04_EA(ri)	CATS2D_02_LL
SM05_EA(ri)	AVS_B(v)
SM06_EA(ri)	SM6_B(i)
SM07_EA(ri)	ChiA_B(e)
SM08_EA(ri)	F01[N-N]
SM09_EA(ri)	H%
SM10_EA(ri)	Eig02_EA(ed)
SM11_EA(ri)	SM11_AEA(dm)
SM12_EA(ri)	nR09
SM13_EA(ri)	GATS1m
SM14_EA(ri)	GATS5v
SM15_EA(ri)	SRW09
SM02_AEA(ed)	MATS3p
SM03_AEA(ed)	nOHp
SM04_AEA(ed)	SpMax1_Bh(e)
SM05_AEA(ed)	SM08_AEA(bo)
SM06_AEA(ed)	VE2sign_B(p)
SM07_AEA(ed)	GATS7p
SM08_AEA(ed)	Eta_beta
SM09_AEA(ed)	SRW07
SM10_AEA(ed)	C-033
SM11_AEA(ed)	C-043
SM12_AEA(ed)	O%
SM13_AEA(ed)	SM11_EA(ri)
SM14_AEA(ed)	CATS2D_07_AP
SM15_AEA(ed)	F03[N-O]
SM02_AEA(bo)	SM08_AEA(ed)
SM03_AEA(bo)	SM09_EA
SM04_AEA(bo)	AVS_B(p)
SM05_AEA(bo)	F08[N-O]
SM06_AEA(bo)	C-028
SM07_AEA(bo)	Mp
SM08_AEA(bo)	RBF
SM09_AEA(bo)	CATS2D_05_AL
SM10_AEA(bo)	N-072
SM11_AEA(bo)	SIC1
SM12_AEA(bo)	B03[N-S]
SM13_AEA(bo)	B03[C-O]
SM14_AEA(bo)	F03[N-S]
SM15_AEA(bo)	SM12_EA(ri)
SM02_AEA(dm)	arLevel3
SM03_AEA(dm)	MATS1e
SM04_AEA(dm)	C-016
SM05_AEA(dm)	CATS2D_03_AA
SM06_AEA(dm)	B01[C-O]
SM07_AEA(dm)	J_D
SM08_AEA(dm)	MATS2p
SM09_AEA(dm)	CATS2D_05_DA
SM10_AEA(dm)	JGI2
SM11_AEA(dm)	s3_phRelSize
SM12_AEA(dm)	SpPosA_B(e)
SM13_AEA(dm)	F07[C-N]
SM14_AEA(dm)	Eig02_AEA(ed)
SM15_AEA(dm)	JGI5
SM02_AEA(ri)	GATS1v
SM03_AEA(ri)	SpDiam_EA(bo)
SM04_AEA(ri)	SM11_AEA(ri)
SM05_AEA(ri)	SpMax_EA(bo)
SM06_AEA(ri)	Eig01_EA(bo)
SM07_AEA(ri)	CATS2D_07_AA
SM08_AEA(ri)	SM14_EA(bo)
SM09_AEA(ri)	nR05
SM10_AEA(ri)	C-005
SM11_AEA(ri)	SpPosA_B(v)
SM12_AEA(ri)	MaxssCH2
SM13_AEA(ri)	SM10_EA
SM14_AEA(ri)	SM12_EA(bo)
SM15_AEA(ri)	SHED_AP
Eig01_EA	MATS4p
Eig02_EA	VE2sign_B(i)
Eig03_EA	CATS2D_05_AA
Eig04_EA	JGI3
Eig05_EA	SM13_EA(bo)
Eig06_EA	SM15_EA(bo)
Eig07_EA	SM03_EA(bo)
Eig08_EA	MDEC-12
Eig09_EA	SsNH2
Eig10_EA	CIC2
Eig11_EA	MATS8e
Eig12_EA	P_VSA_charge_9
Eig13_EA	SM13_EA(ri)
Eig14_EA	F09[N-P]
Eig15_EA	nPyridines
Eig01_EA(ed)	SHED_DP
Eig02_EA(ed)	SpDiam_AEA(dm)
Eig03_EA(ed)	F01[N-O]
Eig04_EA(ed)	SpDiam_B(i)
Eig05_EA(ed)	B04[N-O]
Eig06_EA(ed)	B01[N-O]
Eig07_EA(ed)	P_VSA_charge_5
Eig08_EA(ed)	CATS2D_06_AL
Eig09_EA(ed)	SM11_EA(bo)
Eig10_EA(ed)	nCar
Eig11_EA(ed)	B06[C-O]
Eig12_EA(ed)	SpMax_AEA(bo)
Eig13_EA(ed)	Eig01_AEA(bo)
Eig14_EA(ed)	Eig01_AEA(dm)
Eig15_EA(ed)	SpMax_AEA(dm)
Eig01_EA(bo)	C-027
Eig02_EA(bo)	AVS_H2
Eig03_EA(bo)	F04[N-S]
Eig04_EA(bo)	SM10_EA(bo)
Eig05_EA(bo)	Eig03_EA(bo)
Eig06_EA(bo)	SM13_AEA(ri)
Eig07_EA(bo)	F06[N-O]
Eig08_EA(bo)	Rperim
Eig09_EA(bo)	B04[N-S]
Eig10_EA(bo)	MaxssS
Eig11_EA(bo)	minssS
Eig12_EA(bo)	SssS
Eig13_EA(bo)	GATS2e
Eig14_EA(bo)	SM14_EA(ri)
Eig15_EA(bo)	O-060
Eig01_EA(dm)	SpMax_A
Eig02_EA(dm)	MDEN-12
Eig03_EA(dm)	Eta_D_epsiB
Eig04_EA(dm)	P_VSA_charge_6
Eig05_EA(dm)	B04[C-O]
Eig06_EA(dm)	GATS4i
Eig07_EA(dm)	SM09_AEA(ed)
Eig08_EA(dm)	SaaCH
Eig09_EA(dm)	B03[N-N]
Eig10_EA(dm)	SpMax1_Bh(v)
Eig11_EA(dm)	GATS2p
Eig12_EA(dm)	B09[N-P]
Eig13_EA(dm)	SM11_EA
Eig14_EA(dm)	SM15_EA(ri)
Eig15_EA(dm)	nRSR
Eig01_EA(ri)	NssS
Eig02_EA(ri)	SM11_EA(dm)
Eig03_EA(ri)	S-107
Eig04_EA(ri)	C-007
Eig05_EA(ri)	F07[N-P]
Eig06_EA(ri)	SM13_EA(dm)
Eig07_EA(ri)	B10[C-C]
Eig08_EA(ri)	SM15_EA(dm)
Eig09_EA(ri)	NaaCH
Eig10_EA(ri)	MaxsNH2
Eig11_EA(ri)	B02[C-O]
Eig12_EA(ri)	F03[N-N]
Eig13_EA(ri)	SpDiam_A
Eig14_EA(ri)	P_VSA_ppp_P
Eig15_EA(ri)	SM09_EA(bo)
Eig01_AEA(ed)	BIC1
Eig02_AEA(ed)	B07[N-P]
Eig03_AEA(ed)	SRW05
Eig04_AEA(ed)	CATS2D_00_PP
Eig05_AEA(ed)	AMW
Eig06_AEA(ed)	F02[O-P]
Eig07_AEA(ed)	Eig02_AEA(dm)
Eig08_AEA(ed)	B02[O-P]
Eig09_AEA(ed)	B08[N-O]
Eig10_AEA(ed)	SpPosA_B(p)
Eig11_AEA(ed)	Eta_D_epsiD
Eig12_AEA(ed)	GATS1p
Eig13_AEA(ed)	B07[C-O]
Eig14_AEA(ed)	MaxaaCH
Eig15_AEA(ed)	MATS5i
Eig01_AEA(bo)	nImidazoles
Eig02_AEA(bo)	P_VSA_i_2
Eig03_AEA(bo)	CATS2D_00_DP
Eig04_AEA(bo)	NsNH2
Eig05_AEA(bo)	VE1sign_A
Eig06_AEA(bo)	nCIC
Eig07_AEA(bo)	C-026
Eig08_AEA(bo)	JGI7
Eig09_AEA(bo)	minsssN
Eig10_AEA(bo)	SpDiam_B(e)
Eig11_AEA(bo)	B10[C-F]
Eig12_AEA(bo)	Eta_FL
Eig13_AEA(bo)	SM12_EA
Eig14_AEA(bo)	NRS
Eig15_AEA(bo)	T(N..S)
Eig01_AEA(dm)	minsNH2
Eig02_AEA(dm)	SpPosA_B(m)
Eig03_AEA(dm)	SM05_EA(dm)
Eig04_AEA(dm)	MATS1v
Eig05_AEA(dm)	SM09_EA(dm)
Eig06_AEA(dm)	SM07_EA(dm)
Eig07_AEA(dm)	P_VSA_LogP_5
Eig08_AEA(dm)	MATS5p
Eig09_AEA(dm)	SM10_AEA(ed)
Eig10_AEA(dm)	F10[C-F]
Eig11_AEA(dm)	ChiA_H2
Eig12_AEA(dm)	B08[C-C]
Eig13_AEA(dm)	GATS5m
Eig14_AEA(dm)	C-001
Eig15_AEA(dm)	piPC10
Eig01_AEA(ri)	GATS8p
Eig02_AEA(ri)	SM08_EA(bo)
Eig03_AEA(ri)	MATS7i
Eig04_AEA(ri)	VE1sign_H2
Eig05_AEA(ri)	CATS2D_04_AP
Eig06_AEA(ri)	F05[N-O]
Eig07_AEA(ri)	NsssN
Eig08_AEA(ri)	nCt
Eig09_AEA(ri)	nRCOOR
Eig10_AEA(ri)
Eig11_AEA(ri)
Eig12_AEA(ri)
Eig13_AEA(ri)
Eig14_AEA(ri)
Eig15_AEA(ri)
nCp
nCs
nCt
nCq
nCrs
nCrt
nCrq
nCar
nCbH
nCb-
nCconj
nR=Cp
nR=Cs
nR=Ct
n=C=
nR#CH/X
nR#C-
nROCN
nArOCN
nRNCO
nArNCO
nRSCN
nArSCN
nRNCS
nArNCS
nRCOOH
nArCOOH
nRCOOR
nArCOOR
nRCONH2
nArCONH2
nRCONHR
nArCONHR
nRCONR2
nArCONR2
nROCON
nArOCON
nRCOX
nArCOX
nRCSOH
nArCSOH
nRCSSH
nArCSSH
nRCOSR
nArCOSR
nRCSSR
nArCSSR
nRCHO
nArCHO
nRCO
nArCO
nCONN
nC=O(O)2
nN=C-N<
nC(=N)N2
nRC=N
nArC=N
nRCNO
nArCNO
nRNH2
nArNH2
nRNHR
nArNHR
nRNR2
nArNR2
nN-N
nN=N
nRCN
nArCN
nN+
nNq
nRNHO
nArNHO
nRNNOx
nArNNOx
nRNO
nArNO
nRNO2
nArNO2
nN(CO)2
nC=N-N<
nROH
nArOH
nOHp
nOHs
nOHt
nROR
nArOR
nROX
nArOX
nO(C=O)2
nH2O
nSH
nC=S
nRSR
nRSSR
nSO
nS(=O)2
nSOH
nSOOH
nSO2OH
nSO3OH
nSO2
nSO3
nSO4
nSO2N
nPO3
nPO4
nPR3
nP(=O)O2R
nP(=O)R3/nPR5
nCH2RX
nCHR2X
nCR3X
nR=CHX
nR=CRX
nR#CX
nCHRX2
nCR2X2
nR=CX2
nCRX3
nArX
nCXr
nCXr=
nCconjX
nAziridines
nOxiranes
nThiranes
nAzetidines
nOxetanes
nThioethanes
nBeta-Lactams
nPyrrolidines
nOxolanes
ntH-Thiophenes
nPyrroles
nPyrazoles
nImidazoles
nFuranes
nThiophenes
nOxazoles
nIsoxazoles
nThiazoles
nIsothiazoles
nTriazoles
nPyridines
nPyridazines
nPyrimidines
nPyrazines
n135-Triazines
n124-Triazines
nHDon
nHAcc
C-001
C-002
C-003
C-004
C-005
C-006
C-007
C-008
C-009
C-010
C-011
C-012
C-013
C-014
C-015
C-016
C-017
C-018
C-019
C-020
C-021
C-022
C-023
C-024
C-025
C-026
C-027
C-028
C-029
C-030
C-031
C-032
C-033
C-034
C-035
C-036
C-037
C-038
C-039
C-040
C-041
C-042
C-043
C-044
H-046
H-047
H-048
H-049
H-050
H-051
H-052
H-053
H-054
H-055
O-056
O-057
O-058
O-059
O-060
O-061
O-062
O-063
Se-064
Se-065
N-066
N-067
N-068
N-069
N-070
N-071
N-072
N-073
N-074
N-075
N-076
N-077
N-078
N-079
F-081
F-082
F-083
F-084
F-085
Cl-086
Cl-087
Cl-088
Cl-089
Cl-090
Br-091
Br-092
Br-093
Br-094
Br-095
I-096
I-097
I-098
I-099
I-100
F-101
Cl-102
Br-103
I-104
S-106
S-107
S-108
S-109
S-110
Si-111
B-112
P-115
P-116
P-117
P-118
P-119
P-120
SsCH3
SdCH2
SssCH2
StCH
SdsCH
SaaCH
SsssCH
SddC
StsC
SdssC
SaasC
SaaaC
SssssC
SsNH2
SssNH
SdNH
SsssN
SdsN
SaaN
StN
SsNH3+
SssNH2+
SdNH2+
SsssNH+
SssssN+
SddsN
SaadN
SaasN
SaaNH
SsOH
SdO
SssO
SaaO
SsPH2
SssPH
SsssP
SdsssP
SddsP
SsssssP
SsSH
SdS
SssS
SaaS
SdssS
SddssS
SssssssS
SsF
SsCl
SsBr
SsI
SsLi
SssBe
SssssBe-
SsBH2
SssBH
SsssB
SssssB-
SsGeH3
SssGeH2
SsssGeH
SssssGe
SsAsH2
SssAsH
SsssAs
SsssssAs
SdsssAs
SddsAs
SsSeH
SdSe
SssSe
SaaSe
SdssSe
SssssssSe
SddssSe
SsSnH3
SssSnH2
SsssSnH
SssssSn
SsPbH3
SssPbH2
SsssPbH
SssssPb
SsSiH3
SssSiH2
SsssSiH
SssssSi
NsCH3
NdCH2
NssCH2
NtCH
NdsCH
NaaCH
NsssCH
NddC
NtsC
NdssC
NaasC
NaaaC
NssssC
NsNH2
NssNH
NdNH
NsssN
NdsN
NaaN
NtN
NsNH3+
NssNH2+
NdNH2+
NsssNH+
NssssN+
NddsN
NaadN
NaasN
NaaNH
NsOH
NdO
NssO
NaaO
NsPH2
NssPH
NsssP
NdsssP
NddsP
NsssssP
NsSH
NdS
NssS
NaaS
NdssS
NddssS
NssssssS
NsF
NsCl
NsBr
NsI
NsLi
NssBe
NssssBe-
NsBH2
NssBH
NsssB
NssssB-
NsGeH3
NssGeH2
NsssGeH
NssssGe
NsAsH2
NssAsH
NsssAs
NsssssAs
NdsssAs
NddsAs
NsSeH
NdSe
NssSe
NaaSe
NdssSe
NssssssSe
NddssSe
NsSnH3
NssSnH2
NsssSnH
NssssSn
NsPbH3
NssPbH2
NsssPbH
NssssPb
NsSiH3
NssSiH2
NsssSiH
NssssSi
minsCH3
mindCH2
minssCH2
mintCH
mindsCH
minaaCH
minsssCH
minddC
mintsC
mindssC
minaasC
minaaaC
minssssC
minsNH2
minssNH
mindNH
minsssN
mindsN
minaaN
mintN
minsNH3+
minssNH2+
mindNH2+
minsssNH+
minssssN+
minddsN
minaadN
minaasN
minaaNH
minsOH
mindO
minssO
minaaO
minsPH2
minssPH
minsssP
mindsssP
minddsP
minsssssP
minsSH
mindS
minssS
minaaS
mindssS
minddssS
minssssssS
minsF
minsCl
minsBr
minsI
minsLi
minssBe
minssssBe-
minsBH2
minssBH
minsssB
minssssB-
minsGeH3
minssGeH2
minsssGeH
minssssGe
minsAsH2
minssAsH
minsssAs
minsssssAs
mindsssAs
minddsAs
minsSeH
mindSe
minssSe
minaaSe
mindssSe
minssssssSe
minddssSe
minsSnH3
minssSnH2
minsssSnH
minssssSn
minsPbH3
minssPbH2
minsssPbH
minssssPb
minsSiH3
minssSiH2
minsssSiH
minssssSi
gmin
MaxsCH3
MaxdCH2
MaxssCH2
MaxtCH
MaxdsCH
MaxaaCH
MaxsssCH
MaxddC
MaxtsC
MaxdssC
MaxaasC
MaxaaaC
MaxssssC
MaxsNH2
MaxssNH
MaxdNH
MaxsssN
MaxdsN
MaxaaN
MaxtN
MaxsNH3+
MaxssNH2+
MaxdNH2+
MaxsssNH+
MaxssssN+
MaxddsN
MaxaadN
MaxaasN
MaxaaNH
MaxsOH
MaxdO
MaxssO
MaxaaO
MaxsPH2
MaxssPH
MaxsssP
MaxdsssP
MaxddsP
MaxsssssP
MaxsSH
MaxdS
MaxssS
[truncated: 1,907 more rows]

## Sheet: 5. EBV
Supplementary Data 4. The optimal combination of descriptors of each algorithm
Bioactivity dataset 1. Biological toxicology
Descriptprs-Original (n=3918)	Descriptprs-Wilcoxon (n=1464)	Descriptprs-Spearman (n=218)	Descriptprs-RFE (XGBoost, n=146)	Descriptprs-DT (n=211)	Descriptprs-LR (n=148)	Descriptprs-RF (n=207)
MW	Ui	Ui	Ui	SM12_AEA(ri)	Ui	Ui
AMW	Eta_betaP	QED	QED	Mv	QED	QED
Sv	SM6_B(p)	TPSA(Tot)	TPSA(Tot)	SpMax2_Bh(m)	TPSA(Tot)	TPSA(Tot)
Se	piID	NaasC	NaasC	SpMax2_Bh(e)	NaasC	NaasC
Sp	SM04_EA(bo)	ESOL	ESOL	SM1_Dz(Z)	ESOL	ESOL
Si	SM5_B(p)	SM12_AEA(ri)	SM12_AEA(ri)	nCrs	Mv	SM12_AEA(ri)
Mv	SM6_B(m)	Mv	Mv	max_conj_path	SM1_Dz(Z)	Mv
Me	SM6_B(v)	SpMax2_Bh(m)	SpMax2_Bh(m)	IC1	nCrs	SpMax2_Bh(m)
Mp	Uc	SpMax2_Bh(e)	SpMax2_Bh(e)	SHED_DL	max_conj_path	SpMax2_Bh(e)
Mi	nBM	SM1_Dz(Z)	SM1_Dz(Z)	GGI1	SHED_DL	SM1_Dz(Z)
GD	SM5_B(m)	nCrs	nCrs	SpDiam_B(m)	F10[C-O]	nCrs
nAT	PCD	max_conj_path	max_conj_path	F10[C-O]	T(N..O)	max_conj_path
nSK	piPC03	IC1	IC1	T(N..O)	P_VSA_s_3	IC1
nAA	Eta_beta	SHED_DL	SHED_DL	P_VSA_s_3	F08[C-N]	SHED_DL
nTA	piPC04	GGI1	GGI1	F08[C-N]	SaasC	GGI1
nBT	SM13_AEA(ri)	SpDiam_B(m)	SpDiam_B(m)	F03[C-N]	s3_relPathLength	SpDiam_B(m)
nBO	Eig03_EA(bo)	F10[C-O]	F10[C-O]	SaasC	CATS2D_02_DA	F10[C-O]
nBM	P_VSA_e_2	T(N..O)	T(N..O)	ATSC1e	CATS2D_07_DL	T(N..O)
SCBO	Eta_FL	P_VSA_s_3	P_VSA_s_3	s3_relPathLength	CATS2D_04_DL	P_VSA_s_3
RBN	SM5_B(v)	F08[C-N]	F08[C-N]	CATS2D_02_DA	nCb-	F08[C-N]
RBF	ZM2V	F03[C-N]	F03[C-N]	CATS2D_07_DL	NsssCH	F03[C-N]
nDB	ZM2MulPer	SaasC	SaasC	CATS2D_04_DL	CATS2D_03_LL	SaasC
nTB	SM6_B(e)	ATSC1e	ATSC1e	nCb-	F09[N-O]	ATSC1e
nAB	piPC02	s3_relPathLength	s3_relPathLength	nCs	P_VSA_charge_10	s3_relPathLength
nH	SM02_EA(bo)	CATS2D_02_DA	CATS2D_02_DA	NsssCH	P_VSA_charge_7	CATS2D_02_DA
nC	SM4_B(p)	CATS2D_07_DL	CATS2D_07_DL	CATS2D_03_LL	CATS2D_08_DL	CATS2D_07_DL
nN	SM4_B(m)	CATS2D_04_DL	CATS2D_04_DL	F09[N-O]	CATS2D_09_AA	CATS2D_04_DL
nO	Eig06_EA(bo)	nCb-	nCb-	P_VSA_charge_10	SpMin2_Bh(i)	nCb-
nP	SM06_EA(bo)	nCs	nCs	P_VSA_e_3	P_VSA_LogP_6	nCs
nS	ZM2Per	NsssCH	NsssCH	P_VSA_charge_7	CATS2D_09_DA	NsssCH
nF	Eig05_EA(bo)	CATS2D_03_LL	CATS2D_03_LL	nHDon	nDB	CATS2D_03_LL
nCL	SM15_AEA(ri)	F09[N-O]	F09[N-O]	CATS2D_08_DL	P_VSA_s_5	F09[N-O]
nBR	P_VSA_p_3	P_VSA_charge_10	P_VSA_charge_10	SHED_DA	F09[C-N]	P_VSA_charge_10
nI	P_VSA_v_3	P_VSA_e_3	P_VSA_e_3	CATS2D_09_AA	CATS2D_02_DL	P_VSA_e_3
nB	SM6_B(i)	P_VSA_charge_7	P_VSA_charge_7	SpMin2_Bh(i)	CATS2D_03_AL	P_VSA_charge_7
nHM	SM5_B(e)	nHDon	SHED_DA	P_VSA_LogP_6	CATS2D_07_AL	nHDon
nHet	SM03_EA(bo)	CATS2D_08_DL	CATS2D_09_AA	CATS2D_09_DA	F03[C-S]	CATS2D_08_DL
nX	SM05_EA(bo)	SHED_DA	SpMin2_Bh(i)	SssCH2	J_D/Dt	SHED_DA
H%	SM4_B(v)	CATS2D_09_AA	P_VSA_LogP_6	nDB	D/Dtr05	CATS2D_09_AA
C%	piPC05	SpMin2_Bh(i)	CATS2D_09_DA	P_VSA_s_5	T(N..N)	SpMin2_Bh(i)
N%	Eig06_AEA(bo)	P_VSA_LogP_6	SssCH2	F09[C-N]	F05[N-N]	P_VSA_LogP_6
O%	piPC06	CATS2D_09_DA	nDB	F10[C-N]	CATS2D_04_DA	CATS2D_09_DA
X%	SM5_B(i)	SssCH2	P_VSA_s_5	CATS2D_02_DL	SHED_AA	SssCH2
nCsp3	QED	nDB	F10[C-N]	CATS2D_03_AL	F10[N-O]	nDB
nCsp2	ZM1Per	P_VSA_s_5	CATS2D_02_DL	F06[C-N]	CATS2D_09_LL	P_VSA_s_5
nCsp	ZM2Kup	F09[C-N]	SIC5	P_VSA_charge_1	IC2	F09[C-N]
Fsp3	EE_B(m)	F10[C-N]	F03[C-S]	CATS2D_07_AL	C-026	F10[C-N]
max_conj_path	SM3_B(m)	CATS2D_02_DL	GATS8i	SIC5	SHED_LL	CATS2D_02_DL
nStructures	SM4_B(e)	CATS2D_03_AL	J_D/Dt	CATS2D_09_DL	VE2sign_Dz(e)	CATS2D_03_AL
totalcharge	SM05_AEA(bo)	F06[C-N]	D/Dtr05	F03[C-S]	P_VSA_MR_7	F06[C-N]
nCIC	SM04_AEA(bo)	P_VSA_charge_1	RNCG	GATS8i	minsssN	P_VSA_charge_1
nCIR	SM3_B(p)	CATS2D_07_AL	T(N..N)	J_D/Dt	P_VSA_charge_5	CATS2D_07_AL
TRS	EE_B(p)	SIC5	CATS2D_04_DA	F07[C-N]	F04[N-O]	SIC5
Rperim	SM03_AEA(bo)	CATS2D_09_DL	SHED_AA	D/Dtr05	F04[O-S]	CATS2D_09_DL
Rbrid	PCR	F03[C-S]	F10[N-O]	P_VSA_LogP_5	P_VSA_charge_9	F03[C-S]
MCD	Eig08_AEA(bo)	GATS8i	LDI	RNCG	VE1_H2	GATS8i
RFD	SM4_B(i)	J_D/Dt	CATS2D_09_LL	T(N..N)	H-052	J_D/Dt
RCI	SM06_AEA(bo)	F07[C-N]	IC2	F05[N-N]	CATS2D_06_AL	F07[C-N]
NRS	Eig07_EA(bo)	D/Dtr05	C-026	CATS2D_04_DA	P_VSA_LogP_4	D/Dtr05
NNRS	piPC07	P_VSA_LogP_5	MDEN-22	SHED_AA	D/Dtr09	P_VSA_LogP_5
nSpiro	ZM1MulPer	RNCG	MATS1v	F10[N-O]	CATS2D_07_AA	RNCG
nBridgeHead	ZM1V	T(N..N)	SHED_LL	LDI	CATS2D_05_DL	T(N..N)
nR03	TPSA(Tot)	F05[N-N]	VE2sign_Dz(e)	CATS2D_09_LL	VE1sign_D/Dt	F05[N-N]
nR04	SpMax3_Bh(m)	CATS2D_04_DA	RPCG	IC2	GATS2v	CATS2D_04_DA
nR05	Eig08_EA(bo)	SHED_AA	P_VSA_MR_7	C-026	C-034	SHED_AA
nR06	Eig04_EA(bo)	F10[N-O]	minsssN	P_VSA_charge_6	NdsCH	F10[N-O]
nR07	SM14_AEA(ri)	LDI	CATS2D_05_DA	MDEN-22	NRS	LDI
nR08	nCsp2	CATS2D_09_LL	P_VSA_charge_5	MATS1v	CATS2D_04_LL	CATS2D_09_LL
nR09	P_VSA_ppp_cyc	IC2	CATS2D_04_AL	CATS2D_03_DL	C-008	IC2
nR10	NaasC	C-026	F06[C-O]	SHED_LL	C-041	C-026
nR11	SM08_EA(bo)	P_VSA_charge_6	F04[N-O]	P_VSA_ppp_ter	C-028	P_VSA_charge_6
nR12	SM07_AEA(bo)	MDEN-22	F04[O-S]	VE2sign_Dz(e)	H-048	MDEN-22
nBnz	Eta_F	MATS1v	P_VSA_charge_9	RPCG	CATS2D_04_AA	MATS1v
ARR	piPC10	CATS2D_03_DL	VE1_H2	P_VSA_MR_7	minssCH2	CATS2D_03_DL
AP	Eig05_AEA(bo)	SHED_LL	H-052	minsssN	N-074	SHED_LL
D/Dtr03	SM07_EA(bo)	P_VSA_ppp_ter	P_VSA_LogP_4	CATS2D_05_DA	B10[C-N]	P_VSA_ppp_ter
D/Dtr04	SM2_B(m)	VE2sign_Dz(e)	F04[C-N]	P_VSA_charge_5	SpMin2_Bh(p)	VE2sign_Dz(e)
D/Dtr05	Eig07_AEA(bo)	RPCG	D/Dtr09	CATS2D_04_AL	CATS2D_08_LL	RPCG
D/Dtr06	EE_B(v)	P_VSA_MR_7	VE1sign_D/Dt	F06[C-O]	nCconj	P_VSA_MR_7
D/Dtr07	SM3_B(v)	minsssN	GATS2v	F04[N-O]	SRW09	minsssN
D/Dtr08	piPC01	CATS2D_05_DA	C-034	F04[O-S]	SdO	CATS2D_05_DA
D/Dtr09	SCBO	P_VSA_charge_5	NdsCH	P_VSA_charge_9	P_VSA_charge_3	P_VSA_charge_5
D/Dtr10	SpAD_EA(bo)	CATS2D_04_AL	C-008	CATS2D_07_DA	JGI2	CATS2D_04_AL
D/Dtr11	piPC09	F06[C-O]	CATS2D_09_AL	F02[N-N]	F07[N-O]	F06[C-O]
D/Dtr12	piPC08	F04[N-O]	C-041	CATS2D_05_AL	GATS6i	F04[N-O]
ZM1	P_VSA_m_2	F04[O-S]	CATS2D_04_AA	VE1_H2	CATS2D_02_AL	F04[O-S]
ZM1V	Eig03_AEA(bo)	P_VSA_charge_9	N-074	H-052	Eig04_EA(dm)	P_VSA_charge_9
ZM1Kup	H_Dz(p)	CATS2D_07_DA	B10[C-N]	CATS2D_06_AL	F03[C-O]	CATS2D_07_DA
ZM1Mad	H_Dz(Z)	F02[N-N]	CATS2D_08_LL	P_VSA_LogP_4	P_VSA_charge_11	F02[N-N]
ZM1Per	H_Dz(m)	CATS2D_05_AL	nCconj	F04[C-N]	nRNR2	CATS2D_05_AL
ZM1MulPer	SM08_AEA(bo)	VE1_H2	SRW09	D/Dtr09	CATS2D_06_DA	VE1_H2
ZM2	Eig09_AEA(bo)	H-052	SdO	CATS2D_07_AA	MATS1e	H-052
ZM2V	SM2_B(p)	CATS2D_06_AL	P_VSA_charge_3	CATS2D_05_DL	VE2sign_Dz(v)	CATS2D_06_AL
ZM2Kup	EE_B(e)	P_VSA_LogP_4	JGI2	F09[C-O]	VE2sign_Dt	P_VSA_LogP_4
ZM2Mad	Eig04_AEA(bo)	F04[C-N]	GATS6i	VE1sign_D/Dt	minssNH	F04[C-N]
ZM2Per	SM02_AEA(bo)	D/Dtr09	SM02_EA(dm)	GATS2v	MDEN-13	D/Dtr09
ZM2MulPer	SM3_B(e)	CATS2D_07_AA	CATS2D_06_DL	F08[C-O]	GATS2m	CATS2D_07_AA
ON0	P_VSA_ppp_L	CATS2D_05_DL	Eig04_EA(dm)	C-034	MATS3i	CATS2D_05_DL
ON0V	QEDu	F09[C-O]	F03[C-O]	NdsCH	minaasC	F09[C-O]
ON1	EE_B(i)	VE1sign_D/Dt	P_VSA_charge_11	NRS	B10[C-O]	VE1sign_D/Dt
ON1V	GMTIV	GATS2v	MATS1e	CATS2D_04_LL	SpMAD_AEA(dm)	GATS2v
Qindex	ZM1Mad	F08[C-O]	VE2sign_Dz(v)	C-008	GATS4p	F08[C-O]
BBI	Eig09_EA(bo)	C-034	mindssC	CATS2D_09_AL	mintsC	C-034
DBI	SM3_B(i)	NdsCH	VE2sign_Dt	C-041	F07[N-N]	NdsCH
SNar	SM2_B(v)	NRS	MaxdO	CATS2D_04_AA	CATS2D_08_DA	NRS
HNar	nAA	CATS2D_04_LL	VE2sign_D	minssCH2	GATS5e	CATS2D_04_LL
GNar	Wap	C-008	minssNH	N-074	F02[N-O]	C-008
Xt	HyWi_B(m)	CATS2D_09_AL	MDEN-13	B10[C-N]	B04[N-O]	CATS2D_09_AL
Dz	Eta_F_A	C-041	GATS2m	SpMin2_Bh(p)	F08[N-O]	C-041
Ram	H_Dz(v)	C-028	minaasC	CATS2D_08_LL	MaxaaN	C-028
Pol	nAB	H-048	Chi0_EA(dm)	nCconj	NaaS	CATS2D_04_AA
LPRS	ESOL	CATS2D_04_AA	SpMAD_AEA(dm)	SRW09	JGI7	minssCH2
MSD	ZM2Mad	minssCH2	GATS4p	SdO	F05[C-O]	N-074
SPI	SM2_B(e)	N-074	mintsC	P_VSA_charge_3	CATS2D_04_PL	B10[C-N]
ECC	Chi_Dt	B10[C-N]	GATS5e	JGI2	F05[N-S]	SpMin2_Bh(p)
AECC	P_VSA_ppp_con	SpMin2_Bh(p)	B04[N-O]	F07[N-O]	GATS7m	CATS2D_08_LL
DECC	SM2_B(i)	CATS2D_08_LL	MaxaaN	GATS6i	F05[C-N]	nCconj
MDDD	SM09_EA(bo)	nCconj	F05[C-O]	CATS2D_08_AL	P_VSA_charge_2	SRW09
UNIP	SM12_AEA(ri)	SRW09	CATS2D_04_PL	CATS2D_05_LL	GATS1e	SdO
CENT	Eig02_EA(bo)	SdO	F05[N-S]	SM02_EA(dm)	N-073	P_VSA_charge_3
VAR	SpMaxA_Dt	P_VSA_charge_3	Eta_sh_y	CATS2D_06_DL	GATS2i	JGI2
ICR	SpMAD_Dt	JGI2	GATS7m	CATS2D_02_AL	s2_phRelSize	F07[N-O]
MaxTD	SpPosA_Dt	F07[N-O]	F05[C-N]	nCrt	CATS2D_05_AA	GATS6i
MeanTD	SpDiam_Dt	GATS6i	P_VSA_charge_2	Eig04_EA(dm)	nN(CO)2	CATS2D_08_AL
MaxDD	Eig10_AEA(bo)	CATS2D_08_AL	ChiA_X	F03[C-O]	Eig02_AEA(dm)	CATS2D_05_LL
MeanDD	WiA_Dt	CATS2D_05_LL	GATS2i	P_VSA_charge_11	N-071	SM02_EA(dm)
SMTI	SM10_EA(bo)	SM02_EA(dm)	s2_phRelSize	nRNR2	P_VSA_charge_4	CATS2D_06_DL
SMTIV	TPC	CATS2D_06_DL	MATS1m	CATS2D_06_DA	N-070	CATS2D_02_AL
GMTI	Mv	CATS2D_02_AL	CATS2D_05_AA	MATS1e	s2_numSharedNeighbors	nCrt
GMTIV	MeanDD	nCrt	nN(CO)2	VE2sign_Dz(v)	GATS4m	Eig04_EA(dm)
Xu	SpAbs_B(m)	Eig04_EA(dm)	Eig02_AEA(dm)	mindssC	F05[N-O]	F03[C-O]
CSI	SpMax2_Bh(m)	F03[C-O]	N-071	VE2sign_Dt	Eta_D_AlphaB	P_VSA_charge_11
Wap	ChiA_Dt	P_VSA_charge_11	P_VSA_charge_4	MaxdO	N-066	nRNR2
S1K	AVS_Dt	nRNR2	GATS4m	VE2sign_D	CATS2D_08_AP	CATS2D_06_DA
S2K	Eta_D_epsiB	CATS2D_06_DA	F05[N-O]	minssNH	MATS6v	MATS1e
S3K	SM2_Dt	MATS1e	F07[C-O]	MDEN-13	NssS	VE2sign_Dz(v)
PHI	HyWi_Dt	VE2sign_Dz(v)	Eta_D_AlphaB	GATS2m	CATS2D_01_AA	mindssC
PW2	HyWi_B(p)	mindssC	MATS6v	MATS3i	VE1sign_A	VE2sign_Dt
PW3	Fsp3	VE2sign_Dt	CATS2D_01_AA	minaasC	MATS3e	MaxdO
PW4	SM4_Dt	MaxdO	VE1sign_A	Chi0_EA(dm)	F04[N-N]	VE2sign_D
PW5	SpAD_B(m)	VE2sign_D	MATS3e	C-025	N-072	minssNH
MAXDN	SpMax_Dt	minssNH	SAscore	B10[C-O]	nR#C-	MDEN-13
MAXDP	SM6_Dt	MDEN-13	GATS4e	SpMAD_AEA(dm)	C-032	GATS2m
DELS	Eig06_EA(ed)	GATS2m	MATS5m	GATS4p	Eig14_EA(dm)	MATS3i
TIE	SM15_AEA(dm)	MATS3i	CATS2D_04_DD	F10[C-S]	MATS5m	minaasC
BAC	SM5_Dt	minaasC	JGI10	mintsC	CATS2D_04_DD	Chi0_EA(dm)
LOC	SpAD_Dt	Chi0_EA(dm)		F07[N-N]	Eig15_EA(dm)	C-025
MWC01	SpPos_Dt	C-025		CATS2D_08_DA	JGI10	B10[C-O]
MWC02	MaxDD	B10[C-O]		GATS5e		SpMAD_AEA(dm)
MWC03	GATS1v	SpMAD_AEA(dm)		F02[N-O]		GATS4p
MWC04	Xindex	GATS4p		B04[N-O]		F10[C-S]
MWC05	Eig11_AEA(bo)	F10[C-S]		s3_numSharedNeighbors		mintsC
MWC06	SM3_Dt	mintsC		C-033		F07[N-N]
MWC07	Vindex	F07[N-N]		F08[N-O]		CATS2D_08_DA
MWC08	Eig08_AEA(ed)	CATS2D_08_DA		MaxaaN		GATS5e
MWC09	ZM1Kup	GATS5e		NaaS		F02[N-O]
MWC10	ATS2m	F02[N-O]		JGI7		B04[N-O]
SRW02	H_Dz(e)	B04[N-O]		F05[C-O]		s3_numSharedNeighbors
SRW03	Yindex	s3_numSharedNeighbors		CATS2D_04_PL		C-033
SRW04	SpAbs_B(p)	C-033		F05[N-S]		F08[N-O]
SRW05	J_D	F08[N-O]		Eta_sh_y		MaxaaN
SRW06	SpPos_B(m)	MaxaaN		GATS7m		NaaS
SRW07	Eig10_EA(bo)	NaaS		F05[C-N]		JGI7
SRW08	Ho_B(m)	JGI7		P_VSA_charge_2		F05[C-O]
SRW09	SMTIV	F05[C-O]		ChiA_X		CATS2D_04_PL
SRW10	SpAbs_B(v)	CATS2D_04_PL		GATS1e		F05[N-S]
MPC01	Eig06_EA	F05[N-S]		N-073		Eta_sh_y
MPC02	SM14_AEA(bo)	Eta_sh_y		GATS2i		GATS7m
MPC03	LOGP99	GATS7m		MDEO-22		F05[C-N]
MPC04	HyWi_B(v)	F05[C-N]		s2_phRelSize		P_VSA_charge_2
MPC05	SpAD_B(p)	P_VSA_charge_2		CATS2D_03_DA		ChiA_X
MPC06	Eig14_AEA(bo)	ChiA_X		MATS1m		GATS1e
MPC07	P_VSA_i_2	GATS1e		NaaaC		N-073
MPC08	Eig08_EA(ed)	N-073		CATS2D_05_AA		GATS2i
MPC09	SM03_AEA(ri)	GATS2i		C-040		MDEO-22
MPC10	Wi_B(m)	MDEO-22		nN(CO)2		s2_phRelSize
piPC01	SpMax2_Bh(e)	s2_phRelSize		Eig02_AEA(dm)		CATS2D_03_DA
piPC02	SpAbs_B(e)	CATS2D_03_DA		B09[C-N]		MATS1m
piPC03	Eig06_AEA(ri)	MATS1m		N-071		NaaaC
piPC04	Eig06_AEA(ed)	NaaaC		P_VSA_charge_13		CATS2D_05_AA
piPC05	ChiA_B(m)	CATS2D_05_AA		P_VSA_charge_4		C-040
piPC06	SpAbs_B(i)	C-040		N-070		nN(CO)2
piPC07	SpAD_B(v)	nN(CO)2		s2_numSharedNeighbors		Eig02_AEA(dm)
piPC08	H%	Eig02_AEA(dm)		GATS4m		N-071
piPC09	Ho_B(p)	B09[C-N]		CATS2D_02_AA		P_VSA_charge_13
piPC10	SM11_EA(bo)	N-071		F05[N-O]		P_VSA_charge_4
TWC	Eta_betaP_A	P_VSA_charge_13		F06[N-N]		GATS4m
TPC	SpAD_B(e)	P_VSA_charge_4		F07[C-O]		CATS2D_02_AA
piID	SpAD_B(i)	N-070		Eta_D_AlphaB		F05[N-O]
PCR	H_Dz(i)	s2_numSharedNeighbors		N-066		F06[N-N]
PCD	Mp	GATS4m		CATS2D_08_AP		F07[C-O]
CID	Wi_Dt	CATS2D_02_AA		MATS6v		Eta_D_AlphaB
BID	Eta_beta_A	F05[N-O]		NssS		MATS6v
ISIZ	HyWi_B(e)	F06[N-N]		CATS2D_01_AA		CATS2D_01_AA
IAC	Ho_B(v)	F07[C-O]		VE1sign_A		VE1sign_A
AAC	Eig11_EA(bo)	Eta_D_AlphaB		MATS3e		MATS3e
IDE	P_VSA_ppp_ar	N-066		SAscore		SAscore
IDM	SM12_EA(bo)	CATS2D_08_AP		F04[N-N]		F04[N-N]
IDDE	AVS_B(m)	MATS6v		B07[O-S]		B07[O-S]
IDDM	TI1_L	NssS		N-072		N-072
IDET	HyWi_B(i)	CATS2D_01_AA		GATS8p		GATS8p
IDMT	SpPos_B(p)	VE1sign_A		nR#C-		F02[C-N]
IVDE	CSI	MATS3e		F02[C-N]		GATS4e
IVDM	Wi_B(p)	SAscore		GATS4e		MATS5m
HVcpx	VE1_Dt	F04[N-N]		C-032		CATS2D_04_DD
HDcpx	Eig07_EA(ed)	B07[O-S]		Eig14_EA(dm)		JGI10
Uindex	SM02_AEA(ri)	N-072		MATS5m		F09[N-N]
Vindex	Eta_D_beta_A	GATS8p		CATS2D_04_DD
Xindex	Ho_B(e)	nR#C-		Eig15_EA(dm)
Yindex	Ho_Dt	F02[C-N]		JGI10
IC0	ATS1m	GATS4e		F09[N-N]
IC1	SpAD_AEA(dm)	C-032
IC2	Eig15_AEA(bo)	Eig14_EA(dm)
IC3	Ho_B(i)	MATS5m
IC4	H_D/Dt	CATS2D_04_DD
IC5	TPSA(NO)	Eig15_EA(dm)
TIC0	Eta_D_beta	JGI10
TIC1	Eig06_EA(ri)	F09[N-N]
TIC2	Qindex
TIC3	Eig12_AEA(bo)
TIC4	Wi_B(v)
TIC5	SpPos_B(v)
SIC0	SM1_B(m)
SIC1	Eig07_AEA(ed)
SIC2	SM1_Dz(Z)
SIC3	SM14_AEA(dm)
SIC4	Eig05_EA(ed)
SIC5	Eig13_AEA(bo)
CIC0	ECC
CIC1	Wi_B(e)
CIC2	SpDiam_D
CIC3	Eig08_AEA(dm)
CIC4	Eig06_AEA(dm)
CIC5	SpPos_B(e)
BIC0	SM1_Dz(m)
BIC1	Eig07_EA
BIC2	SM15_AEA(bo)
BIC3	SM02_AEA(dm)
BIC4	Eig08_EA
BIC5	GGI10
J_A	Wi_B(i)
SpPos_A	Eig11_AEA(dm)
SpPosA_A	nCar
SpPosLog_A	SM13_EA(bo)
SpMax_A	AVS_B(e)
SpMaxA_A	SpPos_B(i)
SpDiam_A	Eig08_AEA(ri)
SpAD_A	SpMAD_EA(bo)
SpMAD_A	GMTI
Ho_A	AECC
EE_A	VE1_Dz(e)
VE1_A	nCrs
VE2_A	Eig10_AEA(dm)
VE3_A	Eig05_AEA(ed)
VE1sign_A	SM2_D
VE2sign_A	IDE
VR1_A	HyWi_D
VR2_A	MaxTD
VR3_A	SM03_AEA(dm)
Wi_D	Eig09_EA
WiA_D	SpAD_AEA(bo)
AVS_D	SM14_EA(bo)
H_D	HVcpx
Chi_D	SMTI
ChiA_D	AVS_D
J_D	VE1_Dz(i)
HyWi_D	ChiA_D
SpPos_D	Eig07_AEA(ri)
SpPosA_D	MPC02
SpPosLog_D	BBI
SpMax_D	SM4_D
SpMaxA_D	UNIP
SpDiam_D	ChiA_B(e)
SpAD_D	LOGPcons
SpMAD_D	SM02_EA
Ho_D	SM6_D
SM2_D	SpMax_D
SM3_D	max_conj_path
SM4_D	ZM2
SM5_D	MWC03
SM6_D	H_X
VE1_D	AMW
VE2_D	SRW04
VE3_D	Eig14_AEA(dm)
VE1sign_D	SpPos_D
VE2sign_D	SpAD_D
VR1_D	MSD
VR2_D	VE1_Dz(v)
VR3_D	SM5_D
Acon	MPC03
QW_L	Eig12_EA(bo)
TI1_L	MWC04
TI2_L	IDDE
STN_L	MPC10
SpPos_L	SpMaxA_D
SpPosA_L	MWC02
SpPosLog_L	ZM1
SpMax_L	VE1_D
SpMaxA_L	Eig08_EA(ri)
SpDiam_L	ChiA_B(v)
SpAD_L	SpMAD_D
SpMAD_L	SpPosA_D
Ho_L	Eig14_EA(ed)
EE_L	SM09_AEA(ri)
SM2_L	SpPosLog_B(v)
SM3_L	Eig09_AEA(ri)
SM4_L	Ram
SM5_L	SpAD_EA(ed)
SM6_L	Chi1_EA(ri)
AVS_X	SM2_L
H_X	SpPosLog_B(e)
Chi_X	SpMaxA_AEA(ri)
ChiA_X	SpMaxA_EA(ri)
J_X	Eig14_EA(bo)
HyWi_X	SpAD_EA
SpPos_X	SNar
SpPosA_X	SRW06
SpPosLog_X	WiA_D
SpMax_X	Xt
SpMaxA_X	SpMaxA_AEA(ed)
SpDiam_X	Eta_alpha
SpAD_X	MPC04
SpMAD_X	SpPosLog_Dt
Ho_X	SpAD_AEA(ri)
EE_X	Eig12_AEA(ed)
SM2_X	SM3_L
SM3_X	Eig09_EA(ri)
SM4_X	IC1
SM5_X	Eig13_AEA(ed)
SM6_X	Eig11_AEA(ed)
Wi_H2	Wi_D
WiA_H2	VE1_Dz(Z)
AVS_H2	VE1_Dz(m)
Chi_H2	SM3_D
ChiA_H2	Chi1_AEA(ri)
J_H2	Chi1_AEA(dm)
HyWi_H2	Chi1_AEA(bo)
SpPos_H2	Chi1_AEA(ed)
SpPosA_H2	Chi1_EA
SpPosLog_H2	SpPosLog_B(i)
SpMax_H2	SpPosLog_B(m)
SpMaxA_H2	SpPosLog_B(p)
SpDiam_H2	Chi_X
SpAD_H2	SM02_AEA(ed)
SpMAD_H2	MWC05
Ho_H2	MR99
EE_H2	MRcons
SM2_H2	SM06_AEA(ri)
SM3_H2	Eig11_EA(ed)
SM4_H2	VR1_A
SM5_H2	Eig07_AEA(dm)
SM6_H2	ChiA_B(p)
VE1_H2	Eig14_EA(ri)
VE2_H2	SpMax6_Bh(m)
VE3_H2	IDMT
VE1sign_H2	AVS_B(i)
VE2sign_H2	SM2_H2
VR1_H2	MeanTD
VR2_H2	SM1_B(p)
VR3_H2	Eig14_AEA(ed)
Wi_Dt	SpMaxA_EA
WiA_Dt	Eig07_EA(ri)
AVS_Dt	VR1_H2
H_Dt	P_VSA_p_2
Chi_Dt	Eig15_EA(ri)
ChiA_Dt	ICR
J_Dt	SM3_H2
HyWi_Dt	ATS3m
SpPos_Dt	VR1_D/Dt
SpPosA_Dt	SHED_DL
SpPosLog_Dt	SM15_EA(bo)
SpMax_Dt	SpPos_L
SpMaxA_Dt	nBO
SpDiam_Dt	MPC01
SpAD_Dt	MWC01
SpMAD_Dt	SRW02
Ho_Dt	SpAD_AEA(ed)
SM2_Dt	Eig11_AEA(ri)
SM3_Dt	SM09_AEA(dm)
SM4_Dt	Eig15_EA
SM5_Dt	SpMax2_Bh(v)
SM6_Dt	SM4_L
VE1_Dt	Eig10_EA(ri)
VE2_Dt	Eig13_EA(bo)
VE3_Dt	Eig14_EA
VE1sign_Dt	SM08_AEA(dm)
VE2sign_Dt	SpPosA_B(v)
VR1_Dt	VE3_Dt
VR2_Dt	Eig10_AEA(ri)
VR3_Dt	AVS_B(v)
Wi_D/Dt	SRW08
WiA_D/Dt	SM4_H2
AVS_D/Dt	Eig11_EA
H_D/Dt	SM05_AEA(dm)
Chi_D/Dt	Eig09_EA(ed)
ChiA_D/Dt	SM04_AEA(ri)
J_D/Dt	Eig14_AEA(ri)
HyWi_D/Dt	Eig11_EA(ri)
SpPos_D/Dt	nCIC
SpPosA_D/Dt	Eig15_AEA(dm)
SpPosLog_D/Dt	Xu
SpMax_D/Dt	VE1_Dz(p)
SpMaxA_D/Dt	SpAD_EA(ri)
SpDiam_D/Dt	GGI9
SpAD_D/Dt	MWC06
SpMAD_D/Dt	AVS_B(p)
Ho_D/Dt	nHet
EE_D/Dt	SpPosA_B(e)
SM2_D/Dt	Eig15_AEA(ed)
SM3_D/Dt	IDET
SM4_D/Dt	Eig13_EA(ed)
SM5_D/Dt	SM08_AEA(ri)
SM6_D/Dt	EE_A
VE1_D/Dt	Eig09_AEA(dm)
VE2_D/Dt	Ho_L
VE3_D/Dt	SM02_EA(ri)
VE1sign_D/Dt	VE3_Dz(e)
VE2sign_D/Dt	SpMaxA_L
VR1_D/Dt	VR1_Dz(p)
VR2_D/Dt	ChiA_B(i)
VR3_D/Dt	SM04_AEA(dm)
Wi_Dz(Z)	Eig10_EA
WiA_Dz(Z)	MW
AVS_Dz(Z)	HyWi_H2
H_Dz(Z)	VE3_Dz(i)
Chi_Dz(Z)	LPRS
ChiA_Dz(Z)	Ho_H2
J_Dz(Z)	VR1_Dz(m)
HyWi_Dz(Z)	VR1_Dz(Z)
SpAbs_Dz(Z)	Mi
SpPos_Dz(Z)	MPC06
SpPosA_Dz(Z)	SM10_AEA(ri)
SpPosLog_Dz(Z)	Eig15_EA(ed)
SpMax_Dz(Z)	GGI1
SpMaxA_Dz(Z)	VR1_Dz(v)
SpDiam_Dz(Z)	CID
SpAD_Dz(Z)	VR1_Dz(i)
SpMAD_Dz(Z)	MPC05
Ho_Dz(Z)	Eig15_AEA(ri)
SM1_Dz(Z)	VR1_D
SM2_Dz(Z)	SM5_L
SM3_Dz(Z)	MPC09
SM4_Dz(Z)	VR1_Dz(e)
SM5_Dz(Z)	SpMAD_B(p)
SM6_Dz(Z)	SpDiam_B(m)
VE1_Dz(Z)	MDDD
VE2_Dz(Z)	VR3_A
VE3_Dz(Z)	Ho_A
VE1sign_Dz(Z)	VR1_Dt
VE2sign_Dz(Z)	Eig15_EA(bo)
VR1_Dz(Z)	VE3_Dz(v)
VR2_Dz(Z)	Eig04_EA(ed)
VR3_Dz(Z)	SM13_AEA(dm)
Wi_Dz(m)	EE_H2
WiA_Dz(m)	SM13_AEA(bo)
AVS_Dz(m)	Eig05_EA
H_Dz(m)	VR3_H2
Chi_Dz(m)	SpDiam_B(p)
ChiA_Dz(m)	VE3_D
J_Dz(m)	VE3_D/Dt
HyWi_Dz(m)	SpPosLog_D
SpAbs_Dz(m)	VE3_Dz(Z)
SpPos_Dz(m)	VE3_Dz(m)
SpPosA_Dz(m)	VR3_D/Dt
SpPosLog_Dz(m)	SpMax5_Bh(m)
SpMax_Dz(m)	SpPosLog_L
SpMaxA_Dz(m)	Eig09_AEA(ed)
SpDiam_Dz(m)	SpPos_H2
SpAD_Dz(m)	SpAD_H2
SpMAD_Dz(m)	VE1_D/Dt
Ho_Dz(m)	F10[C-O]
SM1_Dz(m)	MPC08
SM2_Dz(m)	Wi_H2
SM3_Dz(m)	Chi_H2
SM4_Dz(m)	TRS
SM5_Dz(m)	MWC07
SM6_Dz(m)	Eig04_AEA(dm)
VE1_Dz(m)	IDDM
VE2_Dz(m)	EE_L
VE3_Dz(m)	VE3_Dz(p)
VE1sign_Dz(m)	VR3_Dz(p)
VE2sign_Dz(m)	VR3_Dz(m)
VR1_Dz(m)	VR3_Dz(Z)
VR2_Dz(m)	SM1_B(v)
VR3_Dz(m)	Eig04_EA(ri)
Wi_Dz(v)	VR3_Dz(v)
WiA_Dz(v)	VR3_Dz(i)
AVS_Dz(v)	VR3_D
H_Dz(v)	Rperim
Chi_Dz(v)	VR3_Dz(e)
ChiA_Dz(v)	MPC07
J_Dz(v)	VR3_Dt
HyWi_Dz(v)	SM05_AEA(ri)
SpAbs_Dz(v)	Eig10_EA(ed)
SpPos_Dz(v)	SpAD_A
SpPosA_Dz(v)	SpPos_A
SpPosLog_Dz(v)	Eig13_AEA(dm)
SpMax_Dz(v)	SpPosLog_H2
SpMaxA_Dz(v)	SRW10
SpDiam_Dz(v)	STN_L
SpAD_Dz(v)	IVDM
SpMAD_Dz(v)	Eig04_AEA(ri)
Ho_Dz(v)	SM03_AEA(ed)
SM1_Dz(v)	IC5
SM2_Dz(v)	Chi0_AEA(ri)
SM3_Dz(v)	Chi0_EA
SM4_Dz(v)	Chi0_AEA(ed)
SM5_Dz(v)	Chi0_AEA(dm)
SM6_Dz(v)	Chi0_AEA(bo)
VE1_Dz(v)	T(N..O)
VE2_Dz(v)	P_VSA_s_3
VE3_Dz(v)	SpMax2_Bh(i)
VE1sign_Dz(v)	Chi0_EA(ri)
VE2sign_Dz(v)	IC4
VR1_Dz(v)	Eta_FL_A
VR2_Dz(v)	Eta_LR
VR3_Dz(v)	Eig04_EA
Wi_Dz(e)	SM12_AEA(bo)
WiA_Dz(e)	SM04_EA
AVS_Dz(e)	SpPosLog_A
H_Dz(e)	Acon
Chi_Dz(e)	SM5_H2
ChiA_Dz(e)	VE2_A
J_Dz(e)	Eig13_EA
HyWi_Dz(e)	SM07_AEA(dm)
SpAbs_Dz(e)	Eig10_AEA(ed)
SpPos_Dz(e)	Eig12_AEA(dm)
SpPosA_Dz(e)	SpMax2_Bh(p)
SpPosLog_Dz(e)	F08[C-N]
SpMax_Dz(e)	Eta_L_A
SpMaxA_Dz(e)	SpMaxA_X
SpDiam_Dz(e)	DECC
SpAD_Dz(e)	nSK
SpMAD_Dz(e)	Eig13_EA(ri)
Ho_Dz(e)	SM1_B(e)
SM1_Dz(e)	IC3
SM2_Dz(e)	Eig02_AEA(bo)
SM3_Dz(e)	P_VSA_v_2
SM4_Dz(e)	MWC08
SM5_Dz(e)	GATS1p
SM6_Dz(e)	SM07_AEA(ri)
VE1_Dz(e)	Eig12_EA(ed)
VE2_Dz(e)	Eig05_AEA(dm)
VE3_Dz(e)	QW_L
VE1sign_Dz(e)	SpAD_L
VE2sign_Dz(e)	Eig13_AEA(ri)
VR1_Dz(e)	SM02_EA(ed)
VR2_Dz(e)	H_D
VR3_Dz(e)	P_VSA_MR_6
Wi_Dz(p)	SM6_L
WiA_Dz(p)	BID
AVS_Dz(p)	Eta_betaS
H_Dz(p)	Chi_D
Chi_Dz(p)	SpMaxA_EA(ed)
ChiA_Dz(p)	SM1_B(i)
J_Dz(p)	Pol
HyWi_Dz(p)	Dz
SpAbs_Dz(p)	Eig05_AEA(ri)
SpPos_Dz(p)	HyWi_X
SpPosA_Dz(p)	SpMAD_B(m)
SpPosLog_Dz(p)	SM06_AEA(dm)
SpMax_Dz(p)	Eig12_EA
SpMaxA_Dz(p)	SpPosLog_Dz(i)
SpDiam_Dz(p)	P_VSA_s_6
SpAD_Dz(p)	IDM
SpMAD_Dz(p)	Chi1_EA(ed)
Ho_Dz(p)	SpMaxA_H2
SM1_Dz(p)	F03[C-N]
SM2_Dz(p)	Eig12_EA(ri)
SM3_Dz(p)	nCsp3
SM4_Dz(p)	SpMaxA_A
SM5_Dz(p)	VE3_H2
SM6_Dz(p)	Eig03_AEA(ri)
VE1_Dz(p)	SpMaxA_AEA(bo)
VE2_Dz(p)	SpPosLog_Dz(e)
VE3_Dz(p)	SpPosLog_X
VE1sign_Dz(p)	Eig04_AEA(ed)
VE2sign_Dz(p)	EE_X
VR1_Dz(p)	Eig03_EA
VR2_Dz(p)	SM11_AEA(bo)
VR3_Dz(p)	Eig12_AEA(ri)
Wi_Dz(i)	MWC09
WiA_Dz(i)	SpDiam_B(v)
AVS_Dz(i)	SaasC
H_Dz(i)	SpPosA_B(i)
Chi_Dz(i)	SAacc
ChiA_Dz(i)	SM6_H2
J_Dz(i)	VAR
HyWi_Dz(i)	ATSC1e
SpAbs_Dz(i)	SpPosLog_Dz(v)
SpPos_Dz(i)	Eig03_EA(ri)
SpPosA_Dz(i)	ATS4m
SpPosLog_Dz(i)	Chi0_EA(ed)
SpMax_Dz(i)	C%
SpMaxA_Dz(i)	TWC
SpDiam_Dz(i)	s3_relPathLength
SpAD_Dz(i)	Ho_D
SpMAD_Dz(i)	SpMax4_Bh(m)
Ho_Dz(i)	SpMax_B(i)
SM1_Dz(i)	SpPosLog_Dz(m)
SM2_Dz(i)	SpPosLog_Dz(Z)
SM3_Dz(i)	SpPosLog_Dz(p)
SM4_Dz(i)	WiA_H2
SM5_Dz(i)	Wi_Dz(i)
SM6_Dz(i)	SpPos_X
VE1_Dz(i)	SpAD_X
VE2_Dz(i)	SpMAD_B(v)
VE3_Dz(i)	SpMax7_Bh(m)
VE1sign_Dz(i)	GD
VE2sign_Dz(i)	nCIR
VR1_Dz(i)	HDcpx
VR2_Dz(i)	Ho_X
VR3_Dz(i)	SpMax_B(m)
Wi_B(m)	CATS2D_02_DA
WiA_B(m)	SM03_EA
AVS_B(m)	MWC10
Chi_B(m)	Eta_R
ChiA_B(m)	VE2_H2
J_B(m)	CATS2D_07_DL
HyWi_B(m)	Wi_Dz(e)
SpAbs_B(m)	SM2_X
SpPos_B(m)	ON1
SpPosA_B(m)	SpMAD_B(e)
SpPosLog_B(m)	CATS2D_04_DL
SpMax_B(m)	s3_relSize
SpMaxA_B(m)	Eig05_EA(ri)
SpDiam_B(m)	Eta_B
SpAD_B(m)	SpDiam_Dz(i)
SpMAD_B(m)	SM04_EA(ri)
Ho_B(m)	SpMAD_B(i)
EE_B(m)	VE3_A
SM1_B(m)	SM04_AEA(ed)
SM2_B(m)	SpMax3_Bh(p)
SM3_B(m)	Qtot
SM4_B(m)	Qneg
SM5_B(m)	Qpos
SM6_B(m)	s2_relSize
Wi_B(v)	CENT
WiA_B(v)	HyWi_Dz(i)
AVS_B(v)	SpMax_B(e)
Chi_B(v)	F10[C-C]
ChiA_B(v)	SpDiam_Dz(e)
J_B(v)	SM2_Dz(i)
HyWi_B(v)	nCb-
SpAbs_B(v)	SpPosLog_D/Dt
SpPos_B(v)	Wi_Dz(v)
SpPosA_B(v)	SpPosA_B(p)
SpPosLog_B(v)	AVS_Dz(i)
SpMax_B(v)	SM4_Dz(i)
SpMaxA_B(v)	ChiA_Dz(i)
SpDiam_B(v)	SpDiam_B(e)
SpAD_B(v)	SpMax3_Bh(v)
SpMAD_B(v)	SM6_Dz(i)
Ho_B(v)	SM03_EA(ri)
EE_B(v)	VE2_Dz(p)
SM1_B(v)	GATS1i
SM2_B(v)	SpMax_Dz(i)
SM3_B(v)	HyWi_Dz(e)
SM4_B(v)	nCs
SM5_B(v)	SpAbs_Dz(i)
SM6_B(v)	SM5_Dz(i)
Wi_B(e)	SpAD_Dz(i)
WiA_B(e)	SpPos_Dz(i)
AVS_B(e)	NsssCH
Chi_B(e)	CATS2D_03_LL
ChiA_B(e)	SM2_Dz(e)
J_B(e)	VE2_D
HyWi_B(e)	Chi_B(i)
SpAbs_B(e)	F09[N-O]
SpPos_B(e)	SpMax1_Bh(m)
SpPosA_B(e)	VE2_Dz(m)
SpPosLog_B(e)	VE2_Dz(Z)
SpMax_B(e)	Eta_epsi_A
SpMaxA_B(e)	SM4_X
SpDiam_B(e)	ON0
SpAD_B(e)	SpMax5_Bh(p)
SpMAD_B(e)	SpMax_B(p)
Ho_B(e)	Chi_B(e)
EE_B(e)	ATS8m
SM1_B(e)	AVS_Dz(e)
SM2_B(e)	SpMaxA_B(e)
SM3_B(e)	SM4_Dz(e)
SM4_B(e)	Wi_Dz(Z)
SM5_B(e)	Wi_Dz(m)
SM6_B(e)	SM3_Dz(i)
Wi_B(p)	SpMaxA_B(i)
WiA_B(p)	ChiA_Dz(e)
AVS_B(p)	P_VSA_charge_10
Chi_B(p)	J_Dt
ChiA_B(p)	Chi_B(v)
J_B(p)	SpDiam_B(i)
HyWi_B(p)	SM6_Dz(e)
SpAbs_B(p)	SpMax5_Bh(v)
SpPos_B(p)	J_Dz(i)
SpPosA_B(p)	P_VSA_e_3
SpPosLog_B(p)	P_VSA_charge_7
SpMax_B(p)	GGI8
SpMaxA_B(p)	nHDon
SpDiam_B(p)	SpMax_Dz(e)
SpAD_B(p)	SM5_Dz(e)
SpMAD_B(p)	PDI
Ho_B(p)	Q2
EE_B(p)	SpMaxA_B(v)
SM1_B(p)	VE2_Dz(v)
SM2_B(p)	SpAD_Dz(e)
SM3_B(p)	Wi_Dz(p)
SM4_B(p)	SpPos_Dz(e)
SM5_B(p)	SpAbs_Dz(e)
SM6_B(p)	CATS2D_00_DD
Wi_B(i)	Chi_B(p)
WiA_B(i)	SpDiam_Dz(v)
AVS_B(i)	SM3_Dz(e)
Chi_B(i)	ATS7m
ChiA_B(i)	CATS2D_08_DL
J_B(i)	F02[C-C]
HyWi_B(i)	VE2_Dz(i)
SpAbs_B(i)	H-050
SpPos_B(i)	GGI4
SpPosA_B(i)	WiA_B(i)
SpPosLog_B(i)	Eta_D_epsiA
SpMax_B(i)	Hy
SpMaxA_B(i)	s4_relPathLength_2
SpDiam_B(i)	VE2_Dz(e)
SpAD_B(i)	WiA_B(e)
SpMAD_B(i)	Chi_B(m)
Ho_B(i)	HyWi_Dz(v)
EE_B(i)	P_VSA_ppp_A
SM1_B(i)	F01[C-C]
SM2_B(i)	SpMax8_Bh(m)
SM3_B(i)	SM05_AEA(ed)
SM4_B(i)	SM2_Dz(v)
SM5_B(i)	SpMaxA_B(p)
SM6_B(i)	GGI6
ATS1m	SHED_DA
ATS2m	SM06_EA
ATS3m	ringChiralCenter
ATS4m	SM4_Dz(v)
ATS5m	ChiA_Dz(v)
ATS6m	AVS_Dz(v)
ATS7m	SM6_Dz(v)
ATS8m	SM1_Dz(e)
ATS1v	SpMax_Dz(v)
ATS2v	nLevel3
ATS3v	SpAD_Dz(v)
ATS4v	nLevel4
ATS5v	SpPos_Dz(v)
ATS6v	SM5_Dz(v)
ATS7v	SpAbs_Dz(v)
ATS8v	SM05_EA
ATS1e	SM6_X
ATS2e	WiA_B(v)
ATS3e	SpDiam_Dz(m)
ATS4e	nLevel5
ATS5e	SpDiam_Dz(Z)
ATS6e	D/Dtr06
ATS7e	TI2_L
ATS8e	J_Dz(e)
ATS1p	GGI3
ATS2p	s3_size
ATS3p	HyWi_Dz(m)
ATS4p	HyWi_Dz(Z)
ATS5p	SM3_Dz(v)
ATS6p	SpPosA_B(m)
ATS7p	s3_pathLength
ATS8p	s2_relPathLength
ATS1i	SAdon
ATS2i	P_VSA_ppp_D
ATS3i	SpDiam_EA(bo)
ATS4i	SpMax_B(v)
ATS5i	nLevel1
ATS6i	CATS2D_09_AA
ATS7i	VE2_Dt
ATS8i	SpMax3_Bh(e)
ATSC1m	SM2_Dz(m)
ATSC2m	SpMin2_Bh(i)
ATSC3m	SM2_Dz(Z)
ATSC4m	Chi0_EA(bo)
ATSC5m	P_VSA_LogP_6
ATSC6m	CATS2D_09_DA
ATSC7m	Ho_Dz(i)
ATSC8m	P_VSA_i_4
ATSC1v	F09[C-C]
ATSC2v	ATS1v
ATSC3v	s3_relPathLength_2
ATSC4v	SM4_Dz(m)
ATSC5v	SM4_Dz(Z)
ATSC6v	AVS_Dz(m)
ATSC7v	AVS_Dz(Z)
ATSC8v	nLevel2
ATSC1e	SssCH2
ATSC2e	nC
ATSC3e	CATS2D_00_LL
ATSC4e	SpMaxA_AEA(dm)
ATSC5e	SM6_Dz(m)
ATSC6e	SM6_Dz(Z)
ATSC7e	SpPos_Dz(m)
ATSC8e	P_VSA_LogP_3
ATSC1p	SpPos_Dz(Z)
ATSC2p	SpMax_Dz(m)
ATSC3p	SpMax_Dz(Z)
ATSC4p	SpDiam_Dz(p)
ATSC5p	SM5_Dz(Z)
ATSC6p	SM5_Dz(m)
ATSC7p	SpAD_Dz(m)
ATSC8p	SpAD_Dz(Z)
ATSC1i	ChiA_Dz(m)
ATSC2i	ChiA_Dz(Z)
ATSC3i	nDB
ATSC4i	WiA_B(p)
ATSC5i	ATS5m
ATSC6i	SpAbs_Dz(m)
ATSC7i	SpAbs_Dz(Z)
ATSC8i	HyWi_Dz(p)
MATS1m	MaxssCH2
MATS2m	P_VSA_s_5
MATS3m	SM3_Dz(m)
MATS4m	SM3_Dz(Z)
MATS5m	F09[C-N]
MATS6m	ATS6m
MATS7m	SM2_Dz(p)
MATS8m	s2_size
MATS1v	Wi_D/Dt
MATS2v	Ho_Dz(e)
MATS3v	SM12_AEA(dm)
MATS4v	Eig03_EA(ed)
MATS5v	s2_relPathLength_2
MATS6v	SM4_Dz(p)
MATS7v	F10[C-N]
MATS8v	SM6_Dz(p)
MATS1e	SpAD_Dz(p)
MATS2e	SpMax_Dz(p)
MATS3e	AVS_Dz(p)
MATS4e	SM5_Dz(p)
MATS5e	SM11_AEA(ri)
MATS6e	Eig01_EA(bo)
MATS7e	SpMax_EA(bo)
MATS8e	SpPos_Dz(p)
MATS1p	ChiA_Dz(p)
MATS2p	SpAbs_Dz(p)
MATS3p	WiA_B(m)
MATS4p	nLevel6
MATS5p	s4_phRelSize_2
MATS6p	SM3_Dz(p)
MATS7p	SPI
MATS8p	SpMax5_Bh(e)
MATS1i	nHAcc
MATS2i	CATS2D_02_DL
MATS3i	CATS2D_03_AL
MATS4i	SM06_EA(ri)
MATS5i	SpMaxA_EA(bo)
MATS6i	SM06_AEA(ed)
MATS7i	nBnz
MATS8i	SM05_EA(ri)
GATS1m	VE2_D/Dt
GATS2m	F06[C-N]
GATS3m	T(O..O)
GATS4m	P_VSA_s_4
GATS5m	B09[N-O]
GATS6m	GATS1m
GATS7m	Ho_Dz(v)
GATS8m	P_VSA_charge_1
GATS1v	ChiralCenter
GATS2v	SpMax4_Bh(p)
GATS3v	CATS2D_07_AL
GATS4v	ATS1p
GATS5v	GGI2
GATS6v	SIC5
GATS7v	ARR
GATS8v	CATS2D_09_DL
GATS1e	J_X
GATS2e	s3_phRelSize
GATS3e	F03[C-S]
GATS4e	SpMaxA_B(m)
GATS5e	NssCH2
GATS6e	SpMax4_Bh(v)
GATS7e	s4_relPathLength
GATS8e	AP
GATS1p	SpMax1_Bh(e)
GATS2p	SIC1
GATS3p	GATS8i
GATS4p	s2_pathLength
GATS5p	ATS2v
GATS6p	J_D/Dt
GATS7p	C-002
GATS8p	s34_phRelSize
GATS1i	WiA_Dz(i)
GATS2i	VvdwMG
GATS3i	Vx
GATS4i	DELS
GATS5i	F06[C-S]
GATS6i	SpMax6_Bh(v)
GATS7i	F07[C-N]
GATS8i	SpMaxA_Dz(i)
GGI1	s34_relSize
GGI2	SM07_EA
GGI3	GGI5
GGI4	SpMAD_Dz(i)
GGI5	HyWi_D/Dt
GGI6	SpPosA_Dz(i)
GGI7	GGI7
GGI8	s4_phRelSize
GGI9	SpMin2_Bh(e)
GGI10	SpMax1_Bh(p)
JGI1	D/Dtr05
JGI2	SM08_EA
JGI3	S1K
JGI4	T(O..S)
JGI5	SpMax4_Bh(e)
JGI6	SHED_DD
JGI7	F07[C-S]
JGI8	SHED_AL
JGI9	s4_relSize
JGI10	IC0
JGT	AAC
SpMax1_Bh(m)	SM03_EA(ed)
SpMax2_Bh(m)	SIC4
SpMax3_Bh(m)	chiralPhMoment
SpMax4_Bh(m)	P_VSA_LogP_5
SpMax5_Bh(m)	Eig03_AEA(ed)
SpMax6_Bh(m)	SpMax6_Bh(p)
SpMax7_Bh(m)	Eig03_AEA(dm)
SpMax8_Bh(m)	SpMax1_Bh(v)
SpMax1_Bh(v)	RNCG
SpMax2_Bh(v)	SpMax5_Bh(i)
SpMax3_Bh(v)	Ho_Dz(p)
SpMax4_Bh(v)	P_VSA_charge_8
SpMax5_Bh(v)	T(N..N)
SpMax6_Bh(v)	F05[N-N]
SpMax7_Bh(v)	Sv
SpMax8_Bh(v)	WiA_Dz(e)
SpMax1_Bh(e)	CATS2D_04_DA
SpMax2_Bh(e)	SHED_AA
SpMax3_Bh(e)	SpMax3_Bh(i)
SpMax4_Bh(e)	SM07_AEA(ed)
SpMax5_Bh(e)	F10[N-O]
SpMax6_Bh(e)	J_Dz(v)
SpMax7_Bh(e)	B07[C-S]
SpMax8_Bh(e)	meanDistFromCC
SpMax1_Bh(p)	maxDistfromCC
SpMax2_Bh(p)	CIC5
SpMax3_Bh(p)	LDI
SpMax4_Bh(p)	J_A
SpMax5_Bh(p)	s4_pathLength
SpMax6_Bh(p)	CATS2D_09_LL
SpMax7_Bh(p)	s4_numRotBonds
SpMax8_Bh(p)	SM04_EA(ed)
SpMax1_Bh(i)	TIC1
SpMax2_Bh(i)	s4_phSize
SpMax3_Bh(i)	s34_phSize
SpMax4_Bh(i)	IC2
SpMax5_Bh(i)	SpMaxA_Dz(e)
SpMax6_Bh(i)	CATS2D_00_AA
SpMax7_Bh(i)	SpMAD_Dz(e)
SpMax8_Bh(i)	SpPosA_Dz(e)
SpMin1_Bh(m)	J_H2
SpMin2_Bh(m)	VvdwZAZ
SpMin3_Bh(m)	chiralMoment
SpMin4_Bh(m)	nS
SpMin5_Bh(m)	C-026
SpMin6_Bh(m)	P_VSA_charge_6
SpMin7_Bh(m)	MDEN-22
SpMin8_Bh(m)	ATSC2e
SpMin1_Bh(v)	MATS1v
SpMin2_Bh(v)	NssNH
SpMin3_Bh(v)	s4_size
SpMin4_Bh(v)	CATS2D_03_DL
SpMin5_Bh(v)	Ho_Dz(m)
SpMin6_Bh(v)	T(N..S)
SpMin7_Bh(v)	SHED_LL
SpMin8_Bh(v)	Ho_Dz(Z)
SpMin1_Bh(e)	C-024
SpMin2_Bh(e)	nR06
SpMin3_Bh(e)	P_VSA_ppp_ter
SpMin4_Bh(e)	VE2sign_Dz(e)
SpMin5_Bh(e)	Qmean
SpMin6_Bh(e)	B06[C-S]
SpMin7_Bh(e)	SpMax4_Bh(i)
SpMin8_Bh(e)	SpDiam_D/Dt
SpMin1_Bh(p)	F08[C-S]
SpMin2_Bh(p)	RPCG
SpMin3_Bh(p)	SIC3
SpMin4_Bh(p)	s34_size
SpMin5_Bh(p)	P_VSA_MR_7
SpMin6_Bh(p)	minsssN
SpMin7_Bh(p)	B03[C-S]
SpMin8_Bh(p)	SpMin6_Bh(i)
SpMin1_Bh(i)	CIC4
SpMin2_Bh(i)	nLevel7
SpMin3_Bh(i)	F01[C-S]
SpMin4_Bh(i)	CATS2D_05_DA
SpMin5_Bh(i)	P_VSA_charge_5
SpMin6_Bh(i)	s3_phRelSize_2
SpMin7_Bh(i)	SpAD_D/Dt
SpMin8_Bh(i)	SpPos_D/Dt
P_VSA_LogP_1	CATS2D_04_AL
P_VSA_LogP_2	Chi1_EA(bo)
P_VSA_LogP_3	ATS2p
P_VSA_LogP_4	SpMin3_Bh(i)
P_VSA_LogP_5	F06[C-O]
P_VSA_LogP_6	SpMax1_Bh(i)
P_VSA_LogP_7	SpMax6_Bh(e)
P_VSA_LogP_8	F04[N-O]
P_VSA_MR_1	phLevel1
P_VSA_MR_2	VE2sign_Dz(i)
P_VSA_MR_3	P_VSA_i_1
P_VSA_MR_4	CATS2D_02_LL
P_VSA_MR_5	H_Dt
P_VSA_MR_6	Ho_D/Dt
P_VSA_MR_7	F04[O-S]
P_VSA_MR_8	P_VSA_charge_9
P_VSA_m_1	CATS2D_07_DA
P_VSA_m_2	SM1_Dz(v)
P_VSA_m_3	SM07_EA(ri)
P_VSA_m_4	Me
P_VSA_m_5	Uindex
P_VSA_v_1	B04[O-S]
P_VSA_v_2	B08[C-S]
P_VSA_v_3	Chi_Dz(i)
P_VSA_v_4	F02[N-N]
P_VSA_e_1	F05[C-S]
P_VSA_e_2	CATS2D_05_AL
P_VSA_e_3	MaxsssN
P_VSA_e_4	VE1_H2
P_VSA_e_5	nO
P_VSA_e_6	SpMin5_Bh(i)
P_VSA_p_1	NaaCH
P_VSA_p_2	H-052
P_VSA_p_3	CATS2D_06_AL
P_VSA_p_4	SM1_Dz(i)
P_VSA_i_1	MATS1p
P_VSA_i_2	B05[C-S]
P_VSA_i_3	B01[C-S]
P_VSA_i_4	F04[C-S]
P_VSA_s_1	BIC1
P_VSA_s_2	nN
P_VSA_s_3	SM08_AEA(ed)
P_VSA_s_4	Eta_epsi
P_VSA_s_5	SM08_EA(ri)
P_VSA_s_6	s3_phSize
P_VSA_ppp_L	P_VSA_LogP_4
P_VSA_ppp_P	F04[C-N]
P_VSA_ppp_N	F02[C-S]
P_VSA_ppp_D	B02[N-S]
P_VSA_ppp_A	SpMax_H2
P_VSA_ppp_ar	J_B(i)
P_VSA_ppp_con	D/Dtr09
P_VSA_ppp_hal	SM09_EA
P_VSA_ppp_cyc	J_B(e)
P_VSA_ppp_ter	Sp
P_VSA_charge_1	CATS2D_07_AA
P_VSA_charge_2	SM2_D/Dt
P_VSA_charge_3	CIC3
P_VSA_charge_4	J_Dz(m)
P_VSA_charge_5	J_Dz(Z)
P_VSA_charge_6	CATS2D_05_DL
P_VSA_charge_7	B10[N-O]
P_VSA_charge_8	F02[N-S]
P_VSA_charge_9	F09[C-O]
P_VSA_charge_10	F09[C-S]
P_VSA_charge_11	VE1sign_D/Dt
P_VSA_charge_12	MATS1i
P_VSA_charge_13	J_B(v)
P_VSA_charge_14	B09[C-S]
Eta_alpha	SM1_Dz(p)
Eta_alpha_A	nHM
Eta_epsi	GATS2v
Eta_epsi_A	SM4_D/Dt
Eta_betaS	Eta_D_epsiD
Eta_betaS_A	EE_D/Dt
Eta_betaP	SM6_D/Dt
Eta_betaP_A	SpMax_D/Dt
Eta_beta	SM5_D/Dt
Eta_beta_A	Chi_Dz(e)
Eta_C	B04[C-S]
Eta_C_A	SM3_D/Dt
Eta_L	J_B(p)
Eta_L_A	F08[C-O]
Eta_R	C-034
Eta_F	J_B(m)
Eta_F_A	SM10_EA
Eta_LR	NdsCH
Eta_FL	WiA_Dz(v)
Eta_FL_A	P_VSA_MR_8
Eta_B	AVS_D/Dt
Eta_B_A	F04[C-C]
Eta_sh_p	NRS
Eta_sh_y	AVS_H2
Eta_sh_x	CATS2D_04_LL
Eta_D_AlphaA	Eig02_EA
Eta_D_AlphaB	SM10_AEA(bo)
Eta_epsi_2	SpMax7_Bh(v)
Eta_epsi_3	C-008
Eta_epsi_4	Eta_C_A
Eta_epsi_5	P_VSA_e_5
Eta_D_epsiA	SpMin4_Bh(i)
Eta_D_epsiB	B05[N-N]
Eta_D_epsiC	SpMaxA_Dz(v)
Eta_D_epsiD	CATS2D_09_AL
Eta_psi1	IAC
Eta_D_psiA	TIC0
Eta_D_psiB	SpMAD_Dz(v)
Eta_D_beta	SpMax6_Bh(i)
Eta_D_beta_A	SpPosA_Dz(v)
SpMax_EA	mindsCH
SpMaxA_EA	C-041
SpDiam_EA	C-028
SpAD_EA	nCbH
SpMAD_EA	SaaCH
SpMax_EA(ed)	SdsCH
SpMaxA_EA(ed)	NdssC
SpDiam_EA(ed)	F08[C-C]
SpAD_EA(ed)	SpMax8_Bh(v)
SpMAD_EA(ed)	SpDiam_H2
SpMax_EA(bo)	P_VSA_m_4
SpMaxA_EA(bo)	ATS3v
SpDiam_EA(bo)	H-048
SpAD_EA(bo)	SpMax7_Bh(p)
SpMAD_EA(bo)	s4_numAroBonds
SpMax_EA(dm)	F03[C-C]
SpMaxA_EA(dm)	S-107
SpDiam_EA(dm)	MaxdsCH
SpAD_EA(dm)	SM09_AEA(ed)
SpMAD_EA(dm)	WiA_Dz(m)
SpMax_EA(ri)	CATS2D_04_AA
SpMaxA_EA(ri)	WiA_Dz(Z)
SpDiam_EA(ri)	CIC1
SpAD_EA(ri)	minssCH2
SpMAD_EA(ri)	ChiA_D/Dt
SpMax_AEA(ed)	phLevel3
SpMaxA_AEA(ed)	SpMax8_Bh(p)
SpDiam_AEA(ed)	N-074
SpAD_AEA(ed)	N%
SpMAD_AEA(ed)	B10[C-N]
SpMax_AEA(bo)	B02[C-S]
SpMaxA_AEA(bo)	SpMin2_Bh(p)
SpDiam_AEA(bo)	SpMin5_Bh(e)
SpAD_AEA(bo)	SpPosA_Dz(m)
SpMAD_AEA(bo)	F01[C-O]
SpMax_AEA(dm)	SssNH
SpMaxA_AEA(dm)	SpPosA_Dz(Z)
SpDiam_AEA(dm)	SpMAD_Dz(m)
SpAD_AEA(dm)	SpMAD_Dz(Z)
SpMAD_AEA(dm)	SpMaxA_Dz(m)
SpMax_AEA(ri)	SpMaxA_Dz(Z)
SpMaxA_AEA(ri)	CATS2D_01_LL
SpDiam_AEA(ri)	SpMin3_Bh(e)
SpAD_AEA(ri)	CATS2D_08_LL
SpMAD_AEA(ri)	nCconj
Chi0_EA	SpMin2_Bh(v)
Chi1_EA	SRW09
Chi0_EA(ed)	VE2sign_Dz(m)
Chi1_EA(ed)	VE2sign_Dz(Z)
Chi0_EA(bo)	nR05
Chi1_EA(bo)	F02[C-O]
Chi0_EA(dm)	F07[C-C]
Chi1_EA(dm)	SdO
Chi0_EA(ri)	P_VSA_charge_3
Chi1_EA(ri)	SpMin3_Bh(p)
Chi0_AEA(ed)	SM11_EA
Chi1_AEA(ed)	nLevel8
Chi0_AEA(bo)	VE1_A
Chi1_AEA(bo)	JGI2
Chi0_AEA(dm)	Eig02_AEA(ri)
Chi1_AEA(dm)	F07[N-O]
Chi0_AEA(ri)	phLevel2
Chi1_AEA(ri)	J_Dz(p)
SM02_EA	P_VSA_p_1
SM03_EA	P_VSA_m_3
SM04_EA	Eig02_EA(ri)
SM05_EA	GATS6i
SM06_EA	SRW07
SM07_EA	SM09_EA(ri)
SM08_EA	CATS2D_08_AL
SM09_EA	SpMin6_Bh(e)
SM10_EA	B02[N-N]
SM11_EA	CATS2D_05_LL
SM12_EA	SM02_EA(dm)
SM13_EA	CATS2D_06_DL
SM14_EA	Rbrid
SM15_EA	CATS2D_02_AL
SM02_EA(ed)	nCrt
SM03_EA(ed)	S2K
SM04_EA(ed)	Eig04_EA(dm)
SM05_EA(ed)	F03[C-O]
SM06_EA(ed)	SM10_AEA(ed)
SM07_EA(ed)	SRW05
SM08_EA(ed)	SpMin4_Bh(e)
SM09_EA(ed)	P_VSA_charge_11
SM10_EA(ed)	nRNR2
SM11_EA(ed)	CATS2D_06_DA
SM12_EA(ed)	P_VSA_s_2
SM13_EA(ed)	ATSC1m
SM14_EA(ed)	P_VSA_e_1
SM15_EA(ed)	NdO
SM02_EA(bo)	MATS1e
SM03_EA(bo)	ChiA_H2
SM04_EA(bo)	P_VSA_m_1
SM05_EA(bo)	P_VSA_v_1
SM06_EA(bo)	ATSC4e
SM07_EA(bo)	VE2sign_Dz(v)
SM08_EA(bo)	SM12_EA
SM09_EA(bo)	SM10_EA(ri)
SM10_EA(bo)	VR2_A
SM11_EA(bo)	mindssC
SM12_EA(bo)	SAtot
SM13_EA(bo)	BIC5
SM14_EA(bo)	VR2_H2
SM15_EA(bo)	VE2sign_Dt
SM02_EA(dm)	nR09
SM03_EA(dm)	MaxdO
SM04_EA(dm)	VE2sign_D
SM05_EA(dm)	ATS8v
SM06_EA(dm)	minssNH
SM07_EA(dm)	SM05_EA(ed)
SM08_EA(dm)	MaxdsN
SM09_EA(dm)	WiA_Dz(p)
SM10_EA(dm)	mindsN
SM11_EA(dm)	Chi_Dz(v)
SM12_EA(dm)	SpAD_EA(dm)
SM13_EA(dm)	MDEN-13
SM14_EA(dm)	GATS2m
SM15_EA(dm)	MDEN-12
SM02_EA(ri)	VR2_D/Dt
SM03_EA(ri)	MaxssNH
SM04_EA(ri)	VR2_Dz(p)
SM05_EA(ri)	MATS3i
SM06_EA(ri)	VR2_Dz(m)
SM07_EA(ri)	VR2_Dz(Z)
SM08_EA(ri)	VR2_Dz(v)
SM09_EA(ri)	SpMax7_Bh(e)
SM10_EA(ri)	SpMax8_Bh(e)
SM11_EA(ri)	SpMAD_Dz(p)
SM12_EA(ri)	VR2_Dz(i)
SM13_EA(ri)	SpMaxA_Dz(p)
SM14_EA(ri)	CATS2D_07_LL
SM15_EA(ri)	VR2_Dz(e)
SM02_AEA(ed)	VR2_D
SM03_AEA(ed)	SdsN
SM04_AEA(ed)	minaasC
SM05_AEA(ed)	SpPosA_Dz(p)
SM06_AEA(ed)	MAXDP
SM07_AEA(ed)	VR2_Dt
SM08_AEA(ed)	SM5_X
SM09_AEA(ed)	Chi0_EA(dm)
SM10_AEA(ed)	SpMin6_Bh(p)
SM11_AEA(ed)	C-025
SM12_AEA(ed)	SM11_AEA(ed)
SM13_AEA(ed)	ATSC7e
SM14_AEA(ed)	TIE
SM15_AEA(ed)	B10[C-O]
SM02_AEA(bo)	s3_numRotBonds
SM03_AEA(bo)	VE1sign_Dz(e)
SM04_AEA(bo)	SpMAD_AEA(dm)
SM05_AEA(bo)	GATS4p
SM06_AEA(bo)	F05[C-C]
SM07_AEA(bo)	ATS4v
SM08_AEA(bo)	F10[C-S]
SM09_AEA(bo)	mintsC
SM10_AEA(bo)	MaxtsC
SM11_AEA(bo)	StsC
SM12_AEA(bo)	nCsp
SM13_AEA(bo)	Chi_Dz(Z)
SM14_AEA(bo)	Chi_Dz(m)
SM15_AEA(bo)	nTA
SM02_AEA(dm)	VE1sign_Dz(i)
SM03_AEA(dm)	NdsN
SM04_AEA(dm)	N-068
SM05_AEA(dm)	O-058
SM06_AEA(dm)	SM06_EA(ed)
SM07_AEA(dm)	ATS3p
SM08_AEA(dm)	Eig02_EA(ed)
SM09_AEA(dm)	SM11_AEA(dm)
SM10_AEA(dm)	SM13_EA
SM11_AEA(dm)	NtsC
SM12_AEA(dm)	nTB
SM13_AEA(dm)	F07[N-N]
SM14_AEA(dm)	arLevel3
SM15_AEA(dm)	CATS2D_08_DA
SM02_AEA(ri)	GATS5e
SM03_AEA(ri)	F02[N-O]
SM04_AEA(ri)	SM04_EA(dm)
SM05_AEA(ri)	B04[N-O]
SM06_AEA(ri)	ATSC3m
SM07_AEA(ri)	SpMin7_Bh(i)
SM08_AEA(ri)	SpMin2_Bh(m)
SM09_AEA(ri)	Chi1_EA(dm)
SM10_AEA(ri)	s3_numSharedNeighbors
SM11_AEA(ri)	SsssN
SM12_AEA(ri)	ATSC1v
SM13_AEA(ri)	GATS3i
SM14_AEA(ri)	C-033
SM15_AEA(ri)	ATSC3v
Eig01_EA	Eig03_EA(dm)
Eig02_EA	F08[N-O]
Eig03_EA	SpMax_AEA(bo)
Eig04_EA	Eig01_AEA(bo)
Eig05_EA	BAC
Eig06_EA	SpMin4_Bh(p)
Eig07_EA	SM11_EA(ri)
Eig08_EA	B10[C-S]
Eig09_EA	MaxaaN
Eig10_EA	SM12_AEA(ed)
Eig11_EA	SpMin3_Bh(v)
Eig12_EA	NaaS
Eig13_EA	F01[C-N]
Eig14_EA	SM14_EA
Eig15_EA	SpMin8_Bh(i)
Eig01_EA(ed)	TIC5
Eig02_EA(ed)	SaaS
Eig03_EA(ed)	MaxaaS
Eig04_EA(ed)	BIC4
Eig05_EA(ed)	JGI7
Eig06_EA(ed)	TIC4
Eig07_EA(ed)	nH
Eig08_EA(ed)	SpDiam_A
Eig09_EA(ed)	TIC3
Eig10_EA(ed)	F05[C-O]
Eig11_EA(ed)	minaaS
Eig12_EA(ed)	gmax
Eig13_EA(ed)	CATS2D_04_PL
Eig14_EA(ed)	SaaN
Eig15_EA(ed)	NNRS
Eig01_EA(bo)	F05[N-S]
Eig02_EA(bo)	SM06_EA(dm)
Eig03_EA(bo)	Eta_sh_y
Eig04_EA(bo)	GATS7m
Eig05_EA(bo)	ATS7v
Eig06_EA(bo)	SM12_EA(ri)
Eig07_EA(bo)	ATSC2m
Eig08_EA(bo)	F05[C-N]
Eig09_EA(bo)	P_VSA_charge_2
Eig10_EA(bo)	ChiA_X
Eig11_EA(bo)	C-016
Eig12_EA(bo)	SpMin4_Bh(v)
Eig13_EA(bo)	DBI
Eig14_EA(bo)	GATS1e
Eig15_EA(bo)	SsNH2
Eig01_EA(dm)	N-073
Eig02_EA(dm)	RCI
Eig03_EA(dm)	RFD
Eig04_EA(dm)	GATS2i
Eig05_EA(dm)	s3_numAroBonds
Eig06_EA(dm)	MDEO-22
Eig07_EA(dm)	SpMax7_Bh(i)
Eig08_EA(dm)	B05[N-S]
Eig09_EA(dm)	s2_phRelSize
Eig10_EA(dm)	CATS2D_03_DA
Eig11_EA(dm)	MATS1m
Eig12_EA(dm)	CATS2D_00_PP
Eig13_EA(dm)	P_VSA_ppp_P
Eig14_EA(dm)	SpPosA_L
Eig15_EA(dm)	SM15_EA
Eig01_EA(ri)	ATSC2v
Eig02_EA(ri)	SM13_AEA(ed)
Eig03_EA(ri)	Eta_epsi_3
Eig04_EA(ri)	MDEO-11
Eig05_EA(ri)	ATS8p
Eig06_EA(ri)	SM08_EA(dm)
Eig07_EA(ri)	GATS4v
Eig08_EA(ri)	NaaaC
Eig09_EA(ri)	CATS2D_05_AA
Eig10_EA(ri)	nLevel9
Eig11_EA(ri)	C-040
Eig12_EA(ri)	ATS4p
Eig13_EA(ri)	MAXDN
Eig14_EA(ri)	NsNH2
Eig15_EA(ri)	CATS2D_00_DP
Eig01_AEA(ed)	Eig05_EA(dm)
Eig02_AEA(ed)	nN(CO)2
Eig03_AEA(ed)	SHED_DP
Eig04_AEA(ed)	ATS1e
Eig05_AEA(ed)	Eig02_AEA(dm)
Eig06_AEA(ed)	Eig02_AEA(ed)
Eig07_AEA(ed)	Chi_Dz(p)
Eig08_AEA(ed)	S3K
Eig09_AEA(ed)	B09[C-N]
Eig10_AEA(ed)	SM10_EA(dm)
Eig11_AEA(ed)	MaxsNH2
Eig12_AEA(ed)	N-071
Eig13_AEA(ed)	minaaaC
Eig14_AEA(ed)	MaxaaaC
Eig15_AEA(ed)	RBN
Eig01_AEA(bo)	SaaaC
Eig02_AEA(bo)	P_VSA_charge_13
Eig03_AEA(bo)	ATS5v
Eig04_AEA(bo)	SpMin5_Bh(p)
Eig05_AEA(bo)	GATS2p
Eig06_AEA(bo)	P_VSA_charge_4
Eig07_AEA(bo)	SHED_PL
Eig08_AEA(bo)	N-075
Eig09_AEA(bo)	N-070
Eig10_AEA(bo)	nArNR2
Eig11_AEA(bo)	minsNH2
Eig12_AEA(bo)	s2_numSharedNeighbors
Eig13_AEA(bo)	GATS4m
Eig14_AEA(bo)	SpMax8_Bh(i)
Eig15_AEA(bo)	CATS2D_02_AA
Eig01_AEA(dm)	NaaN
Eig02_AEA(dm)	F05[N-O]
Eig03_AEA(dm)	F06[N-N]
Eig04_AEA(dm)	BIC3
Eig05_AEA(dm)	ATSC4v
Eig06_AEA(dm)	nCt
Eig07_AEA(dm)	SIC0
Eig08_AEA(dm)	F07[C-O]
Eig09_AEA(dm)	Eta_D_AlphaB
Eig10_AEA(dm)	TIC2
Eig11_AEA(dm)	ATSC7v
Eig12_AEA(dm)	Eta_alpha_A
Eig13_AEA(dm)	N-066
Eig14_AEA(dm)	nRNH2
Eig15_AEA(dm)	SM12_EA(dm)
Eig01_AEA(ri)	ATS6v
Eig02_AEA(ri)	SM14_AEA(ed)
Eig03_AEA(ri)	SM13_EA(ri)
Eig04_AEA(ri)	nArNHR
Eig05_AEA(ri)	CATS2D_08_AP
Eig06_AEA(ri)	MATS6v
Eig07_AEA(ri)	s2_phSize
Eig08_AEA(ri)	B08[N-O]
Eig09_AEA(ri)	s2_phRelSize_2
Eig10_AEA(ri)	SM14_EA(dm)
Eig11_AEA(ri)	NssS
Eig12_AEA(ri)	RBF
Eig13_AEA(ri)	H-047
Eig14_AEA(ri)	Eig06_EA(dm)
Eig15_AEA(ri)	CATS2D_01_AA
nCp	SpDiam_EA(dm)
nCs	VE1sign_A
nCt	MATS3e
nCq	SAscore
nCrs	SHED_AP
nCrt	F04[N-N]
nCrq	B07[N-N]
nCar	B07[O-S]
nCbH	N-072
nCb-	SM07_EA(ed)
nCconj	F07[O-S]
nR=Cp	SpMax_A
nR=Cs	MATS6i
nR=Ct	CATS2D_06_LL
n=C=	GNar
nR#CH/X	VE1sign_Dz(Z)
nR#C-	VE1sign_Dz(m)
nROCN	GATS8p
nArOCN	nR#C-
nRNCO	C-022
nArNCO	F06[C-C]
nRSCN	F02[C-N]
nArSCN	GATS4e
nRNCS	C-032
nArNCS	VE2sign_Dz(p)
nRCOOH	Eig14_EA(dm)
nArCOOH	MATS5m
nRCOOR	CATS2D_04_DD
nArCOOR	Eig15_EA(dm)
nRCONH2	PHI
nArCONH2	SM14_EA(ri)
nRCONHR	JGI10
nArCONHR	MATS8i
nRCONR2	SpMin6_Bh(v)
nArCONR2	SM15_AEA(ed)
nROCON	F09[N-N]
nArOCON	NssO
nRCOX
nArCOX
nRCSOH
nArCSOH
nRCSSH
nArCSSH
nRCOSR
nArCOSR
nRCSSR
nArCSSR
nRCHO
nArCHO
nRCO
nArCO
nCONN
nC=O(O)2
nN=C-N<
nC(=N)N2
nRC=N
nArC=N
nRCNO
nArCNO
nRNH2
nArNH2
nRNHR
nArNHR
nRNR2
nArNR2
nN-N
nN=N
nRCN
nArCN
nN+
nNq
nRNHO
nArNHO
nRNNOx
nArNNOx
nRNO
nArNO
nRNO2
nArNO2
nN(CO)2
nC=N-N<
nROH
nArOH
nOHp
nOHs
nOHt
nROR
nArOR
nROX
nArOX
nO(C=O)2
nH2O
nSH
nC=S
nRSR
nRSSR
nSO
nS(=O)2
nSOH
nSOOH
nSO2OH
nSO3OH
nSO2
nSO3
nSO4
nSO2N
nPO3
nPO4
nPR3
nP(=O)O2R
nP(=O)R3/nPR5
nCH2RX
nCHR2X
nCR3X
nR=CHX
nR=CRX
nR#CX
nCHRX2
nCR2X2
nR=CX2
nCRX3
nArX
nCXr
nCXr=
nCconjX
nAziridines
nOxiranes
nThiranes
nAzetidines
nOxetanes
nThioethanes
nBeta-Lactams
nPyrrolidines
nOxolanes
ntH-Thiophenes
nPyrroles
nPyrazoles
nImidazoles
nFuranes
nThiophenes
nOxazoles
nIsoxazoles
nThiazoles
nIsothiazoles
nTriazoles
nPyridines
nPyridazines
nPyrimidines
nPyrazines
n135-Triazines
n124-Triazines
nHDon
nHAcc
C-001
C-002
C-003
C-004
C-005
C-006
C-007
C-008
C-009
C-010
C-011
C-012
C-013
C-014
C-015
C-016
C-017
C-018
C-019
C-020
C-021
C-022
C-023
C-024
C-025
C-026
C-027
C-028
C-029
C-030
C-031
C-032
C-033
C-034
C-035
C-036
C-037
C-038
C-039
C-040
C-041
C-042
C-043
C-044
H-046
H-047
H-048
H-049
H-050
H-051
H-052
H-053
H-054
H-055
O-056
O-057
O-058
O-059
O-060
O-061
O-062
O-063
Se-064
Se-065
N-066
N-067
N-068
N-069
N-070
N-071
N-072
N-073
N-074
N-075
N-076
N-077
N-078
N-079
F-081
F-082
F-083
F-084
F-085
Cl-086
Cl-087
Cl-088
Cl-089
Cl-090
Br-091
Br-092
Br-093
Br-094
Br-095
I-096
I-097
I-098
I-099
I-100
F-101
Cl-102
Br-103
I-104
S-106
S-107
S-108
S-109
S-110
Si-111
B-112
P-115
P-116
P-117
P-118
P-119
P-120
SsCH3
SdCH2
SssCH2
StCH
SdsCH
SaaCH
SsssCH
SddC
StsC
SdssC
SaasC
SaaaC
SssssC
SsNH2
SssNH
SdNH
SsssN
SdsN
SaaN
StN
SsNH3+
SssNH2+
SdNH2+
SsssNH+
SssssN+
SddsN
SaadN
SaasN
SaaNH
SsOH
SdO
SssO
SaaO
SsPH2
SssPH
SsssP
SdsssP
SddsP
SsssssP
SsSH
SdS
SssS
SaaS
SdssS
SddssS
SssssssS
SsF
SsCl
SsBr
SsI
SsLi
SssBe
SssssBe-
SsBH2
SssBH
SsssB
SssssB-
SsGeH3
SssGeH2
SsssGeH
SssssGe
SsAsH2
SssAsH
SsssAs
SsssssAs
SdsssAs
SddsAs
SsSeH
SdSe
SssSe
SaaSe
SdssSe
SssssssSe
SddssSe
SsSnH3
SssSnH2
SsssSnH
SssssSn
SsPbH3
SssPbH2
SsssPbH
SssssPb
SsSiH3
SssSiH2
SsssSiH
SssssSi
NsCH3
NdCH2
NssCH2
NtCH
NdsCH
NaaCH
NsssCH
NddC
NtsC
NdssC
NaasC
NaaaC
NssssC
NsNH2
NssNH
NdNH
NsssN
NdsN
NaaN
NtN
NsNH3+
NssNH2+
NdNH2+
NsssNH+
NssssN+
NddsN
NaadN
NaasN
NaaNH
NsOH
NdO
NssO
NaaO
NsPH2
NssPH
NsssP
NdsssP
NddsP
NsssssP
NsSH
NdS
NssS
NaaS
NdssS
NddssS
NssssssS
NsF
NsCl
NsBr
NsI
NsLi
NssBe
NssssBe-
NsBH2
NssBH
NsssB
NssssB-
NsGeH3
NssGeH2
NsssGeH
NssssGe
NsAsH2
NssAsH
NsssAs
NsssssAs
NdsssAs
NddsAs
NsSeH
NdSe
NssSe
NaaSe
NdssSe
NssssssSe
NddssSe
NsSnH3
NssSnH2
NsssSnH
NssssSn
NsPbH3
NssPbH2
NsssPbH
NssssPb
NsSiH3
NssSiH2
NsssSiH
NssssSi
minsCH3
mindCH2
minssCH2
mintCH
mindsCH
minaaCH
minsssCH
minddC
mintsC
mindssC
minaasC
minaaaC
minssssC
minsNH2
minssNH
mindNH
minsssN
mindsN
minaaN
mintN
minsNH3+
minssNH2+
mindNH2+
minsssNH+
minssssN+
minddsN
minaadN
minaasN
minaaNH
minsOH
mindO
minssO
minaaO
minsPH2
minssPH
minsssP
mindsssP
minddsP
minsssssP
minsSH
mindS
minssS
minaaS
mindssS
minddssS
minssssssS
minsF
minsCl
minsBr
minsI
minsLi
minssBe
minssssBe-
minsBH2
minssBH
minsssB
minssssB-
minsGeH3
minssGeH2
minsssGeH
minssssGe
minsAsH2
minssAsH
minsssAs
minsssssAs
mindsssAs
minddsAs
minsSeH
mindSe
minssSe
minaaSe
mindssSe
minssssssSe
minddssSe
minsSnH3
minssSnH2
minsssSnH
minssssSn
minsPbH3
minssPbH2
minsssPbH
minssssPb
minsSiH3
minssSiH2
minsssSiH
minssssSi
gmin
MaxsCH3
MaxdCH2
MaxssCH2
MaxtCH
MaxdsCH
MaxaaCH
MaxsssCH
MaxddC
MaxtsC
MaxdssC
MaxaasC
MaxaaaC
MaxssssC
MaxsNH2
MaxssNH
MaxdNH
MaxsssN
MaxdsN
MaxaaN
MaxtN
MaxsNH3+
MaxssNH2+
MaxdNH2+
MaxsssNH+
MaxssssN+
MaxddsN
MaxaadN
MaxaasN
MaxaaNH
MaxsOH
MaxdO
MaxssO
MaxaaO
MaxsPH2
MaxssPH
MaxsssP
MaxdsssP
MaxddsP
MaxsssssP
MaxsSH
MaxdS
MaxssS
MaxaaS
[truncated: 1,921 more rows]

## Sheet: 6. HIV
Supplementary Data 4. The optimal combination of descriptors of each algorithm
Bioactivity dataset 1. Biological toxicology
Descriptprs-Original (n=3764)	Descriptprs-Wilcoxon (n=1590)	Descriptprs-Spearman (n=277)	Descriptprs-RFE (XGBoost,n=162)	Descriptprs-DT (n=276)	Descriptprs-LR (n=125)	Descriptprs-RF (n=215)
MW	IC2	IC2	IC2	IC2	IC2	IC2
AMW	IC3	F05[N-O]	F05[N-O]	F05[N-O]	F05[N-O]	F05[N-O]
Sv	IDDE	Vindex	Vindex	Vindex	SHED_AL	Vindex
Se	F05[N-O]	SHED_AL	SHED_AL	SHED_AL	F08[C-N]	SHED_AL
Sp	IC4	SM6_B(v)	SM6_B(v)	SM6_B(v)	CATS2D_03_DA	SM6_B(v)
Si	Vindex	CATS2D_05_AA	F08[C-N]	CATS2D_05_AA	CATS2D_07_AL	CATS2D_05_AA
Mv	Xindex	F08[C-N]	F03[N-O]	F08[C-N]	F02[N-O]	F08[C-N]
Me	SHED_AL	F03[N-O]	P_VSA_LogP_4	F03[N-O]	MaxdO	F03[N-O]
Mp	IC5	P_VSA_LogP_4	CATS2D_03_DA	P_VSA_LogP_4	SM12_AEA(ri)	P_VSA_LogP_4
Mi	SM6_B(v)	B10[C-N]	MaxdO	B10[C-N]	gmax	B10[C-N]
GD	SM6_B(e)	CATS2D_03_DA	SM12_AEA(ri)	CATS2D_03_DA	T(N..O)	CATS2D_03_DA
nAT	Eig10_EA(bo)	B03[N-N]	gmax	B03[N-N]	SpMaxA_EA(dm)	B03[N-N]
nSK	Eig10_AEA(bo)	CATS2D_07_AL	IC1	CATS2D_07_AL	CATS2D_05_AL	CATS2D_07_AL
nAA	SM6_B(i)	F02[N-O]	T(N..O)	F02[N-O]	CATS2D_06_AL	F02[N-O]
nTA	piPC02	MaxdO	B04[N-N]	MaxdO	nLevel9	MaxdO
nBT	SM02_EA(bo)	SM12_AEA(ri)	GATS5i	SM12_AEA(ri)	JGI5	SM12_AEA(ri)
nBO	SM5_B(v)	gmax	SHED_DL	gmax	H-052	gmax
nBM	SpMax2_Bh(e)	IC1	SHED_AA	IC1	GATS5v	IC1
SCBO	SM5_B(e)	T(N..O)	CATS2D_09_DL	T(N..O)	P_VSA_LogP_2	T(N..O)
RBN	SM5_B(i)	B04[N-N]	SpMaxA_EA(dm)	B04[N-N]	CATS2D_08_AA	B04[N-N]
RBF	SM6_B(p)	GATS5i	P_VSA_charge_3	GATS5i	P_VSA_charge_12	GATS5i
nDB	SM5_B(p)	SHED_DL	P_VSA_MR_2	SHED_DL	P_VSA_LogP_5	SHED_DL
nTB	TI1_L	SHED_AA	CATS2D_05_AL	SHED_AA	nRCONHR	SHED_AA
nAB	J_D	CATS2D_09_DL	TPSA(NO)	CATS2D_09_DL	H-047	CATS2D_09_DL
nH	Eig07_AEA(bo)	SpMaxA_EA(dm)	nHet	SpMaxA_EA(dm)	MATS4e	SpMaxA_EA(dm)
nC	Eta_beta	P_VSA_charge_3	nLevel9	P_VSA_charge_3	NaasC	P_VSA_charge_3
nN	SM4_B(v)	P_VSA_MR_2	P_VSA_MR_5	P_VSA_MR_2	P_VSA_s_5	P_VSA_MR_2
nO	SM4_B(p)	CATS2D_05_AL	P_VSA_charge_9	CATS2D_05_AL	QEDu	CATS2D_05_AL
nP	SM4_B(e)	TPSA(NO)	MATS6e	TPSA(NO)	SM5_X	TPSA(NO)
nS	SM4_B(i)	CATS2D_06_AL	CATS2D_06_DL	CATS2D_06_AL	GATS4i	CATS2D_06_AL
nF	piPC03	nHet	JGI5	nHet	F05[O-O]	nHet
nCL	SpMax2_Bh(i)	nLevel9	H-052	nLevel9	NRS	nLevel9
nBR	J_Dz(i)	P_VSA_MR_5	P_VSA_s_3	P_VSA_MR_5	mindO	P_VSA_MR_5
nI	SM03_AEA(ri)	CATS2D_08_DL	SHED_DA	CATS2D_08_DL	C-008	CATS2D_08_DL
nB	Eig08_EA(ed)	B10[C-O]	GATS5v	B10[C-O]	SssNH	B10[C-O]
nHM	Eig07_EA(bo)	P_VSA_charge_9	CATS2D_03_AA	P_VSA_charge_9	SAscore	P_VSA_charge_9
nHet	SpAD_EA(bo)	nR06	SpMin2_Bh(p)	nR06	AVS_B(v)	nR06
nX	SCBO	B10[C-F]	B08[N-F]	B10[C-F]	C-026	B10[C-F]
H%	piPC01	MATS6e	P_VSA_LogP_2	MATS6e	nPyridines	MATS6e
C%	SM04_EA(bo)	CATS2D_05_DA	max_conj_path	CATS2D_05_DA	H-046	CATS2D_05_DA
N%	Eta_F	C-002	P_VSA_charge_12	C-002	SpMAD_A	C-002
O%	Eig10_EA(ed)	CATS2D_06_DL	P_VSA_charge_7	CATS2D_06_DL	GATS1e	CATS2D_06_DL
X%	SM05_AEA(ri)	JGI5	P_VSA_LogP_5	JGI5	P_VSA_charge_2	JGI5
nCsp3	Eig09_EA(bo)	H-052	H-047	H-052	Eta_sh_p	H-052
nCsp2	Eig06_AEA(bo)	P_VSA_s_3	NssCH2	P_VSA_s_3	C-006	P_VSA_s_3
nCsp	GGI10	SHED_DA	P_VSA_charge_10	SHED_DA	SpMin1_Bh(i)	SHED_DA
Fsp3	Eig08_AEA(bo)	GATS5v	MATS4e	GATS5v	C-034	GATS5v
max_conj_path	EE_B(p)	CATS2D_03_AA	NaasC	CATS2D_03_AA	F07[O-O]	CATS2D_03_AA
nStructures	Eig09_AEA(bo)	B10[C-C]	CATS2D_04_DA	B10[C-C]	GATS6e	B10[C-C]
totalcharge	SM02_AEA(bo)	SpMin2_Bh(p)	P_VSA_s_5	SpMin2_Bh(p)	SpMAD_EA(dm)	SpMin2_Bh(p)
nCIC	SM3_B(p)	B08[N-F]	CATS2D_03_AL	B08[N-F]	CATS2D_03_DL	B08[N-F]
nCIR	EE_B(v)	P_VSA_LogP_2	QEDu	P_VSA_LogP_2	P_VSA_charge_13	P_VSA_LogP_2
TRS	TIC1	B08[C-N]	VE2sign_B(p)	B08[C-N]	CATS2D_05_DL	B08[C-N]
Rperim	SM3_B(v)	max_conj_path	SM5_X	max_conj_path	C-040	max_conj_path
Rbrid	EE_B(e)	CATS2D_08_AA	MaxaaN	CATS2D_08_AA	MATS2i	CATS2D_08_AA
MCD	Eig06_EA(bo)	P_VSA_charge_12	minsOH	P_VSA_charge_12	CATS2D_02_DL	P_VSA_charge_12
RFD	ChiA_D	P_VSA_charge_7	GATS4i	P_VSA_charge_7	ESOL	P_VSA_charge_7
RCI	SM3_B(e)	P_VSA_LogP_5	Eig05_EA(dm)	P_VSA_LogP_5	CATS2D_07_AA	P_VSA_LogP_5
NRS	Eig08_EA(bo)	nRCONHR	mindO	nRCONHR	C-027	nRCONHR
NNRS	Eig07_EA(ed)	H-047	SssNH	H-047	JGI3	H-047
nSpiro	SM02_AEA(ri)	NssCH2	ChiA_X	NssCH2	gmin	NssCH2
nBridgeHead	EE_B(i)	P_VSA_charge_10	GATS7v	P_VSA_charge_10	BIC3	P_VSA_charge_10
nR03	SM15_AEA(bo)	MATS4e	SAscore	MATS4e	H-049	MATS4e
nR04	Eig07_EA	NaasC	AVS_B(v)	NaasC	MATS4v	NaasC
nR05	SM03_AEA(bo)	B07[N-O]	VE2sign_B(m)	B07[N-O]	H-048	CATS2D_04_DA
nR06	Eig07_AEA(ri)	CATS2D_04_DA	GATS4e	CATS2D_04_DA	MATS2m	P_VSA_s_5
nR07	SM3_B(i)	P_VSA_s_5	GATS3p	P_VSA_s_5	MATS7p	CATS2D_03_AL
nR08	WiA_D	B09[C-O]	JGI10	B09[C-O]	NaaNH	QEDu
nR09	SM04_AEA(ri)	CATS2D_03_AL	H-046	CATS2D_03_AL	MATS6i	VE2sign_B(p)
nR10	Eig09_EA(ed)	QEDu	SpMAD_EA(ri)	QEDu	NaasN	SM5_X
nR11	SpMax2_Bh(v)	VE2sign_B(p)	SpDiam_B(m)	VE2sign_B(p)	CATS2D_02_AL	MaxaaN
nR12	Eig06_EA	SM5_X	SpMAD_A	SM5_X	SsCH3	minsOH
nBnz	SM14_AEA(bo)	MaxaaN	GATS1e	MaxaaN	F08[O-O]	GATS4i
ARR	H_Dz(Z)	minsOH	P_VSA_charge_2	minsOH	GATS2m	Eig05_EA(dm)
AP	SM2_B(p)	GATS4i	SssCH2	GATS4i	SaasC	N-068
Pol	Eig06_EA(ed)	Eig05_EA(dm)	Eta_sh_p	Eig05_EA(dm)	CATS2D_06_DA	F05[O-O]
LPRS	SM15_AEA(dm)	N-068	GATS3m	N-068	Eta_sh_x	NRS
MSD	Eig06_AEA(ri)	F05[O-O]	P_VSA_charge_11	F05[O-O]	minaasC	mindO
SPI	MPC03	NRS	MaxssO	NRS	SpDiam_AEA(dm)	C-008
ECC	H_Dz(m)	mindO	SpMin1_Bh(i)	mindO	O-060	SssNH
AECC	Eig06_EA(ri)	C-008	F07[O-O]	C-008	SaaO	ChiA_X
DECC	SM2_B(v)	B07[N-N]	GATS6e	B07[N-N]	MATS5m	GATS7v
MDDD	Eig10_AEA(ed)	SssNH	SpMAD_EA(dm)	SssNH	F09[O-O]	SAscore
UNIP	Eig10_AEA(ri)	ChiA_X	MATS3e	ChiA_X	CATS2D_00_NN	AVS_B(v)
CENT	J_Dz(e)	B10[N-O]	CATS2D_05_DL	B10[N-O]	SpMAD_AEA(ed)	VE2sign_B(m)
VAR	Eig07_EA(ri)	GATS7v	MATS1e	GATS7v	F06[N-O]	C-026
ICR	Eig05_EA	SAscore	MATS2i	SAscore	C-025	nPyridines
MaxTD	SM13_AEA(bo)	AVS_B(v)	CATS2D_02_DL	AVS_B(v)	CATS2D_02_DA	GATS4e
MeanTD	Eig10_EA(ri)	VE2sign_B(m)	ESOL	VE2sign_B(m)	JGI8	GATS3p
MaxDD	SpMaxA_D	C-026	CATS2D_07_AA	C-026	C-032	JGI10
MeanDD	SM2_B(e)	nPyridines	F07[C-S]	nPyridines	P_VSA_s_1	H-046
Wap	Eig10_EA	GATS4e	VE1_B(e)	GATS4e	GATS6v	SpMAD_EA(ri)
S1K	SM04_AEA(dm)	GATS3p	MATS5e	GATS3p	F02[N-N]	SpDiam_B(m)
S2K	SM04_AEA(bo)	JGI10	SdssC	JGI10	CATS2D_02_AA	SpMAD_A
S3K	ChiA_Dz(i)	H-046	MaxaaaC	H-046	nArOR	B08[N-N]
PHI	IDE	SpMAD_EA(ri)	JGI3	SpMAD_EA(ri)	C-005	GATS1e
PW2	SM2_B(i)	SpDiam_B(m)	MaxddssS	SpDiam_B(m)	CATS2D_03_DD	F09[N-O]
PW3	Eig07_AEA(ed)	B08[N-O]	P_VSA_MR_7	B08[N-O]	CATS2D_09_DA	P_VSA_charge_2
PW4	MSD	SpMAD_A	gmin	SpMAD_A	minssCH2	nR10
PW5	SpAD_B(m)	B08[N-N]	BIC3	B08[N-N]	F04[N-F]	SssCH2
MAXDN	CATS2D_05_AA	GATS1e	MATS4v	GATS1e	GATS7m	Eta_sh_p
MAXDP	Eig08_AEA(ed)	F09[N-O]	B03[N-S]	F09[N-O]	C-018	C-006
DELS	SpMaxA_EA(ri)	P_VSA_charge_2	H-048	P_VSA_charge_2	CATS2D_05_LL	GATS3m
BAC	Eig05_AEA(ri)	nR10	MATS2m	nR10	MATS3i	nArX
LOC	H_Dz(e)	SssCH2	MATS7p	SssCH2	Eta_betaS_A	P_VSA_charge_11
MWC01	SpPosA_D	B06[N-N]	MATS6i	B06[N-N]	P_VSA_LogP_6	MaxssO
MWC02	SpMAD_D	Eta_sh_p	GATS8i	Eta_sh_p	MATS1v	SpMin1_Bh(i)
MWC03	H_Dz(v)	B05[N-N]	VE1_B(p)	B05[N-N]	MATS4i	CATS2D_09_AA
MWC04	Eig05_EA(ri)	C-006	CATS2D_02_AL	C-006	MATS8e	C-034
MWC05	HVcpx	GATS3m	SsCH3	GATS3m	F04[N-Cl]	F07[O-O]
MWC06	Eig11_AEA(bo)	nArX	MATS1m	nArX	MATS1i	GATS6e
MWC07	SM03_AEA(dm)	P_VSA_charge_11	nR=Cs	P_VSA_charge_11	F04[S-F]	C-043
MWC08	Eig09_EA	MaxssO	GATS2m	MaxssO	B08[C-C]	SpMAD_EA(dm)
MWC09	Eig09_AEA(ri)	SpMin1_Bh(i)	SaasC	SpMin1_Bh(i)	nRCOOH	MATS3e
MWC10	Eig09_EA(ri)	CATS2D_09_AA	CATS2D_06_DA	CATS2D_09_AA	JGI2	CATS2D_03_DL
SRW02	Eig08_EA(ri)	C-034	minaasC	C-034	SpMAD_AEA(ri)	P_VSA_charge_13
SRW03	Eig06_AEA(ed)	F07[O-O]	SpDiam_AEA(dm)	F07[O-O]	MCD	CATS2D_05_DL
SRW04	F08[C-N]	GATS6e	O-060	GATS6e	P_VSA_MR_8	MATS1e
SRW05	SpAD_B(v)	C-043	SaaO	C-043	SHED_PP	C-040
SRW06	SpAD_B(e)	SpMAD_EA(dm)	MATS5m	SpMAD_EA(dm)	CATS2D_07_DD	MATS2i
SRW07	H_Dz(p)	MATS3e	SpMAD_AEA(ed)	MATS3e	nR=Ct	NsssN
SRW08	AVS_D	CATS2D_03_DL	PW4	CATS2D_03_DL	nPyrimidines	CATS2D_02_DL
SRW09	SpAD_B(p)	P_VSA_charge_13	F06[N-O]	P_VSA_charge_13	F10[C-Cl]	ESOL
SRW10	Yindex	CATS2D_05_DL	P_VSA_charge_6	CATS2D_05_DL	GATS5e	CATS2D_07_AA
MPC01	Eig08_AEA(ri)	B09[C-C]	nCrs	B09[C-C]	MATS7i	F07[C-S]
MPC02	SpAD_B(i)	MATS1e	JGI8	MATS1e		VE1_B(e)
MPC03	Eig12_AEA(bo)	C-040	GATS6v	C-040		MATS5e
MPC04	ChiA_Dz(e)	MATS2i	P_VSA_charge_5	MATS2i		SdssC
MPC05	SpAD_AEA(dm)	NsssN	GATS3v	NsssN		MaxaaaC
MPC06	MWC03	B10[N-F]	F02[N-N]	B10[N-F]		JGI3
MPC07	TPC	CATS2D_02_DL	JGI9	CATS2D_02_DL		MaxddssS
MPC08	GGI9	B08[C-O]	CATS2D_02_AA	B08[C-O]		P_VSA_MR_7
MPC09	Wap	ESOL	GATS2i	ESOL		gmin
MPC10	H_Dz(i)	CATS2D_07_AA	C-005	CATS2D_07_AA		CATS2D_06_AA
piPC01	CATS2D_08_AL	F07[C-S]	GATS8p	F07[C-S]		H-051
piPC02	MPC04	VE1_B(e)	minssCH2	VE1_B(e)		BIC3
piPC03	HyWi_B(p)	C-027	GATS7m	C-027		MATS4v
piPC04	Chi_D	MATS5e	CATS2D_05_LL	MATS5e		B03[N-S]
piPC05	SpAbs_B(p)	SdssC	MATS3i	MaxaaaC		H-048
piPC06	SpMaxA_EA(ed)	MaxaaaC	Eta_betaS_A	JGI3		MATS2m
piPC07	SpMaxA_AEA(ri)	JGI3	P_VSA_LogP_6	MaxddssS		MATS7p
piPC08	Eig08_EA	MaxddssS	nPyrazoles	P_VSA_MR_7		nSO2N
piPC09	SM02_AEA(dm)	P_VSA_MR_7	SM11_EA(dm)	gmin		NaaNH
piPC10	Eta_FL	gmin	GATS2p	CATS2D_06_AA		MATS6i
TWC	SpMaxA_EA	CATS2D_06_AA	MATS1v	H-051		GATS8i
TPC	HyWi_B(v)	H-051	MATS4i	BIC3		VE1_B(p)
piID	SpMaxA_AEA(ed)	BIC3	MATS8e	nRSR		CATS2D_02_AL
PCR	MWC05	nRSR	MATS1i	H-049		SsCH3
PCD	Eig03_EA(bo)	H-049	arLevel3	nCt		MATS1m
CID	SM13_AEA(ri)	nCt	CATS2D_04_AL	MATS4v		nR=Cs
BID	SM05_AEA(bo)	MATS4v	minsssCH	B03[N-S]		CATS2D_07_DA
ISIZ	Eig14_AEA(bo)	B03[N-S]	JGI2	H-048		GATS2m
IAC	Eig05_EA(ed)	H-048	N%	MATS2m		SaasC
AAC	SM14_AEA(dm)	MATS2m	s2_phSize	MATS7p		CATS2D_06_DA
IDE	Eig15_AEA(bo)	MATS7p	SpMAD_AEA(ri)	nSO2N		Eta_sh_x
IDM	Ho_B(p)	nSO2N	MCD	NaaNH		minaasC
IDDE	SM2_D	NaaNH	Mi	MATS6i		SpDiam_AEA(dm)
IDDM	SpAD_AEA(bo)	MATS6i	MaxdssC	C-028		O-060
IDET	H_X	C-028	GATS5m	B03[O-S]		SaaO
IDMT	SM6_D	B03[O-S]	GATS5e	GATS8i		MATS5m
IVDE	HyWi_D	GATS8i	MATS7i	C-019		CATS2D_00_NN
IVDM	SpMax_D	C-019	GATS8v	s2_numRotBonds		SpMAD_AEA(ed)
HVcpx	MWC04	s2_numRotBonds		CATS2D_08_DA		PW4
HDcpx	Eig11_AEA(ed)	CATS2D_08_DA		VE1_B(p)		F06[N-O]
Uindex	SM4_D	VE1_B(p)		NaasN		P_VSA_charge_6
Vindex	AECC	NaasN		CATS2D_02_AL		nCrs
Xindex	SM5_D	CATS2D_02_AL		SsCH3		C-025
Yindex	WiA_Dz(i)	SsCH3		F08[O-O]		F02[C-S]
IC0	SM3_D	F08[O-O]		MATS1m		CATS2D_02_DA
IC1	SpAD_AEA(ri)	MATS1m		nR=Cs		JGI8
IC2	AVS_Dz(i)	nR=Cs		CATS2D_07_DA		C-032
IC3	SM2_B(m)	CATS2D_07_DA		GATS2m		P_VSA_s_1
IC4	SpAbs_B(v)	GATS2m		B07[C-N]		GATS6v
IC5	Wi_B(p)	B07[C-N]		B04[N-O]		P_VSA_charge_5
TIC0	Eig13_AEA(dm)	B04[N-O]		SaasC		GATS3v
TIC1	HyWi_B(e)	SaasC		CATS2D_06_DA		F02[N-N]
TIC2	SpAD_EA	CATS2D_06_DA		Eta_sh_x		JGI9
TIC3	ATS8m	Eta_sh_x		minaasC		CATS2D_02_AA
TIC4	Eig13_AEA(bo)	minaasC		SpDiam_AEA(dm)		GATS2i
TIC5	MeanTD	SpDiam_AEA(dm)		B09[N-N]		nArOR
SIC0	SpPos_A	B09[N-N]		O-060		C-005
SIC1	SpAD_A	O-060		SaaO		GATS8p
SIC2	SM03_EA(bo)	SaaO		MATS5m		minssCH2
SIC3	SM4_H2	MATS5m		B09[N-F]		nX
SIC4	Wi_D	B09[N-F]		B06[C-N]		GATS7m
SIC5	F03[N-O]	B06[C-N]		F09[O-O]		CATS2D_05_LL
CIC0	HyWi_B(i)	F09[O-O]		CATS2D_00_NN		MATS3i
CIC1	TIC2	CATS2D_00_NN		SpMAD_AEA(ed)		Eta_betaS_A
CIC2	SpAD_D	SpMAD_AEA(ed)		B01[N-N]		P_VSA_LogP_6
CIC3	SpPos_D	B01[N-N]		PW4		nPyrazoles
CIC4	CATS2D_09_AL	PW4		O-057		SM11_EA(dm)
CIC5	Ho_A	O-057		F06[N-O]		NdsN
BIC0	Ui	F06[N-O]		P_VSA_charge_6		GATS2p
BIC1	SM3_H2	P_VSA_charge_6		nCrs		MATS1v
BIC2	MPC05	nCrs		C-025		MATS4i
BIC3	SpDiam_D	C-025		F02[C-S]		MATS8e
BIC4	IDMT	F02[C-S]		CATS2D_02_DA		MATS1i
BIC5	ChiA_Dz(v)	CATS2D_02_DA		B02[N-S]		arLevel3
J_A	F06[C-N]	B02[N-S]		JGI8		CATS2D_04_AL
SpPos_A	Chi_X	JGI8		C-032		minsssCH
SpPosA_A	SpAD_EA(ri)	C-032		P_VSA_s_1		nRCOOH
SpPosLog_A	Eig12_AEA(dm)	P_VSA_s_1		GATS6v		JGI2
SpMax_A	Wi_B(v)	GATS6v		P_VSA_charge_5		N%
SpMaxA_A	Ho_B(v)	P_VSA_charge_5		B05[N-S]		s2_phSize
SpDiam_A	SpAD_EA(ed)	B05[N-S]		GATS3v		SpMAD_AEA(ri)
SpAD_A	VR1_B(v)	GATS3v		F02[N-N]		MCD
SpMAD_A	MPC10	F02[N-N]		JGI9		Mi
Ho_A	Wi_B(m)	JGI9		CATS2D_02_AA		CATS2D_04_AP
EE_A	VR1_B(m)	CATS2D_02_AA		GATS2i		nR09
Wi_D	SpPos_B(p)	GATS2i		nArOR		MaxdssC
WiA_D	SpAbs_B(m)	nArOR		C-005		GATS5m
AVS_D	SpMaxA_Dz(i)	C-005		B04[O-S]		GATS5e
H_D	MPC02	B04[O-S]		GATS8p		nCconj
Chi_D	SM02_EA	GATS8p		C-009		MATS7i
ChiA_D	SpAD_AEA(ed)	C-009		CATS2D_03_DD		GATS8v
J_D	VR1_B(p)	CATS2D_03_DD		CATS2D_09_DA
HyWi_D	ECC	CATS2D_09_DA		minssCH2
SpPos_D	SM06_AEA(bo)	minssCH2		B10[N-N]
SpPosA_D	Eig09_AEA(ed)	B10[N-N]		F04[N-F]
SpPosLog_D	Chi1_EA	F04[N-F]		nX
SpMax_D	Chi1_AEA(bo)	nX		nRCO
SpMaxA_D	Chi1_AEA(ri)	nRCO		GATS7m
SpDiam_D	Chi1_AEA(dm)	GATS7m		C-018
SpAD_D	Chi1_AEA(ed)	C-018		CATS2D_05_LL
SpMAD_D	Eig05_AEA(bo)	CATS2D_05_LL		MATS3i
Ho_D	VAR	MATS3i		Eta_betaS_A
SM2_D	Wi_B(e)	Eta_betaS_A		P_VSA_LogP_6
SM3_D	SpPos_L	P_VSA_LogP_6		B07[N-S]
SM4_D	VR1_B(e)	B07[N-S]		nPyrazoles
SM5_D	MPC01	nPyrazoles		SM11_EA(dm)
SM6_D	nBO	SM11_EA(dm)		B10[O-O]
Acon	SRW02	B10[O-O]		NdsN
QW_L	MWC01	NdsN		GATS2p
TI1_L	MWC02	GATS2p		MATS1v
TI2_L	VR1_B(i)	MATS1v		MATS4i
STN_L	HyWi_Dz(i)	MATS4i		MATS8e
SpPos_L	SpAbs_B(i)	MATS8e		F04[N-Cl]
SpPosA_L	Wi_B(i)	F04[N-Cl]		MATS1i
SpPosLog_L	SpAbs_B(e)	MATS1i		arLevel3
SpMax_L	SM2_Dz(i)	arLevel3		CATS2D_04_AL
SpMaxA_L	SRW04	CATS2D_04_AL		C-011
SpDiam_L	Wi_Dz(i)	C-011		minsssCH
SpAD_L	Chi1_EA(ri)	minsssCH		F04[S-F]
SpMAD_L	SM4_Dz(i)	F04[S-F]		B07[N-F]
Ho_L	ChiA_Dz(m)	B07[N-F]		B08[C-C]
EE_L	Eig15_AEA(ri)	B08[C-C]		nRCOOH
SM2_L	ChiA_Dz(Z)	nRCOOH		JGI2
SM3_L	SM6_Dz(i)	JGI2		CATS2D_05_PL
SM4_L	SM2_L	CATS2D_05_PL		C-007
SM5_L	SpMax_Dz(i)	C-007		N%
SM6_L	SRW06	N%		s2_phSize
AVS_X	SM5_Dz(i)	s2_phSize		B04[O-O]
H_X	AVS_Dz(e)	B04[O-O]		SpMAD_AEA(ri)
Chi_X	SpPosA_Dz(i)	SpMAD_AEA(ri)		B06[C-O]
ChiA_X	SpMAD_Dz(i)	B06[C-O]		MCD
J_X	F10[C-C]	MCD		P_VSA_MR_8
HyWi_X	SpMax5_Bh(p)	P_VSA_MR_8		nRCONR2
SpPos_X	EE_H2	nRCONR2		Mi
SpPosA_X	SM06_AEA(ri)	Mi		CATS2D_04_AP
SpPosLog_X	Eig11_EA(ed)	CATS2D_04_AP		SHED_PP
SpMax_X	SM3_Dz(i)	SHED_PP		CATS2D_07_DD
SpMaxA_X	QW_L	CATS2D_07_DD		nR=Ct
SpDiam_X	SpPos_B(v)	nR=Ct		nPyrimidines
SpAD_X	SpDiam_Dz(i)	nPyrimidines		F10[C-Cl]
SpMAD_X	LPRS	F10[C-Cl]		nR09
Ho_X	SM10_AEA(ri)	nR09		MaxdssC
EE_X	Eig15_EA(ed)	MaxdssC		B08[N-S]
SM2_X	Chi0_AEA(dm)	B08[N-S]		CATS2D_01_DA
SM3_X	Chi0_EA	CATS2D_01_DA		B05[O-S]
SM4_X	Chi0_AEA(ri)	B05[O-S]		GATS5m
SM5_X	Chi0_AEA(ed)	GATS5m		GATS5e
SM6_X	Chi0_AEA(bo)	GATS5e		nCconj
Wi_H2	WiA_Dz(e)	nCconj		MATS7i
WiA_H2	Ho_L	MATS7i		CATS2D_02_AP
AVS_H2	SpAbs_Dz(i)	CATS2D_02_AP		GATS8v
Chi_H2	SpAD_Dz(i)	GATS8v		C-033
ChiA_H2	SpMaxA_L	C-033
J_H2	SpPos_Dz(i)
HyWi_H2	Chi0_EA(ri)
SpPos_H2	SM02_EA(ri)
SpPosA_H2	Eig14_EA(bo)
SpPosLog_H2	Eig12_EA(bo)
SpMax_H2	SM15_AEA(ri)
SpMaxA_H2	Eig05_EA(bo)
SpDiam_H2	Chi_H2
SpAD_H2	SM2_H2
SpMAD_H2	Eig15_EA
Ho_H2	SM09_AEA(dm)
EE_H2	Wi_Dz(e)
SM2_H2	Eta_betaS
SM3_H2	HyWi_H2
SM4_H2	Eig14_EA(ed)
SM5_H2	SM09_AEA(ri)
SM6_H2	EE_A
Wi_Dz(Z)	Ho_B(m)
WiA_Dz(Z)	Eig11_EA(bo)
AVS_Dz(Z)	SpPos_H2
H_Dz(Z)	SpAD_H2
Chi_Dz(Z)	SM13_AEA(dm)
ChiA_Dz(Z)	Eig04_EA(ed)
J_Dz(Z)	Eig14_AEA(ri)
HyWi_Dz(Z)	Ho_B(i)
SpAbs_Dz(Z)	Ho_B(e)
SpPos_Dz(Z)	piID
SpPosA_Dz(Z)	SpAD_X
SpPosLog_Dz(Z)	SpPos_X
SpMax_Dz(Z)	Eig14_EA
SpMaxA_Dz(Z)	SM08_AEA(dm)
SpDiam_Dz(Z)	SM5_H2
SpAD_Dz(Z)	Wi_H2
SpMAD_Dz(Z)	MWC06
Ho_Dz(Z)	MPC09
SM1_Dz(Z)	Eig13_EA(bo)
SM2_Dz(Z)	SM05_AEA(dm)
SM3_Dz(Z)	Eig11_EA
SM4_Dz(Z)	IDM
SM5_Dz(Z)	Ho_H2
SM6_Dz(Z)	Eig14_EA(ri)
Wi_Dz(m)	SM3_L
WiA_Dz(m)	SM4_Dz(e)
AVS_Dz(m)	SpMax_Dz(e)
H_Dz(m)	MPC08
Chi_Dz(m)	HyWi_Dz(e)
ChiA_Dz(m)	SM6_Dz(e)
J_Dz(m)	HyWi_B(m)
HyWi_Dz(m)	SpPos_B(m)
SpAbs_Dz(m)	SM5_Dz(e)
SpPos_Dz(m)	H_D
SpPosA_Dz(m)	SpMax4_Bh(v)
SpPosLog_Dz(m)	SM3_Dz(e)
SpMax_Dz(m)	SpMax4_Bh(p)
SpMaxA_Dz(m)	SM2_Dz(e)
SpDiam_Dz(m)	SpMaxA_Dz(e)
SpAD_Dz(m)	IDDM
SpMAD_Dz(m)	HDcpx
Ho_Dz(m)	piPC04
SM1_Dz(m)	MaxDD
SM2_Dz(m)	IVDM
SM3_Dz(m)	Eig12_AEA(ed)
SM4_Dz(m)	Eig15_EA(ri)
SM5_Dz(m)	CID
SM6_Dz(m)	ChiA_Dz(p)
Wi_Dz(v)	Eig11_EA(ri)
WiA_Dz(v)	SpPos_B(i)
AVS_Dz(v)	SpPos_B(e)
H_Dz(v)	P_VSA_LogP_4
Chi_Dz(v)	Eig11_AEA(ri)
ChiA_Dz(v)	Eta_LR
J_Dz(v)	F07[C-N]
HyWi_Dz(v)	SpMaxA_AEA(bo)
SpAbs_Dz(v)	Chi1_EA(ed)
SpPos_Dz(v)	SpAbs_Dz(e)
SpPosA_Dz(v)	B05[N-O]
SpPosLog_Dz(v)	SpPosLog_D
SpMax_Dz(v)	SpAD_Dz(e)
SpMaxA_Dz(v)	SpPos_Dz(e)
SpDiam_Dz(v)	SM02_AEA(ed)
SpAD_Dz(v)	SpDiam_Dz(e)
SpMAD_Dz(v)	VE2_B(p)
Ho_Dz(v)	Chi0_EA(ed)
SM1_Dz(v)	SpMAD_Dz(e)
SM2_Dz(v)	SpPosA_Dz(e)
SM3_Dz(v)	SpPosLog_A
SM4_Dz(v)	SpMax5_Bh(m)
SM5_Dz(v)	SpMin3_Bh(v)
SM6_Dz(v)	SM07_AEA(bo)
Wi_Dz(e)	VR3_B(m)
WiA_Dz(e)	SpMax5_Bh(v)
AVS_Dz(e)	SpPosLog_Dz(i)
H_Dz(e)	VR3_B(v)
Chi_Dz(e)	MWC07
ChiA_Dz(e)	Wi_Dz(v)
J_Dz(e)	SpMin3_Bh(i)
HyWi_Dz(e)	J_Dz(v)
SpAbs_Dz(e)	Eig15_EA(bo)
SpPos_Dz(e)	MDDD
SpPosA_Dz(e)	VR3_B(p)
SpPosLog_Dz(e)	SpPosLog_B(p)
SpMax_Dz(e)	VR3_B(e)
SpMaxA_Dz(e)	Eig04_EA
SpDiam_Dz(e)	SM12_AEA(bo)
SpAD_Dz(e)	SM08_AEA(ri)
SpMAD_Dz(e)	Eig13_EA(ed)
Ho_Dz(e)	Eta_alpha
SM1_Dz(e)	VR3_B(i)
SM2_Dz(e)	SpPosLog_B(v)
SM3_Dz(e)	AVS_Dz(v)
SM4_Dz(e)	SpMax3_Bh(e)
SM5_Dz(e)	SpPosLog_L
SM6_Dz(e)	SpPosLog_H2
Wi_Dz(p)	Eig12_EA(ed)
WiA_Dz(p)	SM07_AEA(ri)
AVS_Dz(p)	SpPosLog_Dz(e)
H_Dz(p)	SpPosLog_X
Chi_Dz(p)	Pol
ChiA_Dz(p)	SRW08
J_Dz(p)	HyWi_X
HyWi_Dz(p)	Wi_Dz(m)
SpAbs_Dz(p)	Wi_Dz(Z)
SpPos_Dz(p)	Eig14_AEA(dm)
SpPosA_Dz(p)	Eig05_AEA(ed)
SpPosLog_Dz(p)	GGI8
SpMax_Dz(p)	SpPosLog_B(i)
SpMaxA_Dz(p)	SM1_B(p)
SpDiam_Dz(p)	Ho_D
SpAD_Dz(p)	UNIP
SpMAD_Dz(p)	Chi_B(e)
Ho_Dz(p)	SpPosLog_B(m)
SM1_Dz(p)	Chi_B(i)
SM2_Dz(p)	TIC3
SM3_Dz(p)	SpPosLog_B(e)
SM4_Dz(p)	AVS_Dz(m)
SM5_Dz(p)	AVS_Dz(Z)
SM6_Dz(p)	Chi_B(m)
Wi_Dz(i)	Eig04_AEA(ri)
WiA_Dz(i)	SM1_B(v)
AVS_Dz(i)	CENT
H_Dz(i)	SpMax3_Bh(v)
Chi_Dz(i)	Eig13_AEA(ed)
ChiA_Dz(i)	Ho_X
J_Dz(i)	Eig15_AEA(ed)
HyWi_Dz(i)	SM05_EA(bo)
SpAbs_Dz(i)	B10[C-N]
SpPos_Dz(i)	VE2_B(v)
SpPosA_Dz(i)	SpPosLog_Dz(m)
SpPosLog_Dz(i)	MaxTD
SpMax_Dz(i)	SpPosLog_Dz(Z)
SpMaxA_Dz(i)	SpMin3_Bh(p)
SpDiam_Dz(i)	Chi_B(v)
SpAD_Dz(i)	SpPosLog_Dz(v)
SpMAD_Dz(i)	SM07_AEA(dm)
Ho_Dz(i)	Eig13_EA
SM1_Dz(i)	ATS1m
SM2_Dz(i)	GGI7
SM3_Dz(i)	VE2_B(m)
SM4_Dz(i)	SpMin3_Bh(e)
SM5_Dz(i)	Chi_Dz(i)
SM6_Dz(i)	nSK
Wi_B(m)	F09[C-N]
WiA_B(m)	SM06_EA(bo)
AVS_B(m)	SM4_L
Chi_B(m)	HyWi_Dz(v)
ChiA_B(m)	Chi_B(p)
J_B(m)	SpMaxA_X
HyWi_B(m)	Wi_Dz(p)
SpAbs_B(m)	Chi0_EA(bo)
SpPos_B(m)	Eig04_EA(ri)
SpPosA_B(m)	EE_X
SpPosLog_B(m)	Eig08_AEA(dm)
SpMax_B(m)	SM5_Dz(v)
SpMaxA_B(m)	SM2_Dz(v)
SpDiam_B(m)	SpMax_Dz(v)
SpAD_B(m)	SM6_Dz(v)
SpMAD_B(m)	SpMax2_Bh(p)
Ho_B(m)	SM3_Dz(v)
EE_B(m)	SpPosLog_Dz(p)
SM1_B(m)	SpMax3_Bh(i)
SM2_B(m)	SM4_Dz(v)
SM3_B(m)	Eig15_AEA(dm)
SM4_B(m)	ATS3m
SM5_B(m)	Eig14_AEA(ed)
SM6_B(m)	SpAD_L
VE1_B(m)	SM3_Dz(Z)
VE2_B(m)	SM3_Dz(m)
VE3_B(m)	HyWi_Dz(Z)
VE1sign_B(m)	HyWi_Dz(m)
VE2sign_B(m)	SM6_Dz(m)
VR1_B(m)	SpMax4_Bh(e)
VR2_B(m)	SM5_Dz(m)
VR3_B(m)	SM5_Dz(Z)
Wi_B(v)	SpMax_Dz(m)
WiA_B(v)	SM6_Dz(Z)
AVS_B(v)	SpMax_Dz(Z)
Chi_B(v)	SM4_Dz(m)
ChiA_B(v)	SM4_Dz(Z)
J_B(v)	SpPos_Dz(m)
HyWi_B(v)	SpAD_Dz(m)
SpAbs_B(v)	SM1_B(i)
SpPos_B(v)	SpPos_Dz(Z)
SpPosA_B(v)	SpAbs_Dz(m)
SpPosLog_B(v)	SM6_H2
SpMax_B(v)	SpAD_Dz(Z)
SpMaxA_B(v)	SpAbs_Dz(Z)
SpDiam_B(v)	SM3_B(m)
SpAD_B(v)	SM2_Dz(m)
SpMAD_B(v)	ATS7m
Ho_B(v)	SM2_Dz(Z)
EE_B(v)	VE3_B(e)
SM1_B(v)	SM1_B(e)
SM2_B(v)	J_Dz(Z)
SM3_B(v)	Eig13_EA(ri)
SM4_B(v)	SM06_AEA(dm)
SM5_B(v)	Eig12_EA
SM6_B(v)	SpDiam_Dz(v)
VE1_B(v)	IDET
VE2_B(v)	J_Dz(m)
VE3_B(v)	MPC06
VE1sign_B(v)	SpPos_Dz(v)
VE2sign_B(v)	SM1_B(m)
VR1_B(v)	SpAD_Dz(v)
VR2_B(v)	Eig11_AEA(dm)
VR3_B(v)	Eig10_AEA(dm)
Wi_B(e)	SpAbs_Dz(v)
WiA_B(e)	SM2_X
AVS_B(e)	BID
Chi_B(e)	Eig13_AEA(ri)
ChiA_B(e)	P_VSA_m_2
J_B(e)	SpMax4_Bh(m)
HyWi_B(e)	SM4_B(m)
SpAbs_B(e)	Eig12_AEA(ri)
SpPos_B(e)	Eig12_EA(ri)
SpPosA_B(e)	MPC07
SpPosLog_B(e)	AVS_Dz(p)
SpMax_B(e)	SpMaxA_A
SpMaxA_B(e)	IAC
SpDiam_B(e)	TIC0
SpAD_B(e)	ICR
SpMAD_B(e)	Ho_Dz(i)
Ho_B(e)	SM08_AEA(bo)
EE_B(e)	SpMaxA_H2
SM1_B(e)	ATS1v
SM2_B(e)	Eta_R
SM3_B(e)	Eig04_AEA(bo)
SM4_B(e)	VE3_B(i)
SM5_B(e)	EE_B(m)
SM6_B(e)	SpDiam_Dz(m)
VE1_B(e)	SpDiam_Dz(Z)
VE2_B(e)	ATS2v
VE3_B(e)	Chi_Dz(e)
VE1sign_B(e)	Ho_Dz(e)
VE2sign_B(e)	Eig04_AEA(ed)
VR1_B(e)	VE3_B(v)
VR2_B(e)	F10[C-O]
VR3_B(e)	HyWi_Dz(p)
Wi_B(p)	VE3_B(p)
WiA_B(p)	MW
AVS_B(p)	TIC4
Chi_B(p)	SM2_Dz(p)
ChiA_B(p)	SM4_Dz(p)
J_B(p)	SM6_Dz(p)
HyWi_B(p)	MWC08
SpAbs_B(p)	F09[C-C]
SpPos_B(p)	SM5_Dz(p)
SpPosA_B(p)	SpMax_Dz(p)
SpPosLog_B(p)	SpMax4_Bh(i)
SpMax_B(p)	VE3_B(m)
SpMaxA_B(p)	SM3_Dz(p)
SpDiam_B(p)	Eig09_AEA(dm)
SpAD_B(p)	SpDiam_Dz(p)
SpMAD_B(p)	WiA_Dz(v)
Ho_B(p)	Eig07_AEA(dm)
EE_B(p)	SRW10
SM1_B(p)	WiA_Dz(Z)
SM2_B(p)	WiA_Dz(m)
SM3_B(p)	SpPos_Dz(p)
SM4_B(p)	VE2_B(i)
SM5_B(p)	VE2_B(e)
SM6_B(p)	SpAD_Dz(p)
VE1_B(p)	WiA_H2
VE2_B(p)	WiA_B(e)
VE3_B(p)	SM5_L
VE1sign_B(p)	SM03_AEA(ed)
VE2sign_B(p)	SpMax5_Bh(e)
VR1_B(p)	GD
VR2_B(p)	ATS2p
VR3_B(p)	ATS2m
Wi_B(i)	SpAbs_Dz(p)
WiA_B(i)	WiA_B(i)
AVS_B(i)	piPC05
Chi_B(i)	ATS8v
ChiA_B(i)	EE_L
J_B(i)	F10[C-N]
HyWi_B(i)	Ho_Dz(v)
SpAbs_B(i)	CATS2D_03_DA
SpPos_B(i)	TIC5
SpPosA_B(i)	Ho_Dz(m)
SpPosLog_B(i)	MWC09
SpMax_B(i)	SpMaxA_Dz(v)
SpMaxA_B(i)	MeanDD
SpDiam_B(i)	F08[C-O]
SpAD_B(i)	SpMAD_Dz(m)
SpMAD_B(i)	SpPosA_Dz(m)
Ho_B(i)	SpPosA_Dz(Z)
EE_B(i)	SpMAD_Dz(Z)
SM1_B(i)	nCIC
SM2_B(i)	SpMaxA_Dz(Z)
SM3_B(i)	SpMaxA_Dz(m)
SM4_B(i)	Ho_Dz(Z)
SM5_B(i)	SpMaxA_B(i)
SM6_B(i)	ATS1p
VE1_B(i)	nCIR
VE2_B(i)	SpMaxA_B(v)
VE3_B(i)	SpMax3_Bh(p)
VE1sign_B(i)	MR99
VE2sign_B(i)	MRcons
VR1_B(i)	SM5_B(m)
VR2_B(i)	SM04_EA(ri)
VR3_B(i)	Sv
ATS1m	WiA_B(v)
ATS2m	SpMaxA_B(e)
ATS3m	Eig03_EA(ri)
ATS4m	Acon
ATS5m	F02[C-N]
ATS6m	SpPosA_Dz(v)
ATS7m	SM04_EA
ATS8m	Chi1_EA(bo)
ATS1v	SpMAD_Dz(v)
ATS2v	Eig03_AEA(bo)
ATS3v	F04[C-O]
ATS4v	SpMaxA_B(p)
ATS5v	WiA_B(m)
ATS6v	GGI4
ATS7v	SpMax6_Bh(m)
ATS8v	SM4_X
ATS1e	SM02_EA(ed)
ATS2e	TWC
ATS3e	AVS_H2
ATS4e	SpMax6_Bh(p)
ATS5e	TI2_L
ATS6e	SpMaxA_AEA(dm)
ATS7e	SpMax5_Bh(i)
ATS8e	Vx
ATS1p	VvdwMG
ATS2p	WiA_B(p)
ATS3p	Eig05_AEA(dm)
ATS4p	ATSC3i
ATS5p	Ho_Dz(p)
ATS6p	GGI6
ATS7p	J_Dz(p)
ATS8p	Eta_betaP
ATS1i	ATS3v
ATS2i	B03[N-N]
ATS3i	Sp
ATS4i	SM6_L
ATS5i	SpMax6_Bh(v)
ATS6i	F09[C-O]
ATS7i	Eig03_AEA(ri)
ATS8i	SpMin4_Bh(i)
ATSC1m	CATS2D_07_AL
ATSC2m	ATS8p
ATSC3m	Chi_Dz(v)
ATSC4m	ATSC8i
ATSC5m	MWC10
ATSC6m	SpMin5_Bh(i)
ATSC7m	nC
ATSC8m	Chi_Dz(m)
ATSC1v	Chi_Dz(Z)
ATSC2v	SpMax7_Bh(m)
ATSC3v	F02[N-O]
ATSC4v	MaxdO
ATSC5v	GGI2
ATSC6v	SpMin4_Bh(p)
ATSC7v	SpMaxA_EA(bo)
ATSC8v	piPC06
ATSC1e	SpMin6_Bh(i)
ATSC2e	SM6_X
ATSC3e	SpMin3_Bh(m)
ATSC4e	Eta_epsi
ATSC5e	SM6_B(m)
ATSC6e	ATS3p
ATSC7e	GGI1
ATSC8e	RBN
ATSC1p	SM14_AEA(ri)
ATSC2p	Eig04_EA(bo)
ATSC3p	WiA_Dz(p)
ATSC4p	Eig06_AEA(dm)
ATSC5p	SpMax8_Bh(m)
ATSC6p	SM11_AEA(bo)
ATSC7p	Eig03_EA
ATSC8p	piPC08
ATSC1i	ATSC3p
ATSC2i	SM12_AEA(ri)
ATSC3i	Eig02_EA(bo)
ATSC4i	SpMax3_Bh(m)
ATSC5i	ATS1e
ATSC6i	SPI
ATSC7i	piPC07
ATSC8i	F08[C-C]
MATS1m	SpMin6_Bh(e)
MATS2m	SM07_EA(bo)
MATS3m	SHED_LL
MATS4m	SpMin4_Bh(e)
MATS5m	SM04_AEA(ed)
MATS6m	SpMax8_Bh(e)
MATS7m	piPC10
MATS8m	SpMax7_Bh(p)
MATS1v	SpMin7_Bh(i)
MATS2v	gmax
MATS3v	SpMax8_Bh(i)
MATS4v	ATS3e
MATS5v	IC1
MATS6v	ATS7v
MATS7v	SpMax2_Bh(m)
MATS8v	DECC
MATS1e	nBT
MATS2e	SpMax8_Bh(v)
MATS3e	SpMaxA_Dz(p)
MATS4e	SpMax7_Bh(v)
MATS5e	SpMin5_Bh(e)
MATS6e	SpMin4_Bh(v)
MATS7e	piPC09
MATS8e	STN_L
MATS1p	SpMin7_Bh(e)
MATS2p	SpMin8_Bh(i)
MATS3p	SM08_EA(bo)
MATS4p	ATSC1i
MATS5p	SpPosA_Dz(p)
MATS6p	ATS1i
MATS7p	S1K
MATS8p	SpMin8_Bh(p)
MATS1i	SpMAD_Dz(p)
MATS2i	SpMin8_Bh(e)
MATS3i	SM03_EA(ri)
MATS4i	SpMax7_Bh(e)
MATS5i	Se
MATS6i	F01[C-C]
MATS7i	SpMax8_Bh(p)
MATS8i	Uc
GATS1m	nBM
GATS2m	T(N..N)
GATS3m	ATS3i
GATS4m	Chi_Dz(p)
GATS5m	SpMaxA_B(m)
GATS6m	SpMin5_Bh(p)
GATS7m	F07[C-C]
GATS8m	Eta_C
GATS1v	SpMax7_Bh(i)
GATS2v	SpMax6_Bh(e)
GATS3v	T(N..O)
GATS4v	ISIZ
GATS5v	nAT
GATS6v	SpMin8_Bh(v)
GATS7v	S2K
GATS8v	TRS
GATS1e	SM06_EA(ri)
GATS2e	ATS2e
GATS3e	Chi0_EA(dm)
GATS4e	SM03_EA
GATS5e	SpMin6_Bh(p)
GATS6e	B03[N-O]
GATS7e	B04[N-N]
GATS8e	GATS5i
GATS1p	Si
GATS2p	SpMin7_Bh(p)
GATS3p	B09[C-N]
GATS4p	SpMin7_Bh(v)
GATS5p	SHED_DL
GATS6p	SpMax6_Bh(i)
GATS7p	J_X
GATS8p	SHED_AA
GATS1i	ATS4v
GATS2i	SdO
GATS3i	ChiA_H2
GATS4i	ATS6m
GATS5i	Eta_L
GATS6i	F06[C-O]
GATS7i	nCsp2
GATS8i	CATS2D_09_DL
GGI1	ATSC2i
GGI2	SpMaxA_EA(dm)
GGI3	SM05_AEA(ed)
GGI4	SM09_EA(bo)
GGI5	SpMin6_Bh(v)
GGI6	ATS7p
GGI7	DELS
GGI8	P_VSA_charge_3
GGI9	F02[C-C]
GGI10	SpMax_H2
JGI1	ATS8e
JGI2	SM05_EA(ri)
JGI3	SM10_EA(bo)
JGI4	F03[N-N]
JGI5	SpMin4_Bh(m)
JGI6	SM06_EA
JGI7	ATSC3m
JGI8	Eta_B
JGI9	SpMin5_Bh(v)
JGI10	ATS4m
JGT	ATSC8p
SpMax1_Bh(m)	SpMin6_Bh(m)
SpMax2_Bh(m)	ATS2i
SpMax3_Bh(m)	P_VSA_MR_2
SpMax4_Bh(m)	CATS2D_05_AL
SpMax5_Bh(m)	TPSA(NO)
SpMax6_Bh(m)	SpMin8_Bh(m)
SpMax7_Bh(m)	CATS2D_06_AL
SpMax8_Bh(m)	SpMin7_Bh(m)
SpMax1_Bh(v)	CATS2D_00_AA
SpMax2_Bh(v)	J_B(e)
SpMax3_Bh(v)	J_A
SpMax4_Bh(v)	Eig03_EA(ed)
SpMax5_Bh(v)	SM12_AEA(dm)
SpMax6_Bh(v)	J_B(m)
SpMax7_Bh(v)	J_B(i)
SpMax8_Bh(v)	ATS6v
SpMax1_Bh(e)	Eig04_AEA(dm)
SpMax2_Bh(e)	J_B(v)
SpMax3_Bh(e)	J_H2
SpMax4_Bh(e)	ATS4e
SpMax5_Bh(e)	ATS5m
SpMax6_Bh(e)	ATSC7i
SpMax7_Bh(e)	J_B(p)
SpMax8_Bh(e)	ATSC4i
SpMax1_Bh(p)	nHet
SpMax2_Bh(p)	Rbrid
SpMax3_Bh(p)	ATS4p
SpMax4_Bh(p)	nLevel9
SpMax5_Bh(p)	P_VSA_i_2
SpMax6_Bh(p)	TPSA(Tot)
SpMax7_Bh(p)	nHAcc
SpMax8_Bh(p)	SpMin5_Bh(m)
SpMax1_Bh(i)	SpDiam_H2
SpMax2_Bh(i)	Rperim
SpMax3_Bh(i)	P_VSA_MR_5
SpMax4_Bh(i)	Eta_F_A
SpMax5_Bh(i)	SM05_EA
SpMax6_Bh(i)	SM11_EA(bo)
SpMax7_Bh(i)	ATS4i
SpMax8_Bh(i)	GGI3
SpMin1_Bh(m)	Eig02_AEA(bo)
SpMin2_Bh(m)	CATS2D_08_DL
SpMin3_Bh(m)	ATS8i
SpMin4_Bh(m)	ATSC4p
SpMin5_Bh(m)	B10[C-O]
SpMin6_Bh(m)	O-058
SpMin7_Bh(m)	VR2_B(m)
SpMin8_Bh(m)	VR2_B(v)
SpMin1_Bh(v)	P_VSA_charge_9
SpMin2_Bh(v)	VR2_B(i)
SpMin3_Bh(v)	VR2_B(e)
SpMin4_Bh(v)	VR2_B(p)
SpMin5_Bh(v)	SM12_EA(bo)
SpMin6_Bh(v)	F03[C-C]
SpMin7_Bh(v)	ATSC2p
SpMin8_Bh(v)	ATS5v
SpMin1_Bh(e)	ATSC1p
SpMin2_Bh(e)	nR06
SpMin3_Bh(e)	SpMax1_Bh(e)
SpMin4_Bh(e)	SM06_AEA(ed)
SpMin5_Bh(e)	ATSC8m
SpMin6_Bh(e)	ATSC3v
SpMin7_Bh(e)	P_VSA_ppp_con
SpMin8_Bh(e)	nLevel10
SpMin1_Bh(p)	Chi1_EA(dm)
SpMin2_Bh(p)	F05[C-C]
SpMin3_Bh(p)	B10[C-F]
SpMin4_Bh(p)	ATSC5e
SpMin5_Bh(p)	SM07_EA(ri)
SpMin6_Bh(p)	Eig03_AEA(ed)
SpMin7_Bh(p)	SM08_EA(ri)
SpMin8_Bh(p)	F03[C-O]
SpMin1_Bh(i)	SM1_Dz(e)
SpMin2_Bh(i)	MATS6e
SpMin3_Bh(i)	nLevel8
SpMin4_Bh(i)	CATS2D_05_DA
SpMin5_Bh(i)	SM1_Dz(i)
SpMin6_Bh(i)	SM13_EA(bo)
SpMin7_Bh(i)	F06[C-C]
SpMin8_Bh(i)	MAXDP
P_VSA_LogP_1	C-002
P_VSA_LogP_2	CATS2D_06_DL
P_VSA_LogP_3	B09[C-F]
P_VSA_LogP_4	ATS6p
P_VSA_LogP_5	Eig02_EA(ri)
P_VSA_LogP_6	SpMax_B(e)
P_VSA_LogP_7	JGI5
P_VSA_LogP_8	P_VSA_e_2
P_VSA_MR_1	SM14_EA(bo)
P_VSA_MR_2	P_VSA_p_2
P_VSA_MR_3	ATSC8e
P_VSA_MR_4	F02[C-O]
P_VSA_MR_5	ATS7e
P_VSA_MR_6	H-052
P_VSA_MR_7	SM1_Dz(v)
P_VSA_MR_8	PHI
P_VSA_m_1	P_VSA_s_3
P_VSA_m_2	ATSC8v
P_VSA_m_3	F10[C-F]
P_VSA_m_4	SpMax_B(v)
P_VSA_m_5	SM15_EA(bo)
P_VSA_v_1	F07[C-O]
P_VSA_v_2	SpMax1_Bh(v)
P_VSA_v_3	P_VSA_ppp_cyc
P_VSA_v_4	ATS5p
P_VSA_e_1	ATSC2v
P_VSA_e_2	CATS2D_07_DL
P_VSA_e_3	SM03_EA(ed)
P_VSA_e_4	SHED_DA
P_VSA_e_5	GATS5v
P_VSA_e_6	ATSC6i
P_VSA_p_1	CATS2D_03_AA
P_VSA_p_2	SM07_EA
P_VSA_p_3	nCs
P_VSA_p_4	NdO
P_VSA_i_1	CATS2D_09_LL
P_VSA_i_2	P_VSA_ppp_A
P_VSA_i_3	B10[C-C]
P_VSA_i_4	SpMin2_Bh(p)
P_VSA_s_1	ATSC7e
P_VSA_s_2	SM08_EA
P_VSA_s_3	SM1_Dz(p)
P_VSA_s_4	B08[N-F]
P_VSA_s_5	SM07_AEA(ed)
P_VSA_s_6	ATSC4m
P_VSA_ppp_L	S3K
P_VSA_ppp_P	ATS5e
P_VSA_ppp_N	SM09_EA(ri)
P_VSA_ppp_D	P_VSA_ppp_ar
P_VSA_ppp_A	MATS5p
P_VSA_ppp_ar	SpDiam_EA(bo)
P_VSA_ppp_con	P_VSA_LogP_2
P_VSA_ppp_hal	SM04_EA(ed)
P_VSA_ppp_cyc	B08[C-N]
P_VSA_ppp_ter	ATS7i
P_VSA_charge_1	max_conj_path
P_VSA_charge_2	Uindex
P_VSA_charge_3	F05[C-N]
P_VSA_charge_4	F08[N-F]
P_VSA_charge_5	SpDiam_B(e)
P_VSA_charge_6	P_VSA_v_2
P_VSA_charge_7	SM10_EA(ri)
P_VSA_charge_8	SpMax1_Bh(i)
P_VSA_charge_9	F09[C-F]
P_VSA_charge_10	CIC0
P_VSA_charge_11	SpDiam_B(p)
P_VSA_charge_12	CATS2D_08_AA
P_VSA_charge_13	nN
P_VSA_charge_14	P_VSA_charge_12
Eta_alpha	P_VSA_charge_7
Eta_alpha_A	ATSC1v
Eta_epsi	SpDiam_B(v)
Eta_epsi_A	P_VSA_LogP_5
Eta_betaS	ATSC5i
Eta_betaS_A	SpMax1_Bh(p)
Eta_betaP	nH
Eta_betaP_A	F04[C-N]
Eta_beta	nLevel7
Eta_beta_A	nRCONHR
Eta_C	ATSC4v
Eta_C_A	P_VSA_v_1
Eta_L	P_VSA_m_1
Eta_L_A	Eig02_AEA(ri)
Eta_R	F04[C-C]
Eta_F	P_VSA_s_2
Eta_F_A	ATS5i
Eta_LR	H-047
Eta_FL	NssCH2
Eta_FL_A	P_VSA_charge_8
Eta_B	SpMax_B(p)
Eta_B_A	P_VSA_charge_10
Eta_sh_p	RCI
Eta_sh_y	MATS4e
Eta_sh_x	ATSC3e
Eta_D_AlphaA	NaasC
Eta_D_AlphaB	B07[N-O]
Eta_epsi_2	T(O..O)
Eta_epsi_3	PCD
Eta_epsi_4	CATS2D_04_DA
Eta_epsi_5	SpMin2_Bh(v)
Eta_D_epsiA	P_VSA_s_5
Eta_D_epsiB	P_VSA_MR_1
Eta_D_epsiC	B09[C-O]
Eta_D_epsiD	P_VSA_e_1
Eta_psi1	SpDiam_B(i)
Eta_D_psiA	CATS2D_03_AL
Eta_D_psiB	P_VSA_p_1
Eta_D_beta	SpMin2_Bh(i)
Eta_D_beta_A	F05[C-O]
SpMax_EA	SM08_AEA(ed)
SpMaxA_EA	QEDu
SpDiam_EA	ATSC7p
SpAD_EA	SM11_EA(ri)
SpMAD_EA	P_VSA_i_3
SpMax_EA(ed)	Eig02_EA
SpMaxA_EA(ed)	SM10_AEA(bo)
SpDiam_EA(ed)	SM11_AEA(ri)
SpAD_EA(ed)	SpMax_EA(bo)
SpMAD_EA(ed)	Eig01_EA(bo)
SpMax_EA(bo)	ATS6e
SpMaxA_EA(bo)	VE2sign_B(p)
SpDiam_EA(bo)	N-072
SpAD_EA(bo)	P_VSA_MR_6
SpMAD_EA(bo)	ATSC5p
SpMax_EA(dm)	GGI5
SpMaxA_EA(dm)	SM5_X
SpDiam_EA(dm)	MaxaaN
SpAD_EA(dm)	SpMin2_Bh(e)
SpMAD_EA(dm)	minsOH
SpMax_EA(ri)	NNRS
SpMaxA_EA(ri)	P_VSA_e_3
SpDiam_EA(ri)	SM09_EA
SpAD_EA(ri)	P_VSA_LogP_7
SpMAD_EA(ri)	RFD
SpMax_AEA(ed)	SM12_EA(ri)
SpMaxA_AEA(ed)	F07[N-O]
SpDiam_AEA(ed)	GATS4i
SpAD_AEA(ed)	SAacc
SpMAD_AEA(ed)	F01[C-N]
SpMax_AEA(bo)	SpMax_B(i)
SpMaxA_AEA(bo)	SRW05
SpDiam_AEA(bo)	VE2sign_B(v)
SpAD_AEA(bo)	nAA
SpMAD_AEA(bo)	SpPosA_L
SpMax_AEA(dm)	SM10_EA
SpMaxA_AEA(dm)	ATSC5m
SpDiam_AEA(dm)	Eig05_EA(dm)
SpAD_AEA(dm)	nAB
SpMAD_AEA(dm)	Eta_epsi_3
SpMax_AEA(ri)	N-068
SpMaxA_AEA(ri)	ATS6i
SpDiam_AEA(ri)	ATSC1m
SpAD_AEA(ri)	F05[O-O]
SpMAD_AEA(ri)	P_VSA_p_3
Chi0_EA	NRS
Chi1_EA	SM09_AEA(ed)
Chi0_EA(ed)	mindO
Chi1_EA(ed)	meanDistFromCC
Chi0_EA(bo)	B08[C-F]
Chi1_EA(bo)	SM13_EA(ri)
Chi0_EA(dm)	SM11_AEA(dm)
Chi1_EA(dm)	Eig02_EA(ed)
Chi0_EA(ri)	nDB
Chi1_EA(ri)	T(N..F)
Chi0_AEA(ed)	nO
Chi1_AEA(ed)	MaxsOH
Chi0_AEA(bo)	C-008
Chi1_AEA(bo)	B07[N-N]
Chi0_AEA(dm)	SssNH
Chi1_AEA(dm)	ATSC7m
Chi0_AEA(ri)	ChiA_X
Chi1_AEA(ri)	B10[N-O]
SM02_EA	T(O..F)
SM03_EA	s4_numRotBonds
SM04_EA	SM1_Dz(Z)
SM05_EA	P_VSA_v_3
SM06_EA	GATS7v
SM07_EA	SAscore
SM08_EA	AVS_B(v)
SM09_EA	F10[N-O]
SM10_EA	SM14_EA(ri)
SM11_EA	MATS5v
SM12_EA	SM1_Dz(m)
SM13_EA	ATSC6p
SM14_EA	VE2sign_B(m)
SM15_EA	ATSC4e
SM02_EA(ed)	C-026
SM03_EA(ed)	SaaN
SM04_EA(ed)	F04[N-N]
SM05_EA(ed)	nCar
SM06_EA(ed)	RBF
SM07_EA(ed)	chiralMoment
SM08_EA(ed)	SM11_EA
SM09_EA(ed)	nLevel6
SM10_EA(ed)	nPyridines
SM11_EA(ed)	SM10_AEA(ed)
SM12_EA(ed)	SRW09
SM13_EA(ed)	ATSC7v
SM14_EA(ed)	GATS4e
SM15_EA(ed)	SRW07
SM02_EA(bo)	SM15_EA(ri)
SM03_EA(bo)	GATS3p
SM04_EA(bo)	Eig06_EA(dm)
SM05_EA(bo)	s4_size
SM06_EA(bo)	JGI10
SM07_EA(bo)	maxDistfromCC
SM08_EA(bo)	s4_pathLength
SM09_EA(bo)	s34_size
SM10_EA(bo)	GATS5p
SM11_EA(bo)	s3_phSize
SM12_EA(bo)	CATS2D_00_LL
SM13_EA(bo)	nR05
SM14_EA(bo)	AVS_B(p)
SM15_EA(bo)	SM12_EA
SM02_EA(dm)	minaaN
SM03_EA(dm)	H-046
SM04_EA(dm)	MaxssNH
SM05_EA(dm)	phLevel2
SM06_EA(dm)	SpDiam_AEA(bo)
SM07_EA(dm)	ATSC5v
SM08_EA(dm)	SpMAD_EA(ri)
SM09_EA(dm)	SM05_EA(ed)
SM10_EA(dm)	B02[C-F]
SM11_EA(dm)	SpDiam_B(m)
SM12_EA(dm)	B08[N-O]
SM13_EA(dm)	SpMAD_A
SM14_EA(dm)	SpPosA_A
SM15_EA(dm)	Eig02_AEA(ed)
SM02_EA(ri)	B05[O-O]
SM03_EA(ri)	B08[N-N]
SM04_EA(ri)	GATS1e
SM05_EA(ri)	SM11_AEA(ed)
SM06_EA(ri)	SpMin2_Bh(m)
SM07_EA(ri)	F09[N-O]
SM08_EA(ri)	P_VSA_charge_2
SM09_EA(ri)	NaaN
SM10_EA(ri)	B01[C-F]
SM11_EA(ri)	nR10
SM12_EA(ri)	P_VSA_i_4
SM13_EA(ri)	P_VSA_s_6
SM14_EA(ri)	SssCH2
SM15_EA(ri)	B09[N-O]
SM02_AEA(ed)	B06[N-N]
SM03_AEA(ed)	Eta_sh_p
SM04_AEA(ed)	B05[N-N]
SM05_AEA(ed)	C-006
SM06_AEA(ed)	CATS2D_01_LL
SM07_AEA(ed)	CATS2D_03_LL
SM08_AEA(ed)	SM13_EA
SM09_AEA(ed)	F08[N-N]
SM10_AEA(ed)	GATS3m
SM11_AEA(ed)	nArX
SM12_AEA(ed)	F08[C-F]
SM13_AEA(ed)	P_VSA_charge_11
SM14_AEA(ed)	MaxssO
SM15_AEA(ed)	F07[N-N]
SM02_AEA(bo)	SpMAD_B(e)
SM03_AEA(bo)	P_VSA_e_5
SM04_AEA(bo)	B04[C-F]
SM05_AEA(bo)	SpMin1_Bh(i)
SM06_AEA(bo)	QED
SM07_AEA(bo)	SM06_EA(ed)
SM08_AEA(bo)	SpDiam_EA(ri)
SM09_AEA(bo)	B05[C-F]
SM10_AEA(bo)	CATS2D_09_AA
SM11_AEA(bo)	SpDiam_L
SM12_AEA(bo)	F-084
SM13_AEA(bo)	SM12_AEA(ed)
SM14_AEA(bo)	SpMAD_B(i)
SM15_AEA(bo)	ATSC6v
SM02_AEA(dm)	Eig01_AEA(bo)
SM03_AEA(dm)	SpMax_AEA(bo)
SM04_AEA(dm)	ATSC2m
SM05_AEA(dm)	SM14_EA
SM06_AEA(dm)	F01[C-O]
SM07_AEA(dm)	P_VSA_s_4
SM08_AEA(dm)	s34_phSize
SM09_AEA(dm)	nCsp3
SM10_AEA(dm)	AVS_B(e)
SM11_AEA(dm)	B06[C-F]
SM12_AEA(dm)	minssNH
SM13_AEA(dm)	C-034
SM14_AEA(dm)	Eig04_EA(dm)
SM15_AEA(dm)	NssNH
SM02_AEA(ri)	F07[O-O]
SM03_AEA(ri)	SpMAD_B(v)
SM04_AEA(ri)	GATS6e
SM05_AEA(ri)	C-043
SM06_AEA(ri)	SpMAD_EA(dm)
SM07_AEA(ri)	MATS3e
SM08_AEA(ri)	SM15_EA
SM09_AEA(ri)	CATS2D_03_DL
SM10_AEA(ri)	F05[N-N]
SM11_AEA(ri)	P_VSA_charge_13
SM12_AEA(ri)	CATS2D_05_DL
SM13_AEA(ri)	AVS_B(i)
SM14_AEA(ri)	Eta_C_A
SM15_AEA(ri)	CATS2D_08_LL
Eig01_EA	B09[C-C]
Eig02_EA	B03[C-F]
Eig03_EA	CATS2D_04_DL
Eig04_EA	MATS1e
Eig05_EA	C-040
Eig06_EA	MATS2i
Eig07_EA	F02[C-F]
Eig08_EA	SM13_AEA(ed)
Eig09_EA	MATS5i
Eig10_EA	F03[C-N]
Eig11_EA	NsssN
Eig12_EA	B10[N-F]
Eig13_EA	CATS2D_02_DL
Eig14_EA	ATSC6m
Eig15_EA	F10[N-F]
Eig01_EA(ed)	F06[N-N]
Eig02_EA(ed)	B08[C-O]
Eig03_EA(ed)	chiralPhMoment
Eig04_EA(ed)	SpMin1_Bh(e)
Eig05_EA(ed)	ESOL
Eig06_EA(ed)	CATS2D_07_AA
Eig07_EA(ed)	SsssN
Eig08_EA(ed)	B02[N-O]
Eig09_EA(ed)	F01[C-F]
Eig10_EA(ed)	F07[C-S]
Eig11_EA(ed)	F08[C-S]
Eig12_EA(ed)	s4_phSize
Eig13_EA(ed)	B08[C-S]
Eig14_EA(ed)	P_VSA_m_3
Eig15_EA(ed)	VE1_B(e)
Eig01_EA(bo)	SM14_AEA(ed)
Eig02_EA(bo)	N-075
Eig03_EA(bo)	minssO
Eig04_EA(bo)	C-027
Eig05_EA(bo)	B07[C-S]
Eig06_EA(bo)	MATS5e
Eig07_EA(bo)	Eig03_AEA(dm)
Eig08_EA(bo)	NdssC
Eig09_EA(bo)	s34_relSize
Eig10_EA(bo)	SpPosA_H2
Eig11_EA(bo)	SpMAD_H2
Eig12_EA(bo)	SdssC
Eig13_EA(bo)	MaxaaaC
Eig14_EA(bo)	minsF
Eig15_EA(bo)	JGI3
Eig01_EA(dm)	SaaaC
Eig02_EA(dm)	MaxddssS
Eig03_EA(dm)	F01[O-S]
Eig04_EA(dm)	NaaaC
Eig05_EA(dm)	SddssS
Eig06_EA(dm)	minddssS
Eig07_EA(dm)	B01[O-S]
Eig08_EA(dm)	S-110
Eig09_EA(dm)	NddssS
Eig10_EA(dm)	P_VSA_MR_7
Eig11_EA(dm)	MaxssCH2
Eig12_EA(dm)	gmin
Eig13_EA(dm)	CATS2D_06_AA
Eig14_EA(dm)	F04[C-F]
Eig15_EA(dm)	SM15_AEA(ed)
Eig01_EA(ri)	H-051
Eig02_EA(ri)	VE2sign_B(e)
Eig03_EA(ri)	minaaaC
Eig04_EA(ri)	BIC3
Eig05_EA(ri)	nRSR
Eig06_EA(ri)	H-049
Eig07_EA(ri)	nCt
Eig08_EA(ri)	MATS4v
Eig09_EA(ri)	MaxsF
Eig10_EA(ri)	SpMAD_B(p)
Eig11_EA(ri)	NaaCH
Eig12_EA(ri)	SM07_EA(ed)
Eig13_EA(ri)	SpMax_B(m)
Eig14_EA(ri)	B03[N-S]
Eig15_EA(ri)	B07[O-O]
Eig01_AEA(ed)	F08[N-O]
Eig02_AEA(ed)	H-048
Eig03_AEA(ed)	F03[N-S]
Eig04_AEA(ed)	MATS2m
Eig05_AEA(ed)	MATS7p
Eig06_AEA(ed)	nSO2N
Eig07_AEA(ed)	F01[N-S]
Eig08_AEA(ed)	B01[N-S]
Eig09_AEA(ed)	SpMin1_Bh(v)
Eig10_AEA(ed)	F06[C-F]
Eig11_AEA(ed)	NaaNH
Eig12_AEA(ed)	MATS6i
Eig13_AEA(ed)	minaaNH
Eig14_AEA(ed)	nLevel5
Eig15_AEA(ed)	MaxaaNH
Eig01_AEA(bo)	PCR
Eig02_AEA(bo)	SaaNH
Eig03_AEA(bo)	CATS2D_02_LL
Eig04_AEA(bo)	C-028
Eig05_AEA(bo)	BIC0
Eig06_AEA(bo)	SpDiam_A
Eig07_AEA(bo)	Eig07_EA(dm)
Eig08_AEA(bo)	SpMax_EA(ri)
Eig09_AEA(bo)	Eig01_EA(ri)
Eig10_AEA(bo)	VE1_B(i)
Eig11_AEA(bo)	SIC0
Eig12_AEA(bo)	BIC2
Eig13_AEA(bo)	B03[O-S]
Eig14_AEA(bo)	F03[O-S]
Eig15_AEA(bo)	GATS8i
Eig01_AEA(dm)	nCbH
Eig02_AEA(dm)	C-024
Eig03_AEA(dm)	C-019
Eig04_AEA(dm)	BAC
Eig05_AEA(dm)	SM08_EA(ed)
Eig06_AEA(dm)	s2_numRotBonds
Eig07_AEA(dm)	VE1sign_B(p)
Eig08_AEA(dm)	F03[C-F]
Eig09_AEA(dm)	CATS2D_08_DA
Eig10_AEA(dm)	ChiA_B(p)
Eig11_AEA(dm)	F09[C-S]
Eig12_AEA(dm)	B10[C-S]
Eig13_AEA(dm)	VE1_B(p)
Eig14_AEA(dm)	B09[C-S]
Eig15_AEA(dm)	nTA
Eig01_AEA(ri)	NaasN
Eig02_AEA(ri)	CATS2D_02_AL
Eig03_AEA(ri)	GATS4v
Eig04_AEA(ri)	F10[C-S]
Eig05_AEA(ri)	SpMax_L
Eig06_AEA(ri)	SpPosA_B(v)
Eig07_AEA(ri)	SIC3
Eig08_AEA(ri)	SpMax_AEA(ri)
Eig09_AEA(ri)	Eig01_AEA(ri)
Eig10_AEA(ri)	SsCH3
Eig11_AEA(ri)	s3_phRelSize_2
Eig12_AEA(ri)	ChiA_B(v)
Eig13_AEA(ri)	F08[O-O]
Eig14_AEA(ri)	MATS1m
Eig15_AEA(ri)	nR=Cs
nCp	CATS2D_07_DA
nCs	GATS2m
nCt	MaxsssN
nCq	VE1_B(v)
nCrs	s4_relSize
nCrt	CATS2D_00_DD
nCrq	B07[C-N]
nCar	B04[N-O]
nCbH	F05[C-F]
nCb-	SIC2
nCconj	SaasC
nR=Cp	CATS2D_06_DA
nR=Cs	LOGP99
nR=Ct	NsCH3
n=C=	s3_phRelSize
nR#CH/X	SssO
nR#C-	B07[C-F]
nROCN	Eta_sh_x
nArOCN	minaasC
nRNCO	s3_numRotBonds
nArNCO	SpDiam_AEA(dm)
nRSCN	VE1sign_B(v)
nArSCN	SpDiam_AEA(ri)
nRNCS	B08[O-O]
nArNCS	P_VSA_e_6
nRCOOH	nF
nArCOOH	NsF
nRCOOR	SpMax_A
nArCOOR	B09[N-N]
nRCONH2	O-060
nArCONH2	SaaO
nRCONHR	F09[N-N]
nArCONHR	MaxaaO
nRCONR2	minaaO
nArCONR2	SaasN
nROCON	SaaCH
nArOCON	NssS
nRCOX	MATS5m
nArCOX	mindssC
nRCSOH	B09[N-F]
nArCSOH	NaaO
nRCSSH	SpPosA_B(p)
nArCSSH	s4_numAroBonds
nRCOSR	MaxaasN
nArCOSR	B06[C-N]
nRCSSR	minaasN
nArCSSR	MATS4p
nRCHO	F09[N-F]
nArCHO	P_VSA_ppp_ter
nRCO	SpDiam_EA
nArCO	SM09_EA(ed)
nCONN	GATS7p
nC=O(O)2	SM09_AEA(bo)
nN=C-N<	Eig01_EA
nC(=N)N2	SpMax_EA
nRC=N	SpMax1_Bh(m)
nArC=N	C-001
nRCNO	SpMin1_Bh(p)
nArCNO	F09[O-O]
nRNH2	SsF
nArNH2	CATS2D_00_NN
nRNHR	SpDiam_EA(dm)
nArNHR	SM14_EA(dm)
nRNR2	s3_size
nArNR2	s3_pathLength
nN-N	ATSC6e
nN=N	SpDiam_AEA(ed)
nRCN	SpMAD_AEA(ed)
nArCN	SM12_EA(dm)
nN+	GATS6i
nNq	B01[N-N]
nRNHO	minssS
nArNHO	MaxssS
nRNNOx	P_VSA_ppp_N
nArNNOx	MaxsCH3
nRNO	SssS
nArNO	VE1_B(m)
nRNO2	SM10_EA(ed)
nArNO2	F07[C-F]
nN(CO)2	PW4
nC=N-N<	SM10_EA(dm)
nROH	H-050
nArOH	nBnz
nOHp	O-057
nOHs	VE1sign_B(m)
nOHt	MDEC-11
nROR	F06[N-O]
nArOR	P_VSA_charge_6
nROX	SpMax_EA(dm)
nArOX	Eig01_EA(dm)
nO(C=O)2	MAXDN
nH2O	SM08_EA(dm)
nSH	nHDon
nC=S	nCrs
nRSR	Eta_D_epsiA
nRSSR	ATSC2e
nSO	F01[N-N]
nS(=O)2	C-025
nSOH	F02[C-S]
nSOOH	NsssCH
nSO2OH	SM06_EA(dm)
nSO3OH	CATS2D_02_DA
nSO2	SM11_EA(ed)
nSO3	B02[N-S]
nSO4	JGI8
nSO2N	C-032
nPO3	SpDiam_EA(ed)
nPO4	P_VSA_s_1
nPR3	GATS6v
nP(=O)O2R	B09[O-O]
nP(=O)R3/nPR5	P_VSA_charge_5
nCH2RX	SsOH
nCHR2X	P_VSA_LogP_1
nCR3X	F02[N-S]
nR=CHX	B06[N-O]
nR=CRX	SM12_EA(ed)
nR#CX	B05[N-S]
nCHRX2	Eig02_AEA(dm)
nCR2X2	P_VSA_charge_1
nR=CX2	GATS3v
nCRX3	CATS2D_01_DN
nArX	F02[N-N]
nCXr	SpMax_AEA(dm)
nCXr=	Eig01_AEA(dm)
nCconjX	SpMAD_B(m)
nAziridines	JGI9
nOxiranes	MaxaasC
nThiranes	MATS3p
nAzetidines	CATS2D_02_AA
nOxetanes	GATS2i
nThioethanes	Eta_epsi_A
nBeta-Lactams	nArOR
nPyrrolidines	F05[N-S]
nOxolanes	F03[C-S]
ntH-Thiophenes	T(N..S)
nPyrroles	C-003
nPyrazoles	ChiA_B(i)
nImidazoles	SM13_EA(ed)
nFuranes	C-005
nThiophenes	B04[O-S]
nOxazoles	nRNR2
nIsoxazoles	B03[C-S]
nThiazoles	F04[O-S]
nIsothiazoles	GATS8p
nTriazoles	C-009
nPyridines	CATS2D_03_DD
nPyridazines	Me
nPyrimidines	CATS2D_09_DA
nPyrazines	minssCH2
n135-Triazines	SM14_EA(ed)
n124-Triazines	P_VSA_ppp_L
nHDon	B10[N-N]
nHAcc	CATS2D_01_AN
C-001	F04[N-F]
C-002	nX
C-003	SHED_DD
C-004	nRCO
C-005	BIC4
C-006	SM04_EA(dm)
C-007	F04[N-O]
C-008	SHED_DN
C-009	C%
C-010	VE2sign_B(i)
C-011	Eig03_EA(dm)
C-012	GATS7m
C-013	SM15_EA(ed)
C-014	B04[N-F]
C-015	CATS2D_07_LL
C-016	C-018
C-017	SHED_AN
C-018	Eta_epsi_2
C-019	SpMin1_Bh(m)
C-020	MATS7v
C-021	GATS4p
C-022	CATS2D_05_LL
C-023	MATS3i
C-024	Eta_betaS_A
C-025	F10[N-N]
C-026	P_VSA_LogP_6
C-027	B07[N-S]
C-028	SpMax_AEA(ed)
C-029	Eig01_AEA(ed)
C-030	F06[C-S]
C-031	minsCH3
C-032	nPyrazoles
C-033	SM11_EA(dm)
C-034	B10[O-O]
C-035	NdsN
C-036	F07[N-S]
C-037	nCb-
C-038	AVS_X
C-039	GATS2p
C-040	MATS1v
C-041	MATS4i
C-042	SM09_EA(dm)
C-043	SM07_EA(dm)
C-044	MATS8e
H-046	S-107
H-047	F04[N-Cl]
H-048	B04[N-Cl]
H-049	MATS1i
H-050	CATS2D_05_NL
H-051	NssO
H-052	arLevel3
H-053	LOGPcons
H-054	P_VSA_ppp_hal
H-055	CATS2D_04_AL
O-056	ChiA_B(e)
O-057	SIC4
O-058	C-011
O-059	minsssCH
O-060	F04[S-F]
O-061	B04[S-F]
O-062	SM15_EA(dm)
O-063	B07[N-F]
Se-064	B08[C-C]
Se-065	SdsN
N-066	nRCOOH
N-067	JGI2
N-068	CATS2D_05_PL
N-069	CATS2D_04_PL
N-070	Eig08_EA(dm)
N-071	C-007
N-072	N%
N-073	SM13_EA(dm)
N-074	s2_phSize
N-075	s2_size
N-076	F10[O-O]
N-077	SHED_NL
N-078	MaxdsN
N-079	B04[O-O]
F-081	SM10_AEA(dm)
F-082	SpMax_EA(ed)
F-083	Eig01_EA(ed)
F-084	SpMAD_AEA(ri)
F-085	F06[O-F]
Cl-086	B06[C-O]
Cl-087	MCD
Cl-088	P_VSA_MR_8
Cl-089	SpMAD_AEA(bo)
Cl-090	F07[N-F]
Br-091	MDEO-12
Br-092	AMW
Br-093	nRCONR2
Br-094	mindsN
Br-095	Eta_D_epsiC
I-096	s34_phRelSize
I-097	Mi
I-098	CATS2D_04_AP
I-099	AVS_B(m)
I-100	s2_relPathLength
F-101	F04[C-S]
Cl-102	B06[O-F]
Br-103	SHED_PP
I-104	nCrt
S-106	F04[O-O]
S-107	ChiralCenter
S-108	nLevel4
S-109	CATS2D_07_DD
S-110	nR=Ct
Si-111	C-017
B-112	SpMAD_EA
P-115	minsssN
P-116	nPyrimidines
P-117	F10[C-Cl]
P-118	CIC3
P-119	nR09
P-120	CATS2D_04_NL
SsCH3	arLevel2
SdCH2	B10[C-Cl]
SssCH2	MaxdssC
StCH	B04[C-S]
SdsCH	B08[N-S]
SaaCH	F08[N-S]
SsssCH	B06[C-S]
SddC	s4_relPathLength
StsC	Hy
SdssC	T(O..S)
SaasC	CATS2D_01_DA
SaaaC	SsssCH
SssssC	B05[O-S]
SsNH2	JGI1
SssNH	GATS5m
SdNH	GATS5e
SsssN	C-038
SdsN	F05[O-S]
SaaN	nCconj
StN	SAdon
SsNH3+	GATS3i
SssNH2+	MATS7i
SdNH2+	SpMAD_EA(bo)
SsssNH+	CATS2D_02_AP
SssssN+	nS
SddsN	GATS8v
SaadN	s2_phRelSize_2
SaasN	C-033
SaaNH	Eta_epsi_4
SsOH	s2_pathLength
SdO
SssO
SaaO
SsPH2
SssPH
SsssP
SdsssP
SddsP
SsssssP
SsSH
SdS
SssS
SaaS
SdssS
SddssS
SssssssS
SsF
SsCl
SsBr
SsI
SsLi
SssBe
SssssBe-
SsBH2
SssBH
SsssB
SssssB-
SsGeH3
SssGeH2
SsssGeH
SssssGe
SsAsH2
SssAsH
SsssAs
SsssssAs
SdsssAs
SddsAs
SsSeH
SdSe
SssSe
SaaSe
SdssSe
SssssssSe
SddssSe
SsSnH3
SssSnH2
SsssSnH
SssssSn
SsPbH3
SssPbH2
SsssPbH
SssssPb
SsSiH3
SssSiH2
SsssSiH
SssssSi
NsCH3
NdCH2
NssCH2
NtCH
NdsCH
NaaCH
NsssCH
NddC
NtsC
NdssC
NaasC
NaaaC
NssssC
NsNH2
NssNH
NdNH
NsssN
NdsN
NaaN
NtN
NsNH3+
NssNH2+
NdNH2+
NsssNH+
NssssN+
NddsN
NaadN
NaasN
NaaNH
NsOH
NdO
NssO
NaaO
NsPH2
NssPH
NsssP
NdsssP
NddsP
NsssssP
NsSH
NdS
NssS
NaaS
NdssS
NddssS
NssssssS
NsF
NsCl
NsBr
NsI
NsLi
NssBe
NssssBe-
NsBH2
NssBH
NsssB
NssssB-
NsGeH3
NssGeH2
NsssGeH
NssssGe
NsAsH2
NssAsH
NsssAs
NsssssAs
NdsssAs
NddsAs
NsSeH
NdSe
NssSe
NaaSe
NdssSe
NssssssSe
NddssSe
NsSnH3
NssSnH2
NsssSnH
NssssSn
NsPbH3
NssPbH2
NsssPbH
NssssPb
NsSiH3
NssSiH2
NsssSiH
NssssSi
minsCH3
mindCH2
minssCH2
mintCH
mindsCH
minaaCH
minsssCH
minddC
mintsC
mindssC
minaasC
minaaaC
minssssC
minsNH2
minssNH
mindNH
minsssN
mindsN
minaaN
mintN
minsNH3+
minssNH2+
mindNH2+
minsssNH+
minssssN+
minddsN
minaadN
minaasN
minaaNH
minsOH
mindO
minssO
minaaO
minsPH2
minssPH
minsssP
mindsssP
minddsP
minsssssP
minsSH
mindS
minssS
minaaS
mindssS
minddssS
minssssssS
minsF
minsCl
minsBr
minsI
minsLi
minssBe
minssssBe-
minsBH2
minssBH
minsssB
minssssB-
minsGeH3
minssGeH2
minsssGeH
minssssGe
minsAsH2
minssAsH
minsssAs
minsssssAs
mindsssAs
minddsAs
minsSeH
mindSe
minssSe
minaaSe
mindssSe
minssssssSe
minddssSe
minsSnH3
minssSnH2
minsssSnH
minssssSn
minsPbH3
minssPbH2
minsssPbH
minssssPb
minsSiH3
minssSiH2
minsssSiH
minssssSi
gmin
MaxsCH3
MaxdCH2
MaxssCH2
MaxtCH
MaxdsCH
MaxaaCH
MaxsssCH
MaxddC
MaxtsC
MaxdssC
MaxaasC
MaxaaaC
MaxssssC
MaxsNH2
MaxssNH
MaxdNH
MaxsssN
MaxdsN
MaxaaN
MaxtN
MaxsNH3+
MaxssNH2+
MaxdNH2+
MaxsssNH+
MaxssssN+
MaxddsN
MaxaadN
MaxaasN
MaxaaNH
MaxsOH
MaxdO
MaxssO
MaxaaO
MaxsPH2
MaxssPH
MaxsssP
MaxdsssP
MaxddsP
MaxsssssP
MaxsSH
MaxdS
MaxssS
MaxaaS
MaxdssS
MaxddssS
MaxssssssS
MaxsF
MaxsCl
MaxsBr
MaxsI
MaxsLi
MaxssBe
MaxssssBe-
MaxsBH2
MaxssBH
MaxsssB
MaxssssB-
MaxsGeH3
MaxssGeH2
MaxsssGeH
MaxssssGe
MaxsAsH2
MaxssAsH
MaxsssAs
MaxsssssAs
MaxdsssAs
MaxddsAs
MaxsSeH
MaxdSe
MaxssSe
MaxaaSe
MaxdssSe
MaxssssssSe
MaxddssSe
MaxsSnH3
MaxssSnH2
MaxsssSnH
MaxssssSn
MaxsPbH3
MaxssPbH2
MaxsssPbH
MaxssssPb
MaxsSiH3
MaxssSiH2
MaxsssSiH
MaxssssSi
gmax
CATS2D_00_DD
CATS2D_01_DD
CATS2D_02_DD
CATS2D_03_DD
CATS2D_04_DD
CATS2D_05_DD
CATS2D_06_DD
CATS2D_07_DD
CATS2D_08_DD
CATS2D_09_DD
CATS2D_00_DA
CATS2D_01_DA
CATS2D_02_DA
CATS2D_03_DA
CATS2D_04_DA
CATS2D_05_DA
CATS2D_06_DA
CATS2D_07_DA
CATS2D_08_DA
CATS2D_09_DA
CATS2D_00_DP
CATS2D_01_DP
CATS2D_02_DP
CATS2D_03_DP
CATS2D_04_DP
CATS2D_05_DP
CATS2D_06_DP
CATS2D_07_DP
CATS2D_08_DP
CATS2D_09_DP
CATS2D_00_DN
CATS2D_01_DN
CATS2D_02_DN
CATS2D_03_DN
CATS2D_04_DN
CATS2D_05_DN
CATS2D_06_DN
CATS2D_07_DN
CATS2D_08_DN
CATS2D_09_DN
CATS2D_00_DL
CATS2D_01_DL
CATS2D_02_DL
CATS2D_03_DL
CATS2D_04_DL
CATS2D_05_DL
CATS2D_06_DL
CATS2D_07_DL
CATS2D_08_DL
CATS2D_09_DL
CATS2D_00_AA
CATS2D_01_AA
CATS2D_02_AA
CATS2D_03_AA
CATS2D_04_AA
CATS2D_05_AA
CATS2D_06_AA
CATS2D_07_AA
CATS2D_08_AA
CATS2D_09_AA
CATS2D_00_AP
CATS2D_01_AP
CATS2D_02_AP
CATS2D_03_AP
CATS2D_04_AP
CATS2D_05_AP
CATS2D_06_AP
CATS2D_07_AP
CATS2D_08_AP
CATS2D_09_AP
CATS2D_00_AN
CATS2D_01_AN
CATS2D_02_AN
CATS2D_03_AN
CATS2D_04_AN
CATS2D_05_AN
CATS2D_06_AN
CATS2D_07_AN
CATS2D_08_AN
CATS2D_09_AN
CATS2D_00_AL
CATS2D_01_AL
CATS2D_02_AL
CATS2D_03_AL
CATS2D_04_AL
CATS2D_05_AL
CATS2D_06_AL
CATS2D_07_AL
CATS2D_08_AL
CATS2D_09_AL
CATS2D_00_PP
[truncated: 1,767 more rows]

## Sheet: 7. IL-1β
Supplementary Data 4. The optimal combination of descriptors of each algorithm
Bioactivity dataset 1. Biological toxicology
Descriptprs-Original (n=3964)	Descriptprs-Wilcoxon (n=1417)	Descriptprs-Spearman (n=156)	Descriptprs-RFE (XGBoost,n=138)	Descriptprs-DT (n=156)	Descriptprs-LR (n=84)	Descriptprs-RF (n=141)
MW	ESOL	ESOL	ESOL	ESOL	ESOL	ESOL
AMW	LOGPcons	MRcons	MRcons	MRcons	MRcons	MRcons
Sv	LOGP99	SHED_LL	SHED_LL	SHED_LL	SHED_LL	SHED_LL
Se	MRcons	QED	QED	QED	QED	QED
Sp	MR99	MaxaaCH	MaxaaCH	MaxaaCH	MaxaaCH	MaxaaCH
Si	SM5_B(p)	SpMin1_Bh(e)	SpMin1_Bh(e)	SpMin1_Bh(e)	SpMax1_Bh(p)	SpMin1_Bh(e)
Mv	SM6_B(p)	SpMin2_Bh(i)	SpMin2_Bh(i)	SpMin2_Bh(i)	Eta_D_psiA	SpMin2_Bh(i)
Me	SM3_B(p)	SpMax1_Bh(p)	SpMax1_Bh(p)	SpMax1_Bh(p)	O%	SpMax1_Bh(p)
Mp	SM4_B(p)	Eta_D_psiA	Eta_D_psiA	Eta_D_psiA	SpMaxA_EA(dm)	Eta_D_psiA
Mi	H_Dz(p)	SpMax2_Bh(p)	SpMax2_Bh(p)	SpMax2_Bh(p)	VE1_H2	SpMax2_Bh(p)
GD	EE_B(p)	O%	O%	O%	VE1_B(m)	O%
nAT	SM6_B(v)	SpMaxA_EA(dm)	SpMaxA_EA(dm)	SpMaxA_EA(dm)	P_VSA_charge_6	SpMaxA_EA(dm)
nSK	SM5_B(v)	VE1_H2	VE1_H2	VE1_H2	IC4	VE1_H2
nAA	SM4_B(v)	SaasC	SaasC	SaasC	H-047	SaasC
nTA	EE_B(v)	VE1_B(m)	VE1_B(m)	VE1_B(m)	VE2sign_B(v)	VE1_B(m)
nBT	SM1_B(p)	P_VSA_charge_6	P_VSA_charge_6	P_VSA_charge_6	SpMAD_EA(dm)	P_VSA_charge_6
nBO	SpMaxA_AEA(dm)	IC4	IC4	IC4	VE2sign_B(m)	IC4
nBM	nC	F07[C-N]	F07[C-N]	F07[C-N]	CATS2D_04_LL	F07[C-N]
SCBO	SM3_B(v)	H-047	H-047	H-047	CATS2D_03_AL	H-047
RBN	piPC02	C-025	C-025	C-025	J_D/Dt	C-025
RBF	H_Dz(v)	VE2sign_B(v)	VE2sign_B(v)	VE2sign_B(v)	F04[C-N]	VE2sign_B(v)
nDB	SM02_EA(bo)	F08[C-N]	F08[C-N]	F08[C-N]	Chi1_EA(dm)	F08[C-N]
nTB	SM2_B(m)	SpMAD_EA(dm)	SpMAD_EA(dm)	SpMAD_EA(dm)	VE2sign_H2	SpMAD_EA(dm)
nAB	F01[C-C]	VE2sign_B(m)	VE2sign_B(m)	VE2sign_B(m)	MATS3e	VE2sign_B(m)
nH	HyWi_B(p)	CATS2D_04_LL	CATS2D_04_LL	CATS2D_04_LL	SHED_DL	CATS2D_04_LL
nC	SM2_B(p)	Eig02_EA(bo)	Eig02_EA(bo)	Eig02_EA(bo)	P_VSA_s_3	Eig02_EA(bo)
nN	F02[C-C]	CATS2D_03_AL	CATS2D_03_AL	CATS2D_03_AL	SssCH2	CATS2D_03_AL
nO	EE_B(m)	SpMax2_Bh(m)	SpMax2_Bh(m)	SpMax2_Bh(m)	RPCG	SpMax2_Bh(m)
nP	SpAD_B(m)	MDEC-33	MDEC-33	MDEC-33	GATS4m	MDEC-33
nS	HyWi_B(m)	J_D/Dt	J_D/Dt	J_D/Dt	F04[O-O]	J_D/Dt
nF	Eta_alpha	Xindex	Xindex	Xindex	GATS3e	Xindex
nCL	SM4_B(m)	F06[C-N]	F06[C-N]	F06[C-N]	GATS3m	F06[C-N]
nBR	piPC03	NaasC	NaasC	NaasC	SpMAD_AEA(dm)	NaasC
nI	SpAD_EA(bo)	CATS2D_09_AL	CATS2D_09_AL	CATS2D_09_AL	qnmax	CATS2D_09_AL
nB	Wi_B(p)	F04[C-N]	F04[C-N]	F04[C-N]	P_VSA_charge_2	F04[C-N]
nHM	SM3_B(m)	CATS2D_08_AL	CATS2D_08_AL	CATS2D_08_AL	P_VSA_charge_13	CATS2D_08_AL
nHet	SM2_B(v)	Chi1_EA(dm)	Chi1_EA(dm)	Chi1_EA(dm)	F05[O-O]	Chi1_EA(dm)
nX	ATS1p	AVS_B(p)	AVS_B(p)	AVS_B(p)	MATS3m	AVS_B(p)
H%	SpPos_B(p)	CATS2D_06_AL	CATS2D_06_AL	CATS2D_06_AL	GATS7i	CATS2D_06_AL
C%	HyWi_B(v)	CATS2D_04_AL	CATS2D_04_AL	CATS2D_04_AL	max_conj_path	CATS2D_04_AL
N%	VE2_Dt	MAXDP	MAXDP	MAXDP	F02[N-O]	MAXDP
O%	SCBO	F03[C-N]	F03[C-N]	F03[C-N]	SaaaC	F03[C-N]
X%	piPC01	CATS2D_05_AL	CATS2D_05_AL	CATS2D_05_AL	MaxaaN	CATS2D_05_AL
nCsp3	CATS2D_00_LL	VE2sign_H2	VE2sign_H2	VE2sign_H2	CATS2D_05_DA	VE2sign_H2
nCsp2	P_VSA_i_2	minssCH2	minssCH2	minssCH2	MATS1v	minssCH2
nCsp	VE2_Dz(i)	MATS3e	MATS3e	MATS3e	Eta_D_epsiD	MATS3e
Fsp3	F07[C-C]	NRS	NRS	NRS	CATS2D_09_DL	NRS
max_conj_path	SM1_B(v)	SHED_DL	SHED_DL	SHED_DL	P_VSA_charge_3	SHED_DL
nStructures	Wi_B(v)	P_VSA_s_3	P_VSA_s_3	P_VSA_s_3	MaxssNH	P_VSA_s_3
totalcharge	VE3_B(m)	SssCH2	SssCH2	SssCH2	GATS2i	SssCH2
nCIC	SpAbs_B(m)	RPCG	RPCG	RPCG	GATS7p	RPCG
nCIR	ATS1v	GATS4m	GATS4m	GATS4m	MDEC-12	GATS4m
TRS	P_VSA_v_3	F04[O-O]	F04[O-O]	F04[O-O]	C-028	F04[O-O]
Rperim	P_VSA_p_3	GATS3e	GATS3e	GATS3e	P_VSA_charge_12	GATS3e
Rbrid	SpAbs_B(p)	P_VSA_LogP_5	P_VSA_LogP_5	P_VSA_LogP_5	F02[C-N]	P_VSA_LogP_5
MCD	SpPos_B(v)	JGI3	JGI3	JGI3	nROR	JGI3
RFD	VE2_Dz(Z)	SpMAD_H2	SpMAD_H2	SpMAD_H2	O-058	SpMAD_H2
RCI	VE2_Dz(m)	GATS3m	GATS3m	GATS3m	F03[N-O]	GATS3m
NRS	Wi_B(m)	WiA_D/Dt	WiA_D/Dt	WiA_D/Dt	nN(CO)2	WiA_D/Dt
NNRS	SpMin4_Bh(i)	SpMax_AEA(bo)	SpMax_AEA(bo)	SpMax_AEA(bo)	H-046	SpMax_AEA(bo)
nSpiro	Ho_B(p)	CATS2D_02_AL	CATS2D_07_AL	CATS2D_02_AL	P_VSA_MR_7	CATS2D_02_AL
nBridgeHead	VE2_Dz(e)	CATS2D_07_AL	SpMAD_AEA(dm)	CATS2D_07_AL	MATS8e	CATS2D_07_AL
nR03	SpPos_B(m)	SpMAD_AEA(dm)	qnmax	SpMAD_AEA(dm)	CATS2D_08_DL	SpMAD_AEA(dm)
nR04	SM5_B(m)	qnmax	F01[C-N]	qnmax	ChiA_X	qnmax
nR05	Chi0_EA(ed)	F01[C-N]	P_VSA_charge_2	F01[C-N]	CATS2D_06_DL	F01[C-N]
nR06	SpAD_B(p)	P_VSA_charge_2	P_VSA_charge_13	P_VSA_charge_2	s34_phRelSize	P_VSA_charge_2
nR07	Sp	P_VSA_charge_13	MATS3m	P_VSA_charge_13	CATS2D_04_AA	P_VSA_charge_13
nR08	Vx	F05[O-O]	SAscore	F05[O-O]	C-002	F05[O-O]
nR09	VvdwMG	MATS3m	GATS7i	MATS3m	nRNR2	MATS3m
nR10	SpAbs_B(v)	SAscore	max_conj_path	SAscore	nRCONHR	SAscore
nR11	SpAD_B(v)	GATS7i	F02[N-O]	GATS7i	P_VSA_charge_14	GATS7i
nR12	Eig08_EA(bo)	max_conj_path	SaaaC	max_conj_path	GATS2p	max_conj_path
nBnz	F06[C-C]	F02[N-O]	PW5	F02[N-O]	P_VSA_ppp_hal	F02[N-O]
ARR	F08[C-C]	SaaaC	minaaCH	SaaaC	s2_numAroBonds	SaaaC
AP	Ho_B(m)	PW5	MaxaaN	PW5	B09[O-O]	PW5
D/Dtr03	Chi0_EA(ri)	minaaCH	CATS2D_05_DA	minaaCH	SM1_Dz(Z)	minaaCH
D/Dtr04	SpAD_B(e)	MaxaaN	P_VSA_charge_7	MaxaaN	B02[N-O]	MaxaaN
D/Dtr05	SM04_EA(bo)	CATS2D_05_DA	MaxsssN	CATS2D_05_DA	H-051	CATS2D_05_DA
D/Dtr06	Ho_B(v)	P_VSA_charge_7	MATS1v	P_VSA_charge_7	C-033	P_VSA_charge_7
D/Dtr07	Chi0_EA	MaxsssN	Eta_D_epsiD	MaxsssN	Eig08_EA(dm)	MaxsssN
D/Dtr08	Chi0_AEA(ed)	MATS1v	CATS2D_09_DL	MATS1v	B10[C-O]	MATS1v
D/Dtr09	Chi0_AEA(bo)	Eta_D_epsiD	P_VSA_charge_3	Eta_D_epsiD	F09[N-N]	Eta_D_epsiD
D/Dtr10	Chi0_AEA(dm)	CATS2D_09_DL	MaxsssCH	CATS2D_09_DL	GATS7e	CATS2D_09_DL
D/Dtr11	Chi0_AEA(ri)	P_VSA_charge_3	MaxssNH	P_VSA_charge_3	F06[N-N]	P_VSA_charge_3
D/Dtr12	VE3_H2	MaxsssCH	GATS2i	MaxsssCH		MaxsssCH
ZM1	VE3_B(i)	MaxssNH	GATS1i	MaxssNH		MaxssNH
ZM1V	SpAD_B(i)	GATS2i	GATS7p	GATS2i		GATS2i
ZM1Kup	SpPosLog_B(p)	GATS1i	MDEO-12	GATS1i		GATS1i
ZM1Mad	SNar	GATS7p	MATS4m	GATS7p		GATS7p
ZM1Per	Xt	MDEO-12	MDEC-12	MDEO-12		MDEO-12
ZM1MulPer	H_Dz(m)	MATS4m	F09[C-O]	MATS4m		MATS4m
ZM2	Ho_A	MDEC-12	D/Dtr09	MDEC-12		MDEC-12
ZM2V	Ho_Dt	F09[C-O]	P_VSA_charge_12	F09[C-O]		F09[C-O]
ZM2Kup	H_Dz(Z)	C-028	F02[C-N]	C-028		C-028
ZM2Mad	VE3_B(e)	D/Dtr09	ATSC1e	D/Dtr09		D/Dtr09
ZM2Per	Chi1_EA(ri)	P_VSA_charge_12	F10[C-O]	P_VSA_charge_12		P_VSA_charge_12
ZM2MulPer	SpPosLog_B(v)	F02[C-N]	SPP	F02[C-N]		F02[C-N]
ON0	VR1_Dz(i)	nROR	JGI6	nROR		ATSC1e
ON0V	VR1_Dz(e)	ATSC1e	O-058	ATSC1e		F10[C-O]
ON1	VR1_Dz(Z)	F10[C-O]	nN(CO)2	F10[C-O]		SPP
ON1V	VR1_Dz(m)	SPP	H-046	SPP		JGI6
Qindex	F09[C-C]	JGI6	SpDiam_X	JGI6		O-058
BBI	ATS2p	O-058	P_VSA_MR_7	O-058		F03[N-O]
DBI	EE_B(i)	F03[N-O]	Eta_betaS_A	F03[N-O]		H-046
SNar	VR1_D	nN(CO)2	MATS8e	nN(CO)2		SpDiam_X
HNar	SM2_B(i)	H-046	D/Dtr10	H-046		MDEN-33
GNar	VR1_Dz(v)	SpDiam_X	CATS2D_08_DL	SpDiam_X		P_VSA_MR_7
Xt	Chi_X	MDEN-33	CATS2D_06_DL	MDEN-33		Eta_betaS_A
Dz	Chi1_EA(ed)	P_VSA_MR_7	s34_phRelSize	P_VSA_MR_7		MATS8e
Ram	VR1_Dt	Eta_betaS_A	CATS2D_04_AA	Eta_betaS_A		D/Dtr10
Pol	SM08_AEA(dm)	MATS8e	JGI7	MATS8e		CATS2D_08_DL
LPRS	Eig14_EA	D/Dtr10	C-002	D/Dtr10		ChiA_X
MSD	VR1_Dz(p)	CATS2D_08_DL	IC2	CATS2D_08_DL		CATS2D_06_DL
SPI	SpPos_A	ChiA_X	CATS2D_04_DL	ChiA_X		s34_phRelSize
ECC	SpAD_A	CATS2D_06_DL	nRCONHR	CATS2D_06_DL		CATS2D_04_AA
AECC	Sv	s34_phRelSize	RNCG	s34_phRelSize		JGI7
DECC	VE2_Dz(v)	CATS2D_04_AA	P_VSA_charge_14	CATS2D_04_AA		C-002
MDDD	SM4_B(i)	JGI7	JGI2	JGI7		IC2
UNIP	H_Dz(e)	C-002	JGI5	C-002		CATS2D_04_DL
CENT	SpAD_H2	IC2	SsssCH	IC2		nRCONHR
VAR	SpPos_H2	CATS2D_04_DL	VE1sign_Dz(p)	CATS2D_04_DL		RNCG
ICR	SpMin4_Bh(e)	nRNR2	P_VSA_ppp_hal	nRNR2		P_VSA_charge_14
MaxTD	Ho_H2	s2_numRotBonds	MaxsCH3	s2_numRotBonds		JGI2
MeanTD	SM2_B(e)	nRCONHR	nArOR	nRCONHR		GATS2p
MaxDD	EE_B(e)	RNCG	B09[O-O]	RNCG		JGI5
MeanDD	Eig14_EA(ri)	P_VSA_charge_14	SM1_Dz(Z)	P_VSA_charge_14		SsssCH
SMTI	MW	JGI2	B02[N-O]	JGI2		VE1sign_Dz(p)
SMTIV	VE3_A	GATS2p	minssO	GATS2p		F04[N-O]
GMTI	SpAD_Dt	JGI5	nLevel9	JGI5		P_VSA_ppp_hal
GMTIV	SpPos_Dt	SsssCH	P_VSA_MR_3	SsssCH		MaxsCH3
Xu	CENT	VE1sign_Dz(p)	H-051	VE1sign_Dz(p)		nArOR
CSI	Eta_LR	F04[N-O]	SdssC	F04[N-O]		SM1_Dz(Z)
Wap	SM1_B(m)	P_VSA_ppp_hal	C-026	P_VSA_ppp_hal		minssO
S1K	VE2_D	MaxsCH3	Eig08_EA(dm)	MaxsCH3		nLevel9
S2K	SpPosLog_Dt	nArOR	MATS3v	nArOR		H-051
S3K	SM02_AEA(bo)	s2_numAroBonds	P_VSA_charge_1	s2_numAroBonds		SdssC
PHI	H_Dz(i)	B09[O-O]	C-006	B09[O-O]		C-026
PW2	VR1_D/Dt	SM1_Dz(Z)	GATS7e	SM1_Dz(Z)		MATS3v
PW3	SM4_B(e)	B02[N-O]		B02[N-O]		P_VSA_charge_1
PW4	CID	minssO		minssO		C-006
PW5	Eig13_EA(ri)	nLevel9		nLevel9		GATS7e
MAXDN	SM03_AEA(bo)	P_VSA_MR_3		P_VSA_MR_3
MAXDP	Chi_H2	H-051		H-051
DELS	HyWi_X	SdssC		SdssC
TIE	IVDM	C-033		C-033
BAC	VR3_Dz(Z)	C-026		C-026
LOC	VR3_Dz(m)	Eig08_EA(dm)		Eig08_EA(dm)
MWC01	VR3_Dz(e)	CATS2D_03_DA		CATS2D_03_DA
MWC02	SM3_Dt	C-003		C-003
MWC03	Chi1_AEA(dm)	MATS3v		MATS3v
MWC04	Chi1_AEA(ed)	B10[C-O]		B10[C-O]
MWC05	Chi1_AEA(bo)	F09[N-N]		F09[N-N]
MWC06	Chi1_AEA(ri)	P_VSA_charge_1		P_VSA_charge_1
MWC07	Chi1_EA	C-006		C-006
MWC08	VR3_Dz(i)	GATS7e		GATS7e
MWC09	SpAbs_B(i)	F06[N-N]		F06[N-N]
MWC10	Ho_L
SRW02	VR3_Dz(v)
SRW03	VR3_D
SRW04	VR3_Dt
SRW05	Wi_B(i)
SRW06	SM5_Dt
SRW07	VR3_Dz(p)
SRW08	SpMax_Dt
SRW09	SpMax5_Bh(m)
SRW10	SM6_Dt
MPC01	SM4_Dt
MPC02	SpAbs_B(e)
MPC03	SpPosLog_B(m)
MPC04	MPC01
MPC05	MWC01
MPC06	nBO
MPC07	SRW02
MPC08	SpPos_L
MPC09	SM6_B(m)
MPC10	BID
piPC01	Eta_beta
piPC02	SpPosLog_H2
piPC03	VR1_A
piPC04	Wi_B(e)
piPC05	SpPosLog_A
piPC06	Wi_Dt
piPC07	HyWi_B(i)
piPC08	VR3_D/Dt
piPC09	Eig13_AEA(ri)
piPC10	VR1_H2
TWC	ATS8p
TPC	ATS2v
piID	SpPos_X
PCR	SpAD_X
PCD	F05[C-C]
CID	HyWi_Dt
BID	Ho_B(i)
ISIZ	SM2_Dt
IAC	Ho_X
AAC	VR1_B(p)
IDE	Eig15_EA(ri)
IDM	SpPosLog_L
IDDE	ON1
IDDM	SM2_X
IDET	SM3_B(i)
IDMT	SM07_AEA(dm)
IVDE	Eig13_EA
IVDM	Eig14_AEA(ri)
HVcpx	SpPosLog_X
HDcpx	VR1_B(v)
Uindex	HyWi_B(e)
Vindex	SM5_B(e)
Xindex	SM6_B(e)
Yindex	VR3_A
IC0	ATS7p
IC1	Ho_B(e)
IC2	VR3_H2
IC3	VR3_B(p)
IC4	SM5_B(i)
IC5	SpMax4_Bh(m)
TIC0	VR3_B(v)
TIC1	EE_X
TIC2	SpMaxA_L
TIC3	SpPosLog_B(i)
TIC4	SM09_AEA(dm)
TIC5	Eig15_EA
SIC0	MDDD
SIC1	SM2_H2
SIC2	SM3_B(e)
SIC3	VE2_Dz(p)
SIC4	EE_A
SIC5	VR3_B(e)
CIC0	VR1_B(e)
CIC1	Eig13_EA(bo)
CIC2	nSK
CIC3	VR3_B(m)
CIC4	VR3_B(i)
CIC5	SpMaxA_AEA(ri)
BIC0	SpMaxA_X
BIC1	Eig08_AEA(bo)
BIC2	H_X
BIC3	VR1_B(m)
BIC4	SpPos_B(i)
BIC5	VR1_B(i)
J_A	SpPosLog_B(e)
SpPos_A	SM6_X
SpPosA_A	SM4_X
SpPosLog_A	ATS1m
SpMax_A	SM6_B(i)
SpMaxA_A	P_VSA_ppp_L
SpDiam_A	HyWi_H2
SpAD_A	Eig12_EA(bo)
SpMAD_A	SpAD_AEA(ri)
Ho_A	piPC05
EE_A	IDET
VE1_A	Chi_B(e)
VE2_A	SM04_AEA(bo)
VE3_A	Eig15_AEA(ri)
VE1sign_A	SM2_L
VE2sign_A	piPC04
VR1_A	Eig15_AEA(ed)
VR2_A	Chi_B(i)
VR3_A	SpPos_B(e)
Wi_D	Eig13_AEA(bo)
WiA_D	H_D/Dt
AVS_D	SpAD_EA
H_D	ATS8v
Chi_D	SpDiam_Dt
ChiA_D	ATSC8i
J_D	ATS6p
HyWi_D	ATSC7i
SpPos_D	Eig15_AEA(bo)
SpPosA_D	Eig14_AEA(bo)
SpPosLog_D	SM09_AEA(ri)
SpMax_D	Eig14_EA(ed)
SpMaxA_D	F04[C-C]
SpDiam_D	Wi_H2
SpAD_D	Eig15_EA(bo)
SpMAD_D	MWC02
Ho_D	ZM1
SM2_D	SpMaxA_EA
SM3_D	Eig11_AEA(bo)
SM4_D	SpMax3_Bh(p)
SM5_D	Chi_B(m)
SM6_D	GD
VE1_D	WiA_B(e)
VE2_D	ATSC8p
VE3_D	ATSC7p
VE1sign_D	SpPosLog_D
VE2sign_D	Eig14_EA(bo)
VR1_D	TPC
VR2_D	AVS_Dt
VR3_D	Eig12_AEA(bo)
Acon	Eig04_EA(bo)
QW_L	SM14_AEA(ri)
TI1_L	Eig12_EA(ri)
TI2_L	SRW04
STN_L	SM10_AEA(ri)
SpPos_L	Eig15_EA(ed)
SpPosA_L	SpAD_AEA(bo)
SpPosLog_L	SpMax4_Bh(p)
SpMax_L	WiA_B(i)
SpMaxA_L	Wap
SpDiam_L	ATS7v
SpAD_L	VE3_D
SpMAD_L	VE3_Dz(p)
Ho_L	SpAD_AEA(ed)
EE_L	SpAD_L
SM2_L	SpMaxA_AEA(ed)
SM3_L	ZM1Mad
SM4_L	SpMin4_Bh(v)
SM5_L	VE3_Dz(v)
SM6_L	SpMaxA_EA(ri)
AVS_X	VE3_D/Dt
H_X	Chi_B(v)
Chi_X	VE3_B(v)
ChiA_X	ZM2
J_X	MWC03
HyWi_X	Eig12_AEA(ri)
SpPos_X	Eig09_AEA(ri)
SpPosA_X	SpMaxA_A
SpPosLog_X	SpMax4_Bh(v)
SpMax_X	ATSC6i
SpMaxA_X	H_D
SpDiam_X	VE3_B(p)
SpAD_X	EE_H2
SpMAD_X	MPC10
Ho_X	SM05_AEA(bo)
EE_X	Eig14_AEA(ed)
SM2_X	piID
SM3_X	Eig09_EA
SM4_X	SM03_AEA(dm)
SM5_X	WiA_H2
SM6_X	VE3_Dz(e)
Wi_H2	VE3_Dz(Z)
WiA_H2	Chi0_EA(bo)
AVS_H2	Eig11_EA(bo)
Chi_H2	ATS2m
ChiA_H2	VE3_Dz(m)
J_H2	SpMax5_Bh(i)
HyWi_H2	BBI
SpPos_H2	MPC02
SpPosA_H2	SM1_B(i)
SpPosLog_H2	SM02_EA
SpMax_H2	SM3_L
SpMaxA_H2	SpAD_EA(ri)
SpDiam_H2	Eig09_AEA(bo)
SpAD_H2	Eig08_AEA(ri)
SpMAD_H2	SpPosLog_Dz(Z)
Ho_H2	SpPosLog_Dz(m)
EE_H2	SM02_AEA(dm)
SM2_H2	Eig08_EA
SM3_H2	SpMax5_Bh(v)
SM4_H2	SpPosLog_Dz(i)
SM5_H2	P_VSA_e_2
SM6_H2	Eig09_EA(ri)
VE1_H2	SM08_AEA(ri)
VE2_H2	Eig13_EA(ed)
VE3_H2	SpPosLog_Dz(e)
VE1sign_H2	Ho_D
VE2sign_H2	VE3_Dz(i)
VR1_H2	Xu
VR2_H2	IDM
VR3_H2	ZM2Mad
Wi_Dt	ATS6v
WiA_Dt	Chi_B(p)
AVS_Dt	ATS8m
H_Dt	Eig09_EA(bo)
Chi_Dt	SpMax8_Bh(m)
ChiA_Dt	VAR
J_Dt	LPRS
HyWi_Dt	SM06_AEA(dm)
SpPos_Dt	SpMax7_Bh(m)
SpPosA_Dt	Eig12_EA
SpPosLog_Dt	VE3_Dt
SpMax_Dt	SHED_LL
SpMaxA_Dt	SpPosLog_Dz(v)
SpDiam_Dt	SpPosLog_Dz(p)
SpAD_Dt	piPC10
SpMAD_Dt	ATS5p
Ho_Dt	SpMin4_Bh(p)
SM2_Dt	SM1_B(e)
SM3_Dt	SM3_H2
SM4_Dt	VvdwZAZ
SM5_Dt	QED
SM6_Dt	Ho_Dz(e)
VE1_Dt	Eig08_EA(ri)
VE2_Dt	SpMax5_Bh(e)
VE3_Dt	Ho_Dz(i)
VE1sign_Dt	SpMin4_Bh(m)
VE2sign_Dt	IDDM
VR1_Dt	SpPosLog_D/Dt
VR2_Dt	F03[C-C]
VR3_Dt	SpMaxA_AEA(bo)
Wi_D/Dt	HDcpx
WiA_D/Dt	SpMax5_Bh(p)
AVS_D/Dt	SRW06
H_D/Dt	MPC09
Chi_D/Dt	Eig11_EA(ed)
ChiA_D/Dt	SM06_AEA(ri)
J_D/Dt	SM07_AEA(ri)
HyWi_D/Dt	Eig12_EA(ed)
SpPos_D/Dt	ATSC5i
SpPosA_D/Dt	SpMin3_Bh(e)
SpPosLog_D/Dt	Eig10_EA(bo)
SpMax_D/Dt	SM4_H2
SpMaxA_D/Dt	MPC03
SpDiam_D/Dt	ATS7m
SpAD_D/Dt	SpMax6_Bh(m)
SpMAD_D/Dt	MWC04
Ho_D/Dt	Eig10_EA(ed)
EE_D/Dt	SM05_AEA(ri)
SM2_D/Dt	MeanDD
SM3_D/Dt	nBT
SM4_D/Dt	WiA_B(m)
SM5_D/Dt	SpAD_EA(ed)
SM6_D/Dt	STN_L
VE1_D/Dt	ATS3p
VE2_D/Dt	Eig10_AEA(bo)
VE3_D/Dt	TIC4
VE1sign_D/Dt	SM06_AEA(bo)
VE2sign_D/Dt	WiA_B(v)
VR1_D/Dt	Eig07_EA(bo)
VR2_D/Dt	piPC09
VR3_D/Dt	Eig11_AEA(ri)
Wi_Dz(Z)	SpMaxA_H2
WiA_Dz(Z)	SM04_AEA(ri)
AVS_Dz(Z)	Eig09_EA(ed)
H_Dz(Z)	SpMax8_Bh(p)
Chi_Dz(Z)	TIC5
ChiA_Dz(Z)	CATS2D_01_LL
J_Dz(Z)	TIC1
HyWi_Dz(Z)	QEDu
SpAbs_Dz(Z)	SpMin3_Bh(i)
SpPos_Dz(Z)	SAtot
SpPosA_Dz(Z)	Eta_R
SpPosLog_Dz(Z)	SpAD_AEA(dm)
SpMax_Dz(Z)	SpMaxA_B(i)
SpMaxA_Dz(Z)	ATSC8v
SpDiam_Dz(Z)	Eta_betaS
SpAD_Dz(Z)	SpMax3_Bh(v)
SpMAD_Dz(Z)	SpMaxA_B(e)
Ho_Dz(Z)	SpMax4_Bh(e)
EE_Dz(Z)	ATSC7v
SM1_Dz(Z)	TIC3
SM2_Dz(Z)	SM4_L
SM3_Dz(Z)	ATS5v
SM4_Dz(Z)	GMTI
SM5_Dz(Z)	ATS4p
SM6_Dz(Z)	ATS1e
VE1_Dz(Z)	ATSC6p
VE2_Dz(Z)	Dz
VE3_Dz(Z)	SM02_EA(ri)
VE1sign_Dz(Z)	Eig10_EA(ri)
VE2sign_Dz(Z)	SM04_AEA(dm)
VR1_Dz(Z)	Eig10_EA
VR2_Dz(Z)	nAT
VR3_Dz(Z)	ISIZ
Wi_Dz(m)	Eig10_AEA(ri)
WiA_Dz(m)	TRS
AVS_Dz(m)	Ho_Dz(Z)
H_Dz(m)	Eig13_AEA(ed)
Chi_Dz(m)	Eig11_EA(ri)
ChiA_Dz(m)	SpMin5_Bh(i)
J_Dz(m)	SMTI
HyWi_Dz(m)	Eig11_EA
SpAbs_Dz(m)	SM05_AEA(dm)
SpPos_Dz(m)	CATS2D_02_LL
SpPosA_Dz(m)	MPC05
SpPosLog_Dz(m)	IDMT
SpMax_Dz(m)	Ho_Dz(m)
SpMaxA_Dz(m)	F10[C-C]
SpDiam_Dz(m)	MWC05
SpAD_Dz(m)	ATS3v
SpMAD_Dz(m)	SpMax7_Bh(v)
Ho_Dz(m)	TI1_L
EE_Dz(m)	SpMin5_Bh(e)
SM1_Dz(m)	P_VSA_m_2
SM2_Dz(m)	SpMax3_Bh(i)
SM3_Dz(m)	SpMax4_Bh(i)
SM4_Dz(m)	S1K
SM5_Dz(m)	nCsp2
SM6_Dz(m)	ATSC4i
VE1_Dz(m)	ATS1i
VE2_Dz(m)	SM02_AEA(ed)
VE3_Dz(m)	SM06_EA(bo)
VE1sign_Dz(m)	SpMin8_Bh(e)
VE2sign_Dz(m)	MPC08
VR1_Dz(m)	ATSC8m
VR2_Dz(m)	piPC06
VR3_Dz(m)	Wi_D
Wi_Dz(v)	Se
WiA_Dz(v)	SpMin8_Bh(i)
AVS_Dz(v)	MPC04
H_Dz(v)	Pol
Chi_Dz(v)	SpMaxA_B(v)
ChiA_Dz(v)	MaxaaCH
J_Dz(v)	D/Dtr06
HyWi_Dz(v)	SRW08
SpAbs_Dz(v)	SM15_AEA(ri)
SpPos_Dz(v)	Eig05_EA(bo)
SpPosA_Dz(v)	SpMin3_Bh(v)
SpPosLog_Dz(v)	WiA_B(p)
SpMax_Dz(v)	SpMAD_Dt
SpMaxA_Dz(v)	SpPosA_Dt
SpDiam_Dz(v)	IDDE
SpAD_Dz(v)	nCar
SpMAD_Dz(v)	SM07_AEA(bo)
Ho_Dz(v)	SpMaxA_B(p)
SM1_Dz(v)	Eig10_AEA(ed)
SM2_Dz(v)	P_VSA_s_4
SM3_Dz(v)	SM3_D
SM4_Dz(v)	EE_L
SM5_Dz(v)	ATSC2p
SM6_Dz(v)	ON0V
VE1_Dz(v)	SpMax8_Bh(v)
VE2_Dz(v)	ATS6m
VE3_Dz(v)	Si
VE1sign_Dz(v)	ATS3m
VE2sign_Dz(v)	SpMax7_Bh(p)
VR1_Dz(v)	Eig06_AEA(bo)
VR2_Dz(v)	ATS4v
VR3_Dz(v)	Eig12_AEA(ed)
Wi_Dz(e)	piPC08
WiA_Dz(e)	SpAD_D
AVS_Dz(e)	SpPos_D
H_Dz(e)	SpMin3_Bh(p)
Chi_Dz(e)	Eig09_AEA(ed)
ChiA_Dz(e)	Eta_F
J_Dz(e)	Eig06_EA(ed)
HyWi_Dz(e)	SM15_AEA(dm)
SpAbs_Dz(e)	SM03_EA(bo)
SpPos_Dz(e)	SpMaxA_Dt
SpPosA_Dz(e)	SpMin2_Bh(m)
SpPosLog_Dz(e)	CATS2D_07_LL
SpMax_Dz(e)	QW_L
SpMaxA_Dz(e)	CATS2D_03_LL
SpDiam_Dz(e)	Eig15_AEA(dm)
SpAD_Dz(e)	MPC07
SpMAD_Dz(e)	VE2_D/Dt
Ho_Dz(e)	SpMax3_Bh(e)
EE_Dz(e)	MPC06
SM1_Dz(e)	ATSC3i
SM2_Dz(e)	SM5_H2
SM3_Dz(e)	SM5_D
SM4_Dz(e)	Eig06_AEA(ed)
SM5_Dz(e)	SpMin1_Bh(e)
SM6_Dz(e)	Eig06_EA
VE1_Dz(e)	SM14_AEA(bo)
VE2_Dz(e)	ATSC5p
VE3_Dz(e)	CATS2D_08_LL
VE1sign_Dz(e)	ON0
VE2sign_Dz(e)	CIC0
VR1_Dz(e)	SpMin2_Bh(i)
VR2_Dz(e)	MWC06
VR3_Dz(e)	SM03_AEA(ri)
Wi_Dz(p)	Eig08_EA(ed)
WiA_Dz(p)	SpMax_D
AVS_Dz(p)	Eig06_EA(bo)
H_Dz(p)	piPC07
Chi_Dz(p)	SpMin2_Bh(e)
ChiA_Dz(p)	SM6_D
J_Dz(p)	SpMin2_Bh(v)
HyWi_Dz(p)	SpMax7_Bh(e)
SpAbs_Dz(p)	SpMax7_Bh(i)
SpPos_Dz(p)	P_VSA_MR_6
SpPosA_Dz(p)	MaxDD
SpPosLog_Dz(p)	ATSC2i
SpMax_Dz(p)	ATSC1p
SpMaxA_Dz(p)	nR06
SpDiam_Dz(p)	TIC2
SpAD_Dz(p)	Eta_epsi
SpMAD_Dz(p)	Eig07_AEA(bo)
Ho_Dz(p)	SpMax1_Bh(p)
SM1_Dz(p)	SM5_L
SM2_Dz(p)	SM4_D
SM3_Dz(p)	nBM
SM4_Dz(p)	Uc
SM5_Dz(p)	ATS8e
SM6_Dz(p)	SpMax1_Bh(v)
VE1_Dz(p)	ATSC6v
VE2_Dz(p)	Ho_Dz(v)
VE3_Dz(p)	Rperim
VE1sign_Dz(p)	S2K
VE2sign_Dz(p)	Chi1_EA(bo)
VR1_Dz(p)	Eta_D_psiA
VR2_Dz(p)	Eta_psi1
VR3_Dz(p)	Eig07_EA
Wi_Dz(i)	SM15_AEA(bo)
WiA_Dz(i)	SM08_AEA(bo)
AVS_Dz(i)	ATS5m
H_Dz(i)	ATS8i
Chi_Dz(i)	SpMin3_Bh(m)
ChiA_Dz(i)	Eig05_AEA(bo)
J_Dz(i)	SMTIV
HyWi_Dz(i)	SpMin8_Bh(v)
SpAbs_Dz(i)	HyWi_D
SpPos_Dz(i)	ATSC1i
SpPosA_Dz(i)	SpMax8_Bh(i)
SpPosLog_Dz(i)	Wi_Dz(m)
SpMax_Dz(i)	Wi_Dz(Z)
SpMaxA_Dz(i)	ATS4m
SpDiam_Dz(i)	ATSC7m
SpAD_Dz(i)	SpMin7_Bh(i)
SpMAD_Dz(i)	Wi_Dz(i)
Ho_Dz(i)	SRW10
EE_Dz(i)	SM6_H2
SM1_Dz(i)	Eig11_AEA(ed)
SM2_Dz(i)	SM2_D
SM3_Dz(i)	Eig14_AEA(dm)
SM4_Dz(i)	Wi_Dz(e)
SM5_Dz(i)	ChiA_Dt
SM6_Dz(i)	Eig04_AEA(bo)
VE1_Dz(i)	SM05_EA(bo)
VE2_Dz(i)	MWC07
VE3_Dz(i)	nAB
VE1sign_Dz(i)	ATSC3p
VE2sign_Dz(i)	SpMin7_Bh(e)
VR1_Dz(i)	ZM2V
VR2_Dz(i)	SpMin1_Bh(i)
VR3_Dz(i)	SpMax2_Bh(p)
Wi_B(m)	Eta_FL
WiA_B(m)	IAC
AVS_B(m)	TIC0
Chi_B(m)	SpMin5_Bh(p)
ChiA_B(m)	Eig08_AEA(ed)
J_B(m)	SpMax8_Bh(e)
HyWi_B(m)	SM04_EA
SpAbs_B(m)	VE1_D
SpPos_B(m)	Eig06_AEA(ri)
SpPosA_B(m)	Ui
SpPosLog_B(m)	ATSC4p
SpMax_B(m)	ON1V
SpMaxA_B(m)	SpMax6_Bh(v)
SpDiam_B(m)	nCIC
SpAD_B(m)	Eig07_EA(ed)
SpMAD_B(m)	SM02_AEA(ri)
Ho_B(m)	ZM2MulPer
EE_B(m)	Eig04_EA
SM1_B(m)	SM12_AEA(bo)
SM2_B(m)	ATS7e
SM3_B(m)	O%
SM4_B(m)	SpMin5_Bh(v)
SM5_B(m)	Eig07_AEA(ri)
SM6_B(m)	Eig05_EA
VE1_B(m)	SM13_AEA(bo)
VE2_B(m)	CSI
VE3_B(m)	CATS2D_06_LL
VE1sign_B(m)	SpMax6_Bh(p)
VE2sign_B(m)	ZM2Per
VR1_B(m)	Eta_D_epsiC
VR2_B(m)	Eta_betaP
VR3_B(m)	Wi_Dz(v)
Wi_B(v)	SpMin5_Bh(m)
WiA_B(v)	Eig07_AEA(ed)
AVS_B(v)	Qindex
Chi_B(v)	SM03_AEA(ed)
ChiA_B(v)	SpMin1_Bh(v)
J_B(v)	P_VSA_MR_1
HyWi_B(v)	VE2_B(p)
SpAbs_B(v)	AVS_D
SpPos_B(v)	SpMax6_Bh(i)
SpPosA_B(v)	SpMin1_Bh(p)
SpPosLog_B(v)	ATS7i
SpMax_B(v)	SpMin8_Bh(p)
SpMaxA_B(v)	SpMax2_Bh(v)
SpDiam_B(v)	nAA
SpAD_B(v)	ATSC5v
SpMAD_B(v)	SpMin6_Bh(e)
Ho_B(v)	ECC
EE_B(v)	SM3_Dz(i)
SM1_B(v)	SpMax6_Bh(e)
SM2_B(v)	J_X
SM3_B(v)	SpMin6_Bh(i)
SM4_B(v)	Wi_Dz(p)
SM5_B(v)	SM3_Dz(Z)
SM6_B(v)	SM3_Dz(m)
VE1_B(v)	SM3_Dz(e)
VE2_B(v)	SpMaxA_EA(dm)
VE3_B(v)	MWC08
VE1sign_B(v)	SaaCH
VE2sign_B(v)	WiA_Dt
VR1_B(v)	SM6_L
VR2_B(v)	SpMaxA_B(m)
VR3_B(v)	SpAbs_Dz(i)
Wi_B(e)	SpAD_Dz(i)
WiA_B(e)	SpPos_Dz(i)
AVS_B(e)	ATS2e
Chi_B(e)	VE1_Dz(p)
ChiA_B(e)	SpPos_Dz(Z)
J_B(e)	SpPos_Dz(m)
HyWi_B(e)	SpAD_Dz(m)
SpAbs_B(e)	SpAD_Dz(Z)
SpPos_B(e)	SpAbs_Dz(Z)
SpPosA_B(e)	VE1_H2
SpPosLog_B(e)	SpAbs_Dz(m)
SpMax_B(e)	SpAbs_Dz(e)
SpMaxA_B(e)	SM02_EA(ed)
SpDiam_B(e)	Eta_epsi_4
SpAD_B(e)	SpAD_Dz(e)
SpMAD_B(e)	SpPos_Dz(e)
Ho_B(e)	SpMin6_Bh(m)
EE_B(e)	Eig04_AEA(ri)
SM1_B(e)	SpDiam_D
SM2_B(e)	SM5_Dz(i)
SM3_B(e)	SaasC
SM4_B(e)	Eig05_AEA(ri)
SM5_B(e)	VE1_Dz(v)
SM6_B(e)	SM5_Dz(Z)
VE1_B(e)	SM5_Dz(m)
VE2_B(e)	Ho_Dz(p)
VE3_B(e)	SpMin6_Bh(v)
VE1sign_B(e)	nCIR
VE2sign_B(e)	SpMin7_Bh(m)
VR1_B(e)	SM5_Dz(e)
VR2_B(e)	Eig07_EA(ri)
VR3_B(e)	SpMin7_Bh(v)
Wi_B(p)	EE_Dz(i)
WiA_B(p)	SpMax_Dz(i)
AVS_B(p)	SpMaxA_EA(ed)
Chi_B(p)	EE_Dz(m)
ChiA_B(p)	SpMax_Dz(m)
J_B(p)	SpMax_Dz(Z)
HyWi_B(p)	EE_Dz(Z)
SpAbs_B(p)	SM6_Dz(i)
SpPos_B(p)	Eta_C
SpPosA_B(p)	SpMax_Dz(e)
SpPosLog_B(p)	EE_Dz(e)
SpMax_B(p)	VE1_A
SpMaxA_B(p)	SpMax3_Bh(m)
SpDiam_B(p)	SpMin7_Bh(p)
SpAD_B(p)	Eta_epsi_2
SpMAD_B(p)	J_A
Ho_B(p)	SM6_Dz(Z)
EE_B(p)	SM6_Dz(m)
SM1_B(p)	SpMin2_Bh(p)
SM2_B(p)	SM6_Dz(e)
SM3_B(p)	ATS6e
SM4_B(p)	GMTIV
SM5_B(p)	MWC09
SM6_B(p)	SpMin1_Bh(m)
VE1_B(p)	SM08_EA(bo)
VE2_B(p)	CATS2D_05_LL
VE3_B(p)	SM4_Dz(i)
VE1sign_B(p)	SpMin8_Bh(m)
VE2sign_B(p)	SM4_Dz(Z)
VR1_B(p)	SM4_Dz(m)
VR2_B(p)	VE1_D/Dt
VR3_B(p)	VE1_Dz(Z)
Wi_B(i)	VE1_Dz(m)
WiA_B(i)	J_B(e)
AVS_B(i)	VE2_B(v)
Chi_B(i)	ATS6i
ChiA_B(i)	ATS2i
J_B(i)	SM4_Dz(e)
HyWi_B(i)	TWC
SpAbs_B(i)	J_B(i)
SpPos_B(i)	VE1_Dz(e)
SpPosA_B(i)	J_B(m)
SpPosLog_B(i)	SpMax1_Bh(e)
SpMax_B(i)	VE1_B(m)
SpMaxA_B(i)	Eig06_EA(ri)
SpDiam_B(i)	SpMax1_Bh(i)
SpAD_B(i)	SM3_Dz(v)
SpMAD_B(i)	ZM2Kup
Ho_B(i)	GGI9
EE_B(i)	HyWi_Dz(m)
SM1_B(i)	HyWi_Dz(Z)
SM2_B(i)	HyWi_Dz(i)
SM3_B(i)	SpAD_Dz(v)
SM4_B(i)	SpPos_Dz(v)
SM5_B(i)	VE2_H2
SM6_B(i)	HyWi_Dz(e)
VE1_B(i)	GGI8
VE2_B(i)	SM04_EA(ri)
VE3_B(i)	SpAbs_Dz(v)
VE1sign_B(i)	ATSC1v
VE2sign_B(i)	Chi_Dt
VR1_B(i)	C-024
VR2_B(i)	P_VSA_charge_6
VR3_B(i)	SpMaxA_EA(bo)
ATS1m	MWC10
ATS2m	ATSC3v
ATS3m	SM2_Dz(Z)
ATS4m	SM2_Dz(m)
ATS5m	SpMin6_Bh(p)
ATS6m	VE2_A
ATS7m	J_B(v)
ATS8m	SM2_Dz(i)
ATS1v	BIC0
ATS2v	SM5_Dz(v)
ATS3v	Eig05_EA(ri)
ATS4v	SM2_Dz(e)
ATS5v	ATSC4v
ATS6v	IC4
ATS7v	VE1_Dz(i)
ATS8v	J_H2
ATS1e	SpPos_Dz(p)
ATS2e	ATSC2v
ATS3e	SM07_EA(bo)
ATS4e	SpAD_Dz(p)
ATS5e	SpMax_Dz(v)
ATS6e	ATS5e
ATS7e	CATS2D_09_LL
ATS8e	SM6_Dz(v)
ATS1p	SM3_Dz(p)
ATS2p	IC5
ATS3p	SpAbs_Dz(p)
ATS4p	ATS5i
ATS5p	SM14_AEA(dm)
ATS6p	Eig05_EA(ed)
ATS7p	SpPos_D/Dt
ATS8p	SpAD_D/Dt
ATS1i	P_VSA_p_1
ATS2i	J_B(p)
ATS3i	SM4_Dz(v)
ATS4i	Eig13_AEA(dm)
ATS5i	ATSC6m
ATS6i	AVS_Dz(Z)
ATS7i	AVS_Dz(m)
ATS8i	AVS_Dz(i)
ATSC1m	Wi_D/Dt
ATSC2m	nH
ATSC3m	NaaCH
ATSC4m	SM04_AEA(ed)
ATSC5m	AVS_Dz(e)
ATSC6m	HyWi_Dz(v)
ATSC7m	SM5_Dz(p)
ATSC8m	nBnz
ATSC1v	SpMax_Dz(p)
ATSC2v	VE1_Dt
ATSC3v	Eta_L
ATSC4v	SM6_Dz(p)
ATSC5v	P_VSA_ppp_cyc
ATSC6v	Ho_D/Dt
ATSC7v	ATSC5m
ATSC8v	SM2_Dz(v)
ATSC1e	ZM1Per
ATSC2e	Eig04_EA(ed)
ATSC3e	SM13_AEA(dm)
ATSC4e	Eig04_AEA(ed)
ATSC5e	PHI
ATSC6e	SM4_Dz(p)
ATSC7e	Ram
ATSC8e	Eig04_EA(ri)
ATSC1p	F07[C-N]
ATSC2p	Eig12_AEA(dm)
ATSC3p	HyWi_Dz(p)
ATSC4p	ATS3e
ATSC5p	P_VSA_s_2
ATSC6p	P_VSA_LogP_7
ATSC7p	Uindex
ATSC8p	P_VSA_e_1
ATSC1i	P_VSA_v_1
ATSC2i	P_VSA_m_1
ATSC3i	SpMax_H2
ATSC4i	SIC0
ATSC5i	H-047
ATSC6i	SpDiam_Dz(m)
ATSC7i	SpDiam_Dz(Z)
ATSC8i	SM2_Dz(p)
MATS1m	SpDiam_Dz(i)
MATS2m	SpDiam_Dz(e)
MATS3m	VE1_B(e)
MATS4m	ATS3i
MATS5m	AVS_Dz(v)
MATS6m	Eig11_AEA(dm)
MATS7m	Eta_epsi_5
MATS8m	SM10_EA(bo)
MATS1v	C-025
MATS2v	GGI7
MATS3v	ATS4e
MATS4v	H_Dt
MATS5v	SpDiam_H2
MATS6v	SM13_AEA(ri)
MATS7v	Eig03_EA(bo)
MATS8v	VE1_B(i)
MATS1e	Eig05_AEA(ed)
MATS2e	VE2sign_B(v)
MATS3e	SM09_EA(bo)
MATS4e	nCbH
MATS5e	SpDiam_Dz(v)
MATS6e	ATS4i
MATS7e	IC3
MATS8e	AVS_Dz(p)
MATS1p	ChiA_D
MATS2p	P_VSA_charge_9
MATS3p	F08[C-N]
MATS4p	MeanTD
MATS5p	Eig10_AEA(dm)
MATS6p	SpMAD_EA(dm)
MATS7p	SpDiam_Dz(p)
MATS8p	P_VSA_ppp_ar
MATS1i	P_VSA_LogP_3
MATS2i	ATSC3m
MATS3i	HyWi_D/Dt
MATS4i	ZM1V
MATS5i	nCb-
MATS6i	Eig03_EA
MATS7i	SM11_AEA(bo)
MATS8i	PCD
GATS1m	ATSC2m
GATS2m	SpDiam_B(p)
GATS3m	GGI10
GATS4m	SM05_AEA(ed)
GATS5m	Eig08_AEA(dm)
GATS6m	Eig03_EA(ed)
GATS7m	SM12_AEA(dm)
GATS8m	GGI6
GATS1v	Eta_alpha_A
GATS2v	VE2sign_B(m)
GATS3v	Eta_D_AlphaB
GATS4v	ATSC4m
GATS5v	SpMAD_D
GATS6v	SpPosA_D
GATS7v	ATSC1m
GATS8v	SM06_EA
GATS1e	CATS2D_04_LL
GATS2e	GGI4
GATS3e	ZM1MulPer
GATS4e	SpDiam_B(v)
GATS5e	VE2sign_B(p)
GATS6e	AVS_H2
GATS7e	MaxaasC
GATS8e	Eig02_EA(bo)
GATS1p	SM12_AEA(ri)
GATS2p	Eig03_AEA(ri)
GATS3p	SM12_EA(bo)
GATS4p	CATS2D_03_AL
GATS5p	SM11_EA(bo)
GATS6p	Eig03_AEA(ed)
GATS7p	GGI5
GATS8p	RBN
GATS1i	SpMaxA_D
GATS2i	VE2sign_B(i)
GATS3i	SpMax2_Bh(m)
GATS4i	MDEC-33
GATS5i	P_VSA_ppp_con
GATS6i	Eig09_AEA(dm)
GATS7i	SM03_EA
GATS8i	Eig03_AEA(bo)
GGI1	GGI2
GGI2	Acon
GGI3	CIC1
GGI4	VE2sign_B(e)
GGI5	J_D/Dt
GGI6	SpMax2_Bh(e)
GGI7	Me
GGI8	SpDiam_B(m)
GGI9	UNIP
GGI10	CIC2
JGI1	SpMax_B(p)
JGI2	SpMax_B(v)
JGI3	S3K
JGI4	Xindex
JGI5	F06[C-N]
JGI6	SM13_EA(bo)
JGI7	NaasC
JGI8	SM14_EA(bo)
JGI9	Eig03_EA(ri)
JGI10	CATS2D_09_AL
JGT	SHED_AL
SpMax1_Bh(m)	SM06_AEA(ed)
SpMax2_Bh(m)	ICR
SpMax3_Bh(m)	SM06_EA(ri)
SpMax4_Bh(m)	F04[C-N]
SpMax5_Bh(m)	LDI
SpMax6_Bh(m)	ChiA_Dz(i)
SpMax7_Bh(m)	ChiA_Dz(Z)
SpMax8_Bh(m)	ChiA_Dz(m)
SpMax1_Bh(v)	CATS2D_08_AL
SpMax2_Bh(v)	Eig07_AEA(dm)
SpMax3_Bh(v)	F05[C-N]
SpMax4_Bh(v)	ChiA_Dz(e)
SpMax5_Bh(v)	Eig02_AEA(bo)
SpMax6_Bh(v)	Qmean
SpMax7_Bh(v)	SM05_EA
SpMax8_Bh(v)	SM15_EA(bo)
SpMax1_Bh(e)	SpDiam_B(e)
SpMax2_Bh(e)	SM2_D/Dt
SpMax3_Bh(e)	MaxTD
SpMax4_Bh(e)	VE2_B(e)
SpMax5_Bh(e)	Chi1_EA(dm)
SpMax6_Bh(e)	AVS_B(p)
SpMax7_Bh(e)	SpMax2_Bh(i)
SpMax8_Bh(e)	ChiA_Dz(v)
SpMax1_Bh(p)	CATS2D_06_AL
SpMax2_Bh(p)	SpMax1_Bh(m)
SpMax3_Bh(p)	Chi0_EA(dm)
SpMax4_Bh(p)	MSD
SpMax5_Bh(p)	ChiA_Dz(p)
SpMax6_Bh(p)	SpDiam_B(i)
SpMax7_Bh(p)	SpDiam_D/Dt
SpMax8_Bh(p)	CATS2D_04_AL
SpMax1_Bh(i)	VE2_B(i)
SpMax2_Bh(i)	MAXDP
SpMax3_Bh(i)	F03[C-N]
SpMax4_Bh(i)	VE1sign_B(v)
SpMax5_Bh(i)	WiA_D
SpMax6_Bh(i)	Vindex
SpMax7_Bh(i)	SM03_EA(ri)
SpMax8_Bh(i)	P_VSA_i_3
SpMin1_Bh(m)	CATS2D_05_AL
SpMin2_Bh(m)	DECC
SpMin3_Bh(m)	VE1_B(v)
SpMin4_Bh(m)	VE2sign_H2
SpMin5_Bh(m)	ChiA_H2
SpMin6_Bh(m)	Eta_B
SpMin7_Bh(m)	SM04_EA(ed)
SpMin8_Bh(m)	Qpos
SpMin1_Bh(v)	Qtot
SpMin2_Bh(v)	SM07_AEA(ed)
SpMin3_Bh(v)	Qneg
SpMin4_Bh(v)	GGI1
SpMin5_Bh(v)	VE2sign_A
SpMin6_Bh(v)	PCR
SpMin7_Bh(v)	SM3_D/Dt
SpMin8_Bh(v)	SM4_D/Dt
SpMin1_Bh(e)	SM5_D/Dt
SpMin2_Bh(e)	SM6_D/Dt
SpMin3_Bh(e)	EE_D/Dt
SpMin4_Bh(e)	SpMax_D/Dt
SpMin5_Bh(e)	SM03_EA(ed)
SpMin6_Bh(e)	minssCH2
SpMin7_Bh(e)	MATS3e
SpMin8_Bh(e)	ZM1Kup
SpMin1_Bh(p)	Eig02_EA(ri)
SpMin2_Bh(p)	VE2_B(m)
SpMin3_Bh(p)	NRS
SpMin4_Bh(p)	SpPosA_B(p)
SpMin5_Bh(p)	SHED_DL
SpMin6_Bh(p)	SpDiam_A
SpMin7_Bh(p)	BIC2
SpMin8_Bh(p)	AECC
SpMin1_Bh(i)	SM08_EA
SpMin2_Bh(i)	SpMAD_Dz(Z)
SpMin3_Bh(i)	J_Dt
SpMin4_Bh(i)	SpPosA_Dz(Z)
SpMin5_Bh(i)	SpMAD_Dz(m)
SpMin6_Bh(i)	SpPosA_Dz(m)
SpMin7_Bh(i)	F09[C-N]
SpMin8_Bh(i)	Eta_D_epsiA
P_VSA_LogP_1	SpMAD_Dz(i)
P_VSA_LogP_2	BIC1
P_VSA_LogP_3	SpPosA_Dz(i)
P_VSA_LogP_4	SpMAD_Dz(e)
P_VSA_LogP_5	SM07_EA
P_VSA_LogP_6	VE1sign_B(m)
P_VSA_LogP_7	VE1sign_B(p)
P_VSA_LogP_8	SpPosA_Dz(e)
P_VSA_MR_1	AVS_B(v)
P_VSA_MR_2	P_VSA_s_3
P_VSA_MR_3	SM05_EA(ri)
P_VSA_MR_4	SssCH2
P_VSA_MR_5	SpMaxA_Dz(Z)
P_VSA_MR_6	SpMaxA_Dz(m)
P_VSA_MR_7	SM11_AEA(dm)
P_VSA_MR_8	Eig02_EA(ed)
P_VSA_m_1	Eig06_AEA(dm)
P_VSA_m_2	Eig02_AEA(ed)
P_VSA_m_3	RPCG
P_VSA_m_4	Eig02_AEA(ri)
P_VSA_m_5	VE1_B(p)
P_VSA_v_1	SpDiam_EA(bo)
P_VSA_v_2	SpMaxA_Dz(i)
P_VSA_v_3	SpMaxA_Dz(e)
P_VSA_v_4	AVS_D/Dt
P_VSA_e_1	SIC2
P_VSA_e_2	SM08_AEA(ed)
P_VSA_e_3	DBI
P_VSA_e_4	Eta_epsi_A
P_VSA_e_5	SM08_EA(ri)
P_VSA_e_6	VE1sign_B(i)
P_VSA_p_1	VR2_Dz(e)
P_VSA_p_2	VR2_Dz(Z)
P_VSA_p_3	VR2_Dz(m)
P_VSA_p_4	VR2_Dz(i)
P_VSA_i_1	VR2_D
P_VSA_i_2	VR2_Dz(v)
P_VSA_i_3	VR2_B(p)
P_VSA_i_4	VR2_Dz(p)
P_VSA_s_1	VR2_A
P_VSA_s_2	VR2_Dt
P_VSA_s_3	VR2_H2
P_VSA_s_4	VR2_B(v)
P_VSA_s_5	SIC1
P_VSA_s_6	GATS4m
P_VSA_ppp_L	SM10_AEA(bo)
P_VSA_ppp_P	Eig02_EA
P_VSA_ppp_N	Eig01_EA(bo)
P_VSA_ppp_D	SpMax_EA(bo)
P_VSA_ppp_A	SM11_AEA(ri)
P_VSA_ppp_ar	VE1sign_B(e)
P_VSA_ppp_con	F04[O-O]
P_VSA_ppp_hal	VR2_B(e)
P_VSA_ppp_cyc	VR2_B(i)
P_VSA_ppp_ter	ChiA_B(p)
P_VSA_charge_1	MaxssCH2
P_VSA_charge_2	GATS3e
P_VSA_charge_3	VR2_B(m)
P_VSA_charge_4	Yindex
P_VSA_charge_5	P_VSA_LogP_5
P_VSA_charge_6	gmax
P_VSA_charge_7	VR2_D/Dt
P_VSA_charge_8	JGI3
P_VSA_charge_9	SM07_EA(ri)
P_VSA_charge_10	SpMAD_H2
P_VSA_charge_11	SpPosA_H2
P_VSA_charge_12	B04[O-O]
P_VSA_charge_13	SM09_AEA(ed)
P_VSA_charge_14	SpMAD_Dz(v)
Eta_alpha	ChiA_D/Dt
Eta_alpha_A	SpPosA_Dz(v)
Eta_epsi	GATS3m
Eta_epsi_A	SM09_EA
Eta_betaS	WiA_Dz(Z)
Eta_betaS_A	WiA_Dz(m)
Eta_betaP	WiA_D/Dt
Eta_betaP_A	Chi_D
Eta_beta	PDI
Eta_beta_A	SM10_EA
Eta_C	SpMax_AEA(bo)
Eta_C_A	Eig01_AEA(bo)
Eta_L	CATS2D_02_AL
Eta_L_A	SpMax_B(e)
Eta_R	WiA_Dz(e)
Eta_F	WiA_Dz(i)
Eta_F_A	CATS2D_07_AL
Eta_LR	C%
Eta_FL	SpMAD_AEA(dm)
Eta_FL_A	J_D
Eta_B	F10[C-N]
Eta_B_A	qnmax
Eta_sh_p	ARR
Eta_sh_y	SpMaxA_Dz(v)
Eta_sh_x	IDE
Eta_D_AlphaA	SM10_AEA(ed)
Eta_D_AlphaB	IC0
Eta_epsi_2	AAC
Eta_epsi_3	SM05_EA(ed)
Eta_epsi_4	SpMax_B(i)
Eta_epsi_5	SpPosA_B(v)
Eta_D_epsiA	F01[C-N]
Eta_D_epsiB	P_VSA_charge_2
Eta_D_epsiC	Chi_D/Dt
Eta_D_epsiD	P_VSA_charge_13
Eta_psi1	SpPosA_Dz(p)
Eta_D_psiA	SpMAD_Dz(p)
Eta_D_psiB	SM10_EA(ri)
Eta_D_beta	GNar
Eta_D_beta_A	SM09_EA(ri)
SpMax_EA	AP
SpMaxA_EA	F05[O-O]
SpDiam_EA	SpMax_B(m)
SpAD_EA	SM06_EA(ed)
SpMAD_EA	MATS3m
SpMax_EA(ed)	HNar
SpMaxA_EA(ed)	SM11_AEA(ed)
SpDiam_EA(ed)	SM11_EA
SpAD_EA(ed)	SpMaxA_D/Dt
SpMAD_EA(ed)	HVcpx
SpMax_EA(bo)	SAscore
SpMaxA_EA(bo)	GATS7i
SpDiam_EA(bo)	Eig05_AEA(dm)
SpAD_EA(bo)	max_conj_path
SpMAD_EA(bo)	SpMax_A
SpMax_EA(dm)	GGI3
SpMaxA_EA(dm)	F02[N-O]
SpDiam_EA(dm)	TIE
SpAD_EA(dm)	SaaaC
SpMAD_EA(dm)	SM12_EA
SpMax_EA(ri)	PW5
SpMaxA_EA(ri)	Mi
SpDiam_EA(ri)	minaaCH
SpAD_EA(ri)	CIC3
SpMAD_EA(ri)	ChiA_B(v)
SpMax_AEA(ed)	SpMaxA_Dz(p)
SpMaxA_AEA(ed)	MaxaaN
SpDiam_AEA(ed)	CATS2D_05_DA
SpAD_AEA(ed)	SpPosA_L
SpMAD_AEA(ed)	SM12_AEA(ed)
SpMax_AEA(bo)	VE1sign_A
SpMaxA_AEA(bo)	Eta_F_A
SpDiam_AEA(bo)	P_VSA_charge_7
SpAD_AEA(bo)	NaaaC
SpMAD_AEA(bo)	Eta_epsi_3
SpMax_AEA(dm)	SpDiam_EA(dm)
SpMaxA_AEA(dm)	WiA_Dz(v)
SpDiam_AEA(dm)	MaxaaaC
SpAD_AEA(dm)	VE1sign_H2
SpMAD_AEA(dm)	MaxdO
SpMax_AEA(ri)	SM11_EA(ri)
SpMaxA_AEA(ri)	MaxsssN
SpDiam_AEA(ri)	Eta_C_A
SpAD_AEA(ri)	minaaaC
SpMAD_AEA(ri)	MATS1v
Chi0_EA	SM12_EA(ri)
Chi1_EA	SM13_EA
Chi0_EA(ed)	SM12_EA(dm)
Chi1_EA(ed)	SpDiam_AEA(bo)
Chi0_EA(bo)	Eta_D_epsiD
Chi1_EA(bo)	SM14_EA(dm)
Chi0_EA(dm)	SM06_EA(dm)
Chi1_EA(dm)	SM13_AEA(ed)
Chi0_EA(ri)	SPI
Chi1_EA(ri)	SM10_EA(dm)
Chi0_AEA(ed)	SM08_EA(dm)
Chi1_AEA(ed)	Eig01_EA(dm)
Chi0_AEA(bo)	SpMax_EA(dm)
Chi1_AEA(bo)	SM04_EA(dm)
Chi0_AEA(dm)	minsssN
Chi1_AEA(dm)	SM07_EA(ed)
Chi0_AEA(ri)	CATS2D_09_DL
Chi1_AEA(ri)	SM14_EA
SM02_EA	SM14_AEA(ed)
SM03_EA	SpMAD_A
SM04_EA	SpPosA_A
SM05_EA	JGT
SM06_EA	Rbrid
SM07_EA	P_VSA_charge_3
SM08_EA	AVS_X
SM09_EA	SM13_EA(ri)
SM10_EA	MaxsssCH
SM11_EA	SM15_EA
SM12_EA	B05[O-O]
SM13_EA	SM08_EA(ed)
SM14_EA	MaxssNH
SM15_EA	SM15_AEA(ed)
SM02_EA(ed)	WiA_Dz(p)
SM03_EA(ed)	minaaN
SM04_EA(ed)	SM14_EA(ri)
SM05_EA(ed)	AVS_B(m)
SM06_EA(ed)	GATS2i
SM07_EA(ed)	GATS1i
SM08_EA(ed)	GATS7p
SM09_EA(ed)	MDEO-12
SM10_EA(ed)	MATS4m
SM11_EA(ed)	SpMAD_B(m)
SM12_EA(ed)	MATS1p
SM13_EA(ed)	minssNH
SM14_EA(ed)	SM15_EA(ri)
SM15_EA(ed)	SpDiam_L
SM02_EA(bo)	MDEC-12
SM03_EA(bo)	T(N..N)
SM04_EA(bo)	F09[C-O]
SM05_EA(bo)	C-028
SM06_EA(bo)	MATS2i
SM07_EA(bo)	D/Dtr09
SM08_EA(bo)	P_VSA_charge_12
SM09_EA(bo)	GATS1p
SM10_EA(bo)	F02[C-N]
SM11_EA(bo)	J_Dz(Z)
SM12_EA(bo)	nROR
SM13_EA(bo)	O-059
SM14_EA(bo)	J_Dz(m)
SM15_EA(bo)	P_VSA_charge_8
SM02_EA(dm)	SM09_EA(ed)
SM03_EA(dm)	ATSC1e
SM04_EA(dm)	SsssN
SM05_EA(dm)	NssCH2
SM06_EA(dm)	F10[C-O]
SM07_EA(dm)	Eig02_EA(dm)
SM08_EA(dm)	AVS_B(i)
SM09_EA(dm)	SPP
SM10_EA(dm)	SM13_EA(dm)
SM11_EA(dm)	SM15_EA(dm)
SM12_EA(dm)	J_Dz(i)
SM13_EA(dm)	JGI6
SM14_EA(dm)	O-058
SM15_EA(dm)	SM11_EA(dm)
SM02_EA(ri)	J_Dz(e)
SM03_EA(ri)	SM10_EA(ed)
SM04_EA(ri)	SM09_EA(dm)
SM05_EA(ri)	F03[N-O]
SM06_EA(ri)	nN(CO)2
SM07_EA(ri)	H-046
SM08_EA(ri)	B03[N-O]
SM09_EA(ri)	Mp
SM10_EA(ri)	SpDiam_X
SM11_EA(ri)	MDEN-33
SM12_EA(ri)	P_VSA_MR_7
SM13_EA(ri)	AVS_B(e)
SM14_EA(ri)	SpPosA_B(e)
SM15_EA(ri)	MDEO-11
SM02_AEA(ed)	Eta_betaS_A
SM03_AEA(ed)	MATS8e
SM04_AEA(ed)	Chi_Dz(Z)
SM05_AEA(ed)	Chi_Dz(m)
SM06_AEA(ed)	NdO
SM07_AEA(ed)	D/Dtr10
SM08_AEA(ed)	CATS2D_08_DL
SM09_AEA(ed)	nCsp3
SM10_AEA(ed)	SpMAD_EA(bo)
SM11_AEA(ed)	SM11_EA(ed)
SM12_AEA(ed)	CIC4
SM13_AEA(ed)	Chi_Dz(e)
SM14_AEA(ed)	Q2
SM15_AEA(ed)	ChiA_X
SM02_AEA(bo)	Chi_Dz(i)
SM03_AEA(bo)	nN
SM04_AEA(bo)	SM02_EA(dm)
SM05_AEA(bo)	SpMax_L
SM06_AEA(bo)	CATS2D_06_DL
SM07_AEA(bo)	Hy
SM08_AEA(bo)	SM07_EA(dm)
SM09_AEA(bo)	s34_phRelSize
SM10_AEA(bo)	SM12_EA(ed)
SM11_AEA(bo)	nR10
SM12_AEA(bo)	CATS2D_04_AA
SM13_AEA(bo)	JGI7
SM14_AEA(bo)	JGI1
SM15_AEA(bo)	C-002
SM02_AEA(dm)	nR09
SM03_AEA(dm)	IC2
SM04_AEA(dm)	BIC3
SM05_AEA(dm)	CATS2D_04_DL
SM06_AEA(dm)	SIC3
SM07_AEA(dm)	SM13_EA(ed)
SM08_AEA(dm)	nRNR2
SM09_AEA(dm)	Eta_sh_p
SM10_AEA(dm)	s2_numRotBonds
SM11_AEA(dm)	SM05_EA(dm)
SM12_AEA(dm)	nRCONHR
SM13_AEA(dm)	mindO
SM14_AEA(dm)	SM14_EA(ed)
SM15_AEA(dm)	RNCG
SM02_AEA(ri)	nO
SM03_AEA(ri)	P_VSA_charge_14
SM04_AEA(ri)	JGI2
SM05_AEA(ri)	GATS2p
SM06_AEA(ri)	JGI5
SM07_AEA(ri)	ATSC8e
SM08_AEA(ri)	NNRS
SM09_AEA(ri)	T(O..O)
SM10_AEA(ri)	Eta_D_beta_A
SM11_AEA(ri)	SM15_EA(ed)
SM12_AEA(ri)	C-040
SM13_AEA(ri)	SsssCH
SM14_AEA(ri)	VE1sign_Dz(p)
SM15_AEA(ri)	F04[N-O]
Eig01_EA	SpDiam_EA(ri)
Eig02_EA	NdssC
Eig03_EA	P_VSA_ppp_hal
Eig04_EA	s4_phRelSize_2
Eig05_EA	VE1sign_Dz(v)
Eig06_EA	nDB
Eig07_EA	MaxsCH3
Eig08_EA	nArOR
Eig09_EA	SpMAD_B(p)
Eig10_EA	SpMAD_B(v)
Eig11_EA	GATS7v
Eig12_EA	s2_numAroBonds
Eig13_EA	Eig04_AEA(dm)
Eig14_EA	B09[O-O]
Eig15_EA	SpDiam_AEA(ed)
Eig01_EA(ed)	IVDE
Eig02_EA(ed)	F09[O-O]
Eig03_EA(ed)	RCI
Eig04_EA(ed)	B04[N-O]
Eig05_EA(ed)	Chi_Dz(v)
Eig06_EA(ed)	SpMAD_B(e)
Eig07_EA(ed)	N-068
Eig08_EA(ed)	nX
Eig09_EA(ed)	P_VSA_e_5
Eig10_EA(ed)	N%
Eig11_EA(ed)	SM1_Dz(Z)
Eig12_EA(ed)	B02[N-O]
Eig13_EA(ed)	SM1_Dz(m)
Eig14_EA(ed)	Eig01_EA(ri)
Eig15_EA(ed)	SpMax_EA(ri)
Eig01_EA(bo)	RFD
Eig02_EA(bo)	minssO
Eig03_EA(bo)	SpDiam_EA(ed)
Eig04_EA(bo)	nLevel9
Eig05_EA(bo)	Eig01_AEA(dm)
Eig06_EA(bo)	SpMax_AEA(dm)
Eig07_EA(bo)	SpMAD_B(i)
Eig08_EA(bo)	CIC5
Eig09_EA(bo)	SM03_EA(dm)
Eig10_EA(bo)	MCD
Eig11_EA(bo)	GATS8e
Eig12_EA(bo)	P_VSA_MR_3
Eig13_EA(bo)	Eig01_AEA(ri)
Eig14_EA(bo)	SpMax_AEA(ri)
Eig15_EA(bo)	J_Dz(v)
Eig01_EA(dm)	H-051
Eig02_EA(dm)	SdssC
Eig03_EA(dm)	Eta_betaP_A
Eig04_EA(dm)	C-033
Eig05_EA(dm)	Eta_B_A
Eig06_EA(dm)	C-026
Eig07_EA(dm)	nCs
Eig08_EA(dm)	MATS2p
Eig09_EA(dm)	Eig08_EA(dm)
Eig10_EA(dm)	s3_phRelSize
Eig11_EA(dm)	s3_relPathLength
Eig12_EA(dm)	SpDiam_EA
Eig13_EA(dm)	SM09_AEA(bo)
Eig14_EA(dm)	Eig01_EA
Eig15_EA(dm)	SpMax_EA
Eig01_EA(ri)	CATS2D_03_DA
Eig02_EA(ri)	C-003
Eig03_EA(ri)	SaaN
Eig04_EA(ri)	MATS3v
Eig05_EA(ri)	B10[C-O]
Eig06_EA(ri)	F09[N-N]
Eig07_EA(ri)	SM10_AEA(dm)
Eig08_EA(ri)	SpMax_EA(ed)
Eig09_EA(ri)	Eig01_EA(ed)
Eig10_EA(ri)	P_VSA_charge_1
Eig11_EA(ri)	C-006
Eig12_EA(ri)	Chi_Dz(p)
Eig13_EA(ri)	Eta_D_epsiB
Eig14_EA(ri)	Eig01_AEA(ed)
Eig15_EA(ri)	SpMax_AEA(ed)
Eig01_AEA(ed)	GATS7e
Eig02_AEA(ed)	SpDiam_AEA(ri)
Eig03_AEA(ed)	MATS1i
Eig04_AEA(ed)	F06[N-N]
Eig05_AEA(ed)	s3_phRelSize_2
Eig06_AEA(ed)
Eig07_AEA(ed)
Eig08_AEA(ed)
Eig09_AEA(ed)
Eig10_AEA(ed)
Eig11_AEA(ed)
Eig12_AEA(ed)
Eig13_AEA(ed)
Eig14_AEA(ed)
Eig15_AEA(ed)
Eig01_AEA(bo)
Eig02_AEA(bo)
Eig03_AEA(bo)
Eig04_AEA(bo)
Eig05_AEA(bo)
Eig06_AEA(bo)
Eig07_AEA(bo)
Eig08_AEA(bo)
Eig09_AEA(bo)
Eig10_AEA(bo)
Eig11_AEA(bo)
Eig12_AEA(bo)
Eig13_AEA(bo)
Eig14_AEA(bo)
Eig15_AEA(bo)
Eig01_AEA(dm)
Eig02_AEA(dm)
Eig03_AEA(dm)
Eig04_AEA(dm)
Eig05_AEA(dm)
Eig06_AEA(dm)
Eig07_AEA(dm)
Eig08_AEA(dm)
Eig09_AEA(dm)
Eig10_AEA(dm)
Eig11_AEA(dm)
Eig12_AEA(dm)
Eig13_AEA(dm)
Eig14_AEA(dm)
Eig15_AEA(dm)
Eig01_AEA(ri)
Eig02_AEA(ri)
Eig03_AEA(ri)
Eig04_AEA(ri)
Eig05_AEA(ri)
Eig06_AEA(ri)
Eig07_AEA(ri)
Eig08_AEA(ri)
Eig09_AEA(ri)
Eig10_AEA(ri)
Eig11_AEA(ri)
Eig12_AEA(ri)
Eig13_AEA(ri)
Eig14_AEA(ri)
Eig15_AEA(ri)
nCp
nCs
nCt
nCq
nCrs
nCrt
nCrq
nCar
nCbH
nCb-
nCconj
nR=Cp
nR=Cs
nR=Ct
n=C=
nR#CH/X
nR#C-
nROCN
nArOCN
nRNCO
nArNCO
nRSCN
nArSCN
nRNCS
nArNCS
nRCOOH
nArCOOH
nRCOOR
nArCOOR
nRCONH2
nArCONH2
nRCONHR
nArCONHR
nRCONR2
nArCONR2
nROCON
nArOCON
nRCOX
nArCOX
nRCSOH
nArCSOH
nRCSSH
nArCSSH
nRCOSR
nArCOSR
nRCSSR
nArCSSR
nRCHO
nArCHO
nRCO
nArCO
nCONN
nC=O(O)2
nN=C-N<
nC(=N)N2
nRC=N
nArC=N
nRCNO
nArCNO
nRNH2
nArNH2
nRNHR
nArNHR
nRNR2
nArNR2
nN-N
nN=N
nRCN
nArCN
nN+
nNq
nRNHO
nArNHO
nRNNOx
nArNNOx
nRNO
nArNO
nRNO2
nArNO2
nN(CO)2
nC=N-N<
nROH
nArOH
nOHp
nOHs
nOHt
nROR
nArOR
nROX
nArOX
nO(C=O)2
nH2O
nSH
nC=S
nRSR
nRSSR
nSO
nS(=O)2
nSOH
nSOOH
nSO2OH
nSO3OH
nSO2
nSO3
nSO4
nSO2N
nPO3
nPO4
nPR3
nP(=O)O2R
nP(=O)R3/nPR5
nCH2RX
nCHR2X
nCR3X
nR=CHX
nR=CRX
nR#CX
nCHRX2
nCR2X2
nR=CX2
nCRX3
nArX
nCXr
nCXr=
nCconjX
nAziridines
nOxiranes
nThiranes
nAzetidines
nOxetanes
nThioethanes
nBeta-Lactams
nPyrrolidines
nOxolanes
ntH-Thiophenes
nPyrroles
nPyrazoles
nImidazoles
nFuranes
nThiophenes
nOxazoles
nIsoxazoles
nThiazoles
nIsothiazoles
nTriazoles
nPyridines
nPyridazines
nPyrimidines
nPyrazines
n135-Triazines
n124-Triazines
nHDon
nHAcc
C-001
C-002
C-003
C-004
C-005
C-006
C-007
C-008
C-009
C-010
C-011
C-012
C-013
C-014
C-015
C-016
C-017
C-018
C-019
C-020
C-021
C-022
C-023
C-024
C-025
C-026
C-027
C-028
C-029
C-030
C-031
C-032
C-033
C-034
C-035
C-036
C-037
C-038
C-039
C-040
C-041
C-042
C-043
C-044
H-046
H-047
H-048
H-049
H-050
H-051
H-052
H-053
H-054
H-055
O-056
O-057
O-058
O-059
O-060
O-061
O-062
O-063
Se-064
Se-065
N-066
N-067
N-068
N-069
N-070
N-071
N-072
N-073
N-074
N-075
N-076
N-077
N-078
N-079
F-081
F-082
F-083
F-084
F-085
Cl-086
Cl-087
Cl-088
Cl-089
Cl-090
Br-091
Br-092
Br-093
Br-094
Br-095
I-096
I-097
I-098
I-099
I-100
F-101
Cl-102
Br-103
I-104
S-106
S-107
S-108
S-109
S-110
Si-111
B-112
P-115
P-116
P-117
P-118
P-119
P-120
SsCH3
SdCH2
SssCH2
StCH
SdsCH
SaaCH
SsssCH
SddC
StsC
SdssC
SaasC
SaaaC
SssssC
SsNH2
SssNH
SdNH
SsssN
SdsN
SaaN
StN
SsNH3+
SssNH2+
SdNH2+
SsssNH+
SssssN+
SddsN
SaadN
SaasN
SaaNH
SsOH
SdO
SssO
SaaO
SsPH2
SssPH
SsssP
SdsssP
SddsP
SsssssP
SsSH
SdS
SssS
SaaS
SdssS
SddssS
SssssssS
SsF
SsCl
SsBr
SsI
SsLi
SssBe
SssssBe-
SsBH2
SssBH
SsssB
SssssB-
SsGeH3
SssGeH2
SsssGeH
SssssGe
SsAsH2
SssAsH
SsssAs
SsssssAs
SdsssAs
SddsAs
SsSeH
SdSe
SssSe
SaaSe
SdssSe
SssssssSe
SddssSe
SsSnH3
SssSnH2
SsssSnH
SssssSn
SsPbH3
SssPbH2
SsssPbH
SssssPb
SsSiH3
SssSiH2
SsssSiH
SssssSi
NsCH3
NdCH2
NssCH2
NtCH
NdsCH
NaaCH
NsssCH
NddC
NtsC
NdssC
NaasC
NaaaC
NssssC
NsNH2
NssNH
NdNH
NsssN
NdsN
NaaN
NtN
NsNH3+
NssNH2+
NdNH2+
NsssNH+
NssssN+
NddsN
NaadN
NaasN
NaaNH
NsOH
NdO
NssO
NaaO
NsPH2
NssPH
NsssP
NdsssP
NddsP
NsssssP
NsSH
NdS
NssS
NaaS
NdssS
NddssS
NssssssS
NsF
NsCl
NsBr
NsI
NsLi
NssBe
NssssBe-
NsBH2
NssBH
NsssB
NssssB-
NsGeH3
NssGeH2
NsssGeH
NssssGe
NsAsH2
NssAsH
NsssAs
NsssssAs
NdsssAs
NddsAs
NsSeH
NdSe
NssSe
NaaSe
NdssSe
NssssssSe
NddssSe
NsSnH3
NssSnH2
NsssSnH
NssssSn
NsPbH3
NssPbH2
NsssPbH
NssssPb
NsSiH3
NssSiH2
NsssSiH
NssssSi
minsCH3
mindCH2
minssCH2
mintCH
mindsCH
minaaCH
minsssCH
minddC
mintsC
mindssC
minaasC
minaaaC
minssssC
minsNH2
minssNH
mindNH
minsssN
mindsN
minaaN
mintN
minsNH3+
minssNH2+
mindNH2+
minsssNH+
minssssN+
minddsN
minaadN
minaasN
minaaNH
minsOH
mindO
minssO
minaaO
minsPH2
minssPH
minsssP
mindsssP
minddsP
minsssssP
minsSH
mindS
minssS
minaaS
mindssS
minddssS
minssssssS
minsF
minsCl
minsBr
minsI
minsLi
minssBe
minssssBe-
minsBH2
minssBH
minsssB
minssssB-
minsGeH3
minssGeH2
minsssGeH
minssssGe
minsAsH2
minssAsH
minsssAs
minsssssAs
mindsssAs
minddsAs
minsSeH
mindSe
minssSe
minaaSe
mindssSe
minssssssSe
minddssSe
minsSnH3
minssSnH2
minsssSnH
minssssSn
minsPbH3
minssPbH2
minsssPbH
minssssPb
minsSiH3
minssSiH2
minsssSiH
minssssSi
[truncated: 1,967 more rows]

## Sheet: 8. TNF-α
Supplementary Data 4. The optimal combination of descriptors of each algorithm
Bioactivity dataset 1. Biological toxicology
Descriptprs-Original (n=3229)	Descriptprs-Wilcoxon (n=1261)	Descriptprs-Spearman (n=288)	Descriptprs-RFE (XGBoost,n=122)	Descriptprs-DT (n=288)	Descriptprs-LR (n=191)	Descriptprs-RF (n=79)
MW	MW	MW	MW	MW	CATS2D_02_AL	MW
AMW	SpAbs_Dz(p)	CATS2D_02_AL	CATS2D_02_AL	CATS2D_02_AL	CATS2D_06_AL	CATS2D_02_AL
Sp	HyWi_Dz(p)	CATS2D_06_AL	CATS2D_06_AL	CATS2D_06_AL	P_VSA_MR_5	CATS2D_06_AL
Si	H_Dz(p)	P_VSA_MR_5	P_VSA_MR_5	P_VSA_MR_5	SAscore	P_VSA_MR_5
Mp	AVS_Dz(p)	SAscore	SAscore	SAscore	P_VSA_LogP_5	SAscore
Mi	Wi_Dz(p)	P_VSA_LogP_5	P_VSA_LogP_5	P_VSA_LogP_5	CATS2D_07_AL	P_VSA_LogP_5
GD	SM6_Dz(m)	D/Dtr05	CATS2D_07_AL	D/Dtr05	Eta_betaS_A	D/Dtr05
nAT	SM5_Dz(m)	CATS2D_07_AL	Eta_betaS_A	CATS2D_07_AL	F04[N-N]	CATS2D_07_AL
nSK	SM4_Dz(m)	Eta_betaS_A	F04[N-N]	Eta_betaS_A	CATS2D_08_LL	Eta_betaS_A
nAA	SM3_Dz(m)	F04[N-N]	CATS2D_08_LL	F04[N-N]	D/Dtr09	F04[N-N]
nTA	SM2_Dz(m)	CATS2D_08_LL	D/Dtr09	CATS2D_08_LL	AVS_B(i)	CATS2D_08_LL
nBT	Ho_Dz(m)	D/Dtr09	AVS_B(i)	D/Dtr09	NaasC	D/Dtr09
nBO	SpMAD_Dz(m)	AVS_B(i)	JGI10	AVS_B(i)	CATS2D_03_AL	AVS_B(i)
nBM	SpAD_Dz(m)	NaasC	CATS2D_03_AL	NaasC	CATS2D_09_AL	JGI10
SCBO	SpDiam_Dz(m)	JGI10	CATS2D_09_AL	JGI10	SaaN	CATS2D_09_AL
RBN	Eta_epsi	CATS2D_03_AL	SaaN	CATS2D_03_AL	CATS2D_06_DL	SaaN
RBF	SpMax_Dz(m)	CATS2D_09_AL	CATS2D_06_DL	CATS2D_09_AL	P_VSA_charge_2	P_VSA_s_3
nDB	SpPosLog_Dz(m)	SaaN	P_VSA_s_3	SaaN	SssNH	P_VSA_charge_2
nTB	SpPosA_Dz(m)	CATS2D_06_DL	P_VSA_charge_2	CATS2D_06_DL	P_VSA_charge_7	SssNH
nAB	SpPos_Dz(m)	P_VSA_s_3	SssNH	P_VSA_s_3	P_VSA_charge_10	P_VSA_charge_7
nH	SpAbs_Dz(m)	P_VSA_charge_2	P_VSA_charge_7	P_VSA_charge_2	F08[N-O]	P_VSA_charge_10
nC	HyWi_Dz(m)	SssNH	P_VSA_charge_10	SssNH	GATS8i	P_VSA_MR_7
nN	J_Dz(m)	P_VSA_charge_7	P_VSA_MR_7	P_VSA_charge_7	P_VSA_MR_7	SpMin1_Bh(p)
nO	H_Dz(m)	P_VSA_charge_10	SpMin1_Bh(p)	P_VSA_charge_10	H-049	B10[C-C]
nP	AVS_Dz(m)	F08[N-O]	H-049	F08[N-O]	CATS2D_07_AA	JGI9
nS	WiA_Dz(m)	GATS8i	CATS2D_07_AA	GATS8i	P_VSA_MR_2	SaasC
nF	Wi_Dz(m)	P_VSA_MR_7	CATS2D_04_AA	P_VSA_MR_7	SaasC	nPyridines
nCL	SM6_Dz(Z)	SpMin1_Bh(p)	SaasC	SpMin1_Bh(p)	nPyridines	PW3
nBR	SM5_Dz(Z)	H-049	nPyridines	H-049	PW3	F08[N-N]
nI	SM4_Dz(Z)	CATS2D_07_AA	PW3	CATS2D_07_AA	C-040	JGI8
nB	SpPos_Dz(p)	CATS2D_04_AA	C-040	CATS2D_04_AA	PW2	BIC3
nHM	SM3_Dz(Z)	B10[C-C]	PW2	B10[C-C]	C-025	MaxtsC
nHet	SpPosLog_Dz(p)	P_VSA_MR_2	P_VSA_LogP_6	P_VSA_MR_2	P_VSA_LogP_2	ESOL
nX	SpDiam_Dz(p)	JGI9	CATS2D_04_DA	JGI9	P_VSA_LogP_6	s4_numAroBonds
H%	Chi_B(m)	SaasC	F04[N-O]	SaasC	CATS2D_04_DA	J_D/Dt
C%	WiA_B(m)	nPyridines	P_VSA_charge_4	nPyridines	F04[N-O]	F10[N-N]
N%	Wi_B(m)	PW3	N-072	PW3	P_VSA_charge_4	P_VSA_charge_3
O%	SM6_Dz(i)	C-040	F08[N-N]	C-040	F08[N-N]	AVS_B(p)
X%	SM5_Dz(i)	PW2	JGI8	PW2	JGI8	C-011
nCsp3	SM4_Dz(i)	CATS2D_08_DA	MaxtsC	CATS2D_08_DA	BIC3	JGI7
nCsp2	SM3_Dz(i)	C-025	ESOL	C-025	MaxtsC	PW5
nCsp	SM2_Dz(i)	P_VSA_LogP_2	s4_numAroBonds	P_VSA_LogP_2	ESOL	QED
Fsp3	SM1_Dz(i)	B03[N-N]	J_D/Dt	B03[N-N]	s4_numAroBonds	MATS4i
max_conj_path	Ho_Dz(i)	P_VSA_LogP_6	P_VSA_charge_13	P_VSA_LogP_6	J_D/Dt	SdO
nStructures	SpAD_Dz(i)	CATS2D_04_DA	P_VSA_charge_3	CATS2D_04_DA	GATS6i	P_VSA_charge_1
totalcharge	SpDiam_Dz(i)	F04[N-O]	AVS_B(p)	F04[N-O]	F10[N-N]	mindssC
nCIC	SpMax_Dz(i)	P_VSA_charge_4	N-073	P_VSA_charge_4	P_VSA_charge_3	Eta_sh_y
nCIR	SpPosLog_Dz(i)	N-072	minaaaC	N-072	AVS_B(p)	JGI6
TRS	SpPos_Dz(i)	F08[N-N]	C-011	F08[N-N]	N-073	SpMin1_Bh(i)
Rperim	SpAbs_Dz(i)	GATS8p	CATS2D_06_DA	GATS8p	P_VSA_LogP_3	MAXDN
Rbrid	HyWi_Dz(i)	F07[N-N]	PW5	F07[N-N]	CATS2D_05_AL	nCconj
MCD	J_Dz(i)	JGI8	QED	JGI8	F06[N-N]	GATS8m
RFD	H_Dz(i)	BIC3	CATS2D_05_DA	BIC3	minaaaC	GATS7m
RCI	AVS_Dz(i)	F05[N-N]	SdO	F05[N-N]	CATS2D_05_AA	MATS1m
NRS	WiA_Dz(i)	MaxtsC	P_VSA_charge_1	MaxtsC	CATS2D_06_DA	AVS_B(m)
NNRS	Wi_Dz(i)	ESOL	mindssC	ESOL	JGI7	Chi_D/Dt
nSpiro	SM6_Dz(p)	C-034	NdssC	C-034	PW5	IC0
nBridgeHead	SM5_Dz(p)	s4_numAroBonds	N-074	s4_numAroBonds	CATS2D_09_AA	SpPosA_X
nR03	SM4_Dz(p)	J_D/Dt	Eta_sh_y	J_D/Dt	CATS2D_07_DA	C%
nR04	SM3_Dz(p)	GATS6i	nPyrroles	GATS6i	MATS4i	Eta_alpha_A
nR05	SM2_Dz(p)	F07[N-O]	F10[C-F]	F07[N-O]	H-052	MaxdssC
nR06	Ho_Dz(p)	F10[N-N]	CATS2D_03_AA	F10[N-N]	SdO	MATS8i
nR07	SpAD_Dz(p)	P_VSA_charge_13	CATS2D_05_DL	P_VSA_charge_13	CATS2D_09_DL	JGI4
nR08	SpMax_Dz(p)	P_VSA_charge_3	JGI6	P_VSA_charge_3	CATS2D_04_LL	H%
nR09	HyWi_B(m)	AVS_B(p)	MDEN-13	AVS_B(p)	F10[N-O]	O%
nR10	SM2_Dz(Z)	N-073	MAXDN	N-073	P_VSA_charge_1	GATS3i
nR11	SpMAD_Dz(Z)	P_VSA_LogP_3	minssCH2	P_VSA_LogP_3	CATS2D_04_AL	GATS4m
nR12	Ho_Dt	CATS2D_05_AL	nCconj	CATS2D_05_AL	mindssC	MATS1i
nBnz	SpMAD_Dt	F06[N-N]	nCrs	F06[N-N]	NdssC	GATS1m
ARR	SpAD_Dt	minaaaC	GATS7m	minaaaC	F01[N-N]	minaaCH
AP	SpDiam_Dt	C-011	AVS_B(m)	C-011	nPyrroles	RBF
D/Dtr03	SpMaxA_Dt	nCt	CATS2D_01_AA	nCt	CATS2D_09_DA	MATS3m
D/Dtr04	SpMax_Dt	GATS7i	Chi_D/Dt	GATS7i	F10[C-F]	Mi
D/Dtr05	SpPosLog_Dt	CATS2D_05_AA	minsOH	CATS2D_05_AA	SpPosA_B(i)	MaxaasN
D/Dtr06	SpPosA_Dt	CATS2D_06_DA	IC0	CATS2D_06_DA	CATS2D_03_AA	GATS6m
D/Dtr07	SpPos_Dt	JGI7	SpPosA_X	JGI7	minsssCH	D/Dtr10
D/Dtr08	Chi_Dt	PW5	C-026	PW5	CATS2D_05_DL	GATS3m
D/Dtr09	H_Dt	CATS2D_09_AA	MDEN-33	CATS2D_09_AA	C-008	SpPosA_B(m)
D/Dtr10	AVS_Dt	QED	F03[N-O]	QED	JGI6	GATS2m
D/Dtr11	WiA_Dt	CATS2D_07_DA	Eta_alpha_A	CATS2D_07_DA	CATS2D_06_AA
D/Dtr12	Wi_Dt	MATS4i	MaxdssC	MATS4i	IVDE
Pol	SM6_H2	CATS2D_05_DA	MATS5p	CATS2D_05_DA	SpMin1_Bh(i)
LPRS	SM5_H2	H-052	JGI4	H-052	MAXDN
MSD	SM4_H2	SdO	H%	SdO	C-006
SPI	SM3_H2	CATS2D_09_DL	O%	CATS2D_09_DL	minssCH2
ECC	SM2_H2	CATS2D_04_LL	P_VSA_charge_12	CATS2D_04_LL	GATS6p
AECC	EE_H2	F10[N-O]	s3_numAroBonds	F10[N-O]	F09[N-N]
DECC	Ho_H2	P_VSA_charge_1	B07[O-O]	P_VSA_charge_1	SpMin1_Bh(m)
MDDD	SpAD_H2	CATS2D_04_AL	minssO	CATS2D_04_AL	nOHt
UNIP	SpDiam_H2	mindssC	CATS2D_02_AA	mindssC	nCrs
CENT	SpMaxA_H2	NdssC	GATS4m	NdssC	nArNHR
VAR	SpMax_H2	B09[N-O]	O-057	B09[N-O]	P_VSA_LogP_1
ICR	SpPosLog_H2	F01[N-N]	JGI5	F01[N-N]	GATS7m
MaxTD	SpPos_H2	N-074	s3_numRotBonds	N-074	CATS2D_08_DD
MeanTD	Chi_H2	Eta_sh_y	s2_phRelSize_2	Eta_sh_y	MATS1m
MaxDD	AVS_H2	CATS2D_04_DL	H-053	CATS2D_04_DL	AVS_B(m)
MeanDD	SM2_Dt	nPyrroles	MATS1i	nPyrroles	GATS7p
Wap	Ho_Dz(Z)	CATS2D_09_DA	P_VSA_charge_11	CATS2D_09_DA	Eta_sh_x
S1K	SM3_Dt	F10[C-F]	P_VSA_LogP_8	F10[C-F]	MaxaaCH
S2K	SM5_Dt	SpPosA_B(i)	F09[C-S]	SpPosA_B(i)	MATS4m
S3K	SpAD_Dz(Z)	CATS2D_03_AA	minaaCH	CATS2D_03_AA	CATS2D_01_AA
PHI	SpDiam_Dz(Z)	CATS2D_02_DA	F07[C-S]	CATS2D_02_DA	Chi_D/Dt
PW2	SpMaxA_Dz(Z)	minsssCH	RBF	minsssCH	nCrt
PW3	SpMax_Dz(Z)	CATS2D_05_DL	P_VSA_charge_5	CATS2D_05_DL	minsOH
PW4	SpPosLog_Dz(Z)	nArCONHR	nPyrimidines	nArCONHR	IC0
PW5	SpPosA_Dz(Z)	C-008	Mi	C-008	F05[N-O]
MAXDN	SpPos_Dz(Z)	JGI6	NNRS	JGI6	CATS2D_03_DA
MAXDP	SpAbs_Dz(Z)	CATS2D_06_AA	SHED_AN	CATS2D_06_AA	N-070
DELS	HyWi_Dz(Z)	MDEN-13	MaxaasN	MDEN-13	CATS2D_03_DL
BAC	J_Dz(Z)	IVDE	MATS3i	IVDE	C-026
LOC	H_Dz(Z)	SpMin1_Bh(i)	B05[N-F]	SpMin1_Bh(i)	F02[N-N]
MWC01	AVS_Dz(Z)	MAXDN	D/Dtr10	MAXDN	MDEN-33
MWC02	WiA_Dz(Z)	CATS2D_04_DD	GATS3m	CATS2D_04_DD	SsssN
MWC03	Wi_Dz(Z)	C-006	SpPosA_B(m)	C-006	F03[N-O]
MWC04	SM6_D/Dt	minssCH2	nCb-	minssCH2	P_VSA_MR_3
MWC05	SM5_D/Dt	GATS6p	B10[O-S]	GATS6p	MATS8i
MWC06	SM4_D/Dt	F09[N-N]	GATS2m	F09[N-N]	MATS5p
MWC07	SM3_D/Dt	nCconj	P_VSA_MR_8	nCconj	JGI4
MWC08	SM2_D/Dt	SpMin1_Bh(m)	s4_numSharedNeighbors	SpMin1_Bh(m)	MATS6m
MWC09	EE_D/Dt	nOHt	CATS2D_07_DD	nOHt	ringChiralCenter
MWC10	Ho_D/Dt	nCrs	nImidazoles	nCrs	C-005
SRW02	SpAD_D/Dt	GATS8m		GATS8m	nX
SRW03	SpDiam_D/Dt	nArNHR		nArNHR	B04[C-C]
SRW04	SpMax_D/Dt	B06[O-O]		B06[O-O]	H%
SRW05	SpPosLog_D/Dt	P_VSA_LogP_1		P_VSA_LogP_1	O%
SRW06	SpPos_D/Dt	GATS7m		GATS7m	P_VSA_charge_12
SRW07	H_D/Dt	CATS2D_08_DD		CATS2D_08_DD	MATS2m
SRW08	Wi_D/Dt	MATS1m		MATS1m	s3_numAroBonds
SRW09	SM6_Dt	AVS_B(m)		AVS_B(m)	Eta_epsi_4
SRW10	SM4_Dt	GATS7p		GATS7p	O-057
MPC01	SpAbs_B(m)	Eta_sh_x		Eta_sh_x	JGI5
MPC02	SpPos_B(m)	B03[N-F]		B03[N-F]	GATS5m
MPC03	SpPosLog_B(m)	MaxaaCH		MaxaaCH	CATS2D_09_DD
MPC04	SpMax1_Bh(i)	B06[N-O]		B06[N-O]	C-041
MPC05	SpMax8_Bh(p)	MATS4m		MATS4m	s3_numRotBonds
MPC06	SpMax7_Bh(p)	CATS2D_01_AA		CATS2D_01_AA	F02[O-O]
MPC07	SpMax6_Bh(p)	Chi_D/Dt		Chi_D/Dt	H-053
MPC08	SpMax5_Bh(p)	nCrt		nCrt	MATS1i
MPC09	SpMax4_Bh(p)	minsOH		minsOH	P_VSA_LogP_8
MPC10	SpMax8_Bh(m)	IC0		IC0	GATS5i
piPC01	SpMax7_Bh(m)	F05[N-O]		F05[N-O]	Eta_D_AlphaA
piPC02	SpMax6_Bh(m)	SpPosA_X		SpPosA_X	s1_phSize
piPC03	SpMax5_Bh(m)	CATS2D_03_DA		CATS2D_03_DA	nArOR
piPC04	SpMax4_Bh(m)	N-070		N-070	C-043
piPC05	GGI10	C%		C%	MDEC-44
piPC06	GGI9	CATS2D_03_DL		CATS2D_03_DL	O-060
piPC07	GGI8	B01[C-O]		B01[C-O]	D/Dtr04
piPC08	GGI7	C-026		C-026	minaaCH
piPC09	GGI6	F02[N-N]		F02[N-N]	nArCONR2
piPC10	GGI5	MDEN-33		MDEN-33	nCL
TWC	GGI2	SsssN		SsssN	MATS5i
TPC	GGI1	F03[N-O]		F03[N-O]	nCONN
piID	CATS2D_02_AL	Eta_alpha_A		Eta_alpha_A	CATS2D_02_DD
PCR	CATS2D_08_AL	MaxdssC		MaxdssC	P_VSA_charge_5
PCD	SHED_AA	B09[O-O]		B09[O-O]	nPyrimidines
CID	SHED_AL	P_VSA_MR_3		P_VSA_MR_3	MATS3m
BID	SHED_LL	MATS8i		MATS8i	P_VSA_charge_6
ISIZ	T(N..N)	MATS5p		MATS5p	Mi
IAC	T(N..O)	JGI4		JGI4	B03[C-C]
AAC	ATSC8i	MATS6m		MATS6m	H-046
IDE	ATSC7i	MATS7m		MATS7m	MaxsssCH
IDM	ATSC6i	ringChiralCenter		ringChiralCenter	CATS2D_00_DP
IDDE	SpMax2_Bh(i)	MATS5m		MATS5m	nArNR2
IDDM	ATSC5i	C-005		C-005	MATS3i
IDET	SpMax3_Bh(i)	nX		nX	T(F..F)
IVDE	SpMax5_Bh(i)	B04[C-C]		B04[C-C]	GATS6m
IVDM	Eta_alpha	H%		H%	F03[O-O]
HVcpx	Eta_betaP	O%		O%	T(Cl..Cl)
IC0	Eta_beta	P_VSA_charge_12		P_VSA_charge_12	nRCONHR
IC1	Eta_C	MATS2m		MATS2m	B05[N-F]
IC2	Eta_L	MATS2p		MATS2p	GATS3m
IC3	Eta_R	s3_numAroBonds		s3_numAroBonds	C-033
IC4	Eta_F	B07[O-O]		B07[O-O]	N-069
IC5	P_VSA_ppp_cyc	minssO		minssO	SpPosA_B(m)
TIC0	Eta_LR	B10[O-O]		B10[O-O]	O-061
TIC1	Eta_FL	CATS2D_02_AA		CATS2D_02_AA	H-051
TIC2	Eta_B	GATS3i		GATS3i	nCb-
TIC3	P_VSA_m_2	Eta_epsi_4		Eta_epsi_4	F06[N-F]
TIC4	SpMin8_Bh(i)	GATS4m		GATS4m	B02[C-C]
TIC5	SpMin7_Bh(i)	O-057		O-057	nRCONR2
SIC0	SpMin6_Bh(i)	JGI5		JGI5	nPyrazoles
SIC1	SpMin5_Bh(i)	GATS5m		GATS5m	Cl-090
SIC2	SpMin4_Bh(i)	CATS2D_09_DD		CATS2D_09_DD	s4_numSharedNeighbors
SIC3	SpMin8_Bh(p)	C-041		C-041	CATS2D_04_NL
SIC4	SpMin7_Bh(p)	s3_numRotBonds		s3_numRotBonds	T(S..S)
SIC5	SpMin6_Bh(p)	s2_phRelSize_2		s2_phRelSize_2	CATS2D_07_DD
CIC0	SpMin5_Bh(p)	F02[O-O]		F02[O-O]	N-068
CIC1	SpMin4_Bh(p)	H-053		H-053	N-067
CIC2	SpMin3_Bh(p)	MATS8m		MATS8m	nImidazoles
CIC3	SpMin8_Bh(m)	MATS1i		MATS1i	nROCON
CIC4	SpMin7_Bh(m)	GATS1m		GATS1m	H-048
CIC5	SpMin4_Bh(m)	P_VSA_charge_11		P_VSA_charge_11
BIC2	SpMax8_Bh(i)	P_VSA_LogP_8		P_VSA_LogP_8
BIC3	SpMax7_Bh(i)	GATS5i		GATS5i
BIC4	SpMax6_Bh(i)	Eta_D_AlphaA		Eta_D_AlphaA
BIC5	SpMax4_Bh(i)	s1_phSize		s1_phSize
J_A	ATSC4i	nArOR		nArOR
SpPos_A	ATSC3i	C-043		C-043
SpPosA_A	ATSC2i	MDEC-44		MDEC-44
SpPosLog_A	SpPos_B(i)	F09[C-S]		F09[C-S]
SpMax_A	SpAbs_B(i)	O-060		O-060
SpMaxA_A	HyWi_B(i)	D/Dtr04		D/Dtr04
SpDiam_A	Chi_B(i)	minaaCH		minaaCH
SpAD_A	WiA_B(i)	nArCONR2		nArCONR2
SpMAD_A	Wi_B(i)	nHM		nHM
Ho_A	SM6_B(p)	nCL		nCL
EE_A	SM5_B(p)	MATS5i		MATS5i
Wi_D	SM4_B(p)	B05[O-O]		B05[O-O]
WiA_D	SM3_B(p)	F07[C-S]		F07[C-S]
AVS_D	SM2_B(p)	RBF		RBF
H_D	SM1_B(p)	nCONN		nCONN
Chi_D	EE_B(p)	LOC		LOC
J_D	Ho_B(p)	nN(CO)2		nN(CO)2
SpPos_D	SpAD_B(p)	CATS2D_02_DD		CATS2D_02_DD
SpPosA_D	SpMaxA_B(p)	P_VSA_charge_5		P_VSA_charge_5
SpPosLog_D	SpPosLog_B(p)	nPyrimidines		nPyrimidines
SpMax_D	SpPos_B(p)	MATS3m		MATS3m
SpMaxA_D	SpAbs_B(p)	P_VSA_charge_6		P_VSA_charge_6
SpDiam_D	HyWi_B(p)	Mi		Mi
SpAD_D	Chi_B(p)	NNRS		NNRS
SpMAD_D	WiA_B(p)	B03[C-C]		B03[C-C]
Ho_D	Wi_B(p)	SHED_AN		SHED_AN
SM2_D	SM3_B(m)	CATS2D_05_DD		CATS2D_05_DD
SM3_D	SM2_B(m)	MaxaasN		MaxaasN
SM4_D	SM1_B(m)	H-046		H-046
SM5_D	Ho_B(m)	MaxsssCH		MaxsssCH
SM6_D	SpAD_B(m)	CATS2D_00_DP		CATS2D_00_DP
Acon	SpMaxA_B(m)	nArNR2		nArNR2
QW_L	SpPosLog_B(i)	nArOH		nArOH
TI2_L	SpMaxA_B(i)	MATS3i		MATS3i
STN_L	SpAD_B(i)	nBridgeHead		nBridgeHead
SpPos_L	Ho_B(i)	B04[O-O]		B04[O-O]
SpPosA_L	ATSC1i	T(F..F)		T(F..F)
SpPosLog_L	ATSC8p	GATS6m		GATS6m
SpMax_L	ATS8i	MaxsCH3		MaxsCH3
SpMaxA_L	ATS7i	F03[O-O]		F03[O-O]
SpDiam_L	ATS3i	GATS2i		GATS2i
SpAD_L	ATS2i	T(Cl..Cl)		T(Cl..Cl)
SpMAD_L	ATS1i	B08[O-O]		B08[O-O]
Ho_L	ATS8p	arLevel1		arLevel1
EE_L	ATS7p	nRCONHR		nRCONHR
SM2_L	ATS6p	B04[N-F]		B04[N-F]
SM3_L	ATS5p	B05[N-F]		B05[N-F]
SM4_L	ATS4p	F-084		F-084
SM5_L	ATS3p	D/Dtr10		D/Dtr10
SM6_L	ATS2p	GATS3m		GATS3m
AVS_X	WiA_H2	C-003		C-003
H_X	ATS1p	GATS2p		GATS2p
Chi_X	ATS7m	C-033		C-033
J_X	ATS6m	B08[N-F]		B08[N-F]
SpPos_X	ATS5m	N-069		N-069
SpPosA_X	ATS4m	SpPosA_B(m)		SpPosA_B(m)
SpPosLog_X	ATS3m	O-061		O-061
SpMax_X	ATS2m	B09[O-F]		B09[O-F]
SpMaxA_X	ATS1m	B08[O-F]		B08[O-F]
SpDiam_X	SM6_B(i)	H-051		H-051
SpAD_X	SM5_B(i)	nCb-		nCb-
SpMAD_X	SM4_B(i)	F06[N-F]		F06[N-F]
Ho_X	SM3_B(i)	B10[O-S]		B10[O-S]
EE_X	SM2_B(i)	B09[N-F]		B09[N-F]
SM2_X	SM1_B(i)	GATS2m		GATS2m
SM3_X	EE_B(i)	P_VSA_charge_14		P_VSA_charge_14
SM4_X	ATS8m	B02[C-C]		B02[C-C]
SM5_X	Wi_H2	nAzetidines		nAzetidines
SM6_X	SpMaxA_Dz(m)	B10[O-F]		B10[O-F]
Wi_H2	Pol	F08[N-S]		F08[N-S]
WiA_H2	piPC01	C-032		C-032
AVS_H2	MPC10	nRCONR2		nRCONR2
Chi_H2	MPC09	P_VSA_MR_8		P_VSA_MR_8
J_H2	MPC08	B07[O-S]		B07[O-S]
SpPos_H2	MPC07	B05[N-S]		B05[N-S]
SpPosA_H2	MPC06	nPyrazoles		nPyrazoles
SpPosLog_H2	MPC05	Cl-090		Cl-090
SpMax_H2	MPC04	s4_numSharedNeighbors		s4_numSharedNeighbors
SpMaxA_H2	MPC03	B01[O-S]		B01[O-S]
SpDiam_H2	MPC02	CATS2D_04_NL		CATS2D_04_NL
SpAD_H2	MPC01	T(S..S)		T(S..S)
SpMAD_H2	SRW10	B08[O-S]		B08[O-S]
Ho_H2	SRW08	CATS2D_07_DD		CATS2D_07_DD
EE_H2	SRW06	F09[N-S]		F09[N-S]
SM2_H2	SRW04	N-068		N-068
SM3_H2	SRW02	minaaS		minaaS
SM4_H2	MWC10	N-067		N-067
SM5_H2	MWC09	nImidazoles		nImidazoles
SM6_H2	MWC08	CATS2D_01_DA		CATS2D_01_DA
Wi_Dt	MWC07	nROCON		nROCON
WiA_Dt	MWC06	H-048		H-048
AVS_Dt	MWC05	F06[N-S]		F06[N-S]
H_Dt	MWC04
Chi_Dt	piPC02
J_Dt	MWC03
SpPos_Dt	piPC03
SpPosA_Dt	piPC05
SpPosLog_Dt	IC1
SpMax_Dt	F04[C-C]
SpMaxA_Dt	HVcpx
SpDiam_Dt	IVDM
SpAD_Dt	F04[C-N]
SpMAD_Dt	IDET
Ho_Dt	IDDM
SM2_Dt	IDDE
SM3_Dt	IDM
SM4_Dt	IDE
SM5_Dt	IAC
SM6_Dt	ISIZ
Wi_D/Dt	BID
WiA_D/Dt	CID
AVS_D/Dt	PCD
H_D/Dt	piID
Chi_D/Dt	TPC
J_D/Dt	TWC
SpPos_D/Dt	piPC10
SpPosA_D/Dt	piPC09
SpPosLog_D/Dt	piPC08
SpMax_D/Dt	piPC07
SpMaxA_D/Dt	piPC06
SpDiam_D/Dt	piPC04
SpAD_D/Dt	IC2
SpMAD_D/Dt	MWC02
Ho_D/Dt	F05[C-C]
EE_D/Dt	F10[C-N]
SM2_D/Dt	NRS
SM3_D/Dt	Uc
SM4_D/Dt	Rperim
SM5_D/Dt	TRS
SM6_D/Dt	nCIR
Wi_Dz(Z)	nCIC
WiA_Dz(Z)	Ui
AVS_Dz(Z)	MR99
H_Dz(Z)	MRcons
Chi_Dz(Z)	Vx
J_Dz(Z)	VvdwMG
HyWi_Dz(Z)	nN
SpAbs_Dz(Z)	nC
SpPos_Dz(Z)	SCBO
SpPosA_Dz(Z)	nBM
SpPosLog_Dz(Z)	nBO
SpMax_Dz(Z)	nBT
SpMaxA_Dz(Z)	nSK
SpDiam_Dz(Z)	nAT
SpAD_Dz(Z)	GD
SpMAD_Dz(Z)	Si
Ho_Dz(Z)	Sp
SM1_Dz(Z)	F10[C-C]
SM2_Dz(Z)	MWC01
SM3_Dz(Z)	F09[C-N]
SM4_Dz(Z)	F08[C-N]
SM5_Dz(Z)	F05[C-N]
SM6_Dz(Z)	F06[C-C]
Wi_Dz(m)	S1K
WiA_Dz(m)	Wap
AVS_Dz(m)	MeanDD
H_Dz(m)	MaxDD
Chi_Dz(m)	MeanTD
J_Dz(m)	MaxTD
HyWi_Dz(m)	VAR
SpAbs_Dz(m)	CENT
SpPos_Dz(m)	UNIP
SpPosA_Dz(m)	MDDD
SpPosLog_Dz(m)	AECC
SpMax_Dz(m)	ECC
SpMaxA_Dz(m)	SPI
SpDiam_Dz(m)	MSD
SpAD_Dz(m)	LPRS
SpMAD_Dz(m)	SM6_X
Ho_Dz(m)	F06[C-N]
SM1_Dz(m)	F07[C-C]
SM2_Dz(m)	F07[C-N]
SM3_Dz(m)	D/Dtr06
SM4_Dz(m)	F08[C-C]
SM5_Dz(m)	F09[C-C]
SM6_Dz(m)	IC3
Wi_Dz(p)	Eta_betaS
WiA_Dz(p)	SM6_L
AVS_Dz(p)	H_D
H_Dz(p)	SpPosLog_L
HyWi_Dz(p)	SpMaxA_L
SpAbs_Dz(p)	SpAD_X
SpPos_Dz(p)	SpAD_L
SpPosA_Dz(p)	AVS_D
SpPosLog_Dz(p)	SpPos_L
SpMax_Dz(p)	WiA_D
SpMaxA_Dz(p)	EE_A
SpDiam_Dz(p)	Ho_A
SpAD_Dz(p)	Ho_L
SpMAD_Dz(p)	SpMaxA_A
Ho_Dz(p)	EE_L
SM1_Dz(p)	SpPosLog_A
SM2_Dz(p)	Wi_D
SM3_Dz(p)	STN_L
SM4_Dz(p)	QW_L
SM5_Dz(p)	Chi_D
SM6_Dz(p)	SM2_D
Wi_Dz(i)	Ho_D
WiA_Dz(i)	SM4_D
AVS_Dz(i)	SpMAD_D
H_Dz(i)	SpAD_D
Chi_Dz(i)	SpDiam_D
J_Dz(i)	Ho_X
HyWi_Dz(i)	SpMaxA_D
SpAbs_Dz(i)	SpMax_D
SpPos_Dz(i)	SM5_D
SpPosA_Dz(i)	SpPosLog_D
SpPosLog_Dz(i)	SpPosA_D
SpMax_Dz(i)	SpPos_D
SpMaxA_Dz(i)	J_D
SpDiam_Dz(i)	SM6_D
SpAD_Dz(i)	SpMaxA_X
SpMAD_Dz(i)	SpPos_A
Ho_Dz(i)	SpAD_A
SM1_Dz(i)	IC4
SM2_Dz(i)	F02[C-N]
SM3_Dz(i)	SM5_L
SM4_Dz(i)	SpPosLog_X
SM5_Dz(i)	F03[C-N]
SM6_Dz(i)	SpPos_X
Wi_B(m)	SM4_X
WiA_B(m)	TIC5
AVS_B(m)	SM4_L
Chi_B(m)	J_X
J_B(m)	TIC3
HyWi_B(m)	Chi_X
SpAbs_B(m)	H_X
SpPos_B(m)	TIC2
SpPosA_B(m)	TIC1
SpPosLog_B(m)	TIC0
SpMax_B(m)	IC5
SpMaxA_B(m)	TIC4
SpDiam_B(m)	F02[C-C]
SpAD_B(m)	SM3_D
SpMAD_B(m)	SM2_X
Ho_B(m)	EE_X
EE_B(m)	SM2_L
SM1_B(m)	SM3_L
SM2_B(m)	F01[C-N]
SM3_B(m)	F01[C-C]
SM4_B(m)	AVS_D/Dt
SM5_B(m)	SpMaxA_Dz(i)
SM6_B(m)	nHet
Wi_B(p)	SpPosA_Dz(i)
WiA_B(p)	SpMAD_Dz(i)
AVS_B(p)	ATS4i
Chi_B(p)	J_B(m)
J_B(p)	ICR
HyWi_B(p)	SpMin3_Bh(i)
SpAbs_B(p)	SpMin5_Bh(m)
SpPos_B(p)	J_B(i)
SpPosA_B(p)	nHAcc
SpPosLog_B(p)	GGI3
SpMax_B(p)	J_A
SpMaxA_B(p)	J_B(p)
SpDiam_B(p)	CATS2D_06_AL
SpAD_B(p)	SpMin6_Bh(m)
SpMAD_B(p)	ATSC7p
Ho_B(p)	F03[C-C]
EE_B(p)	SpMin2_Bh(p)
SM1_B(p)	P_VSA_e_2
SM2_B(p)	ATSC8m
SM3_B(p)	ATS6i
SM4_B(p)	SpMax2_Bh(p)
SM5_B(p)	Chi_Dz(m)
SM6_B(p)	Chi_Dz(Z)
Wi_B(i)	WiA_Dz(p)
WiA_B(i)	P_VSA_i_4
AVS_B(i)	P_VSA_i_2
Chi_B(i)	SpMax_B(i)
J_B(i)	P_VSA_MR_5
HyWi_B(i)	SpMax3_Bh(p)
SpAbs_B(i)	SAscore
SpPos_B(i)	EE_B(m)
SpPosA_B(i)	P_VSA_ppp_con
SpPosLog_B(i)	max_conj_path
SpMax_B(i)	SpMaxA_Dz(p)
SpMaxA_B(i)	SpPosA_Dz(p)
SpDiam_B(i)	P_VSA_LogP_5
SpAD_B(i)	J_H2
SpMAD_B(i)	ATS5i
Ho_B(i)	SpMAD_Dz(p)
EE_B(i)	ATSC7m
SM1_B(i)	SM4_B(m)
SM2_B(i)	ATSC6p
SM3_B(i)	MAXDP
SM4_B(i)	Eta_F_A
SM5_B(i)	P_VSA_e_3
SM6_B(i)	ATSC4p
ATS1m	GGI4
ATS2m	TPSA(Tot)
ATS3m	TPSA(NO)
ATS4m	CATS2D_00_AA
ATS5m	Chi_Dz(i)
ATS6m	SpMax3_Bh(m)
ATS7m	ATSC2p
ATS8m	D/Dtr05
ATS1p	ATSC5p
ATS2p	ATSC3p
ATS3p	P_VSA_LogP_4
ATS4p	S2K
ATS5p	nAB
ATS6p	CIC0
ATS7p	nAA
ATS8p	SAacc
ATS1i	P_VSA_v_2
ATS2i	SpMax_A
ATS3i	SpPosA_L
ATS4i	DELS
ATS5i	DECC
ATS6i	nCsp2
ATS7i	Eta_epsi_3
ATS8i	P_VSA_p_2
ATSC1m	ATSC1p
ATSC2m	P_VSA_ppp_ar
ATSC3m	SpMin3_Bh(m)
ATSC4m	SpDiam_B(i)
ATSC5m	Acon
ATSC6m	ATSC4m
ATSC7m	SM5_B(m)
ATSC8m	SpMax2_Bh(m)
ATSC1p	ATSC6m
ATSC2p	SHED_DA
ATSC3p	CATS2D_07_AL
ATSC4p	PCR
ATSC5p	P_VSA_ppp_A
ATSC6p	P_VSA_charge_9
ATSC7p	SpDiam_A
ATSC8p	Eta_betaS_A
ATSC1i	nH
ATSC2i	F04[N-N]
ATSC3i	SM1_Dz(p)
ATSC4i	ATSC5m
ATSC5i	CATS2D_08_LL
ATSC6i	ATSC3m
ATSC7i	J_Dt
ATSC8i	D/Dtr09
MATS1m	MDEN-23
MATS2m	AVS_B(i)
MATS3m	NaasC
MATS4m	MaxdO
MATS5m	SM6_B(m)
MATS6m	SHED_DL
MATS7m	F10[C-O]
MATS8m	JGI10
MATS1p	nCar
MATS2p	CATS2D_03_AL
MATS3p	CATS2D_09_AL
MATS4p	nR06
MATS5p	SpDiam_L
MATS6p	P_VSA_p_1
MATS7p	SaaN
MATS8p	SpMin2_Bh(i)
MATS1i	F09[C-O]
MATS2i	MaxaaN
MATS3i	SpDiam_B(p)
MATS4i	P_VSA_s_2
MATS5i	F08[C-O]
MATS6i	P_VSA_v_1
MATS7i	P_VSA_m_1
MATS8i	P_VSA_e_1
GATS1m	CATS2D_06_DL
GATS2m	P_VSA_s_3
GATS3m	nR05
GATS4m	N-075
GATS5m	P_VSA_charge_2
GATS6m	P_VSA_i_3
GATS7m	SssNH
GATS8m	NssNH
GATS1p	CATS2D_08_DL
GATS2p	SRW09
GATS3p	ATSC2m
GATS4p	B10[C-N]
GATS5p	F07[C-O]
GATS6p	NaaN
GATS7p	P_VSA_charge_7
GATS8p	P_VSA_s_5
GATS1i	SRW07
GATS2i	B09[C-N]
GATS3i	SRW05
GATS4i	Rbrid
GATS5i	minaaN
GATS6i	B08[C-N]
GATS7i	P_VSA_p_3
GATS8i	F06[C-O]
GGI1	P_VSA_v_3
GGI2	P_VSA_charge_10
GGI3	SM5_X
GGI4	PHI
GGI5	F08[N-O]
GGI6	CATS2D_09_LL
GGI7	GATS8i
GGI8	B04[N-N]
GGI9	CATS2D_07_DL
GGI10	P_VSA_MR_7
JGI1	SpMax_L
JGI2	SpMin1_Bh(p)
JGI3	mindO
JGI4	P_VSA_s_4
JGI5	SpMax1_Bh(p)
JGI6	N%
JGI7	B07[C-N]
JGI8	RBN
JGI9	P_VSA_s_6
JGI10	P_VSA_LogP_7
JGT	H-049
SpMax1_Bh(m)	CATS2D_07_AA
SpMax2_Bh(m)	CATS2D_04_AA
SpMax3_Bh(m)	MaxssNH
SpMax4_Bh(m)	B10[C-C]
SpMax5_Bh(m)	ATSC1m
SpMax6_Bh(m)	nR09
SpMax7_Bh(m)	P_VSA_MR_2
SpMax8_Bh(m)	JGI9
SpMax1_Bh(p)	SaasC
SpMax2_Bh(p)	TI2_L
SpMax3_Bh(p)	nPyridines
SpMax4_Bh(p)	SpMax_B(p)
SpMax5_Bh(p)	B08[N-O]
SpMax6_Bh(p)	CATS2D_08_AA
SpMax7_Bh(p)	PW3
SpMax8_Bh(p)	CATS2D_00_LL
SpMax1_Bh(i)	Eta_C_A
SpMax2_Bh(i)	B10[C-O]
SpMax3_Bh(i)	C-040
SpMax4_Bh(i)	PW2
SpMax5_Bh(i)	CATS2D_08_DA
SpMax6_Bh(i)	C-025
SpMax7_Bh(i)	C-027
SpMax8_Bh(i)	B06[C-N]
SpMin1_Bh(m)	P_VSA_LogP_2
SpMin2_Bh(m)	CATS2D_02_DL
SpMin3_Bh(m)	B03[N-N]
SpMin4_Bh(m)	C-028
SpMin5_Bh(m)	B09[C-O]
SpMin6_Bh(m)	P_VSA_LogP_6
SpMin7_Bh(m)	CATS2D_04_DA
SpMin8_Bh(m)	P_VSA_MR_6
SpMin1_Bh(p)	H-047
SpMin2_Bh(p)	F04[N-O]
SpMin3_Bh(p)	B09[C-C]
SpMin4_Bh(p)	NaaCH
SpMin5_Bh(p)	P_VSA_charge_4
SpMin6_Bh(p)	RCI
SpMin7_Bh(p)	N-072
SpMin8_Bh(p)	F08[N-N]
SpMin1_Bh(i)	GATS8p
SpMin2_Bh(i)	F07[N-N]
SpMin3_Bh(i)	CATS2D_00_DD
SpMin4_Bh(i)	JGI8
SpMin5_Bh(i)	BIC3
SpMin6_Bh(i)	P_VSA_MR_1
SpMin7_Bh(i)	F05[N-N]
SpMin8_Bh(i)	B08[C-O]
P_VSA_LogP_1	SM1_Dz(Z)
P_VSA_LogP_2	F03[N-N]
P_VSA_LogP_3	F02[N-O]
P_VSA_LogP_4	MaxtsC
P_VSA_LogP_5	mintsC
P_VSA_LogP_6	nCsp3
P_VSA_LogP_7	SM1_Dz(m)
P_VSA_LogP_8	B07[N-N]
P_VSA_MR_1	StsC
P_VSA_MR_2	SaaCH
P_VSA_MR_3	SpPosA_A
P_VSA_MR_4	SpMAD_A
P_VSA_MR_5	NtsC
P_VSA_MR_6	CATS2D_07_LL
P_VSA_MR_7	nTB
P_VSA_MR_8	SIC3
P_VSA_m_1	nTA
P_VSA_m_2	B08[N-N]
P_VSA_m_3	ESOL
P_VSA_m_4	C-034
P_VSA_m_5	CATS2D_06_LL
P_VSA_v_1	B05[C-N]
P_VSA_v_2	nCsp
P_VSA_v_3	SpMAD_H2
P_VSA_v_4	SpPosA_H2
P_VSA_e_1	s4_numAroBonds
P_VSA_e_2	J_D/Dt
P_VSA_e_3	GATS6i
P_VSA_e_4	SIC2
P_VSA_e_5	B07[C-O]
P_VSA_e_6	SpDiam_B(m)
P_VSA_p_1	F07[N-O]
P_VSA_p_2	B07[N-O]
P_VSA_p_3	SpMin2_Bh(m)
P_VSA_p_4	B08[C-C]
P_VSA_i_1	F10[N-N]
P_VSA_i_2	P_VSA_charge_13
P_VSA_i_3	P_VSA_charge_3
P_VSA_i_4	RFD
P_VSA_s_1	AVS_B(p)
P_VSA_s_2	B04[N-O]
P_VSA_s_3	N-073
P_VSA_s_4	S3K
P_VSA_s_5	P_VSA_LogP_3
P_VSA_s_6	CATS2D_05_AL
P_VSA_ppp_L	B10[N-N]
P_VSA_ppp_P	BIC2
P_VSA_ppp_N	F06[N-N]
P_VSA_ppp_D	s4_phSize
P_VSA_ppp_A	minaaaC
P_VSA_ppp_ar	B02[N-O]
P_VSA_ppp_con	B06[N-N]
P_VSA_ppp_hal	s34_phSize
P_VSA_ppp_cyc	s34_size
P_VSA_ppp_ter	C-011
P_VSA_charge_1	BIC4
P_VSA_charge_2	s4_size
P_VSA_charge_3	nCt
P_VSA_charge_4	nLevel8
P_VSA_charge_5	chiralMoment
P_VSA_charge_6	nLevel6
P_VSA_charge_7	GATS7i
P_VSA_charge_8	MaxaaaC
P_VSA_charge_9	CATS2D_05_AA
P_VSA_charge_10	CATS2D_06_DA
P_VSA_charge_11	nLevel9
P_VSA_charge_12	JGI7
P_VSA_charge_13	nLevel10
P_VSA_charge_14	PW5
Eta_alpha	s34_relSize
Eta_alpha_A	B05[N-N]
Eta_epsi	s4_pathLength
Eta_epsi_A	SHED_DD
Eta_betaS	chiralPhMoment
Eta_betaS_A	meanDistFromCC
Eta_betaP	maxDistfromCC
Eta_betaP_A	nHDon
Eta_beta	s4_phRelSize
Eta_beta_A	MDEC-24
Eta_C	CATS2D_09_AA
Eta_C_A	F05[C-O]
Eta_L	QED
Eta_L_A	BIC5
Eta_R	BAC
Eta_F	H-050
Eta_F_A	nLevel7
Eta_LR	CATS2D_07_DA
Eta_FL	T(O..O)
Eta_FL_A	MATS4i
Eta_B	CATS2D_05_DA
Eta_B_A	s4_numRotBonds
Eta_sh_p	MDEC-34
Eta_sh_y	s4_relSize
Eta_sh_x	P_VSA_m_3
Eta_D_AlphaA	H-052
Eta_D_AlphaB	SdO
Eta_epsi_2	SaaaC
Eta_epsi_3	MATS4p
Eta_epsi_4	SpMax1_Bh(m)
Eta_epsi_5	SIC4
Eta_D_epsiA	NaaaC
Eta_D_epsiB	s34_phRelSize
Eta_D_epsiC	P_VSA_charge_8
Eta_D_epsiD	CATS2D_09_DL
Eta_D_psiA	SssssC
Eta_D_beta	PW4
Eta_D_beta_A	CATS2D_04_LL
nCp	F10[N-O]
nCs	NssssC
nCt	s4_phRelSize_2
nCq	B07[C-C]
nCrs	minssssC
nCrt	SpDiam_X
nCrq	P_VSA_charge_1
nCar	CATS2D_04_AL
nCbH	mindssC
nCb-	MDEC-14
nCconj	NdssC
nR=Cp	B09[N-O]
nR=Cs	F09[N-O]
nR=Ct	F01[N-N]
n=C=	P_VSA_ppp_ter
nR#CH/X	CATS2D_05_LL
nR#C-	B01[N-N]
nROCN	P_VSA_ppp_D
nArOCN	SIC5
nRNCO	N-074
nArNCO	phLevel2
nRSCN	SpMAD_B(i)
nArSCN	nLevel5
nRNCS	Eta_sh_y
nArNCS	MaxssssC
nRCOOH	B10[N-O]
nArCOOH	CATS2D_04_DL
nRCOOR	nPyrroles
nArCOOR	Eta_sh_p
nRCONH2	SAdon
nArCONH2	CATS2D_09_DA
nRCONHR	F10[C-F]
nArCONHR	SpMAD_L
nRCONR2	SpPosA_B(i)
nArCONR2	CATS2D_03_AA
nROCON	SIC0
nArOCON	B10[C-F]
nRCOX	CATS2D_02_DA
nArCOX	O-058
nRCSOH	nLevel2
nArCSOH	minsssCH
nRCSSH	B06[C-O]
nArCSSH	CATS2D_05_DL
nRCOSR	QEDu
nArCOSR	B04[C-N]
nRCSSR	nLevel4
nArCSSR	SpMax_B(m)
nRCHO	nArCONHR
nArCHO	minssNH
nRCO	mintN
nArCO	MaxtN
nCONN	nLevel1
nC=O(O)2	nArCN
nN=C-N<	C-008
nC(=N)N2	MaxsF
nRC=N	StN
nArC=N	P_VSA_e_5
nRCNO	minsF
nArCNO	s3_size
nRNH2	NtN
nArNH2	s4_relPathLength
nRNHR	F02[C-O]
nArNHR	MATS6i
nRNR2	B03[C-N]
nArNR2	NssCH2
nN-N	JGI6
nN=N	s3_phSize
nRCN	F03[C-O]
nArCN	CATS2D_06_AA
nN+	B06[C-C]
nNq	MDEN-13
nRNHO	IVDE
nArNHO	SpMin1_Bh(i)
nRNNOx	s3_pathLength
nArNNOx	s3_phRelSize_2
nRNO	MAXDN
nArNO	CATS2D_04_DD
nRNO2	C-006
nArNO2	T(N..F)
nN(CO)2	B02[C-N]
nC=N-N<	minssCH2
nROH	F09[C-F]
nArOH	ChiralCenter
nOHp	GATS6p
nOHs	NsssCH
nOHt	B06[C-F]
nROR	F09[N-N]
nArOR	B09[C-F]
nROX	B07[C-F]
nArOX	C-024
nO(C=O)2	nCconj
nH2O	B08[C-F]
nSH	SpMAD_B(p)
nC=S	B01[C-N]
nRSR	F01[C-O]
nRSSR	nLevel3
nSO	SpMin1_Bh(m)
nS(=O)2	B09[N-N]
nSOH	B04[C-F]
nSOOH	B01[C-F]
nSO2OH	nOHt
nSO3OH	F06[C-F]
nSO2	nCrs
nSO3	T(O..F)
nSO4	F08[C-F]
nSO2N	SdssC
nPO3	B05[C-F]
nPO4	F07[C-F]
nPR3	SsF
nP(=O)O2R	GATS8m
nP(=O)R3/nPR5	nArNHR
nCH2RX	nPyridazines
nCHR2X	B06[O-O]
nCR3X	P_VSA_LogP_1
nR=CHX	s3_phRelSize
nR=CRX	B03[C-F]
nR#CX	NsCH3
nCHRX2	s2_size
nCR2X2	SsssCH
nR=CX2	s3_relSize
nCRX3	s3_relPathLength_2
nArX	Hy
nCXr	B02[C-F]
nCXr=	F01[C-F]
nCconjX	P_VSA_e_6
nAziridines	NsF
nOxiranes	nF
nThiranes	s3_relPathLength
nAzetidines	GATS7m
nOxetanes	nO
nThioethanes	F04[C-F]
nBeta-Lactams	GATS4p
nPyrrolidines	NdO
nOxolanes	CATS2D_08_DD
ntH-Thiophenes	MATS1m
nPyrroles	nCs
nPyrazoles	B07[N-F]
nImidazoles	F05[C-F]
nFuranes	AVS_B(m)
nThiophenes	F02[C-F]
nOxazoles	F07[N-F]
nIsoxazoles	GATS7p
nThiazoles	F03[C-F]
nIsothiazoles	Eta_sh_x
nTriazoles	B03[N-F]
nPyridines	F03[N-F]
nPyridazines	P_VSA_ppp_L
nPyrimidines	s4_relPathLength_2
nPyrazines	F-081
n135-Triazines	B03[O-F]
n124-Triazines	F03[O-F]
nHDon	B05[C-C]
nHAcc	MaxaaCH
C-001	MDEC-11
C-002	CIC3
C-003	B06[N-O]
C-004	O-056
C-005	MCD
C-006	MATS8p
C-007	SIC1
C-008	B05[C-O]
C-009	s2_relSize
C-010	F06[O-O]
C-011	MATS4m
C-012	nDB
C-013	CATS2D_01_AA
C-014	Chi_D/Dt
C-015	nCrt
C-016	minsOH
C-017	IC0
C-018	AAC
C-019	B10[N-F]
C-020	F05[N-O]
C-021	SsCH3
C-022	nCHR2X
C-023	B05[O-F]
C-024	CATS2D_03_LL
C-025	SpPosA_X
C-026	SpMAD_X
C-027	F06[N-O]
C-028	F10[N-F]
C-029	CATS2D_03_DA
C-030	MaxsOH
C-031	F05[O-F]
C-032	MaxaasC
C-033	N-070
C-034	LOGP99
C-035	F04[C-O]
C-036	C-001
C-037	C%
C-038	CATS2D_03_DL
C-039	B05[N-O]
C-040	B01[C-O]
C-041	C-026
C-042	F02[N-N]
C-043	MDEN-33
C-044	SsssN
H-046	CATS2D_02_LL
H-047	MaxsssN
H-048	WiA_D/Dt
H-049	NsssN
H-050	F03[N-O]
H-051	Eta_alpha_A
H-052	MaxdssC
H-053	B09[O-O]
H-054	nROH
H-055	B02[N-N]
O-056	minsssN
O-057	B03[N-O]
O-058	Eta_D_AlphaB
O-059	P_VSA_MR_3
O-060	CATS2D_01_LL
O-061	CIC4
O-062	MATS8i
O-063	F09[O-O]
Se-064	B04[C-O]
Se-065	MATS5p
N-066	GATS4i
N-067	SsOH
N-068	CIC2
N-069	arLevel3
N-070	JGI4
N-071	C-002
N-072	MATS6m
N-073	MATS7m
N-074	nCp
N-075	B02[C-O]
N-076	MATS6p
N-077	ringChiralCenter
N-078	MATS5m
N-079	C-005
F-081	nX
F-082	B03[C-O]
F-083	B04[C-C]
F-084	H%
F-085	O%
Cl-086	Eta_B_A
Cl-087	P_VSA_charge_12
Cl-088	AVS_X
Cl-089	Eta_beta_A
Cl-090	phLevel3
Br-091	MATS2m
Br-092	phLevel1
Br-093	CATS2D_00_DA
Br-094	NsOH
Br-095	MATS2p
I-096	s3_numAroBonds
I-097	CIC5
I-098	SpMAD_B(m)
I-099	SssCH2
I-100	B07[O-O]
F-101	minssO
Cl-102	B10[O-O]
Br-103	CATS2D_02_AA
I-104	GATS3i
S-106	Eta_epsi_4
S-107	GATS4m
S-108	O-057
S-109	JGI5
S-110	s2_relPathLength_2
Si-111	GATS5m
B-112	CATS2D_09_DD
P-115	C-041
P-116	s3_numRotBonds
P-117	s2_phRelSize_2
P-118	F10[O-O]
P-119	F02[O-O]
P-120	H-053
SsCH3	MATS8m
SdCH2	MaxssO
SssCH2	s2_phSize
StCH	MATS1i
SdsCH	s2_pathLength
SaaCH	CIC1
SsssCH	s2_phRelSize
SddC	MaxssCH2
StsC	GATS1m
SdssC	F07[O-O]
SaasC	P_VSA_charge_11
SaaaC	P_VSA_LogP_8
SssssC	GATS5i
SsNH2	Eta_D_AlphaA
SssNH	s1_phSize
SdNH	s1_phRelSize
SsssN	s1_phRelSize_2
SdsN	s2_relPathLength
SaaN	nArOR
StN	C-043
SsNH3+	MDEC-44
SssNH2+	F09[C-S]
SdNH2+	O-060
SsssNH+	Eta_D_epsiD
SssssN+	B02[O-O]
SddsN	B09[C-S]
SaadN	SpMaxA_D/Dt
SaasN	LOGPcons
SaaNH	s1_pathLength
SsOH	s1_relPathLength_2
SdO	s1_relPathLength
SssO	D/Dtr04
SaaO	C-022
SsPH2	nR#C-
SssPH	F10[C-S]
SsssP	nR04
SdsssP	B10[C-S]
SddsP	MDEO-12
SsssssP	minaaCH
SsSH	nArCONR2
SdS	Eta_D_beta
SssS	nHM
SaaS	P_VSA_ppp_hal
SdssS	nCL
SddssS	MATS5i
SssssssS	P_VSA_e_4
SsF	B05[O-O]
SsCl	SssO
SsBr	s1_size
SsI	P_VSA_m_4
SsLi	s1_relSize
SssBe	F07[C-S]
SssssBe-	RBF
SsBH2	arLevel2
SssBH	B07[C-S]
SsssB	nCONN
SssssB-	LOC
SsGeH3	nN(CO)2
SssGeH2	Eta_D_psiA
SsssGeH	F08[C-S]
SssssGe	B08[C-S]
SsAsH2	CATS2D_02_DD
SssAsH	P_VSA_charge_5
SsssAs	F06[C-S]
SsssssAs	T(N..S)
SdsssAs	nPyrimidines
SddsAs	T(O..S)
SsSeH	F05[O-O]
SdSe	NssO
SssSe	B06[C-S]
SaaSe	AP
SdssSe	MATS3m
SssssssSe	P_VSA_charge_6
SddssSe	Mi
SsSnH3	minaasC
SssSnH2	NNRS
SsssSnH	B03[C-C]
SssssSn	SHED_AN
SsPbH3	CATS2D_05_DD
SssPbH2	MaxaasN
SsssPbH	minaasN
SssssPb	H-046
SsSiH3	SaasN
SssSiH2	Eta_epsi_A
SsssSiH	Mp
SssssSi	MaxsssCH
NsCH3	NaasN
NdCH2	CATS2D_00_DP
NssCH2	NsCl
NtCH	CATS2D_00_NN
NdsCH	X%
NaaCH	nArNR2
NsssCH	NsNH2
NddC	CATS2D_01_AN
NtsC	Eta_D_beta_A
NdssC	Eta_D_epsiC
NaasC	nArOH
NaaaC	P_VSA_ppp_N
NssssC	CATS2D_00_PP
NsNH2	Fsp3
NssNH	SHED_DN
NdNH	SsNH2
NsssN	SHED_NL
NdsN	F05[C-S]
NaaN	F01[C-Cl]
NtN	minsNH2
NsNH3+	MaxsNH2
NssNH2+	CATS2D_01_DN
NdNH2+	SsCl
NsssNH+	MATS3i
NssssN+	nBridgeHead
NddsN	B04[O-O]
NaadN	B05[C-S]
NaasN	T(F..F)
NaaNH	GATS6m
NsOH	ARR
NdO	MaxsCH3
NssO	F03[O-O]
NaaO	GATS2i
NsPH2	T(Cl..Cl)
NssPH	B03[O-O]
NsssP	Eta_L_A
NdsssP	JGT
NddsP	B08[O-O]
NsssssP	N-071
NsSH	F02[C-S]
NdS	B01[C-Cl]
NssS	F01[C-S]
NaaS	F02[C-Cl]
NdssS	P_VSA_ppp_P
NddssS	arLevel1
NssssssS	SpMAD_D/Dt
NsF	SpPosA_D/Dt
NsCl	F03[C-Cl]
NsBr	nRCONHR
NsI	F04[O-O]
NsLi	B04[N-F]
NssBe	B02[C-S]
NssssBe-	B05[N-F]
NsBH2	F-084
NssBH	F04[N-F]
NsssB	F05[N-F]
NssssB-	D/Dtr10
NsGeH3	CATS2D_02_NL
NssGeH2	GATS3m
NsssGeH	C-003
NssssGe	GATS2p
NsAsH2	F08[O-O]
NssAsH	B02[C-Cl]
NsssAs	Eta_epsi_2
NsssssAs	C-033
NdsssAs	B08[N-F]
NddsAs	N-069
NsSeH	SpPosA_B(m)
NdSe	F08[N-F]
NssSe	O-061
NaaSe	NddsN
NdssSe	B03[C-Cl]
NssssssSe	MaxddsN
NddssSe	MaxsCl
NsSnH3	minddsN
NssSnH2	SddsN
NsssSnH	B09[O-F]
NssssSn	F04[C-S]
NsPbH3	F09[O-F]
NssPbH2	minsCl
NsssPbH	B08[O-F]
NssssPb	F08[O-F]
NsSiH3	nArNH2
NssSiH2	F01[N-O]
NsssSiH	H-051
NssssSi	CATS2D_03_NL
minsCH3	B01[N-O]
mindCH2	nCb-
minssCH2	F06[N-F]
mintCH	B06[N-F]
mindsCH	B01[C-S]
minaaCH	B10[O-S]
minsssCH	B09[N-F]
minddC	F09[N-F]
mintsC	F10[O-S]
mindssC	nR10
minaasC	CATS2D_01_NL
minaaaC	GATS2m
minssssC	P_VSA_charge_14
minsNH2	B02[C-C]
minssNH	nAzetidines
mindNH	nS
minsssN	B10[O-F]
mindsN	F08[N-S]
minaaN	C-032
mintN	F10[O-F]
minsNH3+	N-076
minssNH2+	B08[N-S]
mindNH2+	nRCONR2
minsssNH+	P_VSA_MR_8
minssssN+	nArNO2
minddsN	B04[C-S]
minaadN	B07[O-S]
minaasN	B05[N-S]
minaaNH	F05[N-S]
minsOH	SpPosA_B(p)
mindO	nPyrazoles
minssO	F07[O-S]
minaaO	B09[C-Cl]
minsPH2	F09[C-Cl]
minssPH	Cl-090
minsssP	s4_numSharedNeighbors
mindsssP	F04[C-Cl]
minddsP	Eta_epsi_5
minsssssP	B01[O-S]
minsSH	P_VSA_i_1
mindS	CATS2D_04_NL
minssS	T(S..S)
minaaS	B04[C-Cl]
mindssS	B08[O-S]
minddssS	CATS2D_07_DD
minssssssS	F08[O-S]
minsF	F09[N-S]
minsCl	F01[O-S]
minsBr	B09[N-S]
minsI	N-068
minsLi	SHED_PL
minssBe	minaaS
minssssBe-	MaxaaS
minsBH2	N-067
minssBH	nImidazoles
minsssB	CATS2D_01_DA
minssssB-	nROCON
minsGeH3	F10[C-Cl]
minssGeH2	B10[C-Cl]
minsssGeH	NaaS
minssssGe	H-048
minsAsH2	SaaS
minssAsH	F06[N-S]
minsssAs	Cl-089
minsssssAs
mindsssAs
minddsAs
minsSeH
mindSe
minssSe
minaaSe
mindssSe
minssssssSe
minddssSe
minsSnH3
minssSnH2
minsssSnH
minssssSn
minsPbH3
minssPbH2
minsssPbH
minssssPb
minsSiH3
minssSiH2
minsssSiH
minssssSi
MaxsCH3
MaxdCH2
MaxssCH2
MaxtCH
MaxdsCH
MaxaaCH
MaxsssCH
MaxddC
MaxtsC
MaxdssC
MaxaasC
MaxaaaC
MaxssssC
MaxsNH2
MaxssNH
MaxdNH
MaxsssN
MaxdsN
MaxaaN
MaxtN
MaxsNH3+
MaxssNH2+
MaxdNH2+
MaxsssNH+
MaxssssN+
MaxddsN
MaxaadN
MaxaasN
MaxaaNH
MaxsOH
MaxdO
MaxssO
MaxaaO
MaxsPH2
MaxssPH
MaxsssP
MaxdsssP
MaxddsP
MaxsssssP
MaxsSH
MaxdS
MaxssS
MaxaaS
MaxdssS
MaxddssS
MaxssssssS
MaxsF
MaxsCl
MaxsBr
MaxsI
MaxsLi
MaxssBe
MaxssssBe-
MaxsBH2
MaxssBH
MaxsssB
MaxssssB-
MaxsGeH3
MaxssGeH2
MaxsssGeH
MaxssssGe
MaxsAsH2
MaxssAsH
MaxsssAs
MaxsssssAs
MaxdsssAs
MaxddsAs
MaxsSeH
MaxdSe
MaxssSe
MaxaaSe
MaxdssSe
MaxssssssSe
MaxddssSe
MaxsSnH3
MaxssSnH2
MaxsssSnH
MaxssssSn
MaxsPbH3
MaxssPbH2
MaxsssPbH
MaxssssPb
MaxsSiH3
MaxssSiH2
MaxsssSiH
MaxssssSi
CATS2D_00_DD
CATS2D_01_DD
CATS2D_02_DD
CATS2D_03_DD
CATS2D_04_DD
CATS2D_05_DD
CATS2D_06_DD
CATS2D_07_DD
CATS2D_08_DD
CATS2D_09_DD
CATS2D_00_DA
CATS2D_01_DA
CATS2D_02_DA
CATS2D_03_DA
CATS2D_04_DA
CATS2D_05_DA
CATS2D_06_DA
CATS2D_07_DA
CATS2D_08_DA
CATS2D_09_DA
CATS2D_00_DP
CATS2D_01_DP
CATS2D_02_DP
CATS2D_03_DP
CATS2D_04_DP
CATS2D_05_DP
CATS2D_06_DP
CATS2D_07_DP
CATS2D_08_DP
CATS2D_09_DP
CATS2D_00_DN
CATS2D_01_DN
CATS2D_02_DN
CATS2D_03_DN
CATS2D_04_DN
CATS2D_05_DN
CATS2D_06_DN
CATS2D_07_DN
CATS2D_08_DN
CATS2D_09_DN
CATS2D_00_DL
CATS2D_01_DL
CATS2D_02_DL
CATS2D_03_DL
CATS2D_04_DL
CATS2D_05_DL
CATS2D_06_DL
CATS2D_07_DL
CATS2D_08_DL
CATS2D_09_DL
CATS2D_00_AA
CATS2D_01_AA
CATS2D_02_AA
CATS2D_03_AA
CATS2D_04_AA
CATS2D_05_AA
CATS2D_06_AA
CATS2D_07_AA
CATS2D_08_AA
CATS2D_09_AA
CATS2D_00_AP
CATS2D_01_AP
CATS2D_02_AP
CATS2D_03_AP
CATS2D_04_AP
CATS2D_05_AP
CATS2D_06_AP
CATS2D_07_AP
CATS2D_08_AP
CATS2D_09_AP
CATS2D_00_AN
CATS2D_01_AN
CATS2D_02_AN
CATS2D_03_AN
CATS2D_04_AN
CATS2D_05_AN
CATS2D_06_AN
CATS2D_07_AN
CATS2D_08_AN
CATS2D_09_AN
CATS2D_00_AL
CATS2D_01_AL
CATS2D_02_AL
CATS2D_03_AL
CATS2D_04_AL
CATS2D_05_AL
CATS2D_06_AL
CATS2D_07_AL
CATS2D_08_AL
CATS2D_09_AL
CATS2D_00_PP
CATS2D_01_PP
CATS2D_02_PP
CATS2D_03_PP
CATS2D_04_PP
CATS2D_05_PP
CATS2D_06_PP
CATS2D_07_PP
CATS2D_08_PP
CATS2D_09_PP
CATS2D_00_PN
CATS2D_01_PN
CATS2D_02_PN
CATS2D_03_PN
CATS2D_04_PN
CATS2D_05_PN
CATS2D_06_PN
CATS2D_07_PN
CATS2D_08_PN
CATS2D_09_PN
CATS2D_00_PL
CATS2D_01_PL
CATS2D_02_PL
CATS2D_03_PL
CATS2D_04_PL
CATS2D_05_PL
CATS2D_06_PL
CATS2D_07_PL
CATS2D_08_PL
CATS2D_09_PL
CATS2D_00_NN
CATS2D_01_NN
CATS2D_02_NN
CATS2D_03_NN
CATS2D_04_NN
CATS2D_05_NN
CATS2D_06_NN
CATS2D_07_NN
CATS2D_08_NN
CATS2D_09_NN
CATS2D_00_NL
CATS2D_01_NL
CATS2D_02_NL
CATS2D_03_NL
CATS2D_04_NL
CATS2D_05_NL
CATS2D_06_NL
CATS2D_07_NL
CATS2D_08_NL
CATS2D_09_NL
CATS2D_00_LL
CATS2D_01_LL
CATS2D_02_LL
CATS2D_03_LL
CATS2D_04_LL
CATS2D_05_LL
CATS2D_06_LL
CATS2D_07_LL
CATS2D_08_LL
CATS2D_09_LL
SHED_DD
SHED_DA
SHED_DP
SHED_DN
SHED_DL
SHED_AA
SHED_AP
SHED_AN
SHED_AL
SHED_PP
SHED_PN
SHED_PL
SHED_NN
SHED_NL
SHED_LL
T(N..N)
T(N..O)
T(N..S)
T(N..P)
T(N..F)
T(N..Cl)
T(N..Br)
T(N..I)
T(O..O)
T(O..S)
T(O..P)
T(O..F)
T(O..Cl)
T(O..Br)
T(O..I)
T(S..S)
T(S..P)
T(S..F)
T(S..Cl)
T(S..Br)
T(S..I)
T(P..P)
T(P..F)
T(P..Cl)
T(P..Br)
T(P..I)
T(F..F)
T(F..Cl)
T(F..Br)
T(F..I)
T(Cl..Cl)
T(Cl..Br)
T(Cl..I)
T(Br..Br)
T(Br..I)
T(I..I)
B01[C-C]
B01[C-N]
B01[C-O]
B01[C-S]
B01[C-P]
B01[C-F]
B01[C-Cl]
B01[C-Br]
B01[C-I]
B01[C-B]
B01[C-Si]
B01[C-X]
B01[N-N]
B01[N-O]
B01[N-S]
B01[N-P]
B01[N-F]
B01[N-Cl]
B01[N-Br]
B01[N-I]
B01[N-B]
B01[N-Si]
B01[N-X]
B01[O-O]
B01[O-S]
B01[O-P]
B01[O-F]
B01[O-Cl]
B01[O-Br]
B01[O-I]
B01[O-B]
B01[O-Si]
B01[O-X]
B01[S-S]
B01[S-P]
B01[S-F]
B01[S-Cl]
B01[S-Br]
B01[S-I]
B01[S-B]
B01[S-Si]
B01[S-X]
B01[P-P]
B01[P-F]
B01[P-Cl]
B01[P-Br]
B01[P-I]
B01[P-B]
B01[P-Si]
B01[P-X]
B01[F-F]
B01[F-Cl]
B01[F-Br]
B01[F-I]
B01[F-B]
B01[F-Si]
B01[F-X]
B01[Cl-Cl]
B01[Cl-Br]
B01[Cl-I]
B01[Cl-B]
B01[Cl-Si]
B01[Cl-X]
B01[Br-Br]
B01[Br-I]
B01[Br-B]
B01[Br-Si]
B01[Br-X]
B01[I-I]
B01[I-B]
B01[I-Si]
B01[I-X]
B01[B-B]
B01[B-Si]
B01[B-X]
B01[Si-Si]
B01[Si-X]
B01[X-X]
B02[C-C]
B02[C-N]
B02[C-O]
B02[C-S]
B02[C-P]
B02[C-F]
B02[C-Cl]
B02[C-Br]
B02[C-I]
B02[C-B]
B02[C-Si]
B02[C-X]
B02[N-N]
B02[N-O]
B02[N-S]
B02[N-P]
B02[N-F]
B02[N-Cl]
B02[N-Br]
B02[N-I]
B02[N-B]
B02[N-Si]
B02[N-X]
B02[O-O]
B02[O-S]
B02[O-P]
B02[O-F]
B02[O-Cl]
B02[O-Br]
B02[O-I]
B02[O-B]
B02[O-Si]
B02[O-X]
B02[S-S]
B02[S-P]
B02[S-F]
B02[S-Cl]
B02[S-Br]
B02[S-I]
B02[S-B]
B02[S-Si]
B02[S-X]
B02[P-P]
B02[P-F]
B02[P-Cl]
B02[P-Br]
B02[P-I]
B02[P-B]
B02[P-Si]
B02[P-X]
B02[F-F]
B02[F-Cl]
B02[F-Br]
B02[F-I]
B02[F-B]
B02[F-Si]
B02[F-X]
B02[Cl-Cl]
B02[Cl-Br]
B02[Cl-I]
B02[Cl-B]
B02[Cl-Si]
B02[Cl-X]
B02[Br-Br]
B02[Br-I]
B02[Br-B]
B02[Br-Si]
B02[Br-X]
B02[I-I]
B02[I-B]
B02[I-Si]
B02[I-X]
B02[B-B]
B02[B-Si]
B02[B-X]
B02[Si-Si]
B02[Si-X]
B02[X-X]
B03[C-C]
B03[C-N]
B03[C-O]
B03[C-S]
B03[C-P]
B03[C-F]
B03[C-Cl]
B03[C-Br]
B03[C-I]
B03[C-B]
B03[C-Si]
B03[C-X]
B03[N-N]
B03[N-O]
B03[N-S]
B03[N-P]
B03[N-F]
B03[N-Cl]
B03[N-Br]
B03[N-I]
B03[N-B]
B03[N-Si]
B03[N-X]
B03[O-O]
B03[O-S]
B03[O-P]
B03[O-F]
B03[O-Cl]
B03[O-Br]
B03[O-I]
B03[O-B]
B03[O-Si]
B03[O-X]
B03[S-S]
B03[S-P]
B03[S-F]
B03[S-Cl]
B03[S-Br]
B03[S-I]
B03[S-B]
B03[S-Si]
B03[S-X]
B03[P-P]
B03[P-F]
B03[P-Cl]
B03[P-Br]
B03[P-I]
B03[P-B]
B03[P-Si]
B03[P-X]
B03[F-F]
B03[F-Cl]
B03[F-Br]
B03[F-I]
B03[F-B]
B03[F-Si]
B03[F-X]
B03[Cl-Cl]
B03[Cl-Br]
B03[Cl-I]
B03[Cl-B]
B03[Cl-Si]
B03[Cl-X]
B03[Br-Br]
B03[Br-I]
B03[Br-B]
B03[Br-Si]
B03[Br-X]
B03[I-I]
B03[I-B]
B03[I-Si]
B03[I-X]
B03[B-B]
B03[B-Si]
B03[B-X]
B03[Si-Si]
B03[Si-X]
B03[X-X]
B04[C-C]
B04[C-N]
B04[C-O]
B04[C-S]
B04[C-P]
B04[C-F]
B04[C-Cl]
B04[C-Br]
B04[C-I]
B04[C-B]
B04[C-Si]
B04[C-X]
B04[N-N]
B04[N-O]
B04[N-S]
B04[N-P]
B04[N-F]
B04[N-Cl]
B04[N-Br]
B04[N-I]
B04[N-B]
B04[N-Si]
B04[N-X]
B04[O-O]
B04[O-S]
B04[O-P]
B04[O-F]
B04[O-Cl]
B04[O-Br]
B04[O-I]
B04[O-B]
B04[O-Si]
B04[O-X]
B04[S-S]
B04[S-P]
B04[S-F]
B04[S-Cl]
B04[S-Br]
B04[S-I]
B04[S-B]
B04[S-Si]
B04[S-X]
B04[P-P]
B04[P-F]
B04[P-Cl]
B04[P-Br]
B04[P-I]
B04[P-B]
B04[P-Si]
B04[P-X]
B04[F-F]
B04[F-Cl]
B04[F-Br]
B04[F-I]
B04[F-B]
B04[F-Si]
B04[F-X]
B04[Cl-Cl]
B04[Cl-Br]
B04[Cl-I]
B04[Cl-B]
B04[Cl-Si]
B04[Cl-X]
B04[Br-Br]
B04[Br-I]
B04[Br-B]
B04[Br-Si]
B04[Br-X]
B04[I-I]
B04[I-B]
B04[I-Si]
B04[I-X]
B04[B-B]
B04[B-Si]
B04[B-X]
B04[Si-Si]
B04[Si-X]
B04[X-X]
B05[C-C]
B05[C-N]
B05[C-O]
B05[C-S]
B05[C-P]
B05[C-F]
B05[C-Cl]
B05[C-Br]
B05[C-I]
B05[C-B]
B05[C-Si]
B05[C-X]
B05[N-N]
B05[N-O]
B05[N-S]
B05[N-P]
B05[N-F]
B05[N-Cl]
B05[N-Br]
B05[N-I]
B05[N-B]
B05[N-Si]
B05[N-X]
B05[O-O]
B05[O-S]
B05[O-P]
B05[O-F]
B05[O-Cl]
B05[O-Br]
B05[O-I]
B05[O-B]
B05[O-Si]
B05[O-X]
B05[S-S]
B05[S-P]
B05[S-F]
B05[S-Cl]
B05[S-Br]
B05[S-I]
B05[S-B]
B05[S-Si]
B05[S-X]
B05[P-P]
B05[P-F]
B05[P-Cl]
B05[P-Br]
B05[P-I]
B05[P-B]
B05[P-Si]
B05[P-X]
B05[F-F]
B05[F-Cl]
B05[F-Br]
B05[F-I]
B05[F-B]
B05[F-Si]
B05[F-X]
B05[Cl-Cl]
B05[Cl-Br]
B05[Cl-I]
B05[Cl-B]
B05[Cl-Si]
B05[Cl-X]
B05[Br-Br]
B05[Br-I]
B05[Br-B]
B05[Br-Si]
B05[Br-X]
B05[I-I]
B05[I-B]
B05[I-Si]
B05[I-X]
B05[B-B]
B05[B-Si]
B05[B-X]
B05[Si-Si]
B05[Si-X]
B05[X-X]
B06[C-C]
B06[C-N]
B06[C-O]
B06[C-S]
B06[C-P]
B06[C-F]
B06[C-Cl]
B06[C-Br]
B06[C-I]
B06[C-B]
B06[C-Si]
B06[C-X]
B06[N-N]
B06[N-O]
B06[N-S]
B06[N-P]
B06[N-F]
B06[N-Cl]
B06[N-Br]
B06[N-I]
B06[N-B]
B06[N-Si]
B06[N-X]
B06[O-O]
B06[O-S]
B06[O-P]
B06[O-F]
B06[O-Cl]
B06[O-Br]
B06[O-I]
B06[O-B]
B06[O-Si]
B06[O-X]
B06[S-S]
B06[S-P]
B06[S-F]
B06[S-Cl]
[truncated: 1,231 more rows]

## Sheet: 9. CAL-27
Supplementary Data 4. The optimal combination of descriptors of each algorithm
Bioactivity dataset 1. Biological toxicology
Descriptprs-Original (n=3965)	Descriptprs-Wilcoxon (n=279)	Descriptprs-Spearman (n=87)	Descriptprs-XGBoost (n=65)	Descriptprs-DT (n=84)	Descriptprs-RFE (LR, n=23)	Descriptprs-RF (n=79)
MW	SAdon	SAdon	SAdon	CATS2D_04_DL	MATS3e	SAdon
AMW	P_VSA_ppp_D	MATS3e	MATS3e	MATS1i	CATS2D_04_DL	MATS3e
Sv	MATS3e	F03[O-O]	F03[O-O]	SHED_DA	MATS1i	F03[O-O]
Se	F03[O-O]	CATS2D_04_DL	CATS2D_04_DL	O-056	SHED_DA	CATS2D_04_DL
Sp	SHED_DD	MATS1i	MATS1i	nRNHO	O-056	MATS1i
Si	B03[O-O]	SHED_DA	SHED_DA	CATS2D_05_DL	nRNHO	SHED_DA
Mv	CATS2D_00_DD	O-056	O-056	CATS2D_00_DA	CATS2D_00_DA	O-056
Me	CATS2D_04_DL	nRNHO	CATS2D_05_DL	P_VSA_charge_3	P_VSA_charge_3	nRNHO
Mp	MATS1i	CATS2D_05_DL	P_VSA_charge_3	SpMAD_X	MATS1m	CATS2D_05_DL
Mi	SHED_DA	CATS2D_00_DA	SpMAD_X	MATS1m	GATS3e	CATS2D_00_DA
GD	MATS1p	P_VSA_charge_3	MATS1m	P_VSA_p_2	QED	P_VSA_charge_3
nAT	O-056	SpMAD_X	P_VSA_p_2	GATS3e	GATS6v	SpMAD_X
nSK	P_VSA_MR_3	MATS1m	GATS3e	LOC	CATS2D_03_DL	MATS1m
nAA	nRNHO	P_VSA_p_2	LOC	P_VSA_LogP_3	minsssN	P_VSA_p_2
nTA	F01[N-O]	GATS3e	P_VSA_LogP_3	ATSC1e	MATS2e	GATS3e
nBT	CATS2D_01_DA	LOC	ATSC1e	BIC3	F07[N-O]	LOC
nBO	CATS2D_01_DD	P_VSA_LogP_3	BIC3	SdssC	P_VSA_charge_4	P_VSA_LogP_3
nBM	B01[N-O]	ATSC1e	SdssC	QED	VE2sign_H2	ATSC1e
SCBO	CATS2D_05_DL	BIC3	QED	SHED_DL	B08[N-O]	BIC3
RBN	CATS2D_00_DA	SdssC	SHED_DL	CATS2D_09_DD	GATS8v	SdssC
RBF	NsOH	QED	CATS2D_09_DD	GATS6v	CATS2D_07_LL	QED
nDB	nROH	SHED_DL	GATS6v	P_VSA_charge_2	GATS1p	SHED_DL
nTB	P_VSA_charge_3	CATS2D_09_DD	P_VSA_charge_2	CATS2D_03_DL	C-030	CATS2D_09_DD
nAB	SpMAD_X	GATS6v	CATS2D_03_DL	CATS2D_03_DA		GATS6v
nH	SpPosA_X	P_VSA_charge_2	MaxdssC	MaxdssC		P_VSA_charge_2
nC	P_VSA_e_5	CATS2D_03_DL	RBF	RBF		CATS2D_03_DL
nN	MATS1m	CATS2D_03_DA	MDEN-23	NssNH		CATS2D_03_DA
nO	P_VSA_p_2	MaxdssC	GATS8m	MDEN-23		MaxdssC
nP	nHDon	RBF	MDEO-12	GATS8m		RBF
nS	P_VSA_ppp_A	NssNH	GATS7m	MDEO-12		NssNH
nF	Hy	MDEN-23	JGI3	GATS7m		MDEN-23
nCL	H-050	GATS8m	minsssN	JGI3		GATS8m
nBR	GATS3e	MDEO-12	MATS1v	minsssN		MDEO-12
nI	P_VSA_m_3	GATS7m	DECC	MATS1v		GATS7m
nB	LOC	JGI3	MATS4e	CATS2D_03_AA		JGI3
nHM	P_VSA_LogP_3	minsssN	MATS2e	DECC		minsssN
nHet	ATSC1e	MATS1v	F07[N-O]	MATS4e		MATS1v
nX	Eta_D_epsiD	CATS2D_03_AA	MATS2m	Eig05_AEA(dm)		CATS2D_03_AA
H%	BIC3	DECC	SpDiam_AEA(ed)	mindssC		DECC
C%	SdssC	MATS4e	Qmean	MATS2e		MATS4e
N%	QED	Eig05_AEA(dm)	P_VSA_s_6	F07[N-O]		Eig05_AEA(dm)
O%	SHED_DL	mindssC	MATS3m	MATS2m		mindssC
X%	CATS2D_09_DD	MATS2e	CATS2D_04_AA	SpDiam_AEA(ed)		MATS2e
nCsp3	GATS6v	F07[N-O]	Chi_Dz(p)	Qmean		F07[N-O]
nCsp2	P_VSA_charge_2	MATS2m	ATSC3e	P_VSA_s_6		MATS2m
nCsp	CATS2D_03_DL	SpDiam_AEA(ed)	VE2sign_B(v)	MATS3m		SpDiam_AEA(ed)
Fsp3	P_VSA_v_2	Qmean	P_VSA_charge_4	CATS2D_04_AA		Qmean
max_conj_path	CATS2D_03_DA	P_VSA_s_6	CATS2D_08_DD	F08[O-O]		P_VSA_s_6
nStructures	BIC4	MATS3m	Eig04_AEA(dm)	Chi_Dz(p)		MATS3m
totalcharge	SAacc	CATS2D_04_AA	GATS1i	ATSC3e		CATS2D_04_AA
nCIC	nO	F08[O-O]	CATS2D_07_DA	VE2sign_B(v)		Chi_Dz(p)
nCIR	MaxdssC	Chi_Dz(p)	CATS2D_06_DL	P_VSA_charge_4		ATSC3e
TRS	SsOH	ATSC3e	PW4	CATS2D_08_DD		VE2sign_B(v)
Rperim	MaxsOH	VE2sign_B(v)	GATS2v	Eig04_AEA(dm)		P_VSA_charge_4
Rbrid	minsOH	P_VSA_charge_4	JGI6	B09[N-O]		Eig04_AEA(dm)
MCD	RBF	CATS2D_08_DD	Eig02_EA(dm)	CATS2D_08_DA		CATS2D_08_DA
RFD	NssNH	Eig04_AEA(dm)	minaaaC	SpMAD_AEA(dm)		SpMAD_AEA(dm)
RCI	MDEN-23	B09[N-O]	VE1sign_Dz(p)	GATS1i		GATS1i
NRS	GATS8m	CATS2D_08_DA	minsCH3	CATS2D_07_DA		CATS2D_07_DA
NNRS	MDEO-12	SpMAD_AEA(dm)	F06[C-O]	MATS1e		MATS1e
nSpiro	SpMAD_AEA(bo)	GATS1i	GATS8v	CATS2D_06_DL		CATS2D_06_DL
nBridgeHead	GATS7m	CATS2D_07_DA	CATS2D_07_LL	PW4		PW4
nR03	GATS6p	MATS1e	GATS1p	GATS2v		GATS2v
nR04	BIC5	CATS2D_06_DL	VE2sign_Dz(i)	JGI6		JGI6
nR05	JGI3	PW4	C-030	B10[O-O]		Eig02_EA(dm)
nR06	minsssN	GATS2v		Eig02_EA(dm)		MATS5e
nR07	MATS1v	JGI6		MATS5e		minaaaC
nR08	CATS2D_03_AA	B10[O-O]		minaaaC		VE1sign_Dz(p)
nR09	T(O..O)	Eig02_EA(dm)		VE1sign_Dz(p)		VE2sign_H2
nR10	DECC	MATS5e		VE2sign_H2		minsCH3
nR11	MaxsssN	minaaaC		minsCH3		F06[C-O]
nR12	MATS4e	VE1sign_Dz(p)		B10[N-O]		GATS8v
nBnz	SpMAD_EA	VE2sign_H2		F06[C-O]		CATS2D_07_LL
ARR	SpMAD_L	minsCH3		F07[O-O]		MATS7e
AP	Eig05_AEA(dm)	B10[N-O]		B08[N-O]		GATS1p
D/Dtr03	PW2	F06[C-O]		GATS8v		VE2sign_Dz(i)
D/Dtr04	SpMAD_AEA(ri)	F07[O-O]		CATS2D_07_LL		C-030
D/Dtr05	MATS6v	B08[N-O]		MATS7e		T(N..O)
D/Dtr06	mindssC	GATS8v		GATS1p		N-072
D/Dtr07	MATS2e	CATS2D_07_LL		VE2sign_Dz(i)
D/Dtr08	SsssN	MATS7e		C-030
D/Dtr09	O%	GATS1p		O-059
D/Dtr10	F07[N-O]	VE2sign_Dz(i)		T(N..O)
D/Dtr11	SIC3	C-030		N-072
D/Dtr12	MATS2m	O-059
ZM1	MDEO-11	T(N..O)
ZM1V	NsssN	N-072
ZM1Kup	ICR
ZM1Mad	SpMAD_EA(ed)
ZM1Per	SHED_AL
ZM1MulPer	Eig02_AEA(ed)
ZM2	Eig02_EA(ed)
ZM2V	SM11_AEA(dm)
ZM2Kup	F02[C-O]
ZM2Mad	SpDiam_AEA(ed)
ZM2Per	CIC3
ZM2MulPer	MATS6p
ON0	TPSA(NO)
ON0V	Qmean
ON1	P_VSA_s_6
ON1V	B07[N-O]
Qindex	Eig01_AEA(ed)
BBI	SpMax_AEA(ed)
DBI	Eig01_EA(ed)
SNar	SM10_AEA(dm)
HNar	SpMax_EA(ed)
GNar	MATS3m
Xt	CATS2D_04_AA
Dz	MaxTD
Ram	SM15_EA(ed)
Pol	F08[O-O]
LPRS	SpMax_EA
MSD	Eig01_EA
SPI	SM09_AEA(bo)
ECC	B08[O-O]
AECC	Eig02_AEA(ri)
DECC	SpDiam_EA
MDDD	Chi_Dz(p)
UNIP	MCD
CENT	Chi_Dz(i)
VAR	SM10_AEA(bo)
ICR	Eig02_EA
MaxTD	SM14_EA(ed)
MeanTD	SM13_EA(ed)
MaxDD	SM14_AEA(ed)
MeanDD	SM07_EA(ed)
SMTI	ATSC3e
SMTIV	SIC4
GMTI	VE2sign_B(v)
GMTIV	SM13_AEA(ed)
Xu	SM15_AEA(ed)
CSI	AECC
Wap	SM14_EA
S1K	SM13_EA
S2K	P_VSA_charge_4
S3K	SpMax_L
PHI	CATS2D_08_DD
PW2	SM11_EA
PW3	SM06_EA(ed)
PW4	SpDiam_EA(ed)
PW5	Eig04_AEA(dm)
MAXDN	HVcpx
MAXDP	SM15_EA
DELS	SM11_AEA(ed)
TIE	MATS2v
BAC	SM12_EA(ed)
LOC	SM12_EA
MWC01	SM05_EA(ed)
MWC02	Chi_D
MWC03	SM08_EA(ed)
MWC04	SM12_AEA(ed)
MWC05	IDE
MWC06	Eta_B_A
MWC07	SM09_EA(ed)
MWC08	TI2_L
MWC09	SM10_AEA(ed)
MWC10	SM11_EA(ed)
SRW02	MSD
SRW03	SpPosA_Dz(p)
SRW04	SpMAD_Dz(p)
SRW05	SM10_EA(ed)
SRW06	GATS3m
SRW07	SpMaxA_Dz(p)
SRW08	SpMax_AEA(ri)
SRW09	Eig01_AEA(ri)
SRW10	B09[N-O]
MPC01	SM10_EA
MPC02	GGI3
MPC03	SM12_AEA(dm)
MPC04	Eig03_EA(ed)
MPC05	CATS2D_08_DA
MPC06	MATS7m
MPC07	CIC4
MPC08	SpMAD_AEA(dm)
MPC09	GATS1i
MPC10	SM09_EA
piPC01	SIC5
piPC02	SM09_AEA(ed)
piPC03	Eig02_EA(ri)
piPC04	SpDiam_AEA(ri)
piPC05	Chi_Dz(e)
piPC06	CATS2D_07_DA
piPC07	NssO
piPC08	Eig03_AEA(ed)
piPC09	P_VSA_s_5
piPC10	MATS1e
TWC	Chi_Dz(m)
TPC	SM1_Dz(p)
piID	CATS2D_06_DL
PCR	Chi_Dz(Z)
PCD	SpMaxA_Dz(i)
CID	SpDiam_L
BID	SpPosA_Dz(i)
ISIZ	SpMAD_Dz(i)
IAC	SssNH
AAC	VE1sign_B(v)
IDE	PW4
IDM	SM08_AEA(ed)
IDDE	Chi_Dz(v)
IDDM	TPSA(Tot)
IDET	SM08_EA
IDMT	CIC5
IVDE	GATS2v
IVDM	WiA_Dz(p)
HVcpx	SM07_EA
HDcpx	RBN
Uindex	JGI6
Vindex	VE2sign_B(e)
Xindex	MeanTD
Yindex	SM04_EA(ed)
IC0	B10[O-O]
IC1	Eig02_EA(dm)
IC2	QEDu
IC3	MATS5e
IC4	SpMAD_Dz(m)
IC5	SpMAD_Dz(Z)
TIC0	SpPosA_Dz(m)
TIC1	SpMaxA_Dz(m)
TIC2	SpPosA_Dz(Z)
TIC3	SpMaxA_Dz(Z)
TIC4	minaaaC
TIC5	WiA_D
SIC0	WiA_Dz(i)
SIC1	SpMAD_Dz(v)
SIC2	SpPosA_Dz(v)
SIC3	F10[O-O]
SIC4	VE1sign_Dz(p)
SIC5	SpMaxA_Dz(v)
CIC0	SpMAD_Dz(e)
CIC1	VE2sign_H2
CIC2	SpPosA_Dz(e)
CIC3	SpMaxA_Dz(e)
CIC4	SM03_EA(ed)
CIC5	SpPosA_D
BIC0	SM12_EA(ri)
BIC1	SpMAD_D
BIC2	SM13_EA(ri)
BIC3	SpMaxA_D
BIC4	minsCH3
BIC5	SM07_AEA(ed)
J_A	VE2sign_B(m)
SpPos_A	SM11_EA(ri)
SpPosA_A	F09[N-O]
SpPosLog_A	SM14_EA(ri)
SpMax_A	SpMAD_AEA(ed)
SpMaxA_A	B10[N-O]
SpDiam_A	SM15_EA(ri)
SpAD_A	F06[C-O]
SpMAD_A	F07[O-O]
Ho_A	SM09_EA(ri)
EE_A	SM10_EA(ri)
VE1_A	B08[N-O]
VE2_A	F01[C-O]
VE3_A	GATS8v
VE1sign_A	CATS2D_07_LL
VE2sign_A	VE2sign_B(i)
VR1_A	MATS7e
VR2_A	B07[O-O]
VR3_A	Eig02_AEA(dm)
Wi_D	PHI
WiA_D	GATS1p
AVS_D	VE2sign_Dz(i)
H_D	VE2sign_B(p)
Chi_D	WiA_Dz(m)
ChiA_D	WiA_Dz(Z)
J_D	VE1sign_Dz(i)
HyWi_D	S2K
SpPos_D	Acon
SpPosA_D	WiA_Dz(v)
SpPosLog_D	MaxsCH3
SpMax_D	SaaaC
SpMaxA_D	C-030
SpDiam_D	SpPosA_L
SpAD_D	O-059
SpMAD_D	WiA_Dz(e)
Ho_D	T(N..O)
SM2_D	Eta_epsi_2
SM3_D	N-072
SM4_D	CATS2D_08_LL
SM5_D
SM6_D
VE1_D
VE2_D
VE3_D
VE1sign_D
VE2sign_D
VR1_D
VR2_D
VR3_D
Acon
QW_L
TI1_L
TI2_L
STN_L
SpPos_L
SpPosA_L
SpPosLog_L
SpMax_L
SpMaxA_L
SpDiam_L
SpAD_L
SpMAD_L
Ho_L
EE_L
SM2_L
SM3_L
SM4_L
SM5_L
SM6_L
AVS_X
H_X
Chi_X
ChiA_X
J_X
HyWi_X
SpPos_X
SpPosA_X
SpPosLog_X
SpMax_X
SpMaxA_X
SpDiam_X
SpAD_X
SpMAD_X
Ho_X
EE_X
SM2_X
SM3_X
SM4_X
SM5_X
SM6_X
VE1_X
VE2_X
VE3_X
VE1sign_X
VE2sign_X
VR1_X
VR2_X
VR3_X
Wi_H2
WiA_H2
AVS_H2
Chi_H2
ChiA_H2
J_H2
HyWi_H2
SpPos_H2
SpPosA_H2
SpPosLog_H2
SpMax_H2
SpMaxA_H2
SpDiam_H2
SpAD_H2
SpMAD_H2
Ho_H2
EE_H2
SM2_H2
SM3_H2
SM4_H2
SM5_H2
SM6_H2
VE1_H2
VE2_H2
VE3_H2
VE1sign_H2
VE2sign_H2
VR1_H2
VR2_H2
VR3_H2
Wi_Dt
WiA_Dt
AVS_Dt
H_Dt
Chi_Dt
ChiA_Dt
J_Dt
HyWi_Dt
SpPos_Dt
SpPosA_Dt
SpPosLog_Dt
SpMax_Dt
SpMaxA_Dt
SpDiam_Dt
SpAD_Dt
SpMAD_Dt
Ho_Dt
SM2_Dt
SM3_Dt
SM4_Dt
SM5_Dt
SM6_Dt
VE1_Dt
VE2_Dt
VE3_Dt
VE1sign_Dt
VE2sign_Dt
VR1_Dt
VR2_Dt
VR3_Dt
Wi_D/Dt
WiA_D/Dt
AVS_D/Dt
H_D/Dt
Chi_D/Dt
ChiA_D/Dt
J_D/Dt
HyWi_D/Dt
SpPos_D/Dt
SpPosA_D/Dt
SpPosLog_D/Dt
SpMax_D/Dt
SpMaxA_D/Dt
SpDiam_D/Dt
SpAD_D/Dt
SpMAD_D/Dt
Ho_D/Dt
EE_D/Dt
SM2_D/Dt
SM3_D/Dt
SM4_D/Dt
SM5_D/Dt
SM6_D/Dt
Wi_Dz(Z)
WiA_Dz(Z)
AVS_Dz(Z)
H_Dz(Z)
Chi_Dz(Z)
ChiA_Dz(Z)
J_Dz(Z)
HyWi_Dz(Z)
SpAbs_Dz(Z)
SpPos_Dz(Z)
SpPosA_Dz(Z)
SpPosLog_Dz(Z)
SpMax_Dz(Z)
SpMaxA_Dz(Z)
SpDiam_Dz(Z)
SpAD_Dz(Z)
SpMAD_Dz(Z)
Ho_Dz(Z)
SM1_Dz(Z)
SM2_Dz(Z)
SM3_Dz(Z)
SM4_Dz(Z)
SM5_Dz(Z)
SM6_Dz(Z)
VE1_Dz(Z)
VE2_Dz(Z)
VE3_Dz(Z)
VE1sign_Dz(Z)
VE2sign_Dz(Z)
VR1_Dz(Z)
VR2_Dz(Z)
VR3_Dz(Z)
Wi_Dz(m)
WiA_Dz(m)
AVS_Dz(m)
H_Dz(m)
Chi_Dz(m)
ChiA_Dz(m)
J_Dz(m)
HyWi_Dz(m)
SpAbs_Dz(m)
SpPos_Dz(m)
SpPosA_Dz(m)
SpPosLog_Dz(m)
SpMax_Dz(m)
SpMaxA_Dz(m)
SpDiam_Dz(m)
SpAD_Dz(m)
SpMAD_Dz(m)
Ho_Dz(m)
SM1_Dz(m)
SM2_Dz(m)
SM3_Dz(m)
SM4_Dz(m)
SM5_Dz(m)
SM6_Dz(m)
VE1_Dz(m)
VE2_Dz(m)
VE3_Dz(m)
VE1sign_Dz(m)
VE2sign_Dz(m)
VR1_Dz(m)
VR2_Dz(m)
VR3_Dz(m)
Wi_Dz(v)
WiA_Dz(v)
AVS_Dz(v)
H_Dz(v)
Chi_Dz(v)
ChiA_Dz(v)
J_Dz(v)
HyWi_Dz(v)
SpAbs_Dz(v)
SpPos_Dz(v)
SpPosA_Dz(v)
SpPosLog_Dz(v)
SpMax_Dz(v)
SpMaxA_Dz(v)
SpDiam_Dz(v)
SpAD_Dz(v)
SpMAD_Dz(v)
Ho_Dz(v)
SM1_Dz(v)
SM2_Dz(v)
SM3_Dz(v)
SM4_Dz(v)
SM5_Dz(v)
SM6_Dz(v)
VE1_Dz(v)
VE2_Dz(v)
VE3_Dz(v)
VE1sign_Dz(v)
VE2sign_Dz(v)
VR1_Dz(v)
VR2_Dz(v)
VR3_Dz(v)
Wi_Dz(e)
WiA_Dz(e)
AVS_Dz(e)
H_Dz(e)
Chi_Dz(e)
ChiA_Dz(e)
J_Dz(e)
HyWi_Dz(e)
SpAbs_Dz(e)
SpPos_Dz(e)
SpPosA_Dz(e)
SpPosLog_Dz(e)
SpMax_Dz(e)
SpMaxA_Dz(e)
SpDiam_Dz(e)
SpAD_Dz(e)
SpMAD_Dz(e)
Ho_Dz(e)
SM1_Dz(e)
SM2_Dz(e)
SM3_Dz(e)
SM4_Dz(e)
SM5_Dz(e)
SM6_Dz(e)
VE1_Dz(e)
VE2_Dz(e)
VE3_Dz(e)
VE1sign_Dz(e)
VE2sign_Dz(e)
VR1_Dz(e)
VR2_Dz(e)
VR3_Dz(e)
Wi_Dz(p)
WiA_Dz(p)
AVS_Dz(p)
H_Dz(p)
Chi_Dz(p)
ChiA_Dz(p)
J_Dz(p)
HyWi_Dz(p)
SpAbs_Dz(p)
SpPos_Dz(p)
SpPosA_Dz(p)
SpPosLog_Dz(p)
SpMax_Dz(p)
SpMaxA_Dz(p)
SpDiam_Dz(p)
SpAD_Dz(p)
SpMAD_Dz(p)
Ho_Dz(p)
SM1_Dz(p)
SM2_Dz(p)
SM3_Dz(p)
SM4_Dz(p)
SM5_Dz(p)
SM6_Dz(p)
VE1_Dz(p)
VE2_Dz(p)
VE3_Dz(p)
VE1sign_Dz(p)
VE2sign_Dz(p)
VR1_Dz(p)
VR2_Dz(p)
VR3_Dz(p)
Wi_Dz(i)
WiA_Dz(i)
AVS_Dz(i)
H_Dz(i)
Chi_Dz(i)
ChiA_Dz(i)
J_Dz(i)
HyWi_Dz(i)
SpAbs_Dz(i)
SpPos_Dz(i)
SpPosA_Dz(i)
SpPosLog_Dz(i)
SpMax_Dz(i)
SpMaxA_Dz(i)
SpDiam_Dz(i)
SpAD_Dz(i)
SpMAD_Dz(i)
Ho_Dz(i)
SM1_Dz(i)
SM2_Dz(i)
SM3_Dz(i)
SM4_Dz(i)
SM5_Dz(i)
SM6_Dz(i)
VE1_Dz(i)
VE2_Dz(i)
VE3_Dz(i)
VE1sign_Dz(i)
VE2sign_Dz(i)
VR1_Dz(i)
VR2_Dz(i)
VR3_Dz(i)
Wi_B(m)
WiA_B(m)
AVS_B(m)
Chi_B(m)
ChiA_B(m)
J_B(m)
HyWi_B(m)
SpAbs_B(m)
SpPos_B(m)
SpPosA_B(m)
SpPosLog_B(m)
SpMax_B(m)
SpMaxA_B(m)
SpDiam_B(m)
SpAD_B(m)
SpMAD_B(m)
Ho_B(m)
EE_B(m)
SM1_B(m)
SM2_B(m)
SM3_B(m)
SM4_B(m)
SM5_B(m)
SM6_B(m)
VE1_B(m)
VE2_B(m)
VE3_B(m)
VE1sign_B(m)
VE2sign_B(m)
VR1_B(m)
VR2_B(m)
VR3_B(m)
Wi_B(v)
WiA_B(v)
AVS_B(v)
Chi_B(v)
ChiA_B(v)
J_B(v)
HyWi_B(v)
SpAbs_B(v)
SpPos_B(v)
SpPosA_B(v)
SpPosLog_B(v)
SpMax_B(v)
SpMaxA_B(v)
SpDiam_B(v)
SpAD_B(v)
SpMAD_B(v)
Ho_B(v)
EE_B(v)
SM1_B(v)
SM2_B(v)
SM3_B(v)
SM4_B(v)
SM5_B(v)
SM6_B(v)
VE1_B(v)
VE2_B(v)
VE3_B(v)
VE1sign_B(v)
VE2sign_B(v)
VR1_B(v)
VR2_B(v)
VR3_B(v)
Wi_B(e)
WiA_B(e)
AVS_B(e)
Chi_B(e)
ChiA_B(e)
J_B(e)
HyWi_B(e)
SpAbs_B(e)
SpPos_B(e)
SpPosA_B(e)
SpPosLog_B(e)
SpMax_B(e)
SpMaxA_B(e)
SpDiam_B(e)
SpAD_B(e)
SpMAD_B(e)
Ho_B(e)
EE_B(e)
SM1_B(e)
SM2_B(e)
SM3_B(e)
SM4_B(e)
SM5_B(e)
SM6_B(e)
VE1_B(e)
VE2_B(e)
VE3_B(e)
VE1sign_B(e)
VE2sign_B(e)
VR1_B(e)
VR2_B(e)
VR3_B(e)
Wi_B(p)
WiA_B(p)
AVS_B(p)
Chi_B(p)
ChiA_B(p)
J_B(p)
HyWi_B(p)
SpAbs_B(p)
SpPos_B(p)
SpPosA_B(p)
SpPosLog_B(p)
SpMax_B(p)
SpMaxA_B(p)
SpDiam_B(p)
SpAD_B(p)
SpMAD_B(p)
Ho_B(p)
EE_B(p)
SM1_B(p)
SM2_B(p)
SM3_B(p)
SM4_B(p)
SM5_B(p)
SM6_B(p)
VE1_B(p)
VE2_B(p)
VE3_B(p)
VE1sign_B(p)
VE2sign_B(p)
VR1_B(p)
VR2_B(p)
VR3_B(p)
Wi_B(i)
WiA_B(i)
AVS_B(i)
Chi_B(i)
ChiA_B(i)
J_B(i)
HyWi_B(i)
SpAbs_B(i)
SpPos_B(i)
SpPosA_B(i)
SpPosLog_B(i)
SpMax_B(i)
SpMaxA_B(i)
SpDiam_B(i)
SpAD_B(i)
SpMAD_B(i)
Ho_B(i)
EE_B(i)
SM1_B(i)
SM2_B(i)
SM3_B(i)
SM4_B(i)
SM5_B(i)
SM6_B(i)
VE1_B(i)
VE2_B(i)
VE3_B(i)
VE1sign_B(i)
VE2sign_B(i)
VR1_B(i)
VR2_B(i)
VR3_B(i)
ATS1m
ATS2m
ATS3m
ATS4m
ATS5m
ATS6m
ATS7m
ATS8m
ATS1v
ATS2v
ATS3v
ATS4v
ATS5v
ATS6v
ATS7v
ATS8v
ATS1e
ATS2e
ATS3e
ATS4e
ATS5e
ATS6e
ATS7e
ATS8e
ATS1p
ATS2p
ATS3p
ATS4p
ATS5p
ATS6p
ATS7p
ATS8p
ATS1i
ATS2i
ATS3i
ATS4i
ATS5i
ATS6i
ATS7i
ATS8i
ATSC1m
ATSC2m
ATSC3m
ATSC4m
ATSC5m
ATSC6m
ATSC7m
ATSC8m
ATSC1v
ATSC2v
ATSC3v
ATSC4v
ATSC5v
ATSC6v
ATSC7v
ATSC8v
ATSC1e
ATSC2e
ATSC3e
ATSC4e
ATSC5e
ATSC6e
ATSC7e
ATSC8e
ATSC1p
ATSC2p
ATSC3p
ATSC4p
ATSC5p
ATSC6p
ATSC7p
ATSC8p
ATSC1i
ATSC2i
ATSC3i
ATSC4i
ATSC5i
ATSC6i
ATSC7i
ATSC8i
MATS1m
MATS2m
MATS3m
MATS4m
MATS5m
MATS6m
MATS7m
MATS8m
MATS1v
MATS2v
MATS3v
MATS4v
MATS5v
MATS6v
MATS7v
MATS8v
MATS1e
MATS2e
MATS3e
MATS4e
MATS5e
MATS6e
MATS7e
MATS8e
MATS1p
MATS2p
MATS3p
MATS4p
MATS5p
MATS6p
MATS7p
MATS8p
MATS1i
MATS2i
MATS3i
MATS4i
MATS5i
MATS6i
MATS7i
MATS8i
GATS1m
GATS2m
GATS3m
GATS4m
GATS5m
GATS6m
GATS7m
GATS8m
GATS1v
GATS2v
GATS3v
GATS4v
GATS5v
GATS6v
GATS7v
GATS8v
GATS1e
GATS2e
GATS3e
GATS4e
GATS5e
GATS6e
GATS7e
GATS8e
GATS1p
GATS2p
GATS3p
GATS4p
GATS5p
GATS6p
GATS7p
GATS8p
GATS1i
GATS2i
GATS3i
GATS4i
GATS5i
GATS6i
GATS7i
GATS8i
GGI1
GGI2
GGI3
GGI4
GGI5
GGI6
GGI7
GGI8
GGI9
GGI10
JGI1
JGI2
JGI3
JGI4
JGI5
JGI6
JGI7
JGI8
JGI9
JGI10
JGT
SpMax1_Bh(m)
SpMax2_Bh(m)
SpMax3_Bh(m)
SpMax4_Bh(m)
SpMax5_Bh(m)
SpMax6_Bh(m)
SpMax7_Bh(m)
SpMax8_Bh(m)
SpMax1_Bh(v)
SpMax2_Bh(v)
SpMax3_Bh(v)
SpMax4_Bh(v)
SpMax5_Bh(v)
SpMax6_Bh(v)
SpMax7_Bh(v)
SpMax8_Bh(v)
SpMax1_Bh(e)
SpMax2_Bh(e)
SpMax3_Bh(e)
SpMax4_Bh(e)
SpMax5_Bh(e)
SpMax6_Bh(e)
SpMax7_Bh(e)
SpMax8_Bh(e)
SpMax1_Bh(p)
SpMax2_Bh(p)
SpMax3_Bh(p)
SpMax4_Bh(p)
SpMax5_Bh(p)
SpMax6_Bh(p)
SpMax7_Bh(p)
SpMax8_Bh(p)
SpMax1_Bh(i)
SpMax2_Bh(i)
SpMax3_Bh(i)
SpMax4_Bh(i)
SpMax5_Bh(i)
SpMax6_Bh(i)
SpMax7_Bh(i)
SpMax8_Bh(i)
SpMin1_Bh(m)
SpMin2_Bh(m)
SpMin3_Bh(m)
SpMin4_Bh(m)
SpMin5_Bh(m)
SpMin6_Bh(m)
SpMin7_Bh(m)
SpMin8_Bh(m)
SpMin1_Bh(v)
SpMin2_Bh(v)
SpMin3_Bh(v)
SpMin4_Bh(v)
SpMin5_Bh(v)
SpMin6_Bh(v)
SpMin7_Bh(v)
SpMin8_Bh(v)
SpMin1_Bh(e)
SpMin2_Bh(e)
SpMin3_Bh(e)
SpMin4_Bh(e)
SpMin5_Bh(e)
SpMin6_Bh(e)
SpMin7_Bh(e)
SpMin8_Bh(e)
SpMin1_Bh(p)
SpMin2_Bh(p)
SpMin3_Bh(p)
SpMin4_Bh(p)
SpMin5_Bh(p)
SpMin6_Bh(p)
SpMin7_Bh(p)
SpMin8_Bh(p)
SpMin1_Bh(i)
SpMin2_Bh(i)
SpMin3_Bh(i)
SpMin4_Bh(i)
SpMin5_Bh(i)
SpMin6_Bh(i)
SpMin7_Bh(i)
SpMin8_Bh(i)
P_VSA_LogP_1
P_VSA_LogP_2
P_VSA_LogP_3
P_VSA_LogP_4
P_VSA_LogP_5
P_VSA_LogP_6
P_VSA_LogP_7
P_VSA_LogP_8
P_VSA_MR_1
P_VSA_MR_2
P_VSA_MR_3
P_VSA_MR_4
P_VSA_MR_5
P_VSA_MR_6
P_VSA_MR_7
P_VSA_MR_8
P_VSA_m_1
P_VSA_m_2
P_VSA_m_3
P_VSA_m_4
P_VSA_m_5
P_VSA_v_1
P_VSA_v_2
P_VSA_v_3
P_VSA_v_4
P_VSA_e_1
P_VSA_e_2
P_VSA_e_3
P_VSA_e_4
P_VSA_e_5
P_VSA_e_6
P_VSA_p_1
P_VSA_p_2
P_VSA_p_3
P_VSA_p_4
P_VSA_i_1
P_VSA_i_2
P_VSA_i_3
P_VSA_i_4
P_VSA_s_1
P_VSA_s_2
P_VSA_s_3
P_VSA_s_4
P_VSA_s_5
P_VSA_s_6
P_VSA_ppp_L
P_VSA_ppp_P
P_VSA_ppp_N
P_VSA_ppp_D
P_VSA_ppp_A
P_VSA_ppp_ar
P_VSA_ppp_con
P_VSA_ppp_hal
P_VSA_ppp_cyc
P_VSA_ppp_ter
P_VSA_charge_1
P_VSA_charge_2
P_VSA_charge_3
P_VSA_charge_4
P_VSA_charge_5
P_VSA_charge_6
P_VSA_charge_7
P_VSA_charge_8
P_VSA_charge_9
P_VSA_charge_10
P_VSA_charge_11
P_VSA_charge_12
P_VSA_charge_13
P_VSA_charge_14
Eta_alpha
Eta_alpha_A
Eta_epsi
Eta_epsi_A
Eta_betaS
Eta_betaS_A
Eta_betaP
Eta_betaP_A
Eta_beta
Eta_beta_A
Eta_C
Eta_C_A
Eta_L
Eta_L_A
Eta_R
Eta_F
Eta_F_A
Eta_LR
Eta_FL
Eta_FL_A
Eta_B
Eta_B_A
Eta_sh_p
Eta_sh_y
Eta_sh_x
Eta_D_AlphaA
Eta_D_AlphaB
Eta_epsi_2
Eta_epsi_3
Eta_epsi_4
Eta_epsi_5
Eta_D_epsiA
Eta_D_epsiB
Eta_D_epsiC
Eta_D_epsiD
Eta_psi1
Eta_D_psiA
Eta_D_psiB
Eta_D_beta
Eta_D_beta_A
SpMax_EA
SpMaxA_EA
SpDiam_EA
SpAD_EA
SpMAD_EA
SpMax_EA(ed)
SpMaxA_EA(ed)
SpDiam_EA(ed)
SpAD_EA(ed)
SpMAD_EA(ed)
SpMax_EA(bo)
SpMaxA_EA(bo)
SpDiam_EA(bo)
SpAD_EA(bo)
SpMAD_EA(bo)
SpMax_EA(dm)
SpMaxA_EA(dm)
SpDiam_EA(dm)
SpAD_EA(dm)
SpMAD_EA(dm)
SpMax_EA(ri)
SpMaxA_EA(ri)
SpDiam_EA(ri)
SpAD_EA(ri)
SpMAD_EA(ri)
SpMax_AEA(ed)
SpMaxA_AEA(ed)
SpDiam_AEA(ed)
SpAD_AEA(ed)
SpMAD_AEA(ed)
SpMax_AEA(bo)
SpMaxA_AEA(bo)
SpDiam_AEA(bo)
SpAD_AEA(bo)
SpMAD_AEA(bo)
SpMax_AEA(dm)
SpMaxA_AEA(dm)
SpDiam_AEA(dm)
SpAD_AEA(dm)
SpMAD_AEA(dm)
SpMax_AEA(ri)
SpMaxA_AEA(ri)
SpDiam_AEA(ri)
SpAD_AEA(ri)
SpMAD_AEA(ri)
Chi0_EA
Chi1_EA
Chi0_EA(ed)
Chi1_EA(ed)
Chi0_EA(bo)
Chi1_EA(bo)
Chi0_EA(dm)
Chi1_EA(dm)
Chi0_EA(ri)
Chi1_EA(ri)
Chi0_AEA(ed)
Chi1_AEA(ed)
Chi0_AEA(bo)
Chi1_AEA(bo)
Chi0_AEA(dm)
Chi1_AEA(dm)
Chi0_AEA(ri)
Chi1_AEA(ri)
SM02_EA
SM03_EA
SM04_EA
SM05_EA
SM06_EA
SM07_EA
SM08_EA
SM09_EA
SM10_EA
SM11_EA
SM12_EA
SM13_EA
SM14_EA
SM15_EA
SM02_EA(ed)
SM03_EA(ed)
SM04_EA(ed)
SM05_EA(ed)
SM06_EA(ed)
SM07_EA(ed)
SM08_EA(ed)
SM09_EA(ed)
SM10_EA(ed)
SM11_EA(ed)
SM12_EA(ed)
SM13_EA(ed)
SM14_EA(ed)
SM15_EA(ed)
SM02_EA(bo)
SM03_EA(bo)
SM04_EA(bo)
SM05_EA(bo)
SM06_EA(bo)
SM07_EA(bo)
SM08_EA(bo)
SM09_EA(bo)
SM10_EA(bo)
SM11_EA(bo)
SM12_EA(bo)
SM13_EA(bo)
SM14_EA(bo)
SM15_EA(bo)
SM02_EA(dm)
SM03_EA(dm)
SM04_EA(dm)
SM05_EA(dm)
SM06_EA(dm)
SM07_EA(dm)
SM08_EA(dm)
SM09_EA(dm)
SM10_EA(dm)
SM11_EA(dm)
SM12_EA(dm)
SM13_EA(dm)
SM14_EA(dm)
SM15_EA(dm)
SM02_EA(ri)
SM03_EA(ri)
SM04_EA(ri)
SM05_EA(ri)
SM06_EA(ri)
SM07_EA(ri)
SM08_EA(ri)
SM09_EA(ri)
SM10_EA(ri)
SM11_EA(ri)
SM12_EA(ri)
SM13_EA(ri)
SM14_EA(ri)
SM15_EA(ri)
SM02_AEA(ed)
SM03_AEA(ed)
SM04_AEA(ed)
SM05_AEA(ed)
SM06_AEA(ed)
SM07_AEA(ed)
SM08_AEA(ed)
SM09_AEA(ed)
SM10_AEA(ed)
SM11_AEA(ed)
SM12_AEA(ed)
SM13_AEA(ed)
SM14_AEA(ed)
SM15_AEA(ed)
SM02_AEA(bo)
SM03_AEA(bo)
SM04_AEA(bo)
SM05_AEA(bo)
SM06_AEA(bo)
SM07_AEA(bo)
SM08_AEA(bo)
SM09_AEA(bo)
SM10_AEA(bo)
SM11_AEA(bo)
SM12_AEA(bo)
SM13_AEA(bo)
SM14_AEA(bo)
SM15_AEA(bo)
SM02_AEA(dm)
SM03_AEA(dm)
SM04_AEA(dm)
SM05_AEA(dm)
SM06_AEA(dm)
SM07_AEA(dm)
SM08_AEA(dm)
SM09_AEA(dm)
SM10_AEA(dm)
SM11_AEA(dm)
SM12_AEA(dm)
SM13_AEA(dm)
SM14_AEA(dm)
SM15_AEA(dm)
SM02_AEA(ri)
SM03_AEA(ri)
SM04_AEA(ri)
SM05_AEA(ri)
SM06_AEA(ri)
SM07_AEA(ri)
SM08_AEA(ri)
SM09_AEA(ri)
SM10_AEA(ri)
SM11_AEA(ri)
SM12_AEA(ri)
SM13_AEA(ri)
SM14_AEA(ri)
SM15_AEA(ri)
Eig01_EA
Eig02_EA
Eig03_EA
Eig04_EA
Eig05_EA
Eig06_EA
Eig07_EA
Eig08_EA
Eig09_EA
Eig10_EA
Eig11_EA
Eig12_EA
Eig13_EA
Eig14_EA
Eig15_EA
Eig01_EA(ed)
Eig02_EA(ed)
Eig03_EA(ed)
Eig04_EA(ed)
Eig05_EA(ed)
Eig06_EA(ed)
Eig07_EA(ed)
Eig08_EA(ed)
Eig09_EA(ed)
Eig10_EA(ed)
Eig11_EA(ed)
Eig12_EA(ed)
Eig13_EA(ed)
Eig14_EA(ed)
Eig15_EA(ed)
Eig01_EA(bo)
Eig02_EA(bo)
Eig03_EA(bo)
Eig04_EA(bo)
Eig05_EA(bo)
Eig06_EA(bo)
Eig07_EA(bo)
Eig08_EA(bo)
Eig09_EA(bo)
Eig10_EA(bo)
Eig11_EA(bo)
Eig12_EA(bo)
Eig13_EA(bo)
Eig14_EA(bo)
Eig15_EA(bo)
Eig01_EA(dm)
Eig02_EA(dm)
Eig03_EA(dm)
Eig04_EA(dm)
Eig05_EA(dm)
Eig06_EA(dm)
Eig07_EA(dm)
Eig08_EA(dm)
Eig09_EA(dm)
Eig10_EA(dm)
Eig11_EA(dm)
Eig12_EA(dm)
Eig13_EA(dm)
Eig14_EA(dm)
Eig15_EA(dm)
Eig01_EA(ri)
Eig02_EA(ri)
Eig03_EA(ri)
Eig04_EA(ri)
Eig05_EA(ri)
Eig06_EA(ri)
Eig07_EA(ri)
Eig08_EA(ri)
Eig09_EA(ri)
Eig10_EA(ri)
Eig11_EA(ri)
Eig12_EA(ri)
Eig13_EA(ri)
Eig14_EA(ri)
Eig15_EA(ri)
Eig01_AEA(ed)
Eig02_AEA(ed)
Eig03_AEA(ed)
Eig04_AEA(ed)
Eig05_AEA(ed)
Eig06_AEA(ed)
Eig07_AEA(ed)
Eig08_AEA(ed)
Eig09_AEA(ed)
Eig10_AEA(ed)
Eig11_AEA(ed)
Eig12_AEA(ed)
Eig13_AEA(ed)
Eig14_AEA(ed)
Eig15_AEA(ed)
Eig01_AEA(bo)
Eig02_AEA(bo)
Eig03_AEA(bo)
Eig04_AEA(bo)
Eig05_AEA(bo)
Eig06_AEA(bo)
Eig07_AEA(bo)
Eig08_AEA(bo)
Eig09_AEA(bo)
Eig10_AEA(bo)
Eig11_AEA(bo)
Eig12_AEA(bo)
Eig13_AEA(bo)
Eig14_AEA(bo)
Eig15_AEA(bo)
Eig01_AEA(dm)
Eig02_AEA(dm)
Eig03_AEA(dm)
Eig04_AEA(dm)
Eig05_AEA(dm)
Eig06_AEA(dm)
Eig07_AEA(dm)
Eig08_AEA(dm)
Eig09_AEA(dm)
Eig10_AEA(dm)
Eig11_AEA(dm)
Eig12_AEA(dm)
Eig13_AEA(dm)
Eig14_AEA(dm)
Eig15_AEA(dm)
Eig01_AEA(ri)
Eig02_AEA(ri)
Eig03_AEA(ri)
Eig04_AEA(ri)
Eig05_AEA(ri)
Eig06_AEA(ri)
Eig07_AEA(ri)
Eig08_AEA(ri)
Eig09_AEA(ri)
Eig10_AEA(ri)
Eig11_AEA(ri)
Eig12_AEA(ri)
Eig13_AEA(ri)
Eig14_AEA(ri)
Eig15_AEA(ri)
nCp
nCs
nCt
nCq
nCrs
nCrt
nCrq
nCar
nCbH
nCb-
nCconj
nR=Cp
nR=Cs
nR=Ct
n=C=
nR#CH/X
nR#C-
nROCN
nArOCN
nRNCO
nArNCO
nRSCN
nArSCN
nRNCS
nArNCS
nRCOOH
nArCOOH
nRCOOR
nArCOOR
nRCONH2
nArCONH2
nRCONHR
nArCONHR
nRCONR2
nArCONR2
nROCON
nArOCON
nRCOX
nArCOX
nRCSOH
nArCSOH
nRCSSH
nArCSSH
nRCOSR
nArCOSR
nRCSSR
nArCSSR
nRCHO
nArCHO
nRCO
nArCO
nCONN
nC=O(O)2
nN=C-N<
nC(=N)N2
nRC=N
nArC=N
nRCNO
nArCNO
nRNH2
nArNH2
nRNHR
nArNHR
nRNR2
nArNR2
nN-N
nN=N
nRCN
nArCN
nN+
nNq
nRNHO
nArNHO
nRNNOx
nArNNOx
nRNO
nArNO
nRNO2
nArNO2
nN(CO)2
nC=N-N<
nROH
nArOH
nOHp
nOHs
nOHt
nROR
nArOR
nROX
nArOX
nO(C=O)2
nH2O
nSH
nC=S
nRSR
nRSSR
nSO
nS(=O)2
nSOH
nSOOH
nSO2OH
nSO3OH
nSO2
nSO3
nSO4
nSO2N
nPO3
nPO4
nPR3
nP(=O)O2R
nP(=O)R3/nPR5
nCH2RX
nCHR2X
nCR3X
nR=CHX
nR=CRX
nR#CX
nCHRX2
nCR2X2
nR=CX2
nCRX3
nArX
nCXr
nCXr=
nCconjX
nAziridines
nOxiranes
nThiranes
nAzetidines
nOxetanes
nThioethanes
nBeta-Lactams
nPyrrolidines
nOxolanes
ntH-Thiophenes
nPyrroles
nPyrazoles
nImidazoles
nFuranes
nThiophenes
nOxazoles
nIsoxazoles
nThiazoles
nIsothiazoles
nTriazoles
nPyridines
nPyridazines
nPyrimidines
nPyrazines
n135-Triazines
n124-Triazines
nHDon
nHAcc
C-001
C-002
C-003
C-004
C-005
C-006
C-007
C-008
C-009
C-010
C-011
C-012
C-013
C-014
C-015
C-016
C-017
C-018
C-019
C-020
C-021
C-022
C-023
C-024
C-025
C-026
C-027
C-028
C-029
C-030
C-031
C-032
C-033
C-034
C-035
C-036
C-037
C-038
C-039
C-040
C-041
C-042
C-043
C-044
H-046
H-047
H-048
H-049
H-050
H-051
H-052
H-053
H-054
H-055
O-056
O-057
O-058
O-059
O-060
O-061
O-062
O-063
Se-064
Se-065
N-066
N-067
N-068
N-069
N-070
N-071
N-072
N-073
N-074
N-075
N-076
N-077
N-078
N-079
F-081
F-082
F-083
F-084
F-085
Cl-086
Cl-087
Cl-088
Cl-089
Cl-090
Br-091
Br-092
Br-093
Br-094
Br-095
I-096
I-097
I-098
I-099
I-100
F-101
Cl-102
Br-103
I-104
S-106
S-107
S-108
S-109
S-110
Si-111
B-112
P-115
P-116
P-117
P-118
P-119
P-120
SsCH3
SdCH2
SssCH2
StCH
SdsCH
SaaCH
SsssCH
SddC
StsC
SdssC
SaasC
SaaaC
SssssC
SsNH2
SssNH
SdNH
SsssN
SdsN
SaaN
StN
SsNH3+
SssNH2+
SdNH2+
SsssNH+
SssssN+
SddsN
SaadN
SaasN
SaaNH
SsOH
SdO
SssO
SaaO
SsPH2
SssPH
SsssP
SdsssP
SddsP
SsssssP
SsSH
SdS
SssS
SaaS
SdssS
SddssS
SssssssS
SsF
SsCl
SsBr
SsI
SsLi
SssBe
SssssBe-
SsBH2
SssBH
SsssB
SssssB-
SsGeH3
SssGeH2
SsssGeH
SssssGe
SsAsH2
SssAsH
SsssAs
SsssssAs
SdsssAs
SddsAs
SsSeH
SdSe
SssSe
SaaSe
SdssSe
SssssssSe
SddssSe
SsSnH3
SssSnH2
SsssSnH
SssssSn
SsPbH3
SssPbH2
SsssPbH
SssssPb
SsSiH3
SssSiH2
SsssSiH
SssssSi
NsCH3
NdCH2
NssCH2
NtCH
NdsCH
NaaCH
NsssCH
NddC
NtsC
NdssC
NaasC
NaaaC
NssssC
NsNH2
NssNH
NdNH
NsssN
NdsN
NaaN
NtN
NsNH3+
NssNH2+
NdNH2+
NsssNH+
NssssN+
NddsN
NaadN
NaasN
NaaNH
NsOH
NdO
NssO
NaaO
NsPH2
NssPH
NsssP
NdsssP
NddsP
NsssssP
NsSH
NdS
NssS
NaaS
NdssS
NddssS
NssssssS
NsF
NsCl
NsBr
NsI
NsLi
NssBe
NssssBe-
NsBH2
NssBH
NsssB
NssssB-
NsGeH3
NssGeH2
NsssGeH
NssssGe
NsAsH2
NssAsH
NsssAs
NsssssAs
NdsssAs
NddsAs
NsSeH
NdSe
NssSe
NaaSe
NdssSe
NssssssSe
NddssSe
NsSnH3
NssSnH2
NsssSnH
NssssSn
NsPbH3
NssPbH2
NsssPbH
NssssPb
NsSiH3
NssSiH2
NsssSiH
NssssSi
minsCH3
mindCH2
minssCH2
mintCH
mindsCH
minaaCH
minsssCH
minddC
mintsC
mindssC
minaasC
minaaaC
minssssC
minsNH2
minssNH
mindNH
minsssN
mindsN
minaaN
mintN
minsNH3+
minssNH2+
mindNH2+
minsssNH+
minssssN+
minddsN
minaadN
minaasN
minaaNH
minsOH
mindO
minssO
minaaO
minsPH2
minssPH
minsssP
mindsssP
minddsP
minsssssP
minsSH
mindS
minssS
minaaS
mindssS
minddssS
minssssssS
minsF
minsCl
minsBr
minsI
minsLi
minssBe
minssssBe-
minsBH2
minssBH
minsssB
minssssB-
minsGeH3
minssGeH2
minsssGeH
minssssGe
minsAsH2
minssAsH
minsssAs
minsssssAs
mindsssAs
minddsAs
minsSeH
mindSe
minssSe
minaaSe
mindssSe
minssssssSe
minddssSe
minsSnH3
minssSnH2
minsssSnH
minssssSn
minsPbH3
minssPbH2
minsssPbH
minssssPb
minsSiH3
minssSiH2
minsssSiH
minssssSi
gmin
MaxsCH3
MaxdCH2
MaxssCH2
[truncated: 1,962 more rows]
