# Supplementary material for: Development of Machine Learning Models for Precise Prediction of Bioactive Supramolecular Nucleoside Hydrogels
Source: Research Square preprint supplement (doi:10.21203/rs.3.rs-6888838/v1), 2025-07-10
Supplement: Supplementary file 10 [file 9d6b8a74e1f4ae5cc090d8fd.xlsx]

## Sheet: 1. Nontox
Supplementary Data 6. The result of the feature importance of LASSO
Descriptors	coef
MW	-0.000232428
AMW	0.00567453
Si	-0.000330286
nBT	-3.35648e-05
RBN	-0.00407335
H%	0.00111606
C%	0.00115911
N%	0.00720974
X%	-0.00188224
max_conj_path	0.00197677
nCIR	-0.00424635
Rperim	-0.000505791
D/Dtr03	0.000817979
D/Dtr04	0.00144605
D/Dtr05	-0.000367213
D/Dtr06	-0.000200302
D/Dtr07	-0.000892817
D/Dtr08	-0.000812197
D/Dtr09	0.000397908
D/Dtr10	1.34287e-05
D/Dtr11	-0.00100959
D/Dtr12	0.00072188
Pol	0.00313639
LPRS	-0.000834125
SPI	-0.0147199
ECC	-2.80727e-05
UNIP	0.000510626
CENT	-9.2717e-06
VAR	-0.000369418
MaxTD	0.0145472
MaxDD	-0.00932981
MeanDD	0.0088606
Wap	1.10862e-08
S2K	-0.00139968
PHI	-0.00111283
MAXDN	-0.00176879
DELS	4.54353e-05
BAC	0.001123
SRW09	0.00315981
piPC09	0.00454223
piPC10	0.0174691
ATS8p	0.020404
ATSC2m	0.00242837
ATSC3m	-0.00109105
ATSC4m	-0.000321758
ATSC5m	0.00307951
ATSC6m	-0.0016858
ATSC7m	-0.00021152
ATSC8m	7.51276e-06
ATSC2p	-0.000363018
ATSC3p	0.000943537
ATSC5p	0.00123559
ATSC6p	-0.00556756
ATSC8p	-0.0145062
GATS6m	0.00210901
GGI1	0.00594746
P_VSA_LogP_1	-0.00626715
P_VSA_LogP_2	-0.00226235
P_VSA_LogP_3	-0.00334709
P_VSA_LogP_4	-0.000829562
P_VSA_LogP_5	-0.00190541
P_VSA_LogP_6	-0.000900052
P_VSA_LogP_7	-0.000491738
P_VSA_LogP_8	-0.000885219
P_VSA_MR_1	-0.00103583
P_VSA_MR_2	-0.000244836
P_VSA_MR_3	0.000490976
P_VSA_MR_5	-0.00106163
P_VSA_MR_6	0.00218165
P_VSA_MR_7	3.05226e-05
P_VSA_MR_8	-0.000934041
P_VSA_m_1	0.000200995
P_VSA_m_2	-0.000355254
P_VSA_m_3	0.00298874
P_VSA_m_4	0.00293376
P_VSA_m_5	-0.000114687
P_VSA_v_1	-5.64229e-05
P_VSA_e_4	-0.000364583
P_VSA_e_6	0.000391882
P_VSA_p_4	-0.000132719
P_VSA_i_2	-0.000853597
P_VSA_i_3	-5.06306e-05
P_VSA_s_2	-0.000121371
P_VSA_s_3	-0.000867421
P_VSA_s_4	0.00101919
P_VSA_s_5	0.00176379
P_VSA_s_6	-0.000343472
P_VSA_ppp_P	0.00240724
P_VSA_ppp_N	0.00322145
P_VSA_ppp_D	0.000709021
P_VSA_ppp_A	-0.000773873
P_VSA_ppp_ar	0.000975134
P_VSA_ppp_con	0.0001625
P_VSA_ppp_hal	-0.000735364
P_VSA_ppp_cyc	-0.00102204
P_VSA_ppp_ter	0.000256495
P_VSA_charge_1	-0.000565702
P_VSA_charge_3	-0.000687453
P_VSA_charge_5	-4.04009e-05
P_VSA_charge_6	-0.00111258
P_VSA_charge_7	-0.000466875
P_VSA_charge_8	-9.68049e-05
P_VSA_charge_9	0.00032696
P_VSA_charge_10	0.00213016
P_VSA_charge_11	0.000639153
P_VSA_charge_12	-0.00541256
P_VSA_charge_13	-0.00491592
P_VSA_charge_14	-0.000379328
nCp	0.00478007
nCs	-0.00250367
nROH	-0.0102362
C-005	-0.000154791
C-016	0.0367047
C-025	-0.0105877
C-040	-0.00532521
H-046	0.0161057
H-053	-0.00697699
SssCH2	-0.0147881
SsssCH	-0.0103669
SaaN	-0.00184889
StN	0.00159179
SsOH	-5.74291e-05
SdO	-0.00166317
SssO	0.00441231
SaaO	0.00113689
SddssS	0.0272449
NdssC	-0.00547249
NaaaC	0.0103503
minsNH2	-0.00673801
minsOH	0.000954239
mindS	0.0272766
minsF	-0.00121576
minsCl	-0.00234968
MaxsOH	0.00295499
MaxdO	-0.000698365
MaxssO	0.00100527
MaxdS	0.00167813
MaxsCl	-0.00505687
CATS2D_06_DD	-0.0106374
CATS2D_08_DD	0.000662903
CATS2D_02_DA	-0.0103371
CATS2D_05_DA	0.000340516
CATS2D_06_DA	-0.000224735
CATS2D_02_DL	0.0057915
CATS2D_06_DL	0.001497
CATS2D_08_DL	-0.00399679
CATS2D_09_DL	-0.00824036
CATS2D_04_AA	-0.00892196
CATS2D_05_AA	0.000605711
CATS2D_06_AA	0.00122552
CATS2D_08_AA	-0.00651649
CATS2D_06_AP	-0.00531983
CATS2D_04_AL	0.0051417
CATS2D_05_AL	0.000465562
CATS2D_09_AL	0.00158017
CATS2D_04_PL	-0.00045038
CATS2D_09_PL	-0.00865982
CATS2D_03_NL	-0.0273443
CATS2D_04_NL	-0.00533932
CATS2D_05_NL	-0.0207094
CATS2D_07_NL	-0.00686818
CATS2D_01_LL	-0.0065259
CATS2D_02_LL	-0.00193693
CATS2D_03_LL	0.0103103
CATS2D_04_LL	0.00199893
CATS2D_06_LL	0.00730573
CATS2D_07_LL	0.00360256
SHED_DA	-0.0211781
SHED_DN	-0.0153779
SHED_DL	0.00762348
SHED_AN	-0.0152918
SHED_AL	0.00591276
T(N..N)	0.000484426
T(N..O)	7.69164e-05
T(N..P)	-0.00415057
T(N..F)	0.000799613
T(N..Cl)	0.00185632
T(O..O)	-5.21521e-05
T(O..S)	0.000707537
T(O..P)	0.00514345
T(O..F)	0.000495692
T(O..Cl)	-0.000819673
T(O..Br)	0.00123321
T(S..S)	-0.00466594
T(S..F)	-0.000576852
T(F..F)	-0.000528297
T(F..Cl)	-0.00115833
T(Cl..Cl)	-0.00337633
F02[C-C]	-0.00572762
F02[C-O]	0.000468762
F02[C-S]	-0.000530097
F02[N-N]	-0.0098163
F03[C-N]	0.00530464
F03[C-O]	-0.00361983
F03[N-O]	0.00150022
F03[O-F]	0.00868433
F04[C-O]	-0.00285849
F05[C-C]	-0.00206454
F05[C-N]	-0.00156159
F05[C-Cl]	0.0157093
F05[O-O]	8.19013e-07
F05[O-S]	-0.0140462
F06[C-C]	0.0022462
F06[C-O]	0.000509733
F06[C-S]	-0.00109832
F06[N-O]	-0.005993
F07[C-O]	0.00455843
F07[O-O]	0.001484
F08[C-N]	-0.000390211
F08[C-O]	0.00245099
F08[N-O]	-0.00590538
F09[C-N]	-0.000144192
F10[C-C]	-1.74711e-05
MR99	0.0121893
MRcons	1.01701e-15
MDEC-14	0.00907471
MDEC-24	4.73174e-05
maxDistfromCC	-0.000903161
nLevel1	-0.0119747
nLevel7	0.00396442
s2_pathLength	0.000116631
s3_pathLength	-0.00838143
s3_numSharedNeighbors	-0.00346104
s4_numRotBonds	-0.00992122
s4_numAroBonds	-0.0125303
chiralMoment	0.00611237
chiralPhMoment	0.000654347

## Sheet: 2. Anti-P. gingivalis
Descriptors	coef
C%	0.0114042
D/Dtr05	0.000618524
D/Dtr06	-0.000363656
D/Dtr09	-0.00240229
D/Dtr10	-0.000843607
D/Dtr12	-0.00766351
ZM1	0.00171438
ZM1Per	2.36759e-06
ZM2	0.00286782
ZM2V	-1.47298e-05
ZM2Per	-1.7399e-05
ZM2MulPer	-8.82112e-05
ECC	-1.38549e-05
UNIP	0.000183533
CENT	3.84042e-05
VAR	0.000327076
SMTI	2.70984e-07
SMTIV	-1.73712e-06
GMTI	1.48003e-06
GMTIV	-2.15876e-06
CSI	-1.73733e-05
Wap	-9.6215e-07
TIE	0.00240917
BAC	0.00115922
RDSQ	5.8046e-05
ISIZ	-0.000539612
IAC	-0.00625331
IDET	7.48768e-05
IDMT	-3.69186e-07
S0K	1.6938e-05
BertzCT	4.45465e-05
TIC0	-0.00542801
TIC2	0.00153209
TIC3	-0.00182912
J_A	0.00162089
Wi_D	-9.66366e-07
SpDiam_D	-0.000133607
SpAD_D	5.70831e-06
QW_L	2.28166e-07
TI1_L	-0.000115256
J_X	0.000426402
Wi_Dt	-6.73321e-06
AVS_Dt	0.000193039
SpDiam_Dt	-0.000350583
SpAD_Dt	0.000292688
Wi_D/Dt	1.53507e-05
H_D/Dt	0.000240762
Wi_Dz(Z)	-2.05434e-05
H_Dz(Z)	-0.000889336
SpAbs_Dz(Z)	0.000313642
Wi_Dz(m)	-2.85648e-06
H_Dz(m)	-0.000614385
SpAbs_Dz(m)	0.0002571
Wi_Dz(v)	-2.93152e-06
AVS_Dz(v)	0.000101566
SpAbs_Dz(v)	0.000189022
Wi_Dz(e)	-2.05345e-05
SpDiam_Dz(e)	-0.0002437
Wi_Dz(p)	1.61602e-05
AVS_Dz(p)	0.000886563
H_Dz(p)	-0.00237651
SpAbs_Dz(p)	0.000436735
SpAD_Dz(p)	5.82414e-06
Wi_Dz(i)	-5.60647e-05
SpAbs_Dz(i)	-2.97444e-05
SpDiam_Dz(i)	-0.000451682
J_B(m)	3.81464e-05
J_B(v)	0.000166689
J_B(p)	0.000140758
ATSC2s	-0.00256448
ATSC4s	-0.000812753
ATSC5s	0.00146235
ATSC6s	-8.94109e-06
ATSC7s	0.000463759
ATSC8s	-0.00161806
P_VSA_LogP_1	-0.00104506
P_VSA_LogP_3	-0.00226961
P_VSA_LogP_4	0.00109118
P_VSA_LogP_5	-2.50834e-05
P_VSA_LogP_6	-0.000862401
P_VSA_LogP_7	0.000199909
P_VSA_MR_2	-0.000286106
P_VSA_MR_5	-0.00112367
P_VSA_m_1	-2.09811e-06
P_VSA_m_2	0.00117197
P_VSA_m_3	-0.000525506
P_VSA_v_1	-2.26424e-06
P_VSA_v_2	-7.13607e-05
P_VSA_v_3	0.000952974
P_VSA_e_1	-0.000163627
P_VSA_e_2	8.45331e-05
P_VSA_p_1	-0.000292036
P_VSA_p_3	0.000232016
P_VSA_i_2	0.0038797
P_VSA_i_3	-0.00126449
P_VSA_s_2	-0.000628181
P_VSA_s_3	0.0032392
P_VSA_s_5	-0.00124607
P_VSA_s_6	0.00158999
P_VSA_ppp_L	0.000952431
P_VSA_ppp_ar	8.84011e-05
P_VSA_ppp_cyc	-0.00452236
P_VSA_charge_1	-0.000838978
P_VSA_charge_2	-3.63318e-05
P_VSA_charge_3	0.00350428
P_VSA_charge_4	0.000515175
P_VSA_charge_5	3.59786e-05
P_VSA_charge_6	-0.00124574
P_VSA_charge_7	0.00101494
P_VSA_charge_9	-0.000543522
SpAD_EA(ed)	0.00308454
SpAD_EA(dm)	-0.0037931
MaxsOH	-0.00197197
T(N..N)	2.54266e-05
T(N..O)	-0.00150758
T(N..Cl)	0.00154058
T(O..O)	0.00214609
T(O..S)	0.0227801
T(O..F)	0.00110169
T(O..Cl)	0.00498576
T(F..F)	-3.80419e-05
T(F..Cl)	-0.00830847
SAtot	-0.000350404

## Sheet: 3. Anti-HSV-1
Descriptors	coef
MW	6.35209e-05
D/Dtr05	0.000243597
D/Dtr06	4.3416e-06
D/Dtr07	4.49962e-05
D/Dtr08	-0.000302012
D/Dtr09	-0.000100396
D/Dtr11	0.00023445
D/Dtr12	0.000397115
ECC	-0.000359358
MDDD	-0.001136
UNIP	-0.000514784
CENT	-3.87392e-05
VAR	0.000345989
Wap	-6.39219e-09
DELS	9.34996e-05
BAC	-0.000398426
IDET	-6.23331e-06
IDMT	-6.65767e-06
Uindex	-0.000924797
TIC3	-0.000378168
TIC5	9.40007e-05
Wi_D	5.1061e-05
SpAD_D	0.00021044
QW_L	3.87502e-05
TI1_L	-0.000139209
Wi_Dt	4.12332e-06
AVS_Dt	-0.000439528
SpPos_Dt	1.43657e-05
SpDiam_Dt	0.000357714
SpAD_Dt	3.60973e-05
H_D/Dt	3.59077e-05
Wi_Dz(Z)	3.51497e-05
Wi_Dz(m)	1.08351e-06
Wi_Dz(e)	-9.74928e-05
Wi_Dz(p)	3.24821e-05
AVS_Dz(p)	0.000452308
SpDiam_Dz(p)	-0.000563512
Wi_Dz(i)	1.24946e-05
AVS_Dz(i)	4.68728e-05
SpAbs_Dz(i)	0.000301118
SpDiam_Dz(i)	0.000309303
ATSC5m	0.000701112
ATSC6m	-0.000598303
P_VSA_LogP_2	0.000351161
P_VSA_LogP_3	-0.00087455
P_VSA_LogP_4	-0.000430293
P_VSA_LogP_5	0.000685378
P_VSA_LogP_7	0.000850851
P_VSA_LogP_8	-0.000233723
P_VSA_MR_1	-0.000100738
P_VSA_MR_2	0.000206127
P_VSA_MR_5	-0.000770873
P_VSA_MR_6	-0.00110527
P_VSA_MR_7	0.000539622
P_VSA_m_1	-0.000485279
P_VSA_m_2	0.000224611
P_VSA_m_4	-0.000617146
P_VSA_v_1	-1.44661e-05
P_VSA_e_1	-0.000473736
P_VSA_i_1	-0.000355368
P_VSA_i_2	0.000696961
P_VSA_i_3	-2.22593e-05
P_VSA_s_2	-0.000250351
P_VSA_s_3	-0.00146712
P_VSA_s_4	0.000598195
P_VSA_s_5	-0.000446394
P_VSA_ppp_L	0.000315542
P_VSA_ppp_P	0.00103504
P_VSA_ppp_N	0.000535358
P_VSA_ppp_D	0.00123079
P_VSA_ppp_ar	-0.000254554
P_VSA_ppp_con	2.90769e-05
P_VSA_ppp_cyc	0.000356022
P_VSA_charge_2	0.000495238
P_VSA_charge_4	-0.000127706
P_VSA_charge_5	-5.6492e-05
P_VSA_charge_8	0.000197521
P_VSA_charge_9	0.000324636
P_VSA_charge_10	0.000289817
P_VSA_charge_11	-0.000841406
P_VSA_charge_12	-0.000394917
SpAD_EA(ed)	0.000183342
SpAD_EA(dm)	-0.000245021
Chi1_EA(dm)	-0.000963616
SM15_EA(dm)	0.00245745
minsOH	-0.0014254
minaaO	-0.00452823
CATS2D_08_LL	-0.0002186
T(N..O)	-0.000172915
T(N..S)	0.00165959
T(N..F)	-0.000326862
T(O..O)	0.000314937
T(O..S)	-0.000623131
T(O..Cl)	-0.000287407
T(S..S)	0.000901992
T(S..F)	-0.000499745
T(S..Cl)	-0.00141227
T(F..Cl)	-0.00174243
F06[C-O]	-0.000221063
F10[C-O]	-0.00140255
Vx	0.000389467
s34_size	-0.000178035

## Sheet: 4. Anti-VZV
Descriptors	coef
MW	-0.000280505
N%	-0.0216677
D/Dtr03	0.00231611
D/Dtr04	0.000613327
D/Dtr05	0.000933555
D/Dtr06	0.000301723
D/Dtr08	0.000787494
D/Dtr09	0.000973841
D/Dtr10	0.000642765
D/Dtr12	-0.00122369
LPRS	-0.000151766
ECC	0.000490319
MDDD	0.0168023
UNIP	-0.00202994
CENT	-0.000107184
VAR	-0.000674968
MaxDD	0.00946163
Wap	5.61242e-08
DELS	-0.000736555
TIE	-0.000705885
BAC	-0.000298321
ISIZ	-0.00017461
IDET	0.00017383
IDMT	-1.62972e-06
Uindex	0.000864448
TIC1	-0.00265483
TIC2	-0.000284599
TIC3	0.00358133
TIC4	-0.00120359
TIC5	-0.0025544
J_A	0.00063133
Wi_D	2.80328e-05
AVS_D	-0.000761748
SpDiam_D	0.000586416
SpAD_D	-0.000311871
QW_L	-3.2733e-05
TI1_L	-0.000399937
J_X	0.000695843
Wi_Dt	1.83763e-05
AVS_Dt	-0.000682092
SpPos_Dt	-0.000179393
SpDiam_Dt	-0.00027905
SpAD_Dt	7.45929e-05
Wi_D/Dt	0.000882552
H_D/Dt	5.7298e-05
Wi_Dz(Z)	-3.33817e-05
AVS_Dz(Z)	-0.000888198
SpAbs_Dz(Z)	3.21648e-05
SpDiam_Dz(Z)	2.44633e-05
Wi_Dz(m)	2.34429e-05
AVS_Dz(m)	-0.000791936
SpDiam_Dz(m)	2.02838e-05
Wi_Dz(v)	2.64784e-05
AVS_Dz(v)	-0.00073125
H_Dz(v)	0.0004198
SpAbs_Dz(v)	-5.0418e-05
SpDiam_Dz(v)	0.000294834
SpAD_Dz(v)	-0.000164758
Wi_Dz(e)	-2.39249e-05
AVS_Dz(e)	-0.000392663
SpAbs_Dz(e)	-3.4803e-07
SpDiam_Dz(e)	0.000440562
SpAD_Dz(e)	-0.000215934
Wi_Dz(p)	6.45094e-05
AVS_Dz(p)	-0.000399536
SpAbs_Dz(p)	-2.82716e-05
SpDiam_Dz(p)	0.00025741
SpAD_Dz(p)	-0.000183884
Wi_Dz(i)	-8.65678e-05
AVS_Dz(i)	-1.30915e-05
H_Dz(i)	-5.46156e-05
SpDiam_Dz(i)	0.000480441
SpAD_Dz(i)	-0.000264568
ATSC2m	0.014777
ATSC3m	-0.00357397
ATSC4m	0.000302189
ATSC6m	-0.00169999
ATSC7m	-0.00135497
ATSC8m	0.000704971
ATSC6v	0.0147856
P_VSA_LogP_1	-0.00769637
P_VSA_LogP_2	-0.00383244
P_VSA_LogP_3	-0.00312162
P_VSA_LogP_4	-0.00257333
P_VSA_LogP_6	0.000472843
P_VSA_LogP_7	0.000624277
P_VSA_LogP_8	-0.00032141
P_VSA_MR_2	7.55448e-06
P_VSA_MR_3	-0.000887707
P_VSA_MR_5	-0.000468821
P_VSA_MR_6	-0.000980958
P_VSA_MR_8	-0.00224801
P_VSA_m_1	-0.000308248
P_VSA_m_2	-0.000242964
P_VSA_m_3	0.00221429
P_VSA_m_5	4.23354e-05
P_VSA_v_2	0.00129963
P_VSA_v_3	0.00019301
P_VSA_e_1	-0.000204073
P_VSA_e_2	0.000222608
P_VSA_e_3	0.00461932
P_VSA_e_4	-0.00275665
P_VSA_e_5	0.00067194
P_VSA_p_1	-0.0001138
P_VSA_p_3	0.00114154
P_VSA_i_1	0.0047879
P_VSA_i_3	-7.98378e-05
P_VSA_s_2	-0.000260616
P_VSA_s_5	-0.00282307
P_VSA_s_6	0.00333449
P_VSA_ppp_L	0.000263241
P_VSA_ppp_P	0.00225918
P_VSA_ppp_N	0.00345173
P_VSA_ppp_D	-0.00156031
P_VSA_ppp_A	-0.00259934
P_VSA_ppp_ar	-0.00123818
P_VSA_ppp_hal	-0.000166352
P_VSA_ppp_cyc	0.000715253
P_VSA_ppp_ter	0.001176
P_VSA_charge_1	0.00111411
P_VSA_charge_2	0.00255765
P_VSA_charge_3	-0.000718913
P_VSA_charge_4	4.81954e-05
P_VSA_charge_5	-0.00129964
P_VSA_charge_6	-0.000732239
P_VSA_charge_7	-0.00128077
P_VSA_charge_8	-1.84701e-05
P_VSA_charge_9	0.000274039
P_VSA_charge_10	0.00310528
P_VSA_charge_11	-0.00782292
P_VSA_charge_13	0.00215781
P_VSA_charge_14	-0.0139874
SpAD_EA(ed)	-3.31488e-05
SpDiam_EA(dm)	0.000972073
SpAD_EA(dm)	-0.02035
Chi1_EA(dm)	0.00658788
SM07_EA(dm)	-0.000249909
SM11_AEA(dm)	-0.0129011
SM03_AEA(ri)	-0.00201129
Eig02_EA(ed)	-0.00109275
Eig08_EA(ed)	-8.81657e-05
nCs	-0.011228
nCrs	-0.0047538
C-002	-0.000922409
H-046	0.00951686
H-051	-0.00421542
SssCH2	-0.0206693
SdO	0.00640722
SaaO	-0.00626779
minsOH	-0.000288832
mindO	0.005898
minssO	-0.00937983
minsCl	0.00126258
MaxaaN	0.00677523
CATS2D_02_DL	0.00377138
CATS2D_04_DL	0.0103123
CATS2D_03_AA	0.00479664
CATS2D_06_AA	0.0150277
CATS2D_09_AA	0.00154151
CATS2D_08_AP	-0.00883126
CATS2D_04_AL	0.00426889
CATS2D_05_AL	-0.00881145
CATS2D_06_AL	-0.00197263
CATS2D_09_AL	-0.00580708
CATS2D_07_PL	-0.0174003
CATS2D_05_LL	0.00716299
CATS2D_08_LL	0.0129046
CATS2D_09_LL	-0.00385856
SHED_DL	0.00505635
SHED_AP	0.000796122
SHED_AL	0.00647784
SHED_PL	-0.00164905
SHED_NL	0.00562437
SHED_LL	0.000569922
T(N..N)	0.0012778
T(N..O)	-0.00101219
T(N..S)	0.000208718
T(N..P)	0.0030751
T(N..F)	-0.000804757
T(N..Cl)	-0.000615003
T(N..Br)	0.00634382
T(O..O)	-0.000282089
T(O..S)	-0.00413135
T(O..P)	0.000986169
T(O..F)	0.000858439
T(O..Cl)	-0.000569601
T(O..I)	0.000966693
T(S..S)	-0.0131378
T(S..F)	-0.00156362
T(S..Cl)	-0.000955255
T(F..F)	0.0039081
F02[C-C]	0.000665429
F02[C-N]	-0.00195729
F03[C-C]	-0.00153273
F03[C-N]	0.0228655
F03[C-O]	0.000827996
F03[N-N]	-0.00648356
F04[C-O]	0.00425652
F04[N-O]	0.0248799
F05[C-N]	-0.00631477
F05[C-O]	0.00148291
F05[C-S]	-0.00768841
F06[C-C]	-0.000313965
F06[C-N]	0.00292453
F06[C-O]	0.0183163
F07[C-N]	-0.00824591
F07[C-O]	0.0046554
F08[C-C]	-0.0168305
F09[C-C]	0.0200883
F09[C-N]	-0.00279752
F09[C-O]	-0.00735288
F09[N-P]	0.0356364
F10[C-C]	0.0048402
F10[C-N]	0.00105229
F10[C-O]	-0.000243795
F10[C-S]	0.0247551
TPSA(NO)	-0.00124894
SAacc	-0.00392419
SAdon	0.0018312
Vx	-5.23121e-05
ringChiralCenter	0.0120138
maxDistfromCC	0.0248891
nLevel4	-0.0194612
nLevel6	-0.00549944
nLevel10	0.0020708
phLevel3	0.0875468
arLevel3	0.0352858
s3_size	-0.00504787
s4_size	0.00505469
s3_pathLength	-0.00546279
s4_pathLength	0.00154378
s3_numSharedNeighbors	-0.00568059
s3_numAroBonds	0.00700668
s4_numAroBonds	0.000112464
s34_phSize	-0.0240002
chiralPhMoment	-0.0108508

## Sheet: 5. Anti-EBV
Descriptors	coef
MW	-0.00058944
max_conj_path	0.00624352
D/Dtr05	0.000787478
D/Dtr06	-0.000184116
D/Dtr08	0.000935922
D/Dtr09	0.000123137
D/Dtr10	-0.000300747
D/Dtr11	0.000327633
D/Dtr12	0.000758985
ZM1Kup	0.000140061
ZM2V	-7.63234e-05
ZM2Kup	-0.00212703
ZM2Mad	0.00131718
ZM2Per	0.000686804
LPRS	0.00162178
ECC	0.000924745
UNIP	-0.000319733
CENT	2.1615e-07
VAR	-0.000100244
MaxTD	0.00374308
SMTI	-3.97793e-06
SMTIV	-8.51416e-07
GMTI	1.24917e-06
GMTIV	-1.2248e-06
CSI	0.000405103
Wap	-1.33399e-06
MAXDN	0.00526248
TIE	-0.00181122
BAC	0.00439599
SRW09	-0.0160274
ISIZ	-0.0010849
IDET	3.00846e-05
IDMT	-2.96212e-07
Uindex	-0.00275334
TIC2	-0.000223868
TIC3	0.00128426
TIC4	-0.000177007
TIC5	-0.000330338
Wi_D	2.63971e-06
AVS_D	0.000185359
H_D	-0.00073205
SpPos_D	0.000210753
SpDiam_D	0.000203987
SpAD_D	-2.70676e-05
QW_L	-2.16698e-05
J_X	6.53334e-05
Wi_Dt	7.6536e-06
SpPos_Dt	-0.000251509
SpDiam_Dt	-0.00035182
SpAD_Dt	0.000202251
Wi_D/Dt	0.0003026
H_D/Dt	0.000485019
Wi_Dz(Z)	-3.83013e-05
AVS_Dz(Z)	-3.59288e-05
H_Dz(Z)	-0.000300129
SpDiam_Dz(Z)	-0.000139103
SpAD_Dz(Z)	6.19935e-05
Wi_Dz(m)	4.18282e-06
AVS_Dz(m)	-2.24563e-05
H_Dz(m)	-0.00028109
SpDiam_Dz(m)	-0.00014311
SpAD_Dz(m)	6.19626e-05
Wi_Dz(v)	1.77538e-06
AVS_Dz(v)	-0.000469932
SpAbs_Dz(v)	-2.43376e-06
SpDiam_Dz(v)	-0.000282296
SpAD_Dz(v)	0.000146845
Wi_Dz(e)	1.6376e-05
AVS_Dz(e)	-6.32041e-05
H_Dz(e)	-0.000271156
SpAbs_Dz(e)	-4.02554e-05
SpDiam_Dz(e)	-8.39866e-05
SpAD_Dz(e)	2.58007e-05
Wi_Dz(p)	2.07453e-06
AVS_Dz(p)	-0.000793665
H_Dz(p)	0.00355138
SpAbs_Dz(p)	-0.000173057
SpDiam_Dz(p)	-0.000448915
SpAD_Dz(p)	0.000271655
Wi_Dz(i)	2.58158e-05
AVS_Dz(i)	-0.000109384
H_Dz(i)	-0.00131692
SpAbs_Dz(i)	9.87663e-05
SpDiam_Dz(i)	-7.475e-05
SpAD_Dz(i)	5.18034e-05
ATSC2m	-0.00787903
ATSC4m	0.00152534
ATSC5m	-0.00604161
ATSC6m	-0.010925
ATSC7m	-5.70707e-05
ATSC8m	0.000955974
ATSC7v	-0.00250689
P_VSA_LogP_1	-0.00144088
P_VSA_LogP_2	-0.000343595
P_VSA_LogP_4	0.000834965
P_VSA_LogP_5	0.00225966
P_VSA_LogP_6	-0.00216534
P_VSA_LogP_7	0.00252292
P_VSA_MR_1	0.000108671
P_VSA_MR_2	-0.000780059
P_VSA_MR_5	-0.00109269
P_VSA_MR_7	0.00106542
P_VSA_MR_8	-0.000418022
P_VSA_m_1	-0.000198675
P_VSA_m_3	0.0024156
P_VSA_v_1	-8.62053e-05
P_VSA_v_3	0.000279414
P_VSA_e_1	-0.000138791
P_VSA_e_5	0.000433385
P_VSA_p_3	0.00303318
P_VSA_i_1	-0.00140648
P_VSA_i_2	0.00301713
P_VSA_i_3	-0.000425824
P_VSA_i_4	-6.62333e-05
P_VSA_s_2	-0.000587724
P_VSA_s_3	0.000386223
P_VSA_s_4	-0.00162699
P_VSA_s_5	6.42334e-05
P_VSA_s_6	0.00193588
P_VSA_ppp_N	0.00198071
P_VSA_ppp_D	-0.00174599
P_VSA_ppp_A	-0.00246776
P_VSA_ppp_ar	-0.000500902
P_VSA_ppp_con	-0.00111792
P_VSA_ppp_hal	-0.00528797
P_VSA_ppp_cyc	0.000522968
P_VSA_charge_2	-0.000937826
P_VSA_charge_3	0.000824375
P_VSA_charge_4	-0.00033122
P_VSA_charge_5	0.000198681
P_VSA_charge_6	0.000630249
P_VSA_charge_7	0.00180919
P_VSA_charge_8	-2.02639e-07
P_VSA_charge_9	-0.000751434
P_VSA_charge_10	0.00308363
P_VSA_charge_11	0.00753061
P_VSA_charge_12	-0.00167469
P_VSA_charge_13	-0.000160244
SpAD_EA(ed)	-0.000564153
SpAD_EA(bo)	-0.00505981
SpAD_EA(dm)	-0.0215957
Chi0_EA(dm)	-0.0014221
Chi1_EA(dm)	0.00768827
SM15_EA(dm)	0.00698605
SM05_AEA(ri)	-0.0101905
Eig09_EA(ed)	-0.016732
Eig10_EA(ed)	-0.000133627
SaaN	-0.0102891
SdO	0.00178858
minssNH	0.000733447
minaaN	-0.00880843
mindO	0.00228222
minaaO	0.00207162
minsF	-0.00270833
CATS2D_03_DL	-0.00191963
CATS2D_04_DL	0.00923106
CATS2D_07_DL	0.00928873
CATS2D_08_DL	0.00150857
CATS2D_05_AA	0.00255218
CATS2D_08_AA	-0.000436969
CATS2D_02_AL	-0.00946182
CATS2D_04_AL	-0.000461651
CATS2D_06_AL	0.00755627
CATS2D_08_AL	0.000419303
CATS2D_09_AL	-0.00431577
CATS2D_02_LL	-0.0109079
CATS2D_08_LL	0.00484224
CATS2D_09_LL	0.00596764
SHED_DL	0.00359743
T(N..N)	-5.25435e-06
T(N..O)	0.000174244
T(N..S)	0.00137068
T(N..F)	-0.000377781
T(N..Cl)	-0.00160784
T(O..O)	8.26935e-05
T(O..S)	-0.00367824
T(O..F)	0.00171836
T(O..Cl)	0.000905195
T(O..Br)	-0.00212285
T(S..S)	-0.00651025
F03[C-O]	0.00736272
F04[C-N]	0.000750078
F04[C-O]	-0.0161246
F05[C-N]	-0.00432145
F05[O-O]	0.0222323
F06[C-C]	-0.00877149
F06[C-O]	0.00434627
F08[C-N]	0.0166201
F08[C-O]	-0.0027292
F09[C-C]	-0.00185392
F10[C-O]	0.0112063
MR99	0.00478324
MRcons	1.33566e-16
TPSA(Tot)	0.00239205
SAtot	-0.000244574
SAdon	-0.00016621
Vx	-0.000542593
VvdwZAZ	0.000487101
MDEC-24	0.000121383
s3_size	-0.00646601
s4_numRotBonds	0.00180855
s2_numAroBonds	-0.0145016
s34_size	-0.00315526

## Sheet: 6. Anti-HIV
Descriptors	coef
MW	8.49253e-06
SCBO	0.00310993
RBN	0.00347678
nH	-0.00723191
H%	0.00633439
N%	0.00911109
O%	-0.00754835
nCsp3	-0.00357853
nCsp2	0.0097779
max_conj_path	-0.0123852
nCIR	-0.0021038
nBridgeHead	-0.0137336
nR06	0.0263692
nR07	0.0076872
nR08	-0.0312747
nR09	0.01549
Pol	0.0137399
LPRS	-0.00219873
ECC	-0.000217625
MDDD	-0.00121184
UNIP	-0.000325606
CENT	7.44875e-06
VAR	-0.000131223
MaxTD	-0.00907222
MeanDD	0.00220305
Wap	4.07107e-09
MAXDN	-0.00723568
MAXDP	0.000232173
DELS	1.24409e-05
BAC	0.000141486
SRW05	-0.0216307
SRW09	0.00265472
ISIZ	-8.1228e-05
IAC	0.00178454
IDET	-4.48629e-06
IDMT	5.36606e-08
Uindex	-0.00291514
TIC0	0.00426967
TIC1	0.0021547
TIC2	-0.00107565
TIC3	-0.000737065
TIC4	0.000455822
TIC5	-3.47862e-05
J_A	0.000849705
Wi_D	-2.97149e-06
AVS_D	0.000150728
H_D	-0.000134748
SpPos_D	-7.12347e-05
SpMax_D	1.15718e-06
SpDiam_D	8.8843e-05
SpAD_D	-6.0762e-05
QW_L	-9.7841e-08
TI1_L	-7.2103e-05
SpPos_L	0.000568469
H_X	0.000931244
J_X	0.000375762
Wi_H2	-0.000316388
J_H2	-0.000626606
Wi_Dz(Z)	-8.53761e-07
AVS_Dz(Z)	0.000149528
H_Dz(Z)	-0.000186376
J_Dz(Z)	-0.00648228
SpAbs_Dz(Z)	4.09355e-05
SpMax_Dz(Z)	1.6715e-05
SpDiam_Dz(Z)	9.49973e-05
SpAD_Dz(Z)	-6.97603e-05
Wi_Dz(m)	-6.51212e-07
AVS_Dz(m)	0.000118371
H_Dz(m)	8.87765e-05
J_Dz(m)	-0.000995127
SpAbs_Dz(m)	-2.29677e-05
SpMax_Dz(m)	4.18067e-06
SpDiam_Dz(m)	9.37041e-05
SpAD_Dz(m)	-6.86891e-05
Wi_Dz(v)	-6.01396e-07
AVS_Dz(v)	7.08079e-05
H_Dz(v)	0.000165278
SpAbs_Dz(v)	-2.56986e-05
SpMax_Dz(v)	6.41061e-07
SpDiam_Dz(v)	5.04762e-05
SpAD_Dz(v)	-3.89464e-05
Wi_Dz(e)	-1.76821e-07
AVS_Dz(e)	0.000276406
H_Dz(e)	-0.000345266
SpAbs_Dz(e)	4.07435e-05
SpMax_Dz(e)	8.77789e-06
SpDiam_Dz(e)	0.0001487
SpAD_Dz(e)	-0.000105468
Wi_Dz(p)	-1.37018e-06
AVS_Dz(p)	-8.55106e-06
H_Dz(p)	0.000716451
SpAbs_Dz(p)	-6.92666e-05
SpMax_Dz(p)	2.19144e-05
SpDiam_Dz(p)	4.74246e-05
SpAD_Dz(p)	-4.68905e-05
Wi_Dz(i)	9.32336e-07
AVS_Dz(i)	0.000402491
H_Dz(i)	-0.000923542
SpAbs_Dz(i)	0.000149269
SpMax_Dz(i)	7.64586e-06
SpDiam_Dz(i)	0.000211203
SpAD_Dz(i)	-0.000149215
J_B(m)	-8.09742e-05
SpAD_B(m)	0.000267333
J_B(v)	-2.28398e-05
SpAD_B(v)	0.00146836
J_B(e)	-0.000198568
SpAD_B(e)	0.000841822
J_B(p)	-6.48252e-05
SpAD_B(p)	0.000274269
J_B(i)	-7.9735e-05
SpAbs_B(i)	-0.000179137
SpAD_B(i)	0.000412301
ATSC1m	-0.000218211
ATSC2m	-0.00672079
ATSC3m	-0.00356239
ATSC4m	0.00349395
ATSC5m	0.00113867
ATSC6m	0.000362832
ATSC7m	0.00133716
ATSC8m	0.00293922
ATSC4v	-0.0231157
ATSC5v	-0.0138748
ATSC6v	-0.00589542
ATSC7v	-0.00804736
ATSC8v	0.00478926
ATSC7p	-0.004042
P_VSA_LogP_1	-0.00479566
P_VSA_LogP_2	0.00145349
P_VSA_LogP_3	-0.00172016
P_VSA_LogP_4	0.00141451
P_VSA_LogP_5	0.00173609
P_VSA_LogP_6	-1.67083e-05
P_VSA_LogP_7	0.000567351
P_VSA_LogP_8	0.000313048
P_VSA_MR_1	-0.000733687
P_VSA_MR_2	-6.68586e-05
P_VSA_MR_3	0.00270825
P_VSA_MR_4	0.0312053
P_VSA_MR_5	-0.000831369
P_VSA_MR_6	-9.40435e-05
P_VSA_MR_7	0.00130832
P_VSA_MR_8	0.00165637
P_VSA_m_1	0.000239628
P_VSA_m_2	0.00064459
P_VSA_m_3	-0.00124446
P_VSA_m_4	0.000392967
P_VSA_m_5	-0.000169415
P_VSA_v_1	0.000157967
P_VSA_v_2	-0.000205204
P_VSA_v_3	0.000601002
P_VSA_e_1	7.75829e-06
P_VSA_e_2	0.00100437
P_VSA_e_3	-0.00166132
P_VSA_e_5	-0.000740812
P_VSA_e_6	7.94852e-08
P_VSA_p_1	8.20965e-05
P_VSA_p_2	-1.91921e-05
P_VSA_p_4	0.000826854
P_VSA_i_2	2.63002e-05
P_VSA_i_3	-4.88487e-05
P_VSA_i_4	0.000367091
P_VSA_s_1	0.000655351
P_VSA_s_2	9.23519e-05
P_VSA_s_3	0.000281491
P_VSA_s_4	-0.00155981
P_VSA_s_6	-0.00218218
P_VSA_ppp_L	-0.00661531
P_VSA_ppp_P	-0.0029469
P_VSA_ppp_N	0.016746
P_VSA_ppp_D	0.00288429
P_VSA_ppp_A	2.46997e-05
P_VSA_ppp_ar	0.00338291
P_VSA_ppp_con	-0.00249892
P_VSA_ppp_hal	1.96914e-05
P_VSA_ppp_cyc	-0.00233979
P_VSA_ppp_ter	-2.35049e-05
P_VSA_charge_1	0.00150332
P_VSA_charge_2	0.00222989
P_VSA_charge_3	0.00298944
P_VSA_charge_4	0.00293208
P_VSA_charge_5	0.000760382
P_VSA_charge_6	0.0042621
P_VSA_charge_7	0.00255427
P_VSA_charge_8	0.000883395
P_VSA_charge_9	0.00117501
P_VSA_charge_10	0.00144596
P_VSA_charge_11	0.00109769
P_VSA_charge_13	-0.0159608
P_VSA_charge_14	-0.0166141
Eta_epsi	0.000293989
Eta_R	0.000412426
Eta_F	0.00369428
SpAD_EA	0.000296688
SpAD_EA(ed)	0.00106595
SpAD_EA(bo)	0.000431938
SpAD_EA(dm)	0.00363984
Chi0_EA(dm)	0.00260147
Chi1_EA(dm)	-8.63283e-05
SM15_EA(bo)	0.00718584
SM14_EA(dm)	-0.0021897
SM15_EA(dm)	0.000567419
SM10_AEA(dm)	-0.00301135
SM12_AEA(dm)	-0.0142587
SM13_AEA(dm)	0.0271065
SM14_AEA(dm)	0.0234467
SM15_AEA(dm)	0.00675432
SM02_AEA(ri)	0.0306766
SM05_AEA(ri)	0.00245476
Eig03_EA(ed)	-0.0071061
Eig04_EA(ed)	0.000230468
Eig07_EA(ed)	0.00206055
Eig10_EA(ed)	0.00284706
nCp	0.0260431
nCbH	0.00703042
nCb-	-0.0878837
nCconj	0.0198547
nN=C-N<	0.0444887
C-006	0.0122179
C-018	0.0195035
C-025	0.027115
C-026	0.00757409
C-027	-0.0332747
C-040	-0.0262237
C-041	0.00145909
H-046	0.000483214
SdCH2	-0.0252718
SdsCH	0.0267895
SsssCH	0.03106
SaasC	0.0462327
SssssC	0.0108091
SsNH2	-0.00426601
SaaN	-0.0130975
SaaNH	0.000554821
SsOH	-0.0145827
SdO	-0.00326616
SssO	-0.0119932
SsF	-0.00165719
NaasC	0.0358231
mindsCH	-0.00499281
minsNH2	0.0265298
minssNH	-0.00169012
minaaN	0.00125163
mintN	-0.0168405
minaaNH	0.0202043
mindO	0.00513485
minaaO	0.0115093
MaxdCH2	-0.00456384
MaxssssC	0.0160658
MaxsF	0.0140929
gmax	-0.0388662
CATS2D_07_DD	-0.0706223
CATS2D_03_DA	0.0359968
CATS2D_04_DA	0.000592734
CATS2D_05_DA	-0.00449373
CATS2D_06_DA	-0.0197823
CATS2D_09_DA	-0.0103342
CATS2D_03_DL	0.0046456
CATS2D_04_DL	-0.00797827
CATS2D_05_DL	-0.00394575
CATS2D_06_DL	-0.00500406
CATS2D_08_DL	-0.00484071
CATS2D_09_DL	0.0180249
CATS2D_02_AA	0.0120756
CATS2D_04_AA	-0.0357568
CATS2D_06_AA	0.000393335
CATS2D_09_AN	0.0350072
CATS2D_02_AL	0.00487984
CATS2D_03_AL	0.00575761
CATS2D_04_AL	-0.00637792
CATS2D_05_AL	0.00179014
CATS2D_06_AL	0.0106179
CATS2D_08_AL	0.0137058
CATS2D_09_AL	-0.000915736
CATS2D_03_NL	-0.0150346
CATS2D_08_NL	0.0120656
CATS2D_01_LL	-0.0173911
CATS2D_04_LL	-0.00562742
CATS2D_05_LL	0.0216549
CATS2D_06_LL	-0.0161455
CATS2D_07_LL	0.00207168
CATS2D_08_LL	0.0144582
SHED_DD	-0.00504587
SHED_AA	-0.00920122
SHED_AN	-0.0271028
SHED_AL	0.0158028
SHED_NL	-4.67533e-05
SHED_LL	-0.00162447
T(N..N)	-7.20431e-05
T(N..O)	-1.39376e-05
T(N..S)	-0.000300335
T(N..P)	-0.00237574
T(N..F)	0.00121737
T(N..Cl)	-0.00232901
T(N..Br)	-0.00147438
T(O..O)	6.90187e-05
T(O..S)	-0.00078308
T(O..P)	0.00429908
T(O..F)	-0.00119414
T(O..Cl)	0.000766333
T(O..Br)	-0.00163187
T(S..S)	0.00541806
T(S..F)	-0.00144
T(S..Cl)	-0.0114454
T(P..F)	-0.00602284
T(F..F)	-0.000814171
T(F..Cl)	-0.00115421
T(F..Br)	0.00122948
T(Cl..Cl)	0.000331844
B03[N-O]	-0.0114159
B03[N-S]	0.0410149
B04[N-N]	0.0170342
B07[C-N]	-0.00133679
B08[C-C]	-0.0447562
B09[N-N]	-0.0090347
B10[C-N]	0.0238076
F01[C-N]	-0.0173126
F01[N-N]	0.0754469
F02[C-N]	0.00576158
F02[C-O]	-0.00388652
F02[C-S]	0.00940211
F02[N-N]	-0.0140449
F02[N-O]	0.0141041
F02[F-F]	-0.000422053
F03[C-O]	0.0172414
F03[C-S]	0.000385494
F03[C-F]	0.00168091
F03[C-Cl]	-0.00147811
F04[C-C]	-0.00384724
F04[C-N]	-0.0125803
F04[C-O]	0.00830648
F04[C-F]	0.00531706
F04[N-N]	-0.00829659
F04[N-O]	-0.00557755
F04[N-F]	-0.046126
F04[O-O]	0.0026427
F05[C-C]	0.00505811
F05[C-N]	-0.0136537
F05[C-O]	-0.000519166
F05[C-S]	-0.0311578
F05[C-F]	-0.00703128
F05[N-N]	-0.0763282
F05[N-O]	0.0183813
F05[N-F]	-0.0469619
F05[N-Cl]	-0.00224845
F05[O-S]	-0.0222537
F06[C-C]	-0.00968522
F06[C-N]	0.00735554
F06[C-O]	0.00367229
F06[C-S]	0.0144813
F06[C-Cl]	0.00153391
F06[N-S]	-0.0330421
F07[C-N]	0.00645752
F07[C-O]	-0.00484617
F07[N-O]	-0.00853799
F07[O-O]	0.0159495
F08[C-C]	-0.0117247
F08[C-N]	-0.00365733
F08[C-O]	0.00085122
F08[N-O]	-0.0155666
F08[O-F]	0.0100651
F09[C-C]	0.00601431
F09[C-N]	0.00907641
F09[C-O]	-0.0073721
F09[N-F]	-0.00135377
F09[O-O]	0.00266638
F10[C-N]	-0.000667238
F10[C-O]	0.010576
F10[C-F]	0.00520524
F10[C-Cl]	0.0317617
F10[N-N]	0.0206615
F10[N-O]	0.00623312
MR99	-0.000870141
MRcons	-7.92404e-20
TPSA(NO)	1.42007e-05
TPSA(Tot)	1.24448e-05
LOGP99	0.0221544
SAacc	-0.000782838
SAdon	0.00245342
Vx	-4.26595e-05
MDEC-34	-0.00606508
nLevel3	-0.0219833
nLevel5	-0.0109246
nLevel7	0.00118548
nLevel10	-0.00743752
phLevel3	0.0149219
arLevel3	-0.0137525
s3_size	0.00791982
s4_size	0.00149047
s2_pathLength	0.00590711
s4_numSharedNeighbors	0.00174215
s2_numAroBonds	-0.0252421
s3_numAroBonds	-0.016266
s4_numAroBonds	-0.00580927
s34_size	0.011161
chiralMoment	-0.00175456

## Sheet: 7. Anti-IL-1beta
Descriptors	coef
max_conj_path	0.00325253
D/Dtr03	-0.000368559
D/Dtr04	0.000386025
D/Dtr05	0.00056213
D/Dtr07	-0.00106746
D/Dtr08	-0.000555475
D/Dtr09	-0.000236017
D/Dtr10	-0.000102111
D/Dtr11	-7.98233e-05
D/Dtr12	-0.000847686
ZM1V	-0.000183237
ZM1Kup	-0.000111558
ZM1Mad	-0.00193223
ZM1Per	-0.000214751
ZM2V	-0.00174872
ZM2Kup	-0.00177308
ZM2Per	0.00144305
ZM2MulPer	-0.00114271
ECC	0.00043616
MDDD	0.0143348
CENT	-5.30374e-06
VAR	-0.00155984
SMTI	2.75093e-05
SMTIV	-1.27537e-05
GMTI	1.89194e-05
GMTIV	-1.50144e-05
CSI	3.36302e-06
Wap	-2.03904e-06
DELS	2.36838e-05
TIE	-0.00133441
BAC	0.00292071
ISIZ	0.00116801
IDET	3.60565e-05
IDMT	6.31661e-06
TIC1	-0.00246523
TIC2	-0.000275921
TIC3	0.00296345
Wi_D	-1.01765e-05
SpAD_D	0.00018986
QW_L	-7.99207e-06
J_X	-0.00192808
Wi_Dt	-0.000108129
AVS_Dt	0.0047021
SpMax_Dt	5.67062e-05
SpDiam_Dt	-0.0012347
SpAD_Dt	0.000294471
Wi_D/Dt	0.00131091
H_D/Dt	1.85094e-05
Wi_Dz(Z)	-7.11531e-06
SpDiam_Dz(Z)	-0.000983781
SpAD_Dz(Z)	4.07588e-06
Wi_Dz(m)	3.95664e-05
SpDiam_Dz(m)	-0.000707061
Wi_Dz(v)	0.000123247
AVS_Dz(v)	-0.00108504
Wi_Dz(e)	-6.59371e-05
SpDiam_Dz(e)	-0.00020989
Wi_Dz(p)	0.000164425
AVS_Dz(p)	-0.00110206
SpDiam_Dz(p)	-2.04158e-05
Wi_Dz(i)	-0.000169487
ATSC3m	-0.000173929
ATSC5m	0.000897157
ATSC8m	0.00376717
P_VSA_LogP_1	-0.000861362
P_VSA_LogP_2	-0.000705652
P_VSA_LogP_3	-0.00183246
P_VSA_LogP_4	-0.00214179
P_VSA_LogP_5	0.00402568
P_VSA_LogP_7	0.000713864
P_VSA_LogP_8	0.00217356
P_VSA_MR_1	-0.000734575
P_VSA_MR_2	-0.00103332
P_VSA_MR_5	-0.00436434
P_VSA_MR_7	0.0026193
P_VSA_MR_8	-0.000531948
P_VSA_m_1	-0.000896458
P_VSA_m_2	-0.00392421
P_VSA_v_3	0.00236141
P_VSA_e_2	-0.00233455
P_VSA_e_3	0.000775306
P_VSA_p_3	0.00176196
P_VSA_i_2	0.00335644
P_VSA_s_2	-0.000368599
P_VSA_s_4	0.00118522
P_VSA_s_6	-0.00611969
P_VSA_ppp_P	0.0043072
P_VSA_ppp_con	0.000264458
P_VSA_ppp_hal	0.00192105
P_VSA_ppp_cyc	0.00198235
P_VSA_ppp_ter	0.000489323
P_VSA_charge_3	0.00460512
P_VSA_charge_4	0.00195348
P_VSA_charge_5	-0.000747809
P_VSA_charge_7	-0.000693915
P_VSA_charge_9	-0.000279294
P_VSA_charge_11	-0.000184566
Chi0_EA(dm)	-0.00171515
SM14_EA(dm)	-0.000784784
H-046	0.0047084
H-051	-0.00516017
SaaN	-0.00319095
SssO	-0.00330259
SaaO	0.00313239
minssNH	-0.000294259
mindO	-0.0068233
MaxsOH	0.0129045
MaxssO	0.00587556
MaxsF	0.00600566
gmax	0.0156604
CATS2D_06_DA	-0.0100929
CATS2D_05_DL	-0.000514784
CATS2D_03_AL	0.014463
CATS2D_07_AL	-0.00182294
CATS2D_09_AL	-0.00634394
CATS2D_03_LL	0.00202667
CATS2D_05_LL	0.00325334
CATS2D_07_LL	-0.0045353
SHED_AA	0.00123495
SHED_LL	0.0145778
T(N..N)	0.000133137
T(N..O)	-0.00192866
T(N..S)	-0.00231219
T(N..F)	0.000975316
T(N..Cl)	0.00219708
T(N..Br)	0.000518936
T(O..O)	-2.16194e-05
T(O..S)	-0.00119939
T(O..F)	-0.000597214
T(O..Cl)	0.000734431
T(O..Br)	-0.00581235
T(S..F)	-0.0036673
T(F..Cl)	0.00617244
T(Cl..Cl)	-0.00508667
F03[C-C]	0.00971647
F04[C-C]	0.000831919
F04[C-N]	-0.00367836
F04[C-O]	0.00230859
F06[C-O]	-0.0194701
F07[C-O]	-0.00779378
F09[C-C]	0.00285485
F09[C-O]	0.0067686
F10[C-C]	-0.00691079
F10[C-N]	-0.000427638
MR99	0.00591649
MRcons	7.97607e-19
TPSA(Tot)	0.00753382
SAtot	-0.00034176
SAacc	0.00859038
SAdon	-0.00184059
Vx	-0.000832422
s3_pathLength	-0.0128687
s4_pathLength	0.0061395
s2_numAroBonds	0.00451556
s3_numAroBonds	6.14003e-05
s4_numAroBonds	-0.00691474
chiralPhMoment	-0.00357555

## Sheet: 8. Anti-TNF-alpha
Descriptors	coef
MW	0.00152229
AMW	-0.00476473
Si	-0.00172779
nAA	-0.00268345
RBN	-0.000230978
H%	-0.00461604
X%	0.00046629
max_conj_path	0.00662918
Rperim	-0.0054507
D/Dtr03	-0.0006986
D/Dtr04	-0.000216394
D/Dtr05	-0.000593405
D/Dtr06	-0.000549914
D/Dtr07	-8.12958e-05
D/Dtr08	-0.000290165
D/Dtr09	-1.25583e-05
D/Dtr10	5.74938e-05
D/Dtr12	0.000566542
Pol	0.00594705
LPRS	0.00101915
ECC	0.000115257
MDDD	-0.00220466
UNIP	0.000994013
CENT	1.17358e-06
VAR	0.000229838
MaxTD	-0.0129192
Wap	-2.35283e-09
S3K	-0.00149276
MAXDN	-0.0056498
MAXDP	0.00102605
DELS	-7.11912e-05
BAC	-0.0014215
SRW09	-0.00320955
piPC07	-0.0120006
piPC10	0.0199938
ISIZ	0.000706345
IDET	5.45575e-06
TIC0	-0.000665339
TIC1	0.000447602
TIC2	0.000111102
TIC3	-0.000400061
TIC4	1.30497e-06
TIC5	-0.000669591
J_A	0.00085167
Wi_D	1.31481e-06
AVS_D	-0.000224874
H_D	-3.89695e-05
SpPos_D	-6.36606e-05
SpMax_D	3.82247e-05
SpDiam_D	6.40266e-05
SpAD_D	-6.87864e-05
SM6_D	-0.00387999
QW_L	2.64028e-06
TI2_L	0.00418059
SpAD_L	-9.49811e-08
J_X	2.07518e-05
J_H2	-0.00155628
Wi_Dt	4.10782e-06
AVS_Dt	-0.000256041
H_Dt	0.00121804
J_Dt	0.00970981
SpPos_Dt	-0.000467489
SpMax_Dt	0.000135088
SpDiam_Dt	-1.31039e-05
SpAD_Dt	-6.371e-05
SpMAD_Dt	0.00716061
Ho_Dt	-0.00725512
SM6_Dt	-1.85015e-05
Wi_D/Dt	0.00018041
H_D/Dt	5.18005e-05
J_D/Dt	-0.00718821
SpPos_D/Dt	-0.00258412
SpMax_D/Dt	-0.000960596
SpDiam_D/Dt	-0.00948286
SpAD_D/Dt	-0.000137212
Wi_Dz(Z)	1.28386e-07
AVS_Dz(Z)	-7.7442e-05
H_Dz(Z)	0.00032154
SpAbs_Dz(Z)	-8.25642e-05
SpMax_Dz(Z)	4.34051e-05
SpDiam_Dz(Z)	-5.86051e-05
SpAD_Dz(Z)	1.07797e-05
Wi_Dz(m)	1.20091e-06
AVS_Dz(m)	-7.59139e-05
H_Dz(m)	0.000339964
SpAbs_Dz(m)	-8.79465e-05
SpMax_Dz(m)	4.56537e-05
SpDiam_Dz(m)	-5.85548e-05
SpAD_Dz(m)	1.03785e-05
Wi_Dz(p)	1.15656e-06
AVS_Dz(p)	0.000427152
H_Dz(p)	-0.00105621
SpAbs_Dz(p)	6.86802e-05
SpMax_Dz(p)	5.66796e-05
SpDiam_Dz(p)	7.29227e-05
SpAD_Dz(p)	-7.65754e-05
SpMAD_Dz(p)	0.000740243
Wi_Dz(i)	-5.41179e-06
AVS_Dz(i)	-1.7389e-05
H_Dz(i)	0.000470021
SpAbs_Dz(i)	-0.000102594
SpMax_Dz(i)	5.33536e-05
SpDiam_Dz(i)	-0.000100658
SpAD_Dz(i)	3.7572e-05
Wi_B(m)	0.0036366
J_B(m)	-2.25746e-05
SpAD_B(m)	0.000277175
Wi_B(i)	2.92217e-05
J_B(i)	-0.000116245
SpAD_B(i)	1.19474e-06
ATS8m	0.0105215
ATSC1m	-0.00098158
ATSC2m	-0.00193224
ATSC3m	-0.000521767
ATSC4m	-0.00102762
ATSC5m	-0.000108298
ATSC6m	-0.00137176
ATSC7m	0.00201819
ATSC8m	-0.00336041
ATSC4p	-0.00010135
P_VSA_LogP_1	0.00111463
P_VSA_LogP_2	-0.000353252
P_VSA_LogP_3	-0.000617545
P_VSA_LogP_4	-0.00105152
P_VSA_LogP_5	-0.000423054
P_VSA_LogP_6	-0.000196669
P_VSA_LogP_7	0.000345966
P_VSA_LogP_8	-0.000145733
P_VSA_MR_1	0.000191315
P_VSA_MR_2	-0.000664013
P_VSA_MR_3	-0.000514942
P_VSA_MR_5	0.000732083
P_VSA_MR_6	-0.000916126
P_VSA_MR_7	0.00193993
P_VSA_MR_8	0.00085081
P_VSA_m_1	-0.000169237
P_VSA_m_2	0.00017806
P_VSA_m_3	0.00103406
P_VSA_m_4	-0.00327464
P_VSA_m_5	0.000544466
P_VSA_v_1	-0.000420805
P_VSA_v_2	5.89851e-05
P_VSA_e_1	-0.000209636
P_VSA_e_2	0.00181955
P_VSA_e_3	-0.000147594
P_VSA_e_5	0.000121168
P_VSA_p_1	-0.00020988
P_VSA_p_4	-0.00062404
P_VSA_i_1	-5.02246e-05
P_VSA_i_3	-2.81463e-05
P_VSA_i_4	-0.000381786
P_VSA_s_1	-0.00308829
P_VSA_s_2	0.000876859
P_VSA_s_3	-0.00200844
P_VSA_s_4	-0.00194822
P_VSA_s_5	-0.00143707
P_VSA_s_6	0.00062789
P_VSA_ppp_L	9.75321e-06
P_VSA_ppp_P	-0.00202096
P_VSA_ppp_N	-6.39236e-06
P_VSA_ppp_D	7.03948e-05
P_VSA_ppp_A	-0.00209237
P_VSA_ppp_ar	-6.01303e-05
P_VSA_ppp_con	0.000615238
P_VSA_ppp_cyc	0.00176573
P_VSA_ppp_ter	0.000185335
P_VSA_charge_1	5.66932e-05
P_VSA_charge_2	0.00253948
P_VSA_charge_3	0.00136334
P_VSA_charge_4	0.00202332
P_VSA_charge_5	0.000663257
P_VSA_charge_7	-0.000450508
P_VSA_charge_8	0.000631408
P_VSA_charge_9	0.000300225
P_VSA_charge_10	0.00204887
P_VSA_charge_11	0.000224693
P_VSA_charge_12	0.000492561
P_VSA_charge_13	-0.000333915
Eta_epsi	0.000495674
Eta_C	0.000393274
Eta_R	-0.00077876
Eta_F	-0.000469784
nCrs	0.0161337
nCbH	-0.00432134
nImidazoles	-0.00502285
nPyridines	0.0683929
nPyridazines	-0.0354608
nPyrimidines	0.0374425
C-008	0.00223626
C-040	-0.0323751
H-046	-0.0104693
H-053	0.00630754
SsCH3	0.00100524
SdsCH	-0.012608
SaaCH	-0.00422515
SsssCH	-0.0172024
StsC	0.0412017
SaasC	0.0161435
SsOH	-0.00581285
SssO	-0.00422071
SsF	0.00273996
NaasC	-0.0210967
minsCH3	0.00147856
minsssCH	-0.00320471
minssssC	0.0173407
minssNH	-0.00722303
minsssN	-0.00600871
mindsN	0.00176447
minaaN	-0.00103979
mintN	0.00336157
mindO	0.00257116
minaaO	0.00317277
minsF	-0.00192838
minsCl	0.00660052
MaxtN	0.00138645
MaxsOH	0.00515812
CATS2D_02_DA	-0.0177744
CATS2D_03_DA	0.00742401
CATS2D_04_DA	0.000992409
CATS2D_06_DA	-0.00920862
CATS2D_07_DA	-0.00119696
CATS2D_04_DL	-0.00186801
CATS2D_05_DL	0.00983219
CATS2D_06_DL	0.00611345
CATS2D_07_DL	-0.00324835
CATS2D_09_DL	0.00862514
CATS2D_03_AA	-0.00767539
CATS2D_04_AA	-0.00619811
CATS2D_05_AA	-0.0021477
CATS2D_05_AP	0.0118953
CATS2D_02_AL	-0.0100743
CATS2D_04_AL	0.00780837
CATS2D_06_AL	-0.00294761
CATS2D_08_AL	0.00413459
CATS2D_09_AL	0.00665525
CATS2D_02_PL	0.0154908
CATS2D_03_PL	0.00834001
CATS2D_05_PL	-0.00209802
CATS2D_04_NL	-0.00472874
CATS2D_05_NL	-0.000710765
CATS2D_01_LL	-0.0104958
CATS2D_02_LL	-0.00384795
CATS2D_03_LL	-0.00599586
CATS2D_04_LL	-0.00226006
CATS2D_05_LL	-0.0051496
CATS2D_06_LL	0.00332855
CATS2D_08_LL	0.0161842
SHED_DD	0.00286114
SHED_DA	-0.00285375
SHED_DL	0.0105755
SHED_AA	0.00977331
SHED_AL	0.0126229
SHED_NL	-0.00465829
SHED_LL	0.00286726
T(N..N)	-0.000187569
T(N..O)	-3.68375e-05
T(N..S)	-0.00117256
T(N..F)	-0.00115736
T(N..Cl)	-0.000685253
T(O..O)	9.42077e-05
T(O..S)	-0.00014716
T(O..F)	0.000245141
T(O..Cl)	-0.000572588
T(O..Br)	-0.00250262
T(S..S)	0.00226239
T(S..F)	0.00441995
T(S..Cl)	0.00510373
T(S..Br)	0.00226046
T(F..F)	-0.0010592
T(F..Cl)	-0.00148499
T(Cl..Cl)	-0.00139796
B02[N-S]	-0.0102614
B03[N-S]	-0.03428
B07[O-S]	0.00720364
B08[C-N]	0.0279284
B10[C-C]	0.00419935
F01[C-N]	-0.0140053
F01[C-S]	0.0183852
F01[N-N]	0.0138593
F02[C-C]	0.0138362
F02[C-S]	0.00382912
F02[N-S]	-0.000659535
F03[C-C]	0.00285957
F03[C-N]	-0.000719709
F03[C-O]	0.00123083
F03[C-S]	-0.00029319
F03[C-F]	-0.0266208
F03[C-Cl]	-0.0141567
F03[N-O]	0.000282421
F03[N-Cl]	0.0107031
F03[O-O]	-0.00793275
F04[C-C]	0.00358419
F04[C-O]	-0.0100295
F04[C-S]	0.000294683
F04[N-N]	0.0209087
F04[N-O]	-0.00260343
F04[O-S]	-0.0225497
F05[C-N]	-0.00787272
F05[C-O]	0.00205969
F05[C-F]	-0.0137094
F05[C-Cl]	0.00763059
F05[N-F]	0.00567342
F05[O-O]	0.00651556
F05[O-S]	-0.000394553
F05[O-F]	-0.00796363
F06[C-C]	-0.00224842
F06[C-N]	-0.00192584
F06[C-O]	-0.00356402
F06[C-F]	0.0071073
F06[N-O]	-0.0114381
F06[O-O]	-0.00271667
F07[C-C]	-0.00439586
F07[C-N]	0.00830945
F07[C-O]	0.00354379
F08[C-C]	-0.00531661
F08[C-N]	-0.00052375
F08[C-O]	0.00439604
F08[N-N]	0.00173234
F08[N-F]	-0.0055258
F08[O-Cl]	0.0472484
F09[C-C]	-0.00357849
F09[C-O]	-0.00707858
F09[C-F]	0.00535497
F09[C-Cl]	0.0166419
F10[C-C]	-0.00156841
F10[C-N]	-0.000131678
F10[C-F]	0.010026
MR99	0.00367142
MRcons	1.23121e-17
TPSA(NO)	-0.000664257
TPSA(Tot)	0.000431341
LOGP99	-0.00193441
SAacc	0.000141712
SAdon	0.00117174
Vx	-0.000316816
MDEC-11	0.00150878
MDEC-34	-0.0061363
MDEO-12	-0.000211466
ChiralCenter	-0.00247303
nLevel4	0.00031369
nLevel8	-0.0128438
arLevel2	0.0173463
s2_size	-0.023603
s4_numSharedNeighbors	0.00991192
s4_numRotBonds	0.00143576
s3_numAroBonds	-0.0157249
s4_numAroBonds	-0.00390082
s34_size	0.00423451
chiralPhMoment	-0.000894297

## Sheet: 9. Anti-CAL 27
Descriptors	coef
D/Dtr05	0.000514191
D/Dtr06	0.000191785
D/Dtr08	-0.00047413
D/Dtr09	-0.000522017
D/Dtr10	-5.60478e-05
D/Dtr12	-0.00200482
ZM1V	-0.000632563
ZM1Kup	0.00114055
ZM1Per	-0.00101335
ZM1MulPer	-0.000975958
ZM2	0.00486891
ZM2Kup	0.00399792
ZM2Mad	-0.00406093
ZM2Per	-0.000744782
ZM2MulPer	-0.0010766
UNIP	-0.00143713
CENT	3.66488e-05
VAR	0.000171819
SMTI	-2.61697e-05
SMTIV	1.44488e-05
GMTI	-2.68156e-05
GMTIV	1.14409e-05
Wap	3.93851e-07
DELS	0.00180851
BAC	0.00296622
ISIZ	-0.00309308
IDET	-0.000186345
IDMT	-2.32686e-06
Uindex	-0.00270386
TIC0	0.000986107
TIC1	-0.00482792
TIC3	0.0040745
TIC4	-0.00239796
TIC5	-0.00212777
Wi_D	8.63384e-05
SpPos_D	0.000467231
SpDiam_D	0.00215752
QW_L	-0.000209136
TI1_L	-0.000572576
J_X	-4.9855e-05
Wi_Dt	-2.89623e-05
AVS_Dt	0.00274691
SpDiam_Dt	7.92547e-05
SpAD_Dt	-6.41058e-05
H_D/Dt	-5.14132e-05
Wi_Dz(Z)	-0.000103237
SpAbs_Dz(Z)	0.000358603
SpAD_Dz(Z)	4.2267e-06
Wi_Dz(m)	-1.81771e-05
SpAbs_Dz(m)	0.000316017
SpAD_Dz(m)	1.26826e-06
Wi_Dz(v)	-3.86699e-07
H_Dz(v)	0.0016592
SpDiam_Dz(v)	-0.000575038
Wi_Dz(e)	7.48573e-05
SpAbs_Dz(e)	0.000621371
SpAD_Dz(e)	3.29357e-05
Wi_Dz(p)	-8.82298e-05
H_Dz(p)	0.000733801
SpDiam_Dz(p)	-0.00178292
SpAD_Dz(p)	9.49531e-05
Wi_Dz(i)	0.000212751
SpAbs_Dz(i)	0.000839853
SpAD_Dz(i)	3.86286e-05
ATSC3m	0.00737998
ATSC7m	-0.00895212
ATSC7v	-0.00593084
P_VSA_LogP_1	0.00196535
P_VSA_LogP_3	-0.00110805
P_VSA_LogP_4	-0.00190397
P_VSA_LogP_7	0.000730815
P_VSA_LogP_8	0.00646381
P_VSA_MR_1	0.00355738
P_VSA_MR_2	-0.000265038
P_VSA_MR_3	0.00407722
P_VSA_MR_5	0.00340301
P_VSA_MR_7	-0.00246503
P_VSA_m_3	0.00128028
P_VSA_v_2	0.000369273
P_VSA_v_3	-0.00126963
P_VSA_v_4	0.00198744
P_VSA_e_2	0.00308286
P_VSA_e_5	0.000460047
P_VSA_p_2	0.000160186
P_VSA_p_3	-0.0018104
P_VSA_i_1	0.000702251
P_VSA_s_5	0.00398945
P_VSA_ppp_D	0.00269798
P_VSA_ppp_A	-0.00187017
P_VSA_ppp_ar	0.00395519
P_VSA_ppp_con	0.000203891
P_VSA_ppp_cyc	-0.00175533
P_VSA_charge_1	-0.00191736
P_VSA_charge_2	0.0006186
P_VSA_charge_3	0.00231355
P_VSA_charge_5	0.00242868
P_VSA_charge_6	-0.000208513
P_VSA_charge_7	-0.00173406
P_VSA_charge_9	0.000455961
H-046	0.00376185
CATS2D_03_LL	-0.00702664
CATS2D_04_LL	-0.00547064
CATS2D_07_LL	0.0168551
SHED_DA	0.0144395
T(N..N)	-0.000161487
T(N..O)	0.00113658
T(N..F)	-0.00198753
T(N..Cl)	0.00216412
T(O..O)	-0.000411808
T(O..S)	-0.0019453
T(O..F)	0.000229271
T(F..F)	-0.0168739
F05[C-O]	0.00265668
SAacc	1.81232e-06
Vx	-0.000102118
VvdwZAZ	-2.57853e-06
chiralMoment	0.00710168

## Sheet: 1. Toxicology
cid	Probability of nontox
5273008	0.181644
5273004	0.198203
250899	0.203479
15926747	0.207072
9882903	0.207072
354624	0.207072
13989334	0.209321
13989335	0.209321
492197	0.21189
6483433	0.215533
516053	0.219322
3034808	0.224004
14485373	0.224004
470067	0.22448
12777818	0.224815
87824027	0.225394
296233	0.225394
21147181	0.228426
24867261	0.228426
14330066	0.238835
14330067	0.238835
53791036	0.240896
92132405	0.241071
69626224	0.241071
11778706	0.241071
10040688	0.241261
77844687	0.241261
492559	0.242922
12777820	0.247487
492201	0.250043
14803115	0.252416
14803116	0.252416
5487206	0.257013
492117	0.258625
492116	0.258625
13989343	0.260788
162354766	0.263569
15172869	0.2646
3009936	0.269213
90487625	0.269544
11551453	0.271994
9965654	0.277084
14284094	0.282173
511719	0.282717
21140106	0.282779
15573114	0.285012
9879442	0.285012
15573115	0.285012
44398142	0.285012
40488632	0.285012
8974	0.285012
44629847	0.285012
11957496	0.285012
6603778	0.285012
504745	0.291944
71775556	0.292333
124201	0.293693
493452	0.293986
287709	0.297555
22791353	0.297697
128924	0.298537
92132157	0.299434
73265308	0.299434
147569	0.299434
6602111	0.299434
90488943	0.299434
13009312	0.299434
265574	0.299618
24906265	0.299618
10085225	0.299618
92236137	0.299618
92236135	0.299618
16760678	0.299618
131846804	0.299618
154726303	0.299892
493454	0.300593
197610	0.302507
10517505	0.302507
9973143	0.305869
56977943	0.306384
100938413	0.309774
14018661	0.30996
13989345	0.311721
470065	0.31196
44626655	0.313426
21140467	0.315924
512717	0.317893
121486905	0.318323
512127	0.321107
71305626	0.321107
46874399	0.321107
45038620	0.321107
92233558	0.321107
10039594	0.322079
492200	0.325933
121486895	0.326328
3010354	0.329609
125496047	0.329949
21139599	0.330015
7173845	0.334989
102197	0.334989
46874491	0.334989
45358303	0.334989
44629881	0.334989
45357254	0.334989
21797130	0.334989
3012227	0.337637
464373	0.338039
3061100	0.33858
50989994	0.33858
492561	0.343953
21815879	0.345448
3007217	0.349975
21116879	0.350605
7065210	0.350605
93003	0.350605
44629860	0.350605
11098172	0.3533
350834	0.353952
6481604	0.354255
10565387	0.354511
10946143	0.354928
126968624	0.354943
21854299	0.354943
130712	0.355891
57346774	0.356336
6478491	0.356426
456109	0.358797
10517504	0.359973
10380149	0.360532
121486870	0.361367
584362	0.363996
10686845	0.365859
72212339	0.366376
11162398	0.368305
10934996	0.368682
92132092	0.368682
334830	0.368682
512555	0.370087
71431122	0.371324
126969176	0.371324
131887892	0.372113
131880518	0.372669
66524133	0.3732
163285340	0.373811
71314761	0.374547
469442	0.376477
466018	0.376511
54101611	0.377275
10220985	0.377275
6441200	0.377275
14803093	0.377275
118989478	0.377275
54101612	0.377275
129653012	0.377481
94480465	0.379017
9882803	0.379017
10471224	0.381929
72201	0.383034
14485380	0.383034
100327	0.383371
324309	0.383371
5273014	0.384665
13072932	0.386549
40468020	0.386549
68197667	0.386549
42553747	0.386549
54669720	0.386549
16129586	0.386549
53869019	0.386549
3367	0.386549
13072931	0.386549
8975	0.386549
44629914	0.386549
154716223	0.386549
46705411	0.386549
45039261	0.386549
503813	0.386846
131881042	0.389344
470053	0.390133
10946114	0.390469
134229959	0.390491
7043952	0.391535
6595184	0.391535
355280	0.391768
121487874	0.392346
128771	0.392692
15926748	0.393459
15926749	0.393459
71341063	0.394348
10356486	0.394348
10265867	0.394348
67785972	0.394348
481530	0.395175
121487869	0.395368
511720	0.398661
11808175	0.399292
98140	0.399292
11832914	0.399292
482505	0.399292
11087275	0.399292
504751	0.399625
92236361	0.40014
490627	0.402282
512128	0.402615
94001662	0.402941
91810866	0.402941
13108018	0.402941
24206417	0.402941
134695307	0.402941
1268279	0.402941
5327118	0.402941
13463	0.402941
131852786	0.404712
53908939	0.404966
6479249	0.405917
131858702	0.406423
484807	0.406566
472636	0.406831
260138	0.407578
121217040	0.407578
126916	0.407859
490444	0.410332
512679	0.410639
273017	0.410927
21121551	0.411821
15450711	0.411965
57216635	0.411965
163199084	0.411965
160751	0.411965
138114911	0.412878
6483431	0.412878
11243974	0.415106
12907243	0.415326
47751	0.415326
134714751	0.415326
1265902	0.415326
44629846	0.415326
45357134	0.415326
121487870	0.415419
13989347	0.416181
57368267	0.416181
464374	0.416707
7458588	0.417049
7058183	0.417049
22861745	0.417106
490440	0.41722
9925859	0.417492
102381544	0.417767
68742335	0.418629
11173824	0.419396
92237060	0.41952
97453	0.41952
5494430	0.419769
393545	0.419792
69527463	0.420174
504749	0.421267
92301827	0.42233
6482628	0.42233
49784135	0.422824
472638	0.423305
472656	0.423305
10588022	0.423513
10588021	0.423513
3011898	0.424223
469441	0.425351
21821295	0.42626
3012586	0.426426
121486770	0.42657
131883271	0.426603
57116127	0.426832
6976932	0.426832
27556867	0.426832
15607330	0.426832
100551	0.42789
466022	0.428607
10850803	0.430838
12939902	0.431541
12939901	0.431541
2777912	0.431541
44283163	0.431541
46783463	0.431541
96544	0.431541
10521478	0.431541
7070208	0.431541
688019	0.431541
90673794	0.431705
299952	0.432618
481082	0.433504
10108316	0.433625
6480510	0.433717
490628	0.433761
196788	0.433822
87824325	0.434172
5272658	0.434289
5273749	0.436044
5271377	0.436044
3009937	0.436197
5271782	0.437426
73351959	0.438876
155889717	0.439094
154706402	0.439094
5272659	0.439375
76973629	0.439445
92021270	0.439606
44633776	0.439606
3007216	0.440722
472657	0.441283
472639	0.441283
162653200	0.44163
447199	0.441638
10831407	0.441938
131858477	0.442092
131875471	0.442576
91150325	0.442711
6913230	0.442798
3363163	0.442798
503811	0.443066
459942	0.443433
247678	0.444122
10265835	0.444411
11119839	0.444457
87150598	0.444737
70610597	0.444938
643968	0.444938
5702211	0.444938
13071731	0.444938
43834572	0.444938
853012	0.444938
450214	0.444938
9881867	0.445243
10716626	0.445748
154701264	0.446109
14237950	0.446265
6426626	0.446265
23757287	0.44633
92262645	0.446357
131858479	0.446357
160418	0.446594
23518344	0.44695
118796809	0.447338
128557	0.447921
88101259	0.448368
452091	0.449131
58478862	0.449131
9971101	0.449131
472655	0.449555
49791785	0.449555
472632	0.449555
9994200	0.449672
22316435	0.449672
15677395	0.449672
76974063	0.450003
92228414	0.450829
11824	0.450829
512290	0.450829
247955	0.450829
73353418	0.451538
70587122	0.451705
54571321	0.451906
129009617	0.452682
451908	0.453529
76973399	0.454263
11779021	0.45476
490621	0.455172
490623	0.455172
131881813	0.455392
194101	0.456361
73442717	0.456821
92230799	0.456821
494271	0.457297
89858725	0.457299
447864	0.457625
69626062	0.457625
489877	0.457954
1468	0.45813
131708761	0.458504
10446782	0.459505
310052	0.459567
15612856	0.459567
5272657	0.459585
9948218	0.45982
71832128	0.460512
42553032	0.460512
42553033	0.460512
3011901	0.460676
6450904	0.460697
50989698	0.460697
360644	0.461831
21592214	0.462321
481083	0.462386
481081	0.462386
484808	0.462812
469861	0.46291
6479208	0.463281
101670692	0.463326
131880742	0.463872
15410716	0.46393
512680	0.464035
72501	0.464694
121487433	0.464965
3011924	0.466927
21829243	0.467247
14410899	0.467333
512286	0.467342
516040	0.467403
395997	0.468498
457015	0.468697
10067373	0.469512
10469813	0.469571
11737492	0.469886
161470	0.469969
455227	0.470077
92236337	0.470788
3006170	0.470788
92271256	0.471037
10357410	0.471064
10660621	0.471491
3011899	0.471527
14630157	0.47251
131853716	0.472532
6475236	0.473428
472814	0.473428
490625	0.473435
504747	0.473821
23545530	0.474044
44400589	0.47418
71262374	0.47418
5273019	0.474522
72212335	0.474727
14159235	0.474727
121486876	0.476194
387981	0.476453
10266777	0.476453
21157833	0.476663
454925	0.476798
93476651	0.477607
10019125	0.477607
3011897	0.477729
513632	0.477968
23616027	0.47803
44330586	0.47803
92209904	0.47803
21776949	0.47803
6245	0.47803
3007918	0.47803
92209902	0.47803
92846012	0.47803
9862222	0.478077
121578	0.478268
131855105	0.478511
131881061	0.478532
3067878	0.478558
513636	0.478611
9796412	0.478625
13566110	0.479093
42552658	0.4792
42552656	0.4792
11277569	0.479329
13922191	0.479883
29978508	0.479883
117810735	0.479883
92977577	0.479883
13922189	0.479883
9871558	0.479883
10859911	0.480178
97186	0.480603
46875292	0.480603
9881866	0.48093
280444	0.48093
189898	0.480972
167821	0.481161
44629858	0.481174
7048664	0.481174
124507746	0.481174
133688189	0.481174
688477	0.481174
17571993	0.481174
136260503	0.481267
11758878	0.481817
6482630	0.481915
193188	0.482078
490353	0.482179
491674	0.48267
72194	0.48267
359064	0.48267
92151285	0.48267
511670	0.483111
121487512	0.483111
86751195	0.483135
131708567	0.483249
131885779	0.483249
90472229	0.483412
451602	0.483604
134693115	0.483604
14312484	0.483604
5278282	0.484008
473280	0.484446
16760387	0.484581
16212026	0.484581
6175	0.484581
102602088	0.484581
121486971	0.484581
6603781	0.484581
121487027	0.484581
121487034	0.484581
160696	0.484581
12358851	0.484581
131701110	0.484581
6713582	0.484581
24729357	0.484581
5702244	0.484581
91142034	0.484581
596	0.484581
102601364	0.484581
67709179	0.484662
150851	0.484674
21122961	0.484674
29933626	0.484674
40544496	0.484674
44629873	0.484674
92268334	0.484674
3007908	0.484674
45358309	0.484674
3080719	0.485161
5273524	0.485161
175228	0.485224
21721736	0.486365
3083166	0.487074
6451079	0.488164
472637	0.488192
6480471	0.488307
76974604	0.488555
44396095	0.488778
21140838	0.488896
14806063	0.489009
196710	0.489009
6454537	0.489333
54192124	0.489333
121012732	0.489488
124528040	0.48949
21852781	0.490158
512658	0.490266
506143	0.490304
72968	0.490304
54069128	0.490332
91884695	0.490713
92043448	0.490713
65031	0.490713
76973301	0.490902
333691	0.490925
54041813	0.490925
21141083	0.491281
21732848	0.491601
22867782	0.491734
14702157	0.49211
473083	0.492203
71539312	0.492255
6483432	0.492336
15612862	0.49245
391266	0.493014
496474	0.493014
121427567	0.493278
11054511	0.493278
46705350	0.493278
13922196	0.493278
3461	0.493278
6093357	0.493278
45357852	0.493425
29924995	0.493425
490511	0.493506
6452137	0.493774
54260440	0.494208
71414969	0.494604
53322921	0.494752
9993207	0.49479
154701265	0.495706
326808	0.495839
44329981	0.495839
125507539	0.496216
353671	0.496431
131884918	0.496496
67841326	0.496546
67841222	0.496546
92253393	0.496623
92253390	0.496623
125124867	0.496623
14608008	0.496623
3007223	0.496673
135524757	0.496725
121487038	0.498898
100935585	0.498898
11749237	0.498953
510999	0.499553
136238397	0.499618
516072	0.500506
126915	0.500888
131858473	0.500936
11501773	0.50097
5272753	0.501607
3007224	0.501749
92258444	0.501875
10828395	0.501875
121487333	0.502301
92243788	0.502301
59048458	0.502615
469447	0.503142
92243924	0.503807
21144466	0.503807
121486913	0.503999
134694066	0.504224
29982328	0.504224
169662	0.504224
93604123	0.504224
44356940	0.504224
12042143	0.504224
92845691	0.504224
86288424	0.504314
470049	0.504394
465094	0.504394
139025281	0.504402
71315149	0.504402
7045516	0.504519
513124	0.504519
513122	0.504519
5894	0.504519
3010355	0.505946
57372617	0.506263
15024543	0.506966
25266884	0.507035
5278277	0.507493
49784203	0.508023
516074	0.508141
10405378	0.508539
90472732	0.508787
3007218	0.509222
131858474	0.509282
131885132	0.509539
14430336	0.509758
57348664	0.509881
21817599	0.509934
276394	0.509934
132663	0.509943
92270653	0.510106
500247	0.510106
86592812	0.510656
121596077	0.510714
59051498	0.511015
29980301	0.511015
20285	0.511015
46875049	0.511015
134694098	0.511015
16861	0.511015
12896821	0.511015
135511145	0.511184
472658	0.511345
472640	0.511345
6479521	0.511971
3010606	0.512019
498018	0.512166
25197	0.512268
240980	0.512268
515328	0.512268
60140908	0.512268
76973118	0.512546
44150017	0.51281
42607051	0.51281
15612873	0.514051
502232	0.514095
134067785	0.514697
490683	0.51473
490682	0.51473
3011895	0.515161
91927745	0.51528
14408976	0.515691
21144622	0.515716
5279426	0.516007
13009595	0.516191
5271785	0.516265
49784137	0.516286
92243975	0.516356
5273016	0.516411
324310	0.516411
475524	0.516475
461404	0.516475
16076142	0.516485
49849608	0.516494
455763	0.516606
512591	0.516984
510978	0.517065
270861	0.517068
470024	0.517068
14430375	0.517497
452097	0.517497
160067	0.517504
289971	0.518879
448403	0.518879
129862	0.518931
10264873	0.518935
13871050	0.519012
512601	0.519326
9942889	0.519382
15955042	0.519591
9562214	0.519747
92236380	0.519747
131876195	0.519747
516086	0.519761
51360252	0.519844
71380931	0.520219
510973	0.520251
490626	0.520501
464376	0.521143
451873	0.521221
67860541	0.521221
46780426	0.521395
133688245	0.521395
134481	0.521482
7308567	0.521482
67175601	0.521865
154809499	0.522162
54506098	0.522355
70684952	0.522383
96410	0.522383
72212535	0.522383
3009784	0.5231
9992803	0.52322
58463518	0.523349
131885191	0.523389
97119	0.52357
510971	0.523616
3039710	0.524065
57246734	0.524073
10849690	0.524073
9797705	0.524159
502229	0.524387
92242775	0.524413
3006169	0.524413
477413	0.524433
9842606	0.524828
121486815	0.524956
135618594	0.525019
56671903	0.525542
14806070	0.525708
6476927	0.525871
10037499	0.525879
59859763	0.525879
56995133	0.525879
29942411	0.525879
134694166	0.525879
67419448	0.525879
121606027	0.525988
11208563	0.526327
92243772	0.526527
21818173	0.526527
135618698	0.526763
135856077	0.526763
121486764	0.526914
493442	0.526983
159738	0.527434
46936923	0.527434
443234	0.527637
71317045	0.527894
11043124	0.528466
131881043	0.52847
25182693	0.528619
67358	0.528782
154731285	0.529317
100417	0.529546
21144431	0.529849
419564	0.529849
13830101	0.529888
128252	0.53006
21817596	0.530398
276398	0.530398
92237069	0.530398
131864833	0.530474
352989	0.530474
57357987	0.53069
21140332	0.53096
10999973	0.532062
127260544	0.532294
71407380	0.532294
16226669	0.532398
25796514	0.532398
59116124	0.532398
12358445	0.532398
7035901	0.532398
5901	0.532398
513034	0.5327
493439	0.532916
57368268	0.533111
14209054	0.533155
6482479	0.533155
97107236	0.533155
92978664	0.533155
452892	0.533803
3035491	0.533873
45039906	0.533873
93977460	0.533873
10615718	0.534587
12939904	0.534587
44316328	0.534604
500902	0.534604
92845515	0.534604
59844438	0.534604
13871033	0.534604
13871035	0.534604
60122232	0.534604
23519658	0.534735
97467	0.534756
277139	0.534756
92238006	0.534756
510972	0.535045
13566112	0.535482
54021277	0.535669
11010214	0.535685
506146	0.535693
86592813	0.535811
453757	0.535955
451961	0.535977
5272660	0.536057
21069732	0.5364
100935581	0.536681
151772	0.536681
21157436	0.536804
138113809	0.537202
127258181	0.537202
93055319	0.537416
23190	0.537416
12769724	0.537416
44386188	0.537416
121011847	0.537582
137195841	0.537601
13830104	0.537704
512291	0.537786
510983	0.537863
124156	0.537863
10017261	0.537863
516066	0.538042
6102683	0.538136
92043551	0.538208
126969140	0.538208
71772549	0.538208
512708	0.538905
54558447	0.538933
49784134	0.539547
12777819	0.539668
93515751	0.539668
11447886	0.539679
6332463	0.540236
49784438	0.540456
165148	0.540847
167877	0.540847
121487065	0.540847
121597152	0.540906
92237642	0.540906
97188	0.540906
97300838	0.541055
12940782	0.541135
191831	0.541135
6482480	0.541135
354916	0.541149
5278280	0.541336
100416	0.541507
65561	0.541531
5271378	0.541531
129389389	0.542039
516079	0.54205
516084	0.54205
21824454	0.542142
11057044	0.542397
121013684	0.542397
90472731	0.54272
512590	0.543329
21765584	0.54345
5273527	0.543466
6509777	0.54357
9835398	0.543662
3011893	0.543662
9878094	0.543746
49784136	0.544128
71761524	0.544233
14071470	0.544712
71229475	0.544832
25182694	0.544984
123262984	0.545191
3007215	0.545321
451911	0.545326
65269	0.545326
54171947	0.545331
351993	0.545331
131878455	0.545644
136041721	0.545992
21157388	0.546004
89495556	0.546217
7059437	0.546217
121487515	0.546217
18323	0.546217
10377200	0.546217
11064619	0.546217
7059439	0.546217
101384428	0.546217
46780471	0.546217
45356795	0.546217
6029	0.546217
643973	0.546217
121487529	0.546217
451603	0.546241
94842080	0.546241
57197621	0.546241
54669719	0.546241
21117608	0.546241
27556877	0.546241
688478	0.546241
352976	0.546241
151382	0.546241
101507	0.546241
121487114	0.546521
69906586	0.546586
91490554	0.546586
131849184	0.54659
21151277	0.546824
6708804	0.547067
1817	0.547067
92236674	0.547085
481528	0.547507
92245604	0.547587
13093729	0.547587
92245606	0.547587
136415743	0.547629
21732849	0.547691
92236455	0.54785
6474236	0.547854
133125648	0.547854
11130341	0.547946
21828013	0.548174
92249433	0.548944
10107793	0.548944
258592	0.549108
3007919	0.549425
137699672	0.549544
493223	0.549777
5278278	0.550155
10381436	0.550359
10015847	0.550573
513276	0.550741
155290824	0.551364
21121842	0.551933
67763123	0.552106
69886241	0.552106
13564810	0.552106
54336181	0.552267
21634250	0.552366
86592810	0.552416
154701266	0.552691
5273512	0.552919
21829242	0.553081
510948	0.553334
121486885	0.553457
21140569	0.553967
9824370	0.554309
53835662	0.55434
204132	0.554367
57377074	0.55446
4555041	0.554498
3010352	0.554583
511666	0.555091
6479393	0.555315
6475823	0.555504
131881305	0.555666
10859187	0.555768
13188940	0.555799
5272663	0.556302
139026027	0.556448
57369201	0.556448
3010797	0.556552
131708540	0.556554
70021591	0.556796
76973833	0.557036
511886	0.557164
14430355	0.557349
331904	0.557349
3011905	0.557786
96547	0.557906
6595777	0.557906
71407349	0.557914
15104857	0.557956
490310	0.558055
16076141	0.558427
282734	0.558464
22793986	0.558624
139592726	0.558912
137699081	0.558912
77844690	0.559212
124223956	0.559212
21140809	0.559234
15450939	0.559375
71539358	0.559553
45356917	0.559741
13066372	0.559741
9427	0.559741
1520351	0.559741
54669724	0.559741
13066370	0.559741
7059460	0.559741
450215	0.559741
101317	0.559741
44629859	0.559741
91872277	0.559741
44630766	0.559741
121486935	0.559758
14408979	0.559786
46780472	0.559832
90472260	0.559832
49849540	0.559832
15037959	0.55996
515217	0.559976
118855918	0.560077
124202892	0.560077
156587569	0.560128
6327750	0.560192
90674669	0.560234
640874	0.560509
13831580	0.560522
3010825	0.560722
44572473	0.560957
451874	0.561009
14185422	0.561009
54263300	0.56131
10355712	0.56131
129395379	0.561367
12803301	0.561367
12803302	0.561367
11121872	0.561505
176826	0.561577
456570	0.561617
156594560	0.561776
131848792	0.561886
94358774	0.561981
121010792	0.562025
133589974	0.562519
118855855	0.562524
11022827	0.562637
101343952	0.562693
510947	0.562917
5271296	0.562974
92286289	0.563025
512678	0.563288
13831293	0.563397
59783293	0.563434
40527693	0.563434
11821635	0.563434
96889965	0.563434
177273	0.563434
466420	0.563434
2305663	0.563434
905903	0.563434
11065470	0.563434
44240813	0.563434
13873708	0.563434
122619	0.563434
100253	0.563434
321729	0.563434
512718	0.563626
9881814	0.563892
23358719	0.563892
490684	0.56398
5272654	0.564042
21668257	0.564063
67853778	0.564254
11832095	0.564444
126567728	0.564502
501519	0.564614
135440057	0.564782
131888287	0.564828
11727150	0.565107
10778286	0.565565
76973510	0.566093
76973315	0.566093
11747043	0.566093
454531	0.5664
3008139	0.56642
446824	0.566458
4471889	0.566458
196709	0.566487
53463804	0.566487
17756793	0.56658
10878902	0.56658
46874484	0.56658
100016	0.56658
51380955	0.56658
92970665	0.567057
96622	0.567112
256040	0.567112
15839349	0.567112
86295119	0.567112
469074	0.567197
3007221	0.567527
92234642	0.567548
11725011	0.567748
71369906	0.567824
10266795	0.567828
156588427	0.568351
92279361	0.568432
639409	0.5685
148033	0.56891
5270727	0.569274
121221202	0.569503
451448	0.569558
162011	0.569558
452281	0.569627
20575885	0.569675
163320930	0.569819
136126104	0.570214
135409474	0.570214
15516021	0.570302
176869	0.57071
511885	0.570747
510979	0.571199
131885796	0.571227
21821194	0.571245
510982	0.571298
21820756	0.571718
92234054	0.571718
92237996	0.572159
14558097	0.572184
17756742	0.572386
15729467	0.572387
324452	0.572398
10065192	0.572681
92264741	0.572681
471865	0.572905
6531437	0.572905
93982631	0.573
3065118	0.57304
455182	0.573179
454533	0.573179
454534	0.573179
9570	0.573252
111261	0.573252
92223676	0.573252
23616817	0.573252
163947	0.573297
466039	0.573386
121486915	0.573413
11812423	0.573814
3080604	0.574461
604832	0.57513
14367013	0.575223
7282398	0.575223
118312477	0.575223
169704	0.575223
21824456	0.575223
7282400	0.575223
1265899	0.575223
452061	0.575307
14409039	0.575307
121486745	0.575427
126704	0.575432
469184	0.575432
131850520	0.575511
3010387	0.575604
50987538	0.575705
512719	0.575705
490433	0.575769
73478	0.575916
3010378	0.575968
92339825	0.575968
136592262	0.576309
24885222	0.576339
3010291	0.576393
512135	0.576637
92253117	0.576826
57358089	0.576826
92236430	0.57698
10467227	0.577082
14162719	0.577471
3081162	0.577471
162642336	0.577505
14730263	0.577559
135788877	0.578684
21821293	0.578808
69907861	0.578819
455180	0.578924
21145872	0.578924
10400774	0.578924
10445690	0.578924
14156718	0.578931
15119224	0.579078
129674064	0.579101
22880825	0.579155
481527	0.579228
156594202	0.579253
3011900	0.579406
9885936	0.579743
355033	0.579874
21826754	0.579908
92252368	0.579908
117647970	0.579938
53759423	0.579974
11849876	0.580019
134715452	0.580076
14310518	0.580106
14498611	0.580106
500903	0.580194
13830457	0.580194
137705912	0.580194
54180064	0.580334
23519662	0.580444
10849717	0.580479
278758	0.580524
21677555	0.580593
5273506	0.580701
59504000	0.580855
59504127	0.580855
59504108	0.580855
58463530	0.580894
6479205	0.581269
121486746	0.581271
452081	0.581448
163320836	0.581473
14102245	0.581473
54703164	0.581542
92299334	0.581542
54677885	0.581542
121487026	0.581641
5271786	0.581723
13712878	0.581732
478561	0.582059
92132205	0.582267
124428631	0.582267
27191376	0.582267
29982343	0.582267
107502	0.582267
45039580	0.582267
492409	0.582838
6334060	0.582891
10106801	0.582977
71346314	0.582977
45484443	0.583128
126567807	0.583669
92143143	0.583772
492408	0.583842
3082596	0.58423
18604151	0.584303
131884916	0.584417
10490949	0.584555
10705876	0.584555
95121	0.584574
23238948	0.584718
6334197	0.584921
131884919	0.585089
44438827	0.585223
196459	0.585345
5273015	0.585345
387072	0.585347
189148	0.585509
150619	0.585544
266482	0.585674
163285434	0.585693
22880806	0.585759
131843075	0.586422
21140290	0.586803
53792010	0.586934
21769885	0.586936
15172905	0.586974
57324057	0.587045
96851	0.587045
15172876	0.587247
92234638	0.587284
21139659	0.587284
46875748	0.58739
14978	0.58739
3007220	0.58739
92209900	0.58739
135519069	0.58763
135704021	0.58763
121487517	0.587695
135427250	0.588087
53775732	0.588259
3007909	0.588377
124565863	0.588401
58451159	0.588401
135405922	0.588504
135455558	0.588818
135459781	0.588818
481518	0.588895
14541163	0.588962
452054	0.588962
452051	0.588962
511984	0.589329
3010383	0.589378
15104850	0.589484
10977550	0.589739
44355029	0.590234
137176604	0.590373
57105083	0.590388
139025303	0.59068
46781591	0.59068
10563947	0.590707
126961829	0.590762
3010384	0.591248
92246004	0.591248
510946	0.591334
11173202	0.591449
56987376	0.591452
512137	0.591497
451365	0.591517
14308796	0.591517
122088	0.591517
21140410	0.591756
137795695	0.59211
132283239	0.59211
25185460	0.59211
129317616	0.59211
135600340	0.592174
136663945	0.592174
502244	0.5922
3006926	0.592533
91809617	0.592673
102339225	0.592879
137937484	0.593059
14061175	0.593059
5270589	0.593185
97297	0.593208
45039587	0.593208
25880707	0.593208
6419781	0.593208
5273750	0.593289
492407	0.5937
506144	0.593854
453994	0.593854
355900	0.593854
135625267	0.593868
7116198	0.593918
6561296	0.593918
7075199	0.593918
453689	0.594017
71374940	0.594082
14367015	0.594237
14367014	0.594237
11043123	0.594274
46876980	0.594274
464378	0.594342
510998	0.594539
6481831	0.595078
97454	0.595417
16747775	0.595593
10778285	0.596174
132073959	0.596174
89998825	0.596174
455669	0.596255
490432	0.596447
121487082	0.596507
121487083	0.596507
92268298	0.596715
92228261	0.596741
44451143	0.596741
97235	0.596809
92244157	0.596809
10833407	0.596942
97199	0.596945
512131	0.596945
446940	0.597008
5272744	0.597176
447069	0.597233
3011904	0.59728
71487589	0.597412
136250325	0.597663
71371890	0.597666
131844007	0.597773
98911	0.597775
135959544	0.59794
131875799	0.598185
688364	0.598313
111081	0.598313
482510	0.598344
129893514	0.598551
121486926	0.598819
470797	0.599103
391259	0.599103
10848780	0.599106
72195	0.599214
22027846	0.599214
510970	0.599264
501518	0.599388
512706	0.599492
22899187	0.59992
135771870	0.600033
11779374	0.600045
21140827	0.600356
91926387	0.600552
14999717	0.600615
92249436	0.600703
15613706	0.600703
9878327	0.600963
5272743	0.601232
131883949	0.60125
131858038	0.60125
92266557	0.60125
228966	0.601371
124301793	0.601371
13108042	0.60151
5272210	0.601513
25030767	0.601531
72182	0.601589
446658	0.60162
59180612	0.60178
76974600	0.601851
136236455	0.601976
71539360	0.602161
14409040	0.602282
130209	0.602684
472633	0.60287
122130429	0.603067
15119214	0.603232
10612861	0.603276
189108	0.603309
162660830	0.603362
6560416	0.60337
490438	0.603376
91483617	0.603958
57173805	0.604154
146674828	0.604424
44567065	0.60457
121487118	0.604814
54683691	0.604834
124526965	0.604888
57453626	0.604888
118703664	0.604888
58455422	0.604888
11311503	0.604888
118703665	0.604888
146014346	0.604888
122220071	0.604964
129437559	0.604978
22880800	0.605044
478563	0.605053
470030	0.605126
483941	0.605221
5287841	0.605318
21787858	0.605349
3005951	0.605395
482632	0.605528
466400	0.605591
3010388	0.605657
46875339	0.605657
92246571	0.605657
134229912	0.605898
135848702	0.606046
123993511	0.606085
137628662	0.606204
512136	0.606282
447192	0.606305
98575509	0.606827
40493564	0.606827
453168	0.606843
139267848	0.606918
139591931	0.606918
139267847	0.606918
139267828	0.606918
135692739	0.607061
14162717	0.607336
147839	0.607336
3032355	0.607391
3000603	0.607391
10334791	0.607469
71732376	0.607817
135410340	0.608033
135740163	0.608033
135453973	0.608033
150621	0.608076
11832583	0.608153
3037046	0.608319
3002879	0.60839
67228673	0.608412
22723869	0.608412
171555	0.60849
54531450	0.608525
23112639	0.608525
53678903	0.608677
513206	0.608944
137221145	0.609097
136842926	0.609097
144823459	0.609234
10778362	0.609286
11196409	0.609302
356796	0.609385
92236585	0.609438
261450	0.609438
92236583	0.609438
459890	0.609438
152488	0.610042
324745	0.610325
73662	0.610589
72200	0.610589
7204908	0.610589
44629931	0.610589
3010385	0.610653
3007126	0.610657
25231310	0.610721
10753744	0.610782
131882742	0.611187
495012	0.611196
11004885	0.611239
15742006	0.611264
369086	0.611305
131072	0.611305
10469019	0.611327
66906535	0.611433
845540	0.611508
11697484	0.611639
10400520	0.611892
21854430	0.612155
506145	0.61218
12799571	0.612192
98801	0.612197
92230795	0.612262
18661221	0.612262
69454489	0.612267
71744251	0.612267
11390847	0.612493
10264872	0.612516
53243689	0.612643
126968805	0.612759
139024751	0.612759
251784	0.612759
25728863	0.612759
7272023	0.612759
11276944	0.612759
118026092	0.612774
86306492	0.612802
71371189	0.612883
124428635	0.613031
92918	0.613031
97000	0.613031
7282382	0.613031
14135553	0.613031
490445	0.613169
102461643	0.613271
118294346	0.613329
500026	0.613489
101947567	0.613525
21677361	0.614121
452095	0.614156
14430353	0.614156
22875362	0.614172
21852786	0.614366
11507479	0.61453
3034423	0.61453
6595185	0.61453
676166	0.61453
512674	0.614611
135509485	0.614719
135511868	0.614719
136257804	0.614719
136843263	0.614719
137090331	0.614719
54256130	0.614912
513870	0.615264
6708818	0.615462
688121	0.615462
490037	0.615462
6256	0.615462
150628	0.615558
92231363	0.61598
29921448	0.61598
15612863	0.616119
136896502	0.616465
135453913	0.616465
10107866	0.616502
512604	0.616512
21817403	0.616538
92252780	0.616751
97692	0.616751
67113473	0.616985
21121840	0.617069
134004	0.617069
54339089	0.617154
355902	0.617259
453997	0.617259
9900206	0.617523
268421	0.618048
92245911	0.618048
97304120	0.618163
136674916	0.618339
117940991	0.618355
131881293	0.618478
110158190	0.618558
135600345	0.618814
21125843	0.618853
10491412	0.619065
117590597	0.619176
137699191	0.619191
138058736	0.619191
146160048	0.619191
137699364	0.619199
5272754	0.619561
15289165	0.619571
10107217	0.61965
11825687	0.619706
135410347	0.619711
135398550	0.619815
131885345	0.620264
451912	0.620381
121487449	0.621253
22880824	0.621511
11358266	0.621717
135463451	0.621737
131884920	0.621828
124345	0.621841
92286287	0.621841
121486830	0.621959
188276	0.622146
21769737	0.622202
98625	0.622209
44366461	0.622391
515085	0.622525
155905558	0.622637
134520771	0.622873
131850900	0.623305
155905580	0.623362
188350	0.623371
3012549	0.623787
2999329	0.623811
71435310	0.623834
54297338	0.623917
125734	0.623917
121487030	0.624051
133609839	0.624286
502242	0.624323
13989304	0.624453
131852043	0.624459
6481236	0.62453
57453628	0.62453
124223848	0.62453
44451208	0.624679
92229576	0.624679
136030678	0.624823
150669	0.624866
29921449	0.624972
512869	0.625023
92264349	0.625023
131858703	0.625285
5271015	0.625322
131881064	0.625392
92247204	0.625392
125503985	0.625403
512130	0.625489
102601363	0.625597
121216248	0.625634
121698	0.62568
13052734	0.62568
6713638	0.625927
4127885	0.625927
21677217	0.625927
73514	0.625927
92236327	0.625927
512707	0.626029
489849	0.626151
10063737	0.626724
9921551	0.626788
451890	0.626788
65102	0.626813
58834006	0.626813
21820463	0.626813
12800105	0.626813
135435173	0.626835
211875	0.626852
136195916	0.627129
121486862	0.627257
135422917	0.627539
15953881	0.627744
451915	0.627744
135616711	0.627921
101784714	0.627948
10782439	0.627972
13993514	0.627979
10198304	0.627979
135538642	0.628053
136076706	0.628053
135532713	0.628053
135538671	0.628053
135434940	0.628053
135415565	0.628053
135800807	0.628053
136854232	0.628053
135433837	0.628053
137274215	0.628053
136236459	0.628225
73651	0.62832
44308741	0.62832
490435	0.62832
137128749	0.628376
10611197	0.628552
14843513	0.62861
455179	0.628625
454528	0.628625
454530	0.628625
373953	0.628681
121228750	0.628902
102381563	0.628984
22885207	0.629092
10611929	0.62922
12358319	0.629241
512657	0.629299
71313037	0.6293
71776184	0.6293
121486927	0.629773
11032861	0.629774
13566115	0.629787
22880803	0.629833
73345328	0.629955
44146603	0.62997
46926326	0.630233
70385614	0.630327
267808	0.630699
14682078	0.630699
66649608	0.630834
21769748	0.630887
23629091	0.63093
13872084	0.631086
92237723	0.631113
21627890	0.631113
471486	0.631124
511669	0.63114
121487049	0.63114
490630	0.631262
58761796	0.631276
122707085	0.631601
297594	0.631601
451856	0.631616
14430362	0.631633
452096	0.631633
11065406	0.631648
92233963	0.631648
12137955	0.631648
3007920	0.631746
124715	0.631746
3006222	0.631746
121217034	0.631767
121487456	0.631844
15934097	0.631978
21829540	0.632041
135443731	0.632047
131884619	0.63217
125494152	0.632215
125494151	0.632215
135483941	0.632252
135483976	0.632252
139086336	0.632507
94725030	0.632767
92131953	0.632767
9816781	0.632767
92233339	0.632767
266234	0.632767
12800104	0.632767
58834035	0.632767
57061669	0.632767
94725032	0.632767
447594	0.632767
11032790	0.632767
84392	0.632767
3035929	0.632767
14191021	0.632913
135771852	0.633176
101339887	0.6332
102531168	0.6332
59504008	0.633282
59504149	0.633282
59504120	0.633282
21854120	0.63329
71337875	0.633439
71352385	0.633439
59252566	0.633798
131700647	0.633804
639614	0.633804
13941609	0.633819
128656	0.633823
92221238	0.633828
92221236	0.633828
134693227	0.633828
13870936	0.633869
6566064	0.633921
97480	0.633921
7099911	0.633921
18881	0.633921
23617998	0.633921
92161858	0.633952
271276	0.633952
24820718	0.633974
13188936	0.63409
171798	0.634116
150625	0.634191
92233380	0.634333
131881445	0.634333
136795196	0.63442
136670059	0.63442
451960	0.634438
121487106	0.634569
129787857	0.63459
456327	0.634747
461854	0.634747
456648	0.634747
146674673	0.634872
3006944	0.634971
493453	0.635011
131853290	0.635032
135921348	0.635075
121217041	0.635114
54343230	0.635367
131884262	0.635511
58078371	0.635708
121487074	0.636039
56961027	0.636129
3011894	0.636236
131880513	0.636321
90356982	0.63636
452090	0.636398
509522	0.636398
121486893	0.636427
11776820	0.636441
10041129	0.636884
5273013	0.637
29982346	0.637027
45039581	0.637027
11697766	0.637027
45052066	0.637029
156594694	0.637029
512705	0.637202
129561	0.637249
9813298	0.63725
10610233	0.637298
454870	0.63731
330407	0.637327
131881789	0.637327
5270525	0.63733
67566518	0.637707
11622526	0.637718
234984	0.637776
191626	0.637785
10357262	0.637845
21855714	0.637939
145681	0.637996
501517	0.638131
482589	0.638329
10019708	0.638331
92229125	0.638338
44451061	0.638338
167798	0.638368
56851256	0.638511
11097661	0.63853
296237	0.638751
155905982	0.638765
93982611	0.638871
135415644	0.639112
451554	0.639128
122174083	0.639152
45052344	0.639264
42637091	0.639534
495537	0.639686
44563542	0.63979
21627889	0.63993
122129480	0.639973
10105820	0.639986
163320923	0.640021
131851102	0.640046
135696522	0.640089
136045770	0.640089
135403914	0.640089
135812388	0.640089
135434786	0.640101
102063598	0.640205
71340337	0.640309
451616	0.640309
92209628	0.640318
7088272	0.640318
97577	0.640318
152521	0.640412
155903793	0.640601
3000303	0.640696
3000242	0.640696
595375	0.640715
90673985	0.640722
40506074	0.640796
3000824	0.640796
277822	0.640796
512178	0.640834
356732	0.640938
167321	0.640938
22211279	0.64118
124430633	0.641223
124430634	0.641223
54176875	0.641225
135504147	0.641252
175972	0.641254
15289164	0.641406
72212336	0.641406
11807674	0.641443
70889269	0.641607
644174	0.641607
6560357	0.641607
21704	0.641607
638036	0.641607
10890867	0.641607
5702004	0.641607
6420052	0.641607
447916	0.641607
121486812	0.641607
12358320	0.641607
12358321	0.641607
12358325	0.641607
453548	0.641607
448378	0.641607
53384930	0.641607
54732806	0.641607
7040251	0.641607
23279550	0.641607
139025871	0.641607
12358322	0.641607
160739	0.641607
191	0.641607
122130566	0.64176
54432316	0.641895
3034648	0.641897
3034638	0.641897
10923602	0.641925
10492175	0.641925
71442564	0.641925
11311566	0.642055
452612	0.642085
126283	0.642094
459903	0.642094
135410302	0.642122
20832934	0.642213
14464884	0.642271
259345	0.642613
511763	0.642661
51414401	0.642773
146108	0.642773
13831291	0.642773
22884229	0.642779
15955633	0.642795
121219141	0.642795
71342993	0.642804
71354368	0.642804
15410715	0.643234
11346304	0.643254
21580289	0.643392
11666177	0.643415
135465599	0.64344
135627705	0.64344
136062166	0.64344
135933068	0.64344
135622951	0.64344
136826947	0.64344
136065188	0.64344
54518623	0.643476
2729604	0.64351
94196	0.64351
7059462	0.64351
7195995	0.64351
68206315	0.64351
1263225	0.64351
27661670	0.64351
9992804	0.643614
6536767	0.643832
5273934	0.643832
21854434	0.643836
161583	0.643901
125654	0.64414
93258	0.64414
9992648	0.644284
7269451	0.644284
13887579	0.644284
107643	0.644284
92132277	0.644284
21825596	0.64431
87825371	0.64441
90663906	0.644423
512134	0.644642
92264929	0.644642
333596	0.644642
98581	0.644721
481523	0.644795
3005947	0.644821
3006523	0.644855
3006522	0.644855
21139907	0.64503
13833767	0.64503
259853	0.64503
121487089	0.64509
21456083	0.645467
3005950	0.645467
3358362	0.645763
44432644	0.645763
10377839	0.645784
197020	0.645784
76282776	0.645815
[truncated: 5,262 more rows]

[truncated: 2 more sheets: 2. P. gingivalis, x. Hydrogel]
