# Supplementary material for: Development of Machine Learning Models for Precise Prediction of Bioactive Supramolecular Nucleoside Hydrogels
Source: Research Square preprint supplement (doi:10.21203/rs.3.rs-6888838/v1), 2025-07-10
Supplement: Supplementary file 11 [file d1f634ad5b8c6793ed10c328.xlsx]

## Sheet: Total
Supplementary Data 9. The result of the Molecular Attribute Specificity Index (MASI)
cid	Nontox	Anti-P. gingivalis	Anti-HSV-1	Anti-VZV	Anti-EBV	Anti-HIV	Anti-IL-1beta	Anti-TNF-alpha	Anti-CAL 27	Hydrogel	CID	MASI_Feature	MASI_Feature_Index	Normalized_MASI_Feature_Index	MASI_Index_Nontox	MASI_Index_Anti-EBV	MASI_Index_Hydrogel
5273008	-4.00169	0.848851	0.413187	0.107653	0.726192	0.0679527	0.517796	0.262714	0.482848	-3.04151	5273008	Anti-EBV	6.25629	0.000662076	6.25629	6.25629	6.25629
5273004	-3.87469	0.724497	0.384725	0.0706856	2.34769	0.0834429	0.462721	0.781503	0.562622	-2.45719	5273004	Anti-EBV	5.50082	0.000571938	5.50082	5.50082	5.50082
250899	-3.83422	0.945895	0.389769	0.0758157	-0.202813	0.0573038	0.179403	0.739264	0.28758	-2.52004	250899	Anti-EBV	3.20068	0.000297502	3.20068	3.20068	3.20068
15926747	-3.80666	0.493738	0.367455	0.186496	-0.00550274	0.136382	0.657401	0.487064	0.510686	-0.708274	15926747	Anti-EBV	1.02787	3.82585e-05	1.02787	1.02787	1.02787
9882903	-3.80666	0.780552	0.385521	0.429147	0.0947681	0.117928	0.473706	0.428866	0.594849	-0.77687	9882903	Anti-EBV	1.11396	4.85294e-05	1.11396	1.11396	1.11396
354624	-3.80666	0.780552	0.385521	0.429147	0.0947681	0.117928	0.473706	0.428866	0.594849	-0.77687	354624	Anti-EBV	1.11396	4.85294e-05	1.11396	1.11396	1.11396
13989334	-3.78941	0.861931	0.395029	0.237485	0.0935261	0.353668	0.591054	0.76617	0.604856	-1.07974	13989334	Anti-EBV	1.31944	7.30465e-05	1.31944	1.31944	1.31944
13989335	-3.78941	0.861931	0.395029	0.237485	0.0935261	0.353668	0.591054	0.76617	0.604856	-1.07974	13989335	Anti-EBV	1.31944	7.30465e-05	1.31944	1.31944	1.31944
492197	-3.76971	0.595034	0.409161	0.0589562	0.961973	0.0659687	0.311152	0.554989	0.429225	-1.22812	492197	Anti-EBV	1.92572	0.000145384	1.92572	1.92572	1.92572
6483433	-3.74177	0.892924	0.410465	0.428686	0.723649	0.0444966	0.414394	0.877507	0.545792	-1.30705	6483433	Anti-EBV	1.88663	0.000140719	1.88663	1.88663	1.88663
516053	-3.71271	0.926398	0.401639	0.23039	1.27135	0.160491	0.645463	0.557746	0.47552	-1.97442	516053	Anti-EBV	3.34772	0.000315047	3.34772	3.34772	3.34772
3034808	-3.6768	0.556175	0.389757	0.201377	-0.164127	0.354741	0.503127	0.539888	0.475406	-0.898697	3034808	Anti-EBV	1.08104	4.4602e-05	1.08104	1.08104	1.08104
14485373	-3.6768	0.556175	0.389757	0.201377	-0.164127	0.354741	0.503127	0.539888	0.475406	-0.898697	14485373	Anti-EBV	1.08104	4.4602e-05	1.08104	1.08104	1.08104
470067	-3.67315	0.718263	0.369696	0.269134	1.55625	0.0740654	0.471249	0.445373	0.431665	-2.91691	470067	Anti-EBV	9.07203	0.000998029	9.07203	9.07203	9.07203
12777818	-3.67058	0.360095	0.353582	0.0371763	-0.501524	0.4589	0.367729	0.774205	0.365253	-2.52276	12777818	Anti-EBV	3.19739	0.00029711	3.19739	3.19739	3.19739
87824027	-3.66614	0.722926	0.376849	0.305513	0.216436	0.272375	0.488865	0.75777	0.587229	-1.1077	87824027	Anti-EBV	1.43903	8.73154e-05	1.43903	1.43903	1.43903
296233	-3.66614	0.722926	0.376849	0.305513	0.216436	0.272375	0.488865	0.75777	0.587229	-1.1077	296233	Anti-EBV	1.43903	8.73154e-05	1.43903	1.43903	1.43903
21147181	-3.64288	0.790533	0.381424	0.42369	0.338901	0.267656	0.494963	0.566549	0.502787	-0.745702	21147181	Anti-EBV	1.23653	6.31544e-05	1.23653	1.23653	1.23653
24867261	-3.64288	0.790533	0.381424	0.42369	0.338901	0.267656	0.494963	0.566549	0.502787	-0.745702	24867261	Anti-EBV	1.23653	6.31544e-05	1.23653	1.23653	1.23653
14330066	-3.56305	0.633895	0.396365	0.122824	0.364537	0.365762	0.585754	0.52998	0.686774	-0.891162	14330066	Anti-EBV	1.37173	7.92855e-05	1.37173	1.37173	1.37173
14330067	-3.56305	0.633895	0.396365	0.122824	0.364537	0.365762	0.585754	0.52998	0.686774	-0.891162	14330067	Anti-EBV	1.37173	7.92855e-05	1.37173	1.37173	1.37173
53791036	-3.54725	0.8256	0.413935	0.228233	0.252451	0.100485	0.393407	0.513695	0.591375	-1.47742	53791036	Anti-EBV	1.88904	0.000141007	1.88904	1.88904	1.88904
92132405	-3.54591	0.887426	0.39424	0.326781	0.426846	0.284707	0.580619	0.703022	0.724189	-0.860552	92132405	Anti-EBV	1.38509	8.08796e-05	1.38509	1.38509	1.38509
69626224	-3.54591	0.887426	0.39424	0.326781	0.426846	0.284707	0.580619	0.703022	0.724189	-0.860552	69626224	Anti-EBV	1.38509	8.08796e-05	1.38509	1.38509	1.38509
11778706	-3.54591	0.887426	0.39424	0.326781	0.426846	0.284707	0.580619	0.703022	0.724189	-0.860552	11778706	Anti-EBV	1.38509	8.08796e-05	1.38509	1.38509	1.38509
10040688	-3.54445	0.740065	0.384549	0.440861	-0.190622	0.122935	0.443336	0.497707	0.588375	-0.336437	10040688	Anti-EBV	0.771384	7.65625e-06	0.771384	0.771384	0.771384
77844687	-3.54445	0.428419	0.366532	0.13137	-0.442233	0.219363	0.617125	0.479815	0.49984	-0.264344	77844687	Hydrogel	0.788198	9.66232e-06	0.788198	0.788198	0.788198
492559	-3.53171	0.529445	0.366749	0.189108	1.2705	0.179905	0.572074	0.548656	0.444634	-1.96046	492559	Anti-EBV	3.61514	0.000346953	3.61514	3.61514	3.61514
12777820	-3.49669	0.306067	0.30761	0.0207666	-0.524461	0.411017	0.346547	0.806226	0.344235	-2.12112	12777820	Anti-EBV	2.34859	0.000195837	2.34859	2.34859	2.34859
14803115	-3.45889	0.587024	0.393433	0.153726	1.5894	0.133651	0.375174	0.74309	0.828749	-0.168916	14803115	Anti-EBV	1.46292	9.01656e-05	1.46292	1.46292	1.46292
14803116	-3.45889	0.587024	0.393433	0.153726	1.5894	0.133651	0.375174	0.74309	0.828749	-0.723464	14803116	Anti-EBV	1.90285	0.000142654	1.90285	1.90285	1.90285
5487206	-3.42364	0.953793	0.426145	0.0833722	3.33507	0.471121	0.305717	0.746512	0.48781	-0.723464	5487206	Anti-EBV	2.83274	0.000253603	2.83274	2.83274	2.83274
492117	-3.41127	0.413249	0.306347	0.178363	0.754155	0.0334582	0.327861	0.505849	0.827379	-0.951905	492117	Anti-EBV	1.68814	0.000117036	1.68814	1.68814	1.68814
492116	-3.41127	0.413249	0.306347	0.178363	0.754155	0.0334582	0.327861	0.505849	0.827379	-0.049516	492116	Anti-EBV	1.04519	4.03246e-05	1.04519	1.04519	1.04519
13989343	-3.39468	0.595291	0.371219	0.280747	0.468804	0.142933	0.512988	0.789297	0.585842	-0.049516	13989343	Anti-EBV	0.926229	2.61313e-05	0.926229	0.926229	0.926229
162354766	-3.37335	0.391841	0.354037	0.241613	-0.218608	0.0964444	0.489297	0.816638	0.566453	-0.631697	162354766	Anti-EBV	0.920183	2.54099e-05	0.920183	0.920183	0.920183
15172869	-3.36545	0.53743	0.410634	0.256387	0.0620359	0.0536722	0.325497	0.755073	0.601468	-0.669262	15172869	Anti-EBV	1.09068	4.57528e-05	1.09068	1.09068	1.09068
3009936	-3.33007	0.35073	0.403678	0.150502	1.66126	0.0449369	0.542323	0.882546	0.811937	-0.780026	3009936	Anti-EBV	2.061	0.000161524	2.061	2.061	2.061
90487625	-3.32753	0.847385	0.444273	0.0716033	-0.762928	0.256111	0.426834	0.779123	0.661766	-1.12919	90487625	Anti-EBV	0.942718	2.80986e-05	0.942718	0.942718	0.942718
11551453	-3.30874	0.646278	0.400059	0.334053	-0.443582	0.0399769	0.483733	0.685605	0.577421	-2.88354	11551453	Anti-EBV	8.82218	0.000968219	8.82218	8.82218	8.82218
9965654	-3.2697	0.501036	0.389217	0.179146	-0.433565	0.486311	0.379382	0.504706	0.463831	-2.10684	9965654	Anti-EBV	2.74203	0.00024278	2.74203	2.74203	2.74203
14284094	-3.23066	0.754783	0.381064	0.417266	-0.125544	0.206768	0.412092	0.600413	0.495331	-0.439271	14284094	Anti-EBV	0.866047	1.89507e-05	0.866047	0.866047	0.866047
511719	-3.2265	0.72858	0.441436	0.18274	0.874309	0.186409	0.492809	0.458931	0.66151	-0.290328	511719	Anti-EBV	1.26805	6.69149e-05	1.26805	1.26805	1.26805
21140106	-3.22602	0.384394	0.400304	0.12987	1.11831	0.0562398	0.657206	0.925757	0.807023	-1.98247	21140106	Anti-EBV	4.23339	0.000420718	4.23339	4.23339	4.23339
15573114	-3.20889	0.595125	0.407262	0.156555	0.391873	0.277824	0.567129	0.546641	0.638071	-0.748832	15573114	Anti-EBV	1.36286	7.82264e-05	1.36286	1.36286	1.36286
9879442	-3.20889	0.595125	0.407262	0.156555	0.391873	0.277824	0.567129	0.546641	0.638071	-0.57818	9879442	Anti-EBV	1.22858	6.22055e-05	1.22858	1.22858	1.22858
15573115	-3.20889	0.595125	0.407262	0.156555	0.391873	0.277824	0.567129	0.546641	0.638071	-0.57818	15573115	Anti-EBV	1.22858	6.22055e-05	1.22858	1.22858	1.22858
44398142	-3.20889	0.595125	0.407262	0.156555	0.391873	0.277824	0.567129	0.546641	0.638071	-0.57818	44398142	Anti-EBV	1.22858	6.22055e-05	1.22858	1.22858	1.22858
40488632	-3.20889	0.595125	0.407262	0.156555	0.391873	0.277824	0.567129	0.546641	0.638071	-0.57818	40488632	Anti-EBV	1.22858	6.22055e-05	1.22858	1.22858	1.22858
44629847	-3.20889	0.595125	0.407262	0.156555	0.391873	0.277824	0.567129	0.546641	0.638071	-0.57818	44629847	Anti-EBV	1.22858	6.22055e-05	1.22858	1.22858	1.22858
11957496	-3.20889	0.595125	0.407262	0.156555	0.391873	0.277824	0.567129	0.546641	0.638071	-0.57818	11957496	Anti-EBV	1.22858	6.22055e-05	1.22858	1.22858	1.22858
6603778	-3.20889	0.595125	0.407262	0.156555	0.391873	0.277824	0.567129	0.546641	0.638071	-0.57818	6603778	Anti-EBV	1.22858	6.22055e-05	1.22858	1.22858	1.22858
504745	-3.15573	0.541238	0.429479	0.29859	0.730873	0.194226	0.639102	0.885611	0.674279	-0.57818	504745	Anti-EBV	1.42533	8.56805e-05	1.42533	1.42533	1.42533
71775556	-3.15275	0.921293	0.394778	0.498205	0.973815	0.0663977	0.394511	0.575746	0.534103	-0.375981	71775556	Anti-EBV	1.39455	8.20084e-05	1.39455	1.39455	1.39455
124201	-3.14231	0.792523	0.402514	0.317414	0.126983	0.419632	0.357917	0.60891	0.598406	-0.717818	124201	Anti-EBV	1.19987	5.87806e-05	1.19987	1.19987	1.19987
493452	-3.14006	0.511431	0.382291	0.399692	-0.879937	0.3171	0.258657	0.718952	0.508912	-1.16466	493452	Anti-EBV	0.910937	2.43067e-05	0.910937	0.910937	0.910937
287709	-3.1127	0.331305	0.435989	0.111722	0.686944	0.0794345	0.366503	0.812196	0.554706	-0.358478	287709	Anti-EBV	1.2439	6.40328e-05	1.2439	1.2439	1.2439
22791353	-3.11161	0.819289	0.420724	0.437847	0.952541	0.0884757	0.586485	0.61908	0.651275	-0.415758	22791353	Anti-EBV	1.42489	8.56284e-05	1.42489	1.42489	1.42489
128924	-3.10516	0.187323	0.33395	0.0543533	-0.592915	0.0299319	0.645501	0.309723	0.799537	-0.729833	128924	Anti-EBV	0.78862	9.71269e-06	0.78862	0.78862	0.78862
92132157	-3.09828	0.697563	0.40891	0.144816	1.04111	0.419226	0.688789	0.695056	0.817036	-0.729959	92132157	Anti-EBV	1.76467	0.000126168	1.76467	1.76467	1.76467
73265308	-3.09828	0.697563	0.40891	0.144816	1.04111	0.419226	0.688789	0.695056	0.817036	-0.748217	73265308	Anti-EBV	1.78387	0.000128459	1.78387	1.78387	1.78387
147569	-3.09828	0.697563	0.40891	0.144816	1.04111	0.419226	0.688789	0.695056	0.817036	-0.748217	147569	Anti-EBV	1.78387	0.000128459	1.78387	1.78387	1.78387
6602111	-3.09828	0.697563	0.40891	0.144816	1.04111	0.419226	0.688789	0.695056	0.817036	-0.748217	6602111	Anti-EBV	1.78387	0.000128459	1.78387	1.78387	1.78387
90488943	-3.09828	0.697563	0.40891	0.144816	1.04111	0.419226	0.688789	0.695056	0.817036	-0.748217	90488943	Anti-EBV	1.78387	0.000128459	1.78387	1.78387	1.78387
13009312	-3.09828	0.697563	0.40891	0.144816	1.04111	0.419226	0.688789	0.695056	0.817036	-0.748217	13009312	Anti-EBV	1.78387	0.000128459	1.78387	1.78387	1.78387
265574	-3.09687	0.716803	0.332541	0.0468019	0.938205	0.0294855	0.455192	0.328807	0.757268	-0.748217	265574	Anti-EBV	1.72255	0.000121143	1.72255	1.72255	1.72255
24906265	-3.09687	0.420847	0.347141	0.145279	-0.0504854	0.0313996	0.640299	0.375549	0.807176	-0.194563	24906265	Anti-EBV	0.777308	8.36298e-06	0.777308	0.777308	0.777308
10085225	-3.09687	0.420847	0.347141	0.145279	-0.0504854	0.0313996	0.640299	0.375549	0.807176	-0.503887	10085225	Anti-EBV	0.954387	2.94908e-05	0.954387	0.954387	0.954387
92236137	-3.09687	0.716803	0.332541	0.0468019	0.938205	0.0294855	0.455192	0.328807	0.757268	-0.503887	92236137	Anti-EBV	1.49362	9.38276e-05	1.49362	1.49362	1.49362
92236135	-3.09687	0.716803	0.332541	0.0468019	0.938205	0.0294855	0.455192	0.328807	0.757268	-0.194563	92236135	Anti-EBV	1.25907	6.58429e-05	1.25907	1.25907	1.25907
16760678	-3.09687	0.420847	0.347141	0.145279	-0.0504854	0.0313996	0.640299	0.375549	0.807176	-0.194563	16760678	Anti-EBV	0.777308	8.36298e-06	0.777308	0.777308	0.777308
131846804	-3.09687	0.716803	0.332541	0.0468019	0.938205	0.0294855	0.455192	0.328807	0.757268	-0.503887	131846804	Anti-EBV	1.49362	9.38276e-05	1.49362	1.49362	1.49362
154726303	-3.09477	0.854724	0.376093	0.317074	-0.258252	0.196752	0.585065	0.803407	0.785002	-0.194563	154726303	Hydrogel	0.738857	3.77529e-06	0.738857	0.738857	0.738857
493454	-3.08939	0.532701	0.38487	0.343742	-0.754549	0.38386	0.361226	0.565828	0.500248	-0.320001	493454	Hydrogel	0.970307	3.13902e-05	0.970307	0.970307	0.970307
197610	-3.07472	0.883713	0.386552	0.343328	-0.114383	0.0482984	0.538434	0.421063	0.810913	-0.520048	197610	Anti-EBV	0.93167	2.67804e-05	0.93167	0.93167	0.93167
10517505	-3.07472	0.883713	0.386552	0.343328	-0.114383	0.0482984	0.538434	0.421063	0.810913	-0.268211	10517505	Anti-EBV	0.784617	9.23513e-06	0.784617	0.784617	0.784617
9973143	-3.04892	0.819256	0.362996	0.0344246	0.549238	0.0331889	0.366976	0.614542	0.66604	-0.268211	9973143	Anti-EBV	1.12284	4.95892e-05	1.12284	1.12284	1.12284
56977943	-3.04498	0.758438	0.366275	0.241978	-0.504806	0.33502	0.32487	0.667757	0.426485	-1.11471	56977943	Anti-EBV	1.15395	5.33007e-05	1.15395	1.15395	1.15395
100938413	-3.01898	0.696229	0.408351	0.415687	-0.321854	0.0502367	0.569967	0.701979	0.629846	-1.08982	100938413	Anti-EBV	1.27007	6.71559e-05	1.27007	1.27007	1.27007
14018661	-3.01755	0.620372	0.387321	0.244074	-0.946935	0.184498	0.413102	0.707739	0.478722	-0.555741	14018661	Hydrogel	0.974282	3.18646e-05	0.974282	0.974282	0.974282
13989345	-3.00405	0.518023	0.411565	0.329181	0.158749	0.140498	0.51242	0.62264	0.600495	-0.676579	13989345	Anti-EBV	1.21466	6.05448e-05	1.21466	1.21466	1.21466
470065	-3.00222	0.576063	0.371498	0.0877755	2.02466	0.193577	0.470814	0.440431	0.434549	-0.496748	470065	Anti-EBV	2.13031	0.000169793	2.13031	2.13031	2.13031
44626655	-2.99097	0.620708	0.395319	0.400705	-0.0449064	0.130482	0.687315	0.716516	0.807016	-2.9901	44626655	Anti-EBV	4682	0.558539	4682	4682	4682
21140467	-2.97181	0.425794	0.417328	0.204933	0.725858	0.0812504	0.487482	0.91691	0.614574	-0.233552	21140467	Anti-EBV	1.2026	5.9106e-05	1.2026	1.2026	1.2026
512717	-2.95671	0.805008	0.417638	0.516699	0.920568	0.231187	0.571828	0.919885	0.821381	-1.13145	512717	Anti-EBV	2.29699	0.00018968	2.29699	2.29699	2.29699
121486905	-2.95341	0.672537	0.340505	0.307668	-0.355488	0.16502	0.494489	0.694203	0.371799	-0.950274	121486905	Anti-EBV	1.12702	5.00878e-05	1.12702	1.12702	1.12702
512127	-2.93206	0.554824	0.412408	0.232631	-0.766085	0.154095	0.726891	0.700813	0.80404	-0.900735	512127	Anti-EBV	0.800845	1.11713e-05	0.800845	0.800845	0.800845
71305626	-2.93206	0.554824	0.412408	0.232631	-0.766085	0.154095	0.726891	0.700813	0.80404	-0.78741	71305626	Anti-EBV	0.721164	1.6643e-06	0.721164	0.721164	0.721164
46874399	-2.93206	0.554824	0.412408	0.232631	-0.766085	0.154095	0.726891	0.700813	0.80404	-0.78741	46874399	Anti-EBV	0.721164	1.6643e-06	0.721164	0.721164	0.721164
45038620	-2.93206	0.554824	0.412408	0.232631	-0.766085	0.154095	0.726891	0.700813	0.80404	-0.78741	45038620	Anti-EBV	0.721164	1.6643e-06	0.721164	0.721164	0.721164
92233558	-2.93206	0.554824	0.412408	0.232631	-0.766085	0.154095	0.726891	0.700813	0.80404	-0.78741	92233558	Anti-EBV	0.721164	1.6643e-06	0.721164	0.721164	0.721164
10039594	-2.92461	0.38809	0.343652	0.396322	0.250594	0.141657	0.490584	0.707491	0.547447	-0.78741	10039594	Anti-EBV	1.39396	8.19374e-05	1.39396	1.39396	1.39396
492200	-2.89504	0.846105	0.449818	0.271856	-0.745483	0.155457	0.348444	0.412382	0.395374	-1.99069	492200	Anti-EBV	2.65431	0.000232313	2.65431	2.65431	2.65431
121486895	-2.89201	0.707738	0.332183	0.0439993	1.54213	0.0724302	0.521418	0.735328	0.728106	-1.15448	121486895	Anti-EBV	2.90192	0.000261856	2.90192	2.90192	2.90192
3010354	-2.86685	0.628522	0.481405	0.190035	0.519286	0.728876	0.506443	0.910577	0.553583	-0.786607	3010354	Anti-EBV	1.59488	0.00010591	1.59488	1.59488	1.59488
125496047	-2.86425	0.566105	0.267296	0.11341	2.14406	0.254025	0.692747	0.584449	0.608662	-1.17023	125496047	Anti-EBV	3.47393	0.000330105	3.47393	3.47393	3.47393
21139599	-2.86374	0.684895	0.406811	0.21158	-0.176024	0.0714206	0.672172	0.66528	0.641324	-0.320953	21139599	Anti-EBV	0.787708	9.60383e-06	0.787708	0.787708	0.787708
7173845	-2.82559	0.538403	0.406426	0.161121	0.0627348	0.241939	0.526423	0.594654	0.630231	-0.658415	7173845	Anti-EBV	1.17769	5.61341e-05	1.17769	1.17769	1.17769
102197	-2.82559	0.538403	0.406426	0.161121	0.0627348	0.241939	0.526423	0.594654	0.630231	-0.116421	102197	Anti-EBV	0.800624	1.11449e-05	0.800624	0.800624	0.800624
46874491	-2.82559	0.538403	0.406426	0.161121	0.0627348	0.241939	0.526423	0.594654	0.630231	-0.116421	46874491	Anti-EBV	0.800624	1.11449e-05	0.800624	0.800624	0.800624
45358303	-2.82559	0.538403	0.406426	0.161121	0.0627348	0.241939	0.526423	0.594654	0.630231	-0.116421	45358303	Anti-EBV	0.800624	1.11449e-05	0.800624	0.800624	0.800624
44629881	-2.82559	0.538403	0.406426	0.161121	0.0627348	0.241939	0.526423	0.594654	0.630231	-0.116421	44629881	Anti-EBV	0.800624	1.11449e-05	0.800624	0.800624	0.800624
45357254	-2.82559	0.538403	0.406426	0.161121	0.0627348	0.241939	0.526423	0.594654	0.630231	-0.116421	45357254	Anti-EBV	0.800624	1.11449e-05	0.800624	0.800624	0.800624
21797130	-2.82559	0.538403	0.406426	0.161121	0.0627348	0.241939	0.526423	0.594654	0.630231	-0.116421	21797130	Anti-EBV	0.800624	1.11449e-05	0.800624	0.800624	0.800624
3012227	-2.80528	0.614953	0.481377	0.300293	0.920894	0.770014	0.6302	0.741571	0.706713	-0.116421	3012227	Anti-EBV	1.25268	6.50809e-05	1.25268	1.25268	1.25268
464373	-2.8022	0.540052	0.405948	0.418873	-0.203144	0.162284	0.366243	0.798193	0.664245	-2.30111	464373	Anti-EBV	6.62806	0.000706433	6.62806	6.62806	6.62806
3061100	-2.79804	0.875121	0.393212	0.1562	0.389285	0.307876	0.474269	0.408371	0.487846	-0.0463847	3061100	Anti-EBV	0.931014	2.67021e-05	0.931014	0.931014	0.931014
50989994	-2.79804	0.875121	0.393212	0.1562	0.389285	0.307876	0.474269	0.408371	0.487846	-1.44052	50989994	Anti-EBV	2.6133	0.00022742	2.6133	2.6133	2.6133
492561	-2.75684	0.362929	0.384547	0.126029	2.44933	0.362675	0.548337	0.405705	0.445222	-1.44052	492561	Anti-EBV	4.88619	0.000498605	4.88619	4.88619	4.88619
21815879	-2.74537	0.391564	0.440064	0.167975	0.533011	0.277791	0.525683	0.688754	0.648943	-1.95805	21815879	Anti-EBV	5.18156	0.000533846	5.18156	5.18156	5.18156
3007217	-2.71065	0.587263	0.372588	0.146579	0.382312	0.0656288	0.44676	0.927704	0.789465	-0.638468	3007217	Anti-EBV	1.40375	8.31059e-05	1.40375	1.40375	1.40375
21116879	-2.70582	0.71257	0.406526	0.269758	-0.0880225	0.0426122	0.668902	0.646981	0.831407	-0.76835	21116879	Anti-EBV	1.20369	5.92356e-05	1.20369	1.20369	1.20369
7065210	-2.70582	0.71257	0.406526	0.269758	-0.0880225	0.0426122	0.668902	0.646981	0.831407	-0.167351	7065210	Anti-EBV	0.751298	5.25965e-06	0.751298	0.751298	0.751298
93003	-2.70582	0.71257	0.406526	0.269758	-0.0880225	0.0426122	0.668902	0.646981	0.831407	-0.167351	93003	Anti-EBV	0.751298	5.25965e-06	0.751298	0.751298	0.751298
44629860	-2.70582	0.71257	0.406526	0.269758	-0.0880225	0.0426122	0.668902	0.646981	0.831407	-0.167351	44629860	Anti-EBV	0.751298	5.25965e-06	0.751298	0.751298	0.751298
11098172	-2.68515	0.712924	0.428578	0.269758	-0.0809694	0.0426122	0.6536	0.657318	0.83122	-0.167351	11098172	Anti-EBV	0.755622	5.77561e-06	0.755622	0.755622	0.755622
350834	-2.68015	0.530768	0.417657	0.21071	-0.406354	0.0587678	0.70337	0.619886	0.811999	-0.167351	350834	Hydrogel	0.855752	1.77224e-05	0.855752	0.855752	0.855752
6481604	-2.67782	0.776285	0.429706	0.281801	0.263963	0.219386	0.67323	0.662806	0.701058	-1.4668	6481604	Anti-EBV	2.72824	0.000241135	2.72824	2.72824	2.72824
10565387	-2.67587	0.722939	0.442602	0.274417	-0.10421	0.041678	0.654964	0.653726	0.831184	-0.157738	10565387	Anti-EBV	0.737165	3.5734e-06	0.737165	0.737165	0.737165
10946143	-2.67266	0.714033	0.437166	0.274417	-0.0809694	0.0426122	0.655316	0.644075	0.83146	-0.167351	10946143	Anti-EBV	0.755864	5.80445e-06	0.755864	0.755864	0.755864
126968624	-2.67255	0.550134	0.401947	0.36741	-0.127054	0.255612	0.545565	0.693903	0.661949	-0.167351	126968624	Anti-EBV	0.729851	2.70076e-06	0.729851	0.729851	0.729851
21854299	-2.67255	0.550134	0.401947	0.36741	-0.127054	0.255612	0.545565	0.693903	0.661949	-0.270053	21854299	Anti-EBV	0.791277	1.00297e-05	0.791277	0.791277	0.791277
130712	-2.66528	0.492751	0.348584	0.278369	-0.0876276	0.0169172	0.48992	0.570289	0.812399	-0.270053	130712	Anti-EBV	0.814811	1.28376e-05	0.814811	0.814811	0.814811
57346774	-2.66187	0.52361	0.361599	0.233206	-0.335856	0.0882348	0.445494	0.582342	0.829933	-0.783874	57346774	Anti-EBV	1.04448	4.02396e-05	1.04448	1.04448	1.04448
6478491	-2.66118	0.73002	0.4391	0.426293	0.240926	0.161589	0.669932	0.605124	0.66167	-0.497957	6478491	Anti-EBV	1.19015	5.76199e-05	1.19015	1.19015	1.19015
456109	-2.64299	0.857727	0.31043	0.140179	0.806646	0.0386272	0.299811	0.218732	0.661445	-0.779539	456109	Anti-EBV	1.91088	0.000143613	1.91088	1.91088	1.91088
10517504	-2.63397	0.719348	0.438793	0.274417	-0.0809694	0.0426122	0.657299	0.640545	0.831043	-0.349427	10517504	Anti-EBV	0.873286	1.98144e-05	0.873286	0.873286	0.873286
10380149	-2.62969	0.900683	0.33547	0.188414	0.531401	0.179638	0.331199	0.549956	0.548211	-0.167351	10380149	Anti-EBV	1.10842	4.7869e-05	1.10842	1.10842	1.10842
121486870	-2.62328	0.401964	0.317701	0.0268421	-0.621539	0.0160755	0.485478	0.32114	0.661626	-1.08149	121486870	Anti-EBV	1.12899	5.03235e-05	1.12899	1.12899	1.12899
584362	-2.60311	0.422303	0.369107	0.251653	-1.30087	0.118947	0.581675	0.716759	0.789132	-0.938166	584362	Hydrogel	1.10098	4.69815e-05	1.10098	1.10098	1.10098
10686845	-2.58883	0.411788	0.424818	0.349418	0.0514482	0.0487364	0.489576	0.561469	0.642577	-1.07434	10686845	Anti-EBV	1.75834	0.000125412	1.75834	1.75834	1.75834
72212339	-2.58486	0.49689	0.417945	0.185186	-0.979943	0.125845	0.699806	0.518512	0.60926	-2.27857	72212339	Anti-EBV	6.70269	0.000715337	6.70269	6.70269	6.70269
11162398	-2.57007	0.896393	0.408393	0.480939	0.341464	0.0870466	0.440283	0.599964	0.802844	-1.24506	11162398	Anti-EBV	2.40041	0.00020202	2.40041	2.40041	2.40041
10934996	-2.56718	0.573728	0.397306	0.100915	0.267204	0.24434	0.588141	0.526659	0.798458	-1.44743	10934996	Anti-EBV	2.87262	0.00025836	2.87262	2.87262	2.87262
92132092	-2.56718	0.573728	0.397306	0.100915	0.267204	0.24434	0.588141	0.526659	0.798458	0.068736	92132092	Anti-EBV	0.813584	1.26912e-05	0.813584	0.813584	0.813584
334830	-2.56718	0.573728	0.397306	0.100915	0.267204	0.24434	0.588141	0.526659	0.798458	0.068736	334830	Anti-EBV	0.813584	1.26912e-05	0.813584	0.813584	0.813584
512555	-2.5564	0.571285	0.381273	0.0610535	-0.080252	0.310217	0.487331	0.707421	0.8289	0.068736	512555	Hydrogel	0.792194	1.01391e-05	0.792194	0.792194	0.792194
71431122	-2.54692	0.239558	0.35919	0.152695	-0.514699	0.0490639	0.551088	0.71021	0.776476	-1.24489	71431122	Anti-EBV	1.50019	9.46123e-05	1.50019	1.50019	1.50019
126969176	-2.54692	0.239558	0.35919	0.152695	-0.514699	0.0490639	0.551088	0.71021	0.776476	-1.55204	126969176	Anti-EBV	2.18165	0.000175919	2.18165	2.18165	2.18165
131887892	-2.54086	0.752009	0.396509	0.371957	0.693154	0.559061	0.299043	0.625319	0.447364	-1.55204	131887892	Anti-EBV	3.91812	0.000383102	3.91812	3.91812	3.91812
131880518	-2.5366	0.433564	0.38516	0.215805	-0.666661	0.452135	0.567262	0.803447	0.785379	-0.701374	131880518	Anti-EBV	0.733851	3.17807e-06	0.733851	0.733851	0.733851
66524133	-2.53252	0.0578938	0.312821	0.256038	-0.16755	0.0454837	0.451443	0.39441	0.547156	-0.649099	66524133	Anti-EBV	1.06868	4.31275e-05	1.06868	1.06868	1.06868
163285340	-2.52784	0.289651	0.426958	0.144175	0.217545	0.125536	0.583042	0.561539	0.61077	-0.448008	163285340	Anti-EBV	1.15965	5.39814e-05	1.15965	1.15965	1.15965
71314761	-2.52219	0.612991	0.423882	0.183194	-0.0957929	0.094045	0.561934	0.56141	0.59178	-0.148041	71314761	Anti-EBV	0.738225	3.69995e-06	0.738225	0.738225	0.738225
469442	-2.50739	0.633647	0.404089	0.394059	-0.656349	0.11604	0.351715	0.50989	0.50403	-0.03833	469442	Hydrogel	1.17927	5.63221e-05	1.17927	1.17927	1.17927
466018	-2.50713	0.785048	0.439703	0.2181	0.117957	0.245828	0.601612	0.550992	0.54377	-1.05814	466018	Anti-EBV	1.85496	0.00013694	1.85496	1.85496	1.85496
54101611	-2.50127	0.613299	0.374879	0.143445	1.10744	0.0467198	0.433574	0.356146	0.833755	-1.20595	54101611	Anti-EBV	3.2328	0.000301335	3.2328	3.2328	3.2328
10220985	-2.50127	0.613299	0.374879	0.143445	1.10744	0.0467198	0.433574	0.356146	0.833755	-0.00166173	10220985	Anti-EBV	1.3346	7.48555e-05	1.3346	1.3346	1.3346
6441200	-2.50127	0.613299	0.374879	0.143445	1.10744	0.0467198	0.433574	0.356146	0.833755	-0.00166173	6441200	Anti-EBV	1.3346	7.48555e-05	1.3346	1.3346	1.3346
14803093	-2.50127	0.613299	0.374879	0.143445	1.10744	0.0467198	0.433574	0.356146	0.833755	-0.00166173	14803093	Anti-EBV	1.3346	7.48555e-05	1.3346	1.3346	1.3346
118989478	-2.50127	0.613299	0.374879	0.143445	1.10744	0.0467198	0.433574	0.356146	0.833755	-0.00166173	118989478	Anti-EBV	1.3346	7.48555e-05	1.3346	1.3346	1.3346
54101612	-2.50127	0.613299	0.374879	0.143445	1.10744	0.0467198	0.433574	0.356146	0.833755	-0.00166173	54101612	Anti-EBV	1.3346	7.48555e-05	1.3346	1.3346	1.3346
129653012	-2.49969	0.13616	0.333782	0.033302	-0.456862	0.146404	0.605383	0.602437	0.725012	-0.00166173	129653012	Hydrogel	1.02223	3.7585e-05	1.02223	1.02223	1.02223
94480465	-2.48791	0.563349	0.400188	0.340872	-0.453054	0.151756	0.445001	0.745267	0.657021	-1.71809	94480465	Anti-EBV	3.031	0.000277257	3.031	3.031	3.031
9882803	-2.48791	0.563349	0.400188	0.340872	-0.453054	0.151756	0.445001	0.745267	0.657021	0.0881802	9882803	Hydrogel	1.08325	4.48662e-05	1.08325	1.08325	1.08325
10471224	-2.46558	0.685045	0.375726	0.260345	-0.0577741	0.0636652	0.392699	0.841213	0.813564	0.0881802	10471224	Hydrogel	0.792828	1.02147e-05	0.792828	0.792828	0.792828
72201	-2.4571	0.839715	0.403885	0.23965	0.340305	0.681764	0.253931	0.644217	0.420984	-0.596755	72201	Anti-EBV	1.41944	8.49772e-05	1.41944	1.41944	1.41944
14485380	-2.4571	0.839715	0.403885	0.23965	0.340305	0.681764	0.253931	0.644217	0.420984	-2.05449	14485380	Anti-EBV	9.11858	0.00100358	9.11858	9.11858	9.11858
100327	-2.45452	0.749552	0.376598	0.184366	0.125533	0.0847179	0.545538	0.537044	0.813722	-2.05449	100327	Anti-EBV	8.41368	0.00091948	8.41368	8.41368	8.41368
324309	-2.45452	0.749552	0.376598	0.184366	0.125533	0.0847179	0.545538	0.537044	0.813722	-0.362474	324309	Anti-EBV	1.03699	3.93464e-05	1.03699	1.03699	1.03699
5273014	-2.44459	0.806568	0.365679	0.037013	0.152139	0.124585	0.458498	0.328645	0.760507	-0.362474	5273014	Anti-EBV	1.05663	4.16903e-05	1.05663	1.05663	1.05663
13072932	-2.43014	0.274439	0.378793	0.138744	0.23567	0.118457	0.587143	0.590731	0.616112	-0.115818	13072932	Anti-EBV	0.921885	2.56129e-05	0.921885	0.921885	0.921885
40468020	-2.43014	0.274439	0.378793	0.138744	0.23567	0.118457	0.587143	0.590731	0.616112	-0.148041	40468020	Anti-EBV	0.944886	2.83573e-05	0.944886	0.944886	0.944886
68197667	-2.43014	0.274439	0.378793	0.138744	0.23567	0.118457	0.587143	0.590731	0.616112	-0.148041	68197667	Anti-EBV	0.944886	2.83573e-05	0.944886	0.944886	0.944886
42553747	-2.43014	0.274439	0.378793	0.138744	0.23567	0.118457	0.587143	0.590731	0.616112	-0.148041	42553747	Anti-EBV	0.944886	2.83573e-05	0.944886	0.944886	0.944886
54669720	-2.43014	0.274439	0.378793	0.138744	0.23567	0.118457	0.587143	0.590731	0.616112	-0.148041	54669720	Anti-EBV	0.944886	2.83573e-05	0.944886	0.944886	0.944886
16129586	-2.43014	0.274439	0.378793	0.138744	0.23567	0.118457	0.587143	0.590731	0.616112	-0.148041	16129586	Anti-EBV	0.944886	2.83573e-05	0.944886	0.944886	0.944886
53869019	-2.43014	0.274439	0.378793	0.138744	0.23567	0.118457	0.587143	0.590731	0.616112	-0.148041	53869019	Anti-EBV	0.944886	2.83573e-05	0.944886	0.944886	0.944886
3367	-2.43014	0.274439	0.378793	0.138744	0.23567	0.118457	0.587143	0.590731	0.616112	-0.148041	3367	Anti-EBV	0.944886	2.83573e-05	0.944886	0.944886	0.944886
13072931	-2.43014	0.274439	0.378793	0.138744	0.23567	0.118457	0.587143	0.590731	0.616112	-0.148041	13072931	Anti-EBV	0.944886	2.83573e-05	0.944886	0.944886	0.944886
44629914	-2.43014	0.274439	0.378793	0.138744	0.23567	0.118457	0.587143	0.590731	0.616112	-0.148041	44629914	Anti-EBV	0.944886	2.83573e-05	0.944886	0.944886	0.944886
154716223	-2.43014	0.274439	0.387145	0.138744	0.23567	0.118457	0.583042	0.592274	0.616112	-0.148041	154716223	Anti-EBV	0.944886	2.83573e-05	0.944886	0.944886	0.944886
46705411	-2.43014	0.274439	0.378793	0.138744	0.23567	0.118457	0.587143	0.590731	0.616112	-0.148041	46705411	Anti-EBV	0.944886	2.83573e-05	0.944886	0.944886	0.944886
45039261	-2.43014	0.274439	0.378793	0.138744	0.23567	0.118457	0.587143	0.590731	0.616112	-0.148041	45039261	Anti-EBV	0.944886	2.83573e-05	0.944886	0.944886	0.944886
503813	-2.42787	0.688188	0.36115	0.118707	0.670497	0.194074	0.493747	0.504608	0.4879	-0.148041	503813	Anti-EBV	1.21485	6.05676e-05	1.21485	1.21485	1.21485
131881042	-2.40871	0.499936	0.41459	0.396035	-0.978875	0.241144	0.462904	0.42838	0.583633	-1.16666	131881042	Anti-EBV	0.920915	2.54971e-05	0.920915	0.920915	0.920915
470053	-2.40265	0.912685	0.444502	0.225283	0.483475	0.156854	0.63137	0.322715	0.51611	0.135966	470053	Anti-EBV	0.900692	2.30843e-05	0.900692	0.900692	0.900692
10946114	-2.40008	0.622872	0.348351	0.237404	-0.65961	0.0488172	0.556913	0.600654	0.71437	-1.86359	10946114	Anti-EBV	3.88075	0.000378643	3.88075	3.88075	3.88075
134229959	-2.39991	0.263062	0.422868	0.210613	0.797268	0.542374	0.723138	0.901586	0.807913	-0.315231	134229959	Anti-EBV	1.4618	9.00316e-05	1.4618	1.4618	1.4618
7043952	-2.3919	0.67823	0.38796	0.0681322	0.757792	0.0923804	0.680607	0.359386	0.841827	-0.50329	7043952	Anti-EBV	1.65141	0.000112654	1.65141	1.65141	1.65141
6595184	-2.3919	0.67823	0.38796	0.0681322	0.757792	0.0923804	0.680607	0.359386	0.841827	-0.152357	6595184	Anti-EBV	1.28183	6.85594e-05	1.28183	1.28183	1.28183
355280	-2.39011	0.559625	0.421514	0.106651	0.403926	0.12482	0.488996	0.485005	0.859849	-0.152357	355280	Anti-EBV	1.05866	4.19318e-05	1.05866	1.05866	1.05866
121487874	-2.38568	0.912559	0.431978	0.0260295	0.755912	0.307001	0.44472	0.702356	0.800748	-0.717902	121487874	Anti-EBV	1.95683	0.000149095	1.95683	1.95683	1.95683
128771	-2.38303	0.446644	0.365937	0.133309	-1.48785	0.116961	0.563267	0.526368	0.625517	-1.08763	128771	Hydrogel	1.33935	7.54222e-05	1.33935	1.33935	1.33935
15926748	-2.37715	0.430835	0.382658	0.151751	-0.144993	0.143788	0.559954	0.505376	0.492748	-0.757752	15926748	Anti-EBV	1.24222	6.38326e-05	1.24222	1.24222	1.24222
15926749	-2.37715	0.430835	0.382658	0.151751	-0.144993	0.143788	0.559954	0.505376	0.492748	-0.897575	15926749	Anti-EBV	1.42643	8.58117e-05	1.42643	1.42643	1.42643
71341063	-2.37033	0.454146	0.386625	0.240791	0.321627	0.141108	0.404335	0.636883	0.816398	-0.897575	71341063	Anti-EBV	1.87783	0.000139669	1.87783	1.87783	1.87783
10356486	-2.37033	0.454146	0.386625	0.240791	0.321627	0.141108	0.404335	0.636883	0.816398	-0.342711	10356486	Anti-EBV	1.17046	5.52708e-05	1.17046	1.17046	1.17046
10265867	-2.37033	0.454146	0.386625	0.240791	0.321627	0.141108	0.404335	0.636883	0.816398	-0.342711	10265867	Anti-EBV	1.17046	5.52708e-05	1.17046	1.17046	1.17046
67785972	-2.37033	0.454146	0.386625	0.240791	0.321627	0.141108	0.404335	0.636883	0.816398	-0.342711	67785972	Anti-EBV	1.17046	5.52708e-05	1.17046	1.17046	1.17046
481530	-2.36399	0.773024	0.38839	0.307085	0.571869	0.0873457	0.309937	0.867932	0.521074	-0.342711	481530	Anti-EBV	1.347	7.63342e-05	1.347	1.347	1.347
121487869	-2.3625	0.878526	0.41734	0.380037	1.70816	0.341795	0.525081	0.794942	0.654348	-0.773693	121487869	Anti-EBV	2.9162	0.00026356	2.9162	2.9162	2.9162
511720	-2.33725	0.713899	0.448036	0.169666	2.29748	0.257915	0.587447	0.594075	0.669136	-0.86109	511720	Anti-EBV	3.73309	0.000361025	3.73309	3.73309	3.73309
11808175	-2.33241	0.658558	0.348817	0.0171237	0.409013	0.0338777	0.446123	0.29291	0.850978	-2.38027	11808175	Anti-EBV	81.6961	0.00966301	81.6961	81.6961	81.6961
98140	-2.33241	0.658558	0.348817	0.0171237	0.409013	0.0338777	0.446123	0.29291	0.850978	-0.378474	98140	Anti-EBV	1.27706	6.799e-05	1.27706	1.27706	1.27706
11832914	-2.33241	0.658558	0.348817	0.0171237	0.409013	0.0338777	0.446123	0.29291	0.850978	-0.378474	11832914	Anti-EBV	1.27706	6.799e-05	1.27706	1.27706	1.27706
482505	-2.33241	0.658558	0.348817		0.409013	0.0338777	0.446123	0.29291	0.850978	-0.378474	482505	Anti-EBV	1.27706	6.799e-05	1.27706	1.27706	1.27706
11087275	-2.33241	0.658558	0.348817	0.0171237	0.409013	0.0338777	0.446123	0.29291	0.850978	-0.378474	11087275	Anti-EBV	1.27706	6.799e-05	1.27706	1.27706	1.27706
504751	-2.32986	0.689105	0.430368	0.296756	1.9878	0.083126	0.507116	0.901196	0.709486	-0.378474	504751	Anti-EBV	2.42199	0.000204594	2.42199	2.42199	2.42199
92236361	-2.3259	0.379742	0.3804	0.211584	1.73223	0.0493117	0.536905	0.526668	0.737365	-0.4527	92236361	Anti-EBV	2.35665	0.000196799	2.35665	2.35665	2.35665
490627	-2.30948	0.461997	0.386202	0.470336	0.368685	0.184023	0.61869	0.733306	0.680281	-1.30964	490627	Anti-EBV	3.08094	0.000283216	3.08094	3.08094	3.08094
512128	-2.30693	0.816795	0.425009	0.117328	-0.269367	0.0604387	0.503839	0.688578	0.859731	-0.659862	512128	Anti-EBV	1.04239	3.99905e-05	1.04239	1.04239	1.04239
94001662	-2.30442	0.533698	0.363151	0.181935	-0.555839	0.087272	0.511162	0.644924	0.800913	-0.465664	94001662	Hydrogel	0.780032	8.68799e-06	0.780032	0.780032	0.780032
91810866	-2.30442	0.533698	0.363151	0.181935	-0.555839	0.087272	0.511162	0.644924	0.800913	-0.361862	91810866	Hydrogel	0.863984	1.87046e-05	0.863984	0.863984	0.863984
13108018	-2.30442	0.533698	0.363151	0.181935	-0.555839	0.087272	0.511162	0.644924	0.800913	-0.361862	13108018	Hydrogel	0.863984	1.87046e-05	0.863984	0.863984	0.863984
24206417	-2.30442	0.533698	0.363151	0.181935	-0.555839	0.087272	0.511162	0.644924	0.800913	-0.361862	24206417	Hydrogel	0.863984	1.87046e-05	0.863984	0.863984	0.863984
134695307	-2.30442	0.533698	0.363151	0.181935	-0.555839	0.087272	0.511162	0.644924	0.800913	-0.361862	134695307	Hydrogel	0.863984	1.87046e-05	0.863984	0.863984	0.863984
1268279	-2.30442	0.533698	0.363151	0.181935	-0.555839	0.087272	0.511162	0.644924	0.800913	-0.361862	1268279	Hydrogel	0.863984	1.87046e-05	0.863984	0.863984	0.863984
5327118	-2.30442	0.533698	0.363151	0.181935	-0.555839	0.087272	0.511162	0.644924	0.800913	-0.361862	5327118	Hydrogel	0.863984	1.87046e-05	0.863984	0.863984	0.863984
13463	-2.30442	0.533698	0.363151	0.181935	-0.555839	0.087272	0.511162	0.644924	0.800913	-0.361862	13463	Hydrogel	0.863984	1.87046e-05	0.863984	0.863984	0.863984
131852786	-2.29084	0.417008	0.420019	0.117386	-0.343051	0.10816	0.586148	0.607967	0.586446	-0.361862	131852786	Anti-EBV	0.720893	1.63195e-06	0.720893	0.720893	0.720893
53908939	-2.28889	0.242173	0.347453	0.0525024	-0.648931	0.266636	0.443126	0.410678	0.744834	0.27848	53908939	Hydrogel	1.50684	9.54057e-05	1.50684	1.50684	1.50684
6479249	-2.2816	0.209508	0.38729	0.22461	1.28434	0.068761	0.36969	0.0840009	0.434516	-1.14139	6479249	Anti-EBV	3.71569	0.00035895	3.71569	3.71569	3.71569
131858702	-2.27772	0.554447	0.401712	0.404065	2.21448	0.295172	0.275421	0.942004	0.843631	-1.558	131858702	Anti-EBV	8.11965	0.000884399	8.11965	8.11965	8.11965
484807	-2.27662	0.694647	0.422526	0.289051	0.279553	0.59986	0.389941	0.941074	0.821811	1.31115	484807	Hydrogel	1.27783	6.80822e-05	1.27783	1.27783	1.27783
472636	-2.27459	0.642501	0.391568	0.0969709	-0.156955	0.126401	0.78348	0.72513	0.692044	-1.09725	472636	Anti-EBV	1.83656	0.000134746	1.83656	1.83656	1.83656
260138	-2.26886	0.299348	0.365103	0.154608	0.820758	0.205333	0.58952	0.563192	0.775207	-0.421125	260138	Anti-EBV	1.6576	0.000113394	1.6576	1.6576	1.6576
121217040	-2.26886	0.299348	0.365103	0.154608	0.820758	0.205333	0.58952	0.563192	0.775207	0.0885377	121217040	Anti-EBV	1.14636	5.2396e-05	1.14636	1.14636	1.14636
126916	-2.2667	0.488288	0.393429	0.084563	-0.0831822	0.150373	0.47933	0.429496	0.647131	0.0885377	126916	Hydrogel	0.81832	1.32563e-05	0.81832	0.81832	0.81832
490444	-2.24774	0.0367586	0.348472	0.0886506	0.335755	0.0856121	0.615583	0.552155	0.790739	-0.416504	490444	Anti-EBV	1.28805	6.93007e-05	1.28805	1.28805	1.28805
512679	-2.24538	0.671779	0.419861	0.168225	0.409773	0.352251	0.414237	0.666123	0.680914	-1.11372	512679	Anti-EBV	2.61096	0.000227141	2.61096	2.61096	2.61096
273017	-2.24317	0.538794	0.395297	0.131596	0.494882	0.246525	0.435355	0.483075	0.597143	-1.58555	273017	Anti-EBV	5.18095	0.000533774	5.18095	5.18095	5.18095
21121551	-2.23632	0.0935442	0.397705	0.0766589	1.65602	0.0678227	0.470942	0.864492	0.828714	-0.92026	21121551	Anti-EBV	3.4755	0.000330292	3.4755	3.4755	3.4755
138114911	-2.22821	0.678566	0.384997	0.314103	0.759767	0.0900003	0.489642	0.934975	0.542547	-0.555802	138114911	Anti-EBV	1.81956	0.000132717	1.81956	1.81956	1.81956
6483431	-2.22821	0.678566	0.384997	0.314103	0.759767	0.0900003	0.489642	0.934975	0.542547	0.508677	6483431	Anti-EBV	0.836847	1.54668e-05	0.836847	0.836847	0.836847
11243974	-2.21112	0.502292	0.421752	0.149945	-0.0240379	0.188652	0.553411	0.523292	0.620017	0.508677	11243974	Hydrogel	1.05156	4.10852e-05	1.05156	1.05156	1.05156
12907243	-2.20943	0.433731	0.370954	0.109753	0.432011	0.074163	0.117845	0.031823	0.559657	0.508677	12907243	Hydrogel	0.748149	4.88395e-06	0.748149	0.748149	0.748149
47751	-2.20943	0.433731	0.370954	0.109753	0.432011	0.074163	0.117845	0.031823	0.559657	0.508677	47751	Hydrogel	0.748149	4.88395e-06	0.748149	0.748149	0.748149
134714751	-2.20943	0.433731	0.370954	0.109753	0.432011	0.074163	0.117845	0.031823	0.559657	-0.888448	134714751	Anti-EBV	2.12073	0.000168651	2.12073	2.12073	2.12073
1265902	-2.20943	0.433731	0.370954	0.109753	0.432011	0.074163	0.117845	0.031823	0.559657	-0.888448	1265902	Anti-EBV	2.12073	0.000168651	2.12073	2.12073	2.12073
44629846	-2.20943	0.433731	0.370954	0.109753	0.432011	0.074163	0.117845	0.031823	0.559657	-0.754955	44629846	Anti-EBV	1.8612	0.000137685	1.8612	1.8612	1.8612
45357134	-2.20943	0.433731	0.370954	0.109753	0.432011	0.074163	0.117845	0.031823	0.559657	0.210708	45357134	Anti-EBV	0.836421	1.54159e-05	0.836421	0.836421	0.836421
121487870	-2.20872	0.887934	0.431951	0.367545	1.8877	0.356166	0.593677	0.707366	0.684553	0.210708	121487870	Anti-EBV	1.68734	0.000116941	1.68734	1.68734	1.68734
13989347	-2.20288	0.212603	0.382264	0.280804	0.24432	0.0817345	0.57211	0.615861	0.575741	0.210708	13989347	Anti-EBV	0.726797	2.33639e-06	0.726797	0.726797	0.726797
57368267	-2.20288	0.212603	0.382264	0.280804	0.24432	0.0817345	0.57211	0.615861	0.575741	0.210708	57368267	Anti-EBV	0.726797	2.33639e-06	0.726797	0.726797	0.726797
464374	-2.19885	0.546017	0.418582	0.41307	-0.569037	0.224751	0.457851	0.493445	0.644055	0.210708	464374	Hydrogel	1.38369	8.07126e-05	1.38369	1.38369	1.38369
7458588	-2.19622	0.514461	0.385026	0.0740992	0.636762	0.278337	0.603099	0.45287	0.666569	0.210708	7458588	Anti-EBV	0.957433	2.98542e-05	0.957433	0.957433	0.957433
7058183	-2.19622	0.514461	0.385026	0.0740992	0.636762	0.278337	0.603099	0.45287	0.666569	-0.56013	7058183	Anti-EBV	1.74167	0.000123424	1.74167	1.74167	1.74167
22861745	-2.19578	0.0678562	0.437401	0.0367261	-1.72753	0.0168263	0.664045	0.148446	0.557391	-0.0694335	22861745	Hydrogel	5.71467	0.000597453	5.71467	5.71467	5.71467
490440	-2.19491	0.172426	0.291888	0.037302	-0.158389	0.101006	0.56015	0.553435	0.806562	-0.0694335	490440	Hydrogel	0.768875	7.35684e-06	0.768875	0.768875	0.768875
9925859	-2.19282	0.623858	0.383101	0.153631	0.815925	0.084728	0.386164	0.234311	0.821967	-0.237739	9925859	Anti-EBV	1.46927	9.09225e-05	1.46927	1.46927	1.46927
102381544	-2.19071	0.242695	0.417095	0.283923	-0.410297	0.310623	0.655036	0.966913	0.817706	0.0588776	102381544	Hydrogel	1.07977	4.44507e-05	1.07977	1.07977	1.07977
68742335	-2.1841	0.227125	0.369242	0.133046	0.0466492	0.0744341	0.570352	0.530072	0.574906	0.0588776	68742335	Hydrogel	0.714855	9.11524e-07	0.714855	0.714855	0.714855
11173824	-2.17822	0.531032	0.415172	0.346778	1.12145	0.316808	0.4778	0.9354	0.854221	-2.31399	11173824	Anti-EBV	35.0732	0.0041003	35.0732	35.0732	35.0732
92237060	-2.17727	0.635439	0.395794	0.541616	0.159986	0.194628	0.704221	0.891069	0.824177	-0.666335	92237060	Anti-EBV	1.48052	9.22652e-05	1.48052	1.48052	1.48052
97453	-2.17727	0.635439	0.395794	0.541616	0.159986	0.194628	0.704221	0.891069	0.824177	-0.250384	97453	Anti-EBV	1.00829	3.59216e-05	1.00829	1.00829	1.00829
5494430	-2.17536	0.720482	0.390919	0.0811413	-0.257492	0.260025	0.402818	0.435115	0.637822	-1.06282	5494430	Anti-EBV	1.73079	0.000122125	1.73079	1.73079	1.73079
393545	-2.17518	0.04814	0.436903	0.11826	-1.4371	0.00887031	0.656156	0.162775	0.608698	-0.346854	393545	Hydrogel	2.79604	0.000249224	2.79604	2.79604	2.79604
69527463	-2.17225	0.890621	0.379858	0.278531	0.67728	0.116165	0.533292	0.573942	0.784852	-0.656041	69527463	Anti-EBV	1.95072	0.000148366	1.95072	1.95072	1.95072
504749	-2.16387	0.279887	0.443299	0.440961	-0.417254	0.659655	0.574846	0.811677	0.641568	-0.334093	504749	Hydrogel	0.774435	8.02023e-06	0.774435	0.774435	0.774435
92301827	-2.15572	0.572374	0.405844	0.0883641	0.784476	0.276115	0.475507	0.710037	0.855214	-0.334093	92301827	Anti-EBV	1.57549	0.000103597	1.57549	1.57549	1.57549
6482628	-2.15572	0.572374	0.405844	0.0883641	0.784476	0.276115	0.475507	0.710037	0.855214	0.382827	6482628	Anti-EBV	0.930859	2.66836e-05	0.930859	0.930859	0.930859
49784135	-2.15192	0.371607	0.398221	0.340245	0.00760722	0.254528	0.696706	0.962013	0.831267	-2.286	49784135	Anti-EBV	23.4831	0.00271746	23.4831	23.4831	23.4831
472638	-2.14824	0.398779	0.418098	0.0880242	1.15377	0.248829	0.310617	0.946707	0.864647	-0.42549	472638	Anti-EBV	2.00352	0.000154665	2.00352	2.00352	2.00352
472656	-2.14824	0.398779	0.418098	0.0880242	1.15377	0.248829	0.310617	0.946707	0.864647	-0.15399	472656	Anti-EBV	1.63449	0.000110636	1.63449	1.63449	1.63449
10588022	-2.14664	0.462648	0.357819	0.106297	0.463612	0.0334724	0.344877	0.357172	0.744791	0.208538	10588022	Anti-EBV	0.860266	1.8261e-05	0.860266	0.860266	0.860266
10588021	-2.14664	0.462648	0.357819	0.106297	0.463612	0.0334724	0.344877	0.357172	0.744791	0.208538	10588021	Anti-EBV	0.860266	1.8261e-05	0.860266	0.860266	0.860266
3011898	-2.1412	0.473449	0.398367	0.40877	-0.0663188	0.141488	0.566093	0.865529	0.808193	-0.928157	3011898	Anti-EBV	1.71185	0.000119866	1.71185	1.71185	1.71185
21821295	-2.12558	0.264205	0.400951	0.0949706	-0.722648	0.640316	0.53819	0.498775	0.662373	-1.43304	21821295	Anti-EBV	2.15772	0.000173064	2.15772	2.15772	2.15772
3012586	-2.12431	0.72429	0.431058	0.0772503	2.13845	0.457912	0.59533	0.415255	0.537123	-1.43304	3012586	Anti-EBV	8.01357	0.000871742	8.01357	8.01357	8.01357
121486770	-2.1232	0.343148	0.362763	0.0531908	2.23234	0.154202	0.430632	0.847291	0.808143	-0.0837087	121486770	Anti-EBV	2.31308	0.0001916	2.31308	2.31308	2.31308
131883271	-2.12294	0.678827	0.46407	0.319079	0.897009	0.204962	0.267837	0.692631	0.71682	-0.0837087	131883271	Anti-EBV	1.38723	8.11342e-05	1.38723	1.38723	1.38723
57116127	-2.12119	0.463594	0.381157	0.199019	0.176336	0.0313446	0.0789913	0.0163341	0.574368	-1.9251	57116127	Anti-EBV	15.8619	0.00180815	15.8619	15.8619	15.8619
6976932	-2.12119	0.463594	0.381157	0.199019	0.176336	0.0313446	0.0789913	0.0163341	0.574368	-0.439085	6976932	Anti-EBV	1.22451	6.17195e-05	1.22451	1.22451	1.22451
27556867	-2.12119	0.463594	0.381157	0.199019	0.176336	0.0313446	0.0789913	0.0163341	0.574368	-1.5092	27556867	Anti-EBV	4.60197	0.000464694	4.60197	4.60197	4.60197
15607330	-2.12119	0.463594	0.381157	0.199019	0.176336	0.0313446	0.0789913	0.0163341	0.574368	-1.65833	15607330	Anti-EBV	6.31251	0.000668784	6.31251	6.31251	6.31251
100551	-2.11308	0.500318	0.358258	0.0201783	0.449137	0.045297	0.193311	0.0388823	0.495433	-0.873344	100551	Anti-EBV	2.21569	0.000179981	2.21569	2.21569	2.21569
466022	-2.10758	0.757248	0.454963	0.219356	1.17054	0.178604	0.173134	0.559892	0.638014	-0.0299671	466022	Anti-EBV	1.52427	9.74855e-05	1.52427	1.52427	1.52427
10850803	-2.09047	0.5376	0.389319	0.181935	-0.449731	0.0837382	0.501438	0.648821	0.806987	-0.18325	10850803	Hydrogel	0.936789	2.73911e-05	0.936789	0.936789	0.936789
12939902	-2.08507	0.576346	0.41788	0.0918165	1.47686	0.355698	0.653328	0.646512	0.816944	-0.18325	12939902	Anti-EBV	1.94156	0.000147274	1.94156	1.94156	1.94156
12939901	-2.08507	0.576346	0.41788	0.0918165	1.47686	0.355698	0.653328	0.646512	0.816944	-0.18325	12939901	Anti-EBV	1.94156	0.000147274	1.94156	1.94156	1.94156
2777912	-2.08507	0.576346	0.41788	0.0918165	1.47686	0.355698	0.653328	0.646512	0.816944	-0.18325	2777912	Anti-EBV	1.94156	0.000147274	1.94156	1.94156	1.94156
44283163	-2.08507	0.576346	0.41788	0.0918165	1.47686	0.355698	0.653328	0.646512	0.816944	-0.203979	44283163	Anti-EBV	1.97075	0.000150756	1.97075	1.97075	1.97075
46783463	-2.08507	0.576346	0.41788	0.0918165	1.47686	0.355698	0.653328	0.646512	0.816944	-0.295578	46783463	Anti-EBV	2.10782	0.00016711	2.10782	2.10782	2.10782
96544	-2.08507	0.576346	0.41788	0.0918165	1.47686	0.355698	0.653328	0.646512	0.816944	-0.361862	96544	Anti-EBV	2.2161	0.000180029	2.2161	2.2161	2.2161
10521478	-2.08507	0.576346	0.41788	0.0918165	1.47686	0.355698	0.653328	0.646512	0.816944	-0.806645	10521478	Anti-EBV	3.23311	0.000301372	3.23311	3.23311	3.23311
7070208	-2.08507	0.576346	0.41788	0.0918165	1.47686	0.355698	0.653328	0.646512	0.816944	-0.806645	7070208	Anti-EBV	3.23311	0.000301372	3.23311	3.23311	3.23311
688019	-2.08507	0.576346	0.41788	0.0918165	1.47686	0.355698	0.653328	0.646512	0.816944	-0.806645	688019	Anti-EBV	3.23311	0.000301372	3.23311	3.23311	3.23311
90673794	-2.08381	0.317344	0.422848	0.113753	0.835082	0.362747	0.33704	0.636454	0.575733	-0.806645	90673794	Anti-EBV	2.52497	0.000216882	2.52497	2.52497	2.52497
299952	-2.07682	0.551872	0.419428	0.172839	0.0887512	0.468359	0.118539	0.5989	0.54042	-0.806645	299952	Anti-EBV	1.70403	0.000118932	1.70403	1.70403	1.70403
481082	-2.07002	0.495595	0.390437	0.0521426	0.360619	0.103267	0.519268	0.520511	0.838683	-0.806645	481082	Anti-EBV	2.01371	0.000155882	2.01371	2.01371	2.01371
10108316	-2.06909	0.239161	0.404227	0.188804	0.579332	0.359049	0.746581	0.947591	0.830128	-0.806645	10108316	Anti-EBV	2.25968	0.000185229	2.25968	2.25968	2.25968
6480510	-2.06838	0.169335	0.396367	0.130114	-0.697181	0.26969	0.756045	0.521846	0.821101	-0.806645	6480510	Anti-EBV	0.829789	1.46247e-05	0.829789	0.829789	0.829789
490628	-2.06804	0.675689	0.42168	0.460879	-0.103334	0.195826	0.560879	0.714342	0.65173	-0.806645	490628	Anti-EBV	1.49561	9.40651e-05	1.49561	1.49561	1.49561
196788	-2.06758	0.223549	0.370799	0.164918	0.475138	0.0232641	0.417079	0.833923	0.812508	-0.602045	196788	Anti-EBV	1.74655	0.000124006	1.74655	1.74655	1.74655
87824325	-2.06489	0.291088	0.350345	0.0467161	-0.458394	0.0466641	0.182672	0.860357	0.523607	-0.765496	87824325	Anti-EBV	1.04133	3.98645e-05	1.04133	1.04133	1.04133
5272658	-2.06399	0.862464	0.433313	0.226878	-0.673768	0.125153	0.598811	0.68358	0.658908	-1.07506	5272658	Anti-EBV	1.28096	6.84552e-05	1.28096	1.28096	1.28096
5273749	-2.05053	0.717421	0.350753	0.212992	0.428466	0.182095	0.168079	0.0339598	0.599395	-0.583139	5273749	Anti-EBV	1.68203	0.000116308	1.68203	1.68203	1.68203
5271377	-2.05053	0.717421	0.350753	0.212992	0.428466	0.182095	0.168079	0.0339598	0.599395	-1.78546	5271377	Anti-EBV	12.518	0.00140918	12.518	12.518	12.518
3009937	-2.04936	0.281457	0.433747	0.263052	2.53806	0.192517	0.58865	0.923077	0.808503	-0.637923	3009937	Anti-EBV	3.8893	0.000379663	3.8893	3.8893	3.8893
5271782	-2.03994	0.101051	0.355754	0.126184	-0.0273114	0.0430057	0.604099	0.686736	0.631314	-0.563742	5271782	Anti-EBV	1.221	6.13015e-05	1.221	1.221	1.221
73351959	-2.02882	0.824261	0.395194	0.313172	1.98534	0.366515	0.330905	0.909789	0.836319	-2.45339	73351959	Anti-EBV	14.0774	0.00159524	14.0774	14.0774	14.0774
155889717	-2.02714	0.415456	0.336403	0.16845	-0.0893713	0.384368	0.233664	0.0444887	0.509869	-0.493808	155889717	Anti-EBV	1.08012	4.44918e-05	1.08012	1.08012	1.08012
154706402	-2.02714	0.415456	0.336403	0.16845	-0.0893713	0.384368	0.233664	0.0444887	0.509869	-0.239141	154706402	Anti-EBV	0.82556	1.41201e-05	0.82556	0.82556	0.82556
5272659	-2.02499	0.680954	0.428046	0.146294	-0.953222	0.132327	0.666185	0.671964	0.665756	-0.239141	5272659	Hydrogel	1.64933	0.000112406	1.64933	1.64933	1.64933
76973629	-2.02446	0.445128	0.43185	0.109753	0.551825	0.0919064	0.117007	0.0431366	0.562601	-0.940471	76973629	Anti-EBV	2.65399	0.000232275	2.65399	2.65399	2.65399
92021270	-2.02322	0.437346	0.424932	0.423571	0.528988	0.441736	0.642317	0.935458	0.836112	-0.576406	92021270	Anti-EBV	1.78758	0.000128901	1.78758	1.78758	1.78758
44633776	-2.02322	0.437346	0.424932	0.423571	0.528988	0.441736	0.642317	0.935458	0.836112	0.82448	44633776	Hydrogel	0.870838	1.95223e-05	0.870838	0.870838	0.870838
3007216	-2.01466	0.150902	0.390521	0.335567	-0.00446045	0.269983	0.518496	0.934286	0.787066	-0.0476812	3007216	Anti-EBV	0.738176	3.6941e-06	0.738176	0.738176	0.738176
472657	-2.01035	0.330417	0.426707	0.068228	0.292338	0.169849	0.350886	0.692883	0.850903	-0.0476812	472657	Anti-EBV	0.952102	2.92182e-05	0.952102	0.952102	0.952102
472639	-2.01035	0.330417	0.426707	0.068228	0.292338	0.169849	0.350886	0.692883	0.850903	-0.528157	472639	Anti-EBV	1.48995	9.33909e-05	1.48995	1.48995	1.48995
162653200	-2.0077	0.810405	0.368941		0.306612	0.0253627	0.138209	0.046263	0.393513	0.210708	162653200	Anti-EBV	0.768239	7.28101e-06	0.768239	0.768239	0.768239
447199	-2.00763	0.634283	0.406177	0.0641366	-0.339707	0.0508675	0.480391	0.27031	0.859352	-1.46073	447199	Anti-EBV	3.60586	0.000345845	3.60586	3.60586	3.60586
10831407	-2.00533	0.63129	0.427942	0.195441	1.37584	0.284065	0.502131	0.68375	0.686497	-1.46073	10831407	Anti-EBV	8.07287	0.000878817	8.07287	8.07287	8.07287
131858477	-2.00415	0.496878	0.395108	0.212025	3.00042	0.369589	0.299399	0.922232	0.848133	-0.542081	131858477	Anti-EBV	4.13363	0.000408815	4.13363	4.13363	4.13363
131875471	-2.00044	0.565609	0.369311	0.12737	0.419485	0.0142443	0.051741	0.0289452	0.429387	-1.95273	131875471	Anti-EBV	71.0081	0.00838779	71.0081	71.0081	71.0081
91150325	-1.9994	0.624595	0.364791	0.364245	-0.350768	0.0690266	0.60577	0.796267	0.790237	-1.95273	91150325	Anti-EBV	49.2354	0.00579004	49.2354	49.2354	49.2354
6913230	-1.99873	0.59822	0.415175	0.169439	3.68263	0.277588	0.386978	0.464863	0.755078	0.0684978	6913230	Anti-EBV	3.17955	0.000294981	3.17955	3.17955	3.17955
3363163	-1.99873	0.59822	0.415175	0.169439	3.68263	0.277588	0.386978	0.464863	0.755078	-0.118144	3363163	Anti-EBV	3.56528	0.000341004	3.56528	3.56528	3.56528
503811	-1.99668	0.456361	0.342186	0.0474723	-0.17275	0.32829	0.400066	0.503428	0.460005	-0.346111	503811	Anti-EBV	0.855636	1.77086e-05	0.855636	0.855636	0.855636
459942	-1.99387	0.259385	0.392709	0.123759	-0.00658883	0.235458	0.502279	0.350898	0.63279	-0.0830449	459942	Anti-EBV	0.763687	6.73784e-06	0.763687	0.763687	0.763687
247678	-1.98858	0.133775	0.303982	0.00984142	-0.783861	0.316207	0.387341	0.762818	0.591959	0.498745	247678	Hydrogel	2.21273	0.000179627	2.21273	2.21273	2.21273
10265835	-1.98637	0.451009	0.381084	0.154675	0.375396	0.205433	0.645002	0.563219	0.839752	-0.0657508	10265835	Anti-EBV	1.03193	3.87428e-05	1.03193	1.03193	1.03193
11119839	-1.98601	0.323492	0.407488	0.13986	0.230082	0.234688	0.567685	0.945305	0.683913	0.269082	11119839	Hydrogel	0.73199	2.95602e-06	0.73199	0.73199	0.73199
87150598	-1.98387	0.294973	0.411911	0.170172	0.119886	0.0637961	0.426818	0.734325	0.665667	0.269082	87150598	Hydrogel	0.807396	1.19529e-05	0.807396	0.807396	0.807396
70610597	-1.98232	0.576467	0.357844	0.0804652	-0.0059221	0.00819984	0.0808944	0.0210122	0.411534	-1.22152	70610597	Anti-EBV	2.96666	0.00026958	2.96666	2.96666	2.96666
643968	-1.98232	0.576467	0.357844	0.0804652	-0.0059221	0.00819984	0.0808944	0.0210122	0.411534	-0.863908	643968	Anti-EBV	1.79199	0.000129428	1.79199	1.79199	1.79199
5702211	-1.98232	0.576467	0.357844		-0.0059221	0.00819984	0.0808944	0.0210122	0.411534	-1.51523	5702211	Anti-EBV	5.2767	0.000545198	5.2767	5.2767	5.2767
13071731	-1.98232	0.576467	0.357844	0.0804652	-0.0059221	0.00819984	0.0808944	0.0210122	0.411534	-0.487631	13071731	Anti-EBV	1.16287	5.43653e-05	1.16287	1.16287	1.16287
43834572	-1.98232	0.576467	0.357844	0.0804652	-0.0059221	0.00819984	0.0808944	0.0210122	0.411534	-0.191699	43834572	Anti-EBV	0.853825	1.74925e-05	0.853825	0.853825	0.853825
853012	-1.98232	0.576467	0.357844	0.0804652	-0.0059221	0.00819984	0.0808944	0.0210122	0.411534	-0.384347	853012	Anti-EBV	1.04201	3.99448e-05	1.04201	1.04201	1.04201
450214	-1.98232	0.576467	0.369355	0.0804652	0.0211875	0.00888994	0.0776542	0.0228917	0.411534	1.59208	450214	Hydrogel	1.81594	0.000132285	1.81594	1.81594	1.81594
9881867	-1.97998	0.237792	0.368611	0.0873036	0.0296772	0.185048	0.492325	0.576862	0.452527	1.59208	9881867	Hydrogel	1.80657	0.000131168	1.80657	1.80657	1.80657
10716626	-1.97611	0.849722	0.446708	0.435182	1.92165	0.121849	0.559879	0.817263	0.715714	1.59208	10716626	Anti-EBV	0.837723	1.55713e-05	0.837723	0.837723	0.837723
154701264	-1.97334	0.523022	0.400061	0.554375	-0.598252	0.17658	0.537973	0.872849	0.657933	1.59208	154701264	Hydrogel	2.95973	0.000268753	2.95973	2.95973	2.95973
14237950	-1.97214	0.628462	0.412483	0.146083	2.41833	0.526319	0.442158	0.518091	0.693546	1.59208	14237950	Anti-EBV	1.03494	3.91017e-05	1.03494	1.03494	1.03494
6426626	-1.97214	0.628462	0.412483	0.146083	2.41833	0.526319	0.442158	0.518091	0.693546	1.59208	6426626	Anti-EBV	1.03494	3.91017e-05	1.03494	1.03494	1.03494
23757287	-1.97165	0.479308	0.37157	0.0448165	-0.636494	0.0212478	0.252625	0.826591	0.531327	1.59208	23757287	Hydrogel	3.06761	0.000281625	3.06761	3.06761	3.06761
92262645	-1.97144	0.411644	0.439588	0.163072	1.56521	0.443022	0.719966	0.790781	0.923971	-0.447676	92262645	Anti-EBV	2.57525	0.000222881	2.57525	2.57525	2.57525
131858479	-1.97144	0.411644	0.439588	0.163072	1.56521	0.443022	0.719966	0.790781	0.923971	-0.314468	131858479	Anti-EBV	2.31138	0.000191397	2.31138	2.31138	2.31138
160418	-1.96962	0.879617	0.437854	0.184352	1.07783	0.109442	0.515127	0.478531	0.563975	-0.57756	160418	Anti-EBV	2.38882	0.000200637	2.38882	2.38882	2.38882
23518344	-1.96689	0.385381	0.436308	0.122577	1.12331	0.300019	0.630006	0.69172	0.80779	0.252286	23518344	Anti-EBV	1.26217	6.62138e-05	1.26217	1.26217	1.26217
118796809	-1.96392	0.811749	0.476905	0.17838	1.37557	0.91205	0.719328	0.951818	0.843937	0.252286	118796809	Anti-EBV	1.4239	8.55093e-05	1.4239	1.4239	1.4239
128557	-1.95944	0.270207	0.399861	0.30823	-0.705819	0.10023	0.562923	0.413834	0.65175	-1.46283	128557	Anti-EBV	2.86277	0.000257185	2.86277	2.86277	2.86277
88101259	-1.95602	0.772752	0.352192	0.0344867	2.42794	0.139543	0.213333	0.814424	0.659053	0.447895	88101259	Anti-EBV	1.87195	0.000138968	1.87195	1.87195	1.87195
452091	-1.95017	0.255563	0.350342	0.121026	-0.495308	0.179855	0.530948	0.427366	0.503545	0.447895	452091	Hydrogel	1.62394	0.000109377	1.62394	1.62394	1.62394
58478862	-1.95017	0.568636	0.362324	0.275373	0.153148	0.123628	0.365042	0.426813	0.583302	-1.05341	58478862	Anti-EBV	2.60984	0.000227007	2.60984	2.60984	2.60984
472655	-1.94692	0.483677	0.410994	0.0748022	-0.0523546	0.323349	0.516417	0.705409	0.836295	-2.41828	472655	Anti-EBV	6.39111	0.000678162	6.39111	6.39111	6.39111
49791785	-1.94692	0.483677	0.410994	0.0748022	-0.0523546	0.323349	0.516417	0.705409	0.836295	0.0167403	49791785	Hydrogel	0.758678	6.14018e-06	0.758678	0.758678	0.758678
472632	-1.94692	0.483677	0.410994	0.0748022	-0.0523546	0.323349	0.516417	0.705409	0.836295	-0.853717	472632	Anti-EBV	1.74376	0.000123674	1.74376	1.74376	1.74376
9994200	-1.94601	0.51464	0.361333	0.257578	0.129386	0.202069	0.483253	0.518689	0.573229	-0.194492	9994200	Anti-EBV	0.968604	3.11871e-05	0.968604	0.968604	0.968604
22316435	-1.94601	0.51464	0.361333	0.257578	0.129386	0.202069	0.483253	0.518689	0.573229	0.0183847	22316435	Anti-EBV	0.787013	9.52096e-06	0.787013	0.787013	0.787013
15677395	-1.94601	0.51464	0.361333	0.257578	0.129386	0.202069	0.483253	0.518689	0.573229	-0.135096	15677395	Anti-EBV	0.913644	2.46296e-05	0.913644	0.913644	0.913644
92228414	-1.93714	0.234561	0.386748	0.0813144	-0.0677213	0.0721855	0.604469	0.924962	0.821844	-2.21077	92228414	Anti-EBV	10.3685	0.00115271	10.3685	10.3685	10.3685
11824	-1.93714	0.234561	0.386748	0.0813144	-0.0677213	0.0721855	0.604469	0.924962	0.821844	-2.21077	11824	Anti-EBV	10.3685	0.00115271	10.3685	10.3685	10.3685
512290	-1.93714	0.234561	0.386748	0.0813144	-0.0677213	0.0721855	0.604469	0.924962	0.821844	-2.21077	512290	Anti-EBV	10.3685	0.00115271	10.3685	10.3685	10.3685
247955	-1.93714	0.234561		0.0813144	-0.0677213	0.0721855	0.604469	0.924962	0.821844	-0.365033	247955	Anti-EBV	0.974549	3.18964e-05	0.974549	0.974549	0.974549
70587122	-1.93042	0.364809	0.406379	0.120304	0.707997	0.215619	0.470705	0.648038	0.829121	-0.365033	70587122	Anti-EBV	1.67649	0.000115647	1.67649	1.67649	1.67649
54571321	-1.92888	0.114336	0.425817	0.079083	-1.51535	0.0203997	0.556301	0.0597392	0.44641	-0.365033	54571321	Hydrogel	4.64094	0.000469344	4.64094	4.64094	4.64094
129009617	-1.92293	0.476965	0.460972	0.109753	0.45277	0.0788314	0.0959785	0.036774	0.552883	0.210708	129009617	Anti-EBV	0.867544	1.91293e-05	0.867544	0.867544	0.867544
451908	-1.91643	0.412624	0.356477	0.0302656	-0.95334	0.366198	0.628943	0.62431	0.804801	-0.485634	451908	Hydrogel	1.39387	8.19269e-05	1.39387	1.39387	1.39387
76973399	-1.91081	0.482939	0.449523	0.109753	0.45277	0.07584	0.0948043	0.0378195	0.559336	-0.485634	76973399	Anti-EBV	1.63828	0.000111088	1.63828	1.63828	1.63828
11779021	-1.90699	0.674532	0.411437		0.690269	0.171505	0.449073	0.915714	0.850575	-0.485634	11779021	Anti-EBV	1.87708	0.00013958	1.87708	1.87708	1.87708
490621	-1.90383	0.303657	0.377047	0.303738	0.159485	0.167665	0.520584	0.737847	0.634495	-0.485634	490621	Anti-EBV	1.3504	7.67402e-05	1.3504	1.3504	1.3504
131881813	-1.90215	0.262156	0.439078	0.240699	2.82992	0.375662	0.718056	0.80626	0.835054	-0.336809	131881813	Anti-EBV	3.56808	0.000341338	3.56808	3.56808	3.56808
194101	-1.89471	0.305414	0.438153	0.117963	2.64153	0.266338	0.783297	0.786081	0.834515	-1.46622	194101	Anti-EBV	14.2642	0.00161752	14.2642	14.2642	14.2642
73442717	-1.89118	0.586402	0.418823	0.16196	1.11188	0.228374	0.546656	0.633553	0.657194	0.210708	73442717	Anti-EBV	1.31343	7.23292e-05	1.31343	1.31343	1.31343
92230799	-1.89118	0.586402	0.418823	0.16196	1.11188	0.228374	0.546656	0.633553	0.657194	-1.39678	92230799	Anti-EBV	7.88269	0.000856126	7.88269	7.88269	7.88269
494271	-1.88753	0.342811	0.404028	0.0505557	-0.457434	0.0433775	0.537762	0.398444	0.861359	0.210708	494271	Hydrogel	1.36781	7.88179e-05	1.36781	1.36781	1.36781
89858725	-1.88752	0.643154	0.443212	0.276317	2.25643	0.360598	0.387398	0.329827	0.732147	-0.736467	89858725	Anti-EBV	4.38422	0.000438714	4.38422	4.38422	4.38422
447864	-1.88502	0.477725	0.357451	0.296149	0.230704	0.123152	0.501266	0.632788	0.493582	-0.245559	447864	Anti-EBV	1.11793	4.9003e-05	1.11793	1.11793	1.11793
69626062	-1.88502	0.477725	0.357451	0.296149	0.230704	0.123152	0.501266	0.632788	0.493582	-0.245559	69626062	Anti-EBV	1.11793	4.9003e-05	1.11793	1.11793	1.11793
489877	-1.8825	0.394514	0.402183	0.223374	-0.0502914	0.0338266	0.694991	0.529647	0.852622	-0.138335	489877	Anti-EBV	0.778488	8.50383e-06	0.778488	0.778488	0.778488
1468	-1.88114	0.0938938	0.344955	0.207145	0.368931	0.286733	0.690509	0.413857	0.799548	-0.292593	1468	Anti-EBV	1.29602	7.0252e-05	1.29602	1.29602	1.29602
131708761	-1.87828	0.640236	0.465595	0.132352	0.572418	0.963554	0.702975	0.934541	0.768874	-0.393733	131708761	Anti-EBV	1.62747	0.000109798	1.62747	1.62747	1.62747
10446782	-1.8706	0.796802	0.391954	0.280088	-0.232735	0.250166	0.592625	0.708942	0.784106	-0.393733	10446782	Anti-EBV	0.861266	1.83803e-05	0.861266	0.861266	0.861266
310052	-1.87013	0.61481	0.450749	0.114587	-1.78504	0.430045	0.579492	0.364974	0.54158	-0.227246	310052	Hydrogel	26.5962	0.00308889	26.5962	26.5962	26.5962
15612856	-1.87013	0.61481	0.450749	0.114587	-1.78504	0.430045	0.579492	0.364974	0.54158	-0.152906	15612856	Hydrogel	27.8317	0.0032363	27.8317	27.8317	27.8317
5272657	-1.86998	0.812632	0.424869	0.152419	-0.96925	0.134449	0.5719	0.456338	0.68426	-0.277914	5272657	Hydrogel	1.79252	0.000129491	1.79252	1.79252	1.79252
9948218	-1.86819	0.140824	0.393711	0.209294	0.136036	0.0517074	0.458632	0.69387	0.613811	-0.277914	9948218	Anti-EBV	1.07522	4.39076e-05	1.07522	1.07522	1.07522
71832128	-1.86287	0.320836	0.373852	0.192523	2.28528	0.318884	0.387891	0.504918	0.586562	-2.27226	71832128	Anti-EBV	15.0362	0.00170963	15.0362	15.0362	15.0362
42553032	-1.86287	0.320836	0.373852	0.192523	2.28528	0.318884	0.387891	0.504918	0.586562	-1.6005	42553032	Anti-EBV	21.6505	0.00249881	21.6505	21.6505	21.6505
42553033	-1.86287	0.320836	0.373852	0.192523	2.28528	0.318884	0.387891	0.504918	0.586562	-0.446264	42553033	Anti-EBV	3.43399	0.00032534	3.43399	3.43399	3.43399
3011901	-1.86162	0.14811	0.397677	0.0863004	0.248716	0.14665	0.406381	0.93836	0.800624	-0.582837	3011901	Anti-EBV	1.62671	0.000109707	1.62671	1.62671	1.62671
6450904	-1.86146	0.424924	0.447952	0.472227	1.18694	0.271033	0.540241	0.913891	0.829998	-1.69679	6450904	Anti-EBV	25.4711	0.00295465	25.4711	25.4711	25.4711
50989698	-1.86146	0.424924	0.447952	0.472227	1.18694	0.271033	0.540241	0.913891	0.829998	-1.69679	50989698	Anti-EBV	25.4711	0.00295465	25.4711	25.4711	25.4711
360644	-1.85276	0.485822	0.407716	0.184112	0.426278	0.237253	0.484736	0.323659	0.842182	-0.471596	360644	Anti-EBV	1.62645	0.000109676	1.62645	1.62645	1.62645
21592214	-1.849	0.385	0.379122	0.213913	0.563584	0.0345805	0.274551	0.752275	0.579452	-1.89437	21592214	Anti-EBV	75.8844	0.0089696	75.8844	75.8844	75.8844
481083	-1.8485	0.469192	0.366496	0.299269	0.509506	0.209875	0.416778	0.568111	0.832679	-4.65085	481083	Anti-EBV	1.89707	0.000141965	1.89707	1.89707	1.89707
481081	-1.8485	0.469192	0.366496	0.299269	0.509506	0.209875	0.416778	0.568111	0.832679	-4.65085	481081	Anti-EBV	1.89707	0.000141965	1.89707	1.89707	1.89707
484808	-1.84523	0.697343	0.410412	0.238778	0.631028	0.232785	0.444969	0.921509	0.854192	-4.65085	484808	Anti-EBV	1.95529	0.000148912	1.95529	1.95529	1.95529
469861	-1.84449	0.675822	0.475285	0.147881	3.65312	0.783177	0.688035	0.34021	0.556538	-2.12319	469861	Anti-EBV	28.6024	0.00332825	28.6024	28.6024	28.6024
6479208	-1.84164	0.173874	0.400799	0.264932	1.69099	0.0862413	0.429658	0.182388	0.457121	-1.63084	6479208	Anti-EBV	22.9916	0.00265882	22.9916	22.9916	22.9916
101670692	-1.8413	0.725346	0.322775	0.158186	-0.701428	0.283807	0.149129	0.0442519	0.475695	-1.63084	101670692	Anti-EBV	6.95211	0.000745096	6.95211	6.95211	6.95211
131880742	-1.83711	0.608174	0.383956	0.159365	2.32213	0.257234	0.43406	0.582502	0.667762	-1.43821	131880742	Anti-EBV	14.0382	0.00159056	14.0382	14.0382	14.0382
15410716	-1.83666	0.329866	0.300153	0.0765179	-0.240701	0.225414	0.611018	0.829313	0.406523	-0.659726	15410716	Anti-EBV	1.2106	6.00601e-05	1.2106	1.2106	1.2106
512680	-1.83586	0.274495	0.409875	0.0863908	0.173097	0.323819	0.518636	0.778344	0.632422	-0.948528	512680	Anti-EBV	2.4947	0.000213269	2.4947	2.4947	2.4947
72501	-1.8308	0.195943	0.39021	0.113601	-0.607329	0.198362	0.6578	0.537128	0.67736	-0.948528	72501	Anti-EBV	1.254	6.52385e-05	1.254	1.254	1.254
121487433	-1.82872	0.543401	0.446194	0.0244082	0.604214	0.0412171	0.130356	0.0733958	0.298153	-0.669516	121487433	Anti-EBV	2.26101	0.000185387	2.26101	2.26101	2.26101
3011924	-1.81367	0.185828	0.377934	0.249061	1.05029	0.352477	0.380044	0.946043	0.79582	-1.29767	3011924	Anti-EBV	7.14204	0.000767757	7.14204	7.14204	7.14204
21829243	-1.81122	0.284212	0.374299	0.302335	0.82135	0.495984	0.658929	0.895825	0.855546	-1.61499	21829243	Anti-EBV	18.2642	0.00209477	18.2642	18.2642	18.2642
14410899	-1.81056	0.734106	0.408045	0.0964365	-1.73893	0.313381	0.60625	0.537972	0.535076	-0.338498	14410899	Hydrogel	28.35	0.00329814	28.35	28.35	28.35
512286	-1.81049	0.305398	0.393355	0.0877286	0.885818	0.597443	0.468463	0.647685	0.660067	-0.399741	512286	Anti-EBV	1.9958	0.000153745	1.9958	1.9958	1.9958
516040	-1.81002	0.267662	0.42354	0.0950589	-1.61157	0.228114	0.428633	0.644914	0.450297	-2.37941	516040	Anti-EBV	1.19998	5.87932e-05	1.19998	1.19998	1.19998
395997	-1.80162	0.130896	0.39251	0.0810924	0.715334	0.0746104	0.724253	0.317692	0.884511	-2.33249	395997	Anti-EBV	7.41202	0.000799969	7.41202	7.41202	7.41202
457015	-1.8001	0.0949021	0.331149	0.141902	0.283226	0.129992	0.482274	0.413545	0.579412	-1.47034	457015	Anti-EBV	8.22727	0.000897238	8.22727	8.22727	8.22727
10067373	-1.79385	0.888113	0.405868	0.344769	1.85951	0.271702	0.472621	0.662414	0.493347	-0.0501483	10067373	Anti-EBV	2.2559	0.000184778	2.2559	2.2559	2.2559
10469813	-1.79339	0.445816	0.434015	0.155682	-0.404779	0.136163	0.478253	0.536655	0.651889	-2.24159	10469813	Anti-EBV	5.08853	0.000522747	5.08853	5.08853	5.08853
11737492	-1.79098	0.575766	0.402001	0.0793071	-0.175552	0.179437	0.689918	0.658545	0.864517	-0.0548355	11737492	Hydrogel	0.81278	1.25953e-05	0.81278	0.81278	0.81278
161470	-1.79034	0.495296	0.3859	0.274969	0.0375317	0.0533683	0.688859	0.254893	0.818401	-0.886761	161470	Anti-EBV	2.1537	0.000172585	2.1537	2.1537	2.1537
455227	-1.78951	0.922772	0.352552	0.185803	1.08537	0.405606	0.1422	0.518263	0.37207	-1.08875	455227	Anti-EBV	5.0946	0.000523471	5.0946	5.0946	5.0946
92236337	-1.78406	0.338975	0.36117	0.25129	0.505194	0.289695	0.644194	0.914546	0.854792	-1.03488	92236337	Anti-EBV	3.61422	0.000346842	3.61422	3.61422	3.61422
3006170	-1.78406	0.338975	0.36117	0.25129	0.505194	0.289695	0.644194	0.914546	0.854792	-0.467809	3006170	Anti-EBV	1.75251	0.000124717	1.75251	1.75251	1.75251
92271256	-1.78216	0.265098	0.365654	0.120506	1.19348	0.170939	0.538672	0.920737	0.849028	-0.546015	92271256	Anti-EBV	2.69715	0.000237425	2.69715	2.69715	2.69715
10357410	-1.78194	0.738504	0.401009	0.404212	-0.0155409	0.208543	0.408766	0.530964	0.494566	-1.56295	10357410	Anti-EBV	10.6994	0.0011922	10.6994	10.6994	10.6994
10660621	-1.77867	0.491511	0.365745	0.180724	0.738211	0.324816	0.251559	0.234852	0.671831	0.333966	10660621	Anti-EBV	0.977705	3.22729e-05	0.977705	0.977705	0.977705
3011899	-1.77839	0.491948	0.398515	0.555677	1.20169	0.232272	0.589602	0.884198	0.812299	-0.698745	3011899	Anti-EBV	3.19641	0.000296993	3.19641	3.19641	3.19641
14630157	-1.77085	0.786205	0.385174	0.238707	-1.51904	0.145427	0.497285	0.512892	0.534253	-0.0960592	14630157	Hydrogel	8.69825	0.000953433	8.69825	8.69825	8.69825
131853716	-1.77069	0.452721	0.392419	0.114513	0.56493	0.0401386	0.318584	0.597487	0.825042	-0.607806	131853716	Anti-EBV	2.13328	0.000170148	2.13328	2.13328	2.13328
6475236	-1.76381	0.453268	0.416684	0.198779	1.24666	0.360623	0.649845	0.830827	0.797182	-0.390592	6475236	Anti-EBV	2.3932	0.00020116	2.3932	2.3932	2.3932
472814	-1.76381	0.453268	0.416684	0.198779	1.24666	0.360623	0.649845	0.830827	0.797182	-0.390592	472814	Anti-EBV	2.3932	0.00020116	2.3932	2.3932	2.3932
490625	-1.76376	0.658162	0.375615	0.137336	0.522926	0.165794	0.63837	0.443594	0.678679	-0.462463	490625	Anti-EBV	1.77798	0.000127756	1.77798	1.77798	1.77798
504747	-1.7608	0.652778	0.454101	0.36923	1.74426	0.128849	0.574616	0.849206	0.746221	-0.979187	504747	Anti-EBV	5.63468	0.00058791	5.63468	5.63468	5.63468
23545530	-1.75909	0.88636	0.391164	0.104008	0.369487	0.105553	0.244837	0.498834	0.429647	-0.41983	23545530	Anti-EBV	1.54058	9.94317e-05	1.54058	1.54058	1.54058
44400589	-1.75804	0.634062	0.456581	0.132352	0.558443	0.968662	0.704416	0.935319	0.762964	-2.40572	44400589	Anti-EBV	5.76509	0.00060347	5.76509	5.76509	5.76509
71262374	-1.75804	0.634062	0.456581	0.132352	0.558443	0.968662	0.704416	0.935319	0.762964	-0.458156	71262374	Anti-EBV	1.8131	0.000131946	1.8131	1.8131	1.8131
5273019	-1.75542	0.148849	0.355272	0.0523333	-0.966903	0.00628394	0.0963238	0.0363818	0.436368	-0.337431	5273019	Hydrogel	1.83603	0.000134683	1.83603	1.83603	1.83603
72212335	-1.75385	0.770165	0.38804	0.253499	-1.04232	0.165768	0.511726	0.741532	0.713351	-1.54419	72212335	Anti-EBV	4.09212	0.000403862	4.09212	4.09212	4.09212
14159235	-1.75385	0.770165	0.38804	0.253499	-1.04232	0.165768	0.511726	0.741532	0.713351	-1.54419	14159235	Anti-EBV	4.09212	0.000403862	4.09212	4.09212	4.09212
121486876	-1.7426	0.22189	0.396979	0.288249	2.22611	0.689323	0.545931	0.86137	0.677013	-0.382709	121486876	Anti-EBV	3.42011	0.000323683	3.42011	3.42011	3.42011
387981	-1.74062	0.234933	0.359331	0.523302	-0.584264	0.0522072	0.433586	0.627518	0.555543	0.171018	387981	Hydrogel	1.63079	0.000110195	1.63079	1.63079	1.63079
10266777	-1.74062	0.234933	0.359331	0.523302	-0.584264	0.0522072	0.433586	0.627518	0.555543	-0.892681	10266777	Anti-EBV	1.22147	6.13574e-05	1.22147	1.22147	1.22147
21157833	-1.739	0.468196	0.363883	0.226006	0.20713	0.110052	0.615724	0.885221	0.847526	-0.446264	21157833	Anti-EBV	1.42188	8.52689e-05	1.42188	1.42188	1.42188
454925	-1.73797	0.776288	0.388652	0.0384547	1.89279	0.713017	0.311046	0.540359	0.439276	-0.446264	454925	Anti-EBV	3.26797	0.000305531	3.26797	3.26797	3.26797
93476651	-1.73176	0.461204	0.430675	0.18412	0.504809	0.236751	0.48328	0.866149	0.877268	1.11877	93476651	Hydrogel	1.09532	4.63054e-05	1.09532	1.09532	1.09532
10019125	-1.73176	0.461204	0.430675	0.18412	0.504809	0.236751	0.48328	0.866149	0.877268	-0.51829	10019125	Anti-EBV	1.89943	0.000142247	1.89943	1.89943	1.89943
3011897	-1.73083	0.25934	0.391964	0.42191	-0.00132219	0.162906	0.531385	0.783821	0.804852	-0.51829	3011897	Anti-EBV	1.31004	7.19251e-05	1.31004	1.31004	1.31004
513632	-1.729	0.622563	0.464236	0.173003	3.42797	0.82578	0.616737	0.58324	0.658347	-0.494874	513632	Anti-EBV	5.20234	0.000536326	5.20234	5.20234	5.20234
23616027	-1.72852	0.315684	0.397562	0.288298	-0.11729	0.120299	0.720803	0.530736	0.818973	-3.47784	23616027	Anti-EBV	2.00966	0.000155398	2.00966	2.00966	2.00966
44330586	-1.72852	0.315684	0.397562	0.288298	-0.11729	0.120299	0.720803	0.530736	0.818973	-3.47784	44330586	Anti-EBV	2.00966	0.000155398	2.00966	2.00966	2.00966
92209904	-1.72852	0.315684	0.397562	0.288298	-0.11729	0.120299	0.720803	0.530736	0.818973	-0.583246	92209904	Anti-EBV	1.28247	6.86348e-05	1.28247	1.28247	1.28247
21776949	-1.72852	0.315684	0.397562	0.288298	-0.11729	0.120299	0.720803	0.530736	0.818973	-1.66447	21776949	Anti-EBV	34.8632	0.00407525	34.8632	34.8632	34.8632
3007918	-1.72852	0.315684	0.397562	0.288298	-0.11729	0.120299	0.720803	0.530736	0.818973	0.587642	3007918	Hydrogel	1.32583	7.38089e-05	1.32583	1.32583	1.32583
92209902	-1.72852	0.315684	0.397562	0.288298	-0.11729	0.120299	0.720803	0.530736	0.818973	-1.41027	92209902	Anti-EBV	6.45254	0.000685491	6.45254	6.45254	6.45254
92846012	-1.72852	0.315684	0.397562	0.288298	-0.11729	0.120299	0.720803	0.530736	0.818973	-0.978883	92846012	Anti-EBV	2.33249	0.000193916	2.33249	2.33249	2.33249
9862222	-1.72816	0.0996463	0.349314	0.146126	1.3799	0.221903	0.743997	0.957066	0.789999	-0.609218	9862222	Anti-EBV	3.22108	0.000299936	3.22108	3.22108	3.22108
121578	-1.72669	0.39798	0.378418	0.108249	0.145278	0.257194	0.374499	0.506384	0.815903	-0.609218	121578	Anti-EBV	1.66193	0.00011391	1.66193	1.66193	1.66193
131855105	-1.72483	0.542917	0.446501	0.175888	0.128561	0.270677	0.575536	0.584166	0.729294	-0.609218	131855105	Anti-EBV	1.64234	0.000111572	1.64234	1.64234	1.64234
131881061	-1.72467	0.337889	0.421554	0.211867	2.0617	0.183788	0.666703	0.913752	0.92923	-0.609218	131881061	Anti-EBV	4.09334	0.000404008	4.09334	4.09334	4.09334
3067878	-1.72447	0.902597	0.419455	0.143947	-1.05642	0.251432	0.513984	0.397835	0.487728	-0.609218	3067878	Hydrogel	1.65377	0.000112936	1.65377	1.65377	1.65377
513636	-1.72406	0.676547	0.473323	0.283739	3.49539	0.676524	0.651841	0.573452	0.574411	-0.609218	513636	Anti-EBV	5.91385	0.000621219	5.91385	5.91385	5.91385
9796412	-1.72395	0.631739	0.389902	0.164455	0.239024	0.0780928	0.31342	0.460901	0.585709	-0.609218	9796412	Anti-EBV	1.78321	0.00012838	1.78321	1.78321	1.78321
13566110	-1.72037	0.7634	0.460187	0.24009	0.427005	0.0250808	0.203457	0.0955699	0.404078	-0.609218	13566110	Anti-EBV	2.02593	0.00015734	2.02593	2.02593	2.02593
42552658	-1.71954	0.366193	0.387593	0.320724	3.02036	0.186516	0.399213	0.57285	0.578712	-1.24847	42552658	Anti-EBV	13.5221	0.00152898	13.5221	13.5221	13.5221
42552656	-1.71954	0.366193	0.387593	0.320724	3.02036	0.186516	0.399213	0.57285	0.578712	-0.611896	42552656	Anti-EBV	5.34461	0.0005533	5.34461	5.34461	5.34461
11277569	-1.71855	0.347392	0.382616	0.38108	-0.0630344	0.183198	0.702943	0.755267	0.818948	-0.372779	11277569	Anti-EBV	1.03259	3.88218e-05	1.03259	1.03259	1.03259
13922191	-1.71431	0.808216	0.395473	0.167898	0.225259	0.0247345	0.134206	0.0421366	0.411868	0.271863	13922191	Hydrogel	0.741082	4.04074e-06	0.741082	0.741082	0.741082
29978508	-1.71431	0.808216	0.395473	0.167898	0.225259	0.0247345	0.134206	0.0421366	0.411868	-1.29631	29978508	Anti-EBV	5.85489	0.000614183	5.85489	5.85489	5.85489
117810735	-1.71431	0.808216	0.395473	0.167898	0.225259	0.0247345	0.134206	0.0421366	0.411868	-0.766223	117810735	Anti-EBV	2.18602	0.000176441	2.18602	2.18602	2.18602
92977577	-1.71431	0.808216	0.395473	0.167898	0.225259	0.0247345	0.134206	0.0421366	0.411868	-0.855954	92977577	Anti-EBV	2.48846	0.000212525	2.48846	2.48846	2.48846
13922189	-1.71431	0.808216	0.395473	0.167898	0.225259	0.0247345	0.134206	0.0421366	0.411868	-0.692557	13922189	Anti-EBV	1.97744	0.000151554	1.97744	1.97744	1.97744
9871558	-1.71431	0.808216	0.395473	0.167898	0.225259	0.0247345	0.134206	0.0421366	0.411868	-4.4538	9871558	Anti-EBV	1.70836	0.00011945	1.70836	1.70836	1.70836
10859911	-1.71204	0.6082	0.41542	0.0333449	0.956596	0.0891871	0.49774	0.453364	0.682426	-4.4538	10859911	Anti-EBV	2.08359	0.00016422	2.08359	2.08359	2.08359
97186	-1.70879	0.644176	0.402157	0.538947	1.49867	0.515149	0.682714	0.894587	0.827361	0.0875779	97186	Anti-EBV	1.818	0.000132531	1.818	1.818	1.818
46875292	-1.70879	0.644176	0.402157	0.538947	1.49867	0.515149	0.682714	0.894587	0.827361	0.0292764	46875292	Anti-EBV	1.9027	0.000142637	1.9027	1.9027	1.9027
9881866	-1.70627	0.145376	0.317876	0.312039	-0.096361	0.0888363	0.481901	0.511889	0.530417	0.0292764	9881866	Hydrogel	0.817465	1.31542e-05	0.817465	0.817465	0.817465
280444	-1.70627	0.145376	0.317876	0.312039	-0.096361	0.0888363	0.481901	0.511889	0.530417	0.0292764	280444	Hydrogel	0.817465	1.31542e-05	0.817465	0.817465	0.817465
189898	-1.70596	0.274448	0.415865	0.098867	0.47326	0.466738	0.696451	0.714898	0.809844	0.0292764	189898	Anti-EBV	1.06894	4.3159e-05	1.06894	1.06894	1.06894
167821	-1.70451	0.407927	0.424697	0.025723	1.62888	0.0743182	0.576002	0.79599	0.84166	0.0292764	167821	Anti-EBV	2.01185	0.00015566	2.01185	2.01185	2.01185
44629858	-1.7044	0.290355	0.309541	0.0778894	0.949239	0.0444432	0.161072	0.0187414	0.42895	0.0292764	44629858	Anti-EBV	1.45754	8.95229e-05	1.45754	1.45754	1.45754
7048664	-1.7044	0.290355	0.309541	0.0778894	0.949239	0.0444432	0.161072	0.0187414	0.42895	0.575745	7048664	Anti-EBV	0.938753	2.76254e-05	0.938753	0.938753	0.938753
124507746	-1.7044	0.290355	0.309541	0.0778894	0.949239	0.0444432	0.161072	0.0187414	0.42895	-0.780509	124507746	Anti-EBV	3.3548	0.000315891	3.3548	3.3548	3.3548
133688189	-1.7044	0.290355	0.309541	0.0778894	0.949239	0.0444432	0.161072	0.0187414	0.42895	-0.780509	133688189	Anti-EBV	3.3548	0.000315891	3.3548	3.3548	3.3548
688477	-1.7044	0.290355	0.309541	0.0778894	0.949239	0.0444432	0.161072	0.0187414	0.42895	-1.55596	688477	Anti-EBV	24.572	0.00284737	24.572	24.572	24.572
17571993	-1.7044	0.290355	0.309541	0.0778894	0.949239	0.0444432	0.161072	0.0187414	0.42895	-1.55596	17571993	Anti-EBV	24.572	0.00284737	24.572	24.572	24.572
136260503	-1.70369	0.78152	0.436664	0.334576	1.94296	0.144189	0.389007	0.945142	0.814437	-0.997904	136260503	Anti-EBV	6.59968	0.000703047	6.59968	6.59968	6.59968
11758878	-1.69947	0.755193	0.384206	0.337501	-0.196734	0.144926	0.411564	0.513309	0.571204	-0.46041	11758878	Anti-EBV	1.00804	3.58928e-05	1.00804	1.00804	1.00804
6482630	-1.69872	0.396765	0.397476	0.0348296	0.2031	0.0896409	0.570459	0.604862	0.831631	-0.515999	6482630	Anti-EBV	1.56693	0.000102576	1.56693	1.56693	1.56693
193188	-1.69747	0.423405	0.380136	0.209747	0.319587	0.153971	0.659606	0.482353	0.623678	-0.515999	193188	Anti-EBV	1.70728	0.00011932	1.70728	1.70728	1.70728
490353	-1.6967	0.335987	0.386722	0.197223	0.289696	0.00926295	0.491048	0.333838	0.809456	-0.515999	490353	Anti-EBV	1.67213	0.000115127	1.67213	1.67213	1.67213
491674	-1.69293	0.740775	0.364205	0.253068	-0.704797	0.47138	0.318289	0.716023	0.372782	-0.515999	491674	Hydrogel	0.977299	3.22245e-05	0.977299	0.977299	0.977299
72194	-1.69293	0.740775	0.364205	0.253068	-0.704797	0.47138	0.318289	0.716023	0.372782	-0.515999	72194	Hydrogel	0.977299	3.22245e-05	0.977299	0.977299	0.977299
359064	-1.69293	0.740775	0.364205	0.253068	-0.704797	0.47138		0.716023	0.372782	-0.515999	359064	Hydrogel	0.977299	3.22245e-05	0.977299	0.977299	0.977299
92151285	-1.69293	0.740775	0.364205	0.253068	-0.704797	0.47138	0.318289	0.716023	0.372782	0.748161	92151285	Hydrogel	2.78654	0.00024809	2.78654	2.78654	2.78654
511670	-1.68955	0.299123	0.351434	0.0745435	0.502567	0.00553809	0.128236	0.0583036	0.288849	0.00936256	511670	Anti-EBV	1.11765	4.89703e-05	1.11765	1.11765	1.11765
121487512	-1.68955	0.299123	0.351434		0.502567	0.00553809	0.128236	0.0583036	0.288849	0.0988658	121487512	Anti-EBV	1.02633	3.80745e-05	1.02633	1.02633	1.02633
86751195	-1.68937	0.641704	0.3614	0.288009	-0.210028	0.349147	0.335926	0.565727	0.367046	-0.202432	86751195	Hydrogel	0.714361	8.52648e-07	0.714361	0.714361	0.714361
131708567	-1.68849	0.301292	0.308566	0.0766416	0.955012	0.0397795	0.153766	0.0186261	0.430053	-1.06383	131708567	Anti-EBV	5.27756	0.0005453	5.27756	5.27756	5.27756
131885779	-1.68849	0.297947	0.309037	0.0778894	0.910743	0.0397795	0.155551	0.0186261	0.429673	-1.6959	131885779	Anti-EBV	495.478	0.0590325	495.478	495.478	495.478
90472229	-1.68724	0.597608	0.367792		-0.190841	0.00978739	0.0770352	0.0162948	0.403281	-1.6959	90472229	Anti-EBV	244.495	0.029087	244.495	244.495	244.495
451602	-1.68577	0.0995013	0.352954	0.0810017	-0.360178	0.0266585	0.0676963	0.019353	0.388106	-1.6959	451602	Anti-EBV	185.455	0.0220428	185.455	185.455	185.455
134693115	-1.68577	0.0995013	0.352954	0.0810017	-0.360178	0.0266585	0.0676963	0.019353	0.388106	-1.6959	134693115	Anti-EBV	185.455	0.0220428	185.455	185.455	185.455
14312484	-1.68577	0.0995013	0.352954	0.0810017	-0.360178	0.0266585	0.0676963	0.019353	0.388106	0.812938	14312484	Hydrogel	1.95863	0.00014931	1.95863	1.95863	1.95863
5278282	-1.68267	0.689084	0.384085	0.155156	0.377552	0.0516326	0.47625	0.595288	0.714811	0.812938	5278282	Hydrogel	1.00596	3.56447e-05	1.00596	1.00596	1.00596
473280	-1.67931	0.931865	0.380393	0.0350821	-0.18133	0.0162891	0.168551	0.0444463	0.45324	-1.14523	473280	Anti-EBV	3.25935	0.000304502	3.25935	3.25935	3.25935
16760387	-1.67828	0.354968	0.379894	0.170536	-0.397872	0.0597792	0.083711	0.0222943	0.542832	-0.515999	16760387	Anti-EBV	0.850829	1.7135e-05	0.850829	0.850829	0.850829
16212026	-1.67828	0.361128	0.379705	0.183941	-0.37206	0.0597792	0.0968045	0.0269848	0.543794	-0.515999	16212026	Anti-EBV	0.882236	2.08822e-05	0.882236	0.882236	0.882236
102602088	-1.67828	0.361128	0.379705	0.183941	-0.37206	0.0597792	0.0968045	0.0269848	0.543794	0.948945	102602088	Hydrogel	2.13731	0.000170628	2.13731	2.13731	2.13731
121486971	-1.67828	0.356518	0.380306	0.165921	-0.455179	0.068047	0.0918483	0.0250678	0.543323	0.910693	121486971	Hydrogel	2.28638	0.000188414	2.28638	2.28638	2.28638
6603781	-1.67828	0.354968	0.379894	0.170536	-0.397872	0.0597792	0.083711	0.0222943	0.542832	0.910693	6603781	Hydrogel	2.1524	0.000172429	2.1524	2.1524	2.1524
121487027	-1.67828	0.359483	0.379704	0.178719	-0.351846	0.0608058	0.0838875	0.0269188	0.543828	0.910693	121487027	Hydrogel	2.05318	0.000160591	2.05318	2.05318	2.05318
121487034	-1.67828	0.356995	0.37986	0.170536	-0.410827	0.0597792	0.0843219	0.0252241	0.543323	0.154442	121487034	Hydrogel	1.33782	7.52389e-05	1.33782	1.33782	1.33782
160696	-1.67828	0.354968	0.379894	0.170536	-0.397872	0.0597792	0.083711	0.0222943	0.542832	0.28562	160696	Hydrogel	1.46201	9.00569e-05	1.46201	1.46201	1.46201
12358851	-1.67828	0.354968	0.379894	0.170536	-0.397872	0.0597792	0.083711	0.0222943	0.542832	-0.718173	12358851	Anti-EBV	1.17889	5.62765e-05	1.17889	1.17889	1.17889
131701110	-1.67828	0.361355	0.379816	0.170536	-0.45087	0.0597792	0.0863178	0.0273679	0.543828	-0.718173	131701110	Anti-EBV	1.10082	4.69625e-05	1.10082	1.10082	1.10082
24729357	-1.67828	0.354968	0.379894	0.170536	-0.397872	0.0597792	0.083711	0.0222943	0.542832	-0.718173	24729357	Anti-EBV	1.17889	5.62765e-05	1.17889	1.17889	1.17889
5702244	-1.67828	0.354968	0.379894	0.170536	-0.397872	0.0597792	0.083711	0.0222943	0.542832	-0.718173	5702244	Anti-EBV	1.17889	5.62765e-05	1.17889	1.17889	1.17889
91142034	-1.67828	0.361355	0.379816	0.170536	-0.45087	0.0597792	0.0863178	0.0273679	0.543828	-0.718173	91142034	Anti-EBV	1.10082	4.69625e-05	1.10082	1.10082	1.10082
596	-1.67828	0.354968		0.170536	-0.397872	0.0597792	0.083711	0.0222943	0.542832	-0.718173	596	Anti-EBV	1.17889	5.62765e-05	1.17889	1.17889	1.17889
102601364	-1.67828	0.358955	0.37983	0.170536	-0.410827	0.0597792	0.0843219	0.0269951	0.543828	-0.718173	102601364	Anti-EBV	1.1598	5.39997e-05	1.1598	1.1598	1.1598
67709179	-1.67766	0.510224	0.398547	0.102831	0.487567	0.0597102	0.081411	0.0408247	0.451536	-0.718173	67709179	Anti-EBV	2.48425	0.000212023	2.48425	2.48425	2.48425
150851	-1.67756	0.590909	0.368052	0.0856416	-0.157127	0.00978739	0.0769019	0.0149111	0.402566	-0.718173	150851	Anti-EBV	1.53411	9.86589e-05	1.53411	1.53411	1.53411
21122961	-1.67756	0.590909	0.368052	0.0856416	-0.157127	0.00978739	0.0769019	0.0149111	0.402566	-0.718173	21122961	Anti-EBV	1.53411	9.86589e-05	1.53411	1.53411	1.53411
29933626	-1.67756	0.590909	0.368052	0.0856416	-0.157127	0.00978739	0.0769019	0.0149111	0.402566	-0.718173	29933626	Anti-EBV	1.53411	9.86589e-05	1.53411	1.53411	1.53411
40544496	-1.67756	0.590909	0.368052	0.0856416	-0.157127	0.00978739	0.0769019	0.0149111	0.402566	-0.718173	40544496	Anti-EBV	1.53411	9.86589e-05	1.53411	1.53411	1.53411
44629873	-1.67756	0.590909	0.368052	0.0856416	-0.157127	0.00978739	0.0769019	0.0149111	0.402566	-0.718173	44629873	Anti-EBV	1.53411	9.86589e-05	1.53411	1.53411	1.53411
92268334	-1.67756	0.590909	0.368052	0.0856416	-0.157127	0.00978739	0.0769019	0.0149111	0.402566	-0.718173	92268334	Anti-EBV	1.53411	9.86589e-05	1.53411	1.53411	1.53411
3007908	-1.67756	0.590909	0.368052	0.0856416	-0.157127	0.00978739	0.0769019	0.0149111	0.402566	-0.718173	3007908	Anti-EBV	1.53411	9.86589e-05	1.53411	1.53411	1.53411
45358309	-1.67756	0.590909	0.368052	0.0856416	-0.157127	0.00978739	0.0769019	0.0149111	0.402566	-0.718173	45358309	Anti-EBV	1.53411	9.86589e-05	1.53411	1.53411	1.53411
3080719	-1.67383	0.263846	0.399768	0.06176	-0.655995	0.0619751	0.527967	0.219653	0.672534	0.719229	3080719	Hydrogel	2.61786	0.000227964	2.61786	2.61786	2.61786
5273524	-1.67383	0.263846	0.399768	0.06176	-0.655995	0.0619751	0.527967	0.219653	0.672534	0.948945	5273524	Hydrogel	2.93703	0.000266045	2.93703	2.93703	2.93703
175228	-1.67334	0.408077	0.421824	0.0938804	0.0671191	0.13225	0.472241	0.539292	0.798517	0.948945	175228	Hydrogel	1.42362	8.54768e-05	1.42362	1.42362	1.42362
21721736	-1.66459	0.433101	0.365964	0.0398807	-0.680475	0.217459	0.56157	0.760298	0.72005	0.948945	21721736	Hydrogel	3.04861	0.000279358	3.04861	3.04861	3.04861
3083166	-1.65916	0.792943	0.361596	0.214423	0.235961	0.0420912	0.313155	0.505263	0.819874	0.948945	3083166	Hydrogel	1.23915	6.34672e-05	1.23915	1.23915	1.23915
6451079	-1.65079	0.327789	0.450767	0.189921	1.18806	0.109769	0.481709	0.951581	0.824023	0.948945	6451079	Anti-EBV	0.837179	1.55064e-05	0.837179	0.837179	0.837179
472637	-1.65058	0.562395	0.379247	0.130472	-0.0910601	0.0403022	0.737192	0.567306	0.694486	0.948945	472637	Hydrogel	1.65019	0.00011251	1.65019	1.65019	1.65019
6480471	-1.6497	0.070746	0.32274	0.1066	0.238387	0.132179	0.489082	0.331093	0.753331	0.948945	6480471	Hydrogel	1.23932	6.34869e-05	1.23932	1.23932	1.23932
76974604	-1.6478	0.303361	0.308863	0.0774362	0.931929	0.0444432	0.156406	0.0187126	0.430446	0.948945	76974604	Hydrogel	0.716431	1.09956e-06	0.716431	0.716431	0.716431
44396095	-1.64609	0.567057	0.367207	0.196485	0.411317	0.17032	0.274611	0.626791	0.822824	-0.777749	44396095	Anti-EBV	2.64363	0.000231039	2.64363	2.64363	2.64363
21140838	-1.64518	0.795523	0.443778	0.149186	1.71155	0.230192	0.331456	0.91452	0.827892	-0.777749	21140838	Anti-EBV	4.76545	0.0004842	4.76545	4.76545	4.76545
14806063	-1.64431	0.635299	0.420386	0.230025	1.35645	0.515358	0.56227	0.725905	0.574895	-0.531452	14806063	Anti-EBV	3.1062	0.000286229	3.1062	3.1062	3.1062
196710	-1.64431	0.635299	0.420386	0.230025	1.35645	0.515358	0.56227	0.725905	0.574895	-0.316618	196710	Anti-EBV	2.48917	0.00021261	2.48917	2.48917	2.48917
6454537	-1.64183	0.950082	0.335681	0.0197802	-0.390598	0.199043	0.197543	0.74259	0.545383	-0.0461447	6454537	Hydrogel	1.09641	4.64365e-05	1.09641	1.09641	1.09641
54192124	-1.64183	0.950082	0.335681	0.0197802	-0.390598	0.199043	0.197543	0.74259	0.545383	-2.27753	54192124	Anti-EBV	3.49058	0.000332092	3.49058	3.49058	3.49058
121012732	-1.64064	0.28165	0.352757	0.0480973	0.494134	0.0522482	0.2324	0.695411	0.59482	0.109467	121012732	Anti-EBV	1.01794	3.70731e-05	1.01794	1.01794	1.01794
124528040	-1.64062	0.58923	0.445061	0.132409	-0.792063	0.274948	0.680088	0.38763	0.68219	-0.724703	124528040	Hydrogel	0.819356	1.33799e-05	0.819356	0.819356	0.819356
21852781	-1.6355	0.660543	0.415435	0.178638	0.17534	0.0708053	0.151083	0.667504	0.609114	-0.515999	21852781	Anti-EBV	1.58042	0.000104185	1.58042	1.58042	1.58042
512658	-1.63467	0.713966	0.384076	0.176953	0.553857	0.158483	0.706879	0.596293	0.82002	-0.207689	512658	Anti-EBV	1.46183	9.00347e-05	1.46183	1.46183	1.46183
506143	-1.63438	0.51045	0.402949	0.0699373	0.0993217	0.171608	0.507217	0.395691	0.859301	1.52971	506143	Hydrogel	1.87388	0.000139198	1.87388	1.87388	1.87388
72968	-1.63438	0.51045	0.402949	0.0699373	0.0993217	0.171608	0.507217	0.395691	0.859301	-0.336557	72968	Anti-EBV	1.18206	5.66553e-05	1.18206	1.18206	1.18206
54069128	-1.63417	0.467801	0.391506	0.135296	0.967805	0.305598	0.674327	0.492215	0.724856	-0.336557	54069128	Anti-EBV	2.12865	0.000169596	2.12865	2.12865	2.12865
91884695	-1.63124	0.452572	0.372608	0.124318	0.0274673	0.0379963	0.0732413	0.0325258	0.405042	-0.438436	91884695	Anti-EBV	1.25948	6.58919e-05	1.25948	1.25948	1.25948
92043448	-1.63124	0.452572	0.372608	0.124318	0.0274673	0.0379963	0.0732413	0.0325258	0.405042	-0.438436	92043448	Anti-EBV	1.25948	6.58919e-05	1.25948	1.25948	1.25948
65031	-1.63124	0.452572	0.372608	0.124318	0.0274673	0.0379963	0.0732413	0.0325258	0.405042	-1.70374	65031	Anti-EBV	33.0583	0.0038599	33.0583	33.0583	33.0583
76973301	-1.6298	0.818163	0.461132	0.170202	0.411018	0.0287146	0.134591	0.0495136	0.421512	-0.831928	76973301	Anti-EBV	2.91017	0.000262841	2.91017	2.91017	2.91017
333691	-1.62962	0.399907	0.395304	0.141543	0.192327	0.141017	0.425011	0.399514	0.622072	0.800774	333691	Hydrogel	1.17938	5.63354e-05	1.17938	1.17938	1.17938
54041813	-1.62962	0.399907	0.395304	0.141543	0.192327	0.141017	0.425011	0.399514	0.622072	-1.98399	54041813	Anti-EBV	7.97791	0.000867487	7.97791	7.97791	7.97791
21141083	-1.62689	0.634359	0.412733	0.162137	0.444129	0.0378377	0.11737	0.0373802	0.467143	-0.847094	21141083	Anti-EBV	3.04877	0.000279377	3.04877	3.04877	3.04877
21732848	-1.62443	0.417269	0.385048	0.0730253	0.98212	0.0404055	0.402798	0.548868	0.7793	-0.847094	21732848	Anti-EBV	4.03492	0.000397038	4.03492	4.03492	4.03492
22867782	-1.62342	0.510639	0.470605	0.168046	2.56484	0.273147	0.388033	0.359497	0.87331	-0.811972	22867782	Anti-EBV	6.59221	0.000702155	6.59221	6.59221	6.59221
473083	-1.61982	0.904859	0.414009	0.174849	-0.568116	0.230763	0.34571	0.350102	0.444577	0.0118978	473083	Hydrogel	1.48702	9.30412e-05	1.48702	1.48702	1.48702
71539312	-1.61942	0.378596	0.390397	0.104235	0.691535	0.0311443	0.134588	0.049826	0.464457	0.0118978	71539312	Anti-EBV	1.29628	7.02836e-05	1.29628	1.29628	1.29628
6483432	-1.6188	0.492366	0.378384	0.308617	1.01447	0.0473091	0.450605	0.702255	0.492526	0.0118978	6483432	Anti-EBV	1.57657	0.000103725	1.57657	1.57657	1.57657
15612862	-1.61792	0.572789	0.410317	0.0542199	-1.62405	0.364088	0.562299	0.533245	0.508922	0.0292764	15612862	Hydrogel	379.975	0.0452515	379.975	379.975	379.975
391266	-1.6136	0.881821	0.37602	0.162623	-0.10706	0.129009	0.492248	0.655577	0.768101	-0.0538053	391266	Hydrogel	0.757091	5.95089e-06	0.757091	0.757091	0.757091
496474	-1.6136	0.881821	0.37602	0.162623	-0.10706	0.129009	0.492248	0.655577	0.768101	-0.0538053	496474	Hydrogel	0.757091	5.95089e-06	0.757091	0.757091	0.757091
121427567	-1.61157	0.785453	0.388919	0.546257	-0.115226	0.0861596	0.114349	0.0644311	0.526977	0.285823	121427567	Hydrogel	1.08613	4.52097e-05	1.08613	1.08613	1.08613
11054511	-1.61157	0.785453	0.388919	0.546257	-0.115226	0.0861596	0.114349	0.0644311	0.526977	-0.35148	11054511	Anti-EBV	0.972247	3.16218e-05	0.972247	0.972247	0.972247
46705350	-1.61157	0.785453	0.388919	0.546257	-0.115226	0.0861596	0.114349	0.0644311	0.526977	-0.0644832	46705350	Hydrogel	0.755057	5.70817e-06	0.755057	0.755057	0.755057
13922196	-1.61157	0.785453	0.388919	0.546257	-0.115226	0.0861596	0.114349	0.0644311	0.526977	0.189032	13922196	Hydrogel	0.994655	3.42952e-05	0.994655	0.994655	0.994655
3461	-1.61157	0.785453	0.388919	0.546257	-0.115226	0.0861596	0.114349	0.0644311	0.526977	-0.889153	3461	Anti-EBV	2.22211	0.000180747	2.22211	2.22211	2.22211
6093357	-1.61157	0.785453	0.388919	0.546257	-0.115226	0.0861596	0.114349	0.0644311	0.526977	-0.136929	6093357	Anti-EBV	0.727914	2.46967e-06	0.727914	0.727914	0.727914
45357852	-1.61045	0.460277	0.341491	0.246157	-0.576513	0.103877	0.514798	0.60421	0.774796	-0.489389	45357852	Hydrogel	0.826264	1.42041e-05	0.826264	0.826264	0.826264
29924995	-1.61045	0.460277	0.341491	0.246157	-0.576513	0.103877	0.514798	0.60421	0.774796	-1.38043	29924995	Anti-EBV	5.64949	0.000589677	5.64949	5.64949	5.64949
490511	-1.60982	0.668968	0.339883	0.0642423	-0.25928	0.00857173	0.0973658	0.037374	0.679967	-1.17117	490511	Anti-EBV	3.64694	0.000350747	3.64694	3.64694	3.64694
6452137	-1.60777	0.361211	0.383447	0.0378148	0.100665	0.0177399	0.206416	0.0448498	0.555645	-1.17117	6452137	Anti-EBV	4.8267	0.000491508	4.8267	4.8267	4.8267
54260440	-1.60444	0.326516	0.38055	0.103019	0.885888	0.0800866	0.166297	0.0223681	0.429003	-1.65952	54260440	Anti-EBV	64.6371	0.00762765	64.6371	64.6371	64.6371
71414969	-1.6014	0.583398	0.405807	0.396592	0.763529	0.341189	0.392092	0.776016	0.817575	-1.65952	71414969	Anti-EBV	58.2444	0.00686492	58.2444	58.2444	58.2444
53322921	-1.60027	0.401065	0.425576	0.148115	0.748426	0.258757	0.476722	0.592918	0.842049	-1.65952	53322921	Anti-EBV	56.7533	0.00668702	56.7533	56.7533	56.7533
9993207	-1.59998	0.0619165	0.327497	0.166455	0.0428764	0.197076	0.627749	0.548595	0.578693	-1.65952	9993207	Anti-EBV	39.7221	0.00465497	39.7221	39.7221	39.7221
154701265	-1.59295	0.515427	0.407924	0.547542	0.724527	0.283002	0.529106	0.790162	0.661967	-1.65952	154701265	Anti-EBV	49.9307	0.00587299	49.9307	49.9307	49.9307
326808	-1.59193	0.444184	0.336785	0.453039	-0.380144	0.149786	0.633981	0.834778	0.782649	-1.65952	326808	Anti-EBV	26.0581	0.00302469	26.0581	26.0581	26.0581
44329981	-1.59193	0.444184	0.336785	0.453039	-0.380144	0.149786	0.633981	0.834778	0.782649	-1.43736	44329981	Anti-EBV	10.3788	0.00115395	10.3788	10.3788	10.3788
125507539	-1.58904	0.184855	0.384286	0.0775382	0.855398	0.0336826	0.671681	0.440784	0.854891	-1.43736	125507539	Anti-EBV	22.082	0.00255029	22.082	22.082	22.082
353671	-1.58739	0.579307	0.286688	0.0680324	-0.483103	0.079667	0.251576	0.61607	0.286822	0.797938	353671	Hydrogel	2.34765	0.000195725	2.34765	2.34765	2.34765
131884918	-1.5869	0.483834	0.42874	0.286188	2.36596	0.242725	0.75254	0.90142	0.65366	-2.67894	131884918	Anti-EBV	5.82602	0.000610738	5.82602	5.82602	5.82602
67841326	-1.58651	0.404867	0.385381	0.297154	0.339622	0.0132297	0.546626	0.390703	0.819309	0.713884	67841326	Hydrogel	0.981892	3.27725e-05	0.981892	0.981892	0.981892
67841222	-1.58651	0.404867	0.385381	0.297154	0.339622	0.0132297	0.546626	0.390703	0.819309	-1.95621	67841222	Anti-EBV	8.07467	0.000879031	8.07467	8.07467	8.07467
92253393	-1.58592	0.367174	0.352728	0.0711092	0.0334298	0.0307656	0.0920818	0.0205935	0.386378	-1.1312	92253393	Anti-EBV	4.32906	0.000432132	4.32906	4.32906	4.32906
92253390	-1.58592	0.367174	0.352728	0.0711092	0.0334298	0.0307656	0.0920818	0.0205935	0.386378	-0.486518	92253390	Anti-EBV	1.37592	7.97853e-05	1.37592	1.37592	1.37592
125124867	-1.58592	0.367174	0.352728	0.0711092	0.0334298	0.0307656	0.0920818	0.0205935	0.386378	-1.01714	125124867	Anti-EBV	3.31912	0.000311633	3.31912	3.31912	3.31912
14608008	-1.58592	0.367174	0.352728	0.0711092	0.0334298	0.0307656	0.0920818	0.0205935	0.386378	-1.69136	14608008	Anti-EBV	22.4241	0.00259111	22.4241	22.4241	22.4241
3007223	-1.58554	0.886093	0.384166	0.448729	0.293241	0.0560212	0.725855	0.91639	0.807376	-1.69136	3007223	Anti-EBV	25.8118	0.0029953	25.8118	25.8118	25.8118
135524757	-1.58513	0.731134	0.445783	0.182439	0.324537	0.128503	0.341948	0.632685	0.758131	0.300127	135524757	Anti-EBV	0.725412	2.17118e-06	0.725412	0.725412	0.725412
121487038	-1.56847	0.363441	0.379692	0.178719	-0.356637	0.068047	0.0838875	0.027086	0.544879	-1.86402	121487038	Anti-EBV	6.50553	0.000691813	6.50553	6.50553	6.50553
100935585	-1.56847	0.363924	0.379578	0.176335	-0.356637	0.0692051	0.0849232	0.027086	0.544879	0.758829	100935585	Hydrogel	2.00883	0.0001553	2.00883	2.00883	2.00883
11749237	-1.56805	0.806108	0.41776	0.493608	1.59008	0.251708	0.583408	0.748661	0.592224	0.00594532	11749237	Anti-EBV	2.13041	0.000169806	2.13041	2.13041	2.13041
510999	-1.56345	0.688522	0.372496	0.120167	0.318307	0.331839	0.125592	0.0437792	0.503879	0.00594532	510999	Anti-EBV	0.988574	3.35697e-05	0.988574	0.988574	0.988574
136238397	-1.56295	0.884475	0.418996	0.144779	-0.633591	0.228585	0.178718	0.371426	0.538308	0.0611253	136238397	Hydrogel	1.76424	0.000126116	1.76424	1.76424	1.76424
516072	-1.55613	0.498258	0.324209	0.0285889	0.0545255	0.529856	0.657755	0.361862	0.583989	0.0611253	516072	Hydrogel	0.712895	6.77765e-07	0.712895	0.712895	0.712895
126915	-1.55321	0.623107	0.393367	0.063635	-0.313751	0.0672127	0.29909	0.291921	0.686402	0.0611253	126915	Hydrogel	1.13482	5.10193e-05	1.13482	1.13482	1.13482
11501773	-1.55258	0.639435	0.39771	0.440596	1.21292	0.338089	0.424491	0.828142	0.630289	0.0611253	11501773	Anti-EBV	1.7165	0.000120421	1.7165	1.7165	1.7165
5272753	-1.54769	0.778435	0.452777	0.0271904	0.59398	0.195225	0.238124	0.091174	0.442534	0.233228	5272753	Anti-EBV	0.993569	3.41658e-05	0.993569	0.993569	0.993569
3007224	-1.5466	0.72417	0.378047	0.453082	1.00554	0.0409739	0.634186	0.816157	0.804028	0.554972	3007224	Anti-EBV	1.0103	3.61618e-05	1.0103	1.0103	1.0103
92258444	-1.54564	0.297238	0.400515	0.0966211	0.574046	0.075366	0.582822	0.889129	0.838109	-0.718173	92258444	Anti-EBV	2.91558	0.000263487	2.91558	2.91558	2.91558
10828395	-1.54564	0.297238	0.400515	0.0966211	0.574046	0.075366	0.582822	0.889129	0.838109	-0.718173	10828395	Anti-EBV	2.91558	0.000263487	2.91558	2.91558	2.91558
121487333	-1.54237	0.796235	0.424603	0.216923	-0.640076	0.00785866	0.277646	0.041066	0.499793	-0.222806	121487333	Hydrogel	1.36109	7.80161e-05	1.36109	1.36109	1.36109
92243788	-1.54237	0.796235	0.424603	0.216923	-0.640076	0.00785866	0.277646	0.041066	0.499793	-0.239012	92243788	Hydrogel	1.33569	7.49855e-05	1.33569	1.33569	1.33569
59048458	-1.53996	0.141935	0.26327	0.0124906	-0.979606	0.390523	0.482851	0.748013	0.584722	0.659051	59048458	Hydrogel	4.84262	0.000493406	4.84262	4.84262	4.84262
469447	-1.53592	0.846826	0.444815	0.0889821	1.58224	0.310317	0.60381	0.437394	0.536719	-1.04787	469447	Anti-EBV	8.32806	0.000909264	8.32806	8.32806	8.32806
92243924	-1.53082	0.463604	0.397737	0.274247	0.18999	0.384593	0.70272	0.891682	0.852758	0.11477	92243924	Anti-EBV	0.771744	7.6991e-06	0.771744	0.771744	0.771744
121486913	-1.52935	0.0926972	0.390268	0.0243972	-0.107599	0.0811114	0.477354	0.5247	0.792254	-1.06455	121486913	Anti-EBV	3.61866	0.000347372	3.61866	3.61866	3.61866
134694066	-1.52762	0.657678	0.440643	0.190791	1.74858	0.327667	0.594905	0.744653	0.717473	-0.335594	134694066	Anti-EBV	3.17972	0.000295002	3.17972	3.17972	3.17972
29982328	-1.52762	0.657678	0.440643	0.190791	1.74858	0.327667	0.594905	0.744653	0.717473	0.220924	29982328	Anti-EBV	1.94265	0.000147403	1.94265	1.94265	1.94265
169662	-1.52762	0.657678	0.440643	0.190791	1.74858	0.327667	0.594905	0.744653	0.717473	-0.152028	169662	Anti-EBV	2.66105	0.000233118	2.66105	2.66105	2.66105
93604123	-1.52762	0.657678	0.440643	0.190791	1.74858	0.327667	0.594905	0.744653	0.717473	-0.152028	93604123	Anti-EBV	2.66105	0.000233118	2.66105	2.66105	2.66105
44356940	-1.52762	0.657678	0.440643	0.190791	1.74858	0.327667	0.594905	0.744653	0.717473	0.392178	44356940	Anti-EBV	1.70628	0.000119202	1.70628	1.70628	1.70628
12042143	-1.52762	0.657678	0.440643	0.190791	1.74858	0.327667	0.594905	0.744653	0.717473	0.392178	12042143	Anti-EBV	1.70628	0.000119202	1.70628	1.70628	1.70628
92845691	-1.52762	0.657678	0.440643	0.190791	1.74858	0.327667	0.594905	0.744653	0.717473	-1.75938	92845691	Anti-EBV	20.6969	0.00238503	20.6969	20.6969	20.6969
86288424	-1.52693	0.505749	0.364656	0.267364	0.717287	0.10169	0.16448	0.045323	0.514256	-1.90451	86288424	Anti-EBV	9.11225	0.00100283	9.11225	9.11225	9.11225
470049	-1.52632	0.865587	0.44709	0.076497	1.91192	0.350782	0.58979	0.471496	0.520363	-0.0656588	470049	Anti-EBV	2.62177	0.000228431	2.62177	2.62177	2.62177
465094	-1.52632	0.865587	0.44709		1.91192	0.350782	0.58979	0.471496	0.520363	-0.0656588	465094	Anti-EBV	2.62177	0.000228431	2.62177	2.62177	2.62177
139025281	-1.52626	0.379792	0.430687	0.165921	-0.402744	0.0766917	0.0963723	0.0296169	0.543001	-0.6551	139025281	Anti-EBV	1.11676	4.88636e-05	1.11676	1.11676	1.11676
71315149	-1.52626	0.379792	0.430687	0.165921	-0.402744	0.0766917	0.0963723	0.0296169	0.543001	-0.0300347	71315149	Hydrogel	1.17624	5.59603e-05	1.17624	1.17624	1.17624
7045516	-1.52536	0.784931	0.432264	0.125094	-0.730132	0.329578	0.637485	0.404121	0.535173	-0.0300347	7045516	Hydrogel	1.95211	0.000148532	1.95211	1.95211	1.95211
513124	-1.52536	0.784931	0.432264	0.125094	-0.730132	0.329578	0.637485	0.404121	0.535173	-0.0300347	513124	Hydrogel	1.95211	0.000148532	1.95211	1.95211	1.95211
513122	-1.52536	0.784931	0.432264	0.125094	-0.730132	0.329578	0.637485	0.404121	0.535173	-0.0300347	513122	Hydrogel	1.95211	0.000148532	1.95211	1.95211	1.95211
3010355	-1.51441	0.258443	0.451527	0.177694	1.27723	0.523237	0.421431	0.895896	0.552178	-0.0300347	3010355	Anti-EBV	1.95256	0.000148586	1.95256	1.95256	1.95256
57372617	-1.51198	0.502378	0.33635	0.0493764	0.467741	0.0337105	0.219804	0.0104967	0.301545	-0.0300347	57372617	Anti-EBV	1.18212	5.66623e-05	1.18212	1.18212	1.18212
15024543	-1.50659	0.21188	0.37172	0.102694	0.264678	0.0368086	0.509372	0.777593	0.797236	-0.991797	15024543	Anti-EBV	4.15872	0.000411809	4.15872	4.15872	4.15872
25266884	-1.50607	0.724287	0.445464	0.124546	-0.0520677	0.154335	0.535859	0.58025	0.422153	-1.91606	25266884	Anti-EBV	5.72224	0.000598357	5.72224	5.72224	5.72224
5278277	-1.50255	0.70077	0.447161	0.185981	0.684325	0.357155	0.514309	0.680107	0.73436	-1.91606	5278277	Anti-EBV	8.18601	0.000892316	8.18601	8.18601	8.18601
49784203	-1.49848	0.238929	0.417355	0.211993	2.13538	0.233556	0.704311	0.878941	0.842663	-0.718173	49784203	Anti-EBV	5.87872	0.000617027	5.87872	5.87872	5.87872
516074	-1.49758	0.750878	0.315753	0.0458092	0.218994	0.414429	0.533121	0.330366	0.468758	-0.718173	516074	Anti-EBV	2.40753	0.000202869	2.40753	2.40753	2.40753
10405378	-1.49453	0.728309	0.407808	0.266155	2.57929	0.186727	0.239272	0.398129	0.643475	-1.1415	10405378	Anti-EBV	15.6119	0.00177831	15.6119	15.6119	15.6119
90472732	-1.49262	0.360542	0.41438	0.170536	-0.311453	0.0674496	0.0839818	0.0269276	0.543918	-1.1415	90472732	Anti-EBV	4.05015	0.000398855	4.05015	4.05015	4.05015
3007218	-1.48929	0.316946	0.367158	0.145781	1.13096	0.0668294	0.338506	0.920652	0.784475	-1.1415	3007218	Anti-EBV	9.9473	0.00110246	9.9473	9.9473	9.9473
131858474	-1.48883	0.30106	0.437592	0.037421	2.18233	0.0267437	0.598887	0.89323	0.925636	-1.1415	131858474	Anti-EBV	14.2402	0.00161466	14.2402	14.2402	14.2402
131885132	-1.48686	0.246344	0.395136	0.0529342	0.643457	0.0479104	0.389423	0.729813	0.622497	-0.544632	131885132	Anti-EBV	2.49031	0.000212746	2.49031	2.49031	2.49031
14430336	-1.48518	0.368221	0.41865	0.0853323	0.133784	0.579966	0.544837	0.72356	0.661904	-1.95631	14430336	Anti-EBV	5.56664	0.000579792	5.56664	5.56664	5.56664
57348664	-1.48424	0.56415	0.415423	0.0807326	0.216593	0.115742	0.190191	0.0538306	0.390539	-0.422394	57348664	Anti-EBV	1.55812	0.000101524	1.55812	1.55812	1.55812
21817599	-1.48382	0.33769	0.431173	0.153493	-0.216443	0.0594726	0.422497	0.233897	0.506793	-1.86715	21817599	Anti-EBV	5.38263	0.000557836	5.38263	5.38263	5.38263
276394	-1.48382	0.33769	0.431173	0.153493	-0.216443	0.0594726	0.422497	0.233897	0.506793	-0.0868209	276394	Hydrogel	0.851737	1.72433e-05	0.851737	0.851737	0.851737
132663	-1.48376	0.66153	0.416983	0.573443	1.73893	0.533788	0.624935	0.880902	0.812083	0.265166	132663	Anti-EBV	1.8988	0.000142172	1.8988	1.8988	1.8988
92270653	-1.48251	0.579571	0.377587	0.105215	0.894905	0.551758	0.706678	0.472977	0.829715	-0.80851	92270653	Anti-EBV	4.28119	0.000426421	4.28119	4.28119	4.28119
500247	-1.48251	0.579571	0.377587	0.105215	0.894905	0.551758	0.706678	0.472977	0.829715	-0.0430486	500247	Anti-EBV	1.62859	0.000109932	1.62859	1.62859	1.62859
86592812	-1.47829	0.494149	0.442221	0.206582	1.44514	0.268145	0.488348	0.79241	0.698721	-0.718173	86592812	Anti-EBV	4.73192	0.000480199	4.73192	4.73192	4.73192
121596077	-1.47785	0.359669	0.420223	0.178719	-0.278272	0.0674496	0.0846441	0.0247113	0.543318	-0.777622	121596077	Anti-EBV	1.71559	0.000120312	1.71559	1.71559	1.71559
59051498	-1.47553	0.416777	0.365932	0.212818	0.679534	0.298531	0.225523	0.0427197	0.634271	-0.150671	59051498	Anti-EBV	1.59328	0.000105719	1.59328	1.59328	1.59328
29980301	-1.47553	0.416777	0.365932	0.212818	0.679534	0.298531	0.225523	0.0427197	0.634271	-0.0245471	29980301	Anti-EBV	1.39333	8.18623e-05	1.39333	1.39333	1.39333
20285	-1.47553	0.416777	0.365932	0.212818	0.679534	0.298531	0.225523	0.0427197	0.634271	-0.600145	20285	Anti-EBV	2.77442	0.000246644	2.77442	2.77442	2.77442
46875049	-1.47553	0.416777	0.365932	0.212818	0.679534	0.298531	0.225523	0.0427197	0.634271	0.139904	46875049	Anti-EBV	1.17951	5.63507e-05	1.17951	1.17951	1.17951
134694098	-1.47553	0.416777	0.365932	0.212818	0.679534	0.298531	0.225523	0.0427197	0.634271	-1.37872	134694098	Anti-EBV	30.7684	0.00358669	30.7684	30.7684	30.7684
16861	-1.47553	0.416777	0.365932	0.212818	0.679534	0.298531	0.225523	0.0427197	0.634271	-1.37872	16861	Anti-EBV	30.7684	0.00358669	30.7684	30.7684	30.7684
12896821	-1.47553	0.416777	0.365932	0.212818	0.679534	0.298531	0.225523	0.0427197	0.634271	-1.04951	12896821	Anti-EBV	6.4465	0.000684771	6.4465	6.4465	6.4465
135511145	-1.47424	0.922851	0.419635	0.253892	1.41579	0.426723	0.169274	0.918896	0.647608	-0.384348	135511145	Anti-EBV	3.04288	0.000278674	3.04288	3.04288	3.04288
472658	-1.47301	0.322389	0.419049	0.0833306	0.369005	0.107731	0.40025	0.650545	0.843716	-0.384348	472658	Anti-EBV	1.68572	0.000116748	1.68572	1.68572	1.68572
472640	-1.47301	0.322389	0.419049	0.0833306	0.369005	0.107731	0.40025	0.650545	0.843716	0.369152	472640	Hydrogel	0.707215	0	0.707215	0.707215	0.707215
6479521	-1.4682	0.145189	0.390465	0.0373096	-0.218051	0.0251902	0.265288	0.817691	0.622795	-0.718173	6479521	Anti-EBV	1.65008	0.000112496	1.65008	1.65008	1.65008
3010606	-1.46784	0.59935	0.380975	0.193789	0.646965	0.10803	0.291902	0.685841	0.484242	0.114024	3010606	Anti-EBV	1.18356	5.68335e-05	1.18356	1.18356	1.18356
498018	-1.46671	0.635098	0.405761	0.159985	0.386545	0.148519	0.379931	0.558298	0.84875	0.114024	498018	Anti-EBV	0.950911	2.90761e-05	0.950911	0.950911	0.950911
25197	-1.46593	0.574266	0.35095	0.16135	0.094982	0.630162	0.157533	0.0204131	0.511688	0.114024	25197	Hydrogel	0.724353	2.04476e-06	0.724353	0.724353	0.724353
240980	-1.46593	0.574266		0.16135	0.094982	0.630162	0.157533	0.0204131	0.511688	0.114024	240980	Hydrogel	0.724353	2.04476e-06	0.724353	0.724353	0.724353
515328	-1.46593	0.574266	0.35095	0.16135	0.094982	0.630162	0.157533	0.0204131	0.511688	0.114024	515328	Hydrogel	0.724353	2.04476e-06	0.724353	0.724353	0.724353
60140908	-1.46593	0.574266	0.35095	0.16135	0.094982	0.630162	0.157533	0.0204131	0.511688	0.114024	60140908	Hydrogel	0.724353	2.04476e-06	0.724353	0.724353	0.724353
76973118	-1.4638	0.720738	0.415818	0.0642423	-0.346238	0.00984283	0.0812538	0.0492818	0.679814	0.114024	76973118	Hydrogel	1.28953	6.94774e-05	1.28953	1.28953	1.28953
44150017	-1.46177	0.483449	0.405324	0.107538	0.0744785	0.0620566	0.45807	0.415326	0.815471	-0.350761	44150017	Anti-EBV	1.24838	6.4568e-05	1.24838	1.24838	1.24838
42607051	-1.46177	0.397526	0.404513	0.0612614	0.0610099	0.0472146	0.493133	0.392839	0.828066	-2.19265	42607051	Anti-EBV	3.65357	0.000351538	3.65357	3.65357	3.65357
15612873	-1.45225	0.503088	0.404706	0.244234	-0.844362	0.499966	0.488403	0.173999	0.536411	-2.19265	15612873	Anti-EBV	1.8682	0.00013852	1.8682	1.8682	1.8682
502232	-1.45191	0.422109	0.323157	0.0630317	0.975654	0.0658987	0.403575	0.744599	0.445334	-1.31021	502232	Anti-EBV	23.5188	0.00272171	23.5188	23.5188	23.5188
134067785	-1.4473	0.551643	0.449443	0.451843	1.73229	0.305398	0.583304	0.765015	0.624198	-0.311099	134067785	Anti-EBV	3.25044	0.000303439	3.25044	3.25044	3.25044
490683	-1.44704	0.431323	0.402019	0.201135	-0.705553	0.0656524	0.511814	0.273633	0.641403	0.0553419	490683	Hydrogel	2.15829	0.000173132	2.15829	2.15829	2.15829
490682	-1.44704	0.431323	0.402019	0.201135	-0.705553	0.0656524	0.511814	0.273633	0.641403	0.0460061	490682	Hydrogel	2.14049	0.000171008	2.14049	2.14049	2.14049
3011895	-1.44374	0.202295	0.409031	0.216886	-0.457619	0.275575	0.356614	0.543076	0.603084	0.0460061	3011895	Hydrogel	1.42935	8.61594e-05	1.42935	1.42935	1.42935
91927745	-1.44283	0.669092	0.380214	0.0669079	-0.290815	0.00834106	0.0987813	0.0416407	0.675501	0.0460061	91927745	Hydrogel	1.12057	4.93191e-05	1.12057	1.12057	1.12057
14408976	-1.43967	0.47619	0.390621	0.0811347	1.51626	0.232885	0.554413	0.426702	0.601405	0.0460061	14408976	Anti-EBV	2.10661	0.000166966	2.10661	2.10661	2.10661
21144622	-1.43949	0.129677	0.424513	0.0461221	2.36469	0.108868	0.677155	0.954987	0.636987	0.797938	21144622	Anti-EBV	1.69739	0.000118141	1.69739	1.69739	1.69739
5279426	-1.43725	0.401512	0.360688	0.0619372	-1.13282	0.276301	0.590596	0.599117	0.502824	-0.202962	5279426	Hydrogel	5.02656	0.000515353	5.02656	5.02656	5.02656
13009595	-1.43584	0.59772	0.42128	0.306492	0.262748	0.0664061	0.533351	0.586153	0.841269	-0.145404	13009595	Anti-EBV	1.1544	5.33544e-05	1.1544	1.1544	1.1544
5271785	-1.43527	0.420444	0.371126	0.36549	-0.478094	0.0767324	0.358536	0.516831	0.559035	-1.0696	5271785	Anti-EBV	2.99461	0.000272916	2.99461	2.99461	2.99461
49784137	-1.43511	0.357643	0.398959	0.175741	2.56286	0.182875	0.673871	0.89588	0.83727	-1.37868	49784137	Anti-EBV	99.4691	0.0117836	99.4691	99.4691	99.4691
92243975	-1.43457	0.247806	0.397792	0.0933507	0.500599	0.180047	0.557011	0.911963	0.824118	-4.3223	92243975	Anti-EBV	1.65482	0.000113061	1.65482	1.65482	1.65482
5273016	-1.43415	0.682443	0.364099	0.0399235	1.89118	0.0493314	0.374319	0.366514	0.762013	-0.832693	5273016	Anti-EBV	7.11163	0.000764128	7.11163	7.11163	7.11163
324310	-1.43415	0.496651	0.373078	0.197906	1.0472	0.0347069	0.442752	0.49049	0.812228	-0.832693	324310	Anti-EBV	5.12721	0.000527361	5.12721	5.12721	5.12721
475524	-1.43366	0.640957	0.377242	0.0873407	0.317628	0.0898104	0.255282	0.761988	0.444995	-2.6741	475524	Anti-EBV	2.70372	0.000238208	2.70372	2.70372	2.70372
461404	-1.43366	0.640957	0.377242	0.0873407	0.317628	0.0898104	0.255282	0.761988	0.444995	0.797938	461404	Hydrogel	1.09496	4.62631e-05	1.09496	1.09496	1.09496
16076142	-1.43358	0.260067	0.395631	0.0416332	0.555337	0.0565229	0.578077	0.964555	0.808917	-0.860095	16076142	Anti-EBV	4.19743	0.000416427	4.19743	4.19743	4.19743
49849608	-1.43352	0.368244	0.445195	0.176335	-0.156655	0.0697149	0.0847697	0.0276105	0.544044	-0.35792	49849608	Anti-EBV	0.971721	3.1559e-05	0.971721	0.971721	0.971721
455763	-1.43266	0.789378	0.418263	0.428647	1.11849	0.12675	0.52813	0.774435	0.680031	-1.95306	455763	Anti-EBV	7.6398	0.000827146	7.6398	7.6398	7.6398
512591	-1.42976	0.444174	0.395482	0.360577	-0.204252	0.173785	0.488552	0.875799	0.724875	-1.23762	512591	Anti-EBV	8.31234	0.000907389	8.31234	8.31234	8.31234
270861	-1.42911	0.414807		0.0533535	2.37571	0.0660136	0.495563	0.909978	0.804159	-0.857754	270861	Anti-EBV	8.71032	0.000954873	8.71032	8.71032	8.71032
470024	-1.42911	0.414807	0.405397	0.0533535	2.37571	0.0660136	0.495563	0.909978	0.804159	-0.250631	470024	Anti-EBV	3.85876	0.000376019	3.85876	3.85876	3.85876
14430375	-1.42582	0.766593	0.394482	0.266687	0.188982	0.547282	0.475043	0.816351	0.469294	-0.179171	14430375	Anti-EBV	1.12473	4.9815e-05	1.12473	1.12473	1.12473
452097	-1.42582	0.766593	0.394482	0.266687	0.188982	0.547282	0.475043	0.816351	0.469294	-0.101144	452097	Anti-EBV	1.01683	3.69414e-05	1.01683	1.01683	1.01683
160067	-1.42577	0.443544	0.411346	0.108166	0.504198	0.152335	0.485028	0.43951	0.854101	-0.391129	160067	Anti-EBV	1.93087	0.000145998	1.93087	1.93087	1.93087
289971	-1.41522	0.54171	0.3562	0.310487	0.0991644	0.0737471	0.506786	0.502154	0.811375	-1.21658	289971	Anti-EBV	10.0735	0.00111752	10.0735	10.0735	10.0735
448403	-1.41522	0.54171	0.3562	0.310487	0.0991644	0.0737471	0.506786	0.502154	0.811375	-1.21658	448403	Anti-EBV	10.0735	0.00111752	10.0735	10.0735	10.0735
129862	-1.41482	0.489936	0.40307	0.0876016	0.419056	0.118698	0.439699	0.444553	0.666156	-0.806033	129862	Anti-EBV	3.55289	0.000339525	3.55289	3.55289	3.55289
10264873	-1.4148	0.396543	0.408073	0.275122	-0.22466	0.114276	0.616278	0.337552	0.65235	-0.718173	10264873	Anti-EBV	1.70895	0.00011952	1.70895	1.70895	1.70895
13871050	-1.4142	0.60447	0.404756	0.383135	-1.19151	0.258956	0.193978	0.383147	0.45178	-0.221424	13871050	Hydrogel	6.86724	0.00073497	6.86724	6.86724	6.86724
512601	-1.41179	0.12961	0.416634	0.233254	2.72235	0.0624397	0.492462	0.594927	0.476722	-0.734162	512601	Anti-EBV	7.92069	0.00086066	7.92069	7.92069	7.92069
9942889	-1.41137	0.352563	0.348413	0.0963756	-0.462184	0.387906	0.179173	0.0684444	0.475613	0.460831	9942889	Hydrogel	2.0823	0.000164065	2.0823	2.0823	2.0823
15955042	-1.40976	0.640716	0.388129	0.310586	0.650437	0.337767	0.51113	0.924828	0.76632	-1.48246	15955042	Anti-EBV	40.7794	0.00478112	40.7794	40.7794	40.7794
9562214	-1.40857	0.433335	0.432273	0.229141	0.849929	0.509357	0.667745	0.863175	0.866695	-1.48246	9562214	Anti-EBV	43.9252	0.00515645	43.9252	43.9252	43.9252
92236380	-1.40857	0.433335	0.432273	0.229141	0.849929	0.509357	0.667745	0.863175	0.866695	-1.17237	92236380	Anti-EBV	12.8146	0.00144456	12.8146	12.8146	12.8146
131876195	-1.40857	0.433335	0.432273	0.229141	0.849929	0.509357	0.667745	0.863175	0.866695	-1.17237	131876195	Anti-EBV	12.8146	0.00144456	12.8146	12.8146	12.8146
516086	-1.40846	0.0521205	0.345143	0.02892	-0.517661	0.243091	0.351395	0.540755	0.590861	-0.0230822	516086	Hydrogel	1.49227	9.3667e-05	1.49227	1.49227	1.49227
51360252	-1.40782	0.285424	0.369241	0.276273	-0.460019	0.178513		0.0195267	0.505293	-0.0833712	51360252	Hydrogel	1.26908	6.7038e-05	1.26908	1.26908	1.26908
71380931	-1.40494	0.252931	0.3485	0.178132	1.20258	0.18166	0.644007	0.660365	0.748026	-0.0833712	71380931	Anti-EBV	2.08318	0.00016417	2.08318	2.08318	2.08318
510973	-1.4047	0.447534	0.365957	0.178491	0.840455	0.595004	0.127455	0.0295799	0.618083	0.127237	510973	Anti-EBV	1.36551	7.85426e-05	1.36551	1.36551	1.36551
490626	-1.40278	0.808448	0.401844	0.234168	0.262267	0.158785	0.640437	0.47242	0.65074	-0.500815	490626	Anti-EBV	1.90353	0.000142736	1.90353	1.90353	1.90353
464376	-1.39786	0.319777	0.400882	0.4163	0.277647	0.348866	0.395818	0.719735	0.635702	0.0533344	464376	Anti-EBV	0.925694	2.60674e-05	0.925694	0.925694	0.925694
451873	-1.39726	0.607674	0.352117	0.155643	-0.807542	0.119161	0.369737	0.376641	0.682725	-1.1814	451873	Anti-EBV	3.15625	0.000292202	3.15625	3.15625	3.15625
67860541	-1.39726	0.607674	0.352117	0.155643	-0.807542	0.119161	0.369737	0.376641	0.682725	-0.0506238	67860541	Hydrogel	2.52222	0.000216553	2.52222	2.52222	2.52222
46780426	-1.39593	0.795846	0.45239	0.546257	0.120986	0.101968	0.114598	0.0725207	0.534128	-0.354497	46780426	Anti-EBV	1.35277	7.70234e-05	1.35277	1.35277	1.35277
133688245	-1.39593	0.795846	0.45239	0.546257	0.120986	0.101968	0.114598	0.0725207	0.534128	0.0111242	133688245	Anti-EBV	0.81752	1.31608e-05	0.81752	0.81752	0.81752
134481	-1.39526	0.232966	0.381093	0.157096	1.12056	0.0197003	0.0959978	0.0245287	0.435762	0.0111242	134481	Anti-EBV	1.8227	0.000133091	1.8227	1.8227	1.8227
7308567	-1.39526	0.232966	0.381093		1.12056	0.0197003	0.0959978	0.0245287	0.435762	0.0111242	7308567	Anti-EBV	1.8227	0.000133091	1.8227	1.8227	1.8227
67175601	-1.39232	0.376498	0.3772	0.250508	0.0183995	0.0199468	0.145242	0.0481561	0.475882	-1.20189	67175601	Anti-EBV	9.76875	0.00108116	9.76875	9.76875	9.76875
154809499	-1.39004	0.795663	0.403955	0.0549419	0.666381	0.243257	0.34277	0.56089	0.32151	-0.766226	154809499	Anti-EBV	3.95479	0.000387478	3.95479	3.95479	3.95479
54506098	-1.38856	0.454445	0.412608	0.122502	-0.139828	0.0573632	0.119093	0.0412098	0.494152	-2.10542	54506098	Anti-EBV	3.17053	0.000293906	3.17053	3.17053	3.17053
70684952	-1.38835	0.554003	0.407988	0.0896464	0.168231	0.0659353	0.492966	0.329268	0.842918	-1.3223	70684952	Anti-EBV	32.6165	0.00380719	32.6165	32.6165	32.6165
96410	-1.38835	0.554003	0.407988	0.0896464	0.168231	0.0659353	0.492966	0.329268	0.842918	-0.580934	96410	Anti-EBV	2.01926	0.000156544	2.01926	2.01926	2.01926
72212535	-1.38835	0.554003	0.407988	0.0896464	0.168231	0.0659353	0.492966	0.329268	0.842918	-1.32455	72212535	Anti-EBV	33.7908	0.00394729	33.7908	33.7908	33.7908
3009784	-1.38285	0.794599	0.332394	0.0757176	0.316511	0.0415619	0.32747	0.359361	0.818136	-0.453245	3009784	Anti-EBV	1.87811	0.000139703	1.87811	1.87811	1.87811
9992803	-1.38193	0.803176	0.421314	0.181529	0.799015	0.199222	0.174166	0.0616304	0.695635	-0.453245	9992803	Anti-EBV	2.61403	0.000227507	2.61403	2.61403	2.61403
58463518	-1.38094	0.545735	0.391005	0.305782	0.113699	0.0419589	0.0862657	0.0293062	0.388419	-1.65952	58463518	Anti-EBV	8.29437	0.000905245	8.29437	8.29437	8.29437
131885191	-1.38063	0.220198	0.431688	0.0536947	2.46007	0.127892	0.655342	0.945415	0.811711	-1.65952	131885191	Anti-EBV	20.182	0.00232359	20.182	20.182	20.182
97119	-1.37925	0.723856	0.394294	0.215178	0.584984	0.152815	0.344015	0.328759	0.722855	1.58249	97119	Hydrogel	1.42529	8.5675e-05	1.42529	1.42529	1.42529
510971	-1.37889	0.424176	0.365375	0.0706759	0.86341	0.17137	0.101117	0.0174725	0.495903	1.58249	510971	Hydrogel	1.16062	5.40973e-05	1.16062	1.16062	1.16062
3039710	-1.37545	0.313393	0.373708	0.15811	1.58387	0.145752	0.115647	0.928185	0.821967	-0.378624	3039710	Anti-EBV	3.49128	0.000332175	3.49128	3.49128	3.49128
57246734	-1.37539	0.880776	0.382717	0.345335	-0.356647	0.127481	0.448195	0.476902	0.749884	-1.27459	57246734	Anti-EBV	13.5836	0.00153632	13.5836	13.5836	13.5836
10849690	-1.37539	0.880776	0.382717	0.345335	-0.356647	0.127481	0.448195	0.476902	0.749884	0.558164	10849690	Hydrogel	1.97701	0.000151503	1.97701	1.97701	1.97701
9797705	-1.37473	0.131723	0.42285	0.148205	0.651581	0.243585	0.592082	0.918046	0.68213	0.264427	9797705	Anti-EBV	1.04112	3.98395e-05	1.04112	1.04112	1.04112
502229	-1.37298	0.585114	0.329289	0.0319279	0.0450064	0.0283868	0.391299	0.548533	0.716126	0.264427	502229	Hydrogel	0.925935	2.60962e-05	0.925935	0.925935	0.925935
92242775	-1.37278	0.793733	0.401777	0.468899	1.78314	0.372971	0.704684	0.928856	0.81315	0.264427	92242775	Anti-EBV	2.01894	0.000156506	2.01894	2.01894	2.01894
3006169	-1.37278	0.793733	0.401777	0.468899	1.78314	0.372971	0.704684	0.928856	0.81315	-0.402779	3006169	Anti-EBV	3.894	0.000380224	3.894	3.894	3.894
477413	-1.37262	0.613454	0.36647	0.16197	-0.405175	0.171214	0.0872156	0.0112904	0.511775	0.545517	477413	Hydrogel	2.09679	0.000165794	2.09679	2.09679	2.09679
9842606	-1.3696	0.426576	0.347327	0.562818	1.73513	0.46893	0.650675	0.914742	0.79041	-1.12181	9842606	Anti-EBV	17.012	0.00194537	17.012	17.012	17.012
121486815	-1.36861	0.352267	0.400608	0.0582062	0.558834	0.101292	0.521278	0.405884	0.687343	-0.385898	121486815	Anti-EBV	2.06663	0.000162196	2.06663	2.06663	2.06663
135618594	-1.36813	0.645223	0.408166	0.238932	-0.284003	0.0839804	0.13229	0.567052	0.59664	0.163341	135618594	Hydrogel	1.29064	6.96098e-05	1.29064	1.29064	1.29064
56671903	-1.36412	0.311737	0.411933	0.199942	1.98113	0.384876	0.597609	0.889554	0.849212	-0.097003	56671903	Anti-EBV	3.02645	0.000276715	3.02645	3.02645	3.02645
14806070	-1.36285	0.320532	0.384323	0.149244	-0.0928959	0.260111	0.449789	0.917618	0.51743	-0.148456	14806070	Anti-EBV	0.7718	7.70587e-06	0.7718	0.7718	0.7718
6476927	-1.3616	0.468473	0.393334	0.112249	-0.0435968	0.22972	0.563107	0.493039	0.8299	-0.216175	6476927	Anti-EBV	0.920172	2.54085e-05	0.920172	0.920172	0.920172
10037499	-1.36153	0.313259	0.306509	0.107315	0.909389	0.29412	0.193742	0.0414837	0.557432	-0.216175	10037499	Anti-EBV	2.09685	0.000165802	2.09685	2.09685	2.09685
59859763	-1.36153	0.313259	0.306509	0.107315	0.909389	0.29412	0.193742	0.0414837	0.557432	-0.293738	59859763	Anti-EBV	2.30053	0.000190103	2.30053	2.30053	2.30053
56995133	-1.36153	0.313259	0.306509	0.107315	0.909389	0.29412	0.193742	0.0414837	0.557432	-0.96975	56995133	Anti-EBV	7.48992	0.000809263	7.48992	7.48992	7.48992
29942411	-1.36153	0.313259	0.306509	0.107315	0.909389	0.29412	0.193742	0.0414837	0.557432	-1.0897	29942411	Anti-EBV	11.1067	0.00124079	11.1067	11.1067	11.1067
134694166	-1.36153	0.313259	0.306509	0.107315	0.909389	0.29412	0.193742	0.0414837	0.557432	-1.0897	134694166	Anti-EBV	11.1067	0.00124079	11.1067	11.1067	11.1067
67419448	-1.36153	0.313259	0.306509	0.107315	0.909389	0.29412	0.193742	0.0414837	0.557432	-0.179276	67419448	Anti-EBV	2.00934	0.00015536	2.00934	2.00934	2.00934
121606027	-1.3607	0.212016	0.414569	0.12517	0.646561	0.104558	0.277465	0.934981	0.611103	-2.22509	121606027	Anti-EBV	3.99111	0.000391811	3.99111	3.99111	3.99111
11208563	-1.3581	0.202543	0.387257	0.0422874	0.310268	0.0255613	0.381183	0.650483	0.647334	0.226327	11208563	Anti-EBV	0.782023	8.92562e-06	0.782023	0.782023	0.782023
92243772	-1.35656	0.687442	0.431261	0.330694	1.30182	0.281865	0.521778	0.779557	0.866126	0.644268	92243772	Anti-EBV	1.17187	5.5439e-05	1.17187	1.17187	1.17187
21818173	-1.35656	0.687442	0.431261	0.330694	1.30182	0.281865	0.521778	0.779557	0.866126	-0.0557035	21818173	Anti-EBV	2.1829	0.000176068	2.1829	2.1829	2.1829
135618698	-1.35476	0.72469	0.403385	0.144992	-0.0653859	0.0633313	0.151298	0.478322	0.62041	-0.469998	135618698	Anti-EBV	1.35382	7.71486e-05	1.35382	1.35382	1.35382
135856077	-1.35476	0.72469	0.403385	0.144992	-0.0653859	0.0633313	0.151298	0.478322	0.62041	0.0378603	135856077	Hydrogel	0.82034	1.34973e-05	0.82034	0.82034	0.82034
121486764	-1.3536	0.68522	0.431135	0.146414	0.615005	0.322604	0.42401	0.907301	0.841865	-1.02121	121486764	Anti-EBV	7.6684	0.000830558	7.6684	7.6684	7.6684
493442	-1.35307	0.438685	0.403117	0.249914	0.209447	0.292061	0.3556	0.660686	0.611667	-1.02121	493442	Anti-EBV	5.95128	0.000625684	5.95128	5.95128	5.95128
159738	-1.34961	0.342788	0.395116	0.256421	-0.517532	0.0752818	0.498877	0.507518	0.674184	-1.02121	159738	Anti-EBV	2.87601	0.000258766	2.87601	2.87601	2.87601
46936923	-1.34961	0.342788	0.395116	0.256421	-0.517532	0.0752818	0.498877	0.507518	0.674184	-1.02121	46936923	Anti-EBV	2.87601	0.000258766	2.87601	2.87601	2.87601
443234	-1.34805	0.333642	0.374903	0.139615	0.382918	0.102236	0.300417	0.211771	0.818428	-1.02121	443234	Anti-EBV	6.78243	0.000724852	6.78243	6.78243	6.78243
71317045	-1.34608	0.811018	0.462436	0.533464	0.104431	0.101968	0.112552	0.0699866	0.53654	-1.02121	71317045	Anti-EBV	5.60693	0.000584599	5.60693	5.60693	5.60693
11043124	-1.3417	0.256735	0.34069	0.204631	0.064321	0.136782	0.223529	0.336477	0.792093	0.397203	11043124	Hydrogel	1.04192	3.99345e-05	1.04192	1.04192	1.04192
131881043	-1.34167	0.432092	0.407081	0.180721	-0.137995	0.0702651	0.354402	0.714417	0.625403	-0.211096	131881043	Anti-EBV	0.798539	1.08961e-05	0.798539	0.798539	0.798539
25182693	-1.34052	0.532886	0.377748	0.158086	-1.07094	0.315146	0.367623	0.727836	0.748111	-0.328338	25182693	Hydrogel	4.60265	0.000464775	4.60265	4.60265	4.60265
67358	-1.33927	0.691344	0.399072	0.0842807	-0.0823651	0.189724	0.530865	0.308805	0.828472	-0.328338	67358	Anti-EBV	1.05119	4.10404e-05	1.05119	1.05119	1.05119
154731285	-1.33517	0.32086	0.306129	0.107315	0.973456	0.29412	0.188738	0.0421893	0.558192	0.423154	154731285	Anti-EBV	1.1497	5.27946e-05	1.1497	1.1497	1.1497
100417	-1.33341	0.571009	0.381964	0.214325	-0.559795	0.206531	0.499249	0.848511	0.716767	0.423154	100417	Hydrogel	2.50395	0.000214373	2.50395	2.50395	2.50395
21144431	-1.33109	0.678342	0.421061	0.224459	0.767506	0.160265	0.532499	0.792264	0.918304	-0.867578	21144431	Anti-EBV	5.69576	0.000595197	5.69576	5.69576	5.69576
419564	-1.33109	0.678342	0.421061	0.224459	0.767506	0.160265	0.532499	0.792264	0.918304	-1.79454	419564	Anti-EBV	7.11067	0.000764015	7.11067	7.11067	7.11067
13830101	-1.33079	0.35977	0.439707	0.362885	0.840861	0.0875333	0.582115	0.882987	0.751888	-0.0656793	13830101	Anti-EBV	1.72047	0.000120895	1.72047	1.72047	1.72047
128252	-1.32947	0.111128	0.326134	0.174615	-0.158974	0.11426	0.459629	0.825033	0.759103	-0.0656793	128252	Hydrogel	0.819817	1.34349e-05	0.819817	0.819817	0.819817
21817596	-1.32688	0.317557	0.444525	0.108773	-1.45072	0.0659528	0.304541	0.389039	0.456134	0.20326	21817596	Hydrogel	18.1785	0.00208455	18.1785	18.1785	18.1785
276398	-1.32688	0.317557	0.444525	0.108773	-1.45072	0.0659528	0.304541	0.389039	0.456134	-1.65952	276398	Nontox	1.54579	0.000100052	1.54579	1.54579	1.54579
92237069	-1.32688	0.317557	0.444525	0.108773	-1.45072	0.0659528	0.304541	0.389039	0.456134	-0.126545	92237069	Hydrogel	14.4127	0.00163524	14.4127	14.4127	14.4127
131864833	-1.32629	0.458229	0.361309	0.210523	-0.0751954	0.126367	0.147072	0.0676743	0.486639	-0.725991	131864833	Anti-EBV	2.24023	0.000182908	2.24023	2.24023	2.24023
352989	-1.32629	0.458229	0.361309	0.210523	-0.0751954	0.126367	0.147072	0.0676743	0.486639	-0.803946	352989	Anti-EBV	2.68007	0.000235387	2.68007	2.68007	2.68007
57357987	-1.32463	0.312002	0.415698	0.122502	-0.268562	0.134452	0.117961	0.0578273	0.561008	0.406001	57357987	Hydrogel	1.61041	0.000107763	1.61041	1.61041	1.61041
21140332	-1.32256	0.381644	0.414595	0.262382	-1.10595	0.183856	0.369696	0.478545	0.513559	-1.02121	21140332	Hydrogel	1.26028	6.59875e-05	1.26028	1.26028	1.26028
10999973	-1.31411	0.31519	0.372023	0.0801239	-0.45305	0.38472	0.331403	0.383799	0.453857	0.530363	10999973	Hydrogel	2.32223	0.000192692	2.32223	2.32223	2.32223
127260544	-1.31234	0.577207	0.411236	0.0877785	0.690973	0.059552	0.407066	0.340678	0.848685	0.299098	127260544	Anti-EBV	1.05101	4.10193e-05	1.05101	1.05101	1.05101
71407380	-1.31234	0.577207	0.411236	0.0877785	0.690973	0.059552	0.407066	0.340678	0.848685	0.299098	71407380	Anti-EBV	1.05101	4.10193e-05	1.05101	1.05101	1.05101
16226669	-1.31153	0.484094	0.381833	0.0913248	0.29589	0.0136473	0.0416851	0.0249002	0.454068	0.430191	16226669	Hydrogel	0.825258	1.40841e-05	0.825258	0.825258	0.825258
25796514	-1.31153	0.484094	0.381833	0.0913248	0.29589	0.0136473	0.0416851	0.0249002	0.454068	-1.90938	25796514	Anti-EBV	4.50938	0.000453647	4.50938	4.50938	4.50938
59116124	-1.31153	0.484094	0.381833	0.0913248	0.29589	0.0136473	0.0416851	0.0249002	0.454068	-1.17344	59116124	Anti-EBV	15.7534	0.0017952	15.7534	15.7534	15.7534
12358445	-1.31153	0.484094	0.381833	0.0913248	0.29589	0.0136473	0.0416851	0.0249002	0.454068	-1.17344	12358445	Anti-EBV	15.7534	0.0017952	15.7534	15.7534	15.7534
7035901	-1.31153	0.484094	0.381833	0.0913248	0.29589	0.0136473	0.0416851	0.0249002	0.454068	-1.17344	7035901	Anti-EBV	15.7534	0.0017952	15.7534	15.7534	15.7534
513034	-1.30922	0.269455	0.413571	0.0235877	2.24285	0.317975	0.359787	0.719386	0.616182	0.644819	513034	Anti-EBV	1.86365	0.000137977	1.86365	1.86365	1.86365
493439	-1.30756	0.682604	0.372236	0.439744	0.134227	0.396582	0.300191	0.636773	0.488447	0.908003	493439	Hydrogel	1.46607	9.0541e-05	1.46607	1.46607	1.46607
57368268	-1.30607	0.408453	0.341814	0.273721	0.189694	0.204143	0.561657	0.730015	0.396398	-0.319104	57368268	Anti-EBV	1.43614	8.69697e-05	1.43614	1.43614	1.43614
14209054	-1.30573	0.268736	0.386214	0.109198	-0.0837307	0.0641987	0.0413187	0.0224816	0.392851	-0.14086	14209054	Anti-EBV	0.776456	8.26132e-06	0.776456	0.776456	0.776456
6482479	-1.30573	0.268736	0.386214	0.109198	-0.0837307	0.0641987	0.0413187	0.0224816	0.392851	0.214318	6482479	Hydrogel	1.05202	4.11401e-05	1.05202	1.05202	1.05202
97107236	-1.30573	0.268736	0.386214	0.109198	-0.0837307	0.0641987	0.0413187	0.0224816	0.392851	0.214318	97107236	Hydrogel	1.05202	4.11401e-05	1.05202	1.05202	1.05202
92978664	-1.30573	0.268736	0.386214	0.109198	-0.0837307	0.0641987	0.0413187	0.0224816	0.392851	1.34466	92978664	Hydrogel	2.36014	0.000197215	2.36014	2.36014	2.36014
452892	-1.30076	0.692698	0.421041	0.24469	-0.43883	0.0314085	0.100071	0.0286299	0.566743	1.34466	452892	Hydrogel	3.63331	0.000349121	3.63331	3.63331	3.63331
3035491	-1.30023	0.726106	0.38654	0.0812979	-0.31246	0.537585	0.233572	0.395649	0.630177	1.34466	3035491	Hydrogel	3.07961	0.000283057	3.07961	3.07961	3.07961
45039906	-1.30023	0.726106	0.38654	0.0812979	-0.31246	0.537585	0.233572	0.395649	0.630177	1.34466	45039906	Hydrogel	3.07961	0.000283057	3.07961	3.07961	3.07961
93977460	-1.30023	0.726106	0.38654	0.0812979	-0.31246	0.537585	0.233572	0.395649	0.630177	1.34466	93977460	Hydrogel	3.07961	0.000283057	3.07961	3.07961	3.07961
10615718	-1.29475	0.251287	0.372338	0.0555061	0.88243	0.274051	0.280882	0.25568	0.780231	1.34466	10615718	Hydrogel	1.00734	3.58093e-05	1.00734	1.00734	1.00734
12939904	-1.29475	0.251287	0.372338	0.0555061	0.88243	0.274051	0.280882	0.25568	0.780231	-1.51767	12939904	Anti-EBV	14.5184	0.00164785	14.5184	14.5184	14.5184
44316328	-1.29462	0.27209	0.389792	0.440143	-0.144327	0.269944	0.0948259	0.0897601	0.542299	-1.99036	44316328	Anti-EBV	3.04522	0.000278954	3.04522	3.04522	3.04522
500902	-1.29462	0.27209	0.389792	0.440143	-0.144327	0.269944	0.0948259	0.0897601	0.542299	-0.295596	500902	Anti-EBV	0.92123	2.55347e-05	0.92123	0.92123	0.92123
92845515	-1.29462	0.27209	0.389792	0.440143	-0.144327	0.269944	0.0948259	0.0897601	0.542299	1.03908	92845515	Hydrogel	2.16201	0.000173575	2.16201	2.16201	2.16201
59844438	-1.29462	0.27209	0.389792	0.440143	-0.144327	0.269944	0.0948259	0.0897601	0.542299	1.03908	59844438	Hydrogel	2.16201	0.000173575	2.16201	2.16201	2.16201
13871033	-1.29462	0.27209	0.389792	0.440143	-0.144327	0.269944	0.0948259	0.0897601	0.542299	1.03908	13871033	Hydrogel	2.16201	0.000173575	2.16201	2.16201	2.16201
13871035	-1.29462	0.27209	0.389792	0.440143	-0.144327	0.269944	0.0948259	0.0897601	0.542299	1.03908	13871035	Hydrogel	2.16201	0.000173575	2.16201	2.16201	2.16201
60122232	-1.29462	0.27209	0.389792	0.440143	-0.144327	0.269944	0.0948259	0.0897601	0.542299	0.959294	60122232	Hydrogel	2.06392	0.000161872	2.06392	2.06392	2.06392
97467	-1.29345	0.560955	0.410974	0.0756746	-0.160197	0.109926	0.326377	0.20374	0.689486	0.421766	97467	Hydrogel	1.43333	8.6635e-05	1.43333	1.43333	1.43333
277139	-1.29345	0.560955	0.410974	0.0756746	-0.160197	0.109926	0.326377	0.20374	0.689486	0.421766	277139	Hydrogel	1.43333	8.6635e-05	1.43333	1.43333	1.43333
92238006	-1.29345	0.560955	0.410974	0.0756746	-0.160197	0.109926	0.326377	0.20374	0.689486	0.421766	92238006	Hydrogel	1.43333	8.6635e-05	1.43333	1.43333	1.43333
510972	-1.29124	0.429652	0.368826	0.318923	0.453163	0.220362	0.0943728	0.0380527	0.521306	-0.167814	510972	Anti-EBV	1.4888	9.32531e-05	1.4888	1.4888	1.4888
13566112	-1.28788	0.892543	0.448467	0.221921	0.683136	0.021129	0.267258	0.0373154	0.472686	-0.167814	13566112	Anti-EBV	1.7815	0.000128176	1.7815	1.7815	1.7815
54021277	-1.28645	0.356433	0.374033	0.19856	-0.128786	0.122787	0.13305	0.038025	0.488376	-2.50057	54021277	Anti-EBV	2.05554	0.000160872	2.05554	2.05554	2.05554
11010214	-1.28633	0.32103	0.410984	0.0959847	-0.197583	0.0130124	0.0469197	0.0173287	0.424832	-2.50057	11010214	Anti-EBV	1.97513	0.000151279	1.97513	1.97513	1.97513
506146	-1.28627	0.863447	0.445395	0.167492	-0.395162	0.180635	0.549832	0.308105	0.555197	-2.50057	506146	Anti-EBV	1.7449	0.000123809	1.7449	1.7449	1.7449
86592813	-1.28536	0.402559	0.446548	0.249735	0.915425	0.402523	0.407124	0.802046	0.689235	-2.50057	86592813	Anti-EBV	3.26827	0.000305566	3.26827	3.26827	3.26827
453757	-1.28426	0.547131	0.321845	0.00621469	-2.00576	0.510848	0.244994	0.634419	0.705954	-2.50057	453757	Nontox	2.76912	0.000246012	2.76912	2.76912	2.76912
451961	-1.28409	0.299034	0.351341	0.0537465	-1.4275	0.927307	0.538582	0.403054	0.707092	-2.50057	451961	Nontox	0.896097	2.25361e-05	0.896097	0.896097	0.896097
5272660	-1.28348	0.567039	0.408731	0.171382	0.25514	0.0589322	0.473271	0.187176	0.698002	-2.50057	5272660	Anti-EBV	2.49489	0.000213292	2.49489	2.49489	2.49489
21069732	-1.28085	0.579324	0.406328	0.550077	1.72465	0.230044	0.597169	0.9201	0.824759	0.0932415	21069732	Anti-EBV	2.38613	0.000200316	2.38613	2.38613	2.38613
100935581	-1.27869	0.326643	0.380994	0.101026	-0.237152	0.0131789	0.0479856	0.017049	0.423279	0.216663	100935581	Hydrogel	1.32328	7.35047e-05	1.32328	1.32328	1.32328
151772	-1.27869	0.328784	0.381473	0.0931607	-0.304321	0.0118501	0.0469918	0.0185111	0.423209	0.216663	151772	Hydrogel	1.46325	9.02043e-05	1.46325	1.46325	1.46325
21157436	-1.27775	0.266532	0.379842	0.148072	1.96198	0.440084	0.537301	0.89074	0.842593	0.216663	21157436	Anti-EBV	2.35874	0.000197048	2.35874	2.35874	2.35874
138113809	-1.27469	0.696231	0.358975		0.0200125	0.032086	0.089634	0.0307334	0.386851	-1.97905	138113809	Anti-EBV	3.30655	0.000310134	3.30655	3.30655	3.30655
127258181	-1.27469	0.696231	0.358975	0.203982	0.0200125	0.032086	0.089634	0.0307334	0.386851	-0.0770719	127258181	Anti-EBV	0.82174	1.36643e-05	0.82174	0.82174	0.82174
93055319	-1.27305	0.332043	0.391789	0.164252	-0.384963	0.0704937	0.675615	0.369351	0.671203	1.56632	93055319	Hydrogel	3.81434	0.000370719	3.81434	3.81434	3.81434
23190	-1.27305	0.332043	0.391789	0.164252	-0.384963	0.0704937	0.675615	0.369351	0.671203	0.905574	23190	Hydrogel	2.76215	0.000245181	2.76215	2.76215	2.76215
12769724	-1.27305	0.332043	0.391789	0.164252	-0.384963	0.0704937	0.675615	0.369351	0.671203	-1.10718	12769724	Anti-EBV	6.86431	0.000734621	6.86431	6.86431	6.86431
44386188	-1.27305	0.332043	0.391789	0.164252	-0.384963	0.0704937	0.675615	0.369351	0.671203	-0.793188	44386188	Anti-EBV	1.91015	0.000143525	1.91015	1.91015	1.91015
121011847	-1.27178	0.33868	0.38978	0.0477543	-0.203707	0.0308658	0.202481	0.768728	0.48737	-1.40355	121011847	Anti-EBV	12.1685	0.00136748	12.1685	12.1685	12.1685
13830104	-1.27084	0.342353	0.431758	0.230245	1.17683	0.0859032	0.606977	0.898505	0.737042	-1.38088	13830104	Anti-EBV	32.1621	0.00375297	32.1621	32.1621	32.1621
512291	-1.27022	0.76897	0.375693		0.0548177	0.278037	0.542658	0.904596	0.807386	-0.103277	512291	Anti-EBV	0.898691	2.28456e-05	0.898691	0.898691	0.898691
516066	-1.26825	0.727077	0.324415	0.0368363	-0.531752	0.457973	0.506651	0.18048	0.4917	-2.60754	516066	Anti-EBV	1.48479	9.27752e-05	1.48479	1.48479	1.48479
6102683	-1.26753	0.696211	0.389195	0.0559173	-0.843957	0.190467	0.128941	0.265357	0.543001	0.905574	6102683	Hydrogel	6.54823	0.000696908	6.54823	6.54823	6.54823
92043551	-1.26698	0.321737	0.381526	0.0959847	-0.270558	0.012805	0.0463412	0.0179284	0.422252	0.905574	92043551	Hydrogel	2.37635	0.000199149	2.37635	2.37635	2.37635
126969140	-1.26698	0.323653	0.381589	0.0959847	-0.297003	0.0118501	0.0463412	0.0172317	0.422252	-1.42055	126969140	Anti-EBV	9.6389	0.00106566	9.6389	9.6389	9.6389
71772549	-1.26698	0.323653	0.381589	0.0959847	-0.297003	0.0118501	0.0463412	0.0172317	0.422252	0.0735387	71772549	Hydrogel	1.24733	6.44431e-05	1.24733	1.24733	1.24733
512708	-1.26163	0.60152	0.357	0.0274528	-1.36892	0.229597	0.389993	0.659053	0.649175	0.0735387	512708	Hydrogel	18.3042	0.00209954	18.3042	18.3042	18.3042
54558447	-1.26141	0.485769	0.341726	0.141434	0.325087	0.122044	0.0739242	0.023168	0.486112	-0.291694	54558447	Anti-EBV	1.60658	0.000107306	1.60658	1.60658	1.60658
49784134	-1.25671	0.268014	0.426614	0.160197	1.47012	0.437949	0.552121	0.92875	0.842198	-0.291694	49784134	Anti-EBV	3.28896	0.000308035	3.28896	3.28896	3.28896
12777819	-1.25578	0.583695	0.338727	0.0582817	-1.18298	0.143949	0.24836	0.701225	0.289126	-0.291694	12777819	Hydrogel	18.0162	0.00206518	18.0162	18.0162	18.0162
93515751	-1.25578	0.583695	0.338727	0.0582817	-1.18298	0.143949	0.24836	0.701225	0.289126	-0.291694	93515751	Hydrogel	18.0162	0.00206518	18.0162	18.0162	18.0162
11447886	-1.2557	0.266363	0.371666	0.121682	-0.38203	0.0407648	0.0772624	0.0110533	0.393313	-1.92052	11447886	Anti-EBV	2.5655	0.000221717	2.5655	2.5655	2.5655
49784438	-1.24974	0.316142	0.427416	0.169913	1.63643	0.270845	0.566851	0.907773	0.8552	-1.30612	49784438	Anti-EBV	73.0798	0.00863497	73.0798	73.0798	73.0798
165148	-1.24674	0.323307	0.381528	0.105801	-0.201255	0.0118501	0.0471372	0.0167182	0.42222	0.58181	165148	Hydrogel	1.76633	0.000126366	1.76633	1.76633	1.76633
167877	-1.24674	0.323431	0.381623	0.089666	-0.297003	0.0118501	0.0466773	0.0174281	0.42222	0.5719	167877	Hydrogel	2.00093	0.000154357	2.00093	2.00093	2.00093
121487065	-1.24674	0.321475	0.381676	0.101026	-0.237152	0.0118501	0.0489497	0.0161232	0.42222	0.5719	121487065	Hydrogel	1.84039	0.000135202	1.84039	1.84039	1.84039
121597152	-1.24629	0.595014	0.358338	0.209462	0.0733598	0.115222	0.362341	0.421101	0.479763	0.5719	121597152	Hydrogel	1.24136	6.37303e-05	1.24136	1.24136	1.24136
92237642	-1.24629	0.595014	0.358338	0.209462	0.0733598	0.115222	0.362341	0.421101	0.479763	-1.0945	92237642	Anti-EBV	11.5869	0.00129808	11.5869	11.5869	11.5869
97300838	-1.24514	0.404568	0.388422	0.234821	-0.432577	0.0305848	0.238723	0.0771984	0.46371	0.455778	97300838	Hydrogel	2.25319	0.000184454	2.25319	2.25319	2.25319
12940782	-1.24453	0.304176	0.383095	0.13107	-0.37265	0.234046	0.06218	0.0378515	0.498277	0.905574	12940782	Hydrogel	2.78037	0.000247354	2.78037	2.78037	2.78037
191831	-1.24453	0.304176	0.383095	0.13107	-0.37265	0.234046	0.06218	0.0378515	0.498277	0.905574	191831	Hydrogel	2.78037	0.000247354	2.78037	2.78037	2.78037
6482480	-1.24453	0.304176	0.383095	0.13107	-0.37265	0.234046	0.06218	0.0378515	0.498277	0.905574	6482480	Hydrogel	2.78037	0.000247354	2.78037	2.78037	2.78037
354916	-1.24442	0.641799	0.396213	0.0640614	-0.0040847	0.0767968	0.223191	0.419833	0.745782	-0.429251	354916	Anti-EBV	1.44469	8.79902e-05	1.44469	1.44469	1.44469
5278280	-1.24299	0.63597	0.44252	0.202796	1.28975	0.197108	0.467892	0.713569	0.686811	1.59063	5278280	Hydrogel	0.875107	2.00317e-05	0.875107	0.875107	0.875107
100416	-1.24168	0.77731	0.376944	0.42594	0.264838	0.147131	0.563233	0.869265	0.749115	-0.421785	100416	Anti-EBV	1.89141	0.00014129	1.89141	1.89141	1.89141
65561	-1.24149	0.723678	0.35804		-0.187288	0.00960489	0.107674	0.0220992	0.483022	-1.83425	65561	Anti-EBV	3.22217	0.000300066	3.22217	3.22217	3.22217
5271378	-1.24149	0.723678	0.35804	0.0937476	-0.187288	0.00960489	0.107674	0.0220992	0.483022	-1.83425	5271378	Anti-EBV	3.22217	0.000300066	3.22217	3.22217	3.22217
129389389	-1.2376	0.634474	0.491583	0.0888295	2.55425	0.117363	0.283189	0.514655	0.619462	0.209445	129389389	Anti-EBV	2.99869	0.000273402	2.99869	2.99869	2.99869
516079	-1.23751	0.570467	0.337335	0.0503873	0.433754	0.542174	0.619263	0.479307	0.609614	0.335292	516079	Anti-EBV	0.795633	1.05495e-05	0.795633	0.795633	0.795633
516084	-1.23751	0.570467	0.337335	0.0503873	0.433754	0.542174	0.619263	0.479307	0.609614	-0.586782	516084	Anti-EBV	2.92495	0.000264605	2.92495	2.92495	2.92495
21824454	-1.23681	0.734611	0.369664	0.169493	-0.366214	0.133977	0.120201	0.0265326	0.589092	0.905574	21824454	Hydrogel	2.77298	0.000246473	2.77298	2.77298	2.77298
11057044	-1.23485	0.716292	0.414453	0.162524	1.11912	0.416867	0.24165	0.796734	0.509831	0.905574	11057044	Anti-EBV	0.848196	1.68209e-05	0.848196	0.848196	0.848196
121013684	-1.23485	0.716292	0.414453	0.162524	1.11912	0.416867	0.24165	0.796734	0.509831	0.905574	121013684	Anti-EBV	0.848196	1.68209e-05	0.848196	0.848196	0.848196
90472731	-1.23237	0.324838	0.417547	0.0959847	-0.236886	0.0138892	0.0447635	0.0187127	0.42262	-0.185804	90472731	Hydrogel	0.779664	8.64413e-06	0.779664	0.779664	0.779664
512590	-1.2277	0.477409	0.392072	0.409288	0.255769	0.301685	0.582214	0.901598	0.735226	-0.185804	512590	Anti-EBV	1.30646	7.14971e-05	1.30646	1.30646	1.30646
5273527	-1.22665	0.316045	0.413808	0.126544	-0.339418	0.172158	0.53514	0.496085	0.641073	0.567054	5273527	Hydrogel	2.15195	0.000172375	2.15195	2.15195	2.15195
6509777	-1.22586	0.206146	0.454332	0.372491	3.84434	0.412685	0.634475	0.940343	0.833975	-0.678064	6509777	Anti-EBV	12.3821	0.00139296	12.3821	12.3821	12.3821
9835398	-1.22514	0.267828	0.409991	0.353599	-0.412215	0.616631	0.464745	0.629417	0.789431	-0.678064	9835398	Anti-EBV	1.3943	8.19777e-05	1.3943	1.3943	1.3943
3011893	-1.22514	0.267828	0.409991	0.353599	-0.412215	0.616631	0.464745	0.629417	0.789431	-0.678064	3011893	Anti-EBV	1.3943	8.19777e-05	1.3943	1.3943	1.3943
9878094	-1.22451	0.266076	0.364628	0.149259	-0.112012	0.178262	0.0585286	0.0250373	0.418515	-0.565944	9878094	Anti-EBV	1.68186	0.000116287	1.68186	1.68186	1.68186
49784136	-1.22157	0.316279	0.429986	0.206788	1.74512	0.317686	0.619244	0.881616	0.844097	-0.578465	49784136	Anti-EBV	5.81664	0.000609619	5.81664	5.81664	5.81664
71761524	-1.22077	0.811392	0.371091		-0.238061	0.0818787	0.0922463	0.0246467	0.491652	0.434429	71761524	Hydrogel	1.67486	0.000115453	1.67486	1.67486	1.67486
14071470	-1.21709	0.186437	0.340944	0.065125	-0.265291	0.0120911	0.155273	0.029788	0.466793	1.21658	14071470	Hydrogel	2.90886	0.000262685	2.90886	2.90886	2.90886
71229475	-1.21617	0.207076	0.418533	0.501811	-0.488647	0.138083	0.560572	0.445324	0.777411	1.21658	71229475	Hydrogel	4.02175	0.000395467	4.02175	4.02175	4.02175
25182694	-1.21501	0.163049	0.377633	0.21584	-0.79918	0.154989	0.489716	0.685505	0.762784	-0.325019	25182694	Hydrogel	2.31964	0.000192383	2.31964	2.31964	2.31964
123262984	-1.21342	0.323486	0.40889	0.0959847	-0.162357	0.0130124	0.0469197	0.0180148	0.425939	-0.918799	123262984	Anti-EBV	4.33792	0.000433189	4.33792	4.33792	4.33792
451911	-1.21239	0.284736	0.386335	0.0584126	-0.546312	0.281381	0.721284	0.339881	0.839687	-0.918799	451911	Anti-EBV	2.50125	0.000214052	2.50125	2.50125	2.50125
65269	-1.21239	0.284736	0.386335	0.0584126	-0.546312	0.281381	0.721284	0.339881	0.839687	0.0230655	65269	Hydrogel	1.91597	0.00014422	1.91597	1.91597	1.91597
54171947	-1.21235	0.419545	0.347642	0.20437	0.185494	0.120707	0.146586	0.0367695	0.51073	-0.326613	54171947	Anti-EBV	1.52474	9.75411e-05	1.52474	1.52474	1.52474
351993	-1.21235	0.419545	0.347642	0.20437	0.185494	0.120707	0.146586	0.0367695	0.51073	-0.326613	351993	Anti-EBV	1.52474	9.75411e-05	1.52474	1.52474	1.52474
131878455	-1.20995	0.593793	0.432569	0.0828146	0.0956217	0.108866	0.326594	0.144235	0.700477	0.905574	131878455	Hydrogel	1.58444	0.000104664	1.58444	1.58444	1.58444
136041721	-1.20727	0.907606	0.374109	0.213467	0.350073	0.195428	0.195961	0.393593	0.47239	-0.64218	136041721	Anti-EBV	3.19026	0.000296259	3.19026	3.19026	3.19026
21157388	-1.20718	0.749178	0.374783	0.224919	0.425134	0.0981128	0.22756	0.519734	0.624471	0.889834	21157388	Hydrogel	1.10971	4.80223e-05	1.10971	1.10971	1.10971
89495556	-1.20555	0.317795	0.381766	0.0959847	-0.262312	0.0118501	0.0463412	0.0170888	0.421284	0.197312	89495556	Hydrogel	1.3962	8.22053e-05	1.3962	1.3962	1.3962
7059437	-1.20555	0.317795	0.381766	0.0959847	-0.262312	0.0118501	0.0463412	0.0170888	0.421284	-2.41319	7059437	Anti-EBV	1.81168	0.000131777	1.81168	1.81168	1.81168
121487515	-1.20555	0.3198	0.381644	0.0959847	-0.270558	0.0118501	0.0463412	0.0176248	0.421761	-2.27308	121487515	Anti-EBV	1.94572	0.00014777	1.94572	1.94572	1.94572
18323	-1.20555	0.317795	0.381766	0.0959847	-0.262312	0.0118501	0.0463412	0.0170888	0.421284	-2.27308	18323	Anti-EBV	1.95665	0.000149073	1.95665	1.95665	1.95665
10377200	-1.20555	0.319755	0.38171	0.0959847	-0.263558	0.0118501	0.0485695	0.0163679	0.421761	-0.683417	10377200	Anti-EBV	1.84425	0.000135663	1.84425	1.84425	1.84425
11064619	-1.20555	0.317795	0.381766	0.0959847	-0.262312	0.0118501	0.0463412	0.0170888	0.421284	-0.326181	11064619	Anti-EBV	0.809808	1.22407e-05	0.809808	0.809808	0.809808
7059439	-1.20555	0.317795	0.381766		-0.262312	0.0118501	0.0463412	0.0170888	0.421284	0.965578	7059439	Hydrogel	2.54806	0.000219636	2.54806	2.54806	2.54806
101384428	-1.20555	0.320713	0.38164	0.101026	-0.193812	0.0118501	0.0466695	0.0164239	0.421761	1.31971	101384428	Hydrogel	2.82268	0.000252402	2.82268	2.82268	2.82268
46780471	-1.20555	0.317795	0.381766	0.0959847	-0.262312	0.0118501	0.0463412	0.0170888	0.421284	-3.37378	46780471	Anti-EBV	1.32232	7.33903e-05	1.32232	1.32232	1.32232
45356795	-1.20555	0.317795	0.381766	0.0959847	-0.262312	0.0118501	0.0463412	0.0170888	0.421284	-0.954021	45356795	Anti-EBV	4.59591	0.000463971	4.59591	4.59591	4.59591
643973	-1.20555	0.317795	0.381766	0.0959847	-0.262312	0.0118501	0.0463412	0.0170888	0.421284	0.905574	643973	Hydrogel	2.45809	0.000208902	2.45809	2.45809	2.45809
121487529	-1.20555	0.319408	0.382089	0.0931607	-0.290033	0.0118501	0.0489788	0.0163146	0.421761	0.107629	121487529	Hydrogel	1.32136	7.32753e-05	1.32136	1.32136	1.32136
451603	-1.20537	0.267163	0.351468	0.261378	-0.340935	0.185766	0.108	0.0379478	0.423641	-1.01271	451603	Anti-EBV	5.63807	0.000588315	5.63807	5.63807	5.63807
94842080	-1.20537	0.588007	0.363773	0.259587	-0.593845	0.0697291	0.100176	0.0265083	0.513191	-1.01271	94842080	Anti-EBV	3.78165	0.00036682	3.78165	3.78165	3.78165
57197621	-1.20537	0.588007	0.363773	0.259587	-0.593845	0.0697291	0.100176	0.0265083	0.513191	-0.823799	57197621	Anti-EBV	1.55933	0.000101668	1.55933	1.55933	1.55933
54669719	-1.20537	0.588007	0.363773	0.259587	-0.593845	0.0697291	0.100176	0.0265083	0.513191	-0.823799	54669719	Anti-EBV	1.55933	0.000101668	1.55933	1.55933	1.55933
21117608	-1.20537	0.588007	0.363773	0.259587	-0.593845	0.0697291	0.100176	0.0265083	0.513191	0.347286	21117608	Hydrogel	2.88352	0.00025966	2.88352	2.88352	2.88352
27556877	-1.20537	0.588007	0.363773	0.259587	-0.593845	0.0697291	0.100176	0.0265083	0.513191	0.102723	27556877	Hydrogel	2.31795	0.000192181	2.31795	2.31795	2.31795
688478	-1.20537	0.588007	0.363773	0.259587	-0.593845	0.0697291	0.100176	0.0265083	0.513191	-0.259358	688478	Hydrogel	1.48061	9.22764e-05	1.48061	1.48061	1.48061
352976	-1.20537	0.588007	0.363773	0.259587	-0.593845	0.0697291		0.0265083	0.513191	0.905574	352976	Hydrogel	4.17459	0.000413702	4.17459	4.17459	4.17459
151382	-1.20537	0.588007	0.363773	0.259587	-0.593845	0.0697291	0.100176	0.0265083	0.513191	0.905574	151382	Hydrogel	4.17459	0.000413702	4.17459	4.17459	4.17459
101507	-1.20537	0.588007	0.363773	0.259587	-0.593845	0.0697291	0.100176	0.0265083	0.513191	0.905574	101507	Hydrogel	4.17459	0.000413702	4.17459	4.17459	4.17459
121487114	-1.20322	0.330312	0.38125	0.0959847	-0.228775	0.0118501	0.049829	0.0160422	0.42437	0.905574	121487114	Hydrogel	2.35335	0.000196405	2.35335	2.35335	2.35335
69906586	-1.20272	0.403811	0.352958	0.0688703	0.139926	0.0356657	0.0514888	0.0430881	0.419303	0.905574	69906586	Hydrogel	1.51355	9.62062e-05	1.51355	1.51355	1.51355
91490554	-1.20272	0.632908	0.365494	0.0694388	0.212391	0.0269461	0.0506516	0.0329804	0.432328	0.905574	91490554	Hydrogel	1.39984	8.26387e-05	1.39984	1.39984	1.39984
131849184	-1.20269	0.406074	0.375527	0.261405	-0.328082	0.0665742	0.577789	0.7693	0.594881	0.905574	131849184	Hydrogel	2.70185	0.000237986	2.70185	2.70185	2.70185
21151277	-1.20089	0.249174	0.423466	0.046577	1.45458	0.141183	0.330137	0.896967	0.659942	0.905574	21151277	Anti-EBV	1.07569	4.39633e-05	1.07569	1.07569	1.07569
6708804	-1.19903	0.372196	0.385899	0.103494	0.0170754	0.0197209	0.093292	0.0719891	0.405915	0.905574	6708804	Hydrogel	1.74032	0.000123263	1.74032	1.74032	1.74032
1817	-1.19903	0.372196	0.385899		0.0170754	0.0197209	0.093292	0.0719891	0.405915	0.905574	1817	Hydrogel	1.74032	0.000123263	1.74032	1.74032	1.74032
481528	-1.19565	0.948783	0.407971	0.0801619	-0.453615	0.0160481	0.205768	0.832512	0.765717	0.905574	481528	Hydrogel	3.29745	0.000309048	3.29745	3.29745	3.29745
92245604	-1.19505	0.0799755	0.378373	0.0428731	-0.00519403	0.0400743	0.484171	0.57313	0.810169	0.905574	92245604	Hydrogel	1.78959	0.000129141	1.78959	1.78959	1.78959
13093729	-1.19505	0.0799755	0.378373	0.0428731	-0.00519403	0.0400743	0.484171	0.57313	0.810169	-0.744841	13093729	Anti-EBV	3.03044	0.00027719	3.03044	3.03044	3.03044
92245606	-1.19505	0.0799755	0.378373	0.0428731	-0.00519403	0.0400743	0.484171	0.57313	0.810169	-0.788309	92245606	Anti-EBV	3.42986	0.000324846	3.42986	3.42986	3.42986
136415743	-1.19472	0.39764	0.44118	0.203803	1.21842	0.306403	0.468079	0.828653	0.873272	-0.788309	136415743	Anti-EBV	7.68974	0.000833105	7.68974	7.68974	7.68974
21732849	-1.19425	0.336843	0.397377	0.0355225	0.817984	0.0714337	0.474184	0.547587	0.82711	-0.788309	21732849	Anti-EBV	6.30294	0.000667642	6.30294	6.30294	6.30294
92236455	-1.19303	0.48545	0.333272	0.0235708	0.0831206	0.231917	0.344001	0.245239	0.717256	-0.788309	92236455	Anti-EBV	3.75203	0.000363286	3.75203	3.75203	3.75203
6474236	-1.19299	0.669561	0.399881	0.155557	-0.351213	0.455981	0.353725	0.436427	0.605059	-0.788309	6474236	Anti-EBV	2.2345	0.000182225	2.2345	2.2345	2.2345
133125648	-1.19299	0.669561	0.399881	0.155557	-0.351213	0.455981	0.353725	0.436427	0.605059	-0.788309	133125648	Anti-EBV	2.2345	0.000182225	2.2345	2.2345	2.2345
11130341	-1.19229	0.515026	0.378161	0.0476066	-0.810029	0.0668457	0.541856	0.458486	0.789247	-0.788309	11130341	Hydrogel	0.787433	9.57105e-06	0.787433	0.787433	0.787433
21828013	-1.19054	0.404556	0.307532	0.16266	-0.711806	0.0329883	0.122454	0.0671312	0.798185	-0.788309	21828013	Anti-EBV	0.976049	3.20754e-05	0.976049	0.976049	0.976049
92249433	-1.18464	0.393452	0.432163	0.102861	-0.516821	0.307807	0.617838	0.748569	0.86504	-0.788309	92249433	Anti-EBV	1.67579	0.000115564	1.67579	1.67579	1.67579
10107793	-1.18464	0.393452	0.432163	0.102861	-0.516821	0.307807	0.617838	0.748569	0.86504	0.905574	10107793	Hydrogel	3.71919	0.000359367	3.71919	3.71919	3.71919
258592	-1.18338	0.339337	0.344446	0.122937	-0.649828	0.0529832	0.337373	0.743761	0.585489	1.2059	258592	Hydrogel	5.6257	0.000586839	5.6257	5.6257	5.6257
3007919	-1.18095	0.186439	0.370014	0.0642318	-0.31312	0.0379791	0.238129	0.800914	0.686646	1.27043	3007919	Hydrogel	3.28761	0.000307874	3.28761	3.28761	3.28761
137699672	-1.18004	0.350851	0.379642	0.0576866	-0.228275	0.389324	0.158624	0.388372	0.515504	-0.229113	137699672	Anti-EBV	0.708343	1.34632e-07	0.708343	0.708343	0.708343
493223	-1.17825	0.285848	0.451253	0.266782	2.51774	0.187719	0.585363	0.948806	0.821298	-0.246645	493223	Anti-EBV	4.90348	0.000500668	4.90348	4.90348	4.90348
5278278	-1.17535	0.840469	0.407314	0.537464	0.406534	0.157634	0.545207	0.68946	0.689333	0.946827	5278278	Hydrogel	1.19012	5.76171e-05	1.19012	1.19012	1.19012
10015847	-1.17214	0.541316	0.378321	0.272344	-0.467669	0.134974	0.516733	0.517131	0.792516	0.946827	10015847	Hydrogel	3.54662	0.000338778	3.54662	3.54662	3.54662
513276	-1.17085	0.1409	0.397242	0.231438	1.98884	0.0762711	0.419603	0.520429	0.44567	0.548125	513276	Anti-EBV	1.89238	0.000141405	1.89238	1.89238	1.89238
155290824	-1.16607	0.674686	0.392185	0.2236	-0.813371	0.220487	0.638239	0.746035	0.823592	-0.995774	155290824	Anti-EBV	2.22166	0.000180693	2.22166	2.22166	2.22166
21121842	-1.16171	0.422519	0.403885	0.134512	-0.0657543	0.0296069	0.117492	0.0730763	0.497621	-0.357879	21121842	Anti-EBV	1.22103	6.13052e-05	1.22103	1.22103	1.22103
67763123	-1.16038	0.358262	0.423369	0.0928675	-0.393358	0.0231033	0.102025	0.0336817	0.428092	-0.357879	67763123	Hydrogel	0.772507	7.79019e-06	0.772507	0.772507	0.772507
69886241	-1.16038	0.358262	0.423369	0.0928675	-0.393358	0.0231033	0.102025	0.0336817	0.428092	-0.357879	69886241	Hydrogel	0.772507	7.79019e-06	0.772507	0.772507	0.772507
13564810	-1.16038	0.358262	0.423369	0.0928675	-0.393358	0.0231033	0.102025	0.0336817	0.428092	1.12026	13564810	Hydrogel	3.49779	0.000332952	3.49779	3.49779	3.49779
54336181	-1.15915	0.868885	0.368132	0.264139	0.94764	0.363734	0.17485	0.280607	0.44591	-0.0293149	54336181	Anti-EBV	1.92994	0.000145887	1.92994	1.92994	1.92994
21634250	-1.15839	0.387616	0.402328	0.192026	-0.111491	0.0989455	0.610642	0.732672	0.826155	-0.132689	21634250	Anti-EBV	0.736324	3.47311e-06	0.736324	0.736324	0.736324
86592810	-1.158	0.832745	0.454915	0.265294	2.59948	0.394174	0.604662	0.781022	0.700405	1.39014	86592810	Anti-EBV	1.37827	8.00659e-05	1.37827	1.37827	1.37827
154701266	-1.1559	0.535114	0.416822	0.542768	1.61761	0.43136	0.560235	0.839074	0.677618	1.39014	154701266	Anti-EBV	0.83345	1.50615e-05	0.83345	0.83345	0.83345
5273512	-1.15415	0.621302	0.448945	0.076672	1.06796	0.139328	0.475566	0.81263	0.821414	-0.913959	5273512	Anti-EBV	12.3758	0.00139221	12.3758	12.3758	12.3758
21829242	-1.15291	0.457443	0.426834	0.170322	1.06508	0.301368	0.581828	0.821608	0.833825	-0.0963961	21829242	Anti-EBV	2.2618	0.000185482	2.2618	2.2618	2.2618
510948	-1.15097	0.130885	0.340197	0.0308472	0.99829	0.0258032	0.328299	0.820469	0.787525	0.0524227	510948	Anti-EBV	1.81866	0.00013261	1.81866	1.81866	1.81866
121486885	-1.15002	0.192353	0.424846	0.287695	1.74046	0.512673	0.575657	0.858398	0.699384	0.0524227	121486885	Anti-EBV	2.6924	0.000236858	2.6924	2.6924	2.6924
21140569	-1.14611	0.115821	0.376347	0.0997743	-1.05907	0.215124	0.567509	0.195078	0.483292	-0.23906	21140569	Hydrogel	14.027	0.00158922	14.027	14.027	14.027
9824370	-1.14349	0.354893	0.398378	0.048159	1.33748	0.0779519	0.322469	0.794778	0.620492	-0.438211	9824370	Anti-EBV	4.26764	0.000424804	4.26764	4.26764	4.26764
53835662	-1.14325	0.550822	0.382962	0.128797	0.374131	0.0814574	0.100275	0.0477392	0.612439	0.205772	53835662	Anti-EBV	0.883593	2.10441e-05	0.883593	0.883593	0.883593
204132	-1.14304	0.431731	0.371183	0.185402	-0.0627018	0.0903948	0.383125	0.925828	0.716434	-0.916786	204132	Anti-EBV	6.04521	0.000636892	6.04521	6.04521	6.04521
57377074	-1.14233	0.25726	0.415946	0.0780715	0.216067	0.0407391	0.379644	0.291732	0.844304	0.431523	57377074	Hydrogel	0.931406	2.67489e-05	0.931406	0.931406	0.931406
4555041	-1.14204	0.482034	0.375117		0.407519	0.0210237	0.0691688	0.123161	0.473052	0.365809	4555041	Anti-EBV	0.74622	4.65387e-06	0.74622	0.74622	0.74622
3010352	-1.14138	0.449487	0.462823	0.135928	0.49889	0.836831	0.432436	0.94463	0.546616	-0.48287	3010352	Anti-EBV	2.81546	0.00025154	2.81546	2.81546	2.81546
511666	-1.13749	0.429705	0.392449	0.119868	-0.219208	0.0119386	0.283421	0.362125	0.682843	-1.13443	511666	Anti-EBV	421.51	0.0502072	421.51	421.51	421.51
6479393	-1.13577	0.199387	0.375996	0.040677	-0.526591	0.390828	0.687528	0.67904	0.653843	0.369397	6479393	Hydrogel	2.78707	0.000248154	2.78707	2.78707	2.78707
6475823	-1.13432	0.449644	0.391484	0.326861	2.02356	0.794372	0.562381	0.878476	0.832556	-0.845148	6475823	Anti-EBV	14.7359	0.0016738	14.7359	14.7359	14.7359
131881305	-1.13308	0.515926	0.437599	0.0507109	-0.195258	0.0683352	0.594622	0.778656	0.876196	0.104734	131881305	Hydrogel	1.15947	5.39597e-05	1.15947	1.15947	1.15947
10859187	-1.1323	0.516835	0.406075	0.0605008	0.411759	0.0207098	0.0762123	0.0313776	0.577003	0.104734	10859187	Anti-EBV	1.0581	4.18646e-05	1.0581	1.0581	1.0581
13188940	-1.13206	0.771122	0.339733	0.0641829	0.0795736	0.0950847	0.12813	0.069715	0.402689	0.104734	13188940	Hydrogel	0.736465	3.48995e-06	0.736465	0.736465	0.736465
5272663	-1.1282	0.859315	0.401006	0.229233	-1.15288	0.109381	0.508329	0.570334	0.551536	-0.601571	5272663	Hydrogel	30.8652	0.00359823	30.8652	30.8652	30.8652
139026027	-1.12708	0.416916	0.434641	0.102474	0.429166	0.035062	0.153546	0.0255312	0.516786	0.383664	139026027	Anti-EBV	0.749694	5.06834e-06	0.749694	0.749694	0.749694
57369201	-1.12708	0.416916	0.434641	0.102474	0.429166	0.035062	0.153546	0.0255312	0.516786	-0.934974	57369201	Anti-EBV	10.7486	0.00119807	10.7486	10.7486	10.7486
3010797	-1.12629	0.393064	0.467866	0.173376	0.400345	0.970879	0.651686	0.954415	0.751608	-1.16724	3010797	Anti-EBV	53.405	0.00628752	53.405	53.405	53.405
131708540	-1.12627	0.33278	0.464128	0.0959847	-0.00717284	0.0130733	0.044702	0.0197807	0.432292	-0.910041	131708540	Anti-EBV	6.61172	0.000704483	6.61172	6.61172	6.61172
70021591	-1.12441	0.550621	0.467604	0.315341	5.57276	0.530616	0.471773	0.893695	0.722637	0.835374	70021591	Anti-EBV	4.12565	0.000407863	4.12565	4.12565	4.12565
76973833	-1.12257	0.35354	0.374707	0.107315	1.07803	0.278695	0.183279	0.0442283	0.562666	-0.955509	76973833	Anti-EBV	17.9197	0.00205367	17.9197	17.9197	17.9197
511886	-1.12159	0.642757	0.376136	0.0613593	-0.465043	0.132728	0.559903	0.546602	0.82281	0.838256	511886	Hydrogel	3.51437	0.000334929	3.51437	3.51437	3.51437
14430355	-1.12018	0.507185	0.44914	0.025885	1.15685	0.0623409	0.562338	0.481976	0.686555	-1.42706	14430355	Anti-EBV	11.1998	0.0012519	11.1998	11.1998	11.1998
331904	-1.12018	0.507185	0.44914	0.025885	1.15685	0.0623409	0.562338	0.481976	0.686555	-1.93132	331904	Anti-EBV	4.67698	0.000473644	4.67698	4.67698	4.67698
3011905	-1.11682	0.0870475	0.403317	0.346219	-0.0251753	0.243676	0.480092	0.453473	0.584854	0.785375	3011905	Hydrogel	1.75714	0.00012527	1.75714	1.75714	1.75714
96547	-1.1159	0.803904	0.401222	0.211786	1.19596	0.368597	0.559574	0.662207	0.725282	-0.462283	96547	Anti-EBV	4.29491	0.000428058	4.29491	4.29491	4.29491
6595777	-1.1159	0.803904	0.401222	0.211786	1.19596	0.368597	0.559574	0.662207	0.725282	0.12859	6595777	Anti-EBV	1.92002	0.000144703	1.92002	1.92002	1.92002
71407349	-1.11584	0.324883	0.362287	0.132073	-0.408326	0.0170808	0.175969	0.0276582	0.487778	1.87037	71407349	Hydrogel	5.26179	0.000543419	5.26179	5.26179	5.26179
15104857	-1.11552	0.227537	0.337647	0.221215	0.428876	0.0639256	0.426241	0.580508	0.728834	-0.397294	15104857	Anti-EBV	2.33383	0.000194076	2.33383	2.33383	2.33383
490310	-1.11476	0.185111	0.362774	0.0954697	0.218656	0.0367961	0.318483	0.408032	0.796453	-0.413106	490310	Anti-EBV	1.98041	0.000151909	1.98041	1.98041	1.98041
16076141	-1.1119	0.175938	0.40872	0.0860306	-0.0109697	0.0876434	0.576149	0.901486	0.788156	-1.62288	16076141	Anti-EBV	3.75404	0.000363525	3.75404	3.75404	3.75404
282734	-1.11162	0.275036	0.429012	0.0497103	0.554773	0.159339	0.601912	0.893469	0.869664	-0.218956	282734	Anti-EBV	1.93286	0.000146236	1.93286	1.93286	1.93286
22793986	-1.11039	0.449069	0.364307	0.125704	1.05086	0.373319	0.135506	0.323235	0.678829	0.271681	22793986	Anti-EBV	1.50439	9.51131e-05	1.50439	1.50439	1.50439
139592726	-1.10818	0.706301	0.445839	0.201804	1.42232	0.118358	0.377156	0.252278	0.857435	2.08229	139592726	Hydrogel	1.07593	4.39925e-05	1.07593	1.07593	1.07593
137699081	-1.10818	0.706301	0.445839	0.201804	1.42232	0.118358	0.377156	0.252278	0.857435	0.250219	137699081	Anti-EBV	1.92735	0.000145578	1.92735	1.92735	1.92735
77844690	-1.10589	0.235069	0.355989	0.0770668	-0.500014	0.1279	0.491295	0.340366	0.510107	-0.456021	77844690	Hydrogel	0.809774	1.22366e-05	0.809774	0.809774	0.809774
124223956	-1.10589	0.235069	0.355989	0.0770668	-0.500014	0.1279	0.491295	0.340366	0.510107	1.44587	124223956	Hydrogel	5.24902	0.000541895	5.24902	5.24902	5.24902
21140809	-1.10571	0.507727	0.393609	0.0822405	0.129781	0.054776	0.297922	0.273886	0.638948	1.44587	21140809	Hydrogel	2.21355	0.000179725	2.21355	2.21355	2.21355
15450939	-1.10463	0.471146	0.39584	0.263839	-0.62217	0.55954	0.439587	0.956438	0.716381	-1.53876	15450939	Anti-EBV	2.27867	0.000187495	2.27867	2.27867	2.27867
71539358	-1.10327	0.620195	0.351149	0.0937901	2.16668	0.174378	0.269465	0.0781489	0.496801	0.905574	71539358	Anti-EBV	1.59491	0.000105913	1.59491	1.59491	1.59491
45356917	-1.10183	0.404412	0.371297	0.102474	0.149532	0.0318925	0.145298	0.0223634	0.51127	-1.00162	45356917	Anti-EBV	16.9503	0.00193801	16.9503	16.9503	16.9503
13066372	-1.10183	0.404412	0.371297	0.102474	0.149532	0.0318925	0.145298	0.0223634	0.51127	-1.02121	13066372	Anti-EBV	21.2407	0.0024499	21.2407	21.2407	21.2407
9427	-1.10183	0.404412	0.371297	0.102474	0.149532	0.0318925	0.145298	0.0223634	0.51127	0.0272827	9427	Anti-EBV	0.860213	1.82547e-05	0.860213	0.860213	0.860213
1520351	-1.10183	0.404412	0.371297	0.102474	0.149532	0.0318925	0.145298	0.0223634	0.51127	-0.358264	1520351	Anti-EBV	1.67287	0.000115215	1.67287	1.67287	1.67287
54669724	-1.10183	0.404412	0.371297	0.102474	0.149532	0.0318925	0.145298	0.0223634	0.51127	-0.358264	54669724	Anti-EBV	1.67287	0.000115215	1.67287	1.67287	1.67287
13066370	-1.10183	0.404412	0.371297	0.102474	0.149532	0.0318925	0.145298	0.0223634	0.51127	-2.61815	13066370	Anti-EBV	1.87419	0.000139235	1.87419	1.87419	1.87419
7059460	-1.10183	0.404412	0.371297	0.102474	0.149532	0.0318925	0.145298	0.0223634	0.51127	-0.919397	7059460	Anti-EBV	8.99271	0.000988565	8.99271	8.99271	8.99271
450215	-1.10183	0.404412	0.382494	0.102474	0.237579	0.0328931	0.14339	0.0231648	0.51127	-0.919397	450215	Anti-EBV	9.67519	0.00106999	9.67519	9.67519	9.67519
101317	-1.10183	0.404412	0.371297	0.102474	0.149532	0.0318925	0.145298	0.0223634	0.51127	0.74136	101317	Hydrogel	1.37594	7.97874e-05	1.37594	1.37594	1.37594
44629859	-1.10183	0.404412	0.371297	0.102474	0.149532	0.0318925	0.145298	0.0223634	0.51127	-0.628741	44629859	Anti-EBV	3.03352	0.000277558	3.03352	3.03352	3.03352
91872277	-1.10183	0.409214	0.371959	0.0986676	0.114203	0.0318925	0.152075	0.0240352	0.512346	-0.176187	91872277	Anti-EBV	1.15075	5.29196e-05	1.15075	1.15075	1.15075
44630766	-1.10183	0.404412	0.371297	0.102474	0.149532	0.0318925	0.145298	0.0223634	0.51127	0.302343	44630766	Hydrogel	0.879794	2.05909e-05	0.879794	0.879794	0.879794
121486935	-1.10169	0.198655	0.352764	0.252709	-0.0530266	0.218481	0.0976694	0.0440062	0.379414	-0.274834	121486935	Anti-EBV	1.08645	4.52482e-05	1.08645	1.08645	1.08645
14408979	-1.10148	0.33775	0.409909	0.0747228	1.07614	0.126224	0.475131	0.457249	0.858582	0.155092	14408979	Anti-EBV	1.74369	0.000123664	1.74369	1.74369	1.74369
46780472	-1.10113	0.330411	0.449346	0.0959847	-0.0272909	0.0130733	0.044387	0.0193799	0.425028	0.0205735	46780472	Hydrogel	0.770133	7.50691e-06	0.770133	0.770133	0.770133
90472260	-1.10113	0.330411	0.449346	0.0959847	-0.0272909	0.0130733	0.044387	0.0193799	0.425028	0.0205735	90472260	Hydrogel	0.770133	7.50691e-06	0.770133	0.770133	0.770133
49849540	-1.10113	0.330411	0.449346	0.0959847	-0.0272909	0.0130733	0.044387	0.0193799	0.425028	-0.00714123	49849540	Hydrogel	0.733634	3.1521e-06	0.733634	0.733634	0.733634
15037959	-1.10014	0.391175	0.342272	0.0917395	0.723007	0.0537444	0.130438	0.0218144	0.466738	-0.00714123	15037959	Anti-EBV	1.65181	0.000112702	1.65181	1.65181	1.65181
515217	-1.10003	0.336522	0.416006	0.159775	0.558396	0.0224538	0.243768	0.378852	0.829583	0.364907	515217	Anti-EBV	0.893888	2.22725e-05	0.893888	0.893888	0.893888
118855918	-1.09925	0.323552	0.416629	0.0959847	-0.142984	0.0130124	0.0447635	0.0177796	0.42262	-0.912222	118855918	Anti-EBV	6.52326	0.000693929	6.52326	6.52326	6.52326
124202892	-1.09925	0.326769	0.435734	0.0959847	-0.155231	0.0138892	0.0447635	0.0179649	0.422851	-0.757069	124202892	Anti-EBV	3.19435	0.000296747	3.19435	3.19435	3.19435
156587569	-1.09886	0.0450405	0.30823	0.0102969	-0.107766	0.143447	0.493766	0.550561	0.730071	1.44587	156587569	Hydrogel	2.92399	0.000264489	2.92399	2.92399	2.92399
6327750	-1.09837	0.809231	0.437963	0.197966	0.103557	0.136435	0.0325978	0.235349	0.39626	1.44587	6327750	Hydrogel	2.28648	0.000188426	2.28648	2.28648	2.28648
90674669	-1.09804	0.778911	0.425467	0.363673	3.00155	0.354355	0.244175	0.475121	0.546223	1.44587	90674669	Anti-EBV	1.57193	0.000103171	1.57193	1.57193	1.57193
640874	-1.09594	0.189571	0.420752	0.173191	-0.731972	0.11436	0.43951	0.690051	0.620909	1.44587	640874	Hydrogel	9.16895	0.00100959	9.16895	9.16895	9.16895
13831580	-1.09583	0.818258	0.384192	0.0666356	-0.96383	0.0571747	0.399955	0.531905	0.749256	1.44587	13831580	Hydrogel	26.5205	0.00307985	26.5205	26.5205	26.5205
3010825	-1.0943	0.295054	0.40249	0.304319	2.04126	0.74295	0.532515	0.866556	0.821069	1.44587	3010825	Anti-EBV	1.03858	3.9536e-05	1.03858	1.03858	1.03858
44572473	-1.0925	0.0500981	0.316276	0.015184	1.84534	0.26312	0.697947	0.286319	0.544038	1.44587	44572473	Anti-EBV	0.929658	2.65404e-05	0.929658	0.929658	0.929658
451874	-1.0921	0.323717	0.349322	0.147668	0.395012	0.0924669	0.354387	0.591132	0.691619	1.44587	451874	Hydrogel	1.70644	0.00011922	1.70644	1.70644	1.70644
14185422	-1.0921	0.323717	0.349322	0.147668	0.395012	0.0924669	0.354387	0.591132	0.691619	1.44587	14185422	Hydrogel	1.70644	0.00011922	1.70644	1.70644	1.70644
54263300	-1.08979	0.581447	0.369158	0.245152	-0.261023	0.0289339	0.290108	0.362673	0.604373	1.44587	54263300	Hydrogel	3.6197	0.000347497	3.6197	3.6197	3.6197
10355712	-1.08979	0.581447	0.369158	0.245152	-0.261023	0.0289339	0.290108	0.362673	0.604373	1.44587	10355712	Hydrogel	3.6197	0.000347497	3.6197	3.6197	3.6197
129395379	-1.08936	0.47114	0.430739	0.0887836	1.66548	0.429881	0.670383	0.67533	0.829538	1.44587	129395379	Anti-EBV	0.829605	1.46027e-05	0.829605	0.829605	0.829605
12803301	-1.08936	0.47114	0.430739	0.0887836	1.66548	0.429881	0.670383	0.67533	0.829538	-0.726667	12803301	Anti-EBV	10.0342	0.00111283	10.0342	10.0342	10.0342
12803302	-1.08936	0.47114	0.430739	0.0887836	1.66548	0.429881	0.670383	0.67533	0.829538	0.704608	12803302	Anti-EBV	1.46457	9.03618e-05	1.46457	1.46457	1.46457
11121872	-1.0883	0.419895	0.366793	0.169929	0.357842	0.129845	0.246214	0.655685	0.361085	0.905574	11121872	Hydrogel	1.24273	6.38943e-05	1.24273	1.24273	1.24273
176826	-1.08775	0.352813	0.35597	0.164756	0.352472	0.0552023	0.384798	0.815887	0.737077	0.905574	176826	Hydrogel	1.25021	6.47863e-05	1.25021	1.25021	1.25021
456570	-1.08744	0.274813	0.382763	0.090706	1.09663	0.0640284	0.0358782	0.0137813	0.50391	0.905574	456570	Anti-EBV	0.84267	1.61615e-05	0.84267	0.84267	0.84267
156594560	-1.08622	0.800992	0.362766	0.0966268	-0.169091	0.121439	0.118619	0.120813	0.456745	0.586389	156594560	Hydrogel	1.87203	0.000138977	1.87203	1.87203	1.87203
131848792	-1.08538	0.710261	0.402856	0.0619165	1.0458	0.441341	0.196972	0.199603	0.578182	0.0895987	131848792	Anti-EBV	1.85798	0.000137301	1.85798	1.85798	1.85798
94358774	-1.08465	0.195872	0.453376	0.0785645	-1.89744	0.174818	0.67309	0.291428	0.453904	0.905574	94358774	Hydrogel	4.16991	0.000413144	4.16991	4.16991	4.16991
121010792	-1.08431	0.178503	0.298536	0.0105531	-1.3277	0.36248	0.413605	0.857939	0.285183	0.905574	121010792	Hydrogel	12.2682	0.00137937	12.2682	12.2682	12.2682
133589974	-1.08052	0.1541	0.343933		0.847074	0.338541	0.131761	0.0630102	0.55048	-0.892892	133589974	Anti-EBV	13.8206	0.0015646	13.8206	13.8206	13.8206
118855855	-1.08048	0.321736	0.418861	0.0959847	-0.20466	0.0138892	0.0450811	0.0177539	0.419175	1.43035	118855855	Hydrogel	3.34714	0.000314977	3.34714	3.34714	3.34714
11022827	-1.07961	0.51844	0.398126	0.13292	0.338022	0.183291	0.517847	0.429973	0.663354	-0.319391	11022827	Anti-EBV	1.93003	0.000145898	1.93003	1.93003	1.93003
101343952	-1.07918	0.322644	0.422244	0.105801	-0.116055	0.0138892	0.0460285	0.0175557	0.422018	-1.01899	101343952	Anti-EBV	21.9144	0.00253029	21.9144	21.9144	21.9144
510947	-1.07747	0.156038	0.334473	0.0354931	0.570581	0.0460036	0.30257	0.954557	0.783224	-0.3472	510947	Anti-EBV	2.4844	0.000212041	2.4844	2.4844	2.4844
5271296	-1.07703	0.312192	0.416214	0.303641	2.71577	0.356699	0.474846	0.912626	0.786421	-0.530049	5271296	Anti-EBV	9.09889	0.00100123	9.09889	9.09889	9.09889
92286289	-1.07664	0.737618	0.402257	0.309637	-0.150734	0.328961	0.186968	0.476411	0.711845	-2.35796	92286289	Anti-EBV	1.72902	0.000121915	1.72902	1.72902	1.72902
512678	-1.07462	0.833733	0.468523	0.0217257	0.418752	0.0511795	0.118113	0.0887832	0.356243	-0.464516	512678	Anti-EBV	2.75444	0.00024426	2.75444	2.75444	2.75444
13831293	-1.07378	0.747008	0.395278	0.127104	-0.385768	0.315302	0.678932	0.3451	0.551368	-0.464516	13831293	Anti-EBV	0.889872	2.17933e-05	0.889872	0.889872	0.889872
59783293	-1.0735	0.662698	0.370889	0.307423	-0.30316	0.0469293	0.403892	0.313499	0.811566	-0.060034	59783293	Hydrogel	1.15342	5.32385e-05	1.15342	1.15342	1.15342
40527693	-1.0735	0.312132	0.357775	0.092562	-0.492759	0.0413979	0.626859	0.230938	0.748854	-0.060034	40527693	Hydrogel	1.76083	0.00012571	1.76083	1.76083	1.76083
11821635	-1.0735	0.312132	0.357775	0.092562	-0.492759	0.0413979	0.626859	0.230938	0.748854	-0.835813	11821635	Anti-EBV	2.74807	0.0002435	2.74807	2.74807	2.74807
96889965	-1.0735	0.662698	0.370889	0.307423	-0.30316	0.0469293	0.403892	0.313499	0.811566	-0.835813	96889965	Anti-EBV	3.87609	0.000378087	3.87609	3.87609	3.87609
177273	-1.0735	0.662698	0.379556	0.307423	-0.296348	0.0498201	0.389908	0.314875	0.811566	-0.835813	177273	Anti-EBV	3.91662	0.000382923	3.91662	3.91662	3.91662
466420	-1.0735	0.662698	0.370889	0.307423	-0.30316	0.0469293	0.403892	0.313499	0.811566	-0.964912	466420	Anti-EBV	9.32422	0.00102812	9.32422	9.32422	9.32422
2305663	-1.0735	0.312132	0.357775	0.092562	-0.492759	0.0413979	0.626859	0.230938	0.748854	-0.79229	2305663	Anti-EBV	2.21334	0.000179699	2.21334	2.21334	2.21334
905903	-1.0735	0.312132	0.357775	0.092562	-0.492759	0.0413979	0.626859	0.230938	0.748854	0.890366	905903	Hydrogel	4.07517	0.00040184	4.07517	4.07517	4.07517
11065470	-1.0735	0.662698	0.370889	0.307423	-0.30316	0.0469293	0.403892	0.313499	0.811566	-0.00800338	11065470	Hydrogel	1.24894	6.46349e-05	1.24894	1.24894	1.24894
44240813	-1.0735	0.662698	0.370889	0.307423	-0.30316	0.0469293	0.403892	0.313499	0.811566	-0.413648	44240813	Anti-EBV	0.943886	2.82379e-05	0.943886	0.943886	0.943886
13873708	-1.0735	0.312132	0.357775	0.092562	-0.492759	0.0413979	0.626859	0.230938	0.748854	-1.20084	13873708	Anti-EBV	7.15574	0.000769391	7.15574	7.15574	7.15574
122619	-1.0735	0.312132	0.357775	0.092562	-0.492759	0.0413979	0.626859	0.230938	0.748854	-1.6757	122619	Anti-EBV	2.07089	0.000162704	2.07089	2.07089	2.07089
100253	-1.0735	0.662698	0.370889	0.307423	-0.30316	0.0469293	0.403892	0.313499	0.811566	1.04139	100253	Hydrogel	3.17542	0.000294488	3.17542	3.17542	3.17542
321729	-1.0735	0.662698	0.370889	0.307423	-0.30316	0.0469293	0.403892	0.313499	0.811566	0.905574	321729	Hydrogel	2.92608	0.000264739	2.92608	2.92608	2.92608
512718	-1.07203	0.784071	0.43312	0.38743	2.92479	0.157821	0.619124	0.934493	0.820626	0.704692	512718	Anti-EBV	2.47421	0.000210825	2.47421	2.47421	2.47421
9881814	-1.06999	0.805592	0.32462	0.169481	-0.11239	0.0893642	0.408038	0.178205	0.774484	0.905574	9881814	Hydrogel	2.21043	0.000179353	2.21043	2.21043	2.21043
23358719	-1.06999	0.805592	0.32462	0.169481	-0.11239	0.0893642	0.408038	0.178205	0.774484	-0.691598	23358719	Anti-EBV	2.87173	0.000258254	2.87173	2.87173	2.87173
490684	-1.06931	0.63808	0.406003	0.500895	0.612526	0.374339	0.580489	0.625912	0.65857	-2.19668	490684	Anti-EBV	2.81683	0.000251705	2.81683	2.81683	2.81683
5272654	-1.06884	0.405759	0.410892	0.21972	0.17355	0.067041	0.615557	0.387198	0.679826	-1.5057	5272654	Anti-EBV	4.72886	0.000479833	4.72886	4.72886	4.72886
21668257	-1.06868	0.802469	0.445921	0.213631	-0.476002	0.0440494	0.134348	0.0285503	0.465857	0.472413	21668257	Hydrogel	2.97009	0.00026999	2.97009	2.97009	2.97009
67853778	-1.06721	0.584339	0.309297	0.197599	0.400503	0.0451443	0.343232	0.568037	0.534652	-0.832466	67853778	Anti-EBV	8.1346	0.000886183	8.1346	8.1346	8.1346
11832095	-1.06576	0.305682	0.406479	0.126348	0.258928	0.00377386	0.057076	0.0299342	0.393704	-0.00849697	11832095	Anti-EBV	1.06481	4.26652e-05	1.06481	1.06481	1.06481
126567728	-1.06531	0.691816	0.386809	0.28553	0.231234	0.0408994	0.346141	0.317812	0.816905	0.0400991	126567728	Anti-EBV	0.951625	2.91612e-05	0.951625	0.951625	0.951625
501519	-1.06445	0.225151	0.37234	0.0364457	-0.179988	0.16558	0.741138	0.434931	0.808359	0.0400991	501519	Hydrogel	1.059	4.19723e-05	1.059	1.059	1.059
135440057	-1.06317	0.188265	0.390573	0.103477	-0.71769	0.533518	0.202524	0.502087	0.601519	-0.00849697	135440057	Hydrogel	3.61004	0.000346344	3.61004	3.61004	3.61004
131888287	-1.06281	0.425238	0.341457	0.0542972	-0.439164	0.106087	0.13865	0.624306	0.282995	-0.00849697	131888287	Hydrogel	1.68367	0.000116504	1.68367	1.68367	1.68367
11727150	-1.06067	0.541539	0.394168	0.170066	-0.555519	0.0606412	0.179645	0.887182	0.606913	-0.00849697	11727150	Hydrogel	2.23848	0.0001827	2.23848	2.23848	2.23848
10778286	-1.05716	0.671218	0.404771	0.176137	0.751639	0.0378138	0.104646	0.20056	0.478202	0.0400991	10778286	Anti-EBV	1.62416	0.000109404	1.62416	1.62416	1.62416
76973510	-1.05311	0.348027	0.464134	0.101026	-0.286625	0.0150059	0.0456857	0.0174695	0.421058	0.0400991	76973510	Hydrogel	1.30991	7.19092e-05	1.30991	1.30991	1.30991
76973315	-1.05311	0.348027	0.464134	0.101026	-0.286625	0.0150059	0.0456857	0.0174695	0.421058	-0.00849697	76973315	Hydrogel	1.22025	6.12114e-05	1.22025	1.22025	1.22025
11747043	-1.05311	0.351625	0.46392	0.105801	-0.315876	0.0150059	0.0469275	0.0176743	0.421653	-0.00849697	11747043	Hydrogel	1.29672	7.03353e-05	1.29672	1.29672	1.29672
454531	-1.05075	0.758319	0.352524	0.0245455	-0.114671	0.0226327	0.357251	0.308224	0.656322	0.0400991	454531	Hydrogel	0.940916	2.78835e-05	0.940916	0.940916	0.940916
3008139	-1.0506	0.339251	0.402451	0.240807	0.147399	0.34154	0.384403	0.692196	0.612701	0.0400991	3008139	Anti-EBV	0.846222	1.65853e-05	0.846222	0.846222	0.846222
446824	-1.05031	0.397744	0.376718	0.0553533	0.0319635	0.0217177	0.423265	0.290166	0.82382	-0.00849697	446824	Anti-EBV	0.76202	6.5389e-06	0.76202	0.76202	0.76202
4471889	-1.05031	0.397744	0.376718	0.0553533	0.0319635	0.0217177	0.423265	0.290166	0.82382	-0.00849697	4471889	Anti-EBV	0.76202	6.5389e-06	0.76202	0.76202	0.76202
196709	-1.05009	0.595988	0.406502	0.233728	1.07698	0.43893	0.483279	0.661539	0.532358	-1.77378	196709	Anti-EBV	4.86362	0.000495913	4.86362	4.86362	4.86362
53463804	-1.05009	0.595988	0.406502	0.233728	1.07698	0.43893	0.483279	0.661539	0.532358	-0.398101	53463804	Anti-EBV	3.9066	0.000381727	3.9066	3.9066	3.9066
17756793	-1.04938	0.325963	0.400361	0.0373958	-0.423095	0.0615653	0.134317	0.0323343	0.458517	-0.398101	17756793	Hydrogel	0.763531	6.71922e-06	0.763531	0.763531	0.763531
10878902	-1.04938	0.325963	0.400361	0.0373958	-0.423095	0.0615653	0.134317	0.0323343	0.458517	-1.00312	10878902	Anti-EBV	18.4355	0.00211522	18.4355	18.4355	18.4355
46874484	-1.04938	0.325963	0.400361	0.0373958	-0.423095	0.0615653	0.134317	0.0323343	0.458517	-0.178163	46874484	Hydrogel	1.26016	6.59738e-05	1.26016	1.26016	1.26016
100016	-1.04938	0.325963	0.400361	0.0373958	-0.423095	0.0615653	0.134317	0.0323343	0.458517	0.680232	100016	Hydrogel	3.19847	0.000297239	3.19847	3.19847	3.19847
51380955	-1.04938	0.325963	0.400361	0.0373958	-0.423095	0.0615653	0.134317	0.0323343	0.458517	-0.58288	51380955	Anti-EBV	1.19147	5.77774e-05	1.19147	1.19147	1.19147
92970665	-1.04572	0.5265	0.452751	0.0840281	1.21753	0.328376	0.434768	0.841107	0.903384	0.984779	92970665	Anti-EBV	0.869209	1.9328e-05	0.869209	0.869209	0.869209
96622	-1.04529	0.589823	0.370948	0.0988403	-0.366793	0.00610203	0.0443585	0.00694262	0.428863	0.0978377	96622	Hydrogel	1.67551	0.00011553	1.67551	1.67551	1.67551
256040	-1.04529	0.589823	0.370948	0.0988403	-0.366793	0.00610203	0.0443585	0.00694262	0.428863	-2.40903	256040	Anti-EBV	1.41071	8.39356e-05	1.41071	1.41071	1.41071
15839349	-1.04529	0.589823	0.370948	0.0988403	-0.366793	0.00610203	0.0443585	0.00694262	0.428863	-1.0666	15839349	Anti-EBV	45.7132	0.00536979	45.7132	45.7132	45.7132
86295119	-1.04529	0.589823	0.370948	0.0988403	-0.366793	0.00610203	0.0443585	0.00694262	0.428863	-2.1684	86295119	Anti-EBV	1.56146	0.000101922	1.56146	1.56146	1.56146
469074	-1.04465	0.25604	0.373291	0.014978	-1.29139	0.847418	0.545463	0.688507	0.693859	-0.465496	469074	Hydrogel	4.02624	0.000396002	4.02624	4.02624	4.02624
92234642	-1.04195	0.605819	0.392717	0.0297646	-0.704146	0.0979577	0.326124	0.65793	0.824405	-0.0746488	92234642	Hydrogel	3.34232	0.000314402	3.34232	3.34232	3.34232
11725011	-1.04041	0.324543	0.38779	0.200652	0.893159	0.0577081	0.224604	0.533539	0.829318	0.905574	11725011	Hydrogel	0.716182	1.06988e-06	0.716182	0.716182	0.716182
71369906	-1.03983	0.239615	0.402461	0.0588	-0.590309	0.0992012	0.224742	0.47295	0.623002	0.905574	71369906	Hydrogel	5.41303	0.000561464	5.41303	5.41303	5.41303
10266795	-1.0398	0.585877	0.351906	0.0655015	-0.0660455	0.0606746	0.0992909	0.177039	0.65577	0.905574	10266795	Hydrogel	2.11819	0.000168347	2.11819	2.11819	2.11819
156588427	-1.03579	0.661346	0.382524	0.0923589	0.260082	0.0906933	0.238853	0.13547	0.598053	-0.583023	156588427	Anti-EBV	3.3404	0.000314173	3.3404	3.3404	3.3404
92279361	-1.03517	0.589965	0.455462	0.113302	-0.52955	0.00306134	0.0511755	0.0277198	0.585003	-0.257422	92279361	Hydrogel	1.4682	9.07958e-05	1.4682	1.4682	1.4682
639409	-1.03465	0.624505	0.390022	0.153198	-1.22897	0.0621173	0.370123	0.187325	0.556636	0.232223	639409	Hydrogel	9.92624	0.00109995	9.92624	9.92624	9.92624
148033	-1.0315	0.0775147	0.415996	0.141875	1.82079	0.748954	0.735369	0.888057	0.69408	0.232223	148033	Anti-EBV	2.48482	0.000212091	2.48482	2.48482	2.48482
5270727	-1.02871	0.76708	0.360995	0.338694	-0.782543	0.344664	0.550686	0.560285	0.753938	-0.661942	5270727	Hydrogel	1.39986	8.26419e-05	1.39986	1.39986	1.39986
121221202	-1.02695	0.0782879	0.369008	0.016849	1.11359	0.256346	0.472691	0.606888	0.773509	-0.661942	121221202	Anti-EBV	7.58599	0.000820726	7.58599	7.58599	7.58599
451448	-1.02653	0.473707	0.351659	0.0539819	0.960112	0.0413579	0.124273	0.0863276	0.698945	-0.907102	451448	Anti-EBV	22.8144	0.00263767	22.8144	22.8144	22.8144
162011	-1.02653	0.473707	0.351659	0.0539819	0.960112	0.0413579	0.124273	0.0863276	0.698945	-0.907102	162011	Anti-EBV	22.8144	0.00263767	22.8144	22.8144	22.8144
452281	-1.026	0.365348	0.30111	0.0112421	-1.17472	0.69577	0.430081	0.505005	0.693814	-0.907102	452281	Hydrogel	1.83756	0.000134864	1.83756	1.83756	1.83756
20575885	-1.02563	0.272763	0.406205	0.190825	-0.460022	0.0166348	0.0955282	0.0863232	0.530811	-0.907102	20575885	Anti-EBV	6.04058	0.000636339	6.04058	6.04058	6.04058
163320930	-1.02453	0.622292	0.365501	0.065883	-0.630877	0.0255576	0.0894696	0.00888658	0.453032	-0.907102	163320930	Anti-EBV	4.03318	0.00039683	4.03318	4.03318	4.03318
136126104	-1.0215	0.694123	0.408156	0.0640387	-0.278054	0.0977343	0.164304	0.408104	0.542264	0.309457	136126104	Hydrogel	1.82466	0.000133325	1.82466	1.82466	1.82466
135409474	-1.0215	0.694123	0.408156	0.0640387	-0.278054	0.0977343	0.164304	0.408104	0.542264	1.54852	135409474	Hydrogel	4.18161	0.00041454	4.18161	4.18161	4.18161
15516021	-1.02083	0.42298	0.367592	0.130885	-0.126938	0.0161095	0.123186	0.0368799	0.598857	1.54852	15516021	Hydrogel	3.35778	0.000316246	3.35778	3.35778	3.35778
176869	-1.0177	0.673653	0.410813	0.18082	0.443196	0.0151888	0.117522	0.0827165	0.473623	1.54852	176869	Hydrogel	1.7771	0.000127651	1.7771	1.7771	1.7771
511885	-1.01742	0.557724	0.397474	0.0710314	-0.105066	0.230783	0.337639	0.509492	0.809593	1.54852	511885	Hydrogel	3.27024	0.000305802	3.27024	3.27024	3.27024
131885796	-1.01373	0.151224	0.425557	0.0727105	-0.768803	0.11857	0.692108	0.4356	0.540369	-2.3938	131885796	Anti-EBV	0.958088	2.99324e-05	0.958088	0.958088	0.958088
21821194	-1.01359	0.558929	0.339276	0.0936557	-0.116585	0.0195003	0.0901375	0.0344165	0.664727	1.18742	21821194	Hydrogel	2.76293	0.000245273	2.76293	2.76293	2.76293
21820756	-1.00997	0.383064	0.400677	0.0423742	-0.376967	0.0482285	0.330781	0.520818	0.645043	-1.16645	21820756	Anti-EBV	6.42739	0.000682491	6.42739	6.42739	6.42739
92234054	-1.00997	0.383064	0.400677	0.0423742	-0.376967	0.0482285	0.330781	0.520818	0.645043	0.0917395	92234054	Hydrogel	1.75422	0.000124922	1.75422	1.75422	1.75422
92237996	-1.00658	0.412492	0.298855	0.0772388	0.876266	0.173743	0.214715	0.0919086	0.675502	-0.570464	92237996	Anti-EBV	5.39827	0.000559703	5.39827	5.39827	5.39827
14558097	-1.00639	0.480927	0.395403	0.143699	-0.341741	0.0385363	0.0934066	0.0979382	0.482393	1.18514	14558097	Hydrogel	3.95584	0.000387603	3.95584	3.95584	3.95584
17756742	-1.00484	0.275597	0.423884	0.21931	0.521425	0.396393	0.0547123	0.0699557	0.553351	0.0185099	17756742	Anti-EBV	1.40209	8.29073e-05	1.40209	1.40209	1.40209
15729467	-1.00484	0.0734942	0.358126	0.101122	-0.333421	0.0655285	0.120304	0.0237969	0.36317	0.565382	15729467	Hydrogel	2.60021	0.000225858	2.60021	2.60021	2.60021
324452	-1.00476	0.497668	0.433818		1.10823	0.0851569	0.155177	0.0494733	0.564062	-0.632115	324452	Anti-EBV	7.31163	0.000787991	7.31163	7.31163	7.31163
10065192	-1.00258	0.80498	0.401936	0.474704	1.00672	0.313808	0.481879	0.664704	0.555042	-0.30838	10065192	Anti-EBV	3.38614	0.000319631	3.38614	3.38614	3.38614
92264741	-1.00258	0.80498	0.401936	0.474704	1.00672	0.313808	0.481879	0.664704	0.555042	-1.81249	92264741	Anti-EBV	4.21556	0.000418591	4.21556	4.21556	4.21556
471865	-1.00086	0.435748	0.354195	0.0330097	0.0197177	0.694252	0.722887	0.248722	0.717254	-0.770878	471865	Anti-EBV	5.56831	0.00057999	5.56831	5.56831	5.56831
6531437	-1.00086	0.435748	0.354195		0.0197177	0.694252	0.722887	0.248722	0.717254	0.0173277	6531437	Anti-EBV	0.710417	3.82007e-07	0.710417	0.710417	0.710417
93982631	-1.00013	0.235994	0.373179	0.211533	-1.88845	0.0318035	0.249272	0.148618	0.363517	0.0173277	93982631	Hydrogel	2.32689	0.000193248	2.32689	2.32689	2.32689
3065118	-0.999826	0.932296	0.390784	0.0896905	-0.699014	0.0706018	0.317095	0.100308	0.592422	-1.11224	3065118	Anti-EBV	4.49103	0.000451458	4.49103	4.49103	4.49103
455182	-0.99876	0.782353	0.340872	0.145111	0.188996	0.0121887	0.145842	0.792304	0.385753	-1.9872	455182	Anti-EBV	2.40646	0.000202742	2.40646	2.40646	2.40646
454533	-0.99876	0.782353	0.340872	0.145111	0.188996		0.145842	0.792304	0.385753	1.68967	454533	Hydrogel	2.49387	0.000213171	2.49387	2.49387	2.49387
454534	-0.99876	0.782353	0.340872	0.145111	0.188996		0.145842	0.792304	0.385753	0.514411	454534	Hydrogel	1.09455	4.62142e-05	1.09455	1.09455	1.09455
9570	-0.998205	0.610316	0.399131	0.0340028	-0.0604457	0.0323556	0.521207	0.698531	0.830731	0.514411	9570	Hydrogel	1.57401	0.00010342	1.57401	1.57401	1.57401
111261	-0.998205	0.610316	0.399131	0.0340028	-0.0604457	0.0323556	0.521207	0.698531	0.830731	1.03604	111261	Hydrogel	2.36066	0.000197277	2.36066	2.36066	2.36066
92223676	-0.998205	0.610316	0.399131	0.0340028	-0.0604457	0.0323556	0.521207	0.698531	0.830731	-0.143863	92223676	Anti-EBV	0.845175	1.64604e-05	0.845175	0.845175	0.845175
23616817	-0.998205	0.610316	0.399131	0.0340028	-0.0604457	0.0323556	0.521207	0.698531	0.830731	-0.0566338	23616817	Hydrogel	0.712845	6.71711e-07	0.712845	0.712845	0.712845
163947	-0.997861	0.75868	0.378544	0.300179	0.115532	0.599917	0.360054	0.846872	0.426409	0.113622	163947	Anti-EBV	0.709529	2.76068e-07	0.709529	0.709529	0.709529
466039	-0.997175	0.802998	0.460272	0.0645894	-0.948083	0.0327616	0.275894	0.256527	0.481489	-0.959634	466039	Anti-EBV	1.14183	5.18548e-05	1.14183	1.14183	1.14183
121486915	-0.996965	0.290348	0.386612	0.0684623	-1.06502	0.180265	0.274441	0.263659	0.688649	0.937426	121486915	Hydrogel	40.8968	0.00479513	40.8968	40.8968	40.8968
11812423	-0.993891	0.216503	0.401784	0.0557144	1.35319	0.0816488	0.256963	0.813037	0.611434	0.692287	11812423	Anti-EBV	1.2614	6.61215e-05	1.2614	1.2614	1.2614
3080604	-0.988934	0.163496	0.39719	0.0382597	-0.440867	0.0619561	0.333966	0.607366	0.673642	-0.18409	3080604	Hydrogel	1.36965	7.90371e-05	1.36965	1.36965	1.36965
604832	-0.983802	0.1353	0.458129	0.352007	-0.415676	0.48596	0.538113	0.738952	0.818884	-0.18409	604832	Hydrogel	1.28355	6.87644e-05	1.28355	1.28355	1.28355
14367013	-0.983085	0.759819	0.372526	0.0978222	-0.45873	0.0226149	0.110541	0.011108	0.485224	1.06168	14367013	Hydrogel	4.80759	0.000489227	4.80759	4.80759	4.80759
7282398	-0.983085	0.759819	0.372526	0.0978222	-0.45873	0.0226149	0.110541	0.011108	0.485224	-1.92215	7282398	Anti-EBV	1.49675	9.4202e-05	1.49675	1.49675	1.49675
118312477	-0.983085	0.759819	0.372526	0.0978222	-0.45873	0.0226149	0.110541	0.011108	0.485224	-0.704002	118312477	Anti-EBV	1.94989	0.000148267	1.94989	1.94989	1.94989
169704	-0.983085	0.759819	0.372526	0.0978222	-0.45873	0.0226149	0.110541	0.011108	0.485224	0.251371	169704	Hydrogel	2.62221	0.000228484	2.62221	2.62221	2.62221
21824456	-0.983085	0.759819	0.372526	0.0978222	-0.45873	0.0226149	0.110541	0.011108	0.485224	1.72198	21824456	Hydrogel	6.58841	0.000701702	6.58841	6.58841	6.58841
7282400	-0.983085	0.759819	0.372526		-0.45873	0.0226149	0.110541	0.011108	0.485224	-0.534538	7282400	Anti-EBV	0.946091	2.8501e-05	0.946091	0.946091	0.946091
1265899	-0.983085	0.759819	0.372526	0.0978222	-0.45873	0.0226149	0.110541	0.011108	0.485224	-0.534538	1265899	Anti-EBV	0.946091	2.8501e-05	0.946091	0.946091	0.946091
452061	-0.982445	0.724498	0.386645	0.132921	-0.0812127	0.612187	0.441704	0.634628	0.597637	-0.864676	452061	Anti-EBV	10.114	0.00112235	10.114	10.114	10.114
14409039	-0.982445	0.724498	0.386645	0.132921	-0.0812127	0.612187	0.441704	0.634628	0.597637	-0.864676	14409039	Anti-EBV	10.114	0.00112235	10.114	10.114	10.114
121486745	-0.981522	0.41986	0.38393	0.324285	3.33816	0.561283	0.410414	0.855733	0.688091	-0.798402	121486745	Anti-EBV	32.6509	0.00381129	32.6509	32.6509	32.6509
126704	-0.981482	0.0900387	0.343675	0.166269	0.459903	0.054283	0.687796	0.448349	0.808006	0.232217	126704	Anti-EBV	0.972397	3.16396e-05	0.972397	0.972397	0.972397
469184	-0.981482	0.0900387	0.343675	0.166269	0.459903	0.054283	0.687796	0.448349	0.808006	-0.470788	469184	Anti-EBV	3.28429	0.000307477	3.28429	3.28429	3.28429
131850520	-0.980877	0.494643	0.376511	0.095494	-1.27754	0.126672	0.558806	0.515087	0.794614	-0.470788	131850520	Hydrogel	3.13859	0.000290095	3.13859	3.13859	3.13859
3010387	-0.980165	0.649346	0.399597	0.213412	1.61975	0.164228	0.452501	0.877261	0.818737	-0.470788	3010387	Anti-EBV	6.511	0.000692466	6.511	6.511	6.511
50987538	-0.979392	0.325077	0.399351	0.356813	-0.201133	0.333883	0.672295	0.696605	0.833516	-0.122623	50987538	Hydrogel	0.849756	1.7007e-05	0.849756	0.849756	0.849756
512719	-0.979392	0.325077	0.399351	0.356813	-0.201133	0.333883	0.672295	0.696605	0.833516	-0.122623	512719	Hydrogel	0.849756	1.7007e-05	0.849756	0.849756	0.849756
490433	-0.978895	0.067244	0.326388	0.0714842	0.612527	0.088439	0.645805	0.607332	0.804659	-0.122623	490433	Anti-EBV	1.92124	0.000144849	1.92124	1.92124	1.92124
73478	-0.977773	0.805526	0.347966		-0.503962	0.0142669	0.0701959	0.0441951	0.715862	-0.122623	73478	Hydrogel	1.84526	0.000135783	1.84526	1.84526	1.84526
3010378	-0.977376	0.365597	0.439729	0.0794763	0.0245112	0.300793	0.736014	0.581883	0.869872	-1.48684	3010378	Anti-EBV	3.48814	0.0003318	3.48814	3.48814	3.48814
92339825	-0.977376	0.365597	0.439729	0.0794763	0.0245112	0.300793	0.736014	0.581883	0.869872	-1.32123	92339825	Anti-EBV	4.82748	0.000491601	4.82748	4.82748	4.82748
136592262	-0.97476	0.850354	0.375322	0.121599	-0.705253	0.0635842	0.110294	0.590352	0.581905	0.232036	136592262	Hydrogel	5.62515	0.000586773	5.62515	5.62515	5.62515
24885222	-0.974525	0.192741	0.382491	0.306518	0.139857	0.0398521	0.146375	0.118344	0.622817	-2.71756	24885222	Anti-EBV	1.61125	0.000107863	1.61125	1.61125	1.61125
3010291	-0.974115	0.716265	0.389507	0.158201	1.23078	0.0587699	0.29058	0.491229	0.746612	-0.0952192	3010291	Anti-EBV	2.8407	0.000254552	2.8407	2.8407	2.8407
512135	-0.972242	0.753367	0.432688	0.179564	-0.182235	0.100014	0.665732	0.772017	0.831444	-2.05269	512135	Anti-EBV	1.74113	0.00012336	1.74113	1.74113	1.74113
92253117	-0.970792	0.334559	0.397005	0.163022	0.856328	0.170879	0.110229	0.0845089	0.37327	1.55501	92253117	Hydrogel	1.24789	6.45092e-05	1.24789	1.24789	1.24789
57358089	-0.970792	0.334559	0.397005	0.163022	0.856328	0.170879	0.110229	0.0845089	0.37327	1.55501	57358089	Hydrogel	1.24789	6.45092e-05	1.24789	1.24789	1.24789
92236430	-0.96961	0.359856	0.407931	0.247479	0.0455708	0.174803	0.643302	0.498155	0.818504	1.55501	92236430	Hydrogel	2.80982	0.000250867	2.80982	2.80982	2.80982
10467227	-0.968831	0.800167	0.395213	0.160308	0.386674	0.234953	0.615047	0.367974	0.761814	1.55501	10467227	Hydrogel	1.92603	0.00014542	1.92603	1.92603	1.92603
14162719	-0.965843	0.346915	0.33078	0.106713	0.341831	0.0249141	0.308349	0.694718	0.81365	1.55501	14162719	Hydrogel	2.01911	0.000156525	2.01911	2.01911	2.01911
3081162	-0.965843	0.346915	0.33078	0.106713	0.341831	0.0249141	0.308349	0.694718	0.81365	1.55501	3081162	Hydrogel	2.01911	0.000156525	2.01911	2.01911	2.01911
162642336	-0.965587	0.610774	0.397822	0.0340028	-0.0604457	0.0323556	0.521207	0.706415	0.83121	1.55501	162642336	Hydrogel	3.23109	0.00030113	3.23109	3.23109	3.23109
14730263	-0.965172	0.307965	0.376231	0.160109	1.74548	0.0609368	0.375023	0.93186	0.78046	-1.70224	14730263	Anti-EBV	5.90791	0.00062051	5.90791	5.90791	5.90791
135788877	-0.956544	0.618734	0.391865	0.123146	0.843421	0.18033	0.0708941	0.586463	0.570419	-1.70224	135788877	Anti-EBV	4.12065	0.000407267	4.12065	4.12065	4.12065
21821293	-0.955594	0.173865	0.419038	0.0305146	-1.09681	0.213655	0.387089	0.403311	0.629136	-0.188416	21821293	Hydrogel	8.38923	0.000916562	8.38923	8.38923	8.38923
69907861	-0.955509	0.0555058	0.36416	0.0618801	0.107096	0.0052122	0.181286	0.0481936	0.37268	-0.298021	69907861	Anti-EBV	1.57845	0.00010395	1.57845	1.57845	1.57845
455180	-0.954698	0.906845	0.367727	0.0405328	-0.975136	0.0227991	0.168023	0.45232	0.654089	-0.298021	455180	Hydrogel	46.1142	0.00541764	46.1142	46.1142	46.1142
21145872	-0.954698	0.906845	0.367727	0.0405328	-0.975136	0.0227991	0.168023	0.45232	0.654089	-0.292726	21145872	Hydrogel	46.4804	0.00546132	46.4804	46.4804	46.4804
10400774	-0.954698	0.906845	0.367727	0.0405328	-0.975136		0.168023	0.45232	0.654089	-1.1227	10400774	Nontox	0.902892	2.33468e-05	0.902892	0.902892	0.902892
10445690	-0.954698	0.906845	0.367727	0.0405328	-0.975136		0.168023	0.45232	0.654089	-1.04909	10445690	Nontox	1.09771	4.65916e-05	1.09771	1.09771	1.09771
14156718	-0.95465	0.721776	0.369741	0.197479	-0.277955	0.318167	0.222098	0.546175	0.627688	-1.04909	14156718	Anti-EBV	10.8386	0.0012088	10.8386	10.8386	10.8386
15119224	-0.953517	0.351907	0.408556	0.0733988	0.0378225	0.201431	0.448201	0.711239	0.666098	-0.313604	15119224	Anti-EBV	1.48373	9.26482e-05	1.48373	1.48373	1.48373
129674064	-0.953347	0.50951	0.437182	0.105696	0.796724	0.504817	0.621495	0.440176	0.668971	0.67905	129674064	Anti-EBV	0.809046	1.21498e-05	0.809046	0.809046	0.809046
22880825	-0.952928	0.61665	0.431222	0.181513	0.678093	0.0665823	0.638206	0.74311	0.691818	-0.261263	22880825	Anti-EBV	2.62771	0.000229139	2.62771	2.62771	2.62771
481527	-0.952367	0.850378	0.390574	0.268193	0.528792	0.0398447	0.349552	0.878526	0.772858	-0.261263	481527	Anti-EBV	2.32376	0.000192875	2.32376	2.32376	2.32376
156594202	-0.952181	0.265173	0.365221	0.242863	2.35452	0.567495	0.396562	0.835951	0.724874	0.693027	156594202	Anti-EBV	2.1353	0.000170389	2.1353	2.1353	2.1353
3011900	-0.951003	0.234374	0.400539	0.37623	0.0121136	0.618374	0.50505	0.702414	0.791441	-1.17569	3011900	Anti-EBV	6.76876	0.00072322	6.76876	6.76876	6.76876
9885936	-0.948416	0.122408	0.357592	0.139192	1.53851	0.235167	0.766221	0.954886	0.796281	-0.348869	9885936	Anti-EBV	5.15894	0.000531148	5.15894	5.15894	5.15894
355033	-0.947411	0.0737146	0.32978	0.0336816	-1.85166	0.0426705	0.167155	0.576082	0.304135	0.112076	355033	Hydrogel	2.36407	0.000197684	2.36407	2.36407	2.36407
21826754	-0.947157	0.163981	0.416971	0.135291	1.11821	0.0826793	0.140515	0.0135902	0.429763	1.29609	21826754	Hydrogel	0.828901	1.45188e-05	0.828901	0.828901	0.828901
92252368	-0.947157	0.163981	0.416971	0.135291	1.11821	0.0826793	0.140515	0.0135902	0.429763	1.29609	92252368	Hydrogel	0.828901	1.45188e-05	0.828901	0.828901	0.828901
117647970	-0.946922	0.306789	0.404322	0.12901	-0.20536	0.00709495	0.155283	0.0386624	0.404472	-0.223009	117647970	Anti-EBV	0.741573	4.09933e-06	0.741573	0.741573	0.741573
53759423	-0.946648	0.805941	0.437366	0.0516262	0.150208	0.0179586	0.0855015	0.0389263	0.330408	-0.471764	53759423	Anti-EBV	2.55928	0.000220975	2.55928	2.55928	2.55928
11849876	-0.946301	0.438366	0.380631	0.0828161	0.354426	0.0192622	0.196906	0.061068	0.392063	-0.376152	11849876	Anti-EBV	2.51919	0.000216192	2.51919	2.51919	2.51919
134715452	-0.945865	0.933023	0.360986	0.090076	0.230964	0.191592	0.0902509	0.375576	0.566729	-0.376152	134715452	Anti-EBV	2.21411	0.000179792	2.21411	2.21411	2.21411
14310518	-0.945634	0.831598	0.373314	0.214764	0.76602	0.292718	0.332226	0.254499	0.656967	-0.122623	14310518	Anti-EBV	2.23406	0.000182172	2.23406	2.23406	2.23406
14498611	-0.945634	0.648515	0.356531	0.192645	0.69884	0.284111	0.404221	0.203046	0.564139	-0.840604	14498611	Anti-EBV	21.4326	0.0024728	21.4326	21.4326	21.4326
500903	-0.944963	0.202619	0.39312	0.37779	0.0461467	0.0305137	0.0690277	0.0243988	0.414545	0.576599	500903	Hydrogel	1.46399	9.02927e-05	1.46399	1.46399	1.46399
13830457	-0.944963	0.202619	0.39312	0.37779	0.0461467	0.0305137	0.0690277	0.0243988	0.414545	-1.3886	13830457	Anti-EBV	3.86641	0.000376933	3.86641	3.86641	3.86641
137705912	-0.944963	0.202619	0.39312	0.37779	0.0461467	0.0305137	0.0690277	0.0243988	0.414545	1.04008	137705912	Hydrogel	2.12532	0.000169199	2.12532	2.12532	2.12532
54180064	-0.943885	0.252771	0.389062	0.108159	-0.0589877	0.715203	0.14731	0.647534	0.526659	-0.553294	54180064	Anti-EBV	2.49675	0.000213515	2.49675	2.49675	2.49675
23519662	-0.943044	0.482969	0.402653	0.299674	0.143082	0.123431	0.103833	0.0554274	0.556866	-0.553294	23519662	Anti-EBV	3.2338	0.000301454	3.2338	3.2338	3.2338
10849717	-0.942774	0.50877	0.409293	0.315692	-0.232285	0.0710826	0.132418	0.0691565	0.552331	-0.553294	10849717	Anti-EBV	1.87263	0.000139049	1.87263	1.87263	1.87263
278758	-0.942431	0.62067	0.421376	0.0536258	0.273989	0.0897461	0.337708	0.524368	0.72804	-0.553294	278758	Anti-EBV	3.71351	0.00035869	3.71351	3.71351	3.71351
21677555	-0.941903	0.867983	0.302401	0.0572172	2.47615	0.174091	0.28948	0.439104	0.403873	0.101513	21677555	Anti-EBV	3.92556	0.00038399	3.92556	3.92556	3.92556
5273506	-0.94107	0.626153	0.406783	0.0473293	-0.343741	0.032115	0.397454	0.716149	0.800448	0.620959	5273506	Hydrogel	2.99102	0.000272487	2.99102	2.99102	2.99102
59504000	-0.93989	0.160984	0.418102	0.18148	-0.539026	0.0295825	0.100227	0.0977154	0.52117	0.113219	59504000	Hydrogel	3.00806	0.000274521	3.00806	3.00806	3.00806
59504127	-0.93989	0.160984	0.418102	0.18148	-0.539026	0.0295825	0.100227	0.0977154	0.52117	-0.244745	59504127	Hydrogel	1.74524	0.00012385	1.74524	1.74524	1.74524
59504108	-0.93989	0.160984	0.418102	0.18148	-0.539026	0.0295825	0.100227	0.0977154	0.52117	-0.772619	59504108	Anti-EBV	2.68183	0.000235597	2.68183	2.68183	2.68183
58463530	-0.939589	0.213899	0.40764	0.37779	0.0958621	0.0305137	0.0636843	0.0257242	0.423451	-0.715679	58463530	Anti-EBV	5.83243	0.000611503	5.83243	5.83243	5.83243
6479205	-0.936714	0.556595	0.415988	0.250113	-0.528597	0.594606	0.499228	0.678482	0.710026	-2.29547	6479205	Anti-EBV	1.13187	5.06665e-05	1.13187	1.13187	1.13187
121486746	-0.936697	0.850889	0.407187	0.0580526	-0.24924	0.0815534	0.230744	0.529772	0.618429	-1.38168	121486746	Anti-EBV	2.89184	0.000260654	2.89184	2.89184	2.89184
452081	-0.935343	0.523431	0.35204	0.132364	-0.422687	0.111957	0.247963	0.514869	0.400701	-1.56728	452081	Anti-EBV	1.85433	0.000136866	1.85433	1.85433	1.85433
163320836	-0.935153	0.295754	0.395845	0.157866	0.166461	0.23185	0.438836	0.517831	0.60612	3.10715	163320836	Hydrogel	4.48221	0.000450405	4.48221	4.48221	4.48221
14102245	-0.935153	0.295754	0.395845	0.157866	0.166461	0.23185	0.438836	0.517831	0.60612	3.10715	14102245	Hydrogel	4.48221	0.000450405	4.48221	4.48221	4.48221
54703164	-0.934619	0.677687	0.421187	0.103723	0.143082	0.0177827	0.0573329	0.0312343	0.463209	-2.66495	54703164	Anti-EBV	1.58791	0.000105078	1.58791	1.58791	1.58791
92299334	-0.934619	0.677687	0.421187	0.103723	0.143082	0.0177827	0.0573329	0.0312343	0.463209	0.626032	92299334	Hydrogel	1.34084	7.55996e-05	1.34084	1.34084	1.34084
54677885	-0.934619	0.677687	0.421187	0.103723	0.143082	0.0177827	0.0573329	0.0312343	0.463209	1.08548	54677885	Hydrogel	1.94374	0.000147533	1.94374	1.94374	1.94374
121487026	-0.933865	0.345689	0.441071	0.181653	-0.561172	0.176671	0.0474664	0.0626181	0.567457	-0.118166	121487026	Hydrogel	2.38804	0.000200544	2.38804	2.38804	2.38804
5271786	-0.933235	0.388527	0.360975	0.130298	-1.10717	0.113146	0.233474	0.495457	0.374224	-0.196262	5271786	Hydrogel	6.69861	0.000714851	6.69861	6.69861	6.69861
13712878	-0.933164	0.378697	0.394947	0.317554	-0.510077	0.287879	0.69111	0.700171	0.850242	-0.220131	13712878	Hydrogel	1.67623	0.000115615	1.67623	1.67623	1.67623
478561	-0.930655	0.576222	0.448715	0.0381736	0.42133	0.284145	0.387593	0.238177	0.747484	-1.05998	478561	Anti-EBV	15.4895	0.00176372	15.4895	15.4895	15.4895
92132205	-0.929059	0.161037	0.384352	0.0925024	0.578713	0.0294412	0.558558	0.846482	0.802264	-1.05998	92132205	Anti-EBV	16.9919	0.00194297	16.9919	16.9919	16.9919
124428631	-0.929059	0.161037	0.384352	0.0925024	0.578713	0.0294412	0.558558	0.846482	0.802264	-1.05998	124428631	Anti-EBV	16.9919	0.00194297	16.9919	16.9919	16.9919
27191376	-0.929059	0.161037	0.384352	0.0925024	0.578713	0.0294412	0.558558	0.846482	0.802264	-0.453153	27191376	Anti-EBV	3.77331	0.000365824	3.77331	3.77331	3.77331
29982343	-0.929059	0.161037	0.384352	0.0925024	0.578713	0.0294412	0.558558	0.846482	0.802264	-2.21517	29982343	Anti-EBV	2.36504	0.0001978	2.36504	2.36504	2.36504
107502	-0.929059	0.161037	0.384352	0.0925024	0.578713	0.0294412	0.558558	0.846482	0.802264	-2.28335	107502	Anti-EBV	2.28157	0.00018784	2.28157	2.28157	2.28157
45039580	-0.929059	0.161037	0.384352	0.0925024	0.578713	0.0294412	0.558558	0.846482	0.802264	-1.20763	45039580	Anti-EBV	8.36104	0.000913199	8.36104	8.36104	8.36104
492409	-0.924679	0.154318	0.32824	0.0323701	1.34252	0.0164028	0.289498	0.910489	0.783052	-0.147065	492409	Anti-EBV	3.41609	0.000323204	3.41609	3.41609	3.41609
6334060	-0.924275	0.402366	0.417379	0.0756235	-0.157824	0.517651	0.528655	0.463633	0.71152	-1.77486	6334060	Anti-EBV	1.98141	0.000152028	1.98141	1.98141	1.98141
10106801	-0.923614	0.48364	0.372189	0.104237	0.980481	0.0271749	0.191934	0.255008	0.811801	-3.53185	10106801	Anti-EBV	1.73952	0.000123167	1.73952	1.73952	1.73952
71346314	-0.923614	0.48364	0.372189	0.104237	0.980481	0.0271749	0.191934	0.255008	0.811801	-3.53185	71346314	Anti-EBV	1.73952	0.000123167	1.73952	1.73952	1.73952
45484443	-0.922454	0.237853	0.404737	0.0628807	1.30274	0.0240428	0.33339	0.927054	0.69203	-3.53185	45484443	Anti-EBV	1.91308	0.000143876	1.91308	1.91308	1.91308
126567807	-0.91831	0.53327	0.374027	0.418151	-0.867467	0.0156555	0.352656	0.478315	0.638083	-1.05998	126567807	Anti-EBV	1.21451	6.05272e-05	1.21451	1.21451	1.21451
92143143	-0.917515	0.53849	0.417345	0.0635549	-1.61472	0.0434655	0.330327	0.216988	0.503231	-1.60514	92143143	Nontox	102.043	0.0120906	102.043	102.043	102.043
492408	-0.91698	0.25555	0.329296	0.0424794	0.580436	0.0255794	0.237135	0.65539	0.785433	-0.597055	492408	Anti-EBV	5.91189	0.000620984	5.91189	5.91189	5.91189
3082596	-0.914003	0.549912	0.397681	0.353548	-0.716662	0.229581	0.158273	0.159864	0.61343	-0.447042	3082596	Hydrogel	2.6391	0.000230499	2.6391	2.6391	2.6391
18604151	-0.913446	0.254046	0.406227	0.139363	0.0729333	0.0501014	0.112196	0.0322009	0.657003	-0.22727	18604151	Anti-EBV	1.3258	7.38051e-05	1.3258	1.3258	1.3258
131884916	-0.912571	0.194164	0.426032	0.181934	0.378575	0.492537	0.763117	0.766086	0.627349	-0.22727	131884916	Anti-EBV	1.95731	0.000149152	1.95731	1.95731	1.95731
10490949	-0.91151	0.563452	0.365325	0.0474297	0.0469269	0.0605342	0.282559	0.484857	0.698508	-0.104905	10490949	Anti-EBV	0.973295	3.17468e-05	0.973295	0.973295	0.973295
10705876	-0.91151	0.563452	0.365325	0.0474297	0.0469269	0.0605342	0.282559	0.484857	0.698508	-0.104905	10705876	Anti-EBV	0.973295	3.17468e-05	0.973295	0.973295	0.973295
95121	-0.911369	0.117952	0.295908	0.00896981	-1.0354	0.647611	0.362061	0.82815	0.575809	-0.104905	95121	Hydrogel	9.9017	0.00109702	9.9017	9.9017	9.9017
23238948	-0.910265	0.538911	0.407267	0.141473	-0.317039	0.0241575	0.111386	0.0311067	0.443257	-0.750533	23238948	Anti-EBV	4.5447	0.000457862	4.5447	4.5447	4.5447
6334197	-0.908708	0.34428	0.375071	0.224265	-0.266807	0.272603	0.275724	0.734756	0.692937	-0.983646	6334197	Anti-EBV	12.8184	0.00144502	12.8184	12.8184	12.8184
131884919	-0.907414	0.528242	0.431411	0.309742	3.05744	0.382651	0.775354	0.889273	0.650482	0.157903	131884919	Anti-EBV	4.55619	0.000459233	4.55619	4.55619	4.55619
44438827	-0.906393	0.552633	0.41448	0.136639	0.620103	0.0800779	0.0696802	0.0311436	0.461535	0.77838	44438827	Hydrogel	0.853734	1.74816e-05	0.853734	0.853734	0.853734
196459	-0.905455	0.503306	0.383309	0.200355	1.54806	0.0211906	0.484388	0.640832	0.811826	-0.513653	196459	Anti-EBV	8.1486	0.000887853	8.1486	8.1486	8.1486
5273015	-0.905455	0.73341	0.375272	0.0432995	2.48903	0.0344401	0.422511	0.465223	0.768025	-0.513653	5273015	Anti-EBV	11.5449	0.00129308	11.5449	11.5449	11.5449
387072	-0.905436	0.430241	0.391921	0.0161839	-0.990286	0.521343	0.796142	0.629544	0.769264	-0.513653	387072	Hydrogel	7.23588	0.000778954	7.23588	7.23588	7.23588
189148	-0.904194	0.590591	0.441583	0.131497	-0.955434	0.0428544	0.0975531	0.0185615	0.525325	-0.513653	189148	Hydrogel	11.4829	0.00128567	11.4829	11.4829	11.4829
150619	-0.903924	0.470686	0.401036	0.106187	0.0148955	0.0242974	0.0595452	0.0395469	0.414016	-0.513653	150619	Anti-EBV	2.6223	0.000228494	2.6223	2.6223	2.6223
266482	-0.902928	0.39305	0.379599	0.0805891	-1.15435	0.0429056	0.269997	0.6058	0.475926	-0.513653	266482	Hydrogel	2.89656	0.000261217	2.89656	2.89656	2.89656
163285434	-0.902782	0.534683	0.431061	0.0539819	0.866881	0.0409343	0.113676	0.107177	0.700075	-1.03045	163285434	Anti-EBV	20.3086	0.00233869	20.3086	20.3086	20.3086
22880806	-0.902278	0.767267	0.42411	0.37371	0.829462	0.181641	0.467283	0.808989	0.675451	-0.415408	22880806	Anti-EBV	4.32297	0.000431406	4.32297	4.32297	4.32297
131843075	-0.897193	0.233737	0.320105	0.0378814	2.91044	0.334832	0.641431	0.328934	0.727445	0.275718	131843075	Anti-EBV	3.88383	0.00037901	3.88383	3.88383	3.88383
21140290	-0.894268	0.628775	0.426367	0.482971	0.99895	0.23244	0.679024	0.84682	0.875787	0.275718	21140290	Anti-EBV	1.58129	0.000104288	1.58129	1.58129	1.58129
53792010	-0.89327	0.272997	0.368756	0.05851	0.916617	0.0213911	0.0572949	0.0225829	0.383378	-0.297904	53792010	Anti-EBV	3.59196	0.000344186	3.59196	3.59196	3.59196
21769885	-0.893248	0.186752	0.388904	0.343368	-0.145642	0.387854	0.109595	0.0855625	0.564614	-0.192835	21769885	Anti-EBV	0.802378	1.13542e-05	0.802378	0.802378	0.802378
15172905	-0.892957	0.530947	0.383686	0.15509	0.387547	0.257768	0.313632	0.707376	0.406134	-1.07491	15172905	Anti-EBV	10.6587	0.00118734	10.6587	10.6587	10.6587
57324057	-0.892418	0.452018	0.402291	0.0767209	0.709948	0.359169	0.427822	0.472535	0.81445	-0.794951	57324057	Anti-EBV	22.5394	0.00260486	22.5394	22.5394	22.5394
96851	-0.892418	0.452018	0.402291	0.0767209	0.709948	0.359169	0.427822	0.472535	0.81445	-0.513795	96851	Anti-EBV	5.27778	0.000545327	5.27778	5.27778	5.27778
15172876	-0.890867	0.622708	0.392749	0.183638	0.753637	0.259015	0.187047	0.740543	0.631171	-1.06672	15172876	Anti-EBV	13.9314	0.00157782	13.9314	13.9314	13.9314
92234638	-0.890585	0.413962	0.403162	0.0301394	0.412934	0.0271304	0.441467	0.624738	0.835858	-0.644496	92234638	Anti-EBV	6.78352	0.000724981	6.78352	6.78352	6.78352
21139659	-0.890585	0.413962	0.403162	0.0301394	0.412934	0.0271304	0.441467	0.624738	0.835858	-0.0401005	21139659	Anti-EBV	1.4604	8.9865e-05	1.4604	1.4604	1.4604
46875748	-0.889769	0.627814	0.390274	0.616338	0.480652	0.19804	0.772153	0.872989	0.834971	-0.0401005	46875748	Anti-EBV	1.57384	0.000103399	1.57384	1.57384	1.57384
14978	-0.889769	0.627814	0.390274	0.616338	0.480652	0.19804	0.772153	0.872989	0.834971	-1.54115	14978	Anti-EBV	3.68233	0.00035497	3.68233	3.68233	3.68233
3007220	-0.889769	0.627814	0.390274	0.616338	0.480652	0.19804	0.772153	0.872989	0.834971	-0.801263	3007220	Anti-EBV	21.1872	0.00244353	21.1872	21.1872	21.1872
92209900	-0.889769	0.627814	0.390274	0.616338	0.480652	0.19804	0.772153	0.872989	0.834971	-1.26011	92209900	Anti-EBV	5.94004	0.000624344	5.94004	5.94004	5.94004
135519069	-0.887929	0.701507	0.357221	0.132351	-1.19233	0.0464849	0.123204	0.693299	0.561988	-0.934876	135519069	Nontox	0.964932	3.0749e-05	0.964932	0.964932	0.964932
135704021	-0.887929	0.701507	0.357221	0.132351	-1.19233	0.0464849	0.123204	0.693299	0.561988	-0.546702	135704021	Hydrogel	2.29228	0.000189119	2.29228	2.29228	2.29228
121487517	-0.887434	0.554047	0.379049	0.111355	-0.549841	0.0606901	0.0931411	0.0135915	0.574109	-0.477831	121487517	Hydrogel	1.00872	3.59739e-05	1.00872	1.00872	1.00872
135427250	-0.884422	0.826297	0.324528	0.0665796	0.378176	0.211793	0.0884435	0.321061	0.495142	-0.122598	135427250	Anti-EBV	1.63669	0.000110898	1.63669	1.63669	1.63669
53775732	-0.883107	0.325313	0.414443	0.0959847	-0.211644	0.0144696	0.0447132	0.0180716	0.412589	-2.90765	53775732	Anti-EBV	1.17614	5.59486e-05	1.17614	1.17614	1.17614
3007909	-0.882202	0.615955	0.380876	0.437218	0.293981	0.0192567	0.115382	0.0336571	0.4973	-1.27155	3007909	Anti-EBV	4.97915	0.000509697	4.97915	4.97915	4.97915
124565863	-0.882014	0.0749369	0.29689	0.0221578	-0.81593	0.76434	0.549413	0.550785	0.578096	1.15568	124565863	Hydrogel	42.8907	0.00503304	42.8907	42.8907	42.8907
58451159	-0.882014	0.0749369	0.29689	0.0221578	-0.81593	0.76434	0.549413	0.550785	0.578096	-0.488684	58451159	Hydrogel	7.70859	0.000835354	7.70859	7.70859	7.70859
135405922	-0.881226	0.767297	0.407638	0.209445	2.11267	0.262109	0.0992392	0.253352	0.506677	0.0173277	135405922	Anti-EBV	4.00485	0.00039345	4.00485	4.00485	4.00485
135455558	-0.87882	0.658349	0.395127	0.122278	-0.460015	0.856057	0.187297	0.616929	0.653175	0.0777738	135455558	Hydrogel	2.52302	0.000216649	2.52302	2.52302	2.52302
135459781	-0.87882	0.658349	0.395127	0.122278	-0.460015	0.856057	0.187297	0.616929	0.653175	-2.34212	135459781	Anti-EBV	1.11185	4.82785e-05	1.11185	1.11185	1.11185
481518	-0.878226	0.839128	0.377551	0.152541	1.73444	0.0303909	0.102567	0.242737	0.458891	0.769907	481518	Anti-EBV	1.53473	9.87335e-05	1.53473	1.53473	1.53473
14541163	-0.877716	0.371673	0.380278	0.0718579	0.383248	0.0449025	0.36384	0.765231	0.719837	0.910336	14541163	Hydrogel	1.29824	7.05168e-05	1.29824	1.29824	1.29824
452054	-0.877716	0.371673	0.380278	0.0718579	0.383248	0.0449025	0.36384	0.765231	0.719837	-2.2901	452054	Anti-EBV	1.96968	0.000150629	1.96968	1.96968	1.96968
452051	-0.877716	0.371673	0.380278	0.0718579	0.383248	0.0449025	0.36384	0.765231	0.719837	-1.61119	452051	Anti-EBV	3.13831	0.00029006	3.13831	3.13831	3.13831
511984	-0.874895	0.84954	0.453349	0.244361	0.698617	0.0084056	0.126768	0.363781	0.460513	0.44426	511984	Anti-EBV	0.979783	3.25208e-05	0.979783	0.979783	0.979783
3010383	-0.874522	0.791002	0.417806	0.262365	0.666848	0.4157	0.764639	0.83634	0.824681	0.44426	3010383	Anti-EBV	0.945792	2.84653e-05	0.945792	0.945792	0.945792
15104850	-0.873707	0.893625	0.332378	0.160264	1.0358	0.0753971	0.297243	0.502869	0.659345	-0.479914	15104850	Anti-EBV	6.1502	0.000649418	6.1502	6.1502	6.1502
10977550	-0.871752	0.112984	0.330965	0.113638	-0.27797	0.0486557	0.182982	0.0575176	0.636361	-0.800066	10977550	Anti-EBV	11.0048	0.00122864	11.0048	11.0048	11.0048
44355029	-0.867956	0.268809	0.392472	0.158007	0.342464	0.0196271	0.512344	0.716265	0.763892	-0.800066	44355029	Anti-EBV	24.502	0.00283903	24.502	24.502	24.502
137176604	-0.866888	0.694377	0.431702	0.100531	1.86155	0.0705015	0.313149	0.932648	0.825519	0.535241	137176604	Anti-EBV	2.04483	0.000159594	2.04483	2.04483	2.04483
57105083	-0.866773	0.821784	0.380704	0.17978	0.984719	0.158904	0.528622	0.483727	0.793046	0.535241	57105083	Anti-EBV	1.16048	5.40809e-05	1.16048	1.16048	1.16048
139025303	-0.864537	0.5879	0.425132	0.0804652	0.238833	0.0134865	0.0809847	0.0266556	0.419777	0.535241	139025303	Hydrogel	1.087	4.53138e-05	1.087	1.087	1.087
46781591	-0.864537	0.5879	0.425132	0.0804652	0.238833	0.0134865	0.0809847	0.0266556	0.419777	0.535241	46781591	Hydrogel	1.087	4.53138e-05	1.087	1.087	1.087
10563947	-0.864329	0.172375	0.397222	0.33798	0.503345	0.140314	0.0849527	0.0371474	0.456837	-0.121794	10563947	Anti-EBV	1.89769	0.00014204	1.89769	1.89769	1.89769
126961829	-0.863909	0.323477	0.437191	0.194402	0.735373	0.505696	0.784617	0.810646	0.633047	-0.121794	126961829	Anti-EBV	2.34053	0.000194875	2.34053	2.34053	2.34053
3010384	-0.860181	0.543458	0.410362	0.510908	1.25706	0.357336	0.55788	0.842608	0.8196	1.75422	3010384	Hydrogel	1.03918	3.96081e-05	1.03918	1.03918	1.03918
92246004	-0.860181	0.543458	0.410362	0.510908	1.25706	0.357336	0.55788	0.842608	0.8196	0.803913	92246004	Anti-EBV	1.0922	4.59335e-05	1.0922	1.0922	1.0922
510946	-0.859524	0.21301	0.325144	0.0456034	-0.243799	0.0211878	0.2349	0.779518	0.77325	0.905574	510946	Hydrogel	3.34694	0.000314953	3.34694	3.34694	3.34694
11173202	-0.858641	0.51382	0.430402	0.111318	0.164738	0.152062	0.513246	0.320313	0.662674	1.52524	11173202	Hydrogel	2.58715	0.0002243	2.58715	2.58715	2.58715
56987376	-0.858613	0.303274	0.309912	0.0473898	1.24218	0.223062	0.568028	0.788619	0.585555	-1.89498	56987376	Anti-EBV	3.57377	0.000342016	3.57377	3.57377	3.57377
512137	-0.858268	0.829684	0.435743	0.0710876	0.186298	0.0272441	0.378998	0.578242	0.858537	-1.89498	512137	Anti-EBV	2.132	0.000169995	2.132	2.132	2.132
451365	-0.858117	0.427897	0.327313	0.178044	-0.704967	0.115035	0.332309	0.398424	0.351075	1.34167	451365	Hydrogel	19.6042	0.00225466	19.6042	19.6042	19.6042
14308796	-0.858117	0.427897	0.327313	0.178044	-0.704967	0.115035	0.332309	0.398424	0.351075	0.0914571	14308796	Hydrogel	8.06065	0.000877359	8.06065	8.06065	8.06065
122088	-0.858117	0.427897	0.327313	0.178044	-0.704967	0.115035	0.332309	0.398424	0.351075	0.0914571	122088	Hydrogel	8.06065	0.000877359	8.06065	8.06065	8.06065
21140410	-0.856283	0.821264	0.414665	0.0438795	-0.0884254	0.0332818	0.301375	0.592358	0.842152	0.62473	21140410	Hydrogel	2.02053	0.000156696	2.02053	2.02053	2.02053
135600340	-0.853076	0.79783	0.389016	0.150061	0.149017	0.111146	0.195601	0.413501	0.597607	-0.0397193	135600340	Anti-EBV	1.03525	3.91389e-05	1.03525	1.03525	1.03525
136663945	-0.853076	0.79783	0.389016	0.150061	0.149017	0.111146	0.195601	0.413501	0.597607	-0.0397193	136663945	Anti-EBV	1.03525	3.91389e-05	1.03525	1.03525	1.03525
502244	-0.852879	0.153364	0.289251	0.0533599	-0.965131	0.0333453	0.35263	0.0778314	0.514971	-0.0397193	502244	Hydrogel	10.9504	0.00122214	10.9504	10.9504	10.9504
3006926	-0.850322	0.472998	0.327017	0.0208653	0.231274	0.0326466	0.208508	0.0485297	0.645503	1.04021	3006926	Hydrogel	1.76479	0.000126182	1.76479	1.76479	1.76479
91809617	-0.849253	0.85204	0.396503	0.482608	2.62991	0.343634	0.464422	0.818576	0.524374	-1.08209	91809617	Anti-EBV	21.838	0.00252117	21.838	21.838	21.838
102339225	-0.847673	0.484637	0.39116	0.190852	0.547015	0.19814	0.189567	0.918065	0.57889	0.087311	102339225	Anti-EBV	1.40241	8.2946e-05	1.40241	1.40241	1.40241
137937484	-0.846294	0.332162	0.401292	0.410412	-0.482526	0.103495	0.24192	0.781792	0.379912	-0.34945	137937484	Hydrogel	1.22442	6.17091e-05	1.22442	1.22442	1.22442
14061175	-0.846294	0.332162	0.401292	0.410412	-0.482526	0.103495	0.24192	0.781792	0.379912	-0.29992	14061175	Hydrogel	1.41697	8.46825e-05	1.41697	1.41697	1.41697
5270589	-0.845327	0.541032	0.368054	0.127558	0.395377	0.0143487	0.0864999	0.0166208	0.377502	0.630699	5270589	Hydrogel	0.975326	3.19892e-05	0.975326	0.975326	0.975326
97297	-0.845151	0.693373	0.410674	0.534456	2.44263	0.451374	0.693808	0.923426	0.838685	-0.535865	97297	Anti-EBV	14.3257	0.00162486	14.3257	14.3257	14.3257
45039587	-0.845151	0.693373	0.410674	0.534456	2.44263	0.451374	0.693808	0.923426	0.838685	1.59208	45039587	Anti-EBV	1.20063	5.88711e-05	1.20063	1.20063	1.20063
25880707	-0.845151	0.693373	0.410674	0.534456	2.44263	0.451374	0.693808	0.923426	0.838685	1.59208	25880707	Anti-EBV	1.20063	5.88711e-05	1.20063	1.20063	1.20063
6419781	-0.845151	0.693373	0.410674	0.534456	2.44263	0.451374	0.693808	0.923426	0.838685	-0.77219	6419781	Anti-EBV	63.0081	0.0074333	63.0081	63.0081	63.0081
5273750	-0.844524	0.784578	0.415913	0.259831	-0.411828	0.076077	0.111128	0.0504088	0.685031	-0.336902	5273750	Hydrogel	0.951961	2.92014e-05	0.951961	0.951961	0.951961
492407	-0.841378	0.263959	0.328444	0.0359998	0.396446	0.01398	0.207986	0.89539	0.795447	-0.768469	492407	Anti-EBV	23.2987	0.00269545	23.2987	23.2987	23.2987
506144	-0.840196	0.755253	0.377241	0.29202	-0.385134	0.179846	0.397957	0.414915	0.789002	-0.768469	506144	Anti-EBV	8.26362	0.000901576	8.26362	8.26362	8.26362
453994	-0.840193	0.952472	0.467325	0.206363	1.17288	0.22857	0.280558	0.862695	0.564274	-0.571187	453994	Anti-EBV	9.87551	0.00109389	9.87551	9.87551	9.87551
355900	-0.840193	0.952472	0.467325	0.206363	1.17288	0.22857	0.280558	0.862695	0.564274	-0.175381	355900	Anti-EBV	3.57511	0.000342177	3.57511	3.57511	3.57511
135625267	-0.840085	0.839858	0.386584	0.153655	-0.384232	0.215503	0.197115	0.273828	0.616078	-0.614503	135625267	Anti-EBV	2.15058	0.000172212	2.15058	2.15058	2.15058
7116198	-0.839706	0.450451	0.42918	0.040261	0.527759	0.168442	0.628425	0.370369	0.874235	0.765729	7116198	Hydrogel	0.953203	2.93495e-05	0.953203	0.953203	0.953203
6561296	-0.839706	0.450451	0.42918	0.040261	0.527759	0.168442	0.628425	0.370369	0.874235	-0.367683	6561296	Anti-EBV	3.38981	0.000320068	3.38981	3.38981	3.38981
7075199	-0.839706	0.450451	0.42918	0.040261	0.527759	0.168442	0.628425	0.370369	0.874235	-0.367683	7075199	Anti-EBV	3.38981	0.000320068	3.38981	3.38981	3.38981
453689	-0.838944	0.466476	0.348539	0.127534	-0.0850465	0.131613	0.376531	0.694528	0.403745	-0.367683	453689	Anti-EBV	1.55523	0.000101179	1.55523	1.55523	1.55523
71374940	-0.838445	0.560718	0.35061	0.0718263	0.166907	0.0538303	0.141582	0.10168	0.461672	-0.120473	71374940	Anti-EBV	1.27314	6.75224e-05	1.27314	1.27314	1.27314
14367015	-0.837256	0.776361	0.312759	0.117928	0.466738	0.037398	0.138741	0.0117869	0.494888	0.879574	14367015	Hydrogel	1.15482	5.34055e-05	1.15482	1.15482	1.15482
14367014	-0.837256	0.776361	0.312759		0.466738	0.037398	0.138741	0.0117869	0.494888	0.879574	14367014	Hydrogel	1.15482	5.34055e-05	1.15482	1.15482	1.15482
11043123	-0.836974	0.227435	0.334468	0.0496313	-0.275813	0.0977587	0.390722	0.694479	0.648962	0.879574	11043123	Hydrogel	3.61877	0.000347386	3.61877	3.61877	3.61877
46876980	-0.836974	0.227435	0.334468	0.0496313	-0.275813	0.0977587	0.390722	0.694479	0.648962	0.879574	46876980	Hydrogel	3.61877	0.000347386	3.61877	3.61877	3.61877
464378	-0.836447	0.112873	0.399686	0.418751	-0.211368	0.488731	0.313862	0.804646	0.64445	0.252206	464378	Hydrogel	1.75589	0.00012512	1.75589	1.75589	1.75589
510998	-0.834939	0.586207	0.401012	0.184097	-0.509994	0.0802047	0.0799751	0.0399514	0.417728	0.252206	510998	Hydrogel	4.02415	0.000395753	4.02415	4.02415	4.02415
6481831	-0.830806	0.34905	0.349996	0.219163	-0.58628	0.069893	0.12635	0.052624	0.612444	0.594713	6481831	Hydrogel	7.53693	0.000814872	7.53693	7.53693	7.53693
97454	-0.828205	0.260426	0.378241	0.290318	-1.18144	0.341483	0.403405	0.373511	0.685353	-0.570405	97454	Hydrogel	1.73917	0.000123126	1.73917	1.73917	1.73917
16747775	-0.826856	0.425325	0.328173	0.0728473	-0.47112	0.0301424	0.0909852	0.053695	0.646032	-1.09765	16747775	Anti-EBV	2.56478	0.000221632	2.56478	2.56478	2.56478
10778285	-0.822399	0.255711	0.386162	0.372177	0.747805	0.0517979	0.111789	0.0996254	0.476219	-0.114139	10778285	Anti-EBV	2.42814	0.000205329	2.42814	2.42814	2.42814
132073959	-0.822399	0.255711	0.386162	0.372177	0.747805	0.0517979	0.111789	0.0996254	0.476219	-0.88996	132073959	Anti-EBV	33.5684	0.00392076	33.5684	33.5684	33.5684
89998825	-0.822399	0.255711	0.386162	0.372177	0.747805	0.0517979	0.111789	0.0996254	0.476219	-0.88996	89998825	Anti-EBV	33.5684	0.00392076	33.5684	33.5684	33.5684
455669	-0.821779	0.471429	0.386937	0.0616858	-0.933317	0.0109075	0.526034	0.203287	0.683277	-0.38989	455669	Hydrogel	6.18237	0.000653256	6.18237	6.18237	6.18237
121487082	-0.819844	0.317064	0.441858	0.0832155	0.225829	0.0278411	0.0452494	0.0319888	0.427954	-0.934913	121487082	Anti-EBV	13.5568	0.00153312	13.5568	13.5568	13.5568
121487083	-0.819844	0.317064	0.441858	0.0832155	0.225829	0.0278411	0.0452494	0.0319888	0.427954	-0.934913	121487083	Anti-EBV	13.5568	0.00153312	13.5568	13.5568	13.5568
92268298	-0.818251	0.547293	0.380554	0.0983339	0.189628	0.148438	0.127893	0.0771593	0.597485	-0.934913	92268298	Anti-EBV	12.9234	0.00145754	12.9234	12.9234	12.9234
92228261	-0.818051	0.285324	0.388229	0.0667557	-0.526131	0.103048	0.178395	0.645817	0.616747	-0.934913	92228261	Anti-EBV	4.2393	0.000421422	4.2393	4.2393	4.2393
44451143	-0.818051	0.285324	0.388229	0.0667557	-0.526131	0.103048	0.178395	0.645817	0.616747	-0.395224	44451143	Hydrogel	1.34122	7.5645e-05	1.34122	1.34122	1.34122
97235	-0.81753	0.444174	0.421066	0.0864417	-1.1813	0.13123	0.578457	0.485926	0.801731	-0.781784	97235	Hydrogel	0.846044	1.6564e-05	0.846044	0.846044	0.846044
92244157	-0.81753	0.444174	0.421066	0.0864417	-1.1813	0.13123	0.578457	0.485926	0.801731	-0.687306	92244157	Hydrogel	1.21333	6.03863e-05	1.21333	1.21333	1.21333
10833407	-0.816509	0.86312	0.42671	0.313968	1.65333	0.523074	0.69081	0.880097	0.754392	0.311726	10833407	Anti-EBV	2.38874	0.000200627	2.38874	2.38874	2.38874
97199	-0.816488	0.431265	0.4048	0.0437913	-0.680919	0.0543245	0.543131	0.747043	0.809575	0.311726	97199	Hydrogel	11.0609	0.00123533	11.0609	11.0609	11.0609
512131	-0.816488	0.431265	0.4048	0.0437913	-0.680919	0.0543245	0.543131	0.747043	0.809575	1.0561	512131	Hydrogel	18.8252	0.00216171	18.8252	18.8252	18.8252
446940	-0.816006	0.702594	0.435205	0.463331	1.95538	0.608494	0.709271	0.888431	0.841615	0.715595	446940	Anti-EBV	1.85185	0.00013657	1.85185	1.85185	1.85185
5272744	-0.814712	0.255524	0.364154	0.152668	-0.289281	0.0203697	0.150506	0.0510898	0.451489	0.715595	5272744	Hydrogel	3.41167	0.000322676	3.41167	3.41167	3.41167
447069	-0.814276	0.141243	0.34295	0.022418	1.27251	0.230752	0.189464	0.224213	0.873161	0.715595	447069	Anti-EBV	1.22191	6.141e-05	1.22191	1.22191	1.22191
3011904	-0.813921	0.126501	0.404586	0.224815	-0.169127	0.519649	0.374665	0.248884	0.604469	-0.663648	3011904	Anti-EBV	5.36053	0.0005552	5.36053	5.36053	5.36053
71487589	-0.812901	0.118616	0.411006	0.299836	-0.994396	0.356856	0.47036	0.529362	0.770328	0.387386	71487589	Hydrogel	10.059	0.00111579	10.059	10.059	10.059
136250325	-0.810977	0.833827	0.404869	0.363034	0.341655	0.193856	0.12486	0.615106	0.604511	0.765893	136250325	Hydrogel	1.22761	6.20895e-05	1.22761	1.22761	1.22761
71371890	-0.810953	0.602115	0.419395	0.110163	0.0646943	0.0921362	0.375862	0.713031	0.754276	0.765893	71371890	Hydrogel	1.83955	0.000135102	1.83955	1.83955	1.83955
131844007	-0.810135	0.564593	0.431279	0.0501198	-1.38284	0.256635	0.493283	0.0497717	0.522663	-1.2741	131844007	Nontox	6.74011	0.000719802	6.74011	6.74011	6.74011
98911	-0.810122	0.289073	0.405362	0.0966621	0.52106	0.0874843	0.0627859	0.00990608	0.546512	-1.2741	98911	Anti-EBV	4.76446	0.000484081	4.76446	4.76446	4.76446
135959544	-0.808852	0.584973	0.364384	0.0631288	0.423244	0.0952829	0.146695	0.137349	0.547921	-1.51514	135959544	Anti-EBV	3.17409	0.000294329	3.17409	3.17409	3.17409
131875799	-0.806974	0.65286	0.383339	0.104638	0.109979	0.0686125	0.134749	0.197758	0.629123	-0.704492	131875799	Anti-EBV	11.9449	0.0013408	11.9449	11.9449	11.9449
688364	-0.805998	0.431113	0.369576	0.126776	-0.419038	0.0724277	0.0450933	0.0120994	0.490502	0.386921	688364	Hydrogel	3.65249	0.000351409	3.65249	3.65249	3.65249
111081	-0.805998	0.431113	0.369576	0.126776	-0.419038	0.0724277	0.0450933	0.0120994	0.490502	-0.691501	111081	Anti-EBV	4.07195	0.000401456	4.07195	4.07195	4.07195
482510	-0.805753	0.658132	0.377222	0.170968	-0.449447	0.175099	0.706787	0.475577	0.801235	0.943773	482510	Hydrogel	6.23667	0.000659735	6.23667	6.23667	6.23667
129893514	-0.804166	0.700202	0.404763	0.308261	-0.0500597	0.670189	0.382972	0.458077	0.675677	-0.288522	129893514	Anti-EBV	1.36108	7.80146e-05	1.36108	1.36108	1.36108
121486926	-0.802115	0.226081	0.406778	0.142736	1.6233	0.453066	0.698523	0.787537	0.698346	-0.288522	121486926	Anti-EBV	5.97128	0.00062807	5.97128	5.97128	5.97128
470797	-0.799937	0.87944	0.407429	0.0586255	0.10835	0.190365	0.424233	0.429763	0.749751	-0.288522	470797	Anti-EBV	1.80453	0.000130923	1.80453	1.80453	1.80453
391259	-0.799937	0.87944	0.407429	0.0586255	0.10835	0.190365	0.424233	0.429763	0.749751	-0.161742	391259	Anti-EBV	1.30559	7.13937e-05	1.30559	1.30559	1.30559
10848780	-0.799912	0.794888	0.417038	0.177051	0.743919	0.0116621	0.0453964	0.0271182	0.398604	-0.371218	10848780	Anti-EBV	4.38568	0.000438888	4.38568	4.38568	4.38568
72195	-0.799082	0.397149	0.348412	0.202283	-0.837312	0.521264	0.348802	0.741889	0.359979	0.0374025	72195	Hydrogel	31.6391	0.00369057	31.6391	31.6391	31.6391
22027846	-0.799082	0.397149	0.348412	0.202283	-0.837312	0.521264	0.348802	0.741889	0.359979	0.0374025	22027846	Hydrogel	31.6391	0.00369057	31.6391	31.6391	31.6391
510970	-0.798699	0.38434	0.364892	0.120911	0.82006	0.0277362	0.0832223	0.0140264	0.40453	1.32544	510970	Hydrogel	1.14862	5.2665e-05	1.14862	1.14862	1.14862
501518	-0.79775	0.188859	0.35995	0.0320646	-0.917104	0.194883	0.771344	0.632089	0.807654	-1.81042	501518	Nontox	0.896043	2.25297e-05	0.896043	0.896043	0.896043
512706	-0.796949	0.556805	0.394335	0.10958	-0.863531	0.0927564	0.405093	0.409772	0.761389	-1.81042	512706	Nontox	0.806538	1.18506e-05	0.806538	0.806538	0.806538
22899187	-0.793668	0.694834	0.431176	0.108802	-0.416759	0.0682132	0.12068	0.0242648	0.61567	-0.759442	22899187	Anti-EBV	14.8604	0.00168866	14.8604	14.8604	14.8604
135771870	-0.7928	0.931024	0.375978	0.166783	0.809824	0.153022	0.108699	0.476985	0.55031	-0.759442	135771870	Anti-EBV	67.206	0.00793415	67.206	67.206	67.206
11779374	-0.79271	0.285998	0.364646	0.0274901	-1.20409	0.0788309	0.259634	0.70632	0.791395	-1.07429	11779374	Nontox	3.77456	0.000365974	3.77456	3.77456	3.77456
21140827	-0.790324	0.309409	0.433674	0.215933	0.804763	0.716028	0.827275	0.811334	0.804386	-0.773967	21140827	Anti-EBV	137.089	0.016272	137.089	137.089	137.089
91926387	-0.788825	0.946847	0.416054	0.179009	0.141525	0.374648	0.483097	0.836207	0.593934	-0.773967	91926387	Anti-EBV	87.7673	0.0103874	87.7673	87.7673	87.7673
14999717	-0.788343	0.334694	0.452776	0.486612	0.550794	0.162192	0.253381	0.876598	0.477988	-1.0602	14999717	Anti-EBV	7.67305	0.000831113	7.67305	7.67305	7.67305
92249436	-0.787666	0.586246	0.444905	0.0981252	-1.88489	0.0494462	0.494032	0.152921	0.546096	1.01476	92249436	Hydrogel	3.03022	0.000277165	3.03022	3.03022	3.03022
15613706	-0.787666	0.586246	0.444905	0.0981252	-1.88489	0.0494462	0.494032	0.152921	0.546096	-0.382885	15613706	Hydrogel	1.22881	6.22334e-05	1.22881	1.22881	1.22881
9878327	-0.785668	0.62979	0.389707	0.126405	-0.0294814	0.00797706	0.0632199	0.0317256	0.373426	-2.49946	9878327	Anti-EBV	1.3311	7.44372e-05	1.3311	1.3311	1.3311
5272743	-0.783608	0.31365	0.35572	0.131617	0.612896	0.358224	0.202781	0.0787154	0.565103	-4.30817	5272743	Anti-EBV	1.26744	6.68423e-05	1.26744	1.26744	1.26744
131883949	-0.783471	0.292998	0.398969	0.175422	0.0783872	0.230168	0.556672	0.538939	0.800106	-0.0389577	131883949	Anti-EBV	0.929987	2.65796e-05	0.929987	0.929987	0.929987
131858038	-0.783471	0.292998	0.398969	0.175422	0.0783872	0.230168	0.556672	0.538939	0.800106	0.154442	131858038	Hydrogel	0.83189	1.48753e-05	0.83189	0.83189	0.83189
92266557	-0.783471	0.292998	0.398969	0.175422	0.0783872	0.230168	0.556672	0.538939	0.800106	-0.829865	92266557	Anti-EBV	26.9707	0.00313357	26.9707	26.9707	26.9707
228966	-0.782544	0.13908	0.330842	0.0214376	-1.36356	0.850675	0.394145	0.782774	0.596263	1.06945	228966	Hydrogel	5.21477	0.000537809	5.21477	5.21477	5.21477
124301793	-0.782544	0.13908	0.330842	0.0214376	-1.36356	0.850675	0.394145	0.782774	0.596263	0.81168	124301793	Hydrogel	4.58738	0.000462953	4.58738	4.58738	4.58738
13108042	-0.781478	0.551973	0.342168	0.0955181	-0.92206	0.195815	0.2333	0.904527	0.55498	0.477516	13108042	Hydrogel	13.3708	0.00151093	13.3708	13.3708	13.3708
5272210	-0.781449	0.31132	0.444527	0.150989	-0.212072	0.0112462	0.256093	0.601847	0.552092	1.64361	5272210	Hydrogel	5.3161	0.000549899	5.3161	5.3161	5.3161
25030767	-0.781311	0.149457	0.375599	0.106848	0.27882	0.049642	0.371962	0.552554	0.768854	1.64361	25030767	Hydrogel	2.5277	0.000217208	2.5277	2.5277	2.5277
446658	-0.78063	0.762126	0.436608	0.0457626	0.141702	0.179571	0.474811	0.409789	0.832556	-0.52345	446658	Anti-EBV	4.36448	0.000436358	4.36448	4.36448	4.36448
59180612	-0.779404	0.0923191	0.332885	0.0679299	0.448567	0.159983	0.18789	0.0115335	0.473239	0.113312	59180612	Anti-EBV	1.23819	6.3352e-05	1.23819	1.23819	1.23819
76974600	-0.778856	0.298616	0.374491	0.0778894	1.24679	0.0444432	0.15691	0.0231587	0.437219	0.0718339	76974600	Anti-EBV	2.66035	0.000233035	2.66035	2.66035	2.66035
136236455	-0.777904	0.901849	0.394356	0.304951	0.531889	0.184705	0.103736	0.911381	0.615336	-1.09697	136236455	Anti-EBV	6.51222	0.000692612	6.51222	6.51222	6.51222
71539360	-0.776481	0.402595	0.393454	0.0446796	-0.00996469	0.590695	0.299597	0.362686	0.651341	-1.09697	71539360	Anti-EBV	4.08927	0.000403522	4.08927	4.08927	4.08927
130209	-0.772468	0.629022	0.431331	0.0792576	1.19264	0.0958914	0.575499	0.477467	0.671524	1.18064	130209	Anti-EBV	0.715793	1.02352e-06	0.715793	0.715793	0.715793
472633	-0.771046	0.01575	0.322902	0.0257184	-0.845494	0.369805	0.715626	0.398155	0.752858	-1.22997	472633	Nontox	0.98091	3.26553e-05	0.98091	0.98091	0.98091
122130429	-0.769535	0.499488	0.38142	0.0718947	0.391405	0.0936406	0.213418	0.176818	0.596948	-1.22997	122130429	Anti-EBV	4.27278	0.000425418	4.27278	4.27278	4.27278
15119214	-0.76827	0.303872	0.411233	0.210143	1.29692	0.100437	0.352633	0.859348	0.708779	-0.507383	15119214	Anti-EBV	10.4873	0.00116688	10.4873	10.4873	10.4873
10612861	-0.767934	0.825126	0.436375	0.162786	-0.290572	0.0364471	0.0713995	0.403863	0.442917	-2.0152	10612861	Anti-EBV	1.24835	6.45643e-05	1.24835	1.24835	1.24835
189108	-0.76768	0.354477	0.356463	0.110359	0.000283928	0.0991887	0.094978	0.0393697	0.55479	-0.358532	189108	Anti-EBV	1.94728	0.000147955	1.94728	1.94728	1.94728
162660830	-0.767268	0.718495	0.39242	0.287711	-0.0619088	0.0863782	0.634323	0.6666	0.837867	0.778403	162660830	Hydrogel	2.39184	0.000200998	2.39184	2.39184	2.39184
6560416	-0.767207	0.311734	0.39908	0.123508	0.572788	0.0603179	0.255871	0.198741	0.831181	0.956493	6560416	Hydrogel	1.11205	4.83023e-05	1.11205	1.11205	1.11205
490438	-0.767166	0.239302	0.33317	0.0218872	-0.867345	0.0452399	0.431909	0.338454	0.783446	-1.06654	490438	Nontox	1.41824	8.48348e-05	1.41824	1.41824	1.41824
91483617	-0.762699	0.522249	0.401775	0.233815	-0.283262	0.502025	0.514296	0.619016	0.708538	-0.588838	91483617	Anti-EBV	3.19245	0.000296521	3.19245	3.19245	3.19245
57173805	-0.761196	0.61179	0.36934	0.0775834	0.154066	0.0365008	0.140067	0.0539793	0.464585	-1.02333	57173805	Anti-EBV	5.64455	0.000589087	5.64455	5.64455	5.64455
146674828	-0.759125	0.43519	0.403597	0.138793	0.186893	0.0332182	0.229317	0.535988	0.537241	-0.290043	146674828	Anti-EBV	2.14493	0.000171538	2.14493	2.14493	2.14493
44567065	-0.758007	0.274204	0.388691	0.120392	-0.16163	0.358043	0.200346	0.137769	0.512424	-0.947932	44567065	Anti-EBV	5.14744	0.000529775	5.14744	5.14744	5.14744
121487118	-0.756134	0.911757	0.473785		1.15858	0.0587488	0.227283	0.0849397	0.553272	-0.947932	121487118	Anti-EBV	14.8241	0.00168432	14.8241	14.8241	14.8241
54683691	-0.755982	0.768743	0.48532	0.125857	0.353939	0.0395152	0.124177	0.0672882	0.588062	0.123714	54683691	Anti-EBV	1.0772	4.41443e-05	1.0772	1.0772	1.0772
124526965	-0.755564	0.528942	0.37716		0.0570097	0.0436201	0.0874888	0.0234842	0.378926	-0.36653	124526965	Anti-EBV	2.24667	0.000183677	2.24667	2.24667	2.24667
57453626	-0.755564	0.528942	0.37716	0.305782	0.0570097	0.0436201	0.0874888	0.0234842	0.378926	-1.28085	57453626	Anti-EBV	2.89472	0.000260997	2.89472	2.89472	2.89472
118703664	-0.755564	0.528942	0.37716	0.305782	0.0570097	0.0436201	0.0874888	0.0234842	0.378926	-1.28085	118703664	Anti-EBV	2.89472	0.000260997	2.89472	2.89472	2.89472
58455422	-0.755564	0.528942	0.37716	0.305782	0.0570097	0.0436201	0.0874888	0.0234842	0.378926	-1.28085	58455422	Anti-EBV	2.89472	0.000260997	2.89472	2.89472	2.89472
11311503	-0.755564	0.528942	0.37716	0.305782	0.0570097	0.0436201	0.0874888	0.0234842	0.378926	-1.92106	11311503	Anti-EBV	1.69306	0.000117624	1.69306	1.69306	1.69306
118703665	-0.755564	0.528942	0.37716	0.305782	0.0570097	0.0436201	0.0874888	0.0234842	0.378926	-1.92106	118703665	Anti-EBV	1.69306	0.000117624	1.69306	1.69306	1.69306
146014346	-0.755564	0.528942	0.37716		0.0570097	0.0436201	0.0874888	0.0234842	0.378926	-0.526547	146014346	Anti-EBV	4.31037	0.000429903	4.31037	4.31037	4.31037
122220071	-0.754982	0.178727	0.346416	0.0443324	0.445094	0.0553369	0.119812	0.0343581	0.450763	-0.956217	122220071	Anti-EBV	9.14018	0.00100616	9.14018	9.14018	9.14018
129437559	-0.754875	0.530134	0.439632	0.105779	-0.0524581	0.242389	0.303599	0.505584	0.554506	-0.734152	129437559	Anti-EBV	47.1964	0.00554675	47.1964	47.1964	47.1964
22880800	-0.754373	0.571377	0.410392	0.294292	0.548146	0.229444	0.322289	0.837815	0.707911	-0.0314192	22880800	Anti-EBV	1.84079	0.00013525	1.84079	1.84079	1.84079
478563	-0.754304	0.783856	0.416232	0.0250413	-0.569241	0.0560545	0.278541	0.520778	0.671094	-0.412716	478563	Hydrogel	1.9031	0.000142684	1.9031	1.9031	1.9031
470030	-0.75374	0.818263	0.410499	0.399526	2.91676	0.231982	0.655004	0.75418	0.822946	-1.08397	470030	Anti-EBV	16.4255	0.00187539	16.4255	16.4255	16.4255
483941	-0.753015	0.946994	0.402485		1.05697	0.0448811	0.132209	0.47067	0.501085	-0.515999	483941	Anti-EBV	10.092	0.00111973	10.092	10.092	10.092
5287841	-0.752269	0.355671	0.404346	0.087191	-0.371237	0.278398	0.174931	0.035644	0.459141	0.425053	5287841	Hydrogel	3.66243	0.000352595	3.66243	3.66243	3.66243
21787858	-0.752033	0.598008	0.413477	0.0569274	-0.336278	0.0261871	0.572863	0.295943	0.642007	0.239645	21787858	Hydrogel	2.66605	0.000233714	2.66605	2.66605	2.66605
3005951	-0.751679	0.316966	0.323048	0.168688	0.192128	0.219459	0.133	0.0273684	0.466647	-0.838539	3005951	Anti-EBV	16.071	0.00183309	16.071	16.071	16.071
482632	-0.750656	0.44874	0.412786	0.210904	1.13525	0.776362	0.60747	0.796467	0.824783	1.0121	482632	Anti-EBV	0.805903	1.17748e-05	0.805903	0.805903	0.805903
466400	-0.750178	0.231467	0.367325	0.0141445	-1.38034	0.969875	0.670377	0.442546	0.690329	-2.54405	466400	Nontox	1.4729	9.13566e-05	1.4729	1.4729	1.4729
3010388	-0.74967	0.848442	0.414226	0.438884	2.54262	0.583575	0.693893	0.917426	0.831735	-0.0750978	3010388	Anti-EBV	6.19492	0.000654754	6.19492	6.19492	6.19492
46875339	-0.74967	0.848442	0.414226	0.438884	2.54262	0.583575	0.693893	0.917426	0.831735	0.58777	46875339	Anti-EBV	2.77414	0.000246611	2.77414	2.77414	2.77414
92246571	-0.74967	0.848442	0.414226	0.438884	2.54262	0.583575	0.693893	0.917426	0.831735	-0.821058	92246571	Anti-EBV	65.9151	0.00778013	65.9151	65.9151	65.9151
134229912	-0.74782	0.346586	0.404097	0.349141	-0.0587406	0.332763	0.623532	0.853939	0.780451	0.619818	134229912	Hydrogel	2.09968	0.000166139	2.09968	2.09968	2.09968
135848702	-0.746683	0.330474	0.326369	0.0458965	-1.08524	0.0116213	0.150652	0.273171	0.559886	-0.735477	135848702	Hydrogel	0.753885	5.56831e-06	0.753885	0.753885	0.753885
123993511	-0.746387	0.390236	0.5287	0.0959847	-0.240805	0.0130733	0.044387	0.0190818	0.421877	0.525464	123993511	Hydrogel	2.85043	0.000255713	2.85043	2.85043	2.85043
512136	-0.744877	0.838449	0.441609	0.195256	0.110552	0.127245	0.58317	0.704801	0.831967	-1.2765	512136	Anti-EBV	2.98264	0.000271487	2.98264	2.98264	2.98264
447192	-0.744697	0.337644	0.408559	0.0722094	-0.893084	0.0609654	0.182868	0.055269	0.4626	-1.07884	447192	Nontox	1.83668	0.00013476	1.83668	1.83668	1.83668
98575509	-0.740694	0.315459	0.35746	0.0829269	-0.184436	0.0164334	0.068959	0.0195215	0.496876	0.985564	98575509	Hydrogel	3.68159	0.00035488	3.68159	3.68159	3.68159
40493564	-0.740694	0.315459	0.35746	0.0829269	-0.184436	0.0164334	0.068959	0.0195215	0.496876	0.981248	40493564	Hydrogel	3.67061	0.000353571	3.67061	3.67061	3.67061
453168	-0.740571	0.739288	0.315731	0.0853794	-0.593455	0.550574	0.182935	0.394038	0.602067	-0.913944	453168	Anti-EBV	1.90699	0.000143148	1.90699	1.90699	1.90699
139267848	-0.74	0.222935	0.372238	0.140467	0.0860539	0.0288829	0.053304	0.0241054	0.535571	0.718626	139267848	Hydrogel	1.79005	0.000129196	1.79005	1.79005	1.79005
139591931	-0.74	0.222752	0.37213	0.144497	0.126601	0.0299195	0.0526606	0.0240135	0.535537	0.616119	139591931	Hydrogel	1.50593	9.52972e-05	1.50593	1.50593	1.50593
139267847	-0.74	0.222935	0.372238	0.140467	0.0860539	0.0288829	0.053304	0.0241054	0.535571	-1.12181	139267847	Anti-EBV	3.76661	0.000365025	3.76661	3.76661	3.76661
139267828	-0.74	0.222752	0.37213	0.144497	0.126601	0.0299195	0.0526606	0.0240135	0.535537	-1.12181	139267828	Anti-EBV	3.91679	0.000382943	3.91679	3.91679	3.91679
135692739	-0.738901	0.802109	0.422273	0.149916	-0.703627	0.0607835	0.295642	0.1646	0.667949	-1.12181	135692739	Anti-EBV	0.837353	1.55272e-05	0.837353	0.837353	0.837353
14162717	-0.736791	0.408347	0.352615	0.122821	-0.661246	0.0169793	0.224647	0.6987	0.802862	-1.12181	14162717	Anti-EBV	0.984554	3.30901e-05	0.984554	0.984554	0.984554
147839	-0.736791	0.408347	0.352615	0.122821	-0.661246	0.0169793	0.224647	0.6987	0.802862	-1.12181	147839	Anti-EBV	0.984554	3.30901e-05	0.984554	0.984554	0.984554
3032355	-0.736372	0.7406	0.366777	0.30412	0.0793233	0.426187	0.220332	0.516008	0.535308	-1.12181	3032355	Anti-EBV	3.69982	0.000357056	3.69982	3.69982	3.69982
3000603	-0.736372	0.7406	0.366777	0.30412	0.0793233	0.426187	0.220332	0.516008	0.535308	-1.12181	3000603	Anti-EBV	3.69982	0.000357056	3.69982	3.69982	3.69982
10334791	-0.735775	0.617057	0.384365	0.240265	-0.802226	0.0439253	0.339941	0.660914	0.513502	0.953645	10334791	Hydrogel	36.6536	0.00428886	36.6536	36.6536	36.6536
71732376	-0.733102	0.265113	0.378505	0.0193839	-0.303907	0.0390544	0.216822	0.0464606	0.46772	-0.13973	71732376	Hydrogel	1.24804	6.4527e-05	1.24804	1.24804	1.24804
135410340	-0.731448	0.823527	0.336483	0.0357562	-0.458303	0.121151	0.141569	0.345212	0.642574	0.485507	135410340	Hydrogel	5.5934	0.000582985	5.5934	5.5934	5.5934
135740163	-0.731448	0.823527	0.336483	0.0357562	-0.458303	0.121151	0.141569	0.345212	0.642574	-0.0603752	135740163	Hydrogel	2.76724	0.000245787	2.76724	2.76724	2.76724
135453973	-0.731448	0.823527	0.336483		-0.458303	0.121151	0.141569	0.345212	0.642574	-0.48286	135453973	Anti-EBV	0.846766	1.66502e-05	0.846766	0.846766	0.846766
150621	-0.731119	0.593841	0.36558	0.189464	-0.0971814	0.0300651	0.0785016	0.0576963	0.406054	0.812231	150621	Hydrogel	2.7358	0.000242036	2.7358	2.7358	2.7358
3037046	-0.729255	0.637103	0.398581	0.0954426	0.742869	0.349284	0.256891	0.473409	0.598323	-1.74268	3037046	Anti-EBV	2.76138	0.000245088	2.76138	2.76138	2.76138
3002879	-0.728705	0.575354	0.370686	0.339985	0.0201383	0.486859	0.64058	0.409022	0.792183	-0.00346765	3002879	Anti-EBV	0.753124	5.47751e-06	0.753124	0.753124	0.753124
67228673	-0.728536	0.124954	0.406165	0.0403922	-0.802888	0.0540862	0.462276	0.594977	0.657655	0.377818	67228673	Hydrogel	21.7464	0.00251025	21.7464	21.7464	21.7464
22723869	-0.728536	0.124954	0.406165	0.0403922	-0.802888	0.0540862	0.462276	0.594977	0.657655	0.50317	22723869	Hydrogel	24.1302	0.00279467	24.1302	24.1302	24.1302
171555	-0.727942	0.381784	0.402145	0.0863885	0.0585685	0.229403	0.394151	0.62575	0.784772	-2.11347	171555	Anti-EBV	1.50989	9.57691e-05	1.50989	1.50989	1.50989
54531450	-0.727672	0.454482	0.312294	0.202638	0.754434	0.0451746	0.116269	0.0351208	0.346887	-1.21193	54531450	Anti-EBV	5.03525	0.00051639	5.03525	5.03525	5.03525
23112639	-0.727672	0.454482	0.312294	0.202638	0.754434	0.0451746	0.116269	0.0351208	0.346887	-1.21193	23112639	Anti-EBV	5.03525	0.00051639	5.03525	5.03525	5.03525
53678903	-0.726509	0.398272	0.404649	0.203201	-0.819687	0.364794	0.379334	0.632565	0.708206	-1.21193	53678903	Nontox	1.04302	4.00654e-05	1.04302	1.04302	1.04302
513206	-0.724457	0.12084	0.376913	0.00998603	-1.49513	0.946781	0.560025	0.514435	0.637075	-0.643378	513206	Hydrogel	0.855875	1.7737e-05	0.855875	0.855875	0.855875
137221145	-0.723282	0.660634	0.432754	0.118546	0.171484	0.0369312	0.120612	0.0483614	0.733185	-0.490935	137221145	Anti-EBV	4.73874	0.000481013	4.73874	4.73874	4.73874
136842926	-0.723282	0.660634	0.432754	0.118546	0.171484	0.0369312	0.120612	0.0483614	0.733185	0.905574	136842926	Hydrogel	1.86734	0.000138417	1.86734	1.86734	1.86734
144823459	-0.722232	0.289238	0.410888	0.0938719	-0.372406	0.00529116	0.0621739	0.0288073	0.424391	0.273519	144823459	Hydrogel	3.31821	0.000311525	3.31821	3.31821	3.31821
10778362	-0.721834	0.425889	0.405821	0.141003	1.40524	0.0765962	0.0782021	0.054244	0.426337	0.447301	10778362	Anti-EBV	1.86583	0.000138238	1.86583	1.86583	1.86583
11196409	-0.721713	0.401495	0.400013	0.02585	-0.429786	0.0815666	0.483999	0.237373	0.661649	-1.51068	11196409	Anti-EBV	1.23036	6.24175e-05	1.23036	1.23036	1.23036
92236585	-0.720668	0.401871	0.383608	0.0731478	0.0851536	0.191837	0.278677	0.59153	0.64075	1.53995	92236585	Hydrogel	3.26022	0.000304606	3.26022	3.26022	3.26022
261450	-0.720668	0.401871	0.383608	0.0731478	0.0851536	0.191837	0.278677	0.59153	0.64075	1.53995	261450	Hydrogel	3.26022	0.000304606	3.26022	3.26022	3.26022
92236583	-0.720668	0.401871	0.383608	0.0731478	0.0851536	0.191837	0.278677	0.59153	0.64075	-0.562467	92236583	Anti-EBV	6.4958	0.000690652	6.4958	6.4958	6.4958
459890	-0.720668	0.401871	0.383608	0.0731478	0.0851536	0.191837	0.278677	0.59153	0.64075	-0.571432	459890	Anti-EBV	6.92846	0.000742274	6.92846	6.92846	6.92846
152488	-0.716041	0.781293	0.393351	0.393219	1.30975	0.609521	0.400728	0.582195	0.764	-0.571432	152488	Anti-EBV	19.1024	0.00219478	19.1024	19.1024	19.1024
324745	-0.713869	0.231819	0.429621		0.200764	0.021765	0.0392579	0.0593113	0.442703	-0.571432	324745	Anti-EBV	8.37316	0.000914645	8.37316	8.37316	8.37316
7204908	-0.711842	0.356869	0.37722	0.068885	0.224938	0.122236	0.477713	0.415059	0.627439	-0.571432	7204908	Anti-EBV	8.72725	0.000956893	8.72725	8.72725	8.72725
44629931	-0.711842	0.356869	0.37722	0.068885	0.224938	0.122236	0.477713	0.415059	0.627439	0.478856	44629931	Hydrogel	1.09042	4.57212e-05	1.09042	1.09042	1.09042
3010385	-0.711348	0.419862	0.414917	0.303172	0.339934	0.121934	0.374553	0.869428	0.734293	-0.432791	3010385	Anti-EBV	4.62994	0.000468032	4.62994	4.62994	4.62994
3007126	-0.711317	0.377785	0.320912	0.21051	-0.56538	0.0133668	0.0719042	0.0192656	0.656582	-0.432791	3007126	Hydrogel	1.99177	0.000153264	1.99177	1.99177	1.99177
25231310	-0.71083	0.225862	0.349792	0.0248835	-0.96416	0.100689	0.27587	0.666131	0.709607	0.139798	25231310	Hydrogel	5.45542	0.000566521	5.45542	5.45542	5.45542
10753744	-0.710363	0.753422	0.447622	0.131185	-0.558775	0.0199503	0.088495	0.0160217	0.626207	0.139798	10753744	Hydrogel	7.22366	0.000777496	7.22366	7.22366	7.22366
131882742	-0.707257	0.708301	0.40361	0.0465317	3.27669	0.296188	0.446713	0.746164	0.770769	-0.429666	131882742	Anti-EBV	19.5885	0.00225278	19.5885	19.5885	19.5885
495012	-0.707187	0.293776	0.375851	0.0479537	2.059	0.213714	0.267988	0.521334	0.774341	-1.00546	495012	Anti-EBV	13.8217	0.00156473	13.8217	13.8217	13.8217
11004885	-0.706858	0.253278	0.396199	0.0411385	2.02008	0.0440083	0.280729	0.833739	0.644579	0.528787	11004885	Anti-EBV	2.41388	0.000203627	2.41388	2.41388	2.41388
15742006	-0.706664	0.33368	0.368121	0.0434164	0.0466973	0.0315995	0.448932	0.908038	0.671689	0.528787	15742006	Hydrogel	1.61206	0.000107959	1.61206	1.61206	1.61206
369086	-0.706347	0.68313	0.359906	0.115113	-0.530996	0.0322202	0.125533	0.0248611	0.667602	0.528787	369086	Hydrogel	9.25359	0.00101969	9.25359	9.25359	9.25359
131072	-0.706347	0.68313	0.359906	0.115113	-0.530996	0.0322202	0.125533	0.0248611	0.667602	1.85557	131072	Hydrogel	19.9533	0.00229631	19.9533	19.9533	19.9533
10469019	-0.706184	0.586105	0.363908	0.2975	-0.506392	0.161023	0.259737	0.603761	0.60066	-0.348132	10469019	Hydrogel	1.82721	0.00013363	1.82721	1.82721	1.82721
66906535	-0.70537	0.105768	0.397065	0.358746	0.323522	0.0963555	0.58415	0.645087	0.83392	-0.1655	66906535	Anti-EBV	1.98807	0.000152822	1.98807	1.98807	1.98807
845540	-0.704794	0.642415	0.398616		0.081293	0.118411	0.539637	0.607039	0.833593	-1.45629	845540	Anti-EBV	2.18639	0.000176484	2.18639	2.18639	2.18639
11697484	-0.703791	0.381758	0.417506	0.268602	1.31064	0.332069	0.43321	0.75429	0.598771	-0.176573	11697484	Anti-EBV	4.6963	0.000475949	4.6963	4.6963	4.6963
10400520	-0.701852	0.242524	0.382812	0.143502	-0.315386	0.0507232	0.562368	0.409942	0.800707	-0.176573	10400520	Hydrogel	1.21503	6.05884e-05	1.21503	1.21503	1.21503
21854430	-0.699829	0.427898	0.447652	0.0737148	0.455714	0.309412	0.659161	0.650524	0.86625	-0.294771	21854430	Anti-EBV	3.32722	0.0003126	3.32722	3.32722	3.32722
506145	-0.699637	0.802842	0.460566	0.175801	2.1132	0.326262	0.732445	0.450183	0.551511	-0.411343	506145	Anti-EBV	13.0905	0.00147748	13.0905	13.0905	13.0905
12799571	-0.699549	0.870431	0.424701	0.0784784	1.17207	0.360171	0.210514	0.190599	0.779771	-0.411343	12799571	Anti-EBV	8.47642	0.000926966	8.47642	8.47642	8.47642
98801	-0.699507	0.571709	0.399903	0.327015	1.07122	0.496805	0.719343	0.832838	0.839298	-1.01879	98801	Anti-EBV	8.54996	0.00093574	8.54996	8.54996	8.54996
92230795	-0.699014	0.775055	0.41704	0.186257	1.62146	0.101674	0.671736	0.683195	0.83857	-2.40771	92230795	Anti-EBV	2.62763	0.000229131	2.62763	2.62763	2.62763
18661221	-0.699014	0.775055	0.41704	0.186257	1.62146	0.101674	0.671736	0.683195	0.83857	0.4022	18661221	Anti-EBV	2.27289	0.000186805	2.27289	2.27289	2.27289
69454489	-0.698969	0.288256	0.380294	0.169993	0.380299	0.12807	0.458903	0.45591	0.575989	0.4022	69454489	Hydrogel	0.735795	3.40997e-06	0.735795	0.735795	0.735795
71744251	-0.698969	0.288256	0.380294	0.169993	0.380299	0.12807	0.458903	0.45591	0.575989	-0.367719	71744251	Anti-EBV	3.90046	0.000380996	3.90046	3.90046	3.90046
11390847	-0.697242	0.473579	0.366241	0.241374	-0.681886	0.298334	0.0896524	0.0210471	0.486878	0.603921	11390847	Hydrogel	119.021	0.0141163	119.021	119.021	119.021
10264872	-0.697062	0.395902	0.394925	0.0575863	-0.507309	0.0615523	0.598259	0.317483	0.833827	-0.0115233	10264872	Hydrogel	4.40184	0.000440816	4.40184	4.40184	4.40184
53243689	-0.696091	0.346463	0.44937	0.0264511	-0.720448	0.175465	0.307167	0.764296	0.464147	-0.266922	53243689	Hydrogel	25.6112	0.00297137	25.6112	25.6112	25.6112
126968805	-0.695199	0.256044	0.378226	0.0966602	0.171589	0.0423874	0.0688902	0.029467	0.594206	0.141436	126968805	Anti-EBV	0.758063	6.0668e-06	0.758063	0.758063	0.758063
139024751	-0.695199	0.256044	0.378226	0.0966602	0.171589	0.0423874	0.0688902	0.029467	0.594206	0.141436	139024751	Anti-EBV	0.758063	6.0668e-06	0.758063	0.758063	0.758063
251784	-0.695199	0.256044	0.378226		0.171589	0.0423874	0.0688902	0.029467	0.594206	0.141436	251784	Anti-EBV	0.758063	6.0668e-06	0.758063	0.758063	0.758063
25728863	-0.695199	0.256044	0.378226	0.0966602	0.171589	0.0423874	0.0688902	0.029467	0.594206	0.141436	25728863	Anti-EBV	0.758063	6.0668e-06	0.758063	0.758063	0.758063
7272023	-0.695199	0.256044	0.378226	0.0966602	0.171589	0.0423874	0.0688902	0.029467	0.594206	-0.095735	7272023	Anti-EBV	1.33773	7.52281e-05	1.33773	1.33773	1.33773
11276944	-0.695199	0.256044	0.378226	0.0966602	0.171589	0.0423874	0.0688902	0.029467	0.594206	1.06647	11276944	Hydrogel	2.16712	0.000174186	2.16712	2.16712	2.16712
124428635	-0.693114	0.259669	0.361787	0.276583	-0.166729	0.608658	0.182249	0.0896889	0.570514	0.171621	124428635	Hydrogel	1.61609	0.000108441	1.61609	1.61609	1.61609
92918	-0.693114	0.259669	0.361787	0.276583	-0.166729	0.608658	0.182249	0.0896889	0.570514	0.171621	92918	Hydrogel	1.61609	0.000108441	1.61609	1.61609	1.61609
97000	-0.693114	0.259669	0.361787	0.276583	-0.166729	0.608658	0.182249	0.0896889	0.570514	-0.795976	97000	Anti-EBV	7.94306	0.000863329	7.94306	7.94306	7.94306
7282382	-0.693114	0.259669	0.361787	0.276583	-0.166729	0.608658	0.182249	0.0896889	0.570514	0.901793	7282382	Hydrogel	3.57776	0.000342493	3.57776	3.57776	3.57776
14135553	-0.693114	0.259669	0.361787	0.276583	-0.166729	0.608658	0.182249	0.0896889	0.570514	-1.19753	14135553	Anti-EBV	2.18286	0.000176063	2.18286	2.18286	2.18286
490445	-0.692056	0.274719	0.372665	0.0260118	-0.161751	0.430449	0.749393	0.433026	0.821084	0.0511178	490445	Hydrogel	1.27475	6.77141e-05	1.27475	1.27475	1.27475
102461643	-0.691271	0.475158	0.399904	0.0777765	0.0146196	0.0360849	0.0758397	0.0558996	0.437405	-1.38742	102461643	Anti-EBV	2.14107	0.000171078	2.14107	2.14107	2.14107
118294346	-0.690826	0.662409	0.420235	0.269245	0.913814	0.366915	0.185151	0.181272	0.632963	-1.13241	118294346	Anti-EBV	5.84595	0.000613117	5.84595	5.84595	5.84595
500026	-0.689602	0.641545	0.39021	0.107934	0.62814	0.0849887	0.464467	0.40205	0.704446	-1.77316	500026	Anti-EBV	2.42693	0.000205185	2.42693	2.42693	2.42693
101947567	-0.689324	0.435628	0.441712	0.197571	1.53965	0.609559	0.491637	0.778667	0.607064	-0.57273	101947567	Anti-EBV	26.3258	0.00305663	26.3258	26.3258	26.3258
21677361	-0.684755	0.804801	0.442558	0.342921	0.963137	0.00922717	0.293407	0.600606	0.658546	0.743441	21677361	Anti-EBV	0.924643	2.5942e-05	0.924643	0.924643	0.924643
452095	-0.684482	0.28518	0.361651	0.14767	-1.1903	0.154659	0.297656	0.743797	0.409984	0.743441	452095	Hydrogel	4.69932	0.000476309	4.69932	4.69932	4.69932
14430353	-0.684482	0.28518	0.361651	0.14767	-1.1903	0.154659	0.297656	0.743797	0.409984	-0.11525	14430353	Hydrogel	2.29856	0.000189868	2.29856	2.29856	2.29856
22875362	-0.684365	0.111217	0.395848	0.271705	0.608257	0.0236338	0.100753	0.0738716	0.545837	-0.920569	22875362	Anti-EBV	8.44589	0.000923323	8.44589	8.44589	8.44589
21852786	-0.682876	0.567466	0.428353	0.0423789	-0.14925	0.159424	0.0792108	0.045655	0.438376	-0.629054	21852786	Anti-EBV	13.3107	0.00150376	13.3107	13.3107	13.3107
11507479	-0.681616	0.679394	0.390425	0.150064	0.439632	0.222008	0.319985	0.244309	0.688836	-0.491876	11507479	Anti-EBV	7.64947	0.0008283	7.64947	7.64947	7.64947
3034423	-0.681616	0.679394	0.390425	0.150064	0.439632	0.222008	0.319985	0.244309	0.688836	-1.08704	3034423	Anti-EBV	4.61808	0.000466617	4.61808	4.61808	4.61808
6595185	-0.681616	0.679394	0.390425	0.150064	0.439632	0.222008	0.319985	0.244309	0.688836	0.230007	6595185	Anti-EBV	1.03228	3.8785e-05	1.03228	1.03228	1.03228
676166	-0.681616	0.679394	0.390425	0.150064	0.439632	0.222008	0.319985	0.244309	0.688836	-1.97353	676166	Anti-EBV	1.93448	0.000146428	1.93448	1.93448	1.93448
512674	-0.680993	0.77144	0.381533	0.146189	-0.352057	0.0133354	0.0596802	0.0576023	0.422817	0.254864	512674	Hydrogel	3.31633	0.000311301	3.31633	3.31633	3.31633
135509485	-0.680166	0.729649	0.381059	0.164261	0.00580855	0.0856026	0.195349	0.558132	0.595446	0.84454	135509485	Hydrogel	2.4362	0.00020629	2.4362	2.4362	2.4362
135511868	-0.680166	0.729649	0.381059	0.164261	0.00580855	0.0856026	0.195349	0.558132	0.595446	-0.620228	135511868	Anti-EBV	15.4747	0.00176195	15.4747	15.4747	15.4747
136257804	-0.680166	0.729649	0.381059	0.164261	0.00580855	0.0856026	0.195349	0.558132	0.595446	-0.620228	136257804	Anti-EBV	15.4747	0.00176195	15.4747	15.4747	15.4747
136843263	-0.680166	0.729649	0.381059	0.164261	0.00580855	0.0856026	0.195349	0.558132	0.595446	0.190416	136843263	Hydrogel	1.08767	4.53936e-05	1.08767	1.08767	1.08767
137090331	-0.680166	0.729649	0.381059	0.164261	0.00580855	0.0856026	0.195349	0.558132	0.595446	0.190416	137090331	Hydrogel	1.08767	4.53936e-05	1.08767	1.08767	1.08767
54256130	-0.678687	0.210313	0.403576	0.0494353	0.711915	0.169989	0.318675	0.623687	0.712742	-0.0853588	54256130	Anti-EBV	2.60737	0.000226713	2.60737	2.60737	2.60737
513870	-0.675988	0.20545	0.39371	0.0944436	0.443263	0.0567487	0.399926	0.550729	0.627756	-1.01527	513870	Anti-EBV	5.37217	0.000556589	5.37217	5.37217	5.37217
688121	-0.674467	0.330559	0.36906	0.0911326	-0.173323	0.021391	0.113054	0.057583	0.328555	1.67332	688121	Hydrogel	5.91813	0.000621729	5.91813	5.91813	5.91813
490037	-0.674467	0.330559	0.36906	0.0911326	-0.173323	0.021391	0.113054	0.057583	0.328555	1.67332	490037	Hydrogel	5.91813	0.000621729	5.91813	5.91813	5.91813
150628	-0.673732	0.163344	0.356588	0.0859128	0.56787	0.010993	0.0777143	0.0455903	0.359997	1.67332	150628	Hydrogel	1.96622	0.000150216	1.96622	1.96622	1.96622
92231363	-0.670495	0.657292	0.430124	0.16214	1.77421	0.210924	0.617626	0.680495	0.684585	1.67332	92231363	Anti-EBV	0.767974	7.24934e-06	0.767974	0.767974	0.767974
29921448	-0.670495	0.657292	0.430124	0.16214	1.77421	0.210924	0.617626	0.680495	0.684585	1.67332	29921448	Anti-EBV	0.767974	7.24934e-06	0.767974	0.767974	0.767974
15612863	-0.669433	0.416357	0.437273	0.0561906	-1.88961	0.329605	0.472389	0.105112	0.515753	-0.370736	15612863	Hydrogel	1.05329	4.12914e-05	1.05329	1.05329	1.05329
136896502	-0.666773	0.719097	0.411926	0.148791	-0.857588	0.0285382	0.210366	0.198259	0.694156	1.37533	136896502	Hydrogel	15.8408	0.00180564	15.8408	15.8408	15.8408
135453913	-0.666773	0.719097	0.411926	0.148791	-0.857588	0.0285382	0.210366	0.198259	0.694156	0.0464645	135453913	Hydrogel	5.99278	0.000630636	5.99278	5.99278	5.99278
10107866	-0.666495	0.346723	0.328627	0.161115	0.137542	0.331515	0.220763	0.583457	0.57117	-0.59734	10107866	Anti-EBV	15.7321	0.00179266	15.7321	15.7321	15.7321
21817403	-0.666216	0.414922	0.452399	0.0318463	-2.07527	0.0794393	0.290962	0.0439937	0.469581	-0.59734	21817403	Hydrogel	0.776228	8.23414e-06	0.776228	0.776228	0.776228
92252780	-0.664582	0.455314	0.390937	0.0862095	0.322158	0.0652781	0.287596	0.350627	0.817607	-0.59734	92252780	Anti-EBV	20.0413	0.00230681	20.0413	20.0413	20.0413
97692	-0.664582	0.455314	0.390937	0.0862095	0.322158	0.0652781	0.287596	0.350627	0.817607	-0.59734	97692	Anti-EBV	20.0413	0.00230681	20.0413	20.0413	20.0413
67113473	-0.662789	0.306382	0.376303	0.362692	0.134186	0.159845	0.129087	0.055	0.585493	-0.59734	67113473	Anti-EBV	16.5103	0.00188551	16.5103	16.5103	16.5103
21121840	-0.662143	0.291616	0.358889	0.267158	-0.278849	0.0279126	0.0945605	0.101902	0.487561	-1.23834	21121840	Anti-EBV	1.64782	0.000112227	1.64782	1.64782	1.64782
134004	-0.662143	0.291616	0.358889	0.267158	-0.278849	0.0279126	0.0945605	0.101902	0.487561	-0.802552	134004	Anti-EBV	4.56724	0.00046055	4.56724	4.56724	4.56724
54339089	-0.661494	0.290657	0.362608	0.0603733	0.451061	0.253425	0.441211	0.515817	0.513099	-1.00018	54339089	Anti-EBV	5.35241	0.000554232	5.35241	5.35241	5.35241
355902	-0.660684	0.938971	0.458163	0.261987	1.8047	0.172478	0.2947	0.848506	0.593412	0.771597	355902	Anti-EBV	1.72716	0.000121693	1.72716	1.72716	1.72716
453997	-0.660684	0.938971	0.458163	0.261987	1.8047	0.172478	0.2947	0.848506	0.593412	-0.527009	453997	Anti-EBV	25.3726	0.00294289	25.3726	25.3726	25.3726
9900206	-0.658658	0.853051	0.412705	0.362507	0.363941	0.25514	0.161967	0.11743	0.436311	-0.155408	9900206	Anti-EBV	2.1665	0.000174112	2.1665	2.1665	2.1665
268421	-0.654634	0.476297	0.377714	0.269466	-0.790935	0.0465917	0.132226	0.0422018	0.4086	-1.25625	268421	Nontox	1.12133	4.94093e-05	1.12133	1.12133	1.12133
92245911	-0.654634	0.476297	0.377714	0.269466	-0.790935	0.0465917	0.132226	0.0422018	0.4086	-1.25625	92245911	Nontox	1.12133	4.94093e-05	1.12133	1.12133	1.12133
97304120	-0.653751	0.335222	0.430199	0.0816559	-0.538315	0.00445911	0.0865067	0.0449557	0.435916	0.199841	97304120	Hydrogel	9.74908	0.00107881	9.74908	9.74908	9.74908
136674916	-0.652404	0.67101	0.382281	0.177407	-0.983676	0.0130498	0.168914	0.491441	0.582165	-1.81966	136674916	Nontox	1.26749	6.68477e-05	1.26749	1.26749	1.26749
117940991	-0.652283	0.589088	0.401847	0.129358	0.40147	0.0520423	0.102331	0.0398969	0.439421	-0.119206	117940991	Anti-EBV	2.08837	0.000164789	2.08837	2.08837	2.08837
131881293	-0.651335	0.861977	0.427927	0.258732	1.34198	0.467828	0.746022	0.870638	0.83957	-0.119206	131881293	Anti-EBV	4.59032	0.000463304	4.59032	4.59032	4.59032
110158190	-0.650722	0.0699827	0.341728	0.0414857	0.101453	0.143696	0.802195	0.490317	0.825521	-0.119206	110158190	Anti-EBV	1.29419	7.00332e-05	1.29419	1.29419	1.29419
135600345	-0.648763	0.809459	0.419106	0.187171	3.59955	0.167261	0.206999	0.259194	0.547304	-0.119206	135600345	Anti-EBV	10.638	0.00118487	10.638	10.638	10.638
21125843	-0.64846	0.493008	0.384662	0.280796	1.05414	0.0710774	0.127257	0.207349	0.583161	1.48988	21125843	Hydrogel	1.06904	4.31701e-05	1.06904	1.06904	1.06904
10491412	-0.646835	0.742439	0.448008	0.173708	-0.350955	0.060851	0.0959125	0.0249735	0.645197	0.830171	10491412	Hydrogel	6.35221	0.00067352	6.35221	6.35221	6.35221
137699364	-0.64581	0.0838284	0.321872	0.0400387	0.796062	0.284879	0.110415	0.0105845	0.432317	0.830171	137699364	Hydrogel	0.740554	3.97775e-06	0.740554	0.740554	0.740554
5272754	-0.643027	0.745736	0.422181	0.0426852	0.57043	0.230389	0.430425	0.357358	0.813548	0.830171	5272754	Hydrogel	1.00981	3.61032e-05	1.00981	1.00981	1.00981
15289165	-0.642956	0.865	0.403413	0.477602	1.51577	0.447587	0.647983	0.87984	0.746578	0.830171	15289165	Anti-EBV	1.36527	7.85147e-05	1.36527	1.36527	1.36527
10107217	-0.642347	0.354538	0.37652	0.315952	-0.0376917	0.221262	0.0921235	0.0828975	0.581155	0.830171	10107217	Hydrogel	2.73686	0.000242163	2.73686	2.73686	2.73686
11825687	-0.641916	0.601898	0.449764	0.178535	1.62886	0.396601	0.583262	0.789543	0.703136	0.117347	11825687	Anti-EBV	3.5224	0.000335888	3.5224	3.5224	3.5224
135410347	-0.641878	0.859053	0.407545	0.210702	0.307741	0.255505	0.342675	0.454773	0.633011	-1.54002	135410347	Anti-EBV	2.20233	0.000178387	2.20233	2.20233	2.20233
135398550	-0.641082	0.707939	0.388691	0.0909538	-0.371996	0.0357001	0.172491	0.51426	0.569515	1.2356	135398550	Hydrogel	9.15555	0.001008	9.15555	9.15555	9.15555
131885345	-0.637637	0.336484	0.445595	0.155275	1.39979	0.625895	0.756497	0.730954	0.812321	1.2356	131885345	Anti-EBV	0.831051	1.47753e-05	0.831051	0.831051	0.831051
121487449	-0.630053	0.412253	0.427608	0.089443	-0.484038	0.100759	0.0601353	0.0359625	0.609823	1.2356	121487449	Hydrogel	17.3607	0.00198698	17.3607	17.3607	17.3607
22880824	-0.628075	0.616496	0.417037	0.184192	0.450963	0.115724	0.617917	0.511729	0.654138	1.2356	22880824	Hydrogel	1.73545	0.000122682	1.73545	1.73545	1.73545
11358266	-0.626497	0.21623	0.438347	0.241417	0.560073	0.354769	0.725108	0.809322	0.642895	-0.0847193	11358266	Anti-EBV	2.39016	0.000200797	2.39016	2.39016	2.39016
135463451	-0.626341	0.55612	0.396638	0.111991	-1.06803	0.023395	0.109828	0.497404	0.689355	-0.57484	135463451	Hydrogel	0.871975	1.9658e-05	0.871975	0.871975	0.871975
131884920	-0.625641	0.629283	0.440031	0.304867	4.01646	0.596324	0.754779	0.912238	0.668949	-0.57484	131884920	Anti-EBV	128.486	0.0152457	128.486	128.486	128.486
124345	-0.625545	0.538279	0.368897	0.171728	-0.742741	0.0347496	0.0592068	0.0217829	0.643134	-1.37977	124345	Nontox	0.967261	3.10269e-05	0.967261	0.967261	0.967261
92286287	-0.625545	0.538279	0.368897	0.171728	-0.742741	0.0347496	0.0592068	0.0217829	0.643134	1.16348	92286287	Hydrogel	22.2927	0.00257543	22.2927	22.2927	22.2927
121486830	-0.624641	0.110613	0.423153	0.149205	1.53767	0.615845	0.700844	0.901423	0.69509	1.16348	121486830	Anti-EBV	1.00305	3.52967e-05	1.00305	1.00305	1.00305
188276	-0.623202	0.499289	0.381355	0.159487	1.98422	0.210483	0.0590946	0.0489646	0.452942	-1.24059	188276	Anti-EBV	6.67957	0.000712578	6.67957	6.67957	6.67957
21769737	-0.622777	0.346322	0.400075	0.118347	0.0266163	0.0652654	0.402605	0.369081	0.845765	-0.786566	21769737	Anti-EBV	6.31364	0.000668919	6.31364	6.31364	6.31364
98625	-0.622723	0.609373	0.412557	0.0391187	-0.255445	0.155715	0.509173	0.743052	0.819537	-1.1799	98625	Anti-EBV	1.63929	0.000111208	1.63929	1.63929	1.63929
44366461	-0.621329	0.682635	0.35912	0.134248	-0.418032	0.400566	0.120731	0.227663	0.413515	0.37304	44366461	Hydrogel	6.20969	0.000656516	6.20969	6.20969	6.20969
515085	-0.620299	0.606216	0.402244	0.175436	-0.659782	0.119051	0.122473	0.0317322	0.464095	0.37304	515085	Hydrogel	36.2743	0.00424361	36.2743	36.2743	36.2743
155905558	-0.619436	0.42106	0.383268	0.101255	-0.525073	0.00431635	0.0907213	0.0468404	0.540425	1.46503	155905558	Hydrogel	30.5284	0.00355805	30.5284	30.5284	30.5284
134520771	-0.617626	0.368183	0.324079	0.0856593	2.08734	0.160429	0.131221	0.0314193	0.44914	-0.761017	134520771	Anti-EBV	27.3823	0.00318268	27.3823	27.3823	27.3823
131850900	-0.614312	0.826317	0.400872	0.120117	0.659909	0.326663	0.477553	0.327037	0.677648	-0.761017	131850900	Anti-EBV	12.9892	0.00146539	12.9892	12.9892	12.9892
155905580	-0.61388	0.544441	0.407281	0.195611	-0.563713	0.0222621	0.0793081	0.126082	0.581408	0.157841	155905580	Hydrogel	21.0421	0.00242622	21.0421	21.0421	21.0421
188350	-0.613811	0.155258	0.347035	0.0433901	-1.20838	0.065185	0.297752	0.752213	0.746625	0.548359	188350	Hydrogel	3.47133	0.000329794	3.47133	3.47133	3.47133
3012549	-0.61062	0.940564	0.314669	0.219308	0.506111	0.204074	0.239551	0.0831492	0.560252	0.548359	3012549	Hydrogel	0.7606	6.36956e-06	0.7606	0.7606	0.7606
71435310	-0.610256	0.337206	0.358971	0.123546	-1.26184	0.0708024	0.365063	0.73952	0.731839	-0.315961	71435310	Hydrogel	1.34582	7.61941e-05	1.34582	1.34582	1.34582
54297338	-0.609621	0.670276	0.401133	0.057486	-0.570086	0.077384	0.485095	0.211967	0.682129	-0.315961	54297338	Hydrogel	9.79396	0.00108417	9.79396	9.79396	9.79396
125734	-0.609621	0.670276	0.401133	0.057486	-0.570086	0.077384	0.485095	0.211967	0.682129	-1.2184	125734	Anti-EBV	0.798929	1.09427e-05	0.798929	0.798929	0.798929
121487030	-0.608595	0.162271	0.405421	0.192185	-0.790229	0.252998	0.0884886	0.141276	0.505868	0.836506	121487030	Hydrogel	11.9578	0.00134234	11.9578	11.9578	11.9578
133609839	-0.60679	0.209089	0.423136	0.0602195	0.931165	0.256607	0.134917	0.109519	0.536006	-0.0322297	133609839	Anti-EBV	3.07832	0.000282903	3.07832	3.07832	3.07832
502242	-0.606508	0.10028	0.313901	0.0592894	-0.715448	0.0277561	0.381964	0.0625239	0.338412	-1.23727	502242	Nontox	1.00233	3.52104e-05	1.00233	1.00233	1.00233
13989304	-0.605508	0.782917	0.443529	0.305198	2.35584	0.0123804	0.21385	0.100246	0.480852	-1.72485	13989304	Anti-EBV	4.44851	0.000446384	4.44851	4.44851	4.44851
131852043	-0.605465	0.197245	0.330663	0.0958009	0.191721	0.120631	0.110736	0.0639215	0.635946	1.03203	131852043	Hydrogel	2.19778	0.000177843	2.19778	2.19778	2.19778
6481236	-0.604919	0.571295	0.37082	0.388337	-0.432415	0.192119	0.10276	0.0844049	0.494264	-0.771174	6481236	Anti-EBV	2.1743	0.000175042	2.1743	2.1743	2.1743
57453628	-0.604919	0.571295	0.37082	0.388337	-0.432415	0.192119	0.10276	0.0844049	0.494264	-0.709912	57453628	Anti-EBV	3.03027	0.000277171	3.03027	3.03027	3.03027
124223848	-0.604919	0.571295	0.37082	0.388337	-0.432415	0.192119	0.10276	0.0844049	0.494264	0.790242	124223848	Hydrogel	10.7297	0.00119582	10.7297	10.7297	10.7297
44451208	-0.603778	0.339754	0.39358	0.0490068	-0.724271	0.0568089	0.219373	0.6765	0.634293	1.27651	44451208	Hydrogel	22.773	0.00263273	22.773	22.773	22.773
92229576	-0.603778	0.339754	0.39358	0.0490068	-0.724271	0.0568089	0.219373	0.6765	0.634293	1.27651	92229576	Hydrogel	22.773	0.00263273	22.773	22.773	22.773
136030678	-0.602669	0.596658	0.41357	0.302024	1.27584	0.489551	0.121656	0.94773	0.677117	1.27651	136030678	Hydrogel	0.707606	4.67098e-08	0.707606	0.707606	0.707606
150669	-0.602345	0.61184	0.416336	0.0824715	0.619644	0.0483489	0.477828	0.231737	0.852974	-0.34975	150669	Anti-EBV	6.13415	0.000647502	6.13415	6.13415	6.13415
29921449	-0.601531	0.81193	0.407355	0.391985	1.60192	0.226387	0.565733	0.715933	0.55259	-0.837135	29921449	Anti-EBV	13.9325	0.00157794	13.9325	13.9325	13.9325
512869	-0.601135	0.103203	0.414082	0.122353	-0.167275	0.0268802	0.0610697	0.0524271	0.373065	-0.890872	512869	Anti-EBV	2.82465	0.000252637	2.82465	2.82465	2.82465
92264349	-0.601135	0.103203	0.414082	0.122353	-0.167275	0.0268802	0.0610697	0.0524271	0.373065	-0.473013	92264349	Anti-EBV	4.0814	0.000402584	4.0814	4.0814	4.0814
131858703	-0.599133	0.902143	0.456822	0.299469	1.80696	0.591476	0.335989	0.944165	0.796079	-0.100517	131858703	Anti-EBV	6.11707	0.000645465	6.11707	6.11707	6.11707
5271015	-0.598845	0.2767	0.385538	0.170367	-0.663181	0.0368705	0.776114	0.4012	0.842947	0.0691669	5271015	Hydrogel	15.3876	0.00175156	15.3876	15.3876	15.3876
131881064	-0.598312	0.318006	0.391128	0.237204	-0.525038	0.673814	0.689653	0.756544	0.840613	1.12659	131881064	Hydrogel	32.578	0.0038026	32.578	32.578	32.578
92247204	-0.598312	0.318006	0.391128	0.237204	-0.525038	0.673814	0.689653	0.756544	0.840613	-0.292799	92247204	Hydrogel	5.18844	0.000534668	5.18844	5.18844	5.18844
125503985	-0.598228	0.467395	0.388335	0.0551512	-0.324485	0.0824591	0.431854	0.246915	0.837366	-0.911534	125503985	Anti-EBV	1.94265	0.000147404	1.94265	1.94265	1.94265
512130	-0.597568	0.966687	0.400723	0.0369473	1.73076	0.0289278	0.35679	0.230114	0.732492	1.60893	512130	Anti-EBV	0.785188	9.30316e-06	0.785188	0.785188	0.785188
102601363	-0.596734	0.540607	0.398711	0.0448693	0.0322265	0.0128531	0.027647	0.0178116	0.308115	-0.566242	102601363	Anti-EBV	28.4509	0.00331018	28.4509	28.4509	28.4509
121216248	-0.596453	0.361641	0.413777	0.235584	-0.11101	0.0428966	0.0934732	0.0377648	0.497294	-0.473399	121216248	Anti-EBV	4.87134	0.000496834	4.87134	4.87134	4.87134
121698	-0.596102	0.371928	0.394139	0.430366	0.007487	0.048536	0.106494	0.0299505	0.517073	0.920861	121698	Hydrogel	2.84708	0.000255314	2.84708	2.84708	2.84708
13052734	-0.596102	0.371928	0.394139	0.430366	0.007487	0.048536	0.106494	0.0299505	0.517073	-1.02825	13052734	Anti-EBV	2.68226	0.000235648	2.68226	2.68226	2.68226
512707	-0.593424	0.714147	0.389593	0.132498	-0.661147	0.0297382	0.395248	0.227901	0.799608	-0.0353384	512707	Hydrogel	12.3587	0.00139017	12.3587	12.3587	12.3587
489849	-0.592487	0.0639756	0.32388	0.0134276	0.46381	0.0906416	0.371263	0.845631	0.769078	-0.0353384	489849	Anti-EBV	1.97405	0.000151149	1.97405	1.97405	1.97405
10063737	-0.588092	0.129121	0.400329	0.0396264	-0.0318612	0.0305202	0.352318	0.59394	0.629642	-0.157112	10063737	Anti-EBV	1.11807	4.90198e-05	1.11807	1.11807	1.11807
65102	-0.587413	0.348502	0.374476	0.0758302	0.0985539	0.246577	0.57023	0.28787	0.764819	2.11776	65102	Hydrogel	4.86988	0.000496659	4.86988	4.86988	4.86988
58834006	-0.587413	0.348502	0.374476	0.0758302	0.0985539	0.246577	0.57023	0.28787	0.764819	0.232038	58834006	Hydrogel	0.982283	3.28191e-05	0.982283	0.982283	0.982283
21820463	-0.587413	0.348502	0.374476	0.0758302	0.0985539	0.246577	0.57023	0.28787	0.764819	-0.637032	21820463	Anti-EBV	20.2521	0.00233195	20.2521	20.2521	20.2521
12800105	-0.587413	0.348502	0.374476	0.0758302	0.0985539	0.246577	0.57023	0.28787	0.764819	0.0610108	12800105	Anti-EBV	0.788971	9.75458e-06	0.788971	0.788971	0.788971
135435173	-0.587239	0.736093	0.379672	0.22	-0.359945	0.270911	0.125851	0.318381	0.552294	1.60214	135435173	Hydrogel	12.9144	0.00145647	12.9144	12.9144	12.9144
211875	-0.587113	0.326923	0.37704	0.306174	0.101619	0.16845	0.180563	0.117822	0.585864	0.384341	211875	Hydrogel	1.28761	6.92486e-05	1.28761	1.28761	1.28761
136195916	-0.584989	0.757134	0.401016	0.2512	0.633836	0.519315	0.13563	0.759802	0.630078	0.857086	136195916	Hydrogel	0.966134	3.08924e-05	0.966134	0.966134	0.966134
121486862	-0.584001	0.688851	0.404494	0.287749	0.387771	0.410101	0.468909	0.309233	0.769558	-0.0888943	121486862	Anti-EBV	2.06858	0.000162429	2.06858	2.06858	2.06858
135422917	-0.581845	0.891415	0.39025	0.259045	0.291775	0.17639	0.128532	0.931783	0.529241	-0.282889	135422917	Anti-EBV	3.42539	0.000324313	3.42539	3.42539	3.42539
15953881	-0.580272	0.0981363	0.36874	0.0640108	-0.0939009	0.57843	0.690273	0.382468	0.7776	-1.46672	15953881	Anti-EBV	1.48302	9.2564e-05	1.48302	1.48302	1.48302
451915	-0.580272	0.0981363	0.36874	0.0640108	-0.0939009	0.57843	0.690273	0.382468	0.7776	-1.74335	451915	Anti-EBV	1.29848	7.05459e-05	1.29848	1.29848	1.29848
135616711	-0.578916	0.530129	0.413901	0.249256	-0.605548	0.0958712	0.0849866	0.0881051	0.649963	-1.69285	135616711	Nontox	0.741737	4.11896e-06	0.741737	0.741737	0.741737
101784714	-0.578705	0.346009	0.393985	0.118867	-0.274214	0.157328	0.294264	0.505504	0.568605	-1.65673	101784714	Anti-EBV	1.10654	4.76444e-05	1.10654	1.10654	1.10654
10782439	-0.578525	0.234585	0.392245	0.0474517	-0.489683	0.0715567	0.274602	0.666019	0.67021	-0.0913564	10782439	Hydrogel	7.04667	0.000756378	7.04667	7.04667	7.04667
13993514	-0.578468	0.24818	0.329497	0.0313105	-0.371556	0.571035	0.568302	0.452245	0.668665	-0.0913564	13993514	Hydrogel	2.62205	0.000228464	2.62205	2.62205	2.62205
10198304	-0.578468	0.24818	0.329497	0.0313105	-0.371556	0.571035	0.568302	0.452245	0.668665	-1.8755	10198304	Anti-EBV	0.932703	2.69037e-05	0.932703	0.932703	0.932703
135538642	-0.577898	0.465678	0.351594	0.15317	-1.14223	0.209497	0.151433	0.395027	0.495129	1.05226	135538642	Hydrogel	4.79214	0.000487384	4.79214	4.79214	4.79214
136076706	-0.577898	0.77581	0.365501	0.197871	-0.809846	0.111954	0.101279	0.404397	0.581364	-1.25641	136076706	Nontox	1.44162	8.7624e-05	1.44162	1.44162	1.44162
135532713	-0.577898	0.465678	0.351594	0.15317	-1.14223	0.209497	0.151433	0.395027	0.495129	-0.6144	135532713	Nontox	0.804885	1.16533e-05	0.804885	0.804885	0.804885
135538671	-0.577898	0.465678	0.351594	0.15317	-1.14223	0.209497	0.151433	0.395027	0.495129	1.27211	135538671	Hydrogel	5.34306	0.000553115	5.34306	5.34306	5.34306
135434940	-0.577898	0.77581	0.365501	0.197871	-0.809846	0.111954	0.101279	0.404397	0.581364	-2.64675	135434940	Nontox	0.885675	2.12926e-05	0.885675	0.885675	0.885675
135800807	-0.577898	0.465678	0.351594	0.15317	-1.14223	0.209497	0.151433	0.395027	0.495129	-2.64675	135800807	Nontox	1.23756	6.32769e-05	1.23756	1.23756	1.23756
136854232	-0.577898	0.77581	0.365501	0.197871	-0.809846	0.111954	0.101279	0.404397	0.581364	-2.64675	136854232	Nontox	0.885675	2.12926e-05	0.885675	0.885675	0.885675
135433837	-0.577898	0.77581	0.365501	0.197871	-0.809846	0.111954	0.101279	0.404397	0.581364	-1.07976	135433837	Nontox	1.92229	0.000144974	1.92229	1.92229	1.92229
137274215	-0.577898	0.77581	0.365501	0.197871	-0.809846	0.111954	0.101279	0.404397	0.581364	-1.07976	137274215	Nontox	1.92229	0.000144974	1.92229	1.92229	1.92229
136236459	-0.576582	0.835842	0.385818	0.142062	0.454016	0.433007	0.100666	0.404095	0.57176	0.253406	136236459	Anti-EBV	1.04891	4.07681e-05	1.04891	1.04891	1.04891
73651	-0.575851	0.0380932	0.31798	0.0284811	-0.438576	0.36018	0.755002	0.424227	0.777225	0.199754	73651	Hydrogel	7.28245	0.00078451	7.28245	7.28245	7.28245
44308741	-0.575851	0.0380932	0.31798	0.0284811	-0.438576	0.36018	0.755002	0.424227	0.777225	-0.77563	44308741	Anti-EBV	1.67874	0.000115916	1.67874	1.67874	1.67874
490435	-0.575851	0.0380932	0.31798	0.0284811	-0.438576	0.36018	0.755002	0.424227	0.777225	2.24026	490435	Hydrogel	28.3017	0.00329237	28.3017	28.3017	28.3017
137128749	-0.575425	0.229875	0.380438	0.0545112	0.602654	0.0568305	0.15434	0.655054	0.621223	2.24026	137128749	Hydrogel	2.67292	0.000234534	2.67292	2.67292	2.67292
10611197	-0.574076	0.484939	0.376693	0.178532	-0.480488	0.0753234	0.0946565	0.0686699	0.455355	1.04586	10611197	Hydrogel	23.7684	0.00275149	23.7684	23.7684	23.7684
14843513	-0.57363	0.565488	0.417001	0.158565	-0.70007	0.20843	0.189225	0.774507	0.574718	-2.7023	14843513	Nontox	0.796409	1.0642e-05	0.796409	0.796409	0.796409
455179	-0.573515	0.905294	0.345687	0.0884077	0.0138558	0.475142	0.224482	0.487319	0.655867	-0.355688	455179	Anti-EBV	3.10612	0.000286221	3.10612	3.10612	3.10612
454528	-0.573515	0.905294	0.345687	0.0884077	0.0138558		0.224482	0.487319	0.655867	-0.355688	454528	Anti-EBV	3.10612	0.000286221	3.10612	3.10612	3.10612
454530	-0.573515	0.905294	0.345687	0.0884077	0.0138558		0.224482	0.487319	0.655867	-0.284766	454530	Anti-EBV	2.16956	0.000174477	2.16956	2.16956	2.16956
373953	-0.573083	0.277465	0.347908	0.1245	-0.96533	0.235251	0.638402	0.452204	0.755119	-0.166059	373953	Hydrogel	2.17452	0.000175068	2.17452	2.17452	2.17452
121228750	-0.571388	0.570197	0.392747	0.278674	1.21174	0.152879	0.227327	0.796892	0.668599	1.25526	121228750	Hydrogel	0.741615	4.10438e-06	0.741615	0.741615	0.741615
102381563	-0.570762	0.256288	0.40301	0.397766	-0.390783	0.0215731	0.615863	0.544132	0.790577	0.834046	102381563	Hydrogel	10.3306	0.00114819	10.3306	10.3306	10.3306
22885207	-0.569931	0.522551	0.386826	0.161644	-0.164478	0.171425	0.275372	0.886632	0.80329	1.42908	22885207	Hydrogel	6.2652	0.000663139	6.2652	6.2652	6.2652
10611929	-0.568948	0.426481	0.413101	0.0770335	-0.145441	0.056644	0.620901	0.26533	0.838666	1.42908	10611929	Hydrogel	5.9647	0.000627285	5.9647	5.9647	5.9647
12358319	-0.568792	0.422567	0.412794	0.0770335	-0.0792019	0.0600363	0.628077	0.252901	0.836225	0.523433	12358319	Hydrogel	2.44779	0.000207673	2.44779	2.44779	2.44779
512657	-0.568347	0.449063	0.388607	0.0722454	0.708937	0.185748	0.244177	0.530171	0.823483	0.523433	512657	Anti-EBV	0.947383	2.86552e-05	0.947383	0.947383	0.947383
71313037	-0.568335	0.450834	0.457515	0.0770335	-0.131637	0.056644	0.586277	0.280853	0.836239	0.523433	71313037	Hydrogel	2.82841	0.000253085	2.82841	2.82841	2.82841
71776184	-0.568335	0.450834	0.457515	0.0770335	-0.131637	0.056644	0.586277	0.280853	0.836239	0.523433	71776184	Hydrogel	2.82841	0.000253085	2.82841	2.82841	2.82841
121486927	-0.564709	0.168532	0.417429	0.272062	1.7658	0.699014	0.654908	0.846455	0.69337	0.523433	121486927	Anti-EBV	2.32173	0.000192632	2.32173	2.32173	2.32173
11032861	-0.564697	0.423666	0.406047	0.0770335	-0.0923846	0.056644	0.619642	0.261851	0.839821	-0.511258	11032861	Anti-EBV	11.7891	0.00132221	11.7891	11.7891	11.7891
13566115	-0.564604	0.806685	0.447801	0.291334	2.7961	0.0083119	0.261188	0.230116	0.497518	-1.67456	13566115	Anti-EBV	4.98897	0.000510869	4.98897	4.98897	4.98897
22880803	-0.564246	0.791675	0.408567	0.386324	0.540269	0.21792	0.445164	0.599711	0.636988	-0.210588	22880803	Anti-EBV	3.7095	0.000358211	3.7095	3.7095	3.7095
73345328	-0.563313	0.651563	0.405715	0.0908357	-1.79558	0.435167	0.316165	0.356397	0.713479	1.02684	73345328	Hydrogel	2.53203	0.000217724	2.53203	2.53203	2.53203
44146603	-0.5632	0.482407	0.40593	0.217548	-0.262348	0.0434962	0.0685676	0.066987	0.524414	1.02684	44146603	Hydrogel	6.76685	0.000722992	6.76685	6.76685	6.76685
70385614	-0.560463	0.213469	0.360212	0.208429	0.0947155	0.0252562	0.666729	0.235547	0.710664	0.167135	70385614	Hydrogel	0.863406	1.86356e-05	0.863406	0.863406	0.863406
267808	-0.55761	0.501682	0.330744	0.0999546	-0.577399	0.0478587	0.199924	0.0647029	0.659151	0.167135	267808	Hydrogel	52.461	0.00617489	52.461	52.461	52.461
14682078	-0.55761	0.501682	0.330744	0.0999546	-0.577399	0.0478587	0.199924	0.0647029	0.659151	0.167135	14682078	Hydrogel	52.461	0.00617489	52.461	52.461	52.461
66649608	-0.55657	0.545871	0.391909	0.195731	-0.137228	0.0815498	0.115757	0.0564411	0.558185	0.167135	66649608	Hydrogel	1.7335	0.000122449	1.7335	1.7335	1.7335
21769748	-0.556164	0.366561	0.385304	0.251503	0.837372	0.130797	0.53978	0.480827	0.848622	1.19658	21769748	Hydrogel	1.07163	4.34793e-05	1.07163	1.07163	1.07163
23629091	-0.555838	0.576612	0.414019	0.373383	1.94712	0.567459	0.525683	0.691434	0.638902	-0.650724	23629091	Anti-EBV	38.0067	0.00445031	38.0067	38.0067	38.0067
13872084	-0.55464	0.573836	0.413707	0.165112	-0.266823	0.400109	0.501942	0.473472	0.613479	0.115457	13872084	Hydrogel	2.58534	0.000224085	2.58534	2.58534	2.58534
92237723	-0.55443	0.474107	0.363014	0.0670145	-0.181337	0.0999204	0.145522	0.283637	0.657367	-0.740689	92237723	Anti-EBV	3.53964	0.000337945	3.53964	3.53964	3.53964
21627890	-0.55443	0.474107	0.363014	0.0670145	-0.181337	0.0999204	0.145522	0.283637	0.657367	0.345959	21627890	Hydrogel	2.70572	0.000238448	2.70572	2.70572	2.70572
471486	-0.554347	0.617792	0.374964	0.212703	-0.100319	0.354681	0.0839295	0.0348972	0.532786	-1.03334	471486	Anti-EBV	2.04755	0.00015992	2.04755	2.04755	2.04755
511669	-0.55422	0.354301	0.353427	0.0800102	0.0366147	0.0128492	0.126047	0.0945644	0.379979	-1.03334	511669	Anti-EBV	2.451	0.000208055	2.451	2.451	2.451
121487049	-0.55422	0.354301	0.353427	0.0800102	0.0366147	0.0128492	0.126047	0.0945644	0.379979	-0.0105618	121487049	Anti-EBV	0.829805	1.46266e-05	0.829805	0.829805	0.829805
490630	-0.553291	0.771862	0.392134	0.113936	1.11631	0.348061	0.40686	0.547322	0.703845	-0.309811	490630	Anti-EBV	8.98996	0.000988237	8.98996	8.98996	8.98996
58761796	-0.553181	0.121872	0.321456	0.080724	0.394621	0.116564	0.327122	0.5615	0.48317	-1.01677	58761796	Anti-EBV	3.59837	0.000344952	3.59837	3.59837	3.59837
122707085	-0.550687	0.242054	0.353497	0.0263985	-1.03065	0.0148406	0.232222	0.700647	0.517324	-1.44644	122707085	Nontox	2.33952	0.000194754	2.33952	2.33952	2.33952
297594	-0.550687	0.242054	0.353497	0.0263985	-1.03065	0.0148406	0.232222	0.700647	0.517324	-1.44644	297594	Nontox	2.33952	0.000194754	2.33952	2.33952	2.33952
451856	-0.55057	0.264302	0.352945	0.0790935	-0.454703	0.107786	0.114223	0.0619967	0.397009	1.04797	451856	Hydrogel	22.8709	0.00264441	22.8709	22.8709	22.8709
14430362	-0.550439	0.711791	0.432688	0.0342889	0.197617	0.17925	0.260834	0.618576	0.489216	0.961784	14430362	Hydrogel	2.15174	0.00017235	2.15174	2.15174	2.15174
452096	-0.550439	0.711791	0.432688	0.0342889	0.197617	0.17925	0.260834	0.618576	0.489216	1.04797	452096	Hydrogel	2.31467	0.00019179	2.31467	2.31467	2.31467
11065406	-0.550327	0.33145	0.386852	0.0854439	-0.442919	0.0897734	0.510177	0.353019	0.640349	1.04797	11065406	Hydrogel	20.3345	0.00234178	20.3345	20.3345	20.3345
92233963	-0.550327	0.33145	0.386852	0.0854439	-0.442919	0.0897734	0.510177	0.353019	0.640349	0.961784	92233963	Hydrogel	19.1998	0.00220641	19.1998	19.1998	19.1998
3007920	-0.549578	0.54792	0.374645	0.276663	-0.790678	0.159768	0.429977	0.558607	0.714963	1.04797	3007920	Hydrogel	10.0772	0.00111796	10.0772	10.0772	10.0772
124715	-0.549578	0.54792	0.374645	0.276663	-0.790678	0.159768	0.429977	0.558607	0.714963	0.961784	124715	Hydrogel	9.57167	0.00105764	9.57167	9.57167	9.57167
3006222	-0.549578	0.54792	0.374645	0.276663	-0.790678	0.159768	0.429977	0.558607	0.714963	0.961784	3006222	Hydrogel	9.57167	0.00105764	9.57167	9.57167	9.57167
121217034	-0.549417	0.441179	0.382109	0.13582	1.2408	0.0544338	0.161033	0.0453917	0.525313	0.961784	121217034	Anti-EBV	0.96821	3.11401e-05	0.96821	0.96821	0.96821
121487456	-0.548822	0.0588466	0.324559	0.0631098	-0.350092	0.00182617	0.083622	0.0442881	0.246102	0.852762	121487456	Hydrogel	9.26623	0.0010212	9.26623	9.26623	9.26623
15934097	-0.547799	0.402247	0.416228	0.0878394	-1.31668	0.313907	0.419077	0.0603082	0.514284	-1.94263	15934097	Nontox	2.44422	0.000207247	2.44422	2.44422	2.44422
21829540	-0.547311	0.69889	0.378201	0.0786214	0.401982	0.353785	0.242684	0.252758	0.569264	-1.94263	21829540	Anti-EBV	1.66924	0.000114782	1.66924	1.66924	1.66924
135443731	-0.547266	0.743853	0.352966	0.18443	-0.600834	0.160231	0.150617	0.422421	0.39283	-1.94263	135443731	Nontox	0.763558	6.72251e-06	0.763558	0.763558	0.763558
131884619	-0.546325	0.129974	0.412179	0.0506139	0.203368	0.0365925	0.332725	0.67151	0.825506	0.483892	131884619	Hydrogel	1.23626	6.31218e-05	1.23626	1.23626	1.23626
125494152	-0.545983	0.717294	0.452344	0.0713081	-0.175287	0.0693593	0.0537536	0.0322012	0.514302	-0.296197	125494152	Anti-EBV	1.39158	8.1654e-05	1.39158	1.39158	1.39158
125494151	-0.545983	0.717294	0.452344	0.0713081	-0.175287	0.0693593	0.0537536	0.0322012	0.514302	0.547479	125494151	Hydrogel	3.46435	0.000328961	3.46435	3.46435	3.46435
135483941	-0.545697	0.883533	0.381945	0.27786	-0.327814	0.0846843	0.0957767	0.53055	0.446332	-0.24804	135483941	Hydrogel	1.22482	6.17568e-05	1.22482	1.22482	1.22482
135483976	-0.545697	0.883533	0.381945	0.27786	-0.327814	0.0846843	0.0957767	0.53055	0.446332	-0.24804	135483976	Hydrogel	1.22482	6.17568e-05	1.22482	1.22482	1.22482
139086336	-0.543742	0.809555	0.397766	0.50137	1.25123	0.5676	0.539462	0.86479	0.817738	-0.24804	139086336	Anti-EBV	7.87706	0.000855455	7.87706	7.87706	7.87706
94725030	-0.541749	0.333751	0.392858	0.163074	-0.0554992	0.0764617	0.610541	0.241608	0.809177	-2.21732	94725030	Anti-EBV	1.1175	4.89524e-05	1.1175	1.1175	1.1175
92131953	-0.541749	0.356053	0.379092	0.047342	0.0401534	0.0579515	0.616645	0.167562	0.809656	-1.26914	92131953	Anti-EBV	1.83842	0.000134968	1.83842	1.83842	1.83842
9816781	-0.541749	0.356053	0.379092	0.047342	0.0401534	0.0579515	0.616645	0.167562	0.809656	0.869533	9816781	Hydrogel	2.7227	0.000240474	2.7227	2.7227	2.7227
92233339	-0.541749	0.356053	0.379092	0.047342	0.0401534	0.0579515	0.616645	0.167562	0.809656	-0.110925	92233339	Anti-EBV	1.20299	5.91525e-05	1.20299	1.20299	1.20299
266234	-0.541749	0.356053	0.379092	0.047342	0.0401534	0.0579515	0.616645	0.167562	0.809656	0.175405	266234	Hydrogel	1.03579	3.9203e-05	1.03579	1.03579	1.03579
12800104	-0.541749	0.333751	0.392858	0.163074	-0.0554992	0.0764617	0.610541	0.241608	0.809177	0.175405	12800104	Hydrogel	1.37863	8.01085e-05	1.37863	1.37863	1.37863
58834035	-0.541749	0.333751	0.392858	0.163074	-0.0554992	0.0764617	0.610541	0.241608	0.809177	-0.776243	58834035	Anti-EBV	3.63942	0.00034985	3.63942	3.63942	3.63942
57061669	-0.541749	0.356053	0.379092	0.047342	0.0401534	0.0579515	0.616645	0.167562	0.809656	0.175405	57061669	Hydrogel	1.03579	3.9203e-05	1.03579	1.03579	1.03579
94725032	-0.541749	0.333751	0.392858	0.163074	-0.0554992	0.0764617	0.610541	0.241608	0.809177	0.175405	94725032	Hydrogel	1.37863	8.01085e-05	1.37863	1.37863	1.37863
447594	-0.541749	0.333751	0.392858	0.163074	-0.0554992	0.0764617	0.610541	0.241608	0.809177	-0.0691803	447594	Anti-EBV	0.748027	4.86936e-06	0.748027	0.748027	0.748027
11032790	-0.541749	0.356053	0.379092	0.047342	0.0401534	0.0579515	0.616645	0.167562	0.809656	0.175405	11032790	Hydrogel	1.03579	3.9203e-05	1.03579	1.03579	1.03579
84392	-0.541749	0.356053	0.379092	0.047342	0.0401534	0.0579515	0.616645	0.167562	0.809656	-0.753037	84392	Anti-EBV	4.60166	0.000464657	4.60166	4.60166	4.60166
3035929	-0.541749	0.333751	0.392858	0.163074	-0.0554992	0.0764617	0.610541	0.241608	0.809177	-0.213394	3035929	Anti-EBV	1.38709	8.11181e-05	1.38709	1.38709	1.38709
14191021	-0.540628	0.203363	0.394399	0.0339734	-0.519331	0.0196139	0.481986	0.726848	0.661212	-0.534707	14191021	Anti-EBV	4.36927	0.00043693	4.36927	4.36927	4.36927
135771852	-0.538608	0.828308	0.385075	0.151415	0.811777	0.0788878	0.139169	0.441877	0.655294	0.4117	135771852	Anti-EBV	1.30247	7.10212e-05	1.30247	1.30247	1.30247
101339887	-0.538424	0.2745	0.357909		-0.0672406	0.474903	0.0904856	0.114402	0.432839	0.235304	101339887	Hydrogel	1.61512	0.000108325	1.61512	1.61512	1.61512
102531168	-0.538424	0.2745	0.357909	0.218915	-0.0672406	0.474903	0.0904856	0.114402	0.432839	0.0857462	102531168	Hydrogel	1.16625	5.47685e-05	1.16625	1.16625	1.16625
59504008	-0.537799	0.152989	0.423048	0.136945	-0.25888	0.014341	0.0838233	0.043159	0.41054	1.16882	59504008	Hydrogel	7.94564	0.000863637	7.94564	7.94564	7.94564
59504149	-0.537799	0.152989	0.423048	0.136945	-0.25888	0.014341	0.0838233	0.043159	0.41054	1.16882	59504149	Hydrogel	7.94564	0.000863637	7.94564	7.94564	7.94564
59504120	-0.537799	0.152989	0.423048	0.136945	-0.25888	0.014341	0.0838233	0.043159	0.41054	-0.305388	59504120	Anti-EBV	0.990048	3.37456e-05	0.990048	0.990048	0.990048
21854120	-0.537732	0.550805	0.349979	0.100862	-0.288448	0.0626365	0.0635926	0.0636585	0.691651	0.522442	21854120	Hydrogel	5.30708	0.000548823	5.30708	5.30708	5.30708
71337875	-0.536589	0.448545	0.339567	0.242832	-0.641115	0.0789118	0.475844	0.585047	0.713553	-1.14038	71337875	Nontox	1.00316	3.53099e-05	1.00316	1.00316	1.00316
71352385	-0.536589	0.448545	0.339567	0.242832	-0.641115	0.0789118	0.475844	0.585047	0.713553	0.267416	71352385	Hydrogel	11.5835	0.00129768	11.5835	11.5835	11.5835
59252566	-0.533842	0.225324	0.326681	0.046861	-0.893721	0.0896188	0.280663	0.805485	0.27836	1.50126	59252566	Hydrogel	8.70406	0.000954126	8.70406	8.70406	8.70406
131700647	-0.533792	0.125334	0.418939	0.148065	-0.613289	0.35942	0.411975	0.298835	0.566068	1.50126	131700647	Hydrogel	36.9032	0.00431865	36.9032	36.9032	36.9032
639614	-0.533792	0.125334	0.418939	0.148065	-0.613289	0.35942	0.411975	0.298835	0.566068	-0.747893	639614	Nontox	1.54217	9.96213e-05	1.54217	1.54217	1.54217
13941609	-0.53368	0.883556	0.37813	0.0495125	-1.5455	0.0328193	0.0226427	0.0153167	0.258838	-1.09508	13941609	Nontox	2.4697	0.000210287	2.4697	2.4697	2.4697
128656	-0.533648	0.596077	0.367175	0.0762558	1.40236	0.375228	0.56413	0.131622	0.719075	-1.09508	128656	Anti-EBV	5.58363	0.000581818	5.58363	5.58363	5.58363
13870936	-0.533295	0.323732	0.302784	0.0370504	0.343983	0.204021	0.296018	0.249559	0.563034	0.0853191	13870936	Anti-EBV	1.29841	7.05369e-05	1.29841	1.29841	1.29841
6566064	-0.532896	0.497426	0.424381	0.059235	-0.0291334	0.151995	0.562001	0.384584	0.874529	-0.340336	6566064	Anti-EBV	2.99245	0.000272658	2.99245	2.99245	2.99245
97480	-0.532896	0.497426	0.424381	0.059235	-0.0291334	0.151995	0.562001	0.384584	0.874529	-0.820931	97480	Anti-EBV	3.18035	0.000295077	3.18035	3.18035	3.18035
7099911	-0.532896	0.497426	0.424381	0.059235	-0.0291334	0.151995	0.562001	0.384584	0.874529	-0.820931	7099911	Anti-EBV	3.18035	0.000295077	3.18035	3.18035	3.18035
18881	-0.532896	0.497426	0.424381	0.059235	-0.0291334	0.151995	0.562001	0.384584	0.874529	1.18828	18881	Hydrogel	4.12465	0.000407744	4.12465	4.12465	4.12465
23617998	-0.532896	0.497426	0.424381	0.059235	-0.0291334	0.151995	0.562001	0.384584	0.874529	-1.62307	23617998	Anti-EBV	1.36059	7.7956e-05	1.36059	1.36059	1.36059
92161858	-0.532657	0.329885	0.34014	0.0319016	-0.684385	0.0173337	0.04593	0.052195	0.291085	-1.62307	92161858	Nontox	0.935685	2.72595e-05	0.935685	0.935685	0.935685
271276	-0.532657	0.329885	0.34014	0.0319016	-0.684385	0.0173337	0.04593	0.052195	0.291085	0.14601	271276	Hydrogel	7.03211	0.000754641	7.03211	7.03211	7.03211
24820718	-0.532489	0.336319	0.427621	0.157407	-0.392031	0.24138	0.162204	0.0401298	0.421789	0.14601	24820718	Hydrogel	6.1238	0.000646268	6.1238	6.1238	6.1238
13188936	-0.531599	0.730993	0.350674	0.0451702	0.117098	0.040573	0.0984672	0.0638981	0.316705	0.14601	13188936	Hydrogel	0.77012	7.50539e-06	0.77012	0.77012	0.77012
171798	-0.531398	0.425444	0.38871	0.0770335	-0.119729	0.058391	0.64547	0.254191	0.837104	-0.511075	171798	Anti-EBV	27.9212	0.00324698	27.9212	27.9212	27.9212
150625	-0.530823	0.763712	0.388541	0.119871	0.731427	0.0135329	0.0417816	0.0513493	0.343485	-0.511075	150625	Anti-EBV	89.6252	0.0106091	89.6252	89.6252	89.6252
92233380	-0.529732	0.587311	0.43059	0.243407	1.104	0.122107	0.259079	0.724788	0.617259	-0.511075	92233380	Anti-EBV	123.042	0.014596	123.042	123.042	123.042
131881445	-0.529732	0.587311	0.43059	0.243407	1.104	0.122107	0.259079	0.724788	0.617259	-1.29977	131881445	Anti-EBV	3.70746	0.000357967	3.70746	3.70746	3.70746
136795196	-0.529071	0.464597	0.390812	0.185776	-0.286099	0.0624383	0.467312	0.678251	0.635073	-0.087715	136795196	Hydrogel	1.86169	0.000137744	1.86169	1.86169	1.86169
136670059	-0.529071	0.464597	0.390812	0.185776	-0.286099	0.0624383	0.467312	0.678251	0.635073	-1.0715	136670059	Anti-EBV	1.34054	7.55643e-05	1.34054	1.34054	1.34054
451960	-0.52893	0.589272	0.387464	0.135935	-0.838761	0.574384	0.311625	0.325086	0.621686	-0.00692091	451960	Hydrogel	3.08967	0.000284257	3.08967	3.08967	3.08967
121487106	-0.527924	0.417656	0.416427	0.350627	0.99458	0.0221623	0.194285	0.192126	0.439707	0.24085	121487106	Anti-EBV	2.09361	0.000165414	2.09361	2.09361	2.09361
129787857	-0.527766	0.500013	0.393112	0.0866379	-0.597701	0.156959	0.39524	0.367538	0.61509	-0.975986	129787857	Nontox	0.968523	3.11775e-05	0.968523	0.968523	0.968523
456327	-0.52656	0.739921	0.375838	0.105177	-0.378891	0.0364887	0.207153	0.553377	0.719702	0.505281	456327	Hydrogel	9.17388	0.00101018	9.17388	9.17388	9.17388
461854	-0.52656	0.739921	0.375838	0.105177	-0.378891	0.0364887	0.207153	0.553377	0.719702	0.505281	461854	Hydrogel	9.17388	0.00101018	9.17388	9.17388	9.17388
456648	-0.52656	0.739921	0.375838	0.105177	-0.378891	0.0364887	0.207153	0.553377	0.719702	0.0801143	456648	Hydrogel	5.10248	0.000524411	5.10248	5.10248	5.10248
146674673	-0.525599	0.523152	0.377948	0.0628408	0.148188	0.357722	0.142827	0.263874	0.564945	0.0801143	146674673	Anti-EBV	0.866025	1.89481e-05	0.866025	0.866025	0.866025
3006944	-0.524844	0.332814	0.362679	0.148846	-0.836777	0.14613	0.0693028	0.197221	0.510757	-0.764357	3006944	Nontox	5.3832	0.000557905	5.3832	5.3832	5.3832
493453	-0.524531	0.282534	0.368957	0.191578	-1.48915	0.0765305	0.360793	0.362353	0.507461	0.237349	493453	Hydrogel	1.82406	0.000133254	1.82406	1.82406	1.82406
131853290	-0.524374	0.776919	0.446231	0.122368	-1.22966	0.0776203	0.432917	0.423113	0.573948	-0.023662	131853290	Hydrogel	1.71108	0.000119774	1.71108	1.71108	1.71108
135921348	-0.524046	0.957488	0.472037	0.0695564	-0.289531	0.260139	0.24399	0.445613	0.462649	-0.023662	135921348	Hydrogel	2.31026	0.000191264	2.31026	2.31026	2.31026
121217041	-0.523748	0.138631	0.414185	0.0579519	0.544265	0.155785	0.482827	0.492147	0.616364	-0.023662	121217041	Anti-EBV	2.3131	0.000191603	2.3131	2.3131	2.3131
54343230	-0.521806	0.398511	0.366033	0.258047	0.786342	0.0192624	0.200972	0.0864831	0.502307	-0.023662	54343230	Anti-EBV	3.0066	0.000274346	3.0066	3.0066	3.0066
131884262	-0.520702	0.226871	0.396004	0.0819029	-0.416307	0.0507702	0.389869	0.442257	0.602389	0.237349	131884262	Hydrogel	9.56074	0.00105634	9.56074	9.56074	9.56074
58078371	-0.519186	0.484831	0.359299	0.361527	0.772841	0.622135	0.0874219	0.0635153	0.569943	0.237349	58078371	Anti-EBV	1.70809	0.000119417	1.70809	1.70809	1.70809
121487074	-0.516653	0.312877	0.412816	0.0381165	0.557842	0.0652487	0.0932196	0.0553127	0.264535	-0.023662	121487074	Anti-EBV	2.37516	0.000199008	2.37516	2.37516	2.37516
3011894	-0.515141	0.371872	0.421042	0.153112	-0.072916	0.674655	0.545751	0.723995	0.787169	0.237349	3011894	Hydrogel	1.69927	0.000118364	1.69927	1.69927	1.69927
131880513	-0.514491	0.0724393	0.337104	0.0242631	-0.0986864	0.0862314	0.219057	0.865914	0.737813	0.237349	131880513	Hydrogel	1.84995	0.000136343	1.84995	1.84995	1.84995
90356982	-0.514185	0.521262	0.427342	0.218082	-0.643055	0.019736	0.100693	0.164077	0.464508	-0.023662	90356982	Hydrogel	6.08943	0.000642167	6.08943	6.08943	6.08943
452090	-0.513894	0.582145	0.361399	0.102718	-0.0425319	0.0447459	0.28985	0.349273	0.670956	-0.023662	452090	Hydrogel	0.763699	6.73925e-06	0.763699	0.763699	0.763699
509522	-0.513894	0.582145	0.361399	0.102718	-0.0425319	0.0447459	0.28985	0.349273	0.670956	0.237349	509522	Hydrogel	1.54678	0.000100171	1.54678	1.54678	1.54678
121486893	-0.513678	0.144996	0.358836	0.189067	-0.777639	0.0489106	0.484154	0.64443	0.398374	-0.344818	121486893	Hydrogel	1.61171	0.000107918	1.61171	1.61171	1.61171
11776820	-0.513569	0.118215	0.323163	0.0294473	-1.1322	0.320798	0.736271	0.503637	0.796549	1.41864	11776820	Hydrogel	5.1241	0.000526991	5.1241	5.1241	5.1241
10041129	-0.510169	0.118342	0.32006	0.0239451	-0.72548	0.0459789	0.264343	0.729828	0.756559	0.125808	10041129	Hydrogel	4.88402	0.000498346	4.88402	4.88402	4.88402
29982346	-0.509076	0.490118	0.45319	0.0943954	1.59428	0.115558	0.166999	0.741337	0.666383	0.125808	29982346	Anti-EBV	3.97806	0.000390254	3.97806	3.97806	3.97806
45039581	-0.509076	0.490118	0.45319	0.0943954	1.59428	0.115558	0.166999	0.741337	0.666383	-2.15613	45039581	Anti-EBV	2.5131	0.000215465	2.5131	2.5131	2.5131
11697766	-0.509076	0.490118	0.45319	0.0943954	1.59428	0.115558	0.166999	0.741337	0.666383	-2.15613	11697766	Anti-EBV	2.5131	0.000215465	2.5131	2.5131	2.5131
45052066	-0.509057	0.0845636	0.352911	0.0493397	-0.156946	0.0433818	0.100333	0.0096824	0.49085	-2.15613	45052066	Anti-EBV	1.00943	3.60581e-05	1.00943	1.00943	1.00943
156594694	-0.509057	0.0845636	0.352911	0.0493397	-0.156946	0.0433818	0.100333	0.0096824	0.49085	0.806466	156594694	Hydrogel	4.57636	0.000461638	4.57636	4.57636	4.57636
512705	-0.507729	0.279881	0.372684	0.139556	-1.23529	0.274301	0.401638	0.211279	0.497317	-0.187495	512705	Hydrogel	1.32954	7.4252e-05	1.32954	1.32954	1.32954
129561	-0.507372	0.158324	0.343888	0.0216609	-1.09563	0.0552301	0.26766	0.561796	0.569759	-0.187495	129561	Hydrogel	1.47608	9.17359e-05	1.47608	1.47608	1.47608
9813298	-0.507362	0.541235	0.407368	0.139533	-0.385963	0.548346	0.0520362	0.0586144	0.391484	-1.38096	9813298	Anti-EBV	0.903618	2.34335e-05	0.903618	0.903618	0.903618
10610233	-0.506994	0.670869	0.329185	0.177999	0.102496	0.011507	0.0757797	0.0434093	0.534944	-0.141876	10610233	Anti-EBV	1.65357	0.000112913	1.65357	1.65357	1.65357
454870	-0.506902	0.197642	0.352418	0.0908668	0.296598	0.0651315	0.488461	0.930145	0.57057	-0.141876	454870	Anti-EBV	2.40579	0.000202661	2.40579	2.40579	2.40579
330407	-0.506775	0.767708	0.376647		0.354672	0.0116465	0.0515176	0.0929716	0.409693	0.852386	330407	Hydrogel	1.52417	9.74727e-05	1.52417	1.52417	1.52417
131881789	-0.506775	0.767708	0.376647	0.0458938	0.354672	0.0116465	0.0515176	0.0929716	0.409693	-1.5125	131881789	Anti-EBV	1.91842	0.000144512	1.91842	1.91842	1.91842
5270525	-0.506749	0.767901	0.386986	0.239557	0.0269418	0.0326929	0.369246	0.298952	0.75647	1.43753	5270525	Hydrogel	4.44488	0.000445952	4.44488	4.44488	4.44488
67566518	-0.503859	0.625578	0.401802	0.331204	0.0236994	0.0268011	0.0705463	0.0820574	0.48551	1.43753	67566518	Hydrogel	4.49702	0.000452172	4.49702	4.49702	4.49702
11622526	-0.503775	0.309235	0.308396	0.0363377	-0.484218	0.098646	0.154018	0.0142108	0.693818	1.43753	11622526	Hydrogel	139.566	0.0165677	139.566	139.566	139.566
234984	-0.50333	0.6595	0.339673	0.0301607	0.250166	0.156569	0.281719	0.448035	0.72645	-1.58299	234984	Anti-EBV	1.69407	0.000117744	1.69407	1.69407	1.69407
191626	-0.503258	0.594275	0.443381	0.201207	0.908839	0.724589	0.14663	0.361331	0.370135	1.05282	191626	Hydrogel	0.851299	1.7191e-05	0.851299	0.851299	0.851299
10357262	-0.502795	0.310617	0.411423	0.0531098	0.258657	0.301884	0.525145	0.436991	0.697877	1.05282	10357262	Hydrogel	2.18204	0.000175965	2.18204	2.18204	2.18204
21855714	-0.502077	0.555073	0.426171	0.115656	-1.40705	0.0569429	0.516591	0.385511	0.553209	1.05282	21855714	Hydrogel	3.13691	0.000289894	3.13691	3.13691	3.13691
145681	-0.501639	0.714803	0.387177	0.0466463	0.36652	0.0159565	0.0427618	0.0388753	0.472437	1.05282	145681	Hydrogel	1.82505	0.000133372	1.82505	1.82505	1.82505
501517	-0.500604	0.092994	0.321074	0.0457849	-0.786148	0.290538	0.565278	0.479783	0.798276	1.05282	501517	Hydrogel	8.40036	0.000917891	8.40036	8.40036	8.40036
482589	-0.499091	0.120269	0.414591	0.140368	0.611084	0.68257	0.764445	0.822831	0.830136	0.881985	482589	Hydrogel	1.05219	4.11594e-05	1.05219	1.05219	1.05219
10019708	-0.499074	0.333934	0.336086	0.0741585	1.15569	0.0608786	0.237803	0.598125	0.79514	0.881985	10019708	Anti-EBV	0.987376	3.34268e-05	0.987376	0.987376	0.987376
92229125	-0.499016	0.210354	0.390348	0.0461752	-0.319903	0.0586244	0.308047	0.577582	0.649355	-0.875713	92229125	Anti-EBV	1.37949	8.0211e-05	1.37949	1.37949	1.37949
44451061	-0.499016	0.210354	0.390348	0.0461752	-0.319903	0.0586244	0.308047	0.577582	0.649355	-0.157704	44451061	Hydrogel	1.98761	0.000152768	1.98761	1.98761	1.98761
167798	-0.498789	0.658243	0.397679	0.0949199	-0.773034	0.0134611	0.056758	0.287827	0.661598	0.175405	167798	Hydrogel	4.18354	0.000414771	4.18354	4.18354	4.18354
56851256	-0.497693	0.387545	0.367726	0.0474056	0.713044	0.228763	0.184946	0.154769	0.458302	1.63784	56851256	Hydrogel	1.7873	0.000128868	1.7873	1.7873	1.7873
11097661	-0.497547	0.64182	0.390831	0.098805	0.124036	0.0280829	0.0629169	0.0475416	0.443671	0.13808	11097661	Hydrogel	0.739044	3.79764e-06	0.739044	0.739044	0.739044
296237	-0.495852	0.106977	0.323343	0.0440574	-0.873996	0.015415	0.199713	0.745656	0.50299	0.13808	296237	Hydrogel	3.07782	0.000282844	3.07782	3.07782	3.07782
155905982	-0.495744	0.532935	0.357736	0.108675	-0.272572	0.0140722	0.100617	0.0515102	0.56353	0.224786	155905982	Hydrogel	3.85857	0.000375997	3.85857	3.85857	3.85857
93982611	-0.494933	0.200605	0.37411	0.0888492	-0.503108	0.0631771	0.472488	0.913244	0.801632	0.224786	93982611	Hydrogel	124.995	0.0148291	124.995	124.995	124.995
135415644	-0.493084	0.537383	0.393019	0.145616	-0.426303	0.308	0.163042	0.640902	0.605626	-1.6011	135415644	Anti-EBV	0.792331	1.01555e-05	0.792331	0.792331	0.792331
451554	-0.492962	0.568349	0.389236	0.091091	-1.55434	0.686242	0.384575	0.39015	0.622819	0.617782	451554	Hydrogel	2.18707	0.000176566	2.18707	2.18707	2.18707
122174083	-0.492775	0.09991	0.346409	0.0229312	-0.144796	0.053907	0.146651	0.00877747	0.480568	-0.0912303	122174083	Hydrogel	0.924765	2.59565e-05	0.924765	0.924765	0.924765
45052344	-0.491918	0.22001	0.413841	0.173402	0.597959	0.0641444	0.0331014	0.193439	0.37362	-0.757056	45052344	Anti-EBV	6.52004	0.000693545	6.52004	6.52004	6.52004
495537	-0.488679	0.160038	0.336112	0.0343799	-1.40913	0.811663	0.62256	0.709921	0.706708	-0.757056	495537	Nontox	1.28913	6.94301e-05	1.28913	1.28913	1.28913
44563542	-0.487879	0.38304	0.423337	0.0439398	0.304234	0.0981641	0.391008	0.477123	0.834694	-0.757056	44563542	Anti-EBV	4.8685	0.000496495	4.8685	4.8685	4.8685
21627889	-0.48681	0.319848	0.341141	0.0524817	1.06043	0.230231	0.152711	0.0438481	0.45817	0.228255	21627889	Anti-EBV	2.35289	0.000196351	2.35289	2.35289	2.35289
122129480	-0.486476	0.182617	0.434107	0.115498	0.0929602	0.0128892	0.0502734	0.0934483	0.425139	1.29622	122129480	Hydrogel	3.64378	0.00035037	3.64378	3.64378	3.64378
10105820	-0.486379	0.568233	0.340796	0.225326	-1.07129	0.0279739	0.109879	0.0204665	0.678342	-0.313208	10105820	Hydrogel	1.12578	4.99399e-05	1.12578	1.12578	1.12578
163320923	-0.486109	0.303566	0.405722	0.284863	-0.159868	0.0183547	0.164529	0.0747353	0.495984	-0.584322	163320923	Anti-EBV	5.40404	0.000560392	5.40404	5.40404	5.40404
131851102	-0.485914	0.460287	0.410603	0.061986	0.337639	0.117248	0.36054	0.554277	0.610914	-1.2768	131851102	Anti-EBV	2.1797	0.000175686	2.1797	2.1797	2.1797
135696522	-0.48559	0.767014	0.367284	0.15561	-0.72136	0.0444468	0.301239	0.420414	0.605761	0.445392	135696522	Hydrogel	6.291	0.000666217	6.291	6.291	6.291
136045770	-0.48559	0.767014	0.367284	0.15561	-0.72136	0.0444468	0.301239	0.420414	0.605761	1.42096	136045770	Hydrogel	12.1424	0.00136436	12.1424	12.1424	12.1424
135403914	-0.48559	0.767014	0.367284	0.15561	-0.72136	0.0444468	0.301239	0.420414	0.605761	-0.98777	135403914	Nontox	1.95857	0.000149303	1.95857	1.95857	1.95857
135812388	-0.48559	0.767014	0.367284	0.15561	-0.72136	0.0444468	0.301239	0.420414	0.605761	-1.90337	135812388	Nontox	0.989183	3.36425e-05	0.989183	0.989183	0.989183
135434786	-0.485499	0.429179	0.346135	0.0562871	-0.158195	0.0431081	0.187956	0.206201	0.449318	0.282889	135434786	Hydrogel	2.61283	0.000227364	2.61283	2.61283	2.61283
102063598	-0.484701	0.489832	0.378124	0.0803218	0.896504	0.0133172	0.0663148	0.0323118	0.552052	0.811259	102063598	Anti-EBV	0.800122	1.1085e-05	0.800122	0.800122	0.800122
71340337	-0.483902	0.247373	0.363308	0.117123	-0.317774	0.135073	0.628981	0.240369	0.715183	-1.88016	71340337	Anti-EBV	0.875362	2.00621e-05	0.875362	0.875362	0.875362
451616	-0.483902	0.247373	0.363308	0.117123	-0.317774	0.135073	0.628981	0.240369	0.715183	-1.948	451616	Anti-EBV	0.867567	1.9132e-05	0.867567	0.867567	0.867567
92209628	-0.483836	0.495421	0.399923	0.125431	-0.743517	0.120458	0.0537833	0.0248753	0.530001	1.26978	92209628	Hydrogel	10.2567	0.00113937	10.2567	10.2567	10.2567
7088272	-0.483836	0.495421	0.399923	0.125431	-0.743517	0.120458	0.0537833	0.0248753	0.530001	-0.678874	7088272	Nontox	4.97291	0.000508952	4.97291	4.97291	4.97291
97577	-0.483836	0.495421	0.399923	0.125431	-0.743517	0.120458	0.0537833	0.0248753	0.530001	-0.678874	97577	Nontox	4.97291	0.000508952	4.97291	4.97291	4.97291
152521	-0.483108	0.366111	0.437297	0.116362	0.864578	0.10197	0.260196	0.419733	0.683473	-1.53161	152521	Anti-EBV	2.52482	0.000216864	2.52482	2.52482	2.52482
155903793	-0.48166	0.426646	0.422087	0.0736722	-0.127204	0.0600363	0.621467	0.245596	0.834972	-2.10357	155903793	Anti-EBV	1.01616	3.68617e-05	1.01616	1.01616	1.01616
3000303	-0.480931	0.51139	0.355946	0.433	-1.16003	0.138416	0.774263	0.377579	0.81461	-1.71841	3000303	Nontox	2.42701	0.000205193	2.42701	2.42701	2.42701
3000242	-0.480931	0.51139	0.355946	0.433	-1.16003	0.138416	0.774263	0.377579	0.81461	-0.174491	3000242	Hydrogel	1.34523	7.61236e-05	1.34523	1.34523	1.34523
595375	-0.480787	0.605761	0.394734	0.250551	-0.568686	0.683774	0.374911	0.698824	0.528988	-0.931023	595375	Nontox	1.05014	4.09154e-05	1.05014	1.05014	1.05014
90673985	-0.480733	0.330643	0.39727	0.20217	0.679366	0.159334	0.402048	0.368692	0.825366	-0.931023	90673985	Anti-EBV	4.35046	0.000434686	4.35046	4.35046	4.35046
40506074	-0.480164	0.0546311	0.379022	0.081612	-0.582857	0.00865937	0.0485531	0.0188147	0.370406	-0.931023	40506074	Nontox	1.12419	4.97506e-05	1.12419	1.12419	1.12419
3000824	-0.480164	0.0546311	0.379022	0.081612	-0.582857	0.00865937	0.0485531	0.0188147	0.370406	1.61405	3000824	Hydrogel	29.5429	0.00344047	29.5429	29.5429	29.5429
277822	-0.480164	0.0546311	0.379022		-0.582857	0.00865937	0.0485531	0.0188147	0.370406	1.61405	277822	Hydrogel	29.5429	0.00344047	29.5429	29.5429	29.5429
512178	-0.479876	0.397854	0.363275		-0.222818	0.0926606	0.0770715	0.023589	0.592019	-0.480229	512178	Anti-EBV	990.468	0.118091	990.468	990.468	990.468
356732	-0.479078	0.263159	0.359762	0.0284966	0.110733	0.04842	0.261819	0.461815	0.764098	-1.14197	356732	Anti-EBV	1.96537	0.000150114	1.96537	1.96537	1.96537
167321	-0.479078	0.263159	0.359762	0.0284966	0.110733	0.04842	0.261819	0.461815	0.764098	-1.40798	167321	Anti-EBV	1.60505	0.000107123	1.60505	1.60505	1.60505
22211279	-0.477217	0.552708	0.441641	0.142232	0.37943	0.018438	0.0664994	0.0355777	0.418585	1.02193	22211279	Hydrogel	1.76777	0.000126537	1.76777	1.76777	1.76777
124430633	-0.47689	0.312914	0.433584	0.037684	-0.0703624	0.106076	0.137981	0.243272	0.751063	-0.764671	124430633	Anti-EBV	2.70473	0.000238329	2.70473	2.70473	2.70473
124430634	-0.47689	0.312914	0.433584	0.037684	-0.0703624	0.106076	0.137981	0.243272	0.751063	0.851847	124430634	Hydrogel	3.91512	0.000382744	3.91512	3.91512	3.91512
135504147	-0.476672	0.62696	0.418166	0.191122	-0.979881	0.748623	0.326828	0.659248	0.649457	0.851847	135504147	Hydrogel	4.44063	0.000445445	4.44063	4.44063	4.44063
175972	-0.476657	0.387975	0.385843	0.25854	-0.0043657	0.0292703	0.50902	0.43208	0.807001	-0.0114285	175972	Anti-EBV	0.728554	2.54608e-06	0.728554	0.728554	0.728554
15289164	-0.475491	0.943076	0.409373	0.488515	2.94723	0.373873	0.60084	0.859797	0.754658	0.658026	15289164	Anti-EBV	3.56316	0.00034075	3.56316	3.56316	3.56316
72212336	-0.475491	0.943076	0.409373	0.488515	2.94723	0.373873	0.60084	0.859797	0.754658	-0.676984	72212336	Anti-EBV	24.7284	0.00286603	24.7284	24.7284	24.7284
11807674	-0.475205	0.425739	0.41349	0.0770335	-0.142908	0.056644	0.615522	0.260623	0.835546	-1.75275	11807674	Anti-EBV	1.07494	4.38745e-05	1.07494	1.07494	1.07494
70889269	-0.473942	0.4212	0.388745	0.0770335	-0.172557	0.0593953	0.646955	0.255455	0.835983	-0.472782	70889269	Anti-EBV	362.266	0.0431386	362.266	362.266	362.266
644174	-0.473942	0.4212	0.388745	0.0770335	-0.172557	0.0593953	0.646955	0.255455	0.835983	0.425042	644174	Hydrogel	3.51111	0.00033454	3.51111	3.51111	3.51111
6560357	-0.473942	0.4212	0.388745	0.0770335	-0.172557	0.0593953	0.646955	0.255455	0.835983	-0.602604	6560357	Anti-EBV	4.0194	0.000395186	4.0194	4.0194	4.0194
638036	-0.473942	0.4212	0.388745	0.0770335	-0.172557	0.0593953	0.646955	0.255455	0.835983	-1.45618	638036	Anti-EBV	1.14102	5.17588e-05	1.14102	1.14102	1.14102
10890867	-0.473942	0.423231	0.388907	0.0770335	-0.138134	0.0593953	0.659307	0.252656	0.83626	-0.251343	10890867	Anti-EBV	1.42625	8.57904e-05	1.42625	1.42625	1.42625
5702004	-0.473942	0.4212	0.388745	0.0770335	-0.172557	0.0593953	0.646955	0.255455	0.835983	-0.571715	5702004	Anti-EBV	5.06571	0.000520024	5.06571	5.06571	5.06571
6420052	-0.473942	0.4212	0.388745	0.0770335	-0.172557	0.0593953	0.646955	0.255455	0.835983	-0.863052	6420052	Anti-EBV	1.80242	0.000130672	1.80242	1.80242	1.80242
447916	-0.473942	0.4212	0.388745	0.0770335	-0.172557	0.0593953	0.646955	0.255455	0.835983	-0.863052	447916	Anti-EBV	1.80242	0.000130672	1.80242	1.80242	1.80242
121486812	-0.473942	0.423454	0.388719	0.0770335	-0.138134	0.0629414	0.659307	0.252656	0.83626	1.61279	121486812	Hydrogel	8.08056	0.000879734	8.08056	8.08056	8.08056
12358320	-0.473942	0.4212	0.388745	0.0770335	-0.172557	0.0593953	0.646955	0.255455	0.835983	-1.62323	12358320	Anti-EBV	1.07795	4.42337e-05	1.07795	1.07795	1.07795
12358321	-0.473942	0.423073	0.38855	0.0770335	-0.172557	0.056644	0.646955	0.255455	0.83626	0.896091	12358321	Hydrogel	5.72135	0.00059825	5.72135	5.72135	5.72135
12358325	-0.473942	0.423721	0.388719	0.0770335	-0.138134	0.0629414	0.659307	0.252656	0.83626	-2.19605	12358325	Anti-EBV	0.982869	3.28891e-05	0.982869	0.982869	0.982869
453548	-0.473942	0.4212	0.388745	0.0770335	-0.172557	0.0593953	0.646955	0.255455	0.835983	-0.249442	453548	Anti-EBV	1.19135	5.77641e-05	1.19135	1.19135	1.19135
448378	-0.473942	0.4212	0.388745	0.0770335	-0.172557	0.0593953	0.646955	0.255455	0.835983	-0.471439	448378	Anti-EBV	168.593	0.0200309	168.593	168.593	168.593
53384930	-0.473942	0.4212	0.388745	0.0770335	-0.172557	0.0593953	0.646955	0.255455	0.835983	-0.504445	53384930	Anti-EBV	14.6736	0.00166636	14.6736	14.6736	14.6736
54732806	-0.473942	0.4212	0.388745	0.0770335	-0.172557	0.0593953	0.646955	0.255455	0.835983	-0.539874	54732806	Anti-EBV	7.17013	0.000771109	7.17013	7.17013	7.17013
7040251	-0.473942	0.4212	0.388745	0.0770335	-0.172557	0.0593953	0.646955	0.255455	0.835983	-0.0982286	7040251	Hydrogel	1.05584	4.15951e-05	1.05584	1.05584	1.05584
23279550	-0.473942	0.427237	0.411543	0.0770335	-0.110869	0.0593953	0.634207	0.256424	0.8361	1.91819	23279550	Hydrogel	8.61022	0.000942929	8.61022	8.61022	8.61022
139025871	-0.473942	0.424856	0.388357	0.0770335	-0.172557	0.0600363	0.645492	0.25477	0.836543	0.846481	139025871	Hydrogel	5.48857	0.000570477	5.48857	5.48857	5.48857
12358322	-0.473942	0.42319	0.388753	0.0770335	-0.172557	0.056644	0.646955	0.257604	0.83626	-1.82662	12358322	Anti-EBV	1.02219	3.75807e-05	1.02219	1.02219	1.02219
160739	-0.473942	0.4212	0.388745	0.0770335	-0.172557	0.0593953	0.646955	0.255455	0.835983	0.0834886	160739	Hydrogel	1.90848	0.000143327	1.90848	1.90848	1.90848
122130566	-0.472775	0.412427	0.403383	0.0561445	-0.530006	0.0843197	0.193066	0.309144	0.504642	-2.37814	122130566	Nontox	0.750895	5.21162e-06	0.750895	0.750895	0.750895
54432316	-0.471739	0.942006	0.46569		0.730445	0.0389842	0.0912939	0.0825493	0.339866	0.66601	54432316	Anti-EBV	0.787189	9.542e-06	0.787189	0.787189	0.787189
3034648	-0.471723	0.532511	0.401761	0.123271	-0.348992	0.245571	0.417185	0.535422	0.661845	-0.516107	3034648	Anti-EBV	4.61615	0.000466386	4.61615	4.61615	4.61615
3034638	-0.471723	0.532511	0.401761	0.123271	-0.348992	0.245571	0.417185	0.535422	0.661845	0.0850745	3034638	Hydrogel	5.70818	0.000596679	5.70818	5.70818	5.70818
10923602	-0.471511	0.427429	0.442932	0.0770335	-0.0733657	0.0629414	0.626988	0.260395	0.835121	-0.272137	10923602	Anti-EBV	2.11689	0.000168193	2.11689	2.11689	2.11689
10492175	-0.471511	0.42657	0.433845	0.0770335	-0.127058	0.0593953	0.629516	0.258645	0.835127	-0.272137	10492175	Anti-EBV	1.73607	0.000122756	1.73607	1.73607	1.73607
71442564	-0.471509	0.568179	0.380428	0.119204	-1.31351	0.0233347	0.344425	0.751792	0.696152	-0.272137	71442564	Hydrogel	1.04195	3.99383e-05	1.04195	1.04195	1.04195
11311566	-0.470513	0.474736	0.361915	0.0549327	-0.229918	0.0462674	0.0975538	0.0588169	0.377626	-0.272137	11311566	Anti-EBV	1.00801	3.58889e-05	1.00801	1.00801	1.00801
452612	-0.470277	0.0734019	0.275604	0.00913218	-0.517899	0.426254	0.476822	0.485968	0.539577	-1.50859	452612	Nontox	0.775077	8.09683e-06	0.775077	0.775077	0.775077
126283	-0.47021	0.206462	0.361369	0.118488	-0.0585841	0.242297	0.0775127	0.0240394	0.546581	1.36101	126283	Hydrogel	5.5842	0.000581886	5.5842	5.5842	5.5842
459903	-0.47021	0.206462	0.361369	0.118488	-0.0585841	0.242297	0.0775127	0.0240394	0.546581	-0.117135	459903	Anti-EBV	0.941592	2.79642e-05	0.941592	0.941592	0.941592
135410302	-0.469996	0.643524	0.373942	0.414724	-0.972025	0.0527346	0.129909	0.457144	0.553391	-0.117135	135410302	Hydrogel	1.70107	0.000118579	1.70107	1.70107	1.70107
14464884	-0.468852	0.440918	0.412084	0.139622	-0.846919	0.17768	0.199711	0.399435	0.55761	-1.32886	14464884	Nontox	1.81646	0.000132348	1.81646	1.81646	1.81646
259345	-0.466233	0.249516	0.422817	0.207665	-0.0694762	0.0181452	0.479573	0.465431	0.600453	-1.32886	259345	Anti-EBV	1.35754	7.75921e-05	1.35754	1.35754	1.35754
511763	-0.465864	0.36418	0.340751	0.187283	-1.0816	0.10548	0.355447	0.483348	0.598635	-1.32886	511763	Nontox	4.22856	0.000420141	4.22856	4.22856	4.22856
51414401	-0.465	0.410423	0.426071	0.0563688	-1.72619	0.149045	0.539153	0.163349	0.529018	0.552616	51414401	Hydrogel	1.84817	0.000136131	1.84817	1.84817	1.84817
146108	-0.465	0.410423	0.426071	0.0563688	-1.72619	0.149045	0.539153	0.163349	0.529018	0.175405	146108	Hydrogel	1.4252	8.56647e-05	1.4252	1.4252	1.4252
13831291	-0.465	0.410423	0.426071	0.0563688	-1.72619	0.149045	0.539153	0.163349	0.529018	-1.79148	13831291	Nontox	28.0178	0.0032585	28.0178	28.0178	28.0178
22884229	-0.464961	0.336937	0.396102	0.0945728	-0.0380416	0.021391	0.106831	0.0531819	0.322825	-1.79148	22884229	Anti-EBV	1.16224	5.42899e-05	1.16224	1.16224	1.16224
15955633	-0.464836	0.687775	0.379389	0.152182	-0.298631	0.107013	0.380665	0.575847	0.767988	-0.828206	15955633	Anti-EBV	1.35391	7.71593e-05	1.35391	1.35391	1.35391
121219141	-0.464836	0.687775	0.379389	0.152182	-0.298631	0.107013	0.380665	0.575847	0.767988	0.214903	121219141	Hydrogel	5.07626	0.000521283	5.07626	5.07626	5.07626
15410715	-0.46147	0.142338	0.297051	0.0467675	-0.181074	0.118772	0.560825	0.695216	0.355347	-0.0924681	15410715	Hydrogel	1.15394	5.33006e-05	1.15394	1.15394	1.15394
11346304	-0.461316	0.737793	0.359922	0.0723574	-0.0593802	0.0807174	0.0965864	0.0792026	0.472271	-0.0924681	11346304	Anti-EBV	0.833939	1.51198e-05	0.833939	0.833939	0.833939
21580289	-0.460253	0.425712	0.42199	0.0770335	-0.145441	0.056644	0.609989	0.267533	0.83662	-0.0924681	21580289	Hydrogel	0.945033	2.83748e-05	0.945033	0.945033	0.945033
135627705	-0.45989	0.710358	0.390178	0.114364	0.436986	0.157961	0.180838	0.286036	0.595043	0.181426	135627705	Anti-EBV	1.27063	6.7223e-05	1.27063	1.27063	1.27063
136062166	-0.45989	0.710358	0.390178	0.114364	0.436986	0.157961	0.180838	0.286036	0.595043	-0.177691	136062166	Anti-EBV	3.7873	0.000367494	3.7873	3.7873	3.7873
135933068	-0.45989	0.710358	0.390178	0.114364	0.436986	0.157961	0.180838	0.286036	0.595043	-0.177691	135933068	Anti-EBV	3.7873	0.000367494	3.7873	3.7873	3.7873
135622951	-0.45989	0.710358	0.390178	0.114364	0.436986	0.157961	0.180838	0.286036	0.595043	1.11707	135622951	Hydrogel	1.77945	0.000127931	1.77945	1.77945	1.77945
136826947	-0.45989	0.710358	0.390178	0.114364	0.436986	0.157961	0.180838	0.286036	0.595043	0.873395	136826947	Hydrogel	1.39522	8.20881e-05	1.39522	1.39522	1.39522
136065188	-0.45989	0.710358	0.390178	0.114364	0.436986	0.157961	0.180838	0.286036	0.595043	0.873395	136065188	Hydrogel	1.39522	8.20881e-05	1.39522	1.39522	1.39522
54518623	-0.459613	0.537344	0.411089	0.174477	0.931175	0.129289	0.349453	0.560506	0.826759	-0.801581	54518623	Anti-EBV	6.45846	0.000686198	6.45846	6.45846	6.45846
2729604	-0.45935	0.395891	0.380969	0.0936696	0.0152405	0.0226302	0.0797237	0.0135744	0.529317	-2.3077	2729604	Anti-EBV	1.07022	4.33111e-05	1.07022	1.07022	1.07022
94196	-0.45935	0.395891	0.380969	0.0936696	0.0152405	0.0226302	0.0797237	0.0135744	0.529317	-0.502199	94196	Anti-EBV	16.3657	0.00186826	16.3657	16.3657	16.3657
7059462	-0.45935	0.395891	0.380969	0.0936696	0.0152405	0.0226302	0.0797237	0.0135744	0.529317	-0.994381	7059462	Anti-EBV	1.96151	0.000149654	1.96151	1.96151	1.96151
7195995	-0.45935	0.395891	0.380969	0.0936696	0.0152405	0.0226302	0.0797237	0.0135744	0.529317	-0.994381	7195995	Anti-EBV	1.96151	0.000149654	1.96151	1.96151	1.96151
68206315	-0.45935	0.395891	0.380969	0.0936696	0.0152405	0.0226302	0.0797237	0.0135744	0.529317	0.175405	68206315	Hydrogel	1.18434	5.69271e-05	1.18434	1.18434	1.18434
1263225	-0.45935	0.395891	0.380969	0.0936696	0.0152405	0.0226302	0.0797237	0.0135744	0.529317	0.175405	1263225	Hydrogel	1.18434	5.69271e-05	1.18434	1.18434	1.18434
27661670	-0.45935	0.395891	0.380969	0.0936696	0.0152405	0.0226302	0.0797237	0.0135744	0.529317	0.175405	27661670	Hydrogel	1.18434	5.69271e-05	1.18434	1.18434	1.18434
9992804	-0.45855	0.791733	0.410196	0.134999	0.379914	0.0526976	0.0971911	0.0190289	0.593128	0.175405	9992804	Anti-EBV	1.16329	5.44161e-05	1.16329	1.16329	1.16329
6536767	-0.456883	0.362381	0.331911		0.239465	0.240614	0.502572	0.473469	0.671269	0.175405	6536767	Anti-EBV	0.850367	1.70799e-05	0.850367	0.850367	0.850367
5273934	-0.456883	0.362381	0.331911	0.0987198	0.239465	0.240614	0.502572	0.473469	0.671269	0.175405	5273934	Anti-EBV	0.850367	1.70799e-05	0.850367	0.850367	0.850367
21854434	-0.456851	0.484509	0.41844	0.0300516	0.219706	0.0898617	0.377185	0.729926	0.820066	0.175405	21854434	Anti-EBV	0.806179	1.18077e-05	0.806179	0.806179	0.806179
161583	-0.456354	0.400093	0.407139	0.140732	0.360203	0.00975376	0.153643	0.056338	0.549574	0.175405	161583	Anti-EBV	1.12076	4.9341e-05	1.12076	1.12076	1.12076
9992648	-0.453417	0.541768	0.439588	0.148743	0.0551511	0.210549	0.148178	0.0741411	0.628763	0.175405	9992648	Hydrogel	1.04148	3.98818e-05	1.04148	1.04148	1.04148
7269451	-0.453417	0.541768	0.439588	0.148743	0.0551511	0.210549	0.148178	0.0741411	0.628763	0.175405	7269451	Hydrogel	1.04148	3.98818e-05	1.04148	1.04148	1.04148
13887579	-0.453417	0.541768	0.439588	0.148743	0.0551511	0.210549	0.148178	0.0741411	0.628763	0.175405	13887579	Hydrogel	1.04148	3.98818e-05	1.04148	1.04148	1.04148
107643	-0.453417	0.541768	0.439588	0.148743	0.0551511	0.210549	0.148178	0.0741411	0.628763	0.175405	107643	Hydrogel	1.04148	3.98818e-05	1.04148	1.04148	1.04148
92132277	-0.453417	0.541768	0.439588	0.148743	0.0551511	0.210549	0.148178	0.0741411	0.628763	0.175405	92132277	Hydrogel	1.04148	3.98818e-05	1.04148	1.04148	1.04148
21825596	-0.453216	0.385251	0.307575	0.193312	-0.308014	0.0247291	0.107432	0.058819	0.620948	0.175405	21825596	Hydrogel	5.41489	0.000561686	5.41489	5.41489	5.41489
87825371	-0.452446	0.0974434	0.357666	0.0337463	0.329162	0.0420509	0.258579	0.53804	0.553868	0.175405	87825371	Anti-EBV	1.05342	4.13061e-05	1.05342	1.05342	1.05342
90663906	-0.45235	0.934308	0.426201	0.225854	0.359593	0.0310439	0.126958	0.123232	0.442103	0.175405	90663906	Anti-EBV	1.12202	4.94917e-05	1.12202	1.12202	1.12202
512134	-0.450672	0.786198	0.424115	0.0843631	0.652375	0.0397413	0.561652	0.457581	0.838047	0.175405	512134	Anti-EBV	1.78447	0.00012853	1.78447	1.78447	1.78447
92264929	-0.450672	0.786198	0.424115	0.0843631	0.652375	0.0397413	0.561652	0.457581	0.838047	0.175405	92264929	Anti-EBV	1.78447	0.00012853	1.78447	1.78447	1.78447
333596	-0.450672	0.786198	0.424115	0.0843631	0.652375	0.0397413	0.561652	0.457581	0.838047	0.175405	333596	Anti-EBV	1.78447	0.00012853	1.78447	1.78447	1.78447
98581	-0.450064	0.670631	0.315618	0.169016	0.0427105	0.010814	0.0777554	0.0299044	0.528248	0.175405	98581	Hydrogel	1.0879	4.54201e-05	1.0879	1.0879	1.0879
481523	-0.449493	0.81265	0.375394	0.417089	1.52678	0.430889	0.222738	0.360381	0.553895	0.175405	481523	Anti-EBV	3.76534	0.000364874	3.76534	3.76534	3.76534
3005947	-0.449297	0.463507	0.323716	0.116082	0.507025	0.507054	0.155553	0.0463297	0.435095	0.175405	3005947	Anti-EBV	1.4578	8.95545e-05	1.4578	1.4578	1.4578
3006523	-0.449037	0.924894	0.44361	0.305621	0.848147	0.0331984	0.113778	0.396352	0.466178	0.175405	3006523	Anti-EBV	2.23066	0.000181766	2.23066	2.23066	2.23066
3006522	-0.449037	0.924894	0.44361	0.305621	0.848147	0.0331984	0.113778	0.396352	0.466178	0.175405	3006522	Anti-EBV	2.23066	0.000181766	2.23066	2.23066	2.23066
21139907	-0.447689	0.261063	0.415997	0.0946867	-0.224758	0.0311415	0.542717	0.391679	0.83618	0.497699	21139907	Hydrogel	5.28985	0.000546767	5.28985	5.28985	5.28985
13833767	-0.447689	0.261063	0.415997	0.0946867	-0.224758	0.0311415	0.542717	0.391679	0.83618	0.955947	13833767	Hydrogel	8.19667	0.000893588	8.19667	8.19667	8.19667
259853	-0.447689	0.261063	0.415997	0.0946867	-0.224758	0.0311415	0.542717	0.391679	0.83618	-1.40648	259853	Anti-EBV	1.03591	3.92179e-05	1.03591	1.03591	1.03591
121487089	-0.447229	0.921901	0.455022	0.0476528	0.72515	0.241144	0.213192	0.183058	0.442676	-1.40648	121487089	Anti-EBV	2.4355	0.000206206	2.4355	2.4355	2.4355
21456083	-0.444342	0.235263	0.336292	0.119164	0.446218	0.239046	0.243944	0.072194	0.579185	0.175405	21456083	Anti-EBV	1.32505	7.37156e-05	1.32505	1.32505	1.32505
3005950	-0.444342	0.235263	0.336292	0.119164	0.446218	0.239046	0.243944	0.072194	0.579185	0.175405	3005950	Anti-EBV	1.32505	7.37156e-05	1.32505	1.32505	1.32505
10377839	-0.441913	0.575627	0.431836	0.186825	-0.26204	0.0718662	0.104558	0.0648749	0.708497	-0.433248	10377839	Anti-EBV	28.6013	0.00332812	28.6013	28.6013	28.6013
197020	-0.441913	0.575627	0.431836	0.186825	-0.26204	0.0718662	0.104558	0.0648749	0.708497	-0.184543	197020	Hydrogel	1.3163	7.26721e-05	1.3163	1.3163	1.3163
76282776	-0.441673	0.331685	0.431419	0.239342	-0.161028	0.114171	0.153332	0.470197	0.473615	-1.64659	76282776	Anti-EBV	1.03649	3.92864e-05	1.03649	1.03649	1.03649
161746	-0.440678	0.418349	0.406866	0.0859539	0.277031	0.0094069	0.0932276	0.0290792	0.518436	-1.97806	161746	Anti-EBV	1.3673	7.8757e-05	1.3673	1.3673	1.3673
131883911	-0.440661	0.427112	0.41932	0.0770335	-0.145441	0.0593953	0.611511	0.26533	0.836936	-1.97806	131883911	Anti-EBV	0.978663	3.23872e-05	0.978663	0.978663	0.978663
131883912	-0.440661	0.428543	0.420373	0.0770335	-0.145441	0.056644	0.609989	0.264078	0.836936	0.24255	131883912	Hydrogel	2.56561	0.00022173	2.56561	2.56561	2.56561
478560	-0.440375	0.589159	0.428481	0.0386933	-0.536828	0.331895	0.434689	0.199202	0.67317	1.89956	478560	Hydrogel	35.0106	0.00409283	35.0106	35.0106	35.0106
131878904	-0.438877	0.809747	0.41734	0.0807833	-1.286	0.0513764	0.492528	0.336696	0.632614	0.289117	131878904	Hydrogel	1.92241	0.000144988	1.92241	1.92241	1.92241
258357	-0.438877	0.809747	0.41734		-1.286	0.0513764	0.492528	0.336696	0.632614	-0.574609	258357	Nontox	0.976915	3.21787e-05	0.976915	0.976915	0.976915
23541118	-0.438362	0.672889	0.390025	0.187656	0.806253	0.0219542	0.0419395	0.0545772	0.367135	-0.352758	23541118	Anti-EBV	19.851	0.0022841	19.851	19.851	19.851
154705590	-0.437218	0.474864	0.411067	0.266641	0.463705	0.467319	0.387699	0.262581	0.607919	-1.00594	154705590	Anti-EBV	2.94733	0.000267274	2.94733	2.94733	2.94733
57349456	-0.436583	0.553462	0.39423	0.0666084	1.34616	0.381149	0.625693	0.526784	0.819455	-1.00594	57349456	Anti-EBV	5.13513	0.000528307	5.13513	5.13513	5.13513
23519664	-0.435656	0.715881	0.431633	0.302603	0.923798	0.3093	0.081359	0.0388907	0.593361	-1.00594	23519664	Anti-EBV	4.07826	0.000402209	4.07826	4.07826	4.07826
131876227	-0.435247	0.127724	0.4029	0.152433	0.488058	0.0629389	0.21635	0.00892296	0.451514	1.2356	131876227	Hydrogel	1.85208	0.000136597	1.85208	1.85208	1.85208
102129315	-0.434288	0.120376	0.387934	0.0449046	-1.3486	0.00661781	0.419411	0.120461	0.431147	-1.80852	102129315	Nontox	3.51845	0.000335416	3.51845	3.51845	3.51845
101658091	-0.432882	0.147721	0.367585	0.201233	0.141794	0.00522352	0.057813	0.0859795	0.410546	-1.80852	101658091	Anti-EBV	1.29788	7.04745e-05	1.29788	1.29788	1.29788
23253577	-0.432739	0.668652	0.353208	0.109994	0.407857	0.0302775	0.404571	0.843357	0.797642	-0.760209	23253577	Anti-EBV	4.33711	0.000433093	4.33711	4.33711	4.33711
135538696	-0.429981	0.686526	0.398722	0.199946	-0.127296	0.61523	0.117077	0.606942	0.603922	-0.760209	135538696	Anti-EBV	2.00328	0.000154637	2.00328	2.00328	2.00328
259661	-0.429149	0.247386	0.323468	0.0774182	-1.49359	0.272447	0.226333	0.588196	0.633935	-2.04092	259661	Nontox	3.45738	0.00032813	3.45738	3.45738	3.45738
44304177	-0.428978	0.424598	0.401637	0.37054	-0.094565	0.00782455	0.117253	0.269546	0.43899	1.29998	44304177	Hydrogel	6.60426	0.000703593	6.60426	6.60426	6.60426
10424703	-0.428923	0.599391	0.354723	0.113843	-0.510907	0.205257	0.362958	0.725476	0.767456	0.175405	10424703	Hydrogel	11.1298	0.00124355	11.1298	11.1298	11.1298
5289205	-0.427879	0.419618	0.435826	0.0858026	0.415192	0.0671256	0.138249	0.106989	0.680617	-0.494165	5289205	Anti-EBV	18.69	0.00214558	18.69	18.69	18.69
134693185	-0.427131	0.753932	0.385714	0.0735841	1.31089	0.207926	0.160485	0.227686	0.598517	0.173118	134693185	Anti-EBV	3.38767	0.000319812	3.38767	3.38767	3.38767
12873547	-0.427131	0.753932	0.385714	0.0735841	1.31089	0.207926	0.160485	0.227686	0.598517	0.173118	12873547	Anti-EBV	3.38767	0.000319812	3.38767	3.38767	3.38767
6451965	-0.427131	0.753932	0.385714	0.0735841	1.31089	0.207926	0.160485	0.227686	0.598517	0.173118	6451965	Anti-EBV	3.38767	0.000319812	3.38767	3.38767	3.38767
92132221	-0.427131	0.753932	0.385714	0.0735841	1.31089	0.207926	0.160485	0.227686	0.598517	0.173118	92132221	Anti-EBV	3.38767	0.000319812	3.38767	3.38767	3.38767
149094	-0.426611	0.533968	0.451758	0.152528	0.530325	0.107059	0.114082	0.0771013	0.605352	0.173118	149094	Anti-EBV	1.5494	0.000100483	1.5494	1.5494	1.5494
21824453	-0.42655	0.700408	0.348615	0.0791964	-0.0572573	0.0926714	0.161142	0.0181392	0.507901	0.173118	21824453	Hydrogel	1.58927	0.000105241	1.58927	1.58927	1.58927
21732373	-0.425596	0.573445	0.354677	0.0698548	-0.315303	0.0271818	0.118268	0.0124344	0.428685	-0.069242	21732373	Hydrogel	3.86168	0.000376368	3.86168	3.86168	3.86168
162367440	-0.425596	0.573445	0.354677	0.0698548	-0.315303	0.0271818	0.118268	0.0124344	0.428685	1.5651	162367440	Hydrogel	24.815	0.00287636	24.815	24.815	24.815
21856228	-0.425596	0.573445	0.354677	0.0698548	-0.315303	0.0271818	0.118268	0.0124344	0.428685	1.5651	21856228	Hydrogel	24.815	0.00287636	24.815	24.815	24.815
515221	-0.424151	0.470604	0.420471	0.157178	0.223563	0.0522565	0.42752	0.34575	0.858421	1.5651	515221	Hydrogel	3.63612	0.000349456	3.63612	3.63612	3.63612
13871052	-0.423527	0.383808	0.396995	0.236272	-1.79532	0.202242	0.254291	0.26171	0.46522	1.5651	13871052	Hydrogel	2.75719	0.000244588	2.75719	2.75719	2.75719
156588731	-0.423366	0.568937	0.365186	0.119564	-0.576441	0.0562315	0.0706684	0.314562	0.491396	1.5651	156588731	Hydrogel	19.0762	0.00219166	19.0762	19.0762	19.0762
135542427	-0.423251	0.756527	0.408742	0.113695	-0.47947	0.195408	0.150725	0.577495	0.64145	1.5651	135542427	Hydrogel	50.7122	0.00596623	50.7122	50.7122	50.7122
3035490	-0.422907	0.768308	0.384086	0.175776	-0.0915641	0.710894	0.170641	0.296219	0.600733	1.5651	3035490	Hydrogel	7.7776	0.000843588	7.7776	7.7776	7.7776
121487046	-0.422858	0.257909	0.366945	0.37109	-0.381267	0.0686495	0.217241	0.146182	0.528922	1.1996	121487046	Hydrogel	54.4428	0.00641134	54.4428	54.4428	54.4428
14428908	-0.422756	0.369435	0.399195	0.128015	-0.0486572	0.139604	0.184516	0.0362437	0.53176	-1.58098	14428908	Anti-EBV	1.16387	5.44854e-05	1.16387	1.16387	1.16387
3000770	-0.4214	0.491223	0.364087		1.55625	0.0230591	0.0420897	0.0050197	0.322553	-1.58098	3000770	Anti-EBV	3.11899	0.000287756	3.11899	3.11899	3.11899
158379	-0.419882	0.782588	0.405512	0.110718	-1.06822	0.222657	0.428557	0.247187	0.703836	-1.27554	158379	Nontox	5.12939	0.000527622	5.12939	5.12939	5.12939
122130879	-0.419375	0.690688	0.375802	0.110442	-0.905341	0.136904	0.0844749	0.260298	0.479575	-0.081156	122130879	Hydrogel	1.69131	0.000117415	1.69131	1.69131	1.69131
14581958	-0.419192	0.779354	0.427622	0.0635102	-2.38866	0.0944414	0.38314	0.0986193	0.42952	-0.248129	14581958	Hydrogel	0.829936	1.46422e-05	0.829936	0.829936	0.829936
371485	-0.418083	0.382572	0.321325	0.0307866	-1.40565	0.174214	0.594424	0.814841	0.685246	-0.248129	371485	Hydrogel	0.95047	2.90235e-05	0.95047	0.95047	0.95047
21140199	-0.418029	0.477043	0.431166	0.122151	0.125088	0.18799	0.437535	0.432576	0.756784	-0.745424	21140199	Anti-EBV	3.05302	0.000279885	3.05302	3.05302	3.05302
10849624	-0.415196	0.283637	0.424507	0.190621	-0.0793132	0.131016	0.0606465	0.044854	0.423809	-0.745424	10849624	Anti-EBV	2.14544	0.000171599	2.14544	2.14544	2.14544
539847	-0.415171	0.545434	0.416031	0.113783	-0.0524151	0.00844463	0.163507	0.229703	0.56663	-0.745424	539847	Anti-EBV	2.26041	0.000185316	2.26041	2.26041	2.26041
10538309	-0.414747	0.545803	0.359583	0.133739	-0.570817	0.0226355	0.162247	0.0282426	0.683866	-0.745424	10538309	Nontox	1.97104	0.00015079	1.97104	1.97104	1.97104
90673796	-0.414363	0.313364	0.405927	0.131194	0.297815	0.454268	0.117864	0.0854949	0.476911	-0.745424	90673796	Anti-EBV	3.74921	0.000362949	3.74921	3.74921	3.74921
10807167	-0.414277	0.144267	0.389969	0.0430294	0.0857967	0.0501311	0.303744	0.534523	0.681363	0.227107	10807167	Hydrogel	1.1067	4.76639e-05	1.1067	1.1067	1.1067
54471624	-0.413808	0.309542	0.42223	0.283664	1.10931	0.0573039	0.48061	0.804016	0.855043	-2.38429	54471624	Anti-EBV	1.80023	0.000130411	1.80023	1.80023	1.80023
3010090	-0.411205	0.650719	0.347019		2.32729	0.033227	0.119734	0.00760071	0.433853	0.888302	3010090	Anti-EBV	2.27309	0.000186829	2.27309	2.27309	2.27309
688097	-0.411039	0.213273	0.343727	0.0262594	-0.977093	0.0124694	0.29008	0.679515	0.763577	1.00148	688097	Hydrogel	4.23601	0.00042103	4.23601	4.23601	4.23601
439176	-0.411039	0.213273	0.343727	0.0262594	-0.977093	0.0124694	0.29008	0.679515	0.763577	1.00148	439176	Hydrogel	4.23601	0.00042103	4.23601	4.23601	4.23601
58108938	-0.411039	0.213273	0.343727	0.0262594	-0.977093	0.0124694	0.29008	0.679515	0.763577	1.00148	58108938	Hydrogel	4.23601	0.00042103	4.23601	4.23601	4.23601
149	-0.411039	0.213273	0.343727	0.0262594	-0.977093	0.0124694	0.29008	0.679515	0.763577	1.02193	149	Hydrogel	4.2871	0.000427126	4.2871	4.2871	4.2871
99302	-0.411039	0.213273	0.343727	0.0262594	-0.977093	0.0124694	0.29008	0.679515	0.763577	-0.847467	99302	Nontox	5.4679	0.000568011	5.4679	5.4679	5.4679
102122294	-0.409803	0.582721	0.333354	0.0215847	-0.67738	0.140993	0.233503	0.814485	0.574856	-0.88323	102122294	Nontox	2.54523	0.000219298	2.54523	2.54523	2.54523
453194	-0.409701	0.183959	0.352367	0.129898	1.08312	0.0519388	0.477378	0.91377	0.590511	0.714785	453194	Anti-EBV	1.17033	5.52561e-05	1.17033	1.17033	1.17033
453193	-0.409701	0.183959	0.352367	0.129898	1.08312	0.0519388	0.477378	0.91377	0.590511	0.714785	453193	Anti-EBV	1.17033	5.52561e-05	1.17033	1.17033	1.17033
69762616	-0.408573	0.194105	0.413039	0.113619	0.0205609	0.361323	0.399786	0.467344	0.775349	0.0335111	69762616	Hydrogel	0.74976	5.07615e-06	0.74976	0.74976	0.74976
12777828	-0.407361	0.282651	0.39454	0.0201005	-1.73279	0.575866	0.140801	0.714217	0.316941	0.0335111	12777828	Hydrogel	1.1775	5.61108e-05	1.1775	1.1775	1.1775
21854431	-0.40722	0.437438	0.441005	0.0986438	-0.162904	0.25181	0.524916	0.66849	0.860699	0.0335111	21854431	Hydrogel	1.84394	0.000135626	1.84394	1.84394	1.84394
11174347	-0.406265	0.579915	0.41279	0.0769907	0.651384	0.199688	0.445427	0.474914	0.714039	-0.71126	11174347	Anti-EBV	5.611	0.000585085	5.611	5.611	5.611
513716	-0.40519	0.0883745	0.307029	0.0208525	-0.27223	0.177432	0.497824	0.40653	0.706777	-0.9809	513716	Anti-EBV	1.03369	3.89531e-05	1.03369	1.03369	1.03369
101190254	-0.404186	0.536139	0.394663	0.0448693	0.0448091	0.0128531	0.0272806	0.0181415	0.307012	-0.9809	101190254	Anti-EBV	1.80809	0.000131348	1.80809	1.80809	1.80809
512139	-0.403468	0.930273	0.416404	0.0922983	0.386511	0.00781552	0.239572	0.201734	0.684425	0.0182571	512139	Anti-EBV	1.94194	0.000147319	1.94194	1.94194	1.94194
21120714	-0.402877	0.620876	0.390494		-0.105384	0.189296	0.074156	0.0316474	0.480629	0.0182571	21120714	Hydrogel	1.2948	7.01069e-05	1.2948	1.2948	1.2948
126501	-0.402877	0.620876	0.390494	0.5069	-0.105384	0.189296	0.074156	0.0316474	0.480629	-0.335911	126501	Anti-EBV	5.5743	0.000580706	5.5743	5.5743	5.5743
56627067	-0.402668	0.283494	0.399592	0.0983278	-0.350172	0.102444	0.555492	0.467854	0.818495	-0.335911	56627067	Hydrogel	1.09098	4.57886e-05	1.09098	1.09098	1.09098
50989564	-0.402668	0.283494	0.399592	0.0983278	-0.350172	0.102444	0.555492	0.467854	0.818495	-0.871073	50989564	Anti-EBV	0.865577	1.88946e-05	0.865577	0.865577	0.865577
15612716	-0.402668	0.283494	0.399592	0.0983278	-0.350172	0.102444	0.555492	0.467854	0.818495	1.27376	15612716	Hydrogel	44.443	0.00521824	44.443	44.443	44.443
53763859	-0.402668	0.283494	0.399592	0.0983278	-0.350172	0.102444	0.555492	0.467854	0.818495	0.175405	53763859	Hydrogel	14.8619	0.00168883	14.8619	14.8619	14.8619
101418	-0.402668	0.283494	0.399592	0.0983278	-0.350172	0.102444	0.555492	0.467854	0.818495	0.175405	101418	Hydrogel	14.8619	0.00168883	14.8619	14.8619	14.8619
227045	-0.402668	0.283494	0.399592	0.0983278	-0.350172	0.102444	0.555492	0.467854	0.818495	0.307452	227045	Hydrogel	18.4182	0.00211314	18.4182	18.4182	18.4182
137179823	-0.402476	0.784219	0.39942	0.0781516	0.198551	0.0950931	0.204538	0.295178	0.676125	-0.464867	137179823	Anti-EBV	14.3272	0.00162504	14.3272	14.3272	14.3272
452050	-0.402393	0.136998	0.400579		-0.375315	0.00950646	0.062859	0.0497534	0.354017	-0.464867	452050	Anti-EBV	1.31977	7.30861e-05	1.31977	1.31977	1.31977
452052	-0.402393	0.136998	0.400579	0.102642	-0.375315	0.00950646	0.062859	0.0497534	0.354017	1.15565	452052	Hydrogel	80.6233	0.00953501	80.6233	80.6233	80.6233
12067880	-0.401615	0.906131	0.39096	0.449174	1.22063	0.209459	0.503981	0.683255	0.757474	0.162315	12067880	Anti-EBV	3.36104	0.000316636	3.36104	3.36104	3.36104
320720	-0.401489	0.514776	0.42659	0.587861	1.38679	0.0368128	0.145362	0.696695	0.574488	-0.868087	320720	Anti-EBV	6.12701	0.000646651	6.12701	6.12701	6.12701
137699513	-0.400099	0.263017	0.351634	0.0813459	-1.0199	0.125497	0.092606	0.315351	0.404382	-0.660067	137699513	Nontox	1.72876	0.000121883	1.72876	1.72876	1.72876
124554369	-0.399792	0.375621	0.400152	0.0522636	-0.0717458	0.0676589	0.50849	0.483614	0.809996	3.03505	124554369	Hydrogel	14.0999	0.00159792	14.0999	14.0999	14.0999
500900	-0.399792	0.375621	0.400152	0.0522636	-0.0717458	0.0676589	0.50849	0.483614	0.809996	-1.24409	500900	Anti-EBV	1.25657	6.55448e-05	1.25657	1.25657	1.25657
13871032	-0.399792	0.375621	0.400152	0.0522636	-0.0717458	0.0676589	0.50849	0.483614	0.809996	0.920877	13871032	Hydrogel	4.9861	0.000510526	4.9861	4.9861	4.9861
3009857	-0.399792	0.375621	0.400152	0.0522636	-0.0717458	0.0676589	0.50849	0.483614	0.809996	-0.747832	3009857	Anti-EBV	2.04	0.000159018	2.04	2.04	2.04
489881	-0.399247	0.759004	0.417084	0.0883527	-0.167055	0.0374361	0.175825	0.0342512	0.576953	1.14934	489881	Hydrogel	8.72433	0.000956545	8.72433	8.72433	8.72433
14885958	-0.398992	0.584455	0.380939		0.258589	0.0211452	0.07732	0.236761	0.49907	-1.77748	14885958	Anti-EBV	1.38172	8.04767e-05	1.38172	1.38172	1.38172
14885959	-0.398992	0.584455	0.380939	0.614456	0.258589	0.0211452	0.07732	0.236761	0.49907	0.252872	14885959	Anti-EBV	0.719494	1.46503e-06	0.719494	0.719494	0.719494
14885960	-0.398992	0.584455	0.380939	0.614456	0.258589	0.0211452	0.07732	0.236761	0.49907	-0.565556	14885960	Anti-EBV	6.28975	0.000666068	6.28975	6.28975	6.28975
480264	-0.398992	0.584455	0.380939	0.614456	0.258589	0.0211452	0.07732	0.236761	0.49907	0.875123	480264	Hydrogel	2.033	0.000158183	2.033	2.033	2.033
14367030	-0.396194	0.653441	0.383936	0.437099	-0.0728944	0.0619293	0.0787233	0.13204	0.567112	1.01158	14367030	Hydrogel	5.45072	0.000565961	5.45072	5.45072	5.45072
[truncated: 4,765 more rows]
